# Supplementary material for: Adventitial fibroblasts direct smooth muscle cell-state transition in pulmonary vascular disease
Source: bioRxiv preprint, doi:10.1101/2024.05.15.594343, version 4 (2025-02-20)
Supplement: GSEA comparison fresh and cultured cells [file 594343_file05.xlsx]

## Sheet: PASMC clusters
ID	Description.x	setSize.x	enrichmentScore.x	NES.x	pvalue.x	p.adjust.x	qvalue.x	rank.x	leading_edge.x	core_enrichment.x	Description.y	setSize.y	enrichmentScore.y	NES.y	pvalue.y	p.adjust.y	qvalue.y	rank.y	leading_edge.y	core_enrichment.y	Description	setSize	enrichmentScore	NES	pvalue	p.adjust	qvalue	rank	leading_edge	core_enrichment	p_min	p_max	p_min_orig	p_max_orig
GO:0000002	mitochondrial genome maintenance	30	0.309471	0.883437	0.670968	0.871806	0.770401	3284	tags=27%, list=16%, signal=22%	DNA2/PIF1/RRM1/PPARGC1A/MGME1/STOX1/PARP1/PRIMPOL	mitochondrial genome maintenance	30	-0.341572	-1.0431	0.378788	0.812864	0.757217	4232	tags=33%, list=20%, signal=27%	SLC25A4/OPA1/AKT3/LONP1/TP53/POLG2/MEF2A/DNA2/SLC25A36/SESN2	mitochondrial genome maintenance	31	0.221121	0.700026	0.876543	1	1	5102	tags=35%, list=28%, signal=26%	RRM2B/DNAJA3/POLG2/POLG/LONP1/ENDOG/TYMP/TP53/OPA1/PIF1/SESN2	0.378788	0.876543	p1_0.378787878787879	p0_0.876543209876543
GO:0000012	single strand break repair	10	0.34777	0.756183	0.793241	0.926858	0.81905	4041	tags=30%, list=20%, signal=24%	TDP1/PARP1/XRCC1	single strand break repair	11	0.478621	1.1081	0.324578	0.794763	0.740354	5266	tags=55%, list=25%, signal=41%	TDP1/TERF2/PARP1/ERCC6/APTX/APLF	single strand break repair	10	0.416709	1.00298	0.41092	1	1	2951	tags=20%, list=16%, signal=17%	ERCC6/XRCC1	0.324578	0.793241	p1_0.324577861163227	p3_0.79324055666004
GO:0000018	regulation of DNA recombination	104	0.429696	1.51677	0.00644276	0.100908	0.0891706	2475	tags=18%, list=12%, signal=16%	POLQ/ATAD5/BLM/IL10/RAD51AP1/PARPBP/FANCB/IL7R/TEX15/RMI2/TIMELESS/RAD51/CHEK1/FIGNL1/KPNA2/FUS/WRAP53/RTEL1/ANKLE1	regulation of DNA recombination	107	0.369718	1.40696	0.0136123	0.196096	0.182671	3823	tags=33%, list=18%, signal=27%	PIAS4/RPA2/ZRANB3/IL27RA/TGFB1/PARPBP/NDFIP1/FIGNL1/ACTR2/ERCC2/PPP4C/STAT6/KPNA2/TNFSF4/CLCF1/BLM/KHDC3L/WRAP53/KDM1A/MLH1/SLC15A4/MORF4L2/MSH2/PARP3/RTEL1/TERF2/HELB/KPNA1/RAD51/RUVBL2/TBX21/CD28/CHEK1/PARP1/DMAP1	regulation of DNA recombination	110	0.309072	1.28422	0.0510514	1	1	4354	tags=27%, list=24%, signal=21%	IL27RA/IL7R/CD28/FBH1/TGFB1/KMT5C/ERCC6/NSD2/WAS/RMI2/MSH2/RECQL5/USP51/PMS2/FANCB/SHLD3/MRGBP/PARP3/CGAS/SMARCAD1/HELB/SHLD1/PAXIP1/PTPRC/POLQ/OOEP/ZCWPW1/MAD2L2/KDM1A/BCL6	0.00644276	0.0510514	p3_0.00644276175245288	p0_0.0510513548670184
GO:0000022	mitotic spindle elongation	12	0.935492	2.09231	8.03939e-08	9.29443e-06	8.21334e-06	1020	tags=75%, list=5%, signal=71%	BIRC5/AURKB/CDCA8/KIF4A/PRC1/KIF23/RACGAP1/INCENP/KIF4B	mitotic spindle elongation	11	0.675719	1.56442	0.0183852	0.225593	0.21015	3370	tags=64%, list=16%, signal=53%	INCENP/AURKB/PRC1/CDCA8/BIRC5/RACGAP1/KIF23	mitotic spindle elongation	11	-0.650408	-1.36409	0.135303	1	1	4054	tags=82%, list=22%, signal=64%	AURKB/AURKC/PRC1/KIF23/INCENP/BIRC5/CDCA8/KIF4A/MAP10	8.03939e-08	0.135303	p3_8.03938838886662e-08	p0_0.135303265940902
GO:0000027	ribosomal large subunit assembly	21	-0.238699	-0.622731	0.95229	0.995032	0.879294	718	tags=33%, list=4%, signal=32%	RPL11/RPLP0/RPL5/RPL23A/RPL6/RPL10/RPL10L	ribosomal large subunit assembly	21	0.581442	1.60078	0.0185977	0.226981	0.211442	5072	tags=52%, list=24%, signal=40%	PPAN/RPF2/BOP1/RRS1/FASTKD2/BRIX1/NOP2/EIF6/DHX30/MRPL20/RPL6	ribosomal large subunit assembly	22	0.251237	0.744601	0.783217	1	1	6598	tags=45%, list=36%, signal=29%	NOP53/MRM2/BOP1/PPAN/TRAF7/MDN1/RRS1/RPL10/RPL23A/RPL11	0.0185977	0.95229	p1_0.0185976573069204	p3_0.952290076335878
GO:0000028	ribosomal small subunit assembly	16	-0.214791	-0.515847	0.980545	1	0.883684	15879	tags=38%, list=79%, signal=8%	RPS15/RPS27L/RPS5/RPS19/RPS14/RPS27	ribosomal small subunit assembly	14	0.379622	0.936544	0.549808	0.894447	0.833214	1792	tags=21%, list=9%, signal=20%	RRP7A/ERAL1/PWP2	ribosomal small subunit assembly	15	0.24156	0.646821	0.880368	1	1	6400	tags=33%, list=35%, signal=22%	PWP2/RPS27L/RPS27/RPS19/PRKDC	0.549808	0.980545	p1_0.549808429118774	p3_0.980544747081712
GO:0000038	very long-chain fatty acid metabolic process	32	-0.284258	-0.802174	0.787823	0.924263	0.816757	1160	tags=12%, list=6%, signal=12%	ELOVL3/ELOVL2/SLC27A6/ELOVL7	very long-chain fatty acid metabolic process	32	0.635425	1.91584	0.000317489	0.0217727	0.0202822	2529	tags=28%, list=12%, signal=25%	ELOVL6/ELOVL1/HACD2/TECRL/HACD1/ELOVL4/TECR/HACD3/ACSBG1	very long-chain fatty acid metabolic process	28	-0.270845	-0.67557	0.868673	1	1	3919	tags=18%, list=22%, signal=14%	ABCD1/CYP4F12/HACD1/ELOVL3/ABCD2	0.000317489	0.868673	p1_0.000317489468644826	p0_0.868673050615595
GO:0000041	transition metal ion transport	89	-0.459533	-1.54049	0.0111397	0.136362	0.120501	3658	tags=30%, list=18%, signal=25%	FTL/HEPH/SLC22A17/ABCB6/ASIC3/FTMT/ATP7B/PGRMC2/HEPHL1/SLC31A1/SLC11A2/SLC39A8/TF/FTH1/TCN1/TFR2/TRPM2/SLC39A5/SLC46A3/TMEM163/SLC39A14/TTYH1/LTF/SLC30A10/LCN2/MT3/CP	transition metal ion transport	96	0.316128	1.17741	0.163194	0.667177	0.621503	4985	tags=34%, list=24%, signal=26%	MCOLN1/SLC39A11/MMGT1/ATP13A1/RAB11B/SLC22A17/SLC31A2/SLC39A7/SLC46A3/HAMP/SLC30A6/SLC30A2/SLC39A13/SLC30A1/SLC39A3/SLC39A1/HRG/STEAP3/SLC39A9/HFE/CUTC/HPX/STEAP2/IFNG/ASIC3/SLC30A7/SLC39A12/PGRMC2/SLC39A10/SLC39A6/SLC30A10/FLVCR1/FLVCR2	transition metal ion transport	83	0.304593	1.21405	0.113528	1	1	3594	tags=28%, list=20%, signal=22%	SLC30A3/MELTF/FLVCR2/SLC1A1/HFE/NECTIN1/SLC39A14/SLC46A3/TF/TFR2/IFNG/SLC31A2/SLC31A1/SLC39A7/STEAP3/SLC22A17/STEAP4/B2M/SLC30A1/SLC30A7/ATP13A1/ABCC5/TMEM163	0.0111397	0.163194	p3_0.0111396536512744	p1_0.163194444444444
GO:0000045	autophagosome assembly	107	-0.313419	-1.07947	0.305903	0.641719	0.567077	7754	tags=46%, list=38%, signal=28%	SMCR8/RB1CC1/TCIRG1/RAB3GAP2/SMURF1/RAB3GAP1/STBD1/LRSAM1/SEC22B/ATG4B/ATG4D/RAB5A/RAB1A/PHF23/ARFIP2/WDR45B/MTMR3/PSEN1/MAP1LC3A/TBC1D12/C9orf72/GABARAPL2/WDR45/ATG9A/ATP2A2/TMEM39A/TP53INP2/FEZ1/GABARAP/RAB33B/ATG101/PIP4K2C/PIK3C3/ULK1/IFT20/MOAP1/ATG9B/ATG13/TP53INP1/TOM1/TMEM41B/RUFY4/RAB43/WIPI1/GABARAPL1/CTSD/MAP1LC3B/MAP1LC3B2/NUPR1	autophagosome assembly	108	-0.259903	-0.996616	0.440389	0.843237	0.78551	6109	tags=38%, list=29%, signal=27%	ATG12/TMEM39A/SNX7/AMBRA1/LRRK2/LRSAM1/WDR45/STX17/ATG13/MAP1LC3B2/PACS2/ATG2A/MAP1LC3A/ATG5/PIP4K2B/GABARAP/ULK2/ATG2B/RAB3GAP2/GABARAPL1/GABARAPL2/IFT20/CTSD/ATG16L2/LRBA/FEZ1/EHMT2/WIPI1/MAP1LC3B/ATP2A2/MTMR3/RAB43/EFNB1/TRAF6/TBC1D14/ULK1/MAP1LC3C/NUPR1/PIKFYVE/TP53INP1/TBC1D12	autophagosome assembly	104	-0.104855	-0.315869	1	1	1	6406	tags=29%, list=35%, signal=19%	TP53INP1/STX12/SH3GLB1/ULK1/EMC6/UBXN2B/ATG101/C9orf72/RB1CC1/SNX30/UBQLN1/BECN1/STBD1/STX17/EPHB2/TRAF6/ATG5/WIPI1/TMEM41B/ATG2A/ATG4A/RAB1B/ATP2A2/NUPR1/TP53INP2/GABARAPL1/BAG3/ATG4C/MAP1LC3B2/ATG9A	0.305903	1	p3_0.305903398926655	p0_1
GO:0000050	urea cycle	9	-0.271234	-0.576075	0.932	0.986617	0.871858	5277	tags=44%, list=26%, signal=33%	CEBPA/ARG2/ASS1/OTC	urea cycle	11	0.365019	0.845091	0.692308	0.934994	0.870986	2349	tags=18%, list=11%, signal=16%	AGMAT/ASL	urea cycle	10	-0.370097	-0.767142	0.723242	1	1	2559	tags=60%, list=14%, signal=52%	ASL/OTC/CPS1/AGMAT/ARG1/SLC25A15	0.692308	0.932	p1_0.692307692307692	p3_0.932
GO:0000054	ribosomal subunit export from nucleus	15	0.421603	1.01306	0.447423	0.746183	0.65939	6239	tags=40%, list=31%, signal=28%	XPO1/NOP9/RAN/ABCE1/NUP88/LSG1	ribosomal subunit export from nucleus	15	0.657579	1.66538	0.0066677	0.140935	0.131287	4258	tags=67%, list=20%, signal=53%	ABCE1/RAN/RIOK2/NUP88/NPM1/LSG1/LTV1/NOP9/SDAD1/EIF6	ribosomal subunit export from nucleus	15	0.226035	0.60525	0.932515	1	1	14023	tags=100%, list=77%, signal=23%	NUP88/MDN1/NPM1/EIF6/RPS15/XPO1/NMD3/RIOK2/SDAD1/ABCE1/RAN/LSG1/LTV1/TSC1/NOP9	0.0066677	0.932515	p1_0.00666770139285005	p0_0.932515337423313
GO:0000070	mitotic sister chromatid segregation	181	0.734921	2.80819	1e-10	1.68977e-08	1.49322e-08	1622	tags=35%, list=8%, signal=32%	KIF18B/SPC24/SPC25/DLGAP5/BIRC5/CDC20/BUB1B/NCAPG/NUF2/KIFC1/AURKB/SKA3/NCAPH/PLK1/NEK2/TTK/CDCA8/BUB1/NUSAP1/CENPE/CENPF/KIF4A/KIF14/ZWINT/CCNB1/MYBL2/PRC1/SPAG5/CDK1/ESPL1/NDC80/KIF2C/KIF11/CDCA5/TRIP13/UBE2C/UHRF1/CENPI/KIF18A/KIF23/RACGAP1/MAD2L1/CENPK/CDT1/SKA1/NCAPG2/KNTC1/USP44/TPX2/PSRC1/KIF25/SMC4/XRCC3/KIF22/INCENP/KIF4B/FBXO5/TTN/KNSTRN/GEN1/ANKRD53/NCAPD3/ZWILCH	mitotic sister chromatid segregation	179	0.514067	2.08391	7.71083e-10	7.93187e-07	7.38887e-07	4533	tags=46%, list=22%, signal=36%	SKA1/TRIP13/KIF18A/NCAPH/RMDN1/CEP97/INCENP/ZWILCH/DYNC1LI1/AURKB/SPICE1/ZW10/DIS3L2/GEN1/NCAPG/TUBG1/WRAP73/UBE2C/EML3/SMC1A/PLK1/CCNB1/TRIP13/SKA3/TTK/RAN/PRC1/KIF2A/TUBG2/CHMP6/SPDL1/ESPL1/PRICKLE1/KIF22/CDC23/TEX14/BCCIP/NUDC/MAPRE1/NEK2/KIFC1/PSRC1/MYBL2/CHMP1A/AAAS/SMC2/RRS1/STAG1/CDCA5/DRG1/NDC80/CHMP7/SMC4/BUB1/MAD2L1/CDCA8/RB1/PINX1/ANAPC7/VPS4A/KIF11/BUB1B/HNRNPU/BIRC5/CDC20/RACGAP1/KIF…	mitotic sister chromatid segregation	179	-0.143938	-0.451355	1	1	1	4701	tags=20%, list=26%, signal=15%	PRICKLE1/SMC3/KIF11/MYBL2/SPAG5/CLASP2/SMC1A/USP44/PRC1/CENPK/KIF23/NCAPD3/ANAPC15/FBXO5/KIF2A/NUF2/INCENP/BIRC5/CDCA8/BUB1/KIF4A/FLNA/RMDN1/SPDL1/UBE2C/GEN1/ANKRD53/UHRF1/DLGAP5/KAT2B/TTN/MAP10/NCAPH/MISP/CDT1/PINX1	1e-10	1	p3_1e-10	p0_1
GO:0000075	cell cycle checkpoint signaling	180	0.621429	2.36618	1e-10	1.68977e-08	1.49322e-08	1654	tags=26%, list=8%, signal=24%	SPC24/SPC25/CLSPN/BIRC5/CDC20/BUB1B/NUF2/AURKB/PLK1/BRIP1/TTK/CDCA8/GTSE1/BUB1/CENPF/ZWINT/CCNB1/CDK1/ORC1/NDC80/BLM/DTL/TRIP13/MAD2L1/FANCD2/EME1/CDT1/E2F1/KNTC1/USP44/CDC45/TICRR/BARD1/WDR76/XRCC3/INCENP/BRCA2/TIMELESS/BRCA1/RAD51/DNA2/CDK2/GEN1/HORMAD1/CHEK1/ZWILCH/HUS1B	cell cycle checkpoint signaling	179	0.33874	1.37317	0.0087064	0.162344	0.15123	4867	tags=39%, list=23%, signal=30%	RPA2/TRIP13/INCENP/ZWILCH/DYNC1LI1/AURKB/ZW10/GEN1/CCAR2/TICRR/BRIP1/PLK1/CDC45/CCNB1/CDK2/TRIP13/TOPBP1/TTK/SPDL1/TAOK2/TREX1/ZFYVE19/TTI2/TIPIN/TEX14/DOT1L/BLM/UFL1/FBXO6/ATR/NDC80/TTI1/DTX3L/BUB1/MAD2L1/E2F1/CDCA8/MSH2/VPS4A/BUB1B/BIRC5/CDC20/MAPK14/RAD51/NUF2/BUB3/BRSK1/GNB1L/SPC25/FZR1/SYF2/GTSE1/CHEK1/NSUN2/RFWD3/HUS1/ERCC6/CDK1/PRPF19/HUS1B/BRCA1/CDT1/ZWINT/PCID2/NAE1/TIPRL/TELO2/CLOCK/CDK…	cell cycle checkpoint signaling	179	-0.134317	-0.421185	1	1	1	6677	tags=36%, list=37%, signal=23%	AURKB/SPC24/CHEK1/EIF2AK4/CDK5RAP2/PIDD1/FBXO4/CENPF/WAC/RPA4/TPR/NSUN2/CRY1/UFL1/MDC1/FEM1B/RINT1/ATRIP/FOXN3/CLOCK/TTI1/PARP9/WDR76/MBTPS2/CHEK2/GIGYF2/E2F7/BUB1B/ZWILCH/MUS81/RHNO1/ZWINT/MRE11/BABAM1/PLK2/CDKN1A/NAE1/CHFR/GTSE1/CDK2/CASP2/BARD1/USP44/EME2/ANAPC15/PTPN11/NUF2/INCENP/BIRC5/CDCA8/BUB1/HUS1B/RAD51/SPDL1/GEN1/CLSPN/CDC6/DNA2/RAD50/IER3/MUC1/PROX1/DOT1L/CDT1	1e-10	1	p3_1e-10	p0_1
GO:0000076	DNA replication checkpoint signaling	20	0.716394	1.8645	0.00197293	0.0457512	0.0404296	3650	tags=70%, list=18%, signal=57%	CLSPN/ORC1/CDT1/CDC45/TICRR/TIMELESS/DNA2/HUS1B/DONSON/RAD9B/TOPBP1/TIPIN/CDC6/MDC1	DNA replication checkpoint signaling	20	-0.341516	-0.941656	0.551724	0.894939	0.833672	1147	tags=15%, list=5%, signal=14%	DNA2/CDC6/CAMSAP3	DNA replication checkpoint signaling	17	-0.388894	-0.891888	0.609375	1	1	3618	tags=35%, list=20%, signal=28%	NAE1/HUS1B/CLSPN/CDC6/DNA2/CDT1	0.00197293	0.609375	p3_0.0019729284015165	p0_0.609375
GO:0000077	DNA damage checkpoint signaling	117	0.500997	1.80973	5.30472e-05	0.00283055	0.00250131	3448	tags=26%, list=17%, signal=22%	CLSPN/PLK1/BRIP1/GTSE1/CDK1/BLM/DTL/FANCD2/EME1/E2F1/TICRR/BARD1/WDR76/BRCA2/BRCA1/RAD51/CDK2/CHEK1/HUS1B/RFWD3/CCND1/DONSON/RAD9B/TOPBP1/EME2/DOT1L/TIPIN/CASP2/ATRIP/TELO2/PRAP1	DNA damage checkpoint signaling	116	0.276211	1.05532	0.364111	0.810826	0.755318	4867	tags=34%, list=23%, signal=26%	RPA2/CCAR2/TICRR/BRIP1/PLK1/CDK2/TOPBP1/TAOK2/TREX1/TTI2/TIPIN/DOT1L/BLM/UFL1/FBXO6/ATR/TTI1/DTX3L/E2F1/MSH2/MAPK14/RAD51/BRSK1/GNB1L/FZR1/SYF2/GTSE1/CHEK1/RFWD3/HUS1/ERCC6/CDK1/PRPF19/HUS1B/BRCA1/TIPRL/TELO2/CLOCK/CDK5RAP3/FBXO31	DNA damage checkpoint signaling	117	0.110901	0.468198	1	1	1	5273	tags=27%, list=29%, signal=20%	NEK11/ERCC6/NOP53/MSH2/PML/BRCA1/DTX3L/GNB1L/DONSON/TIPIN/CCND1/CDK1/TRIM39/FOXO4/FBXO6/BABAM2/RAD9A/RPS27L/PLK1/ATR/CDKN1B/TP53/NBN/SDE2/RFWD3/MAPK14/MDM2/HINFP/PPP1R10/ATF2/ABRAXAS1/RPA2	5.30472e-05	1	p3_5.30472398331281e-05	p0_1
GO:0000079	regulation of cyclin-dependent protein serine/threonine kinase activity	74	0.526723	1.77047	0.000563606	0.0181558	0.016044	971	tags=19%, list=5%, signal=18%	PKMYT1/PLK1/CCNB2/CCNA2/CDKN3/CCNB1/CCNE2/CDC25C/RGCC/BLM/CDKN2C/CCNF/PSRC1/CDC25A	regulation of cyclin-dependent protein serine/threonine kinase activity	74	-0.287039	-1.03444	0.402381	0.82977	0.772965	2756	tags=21%, list=13%, signal=19%	CCNG1/CDKN1A/CCNJ/TFAP4/PROX1/HEXIM2/MYOCD/EGFR/CDKN1B/CCNI/LATS2/CDC6/HHEX/PTEN/CDKN1C/CCNG2	regulation of cyclin-dependent protein serine/threonine kinase activity	68	0.272796	1.04387	0.355828	1	1	3277	tags=21%, list=18%, signal=17%	CDKN2A/CCNE1/CCNE2/CCNO/CCNB1/PTEN/MEN1/CDKN2B/CCND3/CCND1/PSRC1/CDKN2C/CCNJL/DIRAS3	0.000563606	0.402381	p3_0.000563606387449328	p1_0.402380952380952
GO:0000082	G1/S transition of mitotic cell cycle	202	0.386592	1.49842	0.00203604	0.0466631	0.0412354	2857	tags=19%, list=14%, signal=16%	FGF10/RRM2/IQGAP3/GTSE1/CCNA2/CDKN3/KIF14/CCNE2/CDK1/RGCC/E2F1/CDKN2C/STIL/CDC25A/RBL1/CDC7/EZH2/DBF4/CDK2/MTBP/CENPJ/HYAL1/RRM1/DPF1/POLE/MIR221/SASS6/SKP2/RFWD3/CAMK2A/MYO16/STOX1/KANK2/CCND1/TFDP1/CDKN2D/CCND3/DPF3	G1/S transition of mitotic cell cycle	208	-0.208005	-0.878626	0.820144	0.966142	0.900001	3915	tags=22%, list=19%, signal=18%	TRIM71/PLCB1/DDR2/TP53/KMT2E/RBL2/E2F7/DACT1/ADAM17/ATM/HINFP/GJC2/CUL1/GPR132/CAMK2A/MNAT1/RPS27L/USP26/CDKN1A/DCUN1D3/CTDSP2/DLG1/CUL5/BRD7/DPF2/JADE1/ID2/CDC34/CACNB4/EGFR/MIR221/ZNF655/MUC1/ID4/E2F3/CTDSPL/PHF10/CTDSP1/PLK2/CDKN1B/ARID2/TMEM14B/LATS2/AIF1/CDC6/PTEN	G1/S transition of mitotic cell cycle	192	-0.145583	-0.457429	1	1	1	6283	tags=35%, list=35%, signal=23%	CTDSP2/DACT1/CACUL1/BTN2A2/RRM1/PBRM1/LSM10/DBF4/CUL1/LATS2/PHF10/CUL5/KANK2/CCNH/SMARCD2/PSME3/CHEK2/GIGYF2/INO80/STIL/E2F7/PIAS1/CDK2AP2/USP37/BCL7A/PLK2/CDKN1A/KCNA5/BCL7B/GSPT1/MEPCE/BCL7C/GTSE1/CDK2/CASP2/ID4/CDKN3/ACTB/TAF10/PPP6C/PPP2CA/SLFN11/EGFR/CCND2/ID2/DPF3/MBLAC1/RBL1/GJC2/SMARCE1/RHOU/LSM11/WEE1/POLE/CDC6/FAM107A/CDC7/CDC34/PLCB1/MYC/ADAMTS1/MTBP/MUC1/STOX1/CCNA2/CCL2/FGF10	0.00203604	1	p3_0.00203604428103437	p0_1
GO:0000086	G2/M transition of mitotic cell cycle	125	0.567513	2.06146	7.13871e-08	8.34588e-06	7.37512e-06	2761	tags=30%, list=14%, signal=26%	CLSPN/PKMYT1/KCNH5/AURKB/PLK1/CCNA2/FOXM1/CENPF/KIF14/CCNB1/CDK1/ORC1/CDC25C/AURKA/BLM/DTL/DBF4B/TICRR/BARD1/MELK/CDC25A/FBXO5/CDC7/NES/BRCA1/CDK2/CHEK1/RRM1/HUS1B/SKP2/CDC25B/STOX1/MASTL/CCND1/DONSON/RAD21/TOPBP1/NABP1	G2/M transition of mitotic cell cycle	127	0.29536	1.14404	0.192644	0.687489	0.640424	4595	tags=29%, list=22%, signal=23%	CALM1/AURKB/SKP2/TICRR/PLK1/CCNB1/CDK2/TOPBP1/ABCB1/RCC2/TAOK2/ZFYVE19/CDC25C/PPME1/BLM/MIIP/MELK/VPS4A/WNT10B/PKMYT1/RRM1/BRSK1/FZR1/SYF2/KCNH5/CHEK1/CCNA2/HUS1/CDK1/FOXM1/HUS1B/KIF14/UBE2A/CDK6/BRCA1/AURKA/NAE1	G2/M transition of mitotic cell cycle	124	-0.170991	-0.519363	0.997778	1	1	4820	tags=21%, list=27%, signal=15%	MRE11/WNT10B/BABAM1/CDKN1A/NAE1/AVEN/CHFR/CDK2/RAD51C/BARD1/KDM8/FBXO5/HUS1B/CLSPN/WEE1/CDC6/CDC7/PLCB1/DBF4B/AURKA/RAD50/IER3/STOX1/CCNA2/BRSK2/PKIA	7.13871e-08	0.997778	p3_7.13871185684692e-08	p0_0.997777777777778
GO:0000096	sulfur amino acid metabolic process	31	-0.293484	-0.826198	0.739372	0.903802	0.798676	1307	tags=16%, list=6%, signal=15%	CBS/GGT1/SLC7A11/CTH/DPEP1	sulfur amino acid metabolic process	32	-0.303758	-0.937573	0.569196	0.906341	0.844294	3787	tags=22%, list=18%, signal=18%	CBS/SLC7A11/APIP/MTHFR/GNMT/MSRA/GCLM	sulfur amino acid metabolic process	27	-0.410947	-1.02344	0.418827	1	1	5447	tags=48%, list=30%, signal=34%	MTHFD1/APIP/GNMT/SMS/CPS1/MPST/MTHFD2L/MSRA/GCLM/BHMT2/GGT1/TST/CTH	0.418827	0.739372	p0_0.418826739427012	p3_0.739371534195933
GO:0000097	sulfur amino acid biosynthetic process	16	0.348582	0.857495	0.661885	0.866938	0.766099	2969	tags=31%, list=15%, signal=27%	BHMT/BHMT2/MTHFD1/CDO1/MRI1	sulfur amino acid biosynthetic process	16	0.419492	1.07174	0.390152	0.819134	0.763057	2615	tags=25%, list=12%, signal=22%	MTHFD1/ADI1/MTAP/MTRR	sulfur amino acid biosynthetic process	14	-0.428747	-0.935483	0.547619	1	1	5981	tags=43%, list=33%, signal=29%	MTHFD1/APIP/MTHFD2L/BHMT2/GGT1/CTH	0.390152	0.661885	p1_0.390151515151515	p3_0.661885245901639
GO:0000098	sulfur amino acid catabolic process	9	0.509634	1.07559	0.388446	0.707881	0.625543	43	tags=11%, list=0%, signal=11%	FMO1	sulfur amino acid catabolic process	10	0.574361	1.30943	0.153119	0.658393	0.613321	2615	tags=30%, list=12%, signal=26%	MAT1A/BLMH/MTRR	sulfur amino acid catabolic process	7	0.353606	0.759435	0.742782	1	1	3576	tags=43%, list=20%, signal=34%	FMO1/CSAD/CDO1	0.153119	0.742782	p1_0.153119092627599	p0_0.742782152230971
GO:0000101	sulfur amino acid transport	11	-0.709793	-1.582	0.0235223	0.201274	0.177863	2804	tags=55%, list=14%, signal=47%	CTNS/SLC3A1/SLC7A5/SLC3A2/SLC7A11/SLC1A4	sulfur amino acid transport	12	-0.462609	-1.11284	0.32618	0.795427	0.740973	3339	tags=50%, list=16%, signal=42%	SLC7A11/SLC7A13/CTNS/SLC3A2/SLC7A5/SLC1A4	sulfur amino acid transport	9	0.49705	1.15109	0.272989	1	1	4376	tags=56%, list=24%, signal=42%	SLC1A1/SLC1A4/SLC1A2/SLC43A2/CTNS	0.0235223	0.32618	p3_0.0235222595568384	p1_0.32618025751073
GO:0000132	establishment of mitotic spindle orientation	34	0.659757	1.92032	0.000299145	0.0108832	0.00961735	697	tags=24%, list=3%, signal=23%	INSC/FGF10/SAPCD2/PLK1/CENPA/NDC80/MAD2L1/GPSM2	establishment of mitotic spindle orientation	35	0.440958	1.3577	0.0859232	0.545595	0.508244	3207	tags=29%, list=15%, signal=24%	NSFL1C/ZW10/PLK1/SPDL1/MAPRE1/DYNLT1/NDC80/MAD2L1/PAX6/ITGB1	establishment of mitotic spindle orientation	32	-0.158761	-0.404086	0.998679	1	1	1371	tags=38%, list=8%, signal=35%	CDK5RAP2/FBXW11/UBXN2B/DYNLT1/PAFAH1B1/ANKFN1/GPSM1/SPRY2/GJA1/SPDL1/MISP/FGF10	0.000299145	0.998679	p3_0.000299145177646804	p0_0.998678996036988
GO:0000154	rRNA modification	31	0.295806	0.849354	0.72885	0.899106	0.794526	7260	tags=61%, list=36%, signal=39%	FDXACB1/FBL/NSUN5P1/GAR1/NSUN5P2/RPUSD1/METTL5/MRM1/DIMT1/NAT10/NOP2/FTSJ3/EMG1/TSR3/ZCCHC4/METTL16/TFB1M/TRMT2B/NSUN5	rRNA modification	29	0.588028	1.72495	0.00248777	0.0814746	0.075897	4444	tags=48%, list=21%, signal=38%	TRMT61B/DIMT1/MRM1/DKC1/METTL15/EMG1/NAT10/NSUN4/GAR1/NOP2/FTSJ3/TFB2M/RPUSD1/ZCCHC4	rRNA modification	31	0.244199	0.773089	0.806584	1	1	4827	tags=26%, list=27%, signal=19%	MRM2/TRMT61B/BUD23/TFB1M/GAR1/RPUSD2/EMG1/NAT10	0.00248777	0.806584	p1_0.00248776591524022	p0_0.806584362139918
GO:0000184	nuclear-transcribed mRNA catabolic process, nonsense-mediated decay	39	-0.174635	-0.510156	0.998152	1	0.883684	6889	tags=26%, list=34%, signal=17%	EIF3E/PABPC1/SMG6/SECISBP2/NBAS/SMG8/CTIF/PNLDC1/PNRC1/ZC3H12A	nuclear-transcribed mRNA catabolic process, nonsense-mediated decay	39	-0.267216	-0.855595	0.730684	0.948299	0.883379	4199	tags=28%, list=20%, signal=23%	DCP1B/UPF3B/ZC3H12A/GSPT2/CTIF/NBAS/SMG7/PNLDC1/PNRC1/RC3H1/SMG1	nuclear-transcribed mRNA catabolic process, nonsense-mediated decay	38	0.180405	0.598209	0.986425	1	1	14853	tags=100%, list=82%, signal=18%	DHX34/UPF1/SMG7/EIF4A3/SMG8/DCP1B/SMG9/PABPC1/MAGOH/EIF3E/SECISBP2/HNRNPAB/RC3H1/NCBP2/MAGOHB/PYM1/SMG1/CASC3/SMG5/UPF2/ETF1/RBM8A/RNPS1/UPF3A/PNRC1/PARN/NCBP1/SMG6/DCP2/GSPT2/DCP1A/GSPT1/EXOSC10/UPF3B/ZC3H12A/PNRC2/NBAS/CTIF	0.730684	0.998152	p1_0.730684326710817	p3_0.99815157116451
GO:0000209	protein polyubiquitination	252	0.166231	0.665799	1	1	0.883684	3678	tags=11%, list=18%, signal=9%	TRIM55/PRAME/DTL/UBE2C/BARD1/FOXF2/UBE2T/RNF144A/BRCA1/TRIM6/MKRN3/SKP2/RNF125/UBE2S/UBE2E3/DCAF15/RNF115/NEDD4/RNF152/ZNF738/C10orf90/RFFL/WDR77/THOP1/TRIM31/ARRDC4/RUSC1	protein polyubiquitination	253	-0.219558	-0.95568	0.613139	0.916355	0.853623	4769	tags=24%, list=23%, signal=19%	UBE2E3/UBE4B/RNF187/BCL2/GABARAP/HECTD2/TTC3/HUWE1/CBL/NQO1/AMFR/HDAC6/UBR5/ANAPC11/SHPRH/TCF25/PELI1/UBE2W/TRIM71/CHFR/PARP10/UBOX5/TRIM3/WSB1/NT5C2/RNF20/TRIM2/RNF152/CUL1/RC3H2/UBE2G1/TRIM56/MYCBP2/TMEM129/RNF183/SPOP/UBE2Q1/RNF125/TPP2/UBE2J1/MKRN1/TRIM25/CDC34/TRAF6/TNKS/TRIM32/RNF31/UBE2QL1/UBE2H/NPEPPS/TRIM8/RC3H1/FOXF2/RNF170/ZNRF1/PELI3/HACE1/UBE3D/NEDD4L/RNF217/RNF41/RNF180	protein polyubiquitination	236	0.164163	0.759068	1	1	1	3538	tags=15%, list=20%, signal=12%	ARRDC4/IFI27/TNFAIP3/BCL2/PEX12/ZNF738/TRIM22/HACE1/CBFB/PELI3/KLHL20/PTPN22/TRAF3/BRCA1/KLHL3/HDAC6/DDB2/DTX3L/RFFL/RNF123/UBE2O/SMURF1/TRAF2/NHLRC3/PELI1/AMBRA1/TRAF3IP2/TRIM5/AREL1/TPP2/IRF2BP1/TRAF1/RNF166/ZNF598/SKP2/WWP2	0.613139	1	p1_0.613138686131387	p3_1
GO:0000212	meiotic spindle organization	16	0.763555	1.87831	0.0010239	0.0292682	0.0258639	1037	tags=38%, list=5%, signal=36%	ASPM/CCNB2/ESPL1/AURKA/NDC80/FBXO5	meiotic spindle organization	17	0.42056	1.08475	0.368121	0.810826	0.755318	6063	tags=65%, list=29%, signal=46%	TUBG1/TUBG2/ESPL1/TUBB8/CCNB2/NDC80/DCAF13/AURKA/ASPM/MOS/FBXO5	meiotic spindle organization	16	0.414674	1.12549	0.282468	1	1	1823	tags=19%, list=10%, signal=17%	NDC80/ESPL1/PTEN	0.0010239	0.368121	p3_0.00102389588265979	p1_0.368121442125237
GO:0000244	spliceosomal tri-snRNP complex assembly	17	-0.42111	-1.03724	0.398467	0.715926	0.632652	188	tags=18%, list=1%, signal=17%	RNU6ATAC/TSSC4/SRSF12	spliceosomal tri-snRNP complex assembly	16	0.568614	1.45273	0.0700758	0.516119	0.480786	5981	tags=56%, list=28%, signal=40%	RNU6ATAC/AAR2/SRSF10/PRPF31/PRPF3/DDX20/PRPF19/RNU4ATAC/PRPF8	spliceosomal tri-snRNP complex assembly	14	-0.24674	-0.538363	0.959821	1	1	13649	tags=50%, list=75%, signal=12%	CD2BP2/USP4/PRPF31/AAR2/SRSF12/PRPF3/DDX20	0.0700758	0.959821	p1_0.0700757575757576	p0_0.959821428571429
GO:0000245	spliceosomal complex assembly	80	0.191796	0.655111	0.990909	1	0.883684	6872	tags=41%, list=34%, signal=27%	RNU1-4/PTBP2/RNU2-1/SNRPA1/GEMIN6/SRSF1/PSIP1/SRPK1/U2AF2/GCFC2/SMN2/SNRPB/SNRPE/CELF1/SNRPF/DDX46/SNRPD1/SF3B4/NCBP1/PRPF39/DDX39B/SF3B3/PUF60/BUD13/SRSF10/HTATSF1/DDX23/SNRPC/SRSF6/SF3A3/SNRPD3/SF3A1/PHF5A	spliceosomal complex assembly	78	0.354325	1.28394	0.0846024	0.541822	0.50473	4774	tags=30%, list=23%, signal=23%	SNIP1/PHF5A/SRSF6/RNU6ATAC/DDX39B/U2AF2/SNRPA1/SF3B1/SF3A2/PUF60/SNRPB2/ISY1/SRSF10/CELF1/SF3A3/SNRPB/SRPK3/SRSF6/SNRPC/PRPF19/NCBP1/SNRPD1/SF3B3/LUC7L2	spliceosomal complex assembly	73	0.132936	0.510151	1	1	1	5028	tags=16%, list=28%, signal=12%	SMN1/KHDC4/SMN2/NOL3/GEMIN6/RSRP1/DDX23/BUD13/U2AF2/SF3A2/SETX/SF3A1	0.0846024	1	p1_0.0846023688663283	p0_1
GO:0000266	mitochondrial fission	37	0.333038	0.989993	0.492375	0.774008	0.683979	4772	tags=35%, list=24%, signal=27%	AURKA/MTFR2/PPARG/UCP2/MYO19/INF2/GDAP1/PGAM5/DCN/SLC25A46/MCU/LRRK2/OPA1	mitochondrial fission	37	0.245513	0.765232	0.853261	0.967994	0.901726	3522	tags=22%, list=17%, signal=18%	COX10/MTFR2/KDR/DDHD1/INF2/MUL1/MYO19/SLC25A46	mitochondrial fission	37	-0.307497	-0.799525	0.717448	1	1	2193	tags=14%, list=12%, signal=12%	DCN/AURKA/KDR/GDAP1/MAPT	0.492375	0.853261	p3_0.492374727668845	p1_0.853260869565217
GO:0000271	polysaccharide biosynthetic process	60	-0.299634	-0.946564	0.543517	0.80024	0.70716	4237	tags=30%, list=21%, signal=24%	CSGALNACT2/TGFB1/NFKB1/EXT1/GBE1/PPP1R3C/EXT2/INPP5K/PPP1R3F/HAS3/IRS2/SORBS1/PPP1R3B/INSR/CSGALNACT1/PPP1R3A/HAS1/PDGFB	polysaccharide biosynthetic process	61	0.244694	0.845438	0.761168	0.956841	0.891337	2129	tags=13%, list=10%, signal=12%	PASK/AKT2/TGFB1/HAS2/CSGALNACT2/PGM2/PER2/AP2A1	polysaccharide biosynthetic process	52	-0.400511	-1.10168	0.32375	1	1	2900	tags=31%, list=16%, signal=26%	HS2ST1/IRS2/ACADM/GYG1/NDST2/GBE1/SORBS1/NDST1/PASK/INSR/PPP1R3B/NR1D1/HAS1/IGF1/HAS2/IGF2	0.32375	0.761168	p0_0.32375	p1_0.761168384879725
GO:0000272	polysaccharide catabolic process	16	-0.289077	-0.694254	0.875486	0.964253	0.852096	2466	tags=19%, list=12%, signal=16%	PPP1R3B/GAA/PYGM	polysaccharide catabolic process	16	-0.341407	-0.893704	0.599156	0.912753	0.850267	942	tags=12%, list=4%, signal=11%	CHIA/PPP1R3B	polysaccharide catabolic process	14	0.288468	0.761062	0.781818	1	1	97	tags=7%, list=1%, signal=7%	CHIT1	0.599156	0.875486	p1_0.59915611814346	p3_0.875486381322957
GO:0000280	nuclear division	403	0.564092	2.34443	1e-10	1.68977e-08	1.49322e-08	2141	tags=29%, list=11%, signal=27%	FBXO43/KIF18B/MKI67/SPC24/SPC25/ANLN/DLGAP5/PKMYT1/BIRC5/ASPM/CDC20/BUB1B/NCAPG/NUF2/KIFC1/AURKB/SKA3/NCAPH/PLK1/BRIP1/CCNB2/TOP2A/NEK2/TTK/CDCA8/BUB1/NUSAP1/C14orf39/CENPE/CENPF/KIF4A/KIF14/ZWINT/CCNB1/MYBL2/PRC1/SPAG5/CCNE2/CDK1/ESPL1/KIF20B/CDC25C/RGCC/AURKA/NDC80/KIF2C/KIF11/MYBL1/CDCA5/TRIP13/RAD54L/UBE2C/UHRF1/CENPI/KIF18A/FANCA/MND1/RAD51AP1/KIF23/RACGAP1/CDCA2/RBM46/MAD2L1/FANCD2/CENPK/EM…	nuclear division	413	0.36047	1.57995	5.89042e-06	0.00138179	0.00128719	3860	tags=31%, list=18%, signal=26%	SPHK1/SIRT2/SKA1/TRIP13/KIF18A/NCAPH/RMDN1/MSX1/CEP97/CDC14A/INCENP/SPO11/ZWILCH/DYNC1LI1/NSFL1C/AURKB/SPICE1/ZW10/DIS3L2/GEN1/FANCM/PIWIL2/PSMD13/NCAPG/TUBG1/WRAP73/ANKLE2/C14orf39/UBE2C/EML3/RAD54B/SMC1A/BRIP1/PLK1/FIGNL1/CCNB1/PRMT5/TRIP13/REEP3/DMRTC2/SKA3/SYCP2/TTK/RAN/PRC1/PSMC3IP/RAD51D/ACTR2/KIF2A/TUBG2/CHMP6/SPDL1/TDRKH/ESPL1/BCL2L11/PRICKLE1/KIF22/CDC23/CDC25C/TEX14/BCCIP/NUDC/MAPRE1/NE…	nuclear division	364	-0.173789	-0.557178	1	1	1	4924	tags=24%, list=27%, signal=18%	MUS81/HSPA1A/ZWINT/CAV2/NFIB/CCNB1IP1/MRE11/NFIA/PRICKLE1/SMC3/CHFR/KIF11/MYBL2/SPAG5/IL1A/SYCP2/CLASP2/UBR2/MLH1/RAD51C/PDGFRB/SMC1A/USP44/PRC1/CENPK/KIF23/NCAPD3/EME2/ANAPC15/FBXO5/KIF2A/SLX4/NUF2/INCENP/MKI67/BIRC5/CDCA8/BUB1/KIF4A/FBXO43/TEX12/RAD51/ING2/FLNA/RPS6KA2/RMDN1/EREG/SPDL1/UBE2C/L3MBTL1/GEN1/ANKRD53/FANCM/UHRF1/DAPK3/SYCP2L/DLGAP5/SPIRE2/PIWIL2/PLCB1/MSX1/MYBL1/SYCP3/AURKA/RAD54L/K…	1e-10	1	p3_1e-10	p0_1
GO:0000281	mitotic cytokinesis	86	0.673631	2.32726	4.73933e-10	7.47163e-08	6.60256e-08	1020	tags=24%, list=5%, signal=23%	KIF20A/ANLN/CEP55/BIRC5/CIT/AURKB/PLK1/IQGAP3/CDCA8/NUSAP1/KIF4A/ESPL1/KIF20B/CENPA/KIF23/STMN1/RACGAP1/CKAP2/ECT2/INCENP/KIF4B	mitotic cytokinesis	85	0.322313	1.17731	0.174825	0.681258	0.63462	3801	tags=27%, list=18%, signal=22%	INCENP/PDCD6IP/AURKB/RAB35/PLK1/CEP55/EXOC1/CHMP6/ARF1/ESPL1/CHMP1A/CHMP7/RHOC/CDCA8/KIF20B/VPS4A/BIRC5/RACGAP1/KIF23/ANLN/ROCK1/CKAP2/NUSAP1	mitotic cytokinesis	85	0.140052	0.55655	1	1	1	15589	tags=100%, list=86%, signal=14%	CHMP4C/ESPL1/ZFYVE26/IQGAP2/EXOC2/SPTBN1/ANK3/TRIM36/RTKN/KIF20B/CENPA/EFHC1/UNC119/CNTROB/PLK1/JTB/EXOC6B/SNX33/CUL7/CHMP5/NUSAP1/SNX9/RHOA/VPS4A/ARF1/SNX18/EXOC5/BBS4/NUP62/EXOC1/CEP55/WNK1/CHMP2A/CHMP4B/EXOC7/LZTS2/RHOC/VPS4B/POLDIP2/CHMP4A/CHMP6/STAMBP/CHMP1A/CHMP3/EXOC4/EXOC8/SON/SPAST/RACGAP1/CHMP1B/USP8/APC/PDCD6IP/CFL1/ARL3/MAP9/KLHDC8B/ECT2/CHMP2B/STMN1/AURKB/IQGAP3/TTC19/RAB35/EXOC3/CHM…	4.73933e-10	1	p3_4.73933363689725e-10	p0_1
GO:0000288	nuclear-transcribed mRNA catabolic process, deadenylation-dependent decay	62	0.198039	0.644383	0.990698	1	0.883684	5614	tags=27%, list=28%, signal=20%	ZFP36/EXOSC2/AGO2/EXOSC9/HNRNPD/ZFP36L2/TNRC6A/EXOSC8/SYNCRIP/DHX9/PDE12/EXOSC3/IGF2BP1/YBX1/DCPS/CAPRIN1/HNRNPU	nuclear-transcribed mRNA catabolic process, deadenylation-dependent decay	63	-0.273351	-0.946123	0.572127	0.907327	0.845213	5749	tags=35%, list=27%, signal=25%	TNRC6A/ZFP36/DCP1A/LSM1/SAMD4B/DIS3/CNOT7/PAN3/DCP1B/CNOT6L/TNRC6C/CSDE1/ZFP36L1/RC3H2/NANOS3/BTG2/NT5C3B/PAIP1/IGF2BP1/PNLDC1/ZFP36L2/RC3H1	nuclear-transcribed mRNA catabolic process, deadenylation-dependent decay	63	0.195518	0.736431	0.942857	1	1	422	tags=5%, list=2%, signal=5%	CPEB3/TENT4B/NANOS3	0.572127	0.990698	p1_0.572127139364303	p3_0.990697674418605
GO:0000289	nuclear-transcribed mRNA poly(A) tail shortening	29	0.157668	0.445027	0.995708	1	0.883684	17034	tags=100%, list=84%, signal=16%	ZFP36/AGO2/TNRC6A/MLH1/TNRC6B/CNOT6/TNRC6C/SAMD4B/CNOT7/TOB1/CNOT3/CNOT4/CNOT1/PAN3/CNOT11/SAMD4A/PARN/CNOT2/CNOT10/POLR2G/EIF4ENIF1/PAN2/PABPC1/TNKS1BP1/CNOT6L/CNOT8/CPEB3/PNLDC1/BTG2	nuclear-transcribed mRNA poly(A) tail shortening	29	-0.351542	-1.06882	0.352688	0.810826	0.755318	6784	tags=48%, list=32%, signal=33%	CNOT2/CNOT10/CNOT8/CNOT6/TNRC6B/TNRC6A/ZFP36/SAMD4B/CNOT7/PAN3/CNOT6L/TNRC6C/BTG2/PNLDC1	nuclear-transcribed mRNA poly(A) tail shortening	31	0.275649	0.872653	0.683128	1	1	288	tags=6%, list=2%, signal=6%	CPEB3/TENT4B	0.352688	0.995708	p1_0.352688172043011	p3_0.995708154506438
GO:0000290	deadenylation-dependent decapping of nuclear-transcribed mRNA	11	-0.266554	-0.594102	0.929688	0.985171	0.870581	14832	tags=55%, list=73%, signal=15%	DCP1A/DCP1B/EIF4ENIF1/LSM1/PATL1/NOCT	deadenylation-dependent decapping of nuclear-transcribed mRNA	10	-0.220497	-0.505528	0.976744	0.993155	0.925165	5455	tags=40%, list=26%, signal=30%	DCP1A/LSM1/CNOT7/DCP1B	deadenylation-dependent decapping of nuclear-transcribed mRNA	11	-0.321629	-0.67455	0.847589	1	1	783	tags=45%, list=4%, signal=44%	CNOT7/LSM1/DCP2/DCP1A/NOCT	0.847589	0.976744	p0_0.847589424572317	p1_0.976744186046512
GO:0000291	nuclear-transcribed mRNA catabolic process, exonucleolytic	17	0.367819	0.909818	0.6	0.838099	0.740615	7453	tags=47%, list=37%, signal=30%	EXOSC2/EXOSC9/EXOSC8/EXOSC3/DCPS/DIS3L2/CNOT6/CNOT7	nuclear-transcribed mRNA catabolic process, exonucleolytic	17	0.505914	1.3049	0.132827	0.628143	0.585141	4290	tags=41%, list=20%, signal=33%	EXOSC4/DIS3L2/EXOSC5/EXOSC9/DCPS/DCP2/EXOSC3	nuclear-transcribed mRNA catabolic process, exonucleolytic	17	-0.396298	-0.908869	0.59233	1	1	8137	tags=65%, list=45%, signal=36%	EXOSC8/DIS3L2/DCPS/CNOT8/CNOT7/EXOSC9/DCP2/EXOSC3/EXOSC4/EXOSC2/CNOT6	0.132827	0.6	p1_0.132827324478178	p3_0.6
GO:0000302	response to reactive oxygen species	181	-0.330662	-1.21311	0.0958678	0.395992	0.349932	2187	tags=14%, list=11%, signal=12%	NCF1/TPM1/PAWR/BTK/TACR1/BNIP3/ERN1/SESN2/FYN/TNFAIP3/TRPM2/CRYAB/PDGFD/MB/IL18RAP/HBA2/SOD2/PTPRN/GPR37L1/GCH1/EDN1/MT3/IL6/HBB/IL1A	response to reactive oxygen species	189	-0.225832	-0.943129	0.603325	0.912753	0.850267	2534	tags=14%, list=12%, signal=12%	TOP2B/ERCC6L2/AXL/GPR37/GPX1/FKBP1B/S100A7/ANKZF1/EGFR/PRKCD/MIR17/STAT1/PTPRK/SMPD3/FOXO3/TXNIP/BMP7/ADAM9/CD36/SOD2/EDN1/SESN2/STK26/MAP3K5/PTK2B/PDK2/BNIP3	response to reactive oxygen species	174	-0.315323	-0.9854	0.518047	1	1	1908	tags=7%, list=11%, signal=6%	TACR1/FOSL1/HBB/STK26/HBA1/MAPT/HBA2/APOD/IL6/SCGB1A1/HP/GPX1	0.0958678	0.603325	p3_0.0958677685950413	p1_0.60332541567696
GO:0000303	response to superoxide	23	-0.502794	-1.3372	0.117871	0.429925	0.379918	748	tags=35%, list=4%, signal=34%	NFE2L2/MPO/ERCC6/FBLN5/MB/SOD2/GCH1/MT3	response to superoxide	24	0.292153	0.824613	0.724138	0.946377	0.88159	3181	tags=25%, list=15%, signal=21%	FANCC/MPO/DHFR/NOS3/GCH1/PRDX1	response to superoxide	22	0.356148	1.05553	0.377622	1	1	1464	tags=14%, list=8%, signal=13%	MB/UCP3/ERCC6	0.117871	0.724138	p3_0.11787072243346	p1_0.724137931034483
GO:0000305	response to oxygen radical	24	-0.49792	-1.33172	0.125725	0.442548	0.391073	748	tags=33%, list=4%, signal=32%	NFE2L2/MPO/ERCC6/FBLN5/MB/SOD2/GCH1/MT3	response to oxygen radical	25	0.321424	0.91349	0.601093	0.912753	0.850267	3181	tags=28%, list=15%, signal=24%	FANCC/MPO/DHFR/NOS3/TXNRD2/GCH1/PRDX1	response to oxygen radical	23	0.346506	1.04271	0.383513	1	1	1464	tags=13%, list=8%, signal=12%	MB/UCP3/ERCC6	0.125725	0.601093	p3_0.125725338491296	p1_0.601092896174863
GO:0000338	protein deneddylation	11	0.534541	1.18504	0.242857	0.585714	0.517586	6533	tags=55%, list=32%, signal=37%	COPS6/COPS4/GPS1/COPS8/COPS7B/COPS3	protein deneddylation	11	0.664251	1.53787	0.0206307	0.23636	0.220179	2976	tags=36%, list=14%, signal=31%	GPS1/COPS7A/TOR1A/COPS3	protein deneddylation	11	0.381263	0.949194	0.481894	1	1	11212	tags=100%, list=62%, signal=38%	SENP8/COPS8/TOR1A/COPS3/GPS1/COPS2/COPS7A/COPS7B/COPS6/COPS5/COPS4	0.0206307	0.481894	p1_0.0206306924897693	p0_0.481894150417827
GO:0000375	RNA splicing, via transesterification reactions	297	0.224643	0.907772	0.814721	0.937341	0.828314	7663	tags=53%, list=38%, signal=33%	RNU1-4/RNU6-9/RBM3/DDX39A/RBMY1F/RBM14/SFPQ/HNRNPA2B1/RBMX/PTBP2/HNRNPH1/RNU2-1/SRSF2/KHDRBS3/SNRPA1/GEMIN6/SRSF1/PPIH/KHDRBS2/RNU4-2/PSIP1/SNRPA/HNRNPA3/TRA2B/WDR77/SRSF3/SRPK1/HNRNPM/EXOSC10/LSM2/SRRM1/HNRNPL/HNRNPA1/LSM5/LSM4/SRSF7/RBM25/RBM15/DAZAP1/RBM44/HNRNPH3/KHSRP/U2AF2/PTBP1/PRPF4/PRMT7/GCFC2/SNRNP25/HNRNPA1L2/SMN2/LSM3/SYNCRIP/TRA2A/HNRNPUL1/DHX9/SNRPB/SNRPE/CELF1/SNRPF/DDX46/CWF19L1/D…	RNA splicing, via transesterification reactions	293	0.335535	1.42927	0.00205945	0.0756602	0.0704807	6225	tags=41%, list=30%, signal=29%	SNIP1/PHF5A/DBR1/SNRPA/SRSF6/XAB2/WDR77/RNU6ATAC/DDX39B/PNN/U2AF2/SNRPA1/DDX39A/CWC25/JMJD6/MAGOH/RBMXL2/METTL3/PRMT5/RBM15/RBM23/SF3B1/RBM47/SF3A2/SNRNP70/PUF60/PPIH/SYNCRIP/GEMIN5/DHX35/SNRPB2/C1QBP/EIF4A3/TRA2B/ISY1/GEMIN8/RBMX/HNRNPC/AAR2/RBM39/SRSF10/RBM4B/CWF19L1/CELF1/FRG1/PRMT7/NPM1/PPIE/PTBP1/SF3A3/HNRNPM/SNRPB/PRPF31/SRSF2/HNRNPU/SRPK3/TGS1/PRPF3/DCPS/HNRNPK/SYF2/DHX38/PRPF4/SRSF6/DDX41…	RNA splicing, via transesterification reactions	284	-0.0702759	-0.224505	1	1	1	8390	tags=42%, list=46%, signal=23%	SRRM1/SLU7/PRPF38A/CDC40/RBM41/DHX15/SCAF11/PPIL1/HTATSF1/CWC15/EIF1/GEMIN7/SF3B4/FRA10AC1/DDX5/DNAJC17/RBM23/SNRNP35/SRSF5/CD2BP2/HNRNPR/NCL/PTBP2/HNRNPM/DCPS/USP4/SFPQ/SF3B2/IK/RBM8A/ZCRB1/RNPS1/SF3B6/HNRNPA3/SNRPD1/PRPF31/UPF3A/C9orf78/SON/WDR77/SYNCRIP/SNRPD3/AAR2/HNRNPA1L2/SNRNP25/RBPMS/NUP98/CELF1/C1QBP/SRSF12/DDX46/SNRPC/RBM6/GPKOW/PRPF3/TRA2B/PUF60/SNRNP27/RBMX/LSM1/HNRNPA2B1/SRSF4/LSM3/R…	0.00205945	1	p1_0.00205944937744932	p0_1
GO:0000377	RNA splicing, via transesterification reactions with bulged adenosine as nucleophile	293	0.224223	0.903561	0.82732	0.943338	0.833613	7663	tags=53%, list=38%, signal=33%	RNU1-4/RNU6-9/RBM3/DDX39A/RBMY1F/RBM14/SFPQ/HNRNPA2B1/RBMX/PTBP2/HNRNPH1/RNU2-1/SRSF2/KHDRBS3/SNRPA1/GEMIN6/SRSF1/PPIH/KHDRBS2/RNU4-2/PSIP1/SNRPA/HNRNPA3/TRA2B/WDR77/SRSF3/SRPK1/HNRNPM/EXOSC10/LSM2/SRRM1/HNRNPL/HNRNPA1/LSM5/LSM4/SRSF7/RBM25/RBM15/DAZAP1/RBM44/HNRNPH3/U2AF2/PTBP1/PRPF4/PRMT7/GCFC2/SNRNP25/HNRNPA1L2/SMN2/LSM3/SYNCRIP/TRA2A/HNRNPUL1/DHX9/SNRPB/SNRPE/CELF1/SNRPF/DDX46/CWF19L1/DHX15/R…	RNA splicing, via transesterification reactions with bulged adenosine as nucleophile	289	0.337485	1.4357	0.000824359	0.0420491	0.0391705	6225	tags=41%, list=30%, signal=29%	SNIP1/PHF5A/DBR1/SNRPA/SRSF6/XAB2/WDR77/RNU6ATAC/DDX39B/PNN/U2AF2/SNRPA1/DDX39A/CWC25/JMJD6/MAGOH/RBMXL2/METTL3/PRMT5/RBM15/RBM23/SF3B1/RBM47/SF3A2/SNRNP70/PUF60/PPIH/SYNCRIP/GEMIN5/DHX35/SNRPB2/C1QBP/EIF4A3/TRA2B/ISY1/GEMIN8/RBMX/HNRNPC/AAR2/RBM39/SRSF10/RBM4B/CWF19L1/CELF1/FRG1/PRMT7/NPM1/PPIE/PTBP1/SF3A3/HNRNPM/SNRPB/PRPF31/SRSF2/HNRNPU/SRPK3/TGS1/PRPF3/DCPS/HNRNPK/SYF2/DHX38/PRPF4/SRSF6/DDX41…	RNA splicing, via transesterification reactions with bulged adenosine as nucleophile	280	-0.0747663	-0.238891	1	1	1	8413	tags=42%, list=46%, signal=23%	SRRM1/SLU7/PRPF38A/CDC40/RBM41/DHX15/SCAF11/PPIL1/HTATSF1/CWC15/EIF1/GEMIN7/SF3B4/FRA10AC1/DDX5/DNAJC17/RBM23/SNRNP35/SRSF5/CD2BP2/HNRNPR/NCL/PTBP2/HNRNPM/DCPS/USP4/SFPQ/SF3B2/IK/RBM8A/ZCRB1/RNPS1/SF3B6/HNRNPA3/SNRPD1/PRPF31/UPF3A/C9orf78/SON/WDR77/SYNCRIP/SNRPD3/AAR2/HNRNPA1L2/SNRNP25/RBPMS/NUP98/CELF1/C1QBP/SRSF12/DDX46/SNRPC/RBM6/GPKOW/PRPF3/TRA2B/PUF60/SNRNP27/RBMX/HNRNPA2B1/SRSF4/LSM3/RNPC3/…	0.000824359	1	p1_0.000824358579979815	p0_1
GO:0000380	alternative mRNA splicing, via spliceosome	68	-0.355814	-1.13444	0.245045	0.588029	0.519632	3266	tags=15%, list=16%, signal=12%	CELF5/WTAP/RBFOX3/RBFOX1/SRRM4/CELF6/RBM11/RBM20/SRSF12/NOVA2	alternative mRNA splicing, via spliceosome	71	0.200911	0.713727	0.951557	0.990488	0.92268	5887	tags=38%, list=28%, signal=27%	SRSF6/MAGOH/RBM15/RBM47/PUF60/TRA2B/RBMX/CELF1/PTBP1/HNRNPM/SRSF2/HNRNPU/SRSF6/HNRNPUL1/NCBP1/RBM20/KHDRBS2/MYOD1/SRSF9/SFPQ/RBM8A/RBFOX1/CELF5/RBM15B/HNRNPUL2/KHDRBS1/DDX5	alternative mRNA splicing, via spliceosome	64	-0.254272	-0.719765	0.847356	1	1	7293	tags=39%, list=40%, signal=23%	RBPMS/CELF1/SRSF12/TRA2B/PUF60/RBMX/RBM7/NCBP1/THRAP3/RBM4/WTAP/PQBP1/CELF2/RBFOX2/RBPMS2/NSRP1/RBM47/RBM15/RBM15B/KHDRBS2/RBM11/RBM20/CELF4/NOVA1/RBM24	0.245045	0.951557	p3_0.245045045045045	p1_0.951557093425606
GO:0000381	regulation of alternative mRNA splicing, via spliceosome	50	-0.44821	-1.36542	0.0637523	0.330844	0.292362	3266	tags=20%, list=16%, signal=17%	CELF5/WTAP/RBFOX3/RBFOX1/SRRM4/CELF6/RBM11/RBM20/SRSF12/NOVA2	regulation of alternative mRNA splicing, via spliceosome	53	0.245207	0.8203	0.82	0.966142	0.900001	5887	tags=39%, list=28%, signal=28%	SRSF6/MAGOH/RBM15/RBM47/PUF60/TRA2B/RBMX/CELF1/PTBP1/SRSF2/HNRNPU/SRSF6/RBM20/KHDRBS2/MYOD1/RBM8A/RBFOX1/CELF5/RBM15B/KHDRBS1/DDX5	regulation of alternative mRNA splicing, via spliceosome	47	-0.310184	-0.844462	0.646018	1	1	7293	tags=49%, list=40%, signal=29%	RBPMS/CELF1/SRSF12/TRA2B/PUF60/RBMX/RBM7/THRAP3/RBM4/WTAP/CELF2/RBFOX2/RBPMS2/NSRP1/RBM47/RBM15/RBM15B/KHDRBS2/RBM11/RBM20/CELF4/NOVA1/RBM24	0.0637523	0.82	p3_0.063752276867031	p1_0.82
GO:0000387	spliceosomal snRNP assembly	42	0.275365	0.847147	0.714286	0.893394	0.789478	7534	tags=57%, list=37%, signal=36%	RNU6-9/GEMIN6/RNU4-2/WDR77/LSM2/LSM4/PRMT7/SMN2/SNRPB/SNRPE/SNRPF/SNRPD1/GEMIN5/GEMIN4/SRSF10/SNRPC/PRPF31/SNRPD3/PRPF8/SART1/PRPF3/SNRPG/PRMT5/GEMIN2	spliceosomal snRNP assembly	40	0.56847	1.80343	0.000483033	0.0292283	0.0272273	4458	tags=42%, list=21%, signal=34%	WDR77/RNU6ATAC/PRMT5/GEMIN5/GEMIN8/AAR2/SRSF10/PRMT7/SNRPB/PRPF31/TGS1/PRPF3/DDX20/SNRPC/PRPF19/GEMIN4/SNRPD1	spliceosomal snRNP assembly	39	0.225173	0.760381	0.85022	1	1	14044	tags=100%, list=78%, signal=23%	SMN1/SMN2/PRMT7/GEMIN6/PRPF8/LSM2/PRPF6/SART1/SNRPE/SART3/GEMIN2/CLNS1A/PRPF19/SRSF10/SNRPD2/TSSC4/COIL/STRAP/SNRPF/GEMIN8/SNRPB/TGS1/PRMT5/GEMIN7/CD2BP2/USP4/SNRPD1/PRPF31/WDR77/SNRPD3/AAR2/SRSF12/SNRPC/PRPF3/SNRPG/LSM4/GEMIN4/GEMIN5/DDX20	0.000483033	0.85022	p1_0.000483033428082389	p0_0.850220264317181
GO:0000394	RNA splicing, via endonucleolytic cleavage and ligation	13	-0.29008	-0.672825	0.878095	0.964845	0.852618	1724	tags=38%, list=9%, signal=35%	ZBTB8OS/C2orf49/TSEN34/TRPT1/ERN1	RNA splicing, via endonucleolytic cleavage and ligation	13	0.449252	1.09362	0.347092	0.80657	0.751353	4080	tags=36%, list=19%, signal=29%	FAM98A/TSEN54/CLP1/TSEN2/FAM98B	RNA splicing, via endonucleolytic cleavage and ligation	14	-0.262568	-0.572899	0.940476	1	1	6590	tags=57%, list=36%, signal=36%	C2orf49/ERN1/TSEN15/FAM98B/DDX1/RTCB/FAM98A/TSEN54	0.347092	0.940476	p1_0.347091932457786	p0_0.94047619047619
GO:0000395	mRNA 5'-splice site recognition	12	-0.412443	-0.946086	0.531073	0.792805	0.70059	1473	tags=25%, list=7%, signal=23%	WEE2-AS1/RNU11/SRSF12	mRNA 5'-splice site recognition	10	-0.367897	-0.84347	0.674419	0.929311	0.865691	3042	tags=60%, list=14%, signal=51%	SRSF12/PSIP1/SFSWAP/PRPF39/WEE2-AS1/SRSF1	mRNA 5'-splice site recognition	6	0.385023	0.78092	0.708543	1	1	11142	tags=100%, list=62%, signal=39%	SRSF1/PSIP1/PRPF39/SFSWAP/SRSF12/SNRPC	0.531073	0.708543	p3_0.531073446327684	p0_0.708542713567839
GO:0000398	mRNA splicing, via spliceosome	293	0.224223	0.903561	0.82732	0.943338	0.833613	7663	tags=53%, list=38%, signal=33%	RNU1-4/RNU6-9/RBM3/DDX39A/RBMY1F/RBM14/SFPQ/HNRNPA2B1/RBMX/PTBP2/HNRNPH1/RNU2-1/SRSF2/KHDRBS3/SNRPA1/GEMIN6/SRSF1/PPIH/KHDRBS2/RNU4-2/PSIP1/SNRPA/HNRNPA3/TRA2B/WDR77/SRSF3/SRPK1/HNRNPM/EXOSC10/LSM2/SRRM1/HNRNPL/HNRNPA1/LSM5/LSM4/SRSF7/RBM25/RBM15/DAZAP1/RBM44/HNRNPH3/U2AF2/PTBP1/PRPF4/PRMT7/GCFC2/SNRNP25/HNRNPA1L2/SMN2/LSM3/SYNCRIP/TRA2A/HNRNPUL1/DHX9/SNRPB/SNRPE/CELF1/SNRPF/DDX46/CWF19L1/DHX15/R…	mRNA splicing, via spliceosome	289	0.337485	1.4357	0.000824359	0.0420491	0.0391705	6225	tags=41%, list=30%, signal=29%	SNIP1/PHF5A/DBR1/SNRPA/SRSF6/XAB2/WDR77/RNU6ATAC/DDX39B/PNN/U2AF2/SNRPA1/DDX39A/CWC25/JMJD6/MAGOH/RBMXL2/METTL3/PRMT5/RBM15/RBM23/SF3B1/RBM47/SF3A2/SNRNP70/PUF60/PPIH/SYNCRIP/GEMIN5/DHX35/SNRPB2/C1QBP/EIF4A3/TRA2B/ISY1/GEMIN8/RBMX/HNRNPC/AAR2/RBM39/SRSF10/RBM4B/CWF19L1/CELF1/FRG1/PRMT7/NPM1/PPIE/PTBP1/SF3A3/HNRNPM/SNRPB/PRPF31/SRSF2/HNRNPU/SRPK3/TGS1/PRPF3/DCPS/HNRNPK/SYF2/DHX38/PRPF4/SRSF6/DDX41…	mRNA splicing, via spliceosome	280	-0.0747663	-0.238891	1	1	1	8413	tags=42%, list=46%, signal=23%	SRRM1/SLU7/PRPF38A/CDC40/RBM41/DHX15/SCAF11/PPIL1/HTATSF1/CWC15/EIF1/GEMIN7/SF3B4/FRA10AC1/DDX5/DNAJC17/RBM23/SNRNP35/SRSF5/CD2BP2/HNRNPR/NCL/PTBP2/HNRNPM/DCPS/USP4/SFPQ/SF3B2/IK/RBM8A/ZCRB1/RNPS1/SF3B6/HNRNPA3/SNRPD1/PRPF31/UPF3A/C9orf78/SON/WDR77/SYNCRIP/SNRPD3/AAR2/HNRNPA1L2/SNRNP25/RBPMS/NUP98/CELF1/C1QBP/SRSF12/DDX46/SNRPC/RBM6/GPKOW/PRPF3/TRA2B/PUF60/SNRNP27/RBMX/HNRNPA2B1/SRSF4/LSM3/RNPC3/…	0.000824359	1	p1_0.000824358579979815	p0_1
GO:0000413	protein peptidyl-prolyl isomerization	22	0.33234	0.875828	0.633333	0.853384	0.754122	5473	tags=36%, list=27%, signal=27%	FKBP5/PPIAL4E/PPIAL4A/PPIH/FKBP1A/NKTR/PPIAL4F/PIN1	protein peptidyl-prolyl isomerization	18	0.297273	0.778718	0.790476	0.963242	0.8973	3938	tags=33%, list=19%, signal=27%	PPIH/FKBP5/PPIE/PPID/PPIC/PPIB	protein peptidyl-prolyl isomerization	19	0.309572	0.875206	0.623288	1	1	6166	tags=37%, list=34%, signal=24%	FKBP5/PPIL3/PPIAL4G/PPWD1/PPIH/FKBP1B/PPIC	0.623288	0.790476	p0_0.623287671232877	p1_0.79047619047619
GO:0000422	autophagy of mitochondrion	94	-0.339471	-1.14345	0.214035	0.556795	0.492031	5375	tags=29%, list=27%, signal=21%	GABARAPL2/WDR45/SLC25A4/ATG9A/GABARAP/TOMM7/HAX1/CISD2/ULK1/SREBF1/ATG9B/ATG13/ATP13A2/SREBF2/OPTN/WIPI1/RNF41/BNIP3L/HK2/GABARAPL1/MAP1LC3B/SQSTM1/TP53/CERS1/MAP1LC3B2/BNIP3/NOD2	autophagy of mitochondrion	93	-0.259101	-0.979545	0.489362	0.867166	0.807801	6279	tags=41%, list=30%, signal=29%	RB1CC1/PARK7/ATG12/SNX7/AMBRA1/WDR45/SREBF2/ATG13/MAP1LC3B2/ATG2A/MAP1LC3A/CERS1/ATG5/SLC25A4/FBXW7/GABARAP/HUWE1/HDAC6/ULK2/ATG2B/GABARAPL1/GABARAPL2/TP53/SREBF1/LRBA/WIPI1/MAP1LC3B/OGT/FZD5/HTT/SQSTM1/VPS13C/ULK1/MAP1LC3C/OPTN/BNIP3L/RNF41/BNIP3	autophagy of mitochondrion	95	-0.148944	-0.441407	1	1	1	6629	tags=27%, list=37%, signal=17%	BNIP3/FKBP8/DNM1L/FBXL4/ULK1/RB1CC1/SNX30/BECN1/HK2/SLC25A4/ATG5/WIPI1/ATG2A/ATG4A/USP36/VPS13C/SREBF2/NOD2/CERS1/RETREG1/GABARAPL1/ATG4C/FBXW7/MAP1LC3B2/FZD5/ATG9A	0.214035	1	p3_0.214035087719298	p0_1
GO:0000423	mitophagy	55	-0.384955	-1.18728	0.195298	0.531958	0.470083	2717	tags=16%, list=13%, signal=14%	SREBF2/OPTN/RNF41/BNIP3L/MAP1LC3B/SQSTM1/TP53/CERS1/NOD2	mitophagy	55	-0.281082	-0.961776	0.506944	0.874877	0.814984	5040	tags=33%, list=24%, signal=25%	CERS1/ATG5/SLC25A4/FBXW7/HUWE1/HDAC6/TP53/SREBF1/LRBA/MAP1LC3B/OGT/FZD5/HTT/SQSTM1/VPS13C/OPTN/BNIP3L/RNF41	mitophagy	57	-0.135413	-0.377797	1	1	1	4124	tags=23%, list=23%, signal=18%	BECN1/SLC25A4/ATG5/ATG4A/USP36/VPS13C/SREBF2/NOD2/CERS1/RETREG1/ATG4C/FBXW7/FZD5	0.195298	1	p3_0.195298372513562	p0_1
GO:0000447	endonucleolytic cleavage in ITS1 to separate SSU-rRNA from 5.8S rRNA and LSU-rRNA from tricistronic rRNA transcript (SSU-rRNA, 5.8S rRNA, LSU-rRNA)	10	0.611267	1.32912	0.12326	0.43892	0.387867	4961	tags=50%, list=25%, signal=38%	UTP20/RRS1/NOP9/RPP40/KRI1	endonucleolytic cleavage in ITS1 to separate SSU-rRNA from 5.8S rRNA and LSU-rRNA from tricistronic rRNA transcript (SSU-rRNA, 5.8S rRNA, LSU-rRNA)	10	0.491289	1.12004	0.327032	0.795602	0.741136	4441	tags=60%, list=21%, signal=47%	RPP40/UTP20/RCL1/RRS1/NOP9/FCF1	endonucleolytic cleavage in ITS1 to separate SSU-rRNA from 5.8S rRNA and LSU-rRNA from tricistronic rRNA transcript (SSU-rRNA, 5.8S rRNA, LSU-rRNA)	10	-0.269554	-0.558735	0.93578	1	1	13235	tags=40%, list=73%, signal=11%	ABT1/FCF1/RCL1/NOP9	0.12326	0.93578	p3_0.123260437375746	p0_0.935779816513762
GO:0000460	maturation of 5.8S rRNA	35	0.561231	1.64958	0.00970562	0.126392	0.11169	6509	tags=60%, list=32%, signal=41%	ERI1/ERI2/EXOSC2/UTP20/RRS1/EXOSC9/BOP1/EXOSC10/MPHOSPH6/NOP9/PRKDC/RPP40/EXOSC8/LAS1L/EXOSC3/NOL9/KRI1/MAK16/FTSJ3/RPF1/URB1	maturation of 5.8S rRNA	34	0.633282	1.92695	8.01864e-05	0.00738672	0.00688104	4948	tags=71%, list=24%, signal=54%	MAK16/EXOSC4/RPP40/UTP20/RCL1/NOL9/ERI1/LAS1L/RPF1/ERI3/EXOSC9/BOP1/RRS1/RRP15/URB1/FTSJ3/NOP9/PES1/EIF6/EXOSC3/NSA2/FCF1/WDR12/ERI2	maturation of 5.8S rRNA	36	0.218221	0.713168	0.894737	1	1	14169	tags=100%, list=78%, signal=22%	ERI2/BOP1/URB1/MPHOSPH6/RPP40/MTREX/RRS1/NSA2/PRKDC/FTSJ3/EIF6/ERI3/EXOSC7/RPS21/UTP20/KRI1/NOP14/NOL9/ABT1/PES1/EXOSC8/RPF1/LAS1L/FCF1/ERI1/RCL1/EXOSC9/MAK16/C1D/RRP15/EXOSC3/EXOSC4/EXOSC10/EXOSC2/NOP9/WDR12	8.01864e-05	0.894737	p1_8.01863800914827e-05	p0_0.894736842105263
GO:0000462	maturation of SSU-rRNA from tricistronic rRNA transcript (SSU-rRNA, 5.8S rRNA, LSU-rRNA)	32	0.349032	1.00791	0.458696	0.754701	0.666917	7053	tags=44%, list=35%, signal=29%	UTP20/RRS1/NOP9/RPP40/HEATR1/TSR2/RRP36/KRI1/DHX37/ERCC2/TBL3/UTP23/NOL10/WDR43	maturation of SSU-rRNA from tricistronic rRNA transcript (SSU-rRNA, 5.8S rRNA, LSU-rRNA)	32	0.511191	1.54127	0.0268699	0.281086	0.261843	4441	tags=53%, list=21%, signal=42%	RPP40/BYSL/UTP20/RCL1/UTP3/WDR46/ERCC2/PWP2/WDR43/DHX37/RRS1/HEATR1/RRP36/DCAF13/NOP9/UTP6/FCF1	maturation of SSU-rRNA from tricistronic rRNA transcript (SSU-rRNA, 5.8S rRNA, LSU-rRNA)	34	-0.122594	-0.315543	1	1	1	8415	tags=44%, list=46%, signal=24%	UTP23/ABT1/GTF2H5/NOL10/FCF1/RCL1/DCAF13/BMS1/NGDN/TSR2/ERCC2/NOP9/UTP3/HEATR1/DHX37	0.0268699	1	p1_0.0268698641017835	p0_1
GO:0000463	maturation of LSU-rRNA from tricistronic rRNA transcript (SSU-rRNA, 5.8S rRNA, LSU-rRNA)	16	0.268119	0.659558	0.922131	0.984685	0.870151	6809	tags=38%, list=34%, signal=25%	BOP1/NOL9/FTSJ3/RPL7L1/URB1/ZNHIT6	maturation of LSU-rRNA from tricistronic rRNA transcript (SSU-rRNA, 5.8S rRNA, LSU-rRNA)	16	0.669232	1.70979	0.0053659	0.124039	0.115547	4710	tags=69%, list=22%, signal=53%	GTPBP4/NOL9/RPF2/NIFK/RBM34/BOP1/URB1/FTSJ3/DDX18/PES1/WDR12	maturation of LSU-rRNA from tricistronic rRNA transcript (SSU-rRNA, 5.8S rRNA, LSU-rRNA)	16	0.21798	0.591632	0.957792	1	1	14169	tags=100%, list=78%, signal=22%	BOP1/URB1/ZNHIT3/NIFK/FTSJ3/RPL35/RPL7/RPF2/GTPBP4/RBM34/NOL9/PES1/DDX18/RPL7L1/ZNHIT6/WDR12	0.0053659	0.957792	p1_0.00536589635598807	p0_0.957792207792208
GO:0000466	maturation of 5.8S rRNA from tricistronic rRNA transcript (SSU-rRNA, 5.8S rRNA, LSU-rRNA)	25	0.60988	1.67293	0.0105786	0.131663	0.116349	4961	tags=56%, list=25%, signal=42%	ERI1/ERI2/EXOSC2/UTP20/RRS1/EXOSC9/BOP1/EXOSC10/NOP9/RPP40/EXOSC8/EXOSC3/NOL9/KRI1	maturation of 5.8S rRNA from tricistronic rRNA transcript (SSU-rRNA, 5.8S rRNA, LSU-rRNA)	24	0.591681	1.67004	0.00494027	0.118614	0.110494	4948	tags=71%, list=24%, signal=54%	RPP40/UTP20/RCL1/NOL9/ERI1/ERI3/EXOSC9/BOP1/RRS1/URB1/FTSJ3/NOP9/PES1/EXOSC3/FCF1/WDR12/ERI2	maturation of 5.8S rRNA from tricistronic rRNA transcript (SSU-rRNA, 5.8S rRNA, LSU-rRNA)	25	0.218088	0.659404	0.927007	1	1	14169	tags=100%, list=78%, signal=22%	ERI2/BOP1/URB1/RPP40/RRS1/FTSJ3/ERI3/EXOSC7/RPS21/UTP20/KRI1/NOP14/NOL9/ABT1/PES1/EXOSC8/FCF1/ERI1/RCL1/EXOSC9/EXOSC3/EXOSC10/EXOSC2/NOP9/WDR12	0.00494027	0.927007	p1_0.00494027091030251	p0_0.927007299270073
GO:0000470	maturation of LSU-rRNA	28	0.26559	0.745374	0.855932	0.955324	0.844205	14855	tags=100%, list=73%, signal=27%	BOP1/LAS1L/NOL9/MAK16/NOP2/FTSJ3/RPF1/RPL7L1/URB1/ZNHIT6/RRP15/WDR12/NHP2/RPF2/EIF6/NSA2/RBM34/RPL35/GTPBP4/PES1/SNU13/DDX18/NIFK/ZNHIT3/RSL1D1/RPL7A/RPL10A/RPL7	maturation of LSU-rRNA	27	0.703128	2.0343	4.45292e-05	0.00485703	0.00452452	4710	tags=70%, list=22%, signal=55%	MAK16/GTPBP4/NOL9/LAS1L/RPF2/RPF1/NIFK/RBM34/BOP1/RSL1D1/RRP15/URB1/NOP2/FTSJ3/DDX18/PES1/EIF6/NSA2/WDR12	maturation of LSU-rRNA	28	-0.17245	-0.430142	0.995896	1	1	8146	tags=39%, list=45%, signal=22%	PES1/RPF1/LAS1L/NHP2/DDX18/RPL7L1/MAK16/RRP15/ZNHIT6/WDR12/NOP2	4.45292e-05	0.995896	p1_4.45292205794962e-05	p0_0.995896032831737
GO:0000479	endonucleolytic cleavage of tricistronic rRNA transcript (SSU-rRNA, 5.8S rRNA, LSU-rRNA)	17	0.580962	1.43704	0.06875	0.341616	0.301881	6412	tags=53%, list=32%, signal=36%	UTP20/RRS1/BOP1/NOP9/RPP40/NOL9/KRI1/TBL3/UTP23	endonucleolytic cleavage of tricistronic rRNA transcript (SSU-rRNA, 5.8S rRNA, LSU-rRNA)	17	0.480788	1.2401	0.185958	0.686034	0.639069	2500	tags=35%, list=12%, signal=31%	RPP40/UTP20/RCL1/NOL9/BOP1/RRS1	endonucleolytic cleavage of tricistronic rRNA transcript (SSU-rRNA, 5.8S rRNA, LSU-rRNA)	17	0.22606	0.617819	0.939597	1	1	14023	tags=100%, list=77%, signal=23%	BOP1/SDE2/RPP40/RRS1/RPS21/UTP20/TBL3/KRI1/TSR1/NOP14/NOL9/UTP23/ABT1/FCF1/RCL1/BMS1/NOP9	0.06875	0.939597	p3_0.06875	p0_0.939597315436242
GO:0000491	small nucleolar ribonucleoprotein complex assembly	11	0.311442	0.690442	0.873469	0.963372	0.851317	13924	tags=100%, list=69%, signal=31%	RUVBL2/RUVBL1/ZNHIT6/NUFIP1/TAF9/NAF1/PIH1D2/SHQ1/SNU13/ZNHIT3/PIH1D1	small nucleolar ribonucleoprotein complex assembly	10	-0.274626	-0.62963	0.92389	0.98361	0.916273	1073	tags=30%, list=5%, signal=28%	TAF9/ZNHIT3/PIH1D1	small nucleolar ribonucleoprotein complex assembly	11	-0.311495	-0.653296	0.870918	1	1	12476	tags=100%, list=69%, signal=31%	TAF9/NAF1/RUVBL2/RUVBL1/SNU13/PIH1D1/SHQ1/PIH1D2/ZNHIT6/NUFIP1	0.870918	0.92389	p0_0.870917573872473	p1_0.923890063424947
GO:0000578	embryonic axis specification	34	-0.290014	-0.829502	0.740331	0.904125	0.798962	2000	tags=21%, list=10%, signal=19%	TDRD5/WT1/DCANP1/LHX1/RIPPLY1/PCSK6/NRARP	embryonic axis specification	39	0.401537	1.27122	0.138434	0.639659	0.595869	4150	tags=33%, list=20%, signal=27%	LHX1/RIPPLY1/STIL/GDF3/PTCH1/TDRKH/PCSK6/FRS2/HOXD8/TDRD5/MESP2/WNT7A/TDRD6	embryonic axis specification	28	-0.397933	-0.992566	0.443228	1	1	2471	tags=29%, list=14%, signal=25%	TDRD6/PCSK6/PTCH1/FZD5/WNT5A/COBL/CXXC4/CHRDL1	0.138434	0.740331	p1_0.138433515482696	p3_0.740331491712707
GO:0000712	resolution of meiotic recombination intermediates	14	0.603361	1.42308	0.0759754	0.357155	0.315612	3325	tags=57%, list=16%, signal=48%	TOP2A/EME1/HFM1/FANCM/RMI1/ANKLE1/EME2/SLX4	resolution of meiotic recombination intermediates	14	0.246913	0.609146	0.944444	0.98832	0.920661	3173	tags=21%, list=15%, signal=18%	FANCM/MLH1/HFM1	resolution of meiotic recombination intermediates	12	0.305596	0.780567	0.715517	1	1	2117	tags=25%, list=12%, signal=22%	CENPS/TEX11/CENPX	0.0759754	0.944444	p3_0.0759753593429158	p1_0.944444444444444
GO:0000722	telomere maintenance via recombination	14	0.634558	1.49666	0.0533881	0.31496	0.278325	5608	tags=50%, list=28%, signal=36%	XRCC3/BRCA2/RAD51/RAD51D/XRCC1/ERCC1/SMC5	telomere maintenance via recombination	14	0.263651	0.650438	0.90613	0.978621	0.911626	3441	tags=21%, list=16%, signal=18%	RAD51D/TERF2/RAD51	telomere maintenance via recombination	14	-0.270761	-0.590773	0.925595	1	1	4329	tags=21%, list=24%, signal=16%	RAD51C/RAD51/RAD50	0.0533881	0.925595	p3_0.053388090349076	p0_0.925595238095238
GO:0000723	telomere maintenance	149	0.442491	1.65935	0.000391017	0.0136391	0.0120527	6213	tags=47%, list=31%, signal=33%	EXO1/AURKB/NEK2/CCNE2/BLM/RECQL4/XRCC3/BRCA2/RAD51/FEN1/DNA2/PIF1/HUS1B/SLF1/DCLRE1B/WRAP53/RTEL1/EID3/HNRNPA2B1/PCNA/NSMCE4A/SLX1A/HNRNPD/RAD51D/PARP1/RPA3/MAD2L2/TELO2/SLX4/EXOSC10/UCHL5/HNRNPA1/XRCC1/MAPK3/RUVBL2/SPDYA/PRKDC/GAR1/ATR/NFRKB/RPA1/CCT5/RIF1/XRCC5/SLF2/ACTL6A/MAP3K4/ACD/INO80E/ERCC1/PNKP/PKIB/RPA2/CCT2/SMC5/HNRNPU/RUVBL1/XRN1/PINX1/MAPK1/TCP1/ATRX/NAT10/XRCC6/HSP90AA1/CCT6A/PTGES3…	telomere maintenance	144	0.404486	1.58624	0.000336449	0.0223755	0.0208437	6272	tags=49%, list=30%, signal=35%	RPA2/INO80B/ACTR8/AURKB/TNKS2/CCT3/CCT2/APEX1/RAD51D/HSP90AA1/XRCC6/CCT5/NEK2/CCT7/BLM/DKC1/UCHL5/WRAP53/CCNE2/HSP90AB1/INO80C/PCNA/NAT10/GCH1/HNRNPC/CCT4/ATR/DCLRE1B/GAR1/PARP3/PINX1/ACD/RTEL1/HNRNPU/RPA1/TERF2/RAD51/RUVBL2/RECQL4/TERC/PARP1/HUS1/PKIB/MAPK1/DCP2/TNKS1BP1/SP100/MAPK3/HUS1B/POT1/TERF2IP/FEN1/TELO2/CCNE1/CCT8/CCT6A/MCRS1/ZBTB48/NOP10/NABP2/EXO1/SMC6/TFPT/PPP1R10/XRCC5/GNL3/HNRNPD/T…	telomere maintenance	154	0.181458	0.792378	0.965517	1	1	5754	tags=33%, list=32%, signal=23%	TENT4B/CCNE1/CCNE2/SLX1A/PKIB/STN1/SMARCAL1/TEN1/PML/INO80B/SLF1/SLX1B/SHLD3/UPF1/POT1/GNL3/XRCC1/PARP3/RECQL4/SHLD1/CTC1/RPA1/RAD51D/GAR1/ACTR5/NEK2/TERC/EID3/MAD2L2/ATR/SP100/TP53/NBN/NAT10/HMBOX1/SRC/TNKS/ERCC1/PIF1/PPP1R10/TFIP11/INO80E/RPA2/SLF2/SMC5/ZNF365/NSMCE3/PNKP/SHLD2/ACD/MAPK3	0.000336449	0.965517	p1_0.000336448627539948	p0_0.96551724137931
GO:0000724	double-strand break repair via homologous recombination	162	0.63231	2.40451	1e-10	1.68977e-08	1.49322e-08	3413	tags=38%, list=17%, signal=32%	POLQ/BLM/RAD54L/XRCC2/UHRF1/GINS2/RAD51AP1/MCM5/GINS4/MCM4/PARPBP/MCM8/CDC45/RECQL4/FANCB/TONSL/TEX15/AUNIP/DMC1/XRCC3/CDC7/RMI2/BRCA2/TIMELESS/BRCA1/RAD51/FEN1/MMS22L/MCM3/MCM2/MCM7/GEN1/CHEK1/FANCM/FIGNL1/HUS1B/MCM6/SLF1/RMI1/FUS/RFWD3/RAD54B/WRAP53/RTEL1/ANKLE1/SFPQ/EID3/RAD21/TOPBP1/NABP1/SFR1/NSMCE4A/SLX1A/KDM4D/RAD51D/PARP1/RPA3/MAD2L2/SLX4/ACTB/NUCKS1	double-strand break repair via homologous recombination	159	0.307436	1.22503	0.0904255	0.55307	0.515208	5848	tags=36%, list=28%, signal=27%	PIAS4/RPA2/AUNIP/RECQL/SFR1/GEN1/PARPBP/FANCM/RAD54B/CDC45/FIGNL1/TOPBP1/MCM5/AP5S1/PSMD14/RAD51D/ACTR2/MCM6/PPP4C/RNF169/BLM/KHDC3L/WRAP53/KDM1A/MORF4L2/RTEL1/RPA1/UBE2N/HELB/RAD51/RUVBL2/RECQL4/CHEK1/PARP1/DMAP1/ZSWIM7/RFWD3/HUS1/MMS22L/MCM7/ERCC6/HUS1B/BRCA1/TERF2IP/KLHL15/FEN1/MCMDC2/GINS4/KDM4D/SFPQ/NABP1/ACTB/NABP2/SMC6/MAGEF1/FAN1/NUCKS1/DMC1	double-strand break repair via homologous recombination	166	0.180393	0.795262	0.971831	1	1	5593	tags=31%, list=31%, signal=21%	SLX1A/FBH1/MCM6/ERCC6/WAS/RMI2/ZFYVE26/BRCA1/RECQL5/USP51/FAN1/CDC45/SLF1/SLX1B/FANCB/RAD51B/POLL/SHLD3/MCM9/XRCC1/MRGBP/CGAS/HELB/RECQL4/SHLD1/RPA1/RAD51D/RMI1/AUNIP/POLQ/OOEP/XRCC2/ZSWIM7/EID3/MAD2L2/KDM1A/RAD54B/NBN/RFWD3/AP5Z1/SFR1/TRRAP/RPA2/SLF2/EP400/INTS3/SMC5/ZMYND8/ZNF365/RAD52/NSMCE3	1e-10	0.971831	p3_1e-10	p0_0.971830985915493
GO:0000725	recombinational repair	166	0.627601	2.38316	1e-10	1.68977e-08	1.49322e-08	3413	tags=37%, list=17%, signal=31%	POLQ/BLM/RAD54L/XRCC2/UHRF1/GINS2/RAD51AP1/MCM5/GINS4/MCM4/PARPBP/MCM8/CDC45/RECQL4/FANCB/TONSL/ZGRF1/TEX15/AUNIP/DMC1/XRCC3/CDC7/RMI2/BRCA2/TIMELESS/BRCA1/RAD51/FEN1/MMS22L/MCM3/MCM2/MCM7/GEN1/CHEK1/FANCM/FIGNL1/HUS1B/MCM6/SLF1/RMI1/FUS/RFWD3/RAD54B/WRAP53/RTEL1/ANKLE1/SFPQ/EID3/RAD21/TOPBP1/NABP1/SFR1/NSMCE4A/SLX1A/KDM4D/RAD51D/PARP1/RPA3/MAD2L2/SLX4/ACTB/NUCKS1	recombinational repair	163	0.313852	1.25811	0.0618375	0.491831	0.458161	6203	tags=40%, list=30%, signal=28%	PIAS4/RPA2/AUNIP/RECQL/SFR1/GEN1/PARPBP/FANCM/RAD54B/CDC45/FIGNL1/TOPBP1/MCM5/AP5S1/PSMD14/RAD51D/ACTR2/MCM6/PPP4C/RNF169/XRCC6/BLM/KHDC3L/WRAP53/KDM1A/MORF4L2/RTEL1/RPA1/UBE2N/HELB/RAD51/RUVBL2/RECQL4/CHEK1/PARP1/DMAP1/ZSWIM7/RFWD3/HUS1/MMS22L/MCM7/ERCC6/HUS1B/BRCA1/TERF2IP/KLHL15/FEN1/ZGRF1/MCMDC2/GINS4/KDM4D/SFPQ/NABP1/ACTB/NABP2/SMC6/MAGEF1/FAN1/NUCKS1/DMC1/XRCC5/MRGBP/ERCC5/MCM2/HTATSF1	recombinational repair	170	0.173832	0.765726	0.984615	1	1	5593	tags=30%, list=31%, signal=21%	SLX1A/FBH1/MCM6/ERCC6/WAS/RMI2/ZFYVE26/BRCA1/RECQL5/USP51/FAN1/CDC45/SLF1/SLX1B/FANCB/RAD51B/POLL/SHLD3/MCM9/XRCC1/MRGBP/CGAS/HELB/RECQL4/SHLD1/RPA1/RAD51D/RMI1/AUNIP/POLQ/OOEP/XRCC2/ZSWIM7/EID3/MAD2L2/KDM1A/RAD54B/NBN/RFWD3/AP5Z1/SFR1/TRRAP/RPA2/SLF2/EP400/INTS3/SMC5/ZMYND8/ZNF365/RAD52/NSMCE3	1e-10	0.984615	p3_1e-10	p0_0.984615384615385
GO:0000727	double-strand break repair via break-induced replication	12	0.883382	1.97577	1.41774e-05	0.000883327	0.000780583	1803	tags=83%, list=9%, signal=76%	GINS2/MCM5/GINS4/MCM4/CDC45/CDC7/MCM3/MCM2/MCM7/MCM6	double-strand break repair via break-induced replication	12	0.571666	1.36385	0.108209	0.585286	0.545218	7213	tags=75%, list=34%, signal=49%	CDC45/MCM5/MCM6/MCM7/MCMDC2/GINS4/MCM2/MCM3/MCM4	double-strand break repair via break-induced replication	11	-0.271947	-0.570351	0.934681	1	1	6727	tags=73%, list=37%, signal=46%	MCM3/GINS4/MCM7/MCM5/MUS81/GINS2/MCM4/CDC7	1.41774e-05	0.934681	p3_1.4177383776413e-05	p0_0.934681181959565
GO:0000729	DNA double-strand break processing	19	0.668429	1.70923	0.0127937	0.146768	0.129697	1218	tags=21%, list=6%, signal=20%	BRIP1/C14orf39/BLM/DNA2	DNA double-strand break processing	18	0.562022	1.47224	0.0552381	0.460181	0.428678	3356	tags=33%, list=16%, signal=28%	SPO11/C14orf39/BRIP1/BLM/UBE2N/HELB	DNA double-strand break processing	19	0.218903	0.618873	0.938356	1	1	3088	tags=21%, list=17%, signal=17%	SLX1A/SLX1B/SMARCAD1/HELB	0.0127937	0.938356	p3_0.0127937061210179	p0_0.938356164383562
GO:0000731	DNA synthesis involved in DNA repair	39	0.622785	1.87297	0.000727266	0.0220455	0.0194813	3300	tags=38%, list=16%, signal=32%	POLQ/DTL/POLE2/RFC3/SYCP1/RRM1/POLE/POLA1/POLD1/POLD3/CDKN2D/USP1/PCNA/PRIMPOL/MAD2L2	DNA synthesis involved in DNA repair	38	0.336474	1.05858	0.371115	0.810826	0.755318	3881	tags=29%, list=18%, signal=24%	PRIMPOL/USP10/TREX1/POLE2/POLA1/TEX12/PCNA/POLD2/RRM1/POLD3/VCP	DNA synthesis involved in DNA repair	37	0.190278	0.632644	0.970085	1	1	1849	tags=11%, list=10%, signal=10%	PCLAF/POLH/RRM2B/POLD4	0.000727266	0.970085	p3_0.000727266297399741	p0_0.97008547008547
GO:0000768	syncytium formation by plasma membrane fusion	50	-0.433272	-1.31991	0.0910747	0.387421	0.342358	1581	tags=22%, list=8%, signal=20%	CD53/SCGB3A1/ADAMTS5/PTGFRN/ADGRB3/CAV3/CXCL10/ADGRB1/CACNA1H/GDF15/TNFSF14	syncytium formation by plasma membrane fusion	55	-0.412085	-1.41003	0.0178353	0.223784	0.208464	2373	tags=25%, list=11%, signal=23%	CACNA1H/WNT1/PLEKHO1/RAPGEF3/ADAMTS15/MYOG/TANC1/DOCK1/ERVW-1/ADAM9/CDON/GDF15/DYRK1B/KCNH1	syncytium formation by plasma membrane fusion	48	0.266973	0.938895	0.550725	1	1	1963	tags=21%, list=11%, signal=19%	TREM2/ADAM12/CD109/CD9/NEO1/NOS1/ADAMTS15/GDF15/CD53/DYRK1B	0.0178353	0.550725	p1_0.0178353087000404	p0_0.550724637681159
GO:0000819	sister chromatid segregation	220	0.698287	2.74732	1e-10	1.68977e-08	1.49322e-08	1622	tags=30%, list=8%, signal=28%	KIF18B/SPC24/SPC25/DLGAP5/BIRC5/CDC20/BUB1B/NCAPG/NUF2/KIFC1/AURKB/SKA3/NCAPH/PLK1/TOP2A/NEK2/TTK/CDCA8/BUB1/NUSAP1/CENPE/CENPF/KIF4A/KIF14/ZWINT/CCNB1/MYBL2/PRC1/SPAG5/CDK1/ESPL1/NDC80/KIF2C/KIF11/CDCA5/TRIP13/TACC3/UBE2C/UHRF1/CENPI/KIF18A/KIF23/RACGAP1/MAD2L1/CENPK/CDT1/SKA1/NCAPG2/KNTC1/USP44/TPX2/PSRC1/KIF25/SMC4/XRCC3/KIF22/INCENP/KIF4B/FBXO5/RMI2/TTN/KNSTRN/GEN1/ANKRD53/DPF1/NCAPD3/ZWILCH	sister chromatid segregation	219	0.461642	1.91218	1.08669e-08	9.58147e-06	8.92553e-06	4533	tags=40%, list=22%, signal=32%	ANAPC2/SKA1/TRIP13/KIF18A/NCAPH/RMDN1/CEP97/INCENP/DPF1/ZWILCH/DYNC1LI1/AURKB/SPICE1/ZW10/DIS3L2/GEN1/NCAPG/TUBG1/WRAP73/UBE2C/EML3/SMC1A/PLK1/CCNB1/TRIP13/SKA3/TTK/RAN/PRC1/KIF2A/TUBG2/CHMP6/SPDL1/ESPL1/PRICKLE1/KIF22/CDC23/TEX14/BCCIP/RIOK2/NUDC/MAPRE1/NEK2/KIFC1/PSRC1/MYBL2/CHMP1A/AAAS/SMC2/RRS1/STAG1/CDCA5/DRG1/TACC3/NDC80/CHMP7/SMC4/BUB1/MAD2L1/CDCA8/RB1/PINX1/ANAPC7/VPS4A/KIF11/BUB1B/HNRNPU…	sister chromatid segregation	218	-0.148282	-0.468021	1	1	1	4910	tags=22%, list=27%, signal=16%	HSPA1A/ZWINT/BCL7A/PRICKLE1/SMC3/BCL7B/CHFR/BCL7C/KIF11/MYBL2/SPAG5/CLASP2/ACTB/SMC1A/USP44/PRC1/CENPK/KIF23/NCAPD3/ANAPC15/FBXO5/DPF3/KIF2A/NUF2/INCENP/BIRC5/CDCA8/BUB1/KIF4A/FLNA/SMARCE1/RMDN1/SPDL1/UBE2C/GEN1/ANKRD53/UHRF1/CDC6/DLGAP5/KAT2B/TOP2A/TTN/MAP10/MAPK15/NCAPH/MISP/CDT1/PINX1	1e-10	1	p3_1e-10	p0_1
GO:0000910	cytokinesis	164	0.536417	2.04053	4.45743e-08	5.39297e-06	4.76568e-06	1519	tags=17%, list=8%, signal=16%	KIF20A/ANLN/CEP55/BIRC5/CIT/AURKB/PLK1/E2F8/IQGAP3/CDCA8/NUSAP1/KIF4A/KIF14/PRC1/ESPL1/KIF20B/CENPA/AURKA/KIF23/STMN1/RACGAP1/CKAP2/ECT2/INCENP/KIF4B/BRCA2/NOX5/ANKRD53	cytokinesis	165	0.265619	1.06187	0.323689	0.794763	0.740354	3801	tags=22%, list=18%, signal=19%	CALM1/CENPV/CDC14A/INCENP/PDCD6IP/DRD2/AURKB/RAB35/PLK1/E2F8/CEP55/EXOC1/PRC1/ACTR2/CHMP6/ARF1/TAS1R2/ESPL1/ZFYVE19/TEX14/ORC4/CHMP1A/ACTR3/CDC42/CHMP7/RHOC/CDCA8/KIF20B/VPS4A/BIRC5/RACGAP1/KIF23/ANLN/MYO19/ROCK1/CKAP2/NUSAP1	cytokinesis	155	-0.138442	-0.427393	1	1	1	7657	tags=48%, list=42%, signal=28%	EXOC8/SON/KLHL21/SPAST/CSPP1/RACGAP1/CHMP1B/USP8/APC/CETN2/PDCD6IP/CALM2/WASHC5/FLCN/CENPV/CFL1/PIN1/BIRC6/ARL3/MAP9/TEX14/KLHDC8B/ECT2/CHMP2B/STMN1/GIT1/DCTN3/AURKB/IQGAP3/IGF1R/TTC19/SH3GLB1/UVRAG/RAB35/EXOC3/IST1/CHMP7/KLHL9/IQGAP1/AURKC/BECN1/CDC42/SVIL/KIF3B/RAB11A/RASA1/ROCK1/CKAP2/CIT/ANLN/KIF20A/E2F7/FMN2/ROCK2/ANXA11/PIK3R4/RHOB/MITD1/PRC1/KIF23/INCENP/BIRC5/CDCA8/KIF4A/MYH10/ANKRD53/KLH…	4.45743e-08	1	p3_4.45742534947078e-08	p0_1
GO:0000956	nuclear-transcribed mRNA catabolic process	114	0.162848	0.584256	1	1	0.883684	7729	tags=48%, list=38%, signal=30%	ZFP36/A1CF/EXOSC2/AGO2/EXOSC9/HNRNPD/MRTO4/EXOSC10/ZFP36L2/LSM4/TNRC6A/EXOSC8/SYNCRIP/DHX9/PDE12/EXOSC3/GSPT1/IGF2BP1/HNRNPAB/YBX1/NCBP1/THRAP3/DCPS/CAPRIN1/EDC4/HNRNPU/XRN1/AGO1/RBM8A/DIS3L2/UPF3B/UPF1/MLH1/TNRC6B/CASC3/UPF3A/HBS1L/SMG9/PNRC2/DHX34/UPF2/CNOT6/RNPS1/TNRC6C/SAMD4B/SMG1/MTPAP/DDX5/DHX36/CNOT7/MAGOHB/ZFP36L1/EIF4A3/TOB1/RC3H2	nuclear-transcribed mRNA catabolic process	115	-0.178171	-0.69407	0.983759	0.994935	0.926823	5072	tags=32%, list=24%, signal=25%	UPF3A/TNRC6A/ZFP36/DHX34/DCP1A/DXO/LSM1/UPF1/SAMD4B/DIS3/CNOT7/PAN3/DCP1B/CNOT6L/UPF3B/PELO/ZCCHC7/ZC3H12A/TNRC6C/GSPT2/CSDE1/CTIF/NBAS/ATM/ZFP36L1/RC3H2/NANOS3/BTG2/NT5C3B/SMG7/PAIP1/IGF2BP1/PNLDC1/ZFP36L2/PNRC1/RC3H1/SMG1	nuclear-transcribed mRNA catabolic process	116	0.11044	0.463392	1	1	1	422	tags=3%, list=2%, signal=3%	CPEB3/TENT4B/NANOS3	0.983759	1	p1_0.983758700696056	p3_1
GO:0000959	mitochondrial RNA metabolic process	49	0.38359	1.20821	0.175947	0.510577	0.451189	7402	tags=55%, list=37%, signal=35%	TFAM/DARS2/SARS2/FASTKD2/PRKAA1/AARS2/PDE12/METTL4/ELAC2/MTERF3/PUS1/FASTKD1/TBRG4/MRPL12/MTERF4/RPUSD4/FASTKD3/SLIRP/TRMT5/TRMT10C/TFB1M/METTL8/CDK5RAP1/EARS2/MTERF2/MTPAP/MTERF1	mitochondrial RNA metabolic process	48	0.519475	1.70831	0.00192087	0.0722902	0.0673413	4562	tags=46%, list=22%, signal=36%	TRMT61B/TBRG4/PUS1/METTL8/MTPAP/SARS2/TFAM/HSD17B10/POLRMT/FASTKD3/MTERF3/FASTKD2/MTERF2/TEFM/TRMT10C/TRIT1/ELAC2/MTERF1/TFB2M/MTERF4/YARS2/PNPT1	mitochondrial RNA metabolic process	50	0.160932	0.579458	0.995098	1	1	3516	tags=16%, list=19%, signal=13%	AARS2/MTO1/POLRMT/TRMT61B/PPARGC1B/FASTKD1/TFB1M/CHCHD10	0.00192087	0.995098	p1_0.00192086648636685	p0_0.995098039215686
GO:0000963	mitochondrial RNA processing	21	0.341361	0.893785	0.610879	0.844549	0.746315	7235	tags=57%, list=36%, signal=37%	FASTKD2/ELAC2/PUS1/FASTKD1/TBRG4/RPUSD4/FASTKD3/TRMT5/TRMT10C/METTL8/CDK5RAP1/MTPAP	mitochondrial RNA processing	21	0.660809	1.81929	0.00191733	0.0722902	0.0673413	6180	tags=76%, list=29%, signal=54%	TRMT61B/TBRG4/PUS1/METTL8/MTPAP/HSD17B10/FASTKD3/FASTKD2/TRMT10C/TRIT1/ELAC2/PNPT1/CDK5RAP1/FASTKD5/RPUSD4/FASTKD1	mitochondrial RNA processing	21	0.305643	0.893276	0.592466	1	1	12584	tags=100%, list=69%, signal=31%	MTO1/TRMT61B/FASTKD1/SUPV3L1/FASTKD5/FASTK/FASTKD3/PNPT1/RPUSD4/TRMT5/MTPAP/CDK5RAP1/PUS1/ELAC2/METTL8/FASTKD2/TBRG4/TRIT1/TRMT10C/TRNT1/HSD17B10	0.00191733	0.610879	p1_0.00191732897902547	p3_0.610878661087866
GO:0000966	RNA 5'-end processing	21	0.42612	1.11571	0.317992	0.653798	0.577751	6925	tags=52%, list=34%, signal=34%	POP1/UTP20/NOP9/RPP40/POP7/TBL3/RPP30/POP5/TRMT10C/RPP14/POP4	RNA 5'-end processing	20	0.502388	1.36122	0.109665	0.587166	0.546969	4562	tags=55%, list=22%, signal=43%	RPP40/POP5/UTP20/HSD17B10/POP4/THG1L/TRMT10C/POP1/NOP9/POP7/PNPT1	RNA 5'-end processing	21	0.19969	0.583617	0.958904	1	1	547	tags=5%, list=3%, signal=5%	RPP25	0.109665	0.958904	p1_0.109665427509294	p0_0.958904109589041
GO:0001101	response to acid chemical	115	-0.340165	-1.18089	0.152603	0.481444	0.425445	4215	tags=29%, list=21%, signal=23%	PKD2/SESN1/IGF1R/CPEB3/AMIGO1/ASS1/CPEB4/COL1A2/CEBPB/RRAGD/COL18A1/GLRA2/RRAGB/COL3A1/COL5A2/XBP1/KCNB1/COL16A1/TNF/COL4A6/BCL11A/LYN/SESN2/FYN/FGF21/COL4A1/KRT8/NTRK1/PDGFD/SLC7A5/VEGFA/PKD2L1/EDN1	response to acid chemical	124	0.252365	0.97212	0.518584	0.881319	0.820985	3222	tags=19%, list=15%, signal=16%	BAIAP2/EIF2S1/GRIN2D/TUBA1A/TMBIM6/MYD88/SESN3/SIX1/GLRA2/AVPR1A/PDX1/CASP3/CPEB1/F7/COL1A1/UFL1/GHSR/PCNA/ALAD/ZEB1/GRIA1/COL3A1/KLF2	response to acid chemical	111	0.228518	0.945642	0.583333	1	1	1825	tags=13%, list=10%, signal=11%	SIX1/PDGFD/CPEB3/BMT2/KRT8/NTRK2/PKD2L1/LRP11/COL18A1/SOCS1/SH3BP4/COL5A2/COL3A1/COL16A1	0.152603	0.583333	p3_0.152603231597846	p0_0.583333333333333
GO:0001325	formation of extrachromosomal circular DNA	15	0.745275	1.7908	0.00370431	0.0705922	0.0623812	3325	tags=47%, list=16%, signal=39%	EXO1/BLM/XRCC3/DNA2/RTEL1/SLX1A/SLX4	formation of extrachromosomal circular DNA	13	0.322205	0.78435	0.776735	0.959897	0.894184	7345	tags=62%, list=35%, signal=40%	BLM/RTEL1/TERF2/EXO1/XRCC5/TERF1/XRCC3/WRN	formation of extrachromosomal circular DNA	14	0.283788	0.748716	0.790909	1	1	2566	tags=21%, list=14%, signal=18%	SLX1A/SMARCAL1/SLX1B	0.00370431	0.790909	p3_0.00370430834883374	p0_0.790909090909091
GO:0001408	guanine nucleotide transport	10	0.661597	1.43856	0.0576541	0.31919	0.282063	4039	tags=50%, list=20%, signal=40%	SLC46A2/ABCC4/LRRC8C/SLC17A9/LRRC8B	guanine nucleotide transport	10	0.719689	1.64074	0.0140007	0.197289	0.183783	2944	tags=50%, list=14%, signal=43%	LRRC8B/SLC19A1/SLC46A2/LRRC8E/SLC17A9	guanine nucleotide transport	8	0.368534	0.816867	0.687671	1	1	3499	tags=38%, list=19%, signal=30%	SLC17A9/LRRC8A/ABCC5	0.0140007	0.687671	p1_0.0140007157103387	p0_0.687671232876712
GO:0001502	cartilage condensation	12	0.412845	0.923365	0.579618	0.82675	0.730587	2084	tags=33%, list=10%, signal=30%	SOX6/BARX2/SOX5/SOX9	cartilage condensation	18	-0.293634	-0.796177	0.75891	0.956307	0.89084	3474	tags=28%, list=17%, signal=23%	SOX5/OTOR/THRA/FGF4/SOX6	cartilage condensation	10	0.28051	0.675161	0.882184	1	1	2376	tags=30%, list=13%, signal=26%	MGP/COL11A1/SOX9	0.579618	0.882184	p3_0.579617834394904	p0_0.882183908045977
GO:0001503	ossification	386	-0.257169	-1.01909	0.388535	0.707881	0.625543	4005	tags=26%, list=20%, signal=21%	JUND/LRP5/EXT1/WNT3/PENK/MMP14/TEK/FSTL3/SMAD7/PTK2B/NAB1/VDR/LOX/CDH11/EXT2/COL1A2/FASN/BCOR/COL11A1/CEBPB/BMP4/FZD9/DKK1/PLXNB1/ADAMTS7/BMP8B/GATA1/WNT3A/SHH/CALCA/MSX2/VCAN/NOCT/DHH/BMP2/COL5A2/SLC24A3/STC1/CSF1/ID3/ID4/CRIM1/SNAI1/PHOSPHO1/WNT4/LTBP3/THBS3/TUFT1/COL2A1/MRC2/TNN/EIF2AK3/GJA1/FOXC1/ATF4/MATN1/CEBPD/CCDC154/FGF9/MDK/FGF2/CALCR/TNF/TACR1/FBN2/IFITM1/GPLD1/SMO/NOTUM/SOX8/CBS/MGP/A…	ossification	399	0.240202	1.04812	0.276667	0.76007	0.708037	3568	tags=19%, list=17%, signal=16%	RASSF2/ACVR2A/CTHRC1/ROR2/HGF/LOX/FGF23/FSTL3/NOTCH1/KL/RSPO2/ZMPSTE24/CCDC134/OSTN/BCAP29/SUFU/PENK/EBP/NPPC/CLIC1/BMP2/CYP24A1/DDX21/SLC24A3/IL6R/GTPBP4/TNFAIP6/OSR2/SRGN/SGMS2/SOX8/FIGNL1/TP63/DKK1/SPP1/RDH14/BMP1/PTCH1/COMP/ERCC2/COL1A1/PRICKLE1/SYNCRIP/SEMA7A/TMEM53/CREB3L1/BGLAP/PAM16/CCDC47/UFL1/RANBP3L/CBFB/RBMX/HNRNPC/FHL2/RSL1D1/FGF18/MYBBP1A/GLI1/MINPP1/TWIST2/MEN1/ALYREF/SOX9/SMAD5/CL…	ossification	356	0.240511	1.20218	0.0683725	1	1	3080	tags=23%, list=17%, signal=19%	IBSP/SPP1/COMP/PTN/CLEC3B/PTHLH/SLC24A3/SMOC1/CTHRC1/MDK/TPH1/IFITM1/EPHA2/PPARG/TEK/CYP27B1/CDH11/COL13A1/BCL2/SMPD3/KAZALD1/ALOX5/SNAI1/TMEM38B/MGP/SNX10/ECM1/ITGA11/ADAMTS7/TNC/ANKH/CLEC11A/BMP6/ALYREF/FGR/CBFB/COL5A2/IFT80/COL11A1/RFLNA/GLI3/RUNX3/RUNX2/TENT5A/RUNX1/VCAN/MEN1/CHSY1/MYBBP1A/SIX2/SMAD6/MESD/SRGN/ACVR1/FFAR4/HIF1A-AS2/ERFE/PHEX/RSPO2/SOX9/LEF1/SCX/FHL2/CLEC5A/SOST/BMP4/P2RX7/SMA…	0.0683725	0.388535	p0_0.0683725073394542	p3_0.388535031847134
GO:0001504	neurotransmitter uptake	38	-0.439895	-1.27116	0.127542	0.444544	0.392837	1737	tags=32%, list=9%, signal=29%	SLC6A11/GFAP/SLC22A3/SLC6A13/SYNGR3/SLC6A12/ATP1A2/SLC22A2/SLC1A7/SLC6A4/DRD4/SLC18A3	neurotransmitter uptake	43	0.311166	0.997366	0.437848	0.843237	0.78551	1942	tags=26%, list=9%, signal=23%	SLC18A2/DRD2/ITGB3/SLC22A2/KCNJ10/TOR1A/SLC29A4/SLC6A13/GFAP/SLC6A3/PER2	neurotransmitter uptake	25	-0.298908	-0.735481	0.788462	1	1	3712	tags=28%, list=20%, signal=22%	ATP1A2/SLC18A2/SNCA/SLC38A1/SLC29A2/ITGB3/SLC6A4	0.127542	0.788462	p3_0.127541589648799	p0_0.788461538461538
GO:0001508	action potential	136	-0.368043	-1.30625	0.0483592	0.310008	0.273949	2452	tags=28%, list=12%, signal=25%	GRIK2/HCN2/USP53/HCN1/GJA1/KCNB1/GPR35/TNF/SCN3B/CACNA1D/TACR1/KCNMB4/CNR2/DMD/KCNE4/SLC8A2/JUP/CACNA2D1/GNA14/RYR2/MYH14/AKAP6/CAV3/DSP/GNA15/CACNA1I/KCNJ3/KCNQ1/HCN4/KCNE3/CHRNB2/ADRA1A/ATP1A2/P2RX1/PKP2/KCND3/NRCAM/GJA5	action potential	143	-0.332071	-1.34119	0.0128965	0.195134	0.181776	3636	tags=28%, list=17%, signal=24%	CHRNB4/SCN4A/SCN1A/CACNA1I/SLMAP/FGF13/SLC4A3/SCN7A/KCNE4/SOD1/AKAP6/KCNJ2/BIN1/GJC1/KCNMB2/DLG1/CTNNA3/SCN3B/NRCAM/ATP2A2/CACNB3/ADRA1A/FKBP1B/CACNB4/JUP/SCN3A/SCN9A/KCNH2/DRD1/DSG2/NOS1AP/CNTNAP1/SLC8A1/SUMO1/KCNMB4/KCNA2/CD36/CXADR/NEDD4L/DSP/SCN4B	action potential	106	-0.39623	-1.1935	0.220721	1	1	4083	tags=37%, list=23%, signal=29%	GJA1/KCND3/NUP155/KCNJ8/AKAP6/CD36/KCNJ5/ATP1A2/DSG2/FGF12/FLNA/YWHAH/DMD/USP53/SCN2B/KCNJ11/GPER1/SCN9A/KCNE3/NOS1AP/KCND2/TACR1/MYH14/GNA14/CACNB2/SCN3B/SLMAP/RYR2/SCN2A/CXADR/NRCAM/KCNJ2/KCNB1/CACNA1D/CNR1/CLN3/SCN3A/CAV3/SCN7A	0.0128965	0.220721	p1_0.0128965064031341	p0_0.220720720720721
GO:0001510	RNA methylation	80	0.331256	1.13146	0.229545	0.572625	0.50602	7650	tags=59%, list=38%, signal=37%	WDR4/TRDMT1/FDXACB1/TRMT6/RBM15/TRMT13/FBL/HENMT1/NSUN5P1/ALKBH8/SNRPB/SNRPE/SNRPF/METTL4/SNRPD1/METTL3/NSUN5P2/METTL5/MRM1/DIMT1/GTPBP3/NOP2/NSUN6/FTSJ3/TRMT1L/TRMT5/EMG1/TARBP1/ZCCHC4/TRMT61A/METTL16/ZC3H13/THUMPD3/TRMT10C/TFB1M/SNRPD3/CMTR2/METTL8/DALRD3/TRMT10B/TRMT2B/NSUN5/AKT1/SNRPG/TYW3/LARP7/MEPCE	RNA methylation	78	0.514071	1.86279	6.03652e-05	0.00610777	0.00568964	4458	tags=38%, list=21%, signal=30%	HENMT1/ZC3H13/ALKBH8/TRMT61B/METTL1/METTL8/DIMT1/METTL3/THUMPD3/RBM15/MRM1/FTSJ1/TARBP1/HSD17B10/METTL15/TRMT6/EMG1/NSUN4/TRMT10C/SNRPB/TGS1/METTL2B/NOP2/FTSJ3/WDR4/NSUN2/TRMT1L/TFB2M/ZCCHC4/SNRPD1	RNA methylation	83	0.167581	0.667947	1	1	1	3420	tags=16%, list=19%, signal=13%	TRMT44/METTL1/BCDIN3D/THUMPD2/MTO1/MRM2/TRMT61B/HENMT1/BUD23/TFB1M/METTL2B/METTL14/WDR4	6.03652e-05	1	p1_6.03651736901134e-05	p0_1
GO:0001516	prostaglandin biosynthetic process	24	-0.594505	-1.59004	0.022716	0.197461	0.174493	4507	tags=54%, list=22%, signal=42%	PNPLA8/MIF/PLA2G3/PTGS1/PTGIS/EDN2/PLA2G4F/PLA2G10/PTGES/PTGDS/EDN1/PTGS2/IL1B	prostaglandin biosynthetic process	27	0.416236	1.20426	0.184162	0.685731	0.638787	4700	tags=41%, list=22%, signal=32%	PLA2G4F/PLA2G10/PTGS1/AVPR1A/PLA2G3/PTGDS/CD74/AKR1C3/PLA2G4A/PTGES2/TBXAS1	prostaglandin biosynthetic process	24	-0.382667	-0.938214	0.504144	1	1	2315	tags=17%, list=13%, signal=15%	PTGS2/PLA2G10/PLA2G4F/AVPR1A	0.022716	0.504144	p3_0.0227160270020096	p0_0.50414364640884
GO:0001522	pseudouridine synthesis	18	0.430339	1.07533	0.377358	0.699215	0.617885	6812	tags=50%, list=34%, signal=33%	PUS7L/GAR1/PUS1/RPUSD1/RPUSD3/RPUSD4/TSR3/TRUB2/PUSL1	pseudouridine synthesis	18	0.461557	1.20907	0.215238	0.706881	0.658488	8104	tags=78%, list=39%, signal=48%	PUS1/DKC1/GAR1/TRUB2/RPUSD1/PUS7L/NOP10/RPUSD4/PUS10/PUSL1/PUS7/TSR3/PUS3/NAF1	pseudouridine synthesis	18	0.413155	1.13706	0.27972	1	1	4222	tags=28%, list=23%, signal=21%	PUS10/PUS7/TRUB1/GAR1/RPUSD2	0.215238	0.377358	p1_0.215238095238095	p3_0.377358490566038
GO:0001523	retinoid metabolic process	75	0.303502	1.02129	0.390187	0.709152	0.626667	1983	tags=19%, list=10%, signal=17%	CYP3A5/ADH7/RBP4/DHRS4L1/DHRS9/ADH1B/AWAT2/LRAT/ADH1A/AKR1C4/BCO1/CRABP2/ALDH1A2/CYP3A4	retinoid metabolic process	79	0.293402	1.06394	0.321429	0.793738	0.7394	4096	tags=28%, list=20%, signal=23%	RPE65/ALDH1A3/RARRES2/AKR1C1/CYP3A4/CYP1A1/RDH12/RDH14/RDH10/ADH7/RDH13/CYP2C18/SDR16C5/AKR1C4/DHRS9/DGAT2/RBP4/AKR1C3/CYP2S1/BCO1/LRAT/PNPLA4	retinoid metabolic process	47	-0.389636	-1.06077	0.372946	1	1	4046	tags=38%, list=22%, signal=30%	CYP3A5/DGAT1/DGAT2/CYP2S1/RBP4/CYP27C1/AKR1B10/RBP1/PLB1/RDH5/ADH1C/RARRES2/RDH10/DHRS9/ALDH1A1/ADH1B/HSD17B6/SDR16C5	0.321429	0.390187	p1_0.321428571428571	p3_0.39018691588785
GO:0001539	cilium or flagellum-dependent cell motility	124	-0.215473	-0.757619	0.951473	0.995016	0.87928	3516	tags=27%, list=17%, signal=23%	DNAH6/CATSPER1/PGAM4/CFAP44/TMEM232/LZTFL1/CFAP52/PLA2G3/CFAP61/RSPH9/TTLL9/CFAP69/QRICH2/SPEM1/SLC9B1/CFAP58/TACR2/DNAH8/CCDC65/PGK2/APOB/SLC9C1/DNAH17/CFAP46/ENKUR/TACR1/TEKT4/CFAP221/DNAH11/DNAI1/GAS2L2/KLC3/LDHC/DRC7	cilium or flagellum-dependent cell motility	147	0.255002	1.00466	0.443478	0.843237	0.78551	4125	tags=24%, list=20%, signal=19%	DNALI1/DNHD1/TEX101/CCDC65/DNAH11/LDHC/RFX3/KIF9/TACR3/DNAH14/NME8/CATSPER3/SPEM1/CEP128/TTLL1/CFAP45/PLA2G3/CFAP69/CFAP20/RSPH4A/LZTFL1/ADAM7/ROPN1L/MAFIP/ROPN1L/CFAP44/TBC1D21/IQCF1/PRDM14/ROPN1/VDAC3/CFAP58/IQUB/IQCG/DNAJA1	cilium or flagellum-dependent cell motility	104	0.24023	0.985563	0.405172	1	1	4055	tags=35%, list=22%, signal=27%	CATSPER2/TEKT4/CATSPER1/APOB/DNAH7/CFAP58/TTLL9/SPEF2/KIF9/NPHP4/INTS13/TTLL1/DNALI1/CCDC65/ROPN1L/CATSPERD/PLTP/DNAH1/INPP5B/RSPH4A/CFAP221/DNAH17/TEKT2/CATSPERE/DRC1/CFAP65/TMEM232/ARMC12/CFAP206/CFAP157/ARMC3/ENKUR/CFAP43/DNAH2/GAS2L2/EFHC1	0.405172	0.951473	p0_0.405172413793103	p3_0.951473136915078
GO:0001541	ovarian follicle development	52	-0.394535	-1.20096	0.178637	0.512619	0.452994	4452	tags=35%, list=22%, signal=27%	MMP2/GAS2/HYAL3/MMP14/INHBA/CEBPB/AMH/CGA/ANG/INHA/FOXC1/PTX3/FOXL2/LFNG/INHBB/VEGFA/KDR/TNFAIP6	ovarian follicle development	57	0.292056	0.998985	0.453287	0.847802	0.789763	3315	tags=21%, list=16%, signal=17%	EIF2B2/SPO11/NPPC/TNFAIP6/DMRTA1/KDR/PTX3/HYAL3/FANCG/ANG/UBE3A/INHBB	ovarian follicle development	44	-0.350731	-0.940103	0.523748	1	1	4935	tags=34%, list=27%, signal=25%	EIF2B5/VEGFA/FOXC1/PTX3/GNRH1/SMAD4/FANCG/EREG/KIT/KDR/HYAL3/DMRTA1/INHBB/NPPC/BMPR1B	0.178637	0.523748	p3_0.178637200736648	p0_0.523748395378691
GO:0001547	antral ovarian follicle growth	11	-0.466385	-1.03949	0.427734	0.73306	0.647794	1481	tags=27%, list=7%, signal=25%	GAS2/PTX3/TNFAIP6	antral ovarian follicle growth	12	0.448888	1.07093	0.356343	0.810826	0.755318	1745	tags=25%, list=8%, signal=23%	NPPC/TNFAIP6/PTX3	antral ovarian follicle growth	10	-0.523543	-1.08521	0.396024	1	1	950	tags=60%, list=5%, signal=57%	ESR1/SCAPER/PTX3/EREG/NPPC/BMPR1B	0.356343	0.427734	p1_0.35634328358209	p3_0.427734375
GO:0001553	luteinization	10	0.370223	0.805005	0.723658	0.897737	0.793316	64	tags=10%, list=0%, signal=10%	A2M	luteinization	12	-0.243509	-0.585776	0.948498	0.990379	0.922579	15891	tags=50%, list=76%, signal=12%	GDF9/INHBA/PLEKHA1/A2M/STAT5B/MMP2	luteinization	9	-0.464403	-0.947157	0.53211	1	1	7625	tags=56%, list=42%, signal=32%	INHBA/PDGFRA/A2M/SGPL1/RETN	0.53211	0.948498	p0_0.532110091743119	p1_0.948497854077253
GO:0001556	oocyte maturation	27	0.372557	1.03955	0.432836	0.737458	0.65168	2134	tags=26%, list=11%, signal=23%	AURKA/TRIP13/DMC1/FBXO5/BRCA2/EREG/CDC25B	oocyte maturation	30	-0.286498	-0.874914	0.642857	0.921024	0.857972	3645	tags=32%, list=17%, signal=27%	SIRT2/TRIP13/NPPC/TRIP13/TUBB8/ZAR1L/ANG/BNC1/EDNRA/YTHDF2	oocyte maturation	25	-0.272038	-0.669366	0.873626	1	1	3881	tags=48%, list=21%, signal=38%	SIRT2/ANG/WASHC5/EDNRA/DMC1/PPP2R1A/RXFP2/FBXO5/RPS6KA2/EREG/AURKA/NPPC	0.432836	0.873626	p3_0.432835820895522	p0_0.873626373626374
GO:0001558	regulation of cell growth	379	-0.313472	-1.2408	0.0396825	0.276926	0.244715	2545	tags=17%, list=13%, signal=16%	EAF2/SGK1/RTN4R/ADAM17/F2/TSPYL2/NTN1/BDNF/TP53/TGFBR1/GJA1/ARHGAP4/OSGIN2/CLSTN3/WT1/SLIT2/CDKN1A/SEMA5A/FBP1/BCL11A/GDF9/DRAXIN/NRG3/TMEM196/CXCL16/SESN2/SEMA3G/SCGB3A1/SPOCK1/CRYAB/SEMA3D/SERPINE2/NGF/SEMA6B/BDKRB1/C8orf44-SGK3/SYT3/AKAP6/CAV3/MYOCD/TGFB2/IGFBP3/DDR1/HNF4A/SLC44A4/CDHR2/VEGFA/SGK2/IGFBP7/UNC13A/SOX17/MYL2/SLIT3/CXCR4/BST2/CACNG7/PAPPA2/NRCAM/IGFBP1/EDN1/HPN/SEMA5B/CEACAM1/NPPB…	regulation of cell growth	393	-0.226245	-1.03284	0.346056	0.805376	0.750241	3302	tags=20%, list=16%, signal=17%	SIN3A/GSK3B/FGF13/PTCH2/BCL6/PLXNA4/CHPT1/AGTR1/MAP1B/KAZALD1/SDCBP/HSPA1B/AKAP6/CLSTN1/PPARA/RGS4/CDKN1A/SH3BP4/DCUN1D3/SLIT3/WNT5A/STK11/SEMA4F/CACNG7/NRCAM/DISC1/TP53TG5/NAIF1/ARMC12/SEMA3D/TNR/LAMTOR2/SEMA5A/ADNP/JADE1/ENPP1/MAP3K13/ADAM15/SEMA4C/CISH/ULK1/MYOCD/SEMA3C/EGFR/TRIM32/DNM2/SEMA4B/DCC/CEACAM1/DNAJB2/EXTL3/MAP2/KAZALD1/LMX1A/MEGF8/CDKN1B/LGI1/CDH1/BTG1/KDM2B/SRF/TNC/CCDC85B/UCN/DRA…	regulation of cell growth	351	0.175822	0.864662	0.820232	1	1	3459	tags=21%, list=19%, signal=17%	CDKN2A/SPP1/KRT17/CXCR4/UCN/DISC1/CRABP2/SERPINE2/AGT/DDR1/TRIM46/CYP27B1/RPS6KA1/FRZB/BCL2/SEMA4B/SEMA5B/HSPA1B/ESR2/KAZALD1/NRG3/BST2/TGFB1/WT1/LIMK1/SEMA4F/TNC/SEMA5A/SH3BP4/CXCL12/RGS2/MEG3/APOE/DRAXIN/CPNE5/SHTN1/CXCL16/ULK2/SLIT3/PML/BRCA1/HDAC6/JADE2/URI1/WFDC1/CEACAM1/TTL/SEMA4C/SPHK1/RGS4/SEMA6C/SMAD7/PTK2B/CRLF3/SMURF1/ST7L/KDM2B/IGFBP3/PSRC1/RACK1/ENPP1/CDKN2C/FN1/ARHGAP4/TP53TG5/IGFBP…	0.0396825	0.820232	p3_0.0396825396825397	p0_0.820232202674049
GO:0001562	response to protozoan	25	0.38745	1.0628	0.373444	0.696359	0.615362	659	tags=16%, list=3%, signal=15%	IRF4/TSPAN32/IL10/IL12B	response to protozoan	27	-0.225456	-0.67393	0.934641	0.984877	0.917454	4142	tags=24%, list=20%, signal=19%	IRF4/GBP1/SPN/GBP2/BATF2/BCL3/IER3	response to protozoan	24	-0.349628	-0.85721	0.628453	1	1	4369	tags=58%, list=24%, signal=44%	HRAS/BPGM/MYD88/LYST/SPN/NKG7/GBP2/PF4/IL10/GBP1/ARG1/GBP7/CLEC7A/IER3	0.373444	0.934641	p3_0.37344398340249	p1_0.934640522875817
GO:0001569	branching involved in blood vessel morphogenesis	33	-0.444178	-1.26311	0.133945	0.453245	0.400526	1127	tags=24%, list=6%, signal=23%	SHH/MDK/COL4A1/VEGFA/KDR/NRARP/TBX20/EDN1	branching involved in blood vessel morphogenesis	34	-0.333177	-1.04104	0.3878	0.819134	0.763057	2719	tags=50%, list=13%, signal=44%	SFRP2/COL4A1/FGF8/NRP1/GBX2/ENG/VEGFA/ACVR1/TGFBR2/FKBPL/TBX20/MDK/NFATC4/PLXND1/LEF1/SRF/EDN1	branching involved in blood vessel morphogenesis	28	0.283022	0.872831	0.660517	1	1	3393	tags=32%, list=19%, signal=26%	MDK/ENG/PPP3R1/ACVR1/LEF1/PLXND1/GNA13/EDN1/NRP1	0.133945	0.660517	p3_0.13394495412844	p0_0.660516605166052
GO:0001570	vasculogenesis	78	-0.487948	-1.5971	0.00456374	0.0802124	0.0708824	1685	tags=24%, list=8%, signal=22%	HEG1/SMO/ACKR3/MYOCD/VEGFA/KDR/ITGB8/TBX20/TNNI3/CD34/SOX17/EGFL7/TIE1/HEY1/SOX18/MYO18B/HEY2/CEACAM1/NKX2-5	vasculogenesis	82	-0.257566	-0.948936	0.552133	0.895131	0.833851	5157	tags=32%, list=25%, signal=24%	VEGFA/ACKR3/TGFBR2/APLNR/PDGFRB/TBX6/NTRK2/FBXW7/CITED1/EGFL7/TIPARP/ZMIZ1/ITGAV/YAP1/CUL7/ZFP36L1/TBX20/GJC1/CITED2/RAPGEF2/MYOCD/RRAS/CEACAM1/AMOT/ITGB8/ADM	vasculogenesis	72	-0.253746	-0.729482	0.831962	1	1	4334	tags=35%, list=24%, signal=27%	CAV1/VEGFA/JUNB/YAP1/RAP1A/AGGF1/PDGFRB/AMOT/TBX5/MYO18B/SOX17/ADM/ZFPM2/CD34/MYOCD/CITED1/TGFBR3/WNT7B/FBXW7/TIE1/KDR/FOXF1/ACKR3/RAMP2/HAS2	0.00456374	0.831962	p3_0.00456374239292731	p0_0.831962397179788
GO:0001573	ganglioside metabolic process	26	-0.290444	-0.785891	0.810964	0.935382	0.826583	5180	tags=42%, list=26%, signal=32%	HEXA/B4GALNT1/ST6GALNAC4/HEXB/NAGLU/ST6GALNAC3/ABCA2/NEU1/ST3GAL5/ST3GAL1/ITGB8	ganglioside metabolic process	28	0.337595	0.985355	0.480591	0.861914	0.802909	2285	tags=23%, list=11%, signal=20%	ST3GAL5/B4GALT6/NEU1/GM2A/B4GALT6/NEU3/NEU2	ganglioside metabolic process	22	-0.38941	-0.934264	0.522346	1	1	3039	tags=27%, list=17%, signal=23%	B3GALT4/CLN6/ST3GAL5/B4GALNT1/ST6GALNAC5/ST6GALNAC6	0.480591	0.810964	p1_0.480591497227357	p3_0.810964083175803
GO:0001574	ganglioside biosynthetic process	15	0.359701	0.864314	0.639175	0.856624	0.756985	1951	tags=20%, list=10%, signal=18%	ST8SIA6/ST6GALNAC5/B3GALT4	ganglioside biosynthetic process	17	0.443237	1.14324	0.286528	0.764238	0.71192	6681	tags=45%, list=32%, signal=31%	ST3GAL5/B4GALT6/B4GALT6/ST3GAL3/C20orf173/ST6GALNAC4/ST6GALNAC3/ST3GAL2/ST8SIA2	ganglioside biosynthetic process	12	-0.543176	-1.15719	0.307339	1	1	3039	tags=42%, list=17%, signal=35%	B3GALT4/ST3GAL5/B4GALNT1/ST6GALNAC5/ST6GALNAC6	0.286528	0.639175	p1_0.286527514231499	p3_0.639175257731959
GO:0001578	microtubule bundle formation	94	0.380048	1.32358	0.0490714	0.310761	0.274615	2688	tags=20%, list=13%, signal=18%	CAPN6/KIF20A/PLK1/FSIP2/SPAG17/TTLL6/PSRC1/RP1L1/RP1/DNAAF1/CCDC39/MNS1/TPPP/FES/ZMYND10/CFAP47/DRC1/DNAH5/NEURL1	microtubule bundle formation	97	-0.223114	-0.848181	0.780886	0.960808	0.895032	3125	tags=20%, list=15%, signal=17%	SPAG17/CEP131/NUMA1/MAP1B/DNAH7/NEURL1/CLASP1/CLIP1/RSPH9/CAPN6/DNAJB13/NISCH/CFAP43/SPAG16/TTLL6/CFAP47/ZMYND10/NCKAP5/GAS2L2	microtubule bundle formation	87	0.302605	1.21521	0.153568	1	1	3989	tags=36%, list=22%, signal=28%	DNAAF4/ZMYND10/SPACA9/TRIM46/RP1/DNAH7/CFAP58/TPPP3/SPEF2/JHY/DNAAF1/TTLL1/CCDC65/DNAH1/CPLANE2/GAS2L1/PSRC1/RSPH4A/CFAP73/SPAG1/DNAH17/CFAP74/TEKT2/DRC1/CFAP65/CFAP206/CFAP157/CFAP43/DNAH2/GAS2L2/MTCL1	0.0490714	0.780886	p3_0.0490714241697007	p1_0.780885780885781
GO:0001580	detection of chemical stimulus involved in sensory perception of bitter taste	22	-0.678872	-1.78584	0.00386673	0.0726832	0.064229	2559	tags=45%, list=13%, signal=40%	TAS2R14/RTP4/TAS2R31/TAS2R4/RTP1/PIP/TAS2R43/LPO/AZGP1/TAS2R1	detection of chemical stimulus involved in sensory perception of bitter taste	34	-0.25747	-0.804488	0.79085	0.963293	0.897347	1565	tags=12%, list=7%, signal=11%	AZGP1/TAS2R31/TAS2R30/TAS2R10	detection of chemical stimulus involved in sensory perception of bitter taste	7	-0.695492	-1.3511	0.127214	1	1	3459	tags=71%, list=19%, signal=58%	TAS2R30/TAS2R4/PLCB2/AZGP1/PIGR	0.00386673	0.79085	p3_0.00386672927508991	p1_0.790849673202614
GO:0001649	osteoblast differentiation	215	0.249247	0.979709	0.524051	0.791937	0.699823	2362	tags=16%, list=12%, signal=15%	SOX11/WNT7B/OSTN/RANBP3L/NPNT/FGFR2/RSPO2/SFRP2/LEF1/DLX5/TMEM119/SEMA7A/ALPL/NELL1/FBXO5/TNC/RUNX2/PPARG/IBSP/FZD1/SEMA4D/RASSF2/GDF10/BMP3/FIGNL1/HGF/BMP7/SOX9/IGFBP5/SFRP1/TWIST1/GLI3/MYOC/IL6R/AMELX	osteoblast differentiation	218	0.349634	1.44825	0.00242455	0.0808883	0.0753508	3568	tags=26%, list=17%, signal=22%	RASSF2/ACVR2A/CTHRC1/HGF/LOX/FGF23/NOTCH1/RSPO2/OSTN/BCAP29/SUFU/PENK/NPPC/CLIC1/BMP2/CYP24A1/DDX21/IL6R/GTPBP4/TNFAIP6/SOX8/FIGNL1/TP63/SPP1/RDH14/PTCH1/COL1A1/SYNCRIP/SEMA7A/TMEM53/CREB3L1/BGLAP/CCDC47/UFL1/RANBP3L/CBFB/RBMX/HNRNPC/FHL2/RSL1D1/MYBBP1A/GLI1/TWIST2/MEN1/ALYREF/SOX9/SMAD5/CLEC5A/WNT10B/MEF2D/HNRNPU/MAPK14/IGFBP3/IPO7/SNAI1/SMOC1/RORB/ITGA11	osteoblast differentiation	202	-0.203	-0.63952	0.985294	1	1	3350	tags=16%, list=18%, signal=13%	FERMT2/CEBPD/BAMBI/TP53INP2/NPNT/AXIN2/ACHE/CITED1/FBN2/WNT7B/GLI2/MAP2K6/GLI1/FGF9/NOG/GREM1/BMP3/PTCH1/ALPL/RORB/LTF/SOX2/NPPC/SHOX2/BMPR1B/NOCT/MYOC/SFRP2/IGF1/IL6/IGF2/SFRP1	0.00242455	0.985294	p1_0.00242455349218311	p0_0.985294117647059
GO:0001654	eye development	348	0.242866	0.996367	0.444444	0.744437	0.657848	3152	tags=20%, list=16%, signal=17%	WNT16/CNTF/ABCB5/SOX11/DSCAM/FGF10/WNT7B/CHRDL1/RBP4/CRYGN/LAMC3/HPCA/TBX2/MAF/PBX4/WNT9B/FOXF2/DIO3/SHROOM2/RP1L1/AQP1/TH/WNT5B/RP1/CABP4/FASLG/NES/STRA6/TENM3/NKD1/WNT2/THY1/ATP8A2/RRM1/WNT9A/PRPH2/PITX2/LHX2/WNT5A/ALDH1A2/DLL4/BMP7/SOX9/DLL1/SLITRK6/CRYBA2/TWIST1/GLI3/ZEB1/OSR2/DRD2/PBX3/ANGPTL7/ATP2B4/NDP/SERPINF1/PRDM1/COL8A2/TULP1/SDK1/SPRED1/AQP5/FAT3/HIPK2/THRB/CASP2/CDKN1C/MAB21L2/SPRY2	eye development	382	0.233898	1.02099	0.365609	0.810826	0.755318	3622	tags=20%, list=17%, signal=17%	RARB/ADAMTS18/RPE65/LHX1/ALDH1A3/SIPA1L3/NOTCH1/THY1/STRA6/PBX2/PRPH2/GRM6/TSKU/BFSP2/TMEM231/MYOM2/DRD2/BAK1/TENM3/MFSD2A/OSR2/ACVRL1/RPGRIP1L/JMJD6/CYP1A1/SOX8/KDR/SPRED2/GDF3/TGFBR1/RS1/SH3PXD2B/PRICKLE1/RDH10/WDR19/SLC6A3/CC2D2A/MIP/VAX1/FRS2/CRYBA2/WNT2/CPAMD8/RDH13/DZANK1/HES5/NDP/CLIC4/GRHL2/TH/ATF6/LPCAT1/SERPINF1/RARG/ZEB1/KRT12/NPHP1/SKIL/DLL1/PAX6/GPM6A/SOX9/RBP4/CLCN2/LCTL/SOS1/RING1/…	eye development	291	-0.207588	-0.662661	0.9857	1	1	1843	tags=11%, list=10%, signal=10%	NKD1/SERPINF1/KDR/RDH10/GPM6A/TENM3/FOXF2/AQP5/EPHB1/CELF4/NR2E3/PROX1/FAT3/RORB/FZD5/WNT2/WNT5A/CLCN2/SOX2/DIO3/NRL/MFAP5/BMPR1B/PRPH2/FGF10/LAMC3/MEIS3/CRYGN/CHRDL1/SCO2/ANGPTL7	0.365609	0.9857	p1_0.365609348914858	p0_0.985699693564862
GO:0001655	urogenital system development	64	0.409783	1.34708	0.0550706	0.315911	0.279165	3418	tags=30%, list=17%, signal=25%	FGF10/HOXA9/PRLR/HELLS/FGFR2/HOXA10/TNC/CYP7B1/CRIP1/WNT5A/BMP7/SOX9/SFRP1/OSR2/SERPINF1/ESR1/SERPINB5/TP63/WDR77	urogenital system development	66	0.330623	1.15653	0.196522	0.690518	0.643246	3284	tags=25%, list=16%, signal=21%	LHX1/NOTCH1/WDR77/NKX3-1/OSR2/TP63/HOXA9/ALOX15B/PTCH1/FRS2/SERPINF1/RARG/GLI1/HOXB13/SOX9/UBE3A/ACD	urogenital system development	54	-0.358367	-0.988841	0.440594	1	1	2303	tags=22%, list=13%, signal=19%	NKX3-1/GLI1/CYP7B1/PRLR/NOG/SERPINF1/PTCH1/FOXA1/WNT5A/GATA2/FGF10/SFRP1	0.0550706	0.440594	p3_0.0550706209744696	p0_0.440594059405941
GO:0001656	metanephros development	84	-0.372107	-1.22398	0.128857	0.446471	0.39454	2806	tags=30%, list=14%, signal=26%	SHH/KIF26B/FBN1/TFAP2B/ID3/STAT1/WNT4/NKX3-1/PAX8/SPRY1/WT1/PDGFA/SMO/RDH10/SOX8/HES1/ITGA8/LHX1/FRAS1/CD34/SOX17/LIF/IRX1/GDF6/PDGFB	metanephros development	92	-0.250348	-0.943199	0.559524	0.900399	0.838759	5503	tags=37%, list=26%, signal=27%	SPRY1/AQP2/TCF21/SLC22A1/BMP4/PKD2/PDGFRB/GPC3/BCL2/CITED1/NF1/ACAT1/PDGFA/GLI3/SMAD4/AKR1B1/LGR4/YAP1/BASP1/DLG5/NPHS2/NIPBL/ITGA8/WNT9B/GDF11/SIX4/FBN1/IRX1/GREB1L/STAT1/BMP7/RET/FRAS1/GDNF	metanephros development	68	-0.397122	-1.13368	0.300358	1	1	4334	tags=40%, list=24%, signal=30%	YAP1/FMN1/PDGFRB/SMAD4/OSR2/SOX17/AQP2/OSR1/ITGA8/CD34/CITED1/GDF6/WNT7B/HNF1B/NKX3-1/ROBO2/MYC/LIF/RDH10/GREM1/GREB1L/PTCH1/IRX3/TCF21/IRX2/FGF10/GPC3	0.128857	0.559524	p3_0.128856624319419	p1_0.55952380952381
GO:0001657	ureteric bud development	92	-0.245825	-0.825912	0.825397	0.942004	0.832435	4511	tags=33%, list=22%, signal=25%	MYC/TACSTD2/TCF21/PTCH1/PKD2/ARG2/DLG1/SMAD7/BMP4/SALL1/EPCAM/SHH/KIF26B/BMP2/BMPER/WNT4/PAX8/FOXC1/SPRY1/FGF2/WT1/SLIT2/SMO/SOX8/HES1/CRLF1/LHX1/VEGFA/GATA3/TMEM59L	ureteric bud development	99	-0.207852	-0.787058	0.904762	0.978252	0.911282	5513	tags=33%, list=26%, signal=25%	VEGFA/SPRY1/TCF21/BMP4/PKD2/FGFR2/GPC3/BCL2/CITED1/ADAMTS16/GZF1/NPNT/GLI3/SMAD4/LGR4/BASP1/FGFR1/LZTS2/WNT9B/GDF11/SMAD2/NOG/DLG1/CTNNBIP1/WNT1/SIX4/FOXC1/EPCAM/GREB1L/LAMA5/BMP7/RET/GDNF	ureteric bud development	77	-0.237296	-0.688183	0.89554	1	1	3262	tags=23%, list=18%, signal=19%	GZF1/OSR1/NPNT/DCHS1/CITED1/HNF1B/SDC1/NOG/TACSTD2/ROBO2/MYC/GREM1/GREB1L/PTCH1/EPCAM/TCF21/GPC3/SFRP1	0.825397	0.904762	p3_0.825396825396825	p1_0.904761904761905
GO:0001658	branching involved in ureteric bud morphogenesis	55	0.250015	0.802722	0.832962	0.945866	0.835847	3125	tags=25%, list=15%, signal=22%	NPNT/WNT9B/EYA1/HOXB7/AGT/DCHS1/FOXD1/SIX1/SOX9/GLI3/HS3ST3A1/FGF1/ADAMTS16/HS3ST3B1	branching involved in ureteric bud morphogenesis	60	-0.235749	-0.816142	0.82619	0.966142	0.900001	5513	tags=37%, list=26%, signal=27%	VEGFA/TCF21/BMP4/PKD2/GPC3/BCL2/CITED1/ADAMTS16/GZF1/NPNT/GLI3/SMAD4/LGR4/WNT9B/NOG/DLG1/CTNNBIP1/WNT1/SIX4/GREB1L/LAMA5/GDNF	branching involved in ureteric bud morphogenesis	43	0.27618	0.95695	0.497738	1	1	2923	tags=33%, list=16%, signal=27%	SIX1/AGT/HS3ST3B1/BCL2/FGF1/WT1/PAX8/HOXB7/GLI3/SIX2/SOX9/BMP4/SOX8/WNT2B	0.497738	0.832962	p0_0.497737556561086	p3_0.832962138084632
GO:0001659	temperature homeostasis	173	-0.308931	-1.12941	0.19802	0.535307	0.473042	2858	tags=21%, list=14%, signal=18%	SYK/GRB10/ADRB1/DIO2/KDM3A/ELOVL3/ADAM17/GATM/SQSTM1/BSCL2/GJA1/ATF4/TNF/ABAT/PTGES/TRPM2/FGF21/SLN/ADAMTS5/SCD/IL13/WNT10B/VEGFA/HTR2A/ACHE/TLR4/NPR3/LCN2/IL18R1/DDIT3/CXCR4/NOVA2/NOD2/PTGS2/IL1A/IL1B	temperature homeostasis	180	-0.273089	-1.13861	0.164045	0.667526	0.621828	3055	tags=21%, list=15%, signal=18%	IL1A/PLCL1/NMU/CIDEA/NOX3/IL4/STK11/IGF1R/IGF2BP2/EDN2/OGT/EPAS1/GPX1/FFAR4/ARRDC3/LPIN1/KSR2/SQSTM1/ALDH1A1/NTSR1/PRKAB2/PTH2R/CEBPB/THRA/DRD1/ATF4/DECR1/PRKAB1/KDM3A/ALPL/ACVR2B/CD36/ADRB2/PRDM16/ZNF423/DDIT3/LEPR/NOVA1	temperature homeostasis	158	-0.343348	-1.0624	0.371739	1	1	3120	tags=19%, list=17%, signal=16%	LEPR/TNFRSF11A/ALMS1/PLCL1/ACHE/GHRL/ADIPOR2/LCN2/KSR2/PTGS2/IL18/MAP2K6/PRLR/ACADL/GATM/PPARGC1A/NR1D1/ALDH1A1/ALPL/ABAT/SYK/IGF2BP2/ADAMTS5/NOVA1/ELOVL3/PLAC8/ESRRG/ADRB1/CNR1/GPX1	0.164045	0.371739	p1_0.164044943820225	p0_0.371739130434783
GO:0001660	fever generation	11	-0.790058	-1.7609	0.00386992	0.0726832	0.064229	1875	tags=45%, list=9%, signal=41%	TNF/PTGES/PTGS2/IL1A/IL1B	fever generation	11	-0.459207	-1.07947	0.390192	0.819134	0.763057	8161	tags=73%, list=39%, signal=44%	PTGES/TRPV1/PTGER3/TNFRSF11A/CNR1/PTGS2/EDNRB/IL1A	fever generation	11	-0.388665	-0.815142	0.695179	1	1	4468	tags=45%, list=25%, signal=34%	IL1A/PTGES/TNFRSF11A/PTGS2/CNR1	0.00386992	0.695179	p3_0.00386991849258105	p0_0.695178849144635
GO:0001662	behavioral fear response	38	-0.367578	-1.06219	0.35305	0.680954	0.601749	3620	tags=37%, list=18%, signal=30%	PENK/FBXL20/DPP4/UCN/COMT/GRIK2/MDK/NPAS2/LYPD1/GNG7/ATP1A2/DRD4/ASIC4/GRP	behavioral fear response	40	-0.323736	-1.04743	0.376906	0.812864	0.757217	4090	tags=38%, list=19%, signal=30%	GABRA5/MECP2/HTR1A/GRPR/NEUROD2/FBXL20/MORC1/LYPD1/MDK/ALS2/DPP4/DRD1/DRD4/UCN/MEF2C	behavioral fear response	26	0.52197	1.59601	0.00932495	0.562846	0.562846	1911	tags=31%, list=11%, signal=28%	MDK/UCN/SLC1A1/NPAS2/BCL2/APOE/PDE8B/DPP4	0.00932495	0.376906	p0_0.00932494763303614	p1_0.376906318082789
GO:0001666	response to hypoxia	279	-0.406173	-1.56701	0.000166708	0.00716774	0.00633402	3958	tags=32%, list=20%, signal=26%	PENK/MMP14/TEK/INHBA/VASN/PDK3/PTK2B/CXCL12/AGTRAP/DPP4/EGLN1/PTGIS/RORA/SLC9A1/EPAS1/FAM162A/TRPV4/PGK1/ITPR1/COMT/PLK3/MIR106B/TREM2/FZD4/BMP2/STC1/ANG/BNIP3L/HK2/ITPR2/ERO1A/LONP1/ADAM17/THBS1/HSP90B1/NKX3-1/TP53/NDRG1/P4HB/ATF4/CHRNA7/LOXL2/TNF/LTA/BNIP3/VCAM1/HSPG2/ABAT/AJUBA/ANGPT2/GATA6/SLC2A4/CRYAB/STC2/KCNK3/ASCL2/GNGT1/PLOD1/CBS/RYR2/EGLN3/MIR214/HYOU1/AK4/CAV3/MYOCD/TGFB2/PGF/SLC8A3/MB…	response to hypoxia	287	-0.321979	-1.41939	0.00156611	0.0640136	0.0596313	1825	tags=15%, list=9%, signal=14%	NOL3/ADAM15/MTHFR/MYOCD/DPP4/CYBB/CREBBP/MIR17/PDLIM1/MIR210/ATF4/STC2/NPEPPS/CPEB2/FOXO3/EP300/CDKN1B/ADAM8/AK4/BMP7/SRF/FAM162A/BNIP3L/PIK3CB/DDIT4/MDM4/HIPK2/EGLN1/SOD2/CD24/EDN1/CA9/ALAS2/DIO3/AJUBA/MALAT1/TFRC/PTK2B/VHL/PDK1/SLC2A1/BNIP3/ADM	response to hypoxia	258	-0.212135	-0.675878	0.964985	1	1	3980	tags=21%, list=22%, signal=17%	KCNMB1/SUV39H2/WTIP/PPARA/CPT1A/KCNJ8/FGFR2/HILPDA/DDAH1/TGFB2/ADM/SLC2A8/CLDN3/HSD11B2/VHL/CASP9/THBS1/EGLN3/ADA/SOD2/MYOCD/CD24/TGFBR3/SIRT4/KCNJ11/PTGS2/NKX3-1/HIF3A/NR4A2/CPEB2/KCND2/P2RX2/EGLN2/CYBB/MYC/LIF/KCNK2/ABAT/CPEB1/PDK3/RYR2/CD38/CCNA2/ANGPT4/SCN2A/DIO3/NPPC/USF1/AGER/SLC6A4/NDNF/CAV3/VEGFD/SFRP1	0.000166708	0.964985	p3_0.000166707585752197	p0_0.964984552008239
GO:0001667	ameboidal-type cell migration	401	-0.345035	-1.37319	0.00276398	0.0582171	0.0514456	2639	tags=19%, list=13%, signal=17%	BMPER/IRS2/GADD45A/CRB2/STC1/GRN/MMRN2/PIK3CD/PTPRM/SNAI1/ADAM17/S100P/THBS1/RHOJ/ACTA2/SCARB1/FLT4/TGFBR1/GJA1/PTPRR/ARHGAP4/DMTN/HDAC9/FGF2/SLIT2/LOXL2/TNF/SEMA5A/AMOTL2/TACR1/CD40/RADIL/ATOH8/GPLD1/INSL3/ANGPT2/SMO/SEMA3G/NR4A1/JUP/KRT16/SEMA3D/SOX8/SCG2/LGMN/ANXA3/SEMA6B/PLK2/PLG/RAB25/CLEC14A/CDH13/TBX1/ZC3H12A/TGFB2/VEGFA/KDR/CDH2/HAS1/ADGRB1/ERBB4/EPPK1/MIXL1/ISL1/SOX17/GDF6/GATA3/HAND2/FU…	ameboidal-type cell migration	418	-0.245572	-1.12644	0.106965	0.583972	0.543994	4641	tags=28%, list=22%, signal=22%	FBXW7/EDNRB/TNFSF12/KANK2/PIK3C2A/ZNF580/NRP2/HAND2/OVOL2/EGF/HYAL1/NF1/IQSEC1/HDAC6/EPPK1/ACVR1C/EMC10/EPB41L4B/FOLR1/ITGB4/MAP2K5/AKT3/MECP2/LTB4R2/ZC3H12A/FAP/IRS2/DDR2/SIRT1/SRGAP2/TMSB4X/KRT16/SMAD4/CDH13/CCBE1/PLCG1/ADAM17/MET/FUT8/ERBB4/MARVELD3/FGFR1/SMURF2/PRKD1/CAPN7/LRP5/WNT5A/PATZ1/NODAL/IL4/ATOH8/SEMA4F/EDN2/ARSB/CLASP1/GPX1/SEMA3D/PITX2/LAMTOR2/SEMA5A/PROX1/EFNB1/VSTM4/SEMA4C/PHACTR…	ameboidal-type cell migration	382	-0.219045	-0.702768	0.969666	1	1	2193	tags=10%, list=12%, signal=9%	DCN/LRG1/NANOS1/FBXW7/SEMA3A/KIT/TACR1/TACSTD2/SERPINF1/KDR/FGF18/TBX1/GREM1/CD248/NR4A1/FGF7/FLT4/EPPK1/PROX1/ITGB3/FOLR1/ANGPT4/WNT5A/APOH/HBEGF/GATA2/FGF10/GPC3/HAS1/S100P/CLN3/CDH5/PIK3R3/CCBE1/S100A9/HAS2/S100A12/GPX1	0.00276398	0.969666	p3_0.00276398470319341	p0_0.969666329625885
GO:0001675	acrosome assembly	16	-0.505789	-1.21471	0.219844	0.563974	0.498375	1389	tags=44%, list=7%, signal=41%	TBPL1/PFN4/RFX2/TBC1D20/PLA2G3/CCDC42/PLN	acrosome assembly	23	-0.214148	-0.605469	0.975664	0.993155	0.925165	6939	tags=57%, list=33%, signal=38%	TBC1D20/VPS13B/ACTL7A/SPPL2C/PAFAH1B1/CCDC136/ACTL9/PFN4/SLC9A8/ZPBP/ACRBP/RFX2/CCDC42	acrosome assembly	17	-0.415576	-0.953081	0.524148	1	1	4001	tags=47%, list=22%, signal=37%	PLN/ACRBP/RFX2/PFN4/CCDC42/AGFG1/CCDC136/MFSD14A	0.219844	0.975664	p3_0.219844357976654	p1_0.975663716814159
GO:0001676	long-chain fatty acid metabolic process	97	-0.416104	-1.41047	0.0350809	0.25778	0.227796	4871	tags=37%, list=24%, signal=28%	CYP2D7/GSTP1/ACSL1/SLC27A5/PNPLA8/AIG1/SLC27A1/ELOVL5/ACSL3/ACSF2/ALOXE3/ACADL/PTGS1/PTGIS/ACSBG2/ACSM1/CYP4Z1/SLC27A2/FAAH/ELOVL3/PLA2G4B/LTC4S/PLA2G10/CYP2D6/FADS2/ALOX12B/FADS1/PTGDS/ELOVL2/CYP4F11/PLA2G4C/CYP2B6/ALOX15/CYP1A1/SLC27A6/PTGS2	long-chain fatty acid metabolic process	104	0.281251	1.06609	0.338384	0.7991	0.744395	4700	tags=29%, list=22%, signal=23%	ELOVL6/CYP2A13/ELOVL1/ADTRP/PLA2G10/PTGS1/CYP3A4/ACSL5/SLC27A3/CYP1A1/ALOX15B/CYP2B6/ACSBG1/CYP2C18/PTGDS/CPT2/CYP2C19/ACADL/LTC4S/AKR1C3/CYP2S1/PLA2G4A/ACSL4/ALOXE3/ELOVL2/PTGES2/SLC27A6/PLA2G2F/CYP4F2/TBXAS1	long-chain fatty acid metabolic process	79	-0.357307	-1.04014	0.390187	1	1	1892	tags=19%, list=10%, signal=17%	CPT1A/ABCD1/CYP2S1/GLYATL2/CYP4F12/SLC27A4/GSTM1/PTGS2/PLA2G10/ACADL/PLP1/ELOVL3/GSTM2/CYP4F11/GPX1	0.0350809	0.390187	p3_0.0350808843576717	p0_0.39018691588785
GO:0001678	intracellular glucose homeostasis	138	-0.317846	-1.13125	0.220137	0.564446	0.498792	2614	tags=20%, list=13%, signal=17%	IRS2/NOX4/HK2/XBP1/ABCA12/NCF1/ADCY5/KCNB1/FOXA3/ERN1/ADRA2A/GPLD1/ABCC8/BRSK2/PCK2/LIN28A/FGF21/HK3/SLC39A14/KLF15/BAIAP3/MLXIPL/GATA4/PTPRN/HKDC1/ICAM1/FOXA2	intracellular glucose homeostasis	146	-0.31244	-1.26696	0.0633803	0.493767	0.459964	4993	tags=28%, list=24%, signal=22%	CPB2/AGER/BAD/PRKAA2/CASR/LIN28A/FOXK1/ICAM1/ADCY5/NCF1/IRS2/SIRT1/SMAD4/RAB11FIP5/ZBTB20/GCG/SIN3A/NR1H4/PCK2/LRRC8A/LRP5/SMAD2/SLC12A6/IGF1R/OGT/GPX1/PIK3R2/PPP3CB/FKBP1B/CFTR/OSBP/FOXO3/PIH1D1/ABCC8/SRF/GAS6/NPTX1/ZBED6/CCDC186/GCLM/VSNL1	intracellular glucose homeostasis	123	-0.407298	-1.23649	0.17	1	1	3122	tags=19%, list=17%, signal=16%	SLC12A7/TIAM1/GPLD1/GHRL/ICAM1/CFTR/KCNJ11/GPER1/CPB2/SERPINF1/ADCY5/PPARGC1A/HK3/NR1D1/EPHA5/CLTRN/BRSK2/AGER/KCNB1/MLXIPL/ZBED6/ADRA2A/GPX1	0.0633803	0.220137	p1_0.0633802816901408	p3_0.220136518771331
GO:0001682	tRNA 5'-leader removal	12	0.368578	0.824358	0.730361	0.899297	0.794695	6925	tags=58%, list=34%, signal=38%	POP1/RPP40/POP7/RPP30/POP5/RPP14/POP4	tRNA 5'-leader removal	11	0.604488	1.39951	0.0900563	0.552512	0.514688	7248	tags=82%, list=35%, signal=54%	RPP40/POP5/POP4/POP1/POP7/SSB/RPP38/RPP30/RPP25	tRNA 5'-leader removal	12	0.280757	0.717123	0.818966	1	1	547	tags=8%, list=3%, signal=8%	RPP25	0.0900563	0.818966	p1_0.0900562851782364	p0_0.818965517241379
GO:0001696	gastric acid secretion	12	0.329935	0.73793	0.838641	0.94953	0.839085	1982	tags=25%, list=10%, signal=23%	GHRL/SNX10/CCKBR	gastric acid secretion	13	0.257875	0.627751	0.932458	0.984877	0.917454	2835	tags=15%, list=13%, signal=13%	SLC26A7/CHRM5	gastric acid secretion	8	0.448988	0.995197	0.443836	1	1	1034	tags=25%, list=6%, signal=24%	PTGER3/SNX10	0.443836	0.932458	p0_0.443835616438356	p1_0.932457786116323
GO:0001701	in utero embryonic development	376	-0.239334	-0.945996	0.613782	0.847003	0.748483	3550	tags=18%, list=18%, signal=15%	RSPO3/INPP5K/EGLN1/ETNK2/PSPH/PNLDC1/EPAS1/BCOR/SKIL/CCNB1IP1/CEBPB/MAFG/TCTN1/GATA1/GRHL2/WNT3A/COL3A1/BMP2/TMEM231/POU5F1/APOB/MAFF/SNAI1/TP53/TGFBR1/GJA1/FOXC1/PTPRR/FKBP10/CSF2/CDKN1A/EOMES/CHD7/HEG1/SPINT2/SMO/GATA6/ASCL2/RDH10/ARHGDIG/SOX8/HES1/PLG/FBLL1/KRT8/JAG2/PPP4R4/CAMSAP3/SPINT1/MYH6/VEGFA/MDFI/PCDH12/SOX17/LIF/GATA3/DSC3/UPB1/TIE1/HEY1/HAND2/SOX18/HAND1/MYO18B/EDN1/HEY2/PDGFB/ELF3	in utero embryonic development	393	0.239769	1.04854	0.284072	0.76363	0.711353	3391	tags=21%, list=16%, signal=18%	SLC25A20/HM13/CMIP/RRP7A/NOTCH1/PEMT/TAB1/MSX1/XAB2/GCM1/CASP8/RRM2/EMX1/TMEM231/BMP2/STIL/ASCL2/ZFPM2/DAD1/PRMT1/PCDH12/NSDHL/FBXW8/ACVRL1/MYH6/BYSL/RPGRIP1L/TIE1/DBN1/SALL4/SOX8/E2F8/CCNB1/ASF1B/TTLL1/GDF3/PCGF2/TGFBR1/PTCH1/LPAR6/STK3/ERCC2/RIC8A/AKAP3/BCL2L11/RDH10/WDR19/DHX35/CMTM3/WNT2/NOS3/NEK2/PSMC4/SLC30A1/ADAMTS3/RBM46/GRHL2/EMG1/ARNT/CCNB2/SLC39A3/JAG2/ST14/KAT2A/SLC39A1/CPT2/SKIL/ANKS…	in utero embryonic development	354	-0.177119	-0.567926	0.998982	1	1	4881	tags=22%, list=27%, signal=16%	CAPN2/NSRP1/CCNB1IP1/DNAJB6/VEGFA/KIDINS220/JUNB/CDKN1A/SLC35E2B/FOXC1/ZNF568/MBD3/YAP1/PTH1R/FGFR1/SLC25A34/TAF10/TFEB/POLB/KDM8/CCDC24/NASP/AMOT/SMAD4/GJA1/TBX3/EGFR/HAND2/EPB41L5/MYO18B/FBXW8/SOX17/UBR3/SPINT1/FGFR2/JAG2/ADM/IL10/ZFPM2/RSPO3/ADA/CITED1/PLK4/WNT7B/HNF1B/MAFF/ETV2/MSX1/NECAB1/SOCS3/TIE1/PCDH12/NOG/FLVCR1/TTLL4/ELF3/FOSL1/LIF/RDH10/C6/PTCH1/TET1/CELF4/NXN/KRT19/FZD5/WNT2/ANKS6/VA…	0.284072	0.998982	p1_0.284072249589491	p0_0.9989816700611
GO:0001702	gastrulation with mouth forming second	21	-0.393764	-1.02727	0.419847	0.729591	0.644728	4808	tags=33%, list=24%, signal=25%	ACVR1/ACVR2A/MEGF8/LRP5/CRB2/LHX1/FOXA2	gastrulation with mouth forming second	26	0.406768	1.17071	0.228782	0.718089	0.668929	2299	tags=35%, list=11%, signal=31%	ACVR2A/LHX1/OTX2/FOXA2/GDF3/PRICKLE1/FRS2/UGDH/ZBTB17	gastrulation with mouth forming second	20	-0.361847	-0.849523	0.657224	1	1	5158	tags=50%, list=28%, signal=36%	GDF3/RNF2/PRICKLE1/ACVR2B/LDB1/AMOT/SMAD4/PLPP3/ETS2/WNT5A	0.228782	0.657224	p1_0.228782287822878	p0_0.657223796033994
GO:0001704	formation of primary germ layer	119	-0.350302	-1.22626	0.104712	0.4127	0.364697	4862	tags=37%, list=24%, signal=28%	MAP2K1/ACVR1/ITGB5/LAMB1/ETV2/KDM6B/FN1/MMP2/EPHA2/WNT3/MMP14/INHBA/ITGAV/EXT2/COL11A1/MMP15/BMP4/TXNRD1/DKK1/WNT3A/POFUT2/COL5A2/CRB2/POU5F1/SNAI1/COL5A1/TBX19/GJA1/FOXC1/COL8A1/EOMES/ATOH8/COL4A2/GATA6/ITGA8/TAL1/LHX1/DUSP4/ITGB2/TBX20/MIXL1/SOX17/VTN/HAND1	formation of primary germ layer	125	-0.338925	-1.34464	0.0241912	0.261028	0.243158	4257	tags=29%, list=20%, signal=23%	SCX/HMGA2/BRD3/ITGB4/ITGAV/TBX19/COL4A2/ITGB5/COL12A1/TXNRD1/MMP2/FGFR1/LAMB1/COL7A1/SOX2/ITGA8/TBX20/BMPR1A/WNT5A/NODAL/HSBP1/FZD7/SMAD2/ATOH8/NOG/FOXC1/ITGA4/EXT2/POU5F1/LEF1/BMP7/SRF/NANOG/BMPR2/ETS2/ITGA7	formation of primary germ layer	105	-0.199937	-0.602032	0.977401	1	1	4268	tags=24%, list=24%, signal=18%	FGFR1/ITGB4/TAF10/GJA1/EPB41L5/SOX17/FGFR2/NANOG/ETS2/ITGA8/TXNRD1/HNF1B/ETV2/SOX7/TAL1/NOG/EYA2/LAMB3/ITGB3/VTN/COL7A1/WNT5A/SOX2/FOXF1/SFRP2	0.0241912	0.977401	p1_0.0241911544655583	p0_0.977401129943503
GO:0001706	endoderm formation	57	-0.463856	-1.44932	0.0291081	0.228581	0.201993	4862	tags=44%, list=24%, signal=33%	MAP2K1/ITGB5/LAMB1/FN1/MMP2/MMP14/INHBA/ITGAV/COL11A1/MMP15/DKK1/COL5A2/POU5F1/COL5A1/COL8A1/EOMES/COL4A2/GATA6/LHX1/DUSP4/ITGB2/TBX20/MIXL1/SOX17/VTN	endoderm formation	59	-0.306458	-1.06184	0.349057	0.809308	0.753904	4115	tags=32%, list=20%, signal=26%	HMGA2/BRD3/ITGAV/COL4A2/ITGB5/COL12A1/MMP2/LAMB1/COL7A1/SOX2/TBX20/NODAL/HSBP1/SMAD2/NOG/ITGA4/POU5F1/NANOG/ITGA7	endoderm formation	51	0.26882	0.974829	0.446701	1	1	1862	tags=18%, list=10%, signal=16%	DUSP4/COL5A1/MESP1/LAMA3/ITGA4/COL5A2/COL11A1/LAMB1/COL8A1	0.0291081	0.446701	p3_0.0291080995097233	p0_0.446700507614213
GO:0001707	mesoderm formation	66	-0.263913	-0.838003	0.78481	0.923798	0.816346	4568	tags=32%, list=23%, signal=25%	ETV2/KDM6B/EPHA2/WNT3/INHBA/EXT2/BMP4/TXNRD1/DKK1/WNT3A/POFUT2/CRB2/SNAI1/TBX19/GJA1/FOXC1/EOMES/ITGA8/TAL1/TBX20/HAND1	mesoderm formation	71	-0.363599	-1.29142	0.0660377	0.503679	0.469197	5348	tags=34%, list=25%, signal=25%	ACVR1/BMP4/MESP1/FGFR2/TBX6/SCX/HMGA2/ITGB4/TBX19/TXNRD1/FGFR1/ITGA8/TBX20/BMPR1A/WNT5A/NODAL/SMAD2/NOG/FOXC1/EXT2/LEF1/BMP7/SRF/BMPR2	mesoderm formation	56	-0.266329	-0.741569	0.813725	1	1	4268	tags=29%, list=24%, signal=22%	FGFR1/ITGB4/TAF10/GJA1/EPB41L5/FGFR2/ITGA8/TXNRD1/ETV2/TAL1/NOG/EYA2/ITGB3/WNT5A/FOXF1/SFRP2	0.0660377	0.813725	p1_0.0660377358490566	p0_0.813725490196078
GO:0001708	cell fate specification	90	-0.368477	-1.23391	0.135652	0.456875	0.403733	3230	tags=29%, list=16%, signal=24%	DKK1/DMRTA2/MNX1/TBR1/WNT3A/SHH/APC2/DHH/POU5F1/TBX19/ESRP1/FGF2/EOMES/MYT1L/SMO/FOXA1/TBX1/TBX15/ISL2/TBX20/ISL1/SOX17/MYL2/POU3F2/SOX18/FOXA2	cell fate specification	108	-0.262974	-1.00839	0.411192	0.833176	0.776138	3832	tags=25%, list=18%, signal=21%	TBX19/GLI3/SMAD4/RBPJ/PTCH2/POU4F1/FGFR1/SOX2/FOXI3/OLIG2/TBX20/DMRT3/EHMT2/BMPR1A/NODAL/FZD7/CHD3/POU3F2/TBX4/POU5F1/AR/TBX2/TBR1/NANOG/CDON/ISL1/ESRP1	cell fate specification	67	-0.216583	-0.616956	0.944976	1	1	4268	tags=33%, list=24%, signal=25%	NFIB/NFIA/MBD3/FGFR1/CDON/SMAD4/TBX3/TBX5/SOX17/ISL1/NANOG/LMO4/CHD3/HNF1B/GLI2/EYA2/TBX1/PTCH1/FOXA1/TBX4/SOX2/SFRP2	0.135652	0.944976	p3_0.135652173913043	p0_0.944976076555024
GO:0001709	cell fate determination	30	-0.460362	-1.28534	0.134078	0.453245	0.400526	3336	tags=33%, list=17%, signal=28%	BMP4/IFRD1/FOXG1/GATA6/HES1/JAG1/CYP26B1/ISL1/SOX17/GATA3	cell fate determination	42	-0.246685	-0.809221	0.784648	0.961646	0.895813	2200	tags=17%, list=10%, signal=15%	WNT1/PROX1/CYP26B1/TBX2/IFRD1/ISL1/MEF2C	cell fate determination	28	-0.210711	-0.525576	0.971272	1	1	1581	tags=46%, list=9%, signal=42%	KLF4/CTNNB1/DLL1/CDC42/HES1/IFRD1/DSCAML1/HOXA2/SOX17/ISL1/PTCH1/PROX1/GATA2	0.134078	0.971272	p3_0.134078212290503	p0_0.971272229822161
GO:0001710	mesodermal cell fate commitment	15	0.477677	1.14779	0.313402	0.650369	0.574721	2157	tags=20%, list=11%, signal=18%	SFRP2/EYA1/EYA2	mesodermal cell fate commitment	18	-0.318085	-0.862475	0.660377	0.927011	0.863549	6583	tags=44%, list=31%, signal=31%	SFRP2/SIX2/BMP4/MESP1/TBX6/FGFR1/BMPR1A/NODAL	mesodermal cell fate commitment	11	-0.33847	-0.709869	0.797823	1	1	1857	tags=18%, list=10%, signal=16%	EYA2/SFRP2	0.313402	0.797823	p3_0.31340206185567	p0_0.797822706065319
GO:0001711	endodermal cell fate commitment	14	-0.636865	-1.4884	0.0485437	0.310008	0.273949	3230	tags=36%, list=16%, signal=30%	DKK1/POU5F1/EOMES/GATA6/SOX17	endodermal cell fate commitment	15	-0.270479	-0.6943	0.901288	0.977807	0.910868	1084	tags=20%, list=5%, signal=19%	SOX2/POU5F1/NANOG	endodermal cell fate commitment	13	-0.367689	-0.789881	0.723147	1	1	6568	tags=69%, list=36%, signal=44%	GATA6/CTNNB1/CDC73/PAF1/RTF1/SOX17/NANOG/HNF1B/SOX2	0.0485437	0.901288	p3_0.0485436893203883	p1_0.901287553648069
GO:0001732	formation of cytoplasmic translation initiation complex	15	-0.402688	-0.958274	0.508704	0.78381	0.69264	8711	tags=60%, list=43%, signal=34%	EIF3K/EIF3D/EIF3M/EIF3G/EIF3H/EIF3E/EIF3L/EIF3F/EIF3CL	formation of cytoplasmic translation initiation complex	14	0.344929	0.850956	0.67433	0.929311	0.865691	3235	tags=21%, list=15%, signal=18%	EIF3J/EIF3I/EIF3B	formation of cytoplasmic translation initiation complex	15	0.174706	0.467807	0.990798	1	1	14952	tags=100%, list=83%, signal=17%	EIF3C/EIF3D/EIF3E/EIF3H/EIF3F/EIF3L/EIF3I/EIF3K/EIF3G/EIF3B/EIF3M/EIF3J/EIF5/EIF3A/EIF3CL	0.508704	0.990798	p3_0.508704061895551	p0_0.99079754601227
GO:0001736	establishment of planar polarity	35	0.313245	0.920694	0.605603	0.841745	0.743837	2197	tags=20%, list=11%, signal=18%	SAPCD2/SFRP2/WNT9B/FOXF2/FZD1/WNT5A/SFRP1	establishment of planar polarity	36	0.247525	0.768183	0.851718	0.967806	0.901552	4220	tags=25%, list=20%, signal=20%	CTHRC1/RPGRIP1L/TP63/PTK7/NPHP1/SEC24B/BRSK1/DVL1/TTC8	establishment of planar polarity	33	-0.42189	-1.0812	0.352168	1	1	1596	tags=21%, list=9%, signal=19%	FOXF2/FZD3/VANGL2/BRSK2/WNT5A/SFRP2/SFRP1	0.352168	0.851718	p0_0.352168199737188	p1_0.851717902350814
GO:0001738	morphogenesis of a polarized epithelium	58	-0.287282	-0.894344	0.638336	0.856134	0.756553	3493	tags=24%, list=17%, signal=20%	CELSR1/FZD6/SH3BP1/TCF15/SYNE4/FZD3/GRHL3/BRSK1/PTK7/BRSK2/LAMA1/CAMSAP3/ERBB4/VANGL2	morphogenesis of a polarized epithelium	59	-0.221814	-0.768556	0.867925	0.969296	0.902939	4264	tags=27%, list=20%, signal=22%	DLG3/DVL2/MYO9A/YAP1/IFT20/DLG5/ERBB4/FZD6/WNT9B/WNT5A/PKHD1/EXOC5/LAMA5/FUZ/FOXF2/CAMSAP3	morphogenesis of a polarized epithelium	52	-0.36995	-1.01762	0.41375	1	1	1596	tags=15%, list=9%, signal=14%	FOXF2/FZD3/VANGL2/BRSK2/WNT5A/FOXF1/SFRP2/SFRP1	0.41375	0.867925	p0_0.41375	p1_0.867924528301887
GO:0001754	eye photoreceptor cell differentiation	44	0.398928	1.23721	0.155462	0.485853	0.429341	3907	tags=39%, list=19%, signal=31%	CNTF/DSCAM/DIO3/TH/RP1/CABP4/NKD1/THY1/SOX9/NDP/PRDM1/TULP1/THRB/MFRP/CEP290/CRB1/NTRK2	eye photoreceptor cell differentiation	48	0.309727	1.01855	0.411439	0.833176	0.776138	3556	tags=33%, list=17%, signal=28%	NOTCH1/THY1/RPGRIP1L/SOX8/RDH13/DZANK1/NDP/TH/PAX6/SOX9/GNAT1/PDE6C/STAT3/TULP1/SAMD11/RORB	eye photoreceptor cell differentiation	31	0.387786	1.22766	0.160494	1	1	3030	tags=39%, list=17%, signal=32%	NDP/RP1/NTRK2/RPGRIP1L/RDH13/PRDM1/THY1/SAMD11/CABP4/SOX9/SOX8/DZANK1	0.155462	0.411439	p3_0.15546218487395	p1_0.411439114391144
GO:0001755	neural crest cell migration	54	-0.46285	-1.42021	0.0433108	0.294541	0.260282	1824	tags=24%, list=9%, signal=22%	SEMA5A/RADIL/SMO/SEMA3G/SEMA3D/SOX8/SEMA6B/TBX1/ERBB4/ISL1/HAND2/EDN1/SEMA5B	neural crest cell migration	57	-0.468851	-1.61221	0.00436761	0.109958	0.102431	2107	tags=34%, list=10%, signal=31%	SEMA4F/SEMA3D/PITX2/SEMA5A/EFNB1/SEMA4C/PHACTR4/SEMA3C/SEMA4B/LAMA5/KITLG/BMP7/RET/HTR2B/ISL1/SEMA3B/EDN1/GDNF/SEMA4G/SEMA3F	neural crest cell migration	45	0.311516	1.0904	0.298578	1	1	3393	tags=31%, list=19%, signal=25%	HTR2B/SEMA4B/SEMA5B/SEMA4F/SEMA5A/ACVR1/SEMA4C/EFNB1/BMP4/SEMA6C/SOX8/FN1/EDN1/NRP1	0.00436761	0.298578	p1_0.0043676149770754	p0_0.298578199052133
GO:0001756	somitogenesis	59	0.360071	1.16593	0.205011	0.545282	0.481857	2197	tags=24%, list=11%, signal=21%	CDX1/XRCC2/SFRP2/LEF1/COBL/MEOX2/NKD1/FOXF1/RBPJ/MYF6/WNT5A/ALDH1A2/DLL1/SFRP1	somitogenesis	65	-0.281481	-0.98414	0.488095	0.866504	0.807184	4025	tags=29%, list=19%, signal=24%	PLXNA2/TP53/SMAD4/RBPJ/ATM/MIB1/BMPR1A/WNT5A/FOXB1/ALDH1A2/FOXC1/SEMA3C/LRP6/PCDH8/MED12/EP300/LEF1/DLL3/XRCC2	somitogenesis	48	-0.322307	-0.878824	0.612579	1	1	4862	tags=31%, list=27%, signal=23%	LRP6/FOXC1/NRARP/ALDH1A2/TAF10/SMAD4/EPB41L5/AXIN2/NKX3-1/NKD1/WNT5A/COBL/FOXF1/SFRP2/SFRP1	0.205011	0.612579	p3_0.20501138952164	p0_0.612578616352201
GO:0001759	organ induction	22	0.334993	0.882819	0.627083	0.849692	0.75086	2509	tags=23%, list=12%, signal=20%	FGF10/ROBO2/WNT2/SIX1/FGF1	organ induction	22	0.391337	1.08201	0.350746	0.810408	0.754929	2039	tags=23%, list=10%, signal=21%	BMP2/SIX1/DKK1/FRS2/WNT2	organ induction	17	0.323149	0.883162	0.597315	1	1	3055	tags=35%, list=17%, signal=29%	SIX1/MESP1/FGF1/BMP4/WNT2B/ROBO1	0.350746	0.627083	p1_0.350746268656716	p3_0.627083333333333
GO:0001763	morphogenesis of a branching structure	193	-0.286784	-1.05765	0.310231	0.646453	0.57126	2370	tags=19%, list=12%, signal=17%	WNT4/HOXB13/NKX3-1/PAX8/SPRY1/MDK/FGF2/WT1/SLIT2/TNF/BCL11A/SPINT2/PDGFA/SMO/TGM2/RDH10/SOX8/LAMA1/FOXA1/COL4A1/SULF1/LHX1/CAV3/SPINT1/DDR1/VEGFA/KDR/NRARP/DLX2/NTN4/TBX20/HHIP/TIE1/TMEM59L/GDF7/EDN1/CCL11	morphogenesis of a branching structure	203	-0.233487	-0.98119	0.505938	0.874447	0.814584	4823	tags=30%, list=23%, signal=23%	FGFR2/GPC3/CASR/FKBPL/BCL2/CITED1/ADAMTS16/EGF/DAG1/GZF1/NPNT/TGM2/MECP2/PDGFA/GLI3/SMAD4/KRAS/DDR1/LGR4/MET/YAP1/DLX2/CCL11/FGF13/DLG5/FGFR1/MED1/TBX20/WNT9B/LRP5/RERE/WNT5A/HHIP/PKHD1/NOG/DLG1/CTNNBIP1/WNT1/FZD5/MDK/NTN4/NFATC4/PROX1/MAP3K13/SIX4/SEMA3C/GREB1L/LAMA5/PLXND1/TGM2/SPINT2/LEF1/AR/TBX2/BMP7/SRF/TNC/NKX2-1/EDN1/GDNF/ADM	morphogenesis of a branching structure	166	-0.262709	-0.814408	0.791622	1	1	4334	tags=31%, list=24%, signal=24%	YAP1/SPRY2/FGFR1/KRAS/BCL11A/SMAD4/TBX3/RBM15/DLL4/BTRC/PAK1/SPINT1/FGFR2/ADM/IL10/GZF1/RSPO3/NPNT/VDR/DCHS1/CITED1/EPHA7/HNF1B/NKX3-1/GLI2/SOCS3/TIE1/NKX2-1/NOG/TACSTD2/MYC/KDR/RDH10/GREM1/GREB1L/PTCH1/FGF7/FOXA1/TCF21/PROX1/FZD5/WNT2/WNT5A/FOXF1/SHOX2/FGF10/GPC3/HHIP/CAV3/SFRP2/SFRP1	0.310231	0.791622	p3_0.31023102310231	p0_0.791621911922664
GO:0001764	neuron migration	161	-0.247538	-0.897698	0.72449	0.8979	0.79346	2807	tags=19%, list=14%, signal=16%	COL3A1/CTNNA2/NTNG2/LRP12/ARHGEF2/FZD3/FOXG1/NTN1/FLRT2/DNER/TNN/GJA1/ABI3/MDK/EOMES/GFRA3/NRG3/UNC5D/FYN/SPOCK1/LHX1/VEGFA/TBX20/DDIT4/DCDC2/CXCR4/GATA3/CCR4/CX3CL1/NRCAM	neuron migration	173	-0.242073	-1.00187	0.449438	0.846956	0.788975	3761	tags=23%, list=18%, signal=19%	SRGAP2/ABI2/NSMF/FKRP/ASTN1/FGF13/IGSF10/POU4F1/NEUROD4/FGFR1/CAMK2A/NIPBL/MAP1B/PCM1/CX3CL1/TBX20/TOP2B/UNK/AXL/NRCAM/DISC1/MDK/USP9X/RAPGEF2/TUBB2B/DCC/DRD1/NTNG2/SOX14/AUTS2/SRF/GAS6/DDIT4/SATB2/NKX2-1/MEF2C/FAT3/CCK/UNC5D/UNC5C	neuron migration	138	0.231025	1.00292	0.421053	1	1	1903	tags=17%, list=11%, signal=15%	CXCR4/MDK/DISC1/DNAAF4/CAMK2B/DDIT4/TRIM46/GATA3/NTRK2/ADGRG1/GAS6/NRG3/TBC1D24/MATN2/NEO1/LHX6/ASTN2/CXCL12/MDGA1/NDE1/COL3A1/SHTN1/LRP12	0.421053	0.72449	p0_0.421052631578947	p3_0.724489795918367
GO:0001765	membrane raft assembly	11	0.508975	1.12836	0.306122	0.641919	0.567254	5445	tags=73%, list=27%, signal=53%	CAV1/EMP2/CAV2/ANXA2/S100A10/FLOT1/LRCH4/COL6A1	membrane raft assembly	10	0.314707	0.717467	0.839319	0.966197	0.900053	7822	tags=40%, list=37%, signal=25%	RFTN1/ANXA2/PACSIN2/CAV1	membrane raft assembly	11	-0.476057	-0.99843	0.460342	1	1	379	tags=27%, list=2%, signal=27%	CAV2/CAV1/CAV3	0.306122	0.839319	p3_0.306122448979592	p1_0.839319470699433
GO:0001767	establishment of lymphocyte polarity	15	-0.445997	-1.06134	0.386847	0.706744	0.624539	1067	tags=27%, list=5%, signal=25%	CCL21/CCR7/CCL19/CYP26B1	establishment of lymphocyte polarity	15	0.385582	0.976523	0.488806	0.866504	0.807184	2149	tags=20%, list=10%, signal=18%	CCL19/CRTAM/CCL21	establishment of lymphocyte polarity	16	-0.288687	-0.653965	0.873199	1	1	2236	tags=19%, list=12%, signal=16%	FLOT2/CCL19/CCL21	0.386847	0.873199	p3_0.386847195357834	p0_0.873198847262248
GO:0001768	establishment of T cell polarity	14	-0.455538	-1.06463	0.392233	0.710976	0.628279	1067	tags=29%, list=5%, signal=27%	CCL21/CCR7/CCL19/CYP26B1	establishment of T cell polarity	14	0.393386	0.970501	0.501916	0.872468	0.81274	2149	tags=21%, list=10%, signal=19%	CCL19/CRTAM/CCL21	establishment of T cell polarity	15	-0.294399	-0.657019	0.866864	1	1	2236	tags=20%, list=12%, signal=18%	FLOT2/CCL19/CCL21	0.392233	0.866864	p3_0.392233009708738	p0_0.866863905325444
GO:0001771	immunological synapse formation	14	-0.363039	-0.848451	0.687379	0.880268	0.777879	2339	tags=29%, list=12%, signal=25%	NEDD9/CCL21/CCR7/CCL19	immunological synapse formation	16	0.406985	1.03979	0.42803	0.842296	0.784634	2316	tags=24%, list=11%, signal=21%	CCL19/MSN/CCL21/CD81	immunological synapse formation	16	-0.41185	-0.932965	0.553314	1	1	1424	tags=25%, list=8%, signal=23%	EPHB1/CCL19/PRF1/CCL21	0.42803	0.687379	p1_0.428030303030303	p3_0.687378640776699
GO:0001773	myeloid dendritic cell activation	25	0.554839	1.52195	0.0389904	0.274118	0.242234	1791	tags=36%, list=9%, signal=33%	IRF4/TSPAN32/HAVCR2/IL10/BATF3/CAMK4/DOCK2/RBPJ/HMGB1	myeloid dendritic cell activation	28	-0.396241	-1.18955	0.203905	0.700038	0.652114	4142	tags=36%, list=20%, signal=29%	IRF4/CAMK4/RBPJ/UBD/IL4/ITGB6/BATF2/TRAF6/ITGB8/RELB	myeloid dendritic cell activation	24	0.43829	1.3246	0.115108	1	1	1983	tags=29%, list=11%, signal=26%	BATF/SLAMF1/CAMK4/CD2/BATF2/CLEC4D/IRF4	0.0389904	0.203905	p3_0.0389903616066475	p1_0.203904555314534
GO:0001774	microglial cell activation	41	-0.627663	-1.84445	0.00147621	0.0374632	0.0331057	4379	tags=56%, list=22%, signal=44%	TTBK1/SPHK1/TLR3/NAGLU/CX3CR1/SYT11/LDLR/TYROBP/APP/AIF1/TREM2/GRN/IFNGR1/C5AR1/TNF/IL33/TLR9/PTPRC/ITGB2/AZU1/IL13/CX3CL1/IL6	microglial cell activation	44	0.33747	1.08765	0.327747	0.795899	0.741413	203	tags=7%, list=1%, signal=7%	CTSC/IL33/SPHK1	microglial cell activation	40	-0.363527	-0.955995	0.505806	1	1	3214	tags=22%, list=18%, signal=19%	CST7/IL33/SNCA/CX3CR1/NR1D1/MAPT/AGER/LDLR/IL6	0.00147621	0.505806	p3_0.00147620643231667	p0_0.505806451612903
GO:0001776	leukocyte homeostasis	99	-0.289541	-0.984355	0.5	0.779634	0.688951	3388	tags=21%, list=17%, signal=18%	FOXP3/SKIL/CCR2/SASH3/SH2B2/CSF1/PIK3CD/GCNT4/ADAM17/TSC22D3/BTK/LGALS9/FLT3/LYN/TNFAIP3/IL20RB/LMO1/SLC7A11/TNFSF14/IL6/CXCL6	leukocyte homeostasis	105	0.308852	1.17215	0.174204	0.680931	0.634315	3174	tags=24%, list=15%, signal=20%	LMO1/AIM2/ANXA1/MIR17HG/RIPK3/BAK1/SIT1/SPNS2/CASP3/MTHFD1/ITPKB/BCL2L11/NKX2-3/CCNB2/SLC39A3/GPAM/HMGB1/SLC15A4/SKIL/RAG1/SLC46A2/TNFSF13B/SH2B3/SOS1/CCR2/CD74	leukocyte homeostasis	96	0.31259	1.2767	0.081872	1	1	2960	tags=25%, list=16%, signal=21%	F2R/SIT1/IL7R/BCL2L11/TNFAIP3/BCL2/LGALS9/CCR2/TSC22D3/JAK3/CD74/PMAIP1/DNAJA3/BAX/CORO1A/WDR37/CHST3/BTK/GPR174/P2RX7/BAK1/PACS1/TRAF3IP2/LAT	0.081872	0.5	p0_0.0818719540644607	p3_0.5
GO:0001778	plasma membrane repair	27	-0.41589	-1.13335	0.26454	0.610275	0.539291	1108	tags=26%, list=5%, signal=25%	CHMP5/CHMP1B/SMPD1/SYT11/CHMP4C/CAV3/TRIM72	plasma membrane repair	27	-0.21853	-0.653228	0.949891	0.990488	0.92268	1503	tags=22%, list=7%, signal=21%	MYOF/SMPD1/CHMP2A/CHMP4A/CHMP3/SYT11	plasma membrane repair	25	-0.442154	-1.08795	0.332418	1	1	882	tags=8%, list=5%, signal=8%	RAB3A/CAV3	0.26454	0.949891	p3_0.264540337711069	p1_0.949891067538126
GO:0001779	natural killer cell differentiation	19	-0.333623	-0.846289	0.67433	0.873773	0.77214	2633	tags=32%, list=13%, signal=27%	TUSC2/GAS6/IL15RA/PIK3CD/PTPRC/RASGRP1	natural killer cell differentiation	24	-0.283021	-0.814747	0.776053	0.959897	0.894184	5951	tags=46%, list=28%, signal=33%	PGLYRP1/PBX1/TUSC2/PIK3CD/STAT5B/IL15/SP3/ZBTB1/AXL/NFIL3/GAS6	natural killer cell differentiation	22	0.334556	0.991536	0.465035	1	1	4567	tags=36%, list=25%, signal=27%	SLAMF1/GAS6/PRDM1/ZNF683/PTPRC/PGLYRP2/PIK3CD/TOX	0.465035	0.776053	p0_0.465034965034965	p1_0.776053215077605
GO:0001780	neutrophil homeostasis	20	-0.448405	-1.15591	0.284069	0.623442	0.550926	3128	tags=35%, list=15%, signal=30%	CCR2/CSF1/PIK3CD/GCNT4/BTK/SLC7A11/IL6	neutrophil homeostasis	21	0.366067	1.00783	0.430939	0.842296	0.784634	4021	tags=32%, list=19%, signal=26%	ANXA1/MTHFD1/ITPKB/HMGB1/SH2B3/CCR2/CXCR2	neutrophil homeostasis	20	-0.316856	-0.743896	0.790368	1	1	263	tags=10%, list=1%, signal=10%	HCAR2/IL6	0.284069	0.790368	p3_0.284069097888676	p0_0.790368271954674
GO:0001782	B cell homeostasis	32	0.301428	0.870438	0.715217	0.894022	0.790033	1882	tags=12%, list=9%, signal=11%	CD74/IL7R/DOCK10/MIR17HG	B cell homeostasis	33	-0.291749	-0.90229	0.619687	0.916355	0.853623	1136	tags=29%, list=5%, signal=28%	BCL2/SH2B2/PPP2R3C/RC3H2/MIF/LYN/CAMLG/RC3H1/TNFRSF13B/MEF2C	B cell homeostasis	31	0.384476	1.21718	0.168724	1	1	2926	tags=26%, list=16%, signal=22%	IL7R/BCL2L11/TNFAIP3/BCL2/CD74/BAX/BAK1/TRAF3IP2	0.168724	0.715217	p0_0.168724279835391	p3_0.715217391304348
GO:0001783	B cell apoptotic process	24	0.369718	0.99883	0.468041	0.758552	0.670321	582	tags=12%, list=3%, signal=12%	AURKB/IL10/CD74	B cell apoptotic process	26	0.300199	0.863997	0.688192	0.933194	0.869308	5281	tags=37%, list=25%, signal=28%	MIR17HG/AURKB/BAK1/CD74/FNIP1/SLC39A10/PDCD1/ADA/IL2/NOC2L	B cell apoptotic process	24	0.461492	1.39472	0.0971223	1	1	4402	tags=54%, list=24%, signal=41%	PDCD1/BCL2/CD74/BAX/BTK/BAK1/NOC2L/TRAF3IP2/LYN/TNFRSF21/BCL6/BCL10/CRKL	0.0971223	0.688192	p0_0.0971223021582734	p1_0.688191881918819
GO:0001787	natural killer cell proliferation	12	0.412368	0.9223	0.579618	0.82675	0.730587	1440	tags=25%, list=7%, signal=23%	IL12B/IL18/EMP2	natural killer cell proliferation	15	0.465065	1.17782	0.261194	0.750559	0.699177	177	tags=7%, list=1%, signal=7%	PTPN22	natural killer cell proliferation	13	0.537354	1.3975	0.123167	1	1	4206	tags=62%, list=23%, signal=47%	SLAMF1/PTPN22/FCGR3A/IL23A/TYK2/HLA-E/IL23R/ELF4	0.123167	0.579618	p0_0.12316715542522	p3_0.579617834394904
GO:0001818	negative regulation of cytokine production	253	-0.352543	-1.34519	0.0153604	0.158822	0.140349	2051	tags=21%, list=10%, signal=19%	DHX58/INHA/F2/THBS1/PLA2G10/CHRNA7/HDAC9/CD33/TNF/BTK/TSKU/CR1/LGALS9/ZFPM1/NDRG2/PRNP/OAS1/TNFAIP3/GATA6/XAF1/NLRP12/IL33/CD200/RELB/IL20RB/LAPTM5/IFNB1/MIR214/PTPRC/INHBB/SFTPD/ZC3H12A/TGFB2/SRGN/CCR7/INPP5D/HLA-F/IL13/LTF/GBP7/TLR4/CD34/NLRP3/DDIT3/BST2/IL1RL1/GATA3/CX3CL1/IL23A/APOA1/NOD2/CEACAM1/IL36RN/IL6	negative regulation of cytokine production	279	0.21082	0.895558	0.806612	0.964926	0.898868	3914	tags=18%, list=19%, signal=15%	CMKLR1/LAPTM5/IL33/PTPN22/HGF/PRNP/IL27RA/ANXA1/TGFB1/IL1RL1/RNF128/TSKU/PLA2G10/PDCD1LG2/ITCH/SRGN/F2RL1/LAPTM4B/FOXJ1/TIGIT/NDFIP1/CASP3/ASB1/SLC2A10/NDRG2/NLRC3/MC1R/TNFSF4/GHSR/C1QBP/HSP90AB1/MORC3/HMGB1/CD200/DLL1/MUL1/DDX56/KLF2/INHBB/IL12A/INPP5D/TBX21/POMC/BANF1/HAVCR2/HFE/SIRPA/IFNG/SERPINB1/CHRNA7	negative regulation of cytokine production	245	0.254016	1.2002	0.0882021	1	1	3635	tags=31%, list=20%, signal=25%	TREM2/CCR7/F2RL1/HFE/SLAMF1/GPNMB/PTPN6/EPHA2/IL27RA/CMKLR1/OAS3/CD33/TNFAIP3/CD200R1/SSC5D/GATA3/LGALS9/XAF1/TLR4/GAS6/NLRC3/BST2/ADCY7/EZH2/OAS1/TGFB1/CD83/IFNG/CD96/SLC2A10/FCGR2B/LILRA4/TRIB2/JAK3/DHX58/CR1/ACP5/LILRB1/PTPN22/IDO1/HLA-DRB1/CD200/PML/NPTN/SRGN/FFAR4/CEACAM1/LEF1/LAPTM5/LILRB4/MAPKBP1/BTK/CHID1/HDAC9/SMAD7/POMC/LAG3/IL23A/IRAK3/SELENOS/TIGIT/APPL2/PDCD1LG2/VSIR/FN1/C5AR2/RARA/S…	0.0153604	0.806612	p3_0.0153604310666804	p1_0.806611570247934
GO:0001820	serotonin secretion	9	-0.410547	-0.871961	0.648	0.860809	0.760684	378	tags=33%, list=2%, signal=33%	SYK/SLC6A4/P2RX1	serotonin secretion	11	0.428104	0.991147	0.469043	0.853963	0.795502	321	tags=9%, list=2%, signal=9%	SLC18A2	serotonin secretion	7	-0.678744	-1.31857	0.154589	1	1	1318	tags=57%, list=7%, signal=53%	SLC18A2/SYK/SLC6A4/CNR1	0.154589	0.648	p0_0.154589371980676	p3_0.648
GO:0001821	histamine secretion	11	-0.679819	-1.51519	0.0546875	0.315911	0.279165	4029	tags=64%, list=20%, signal=51%	SNAP23/PLA2G3/CSF2/BTK/LYN/RAB44/EDN1	histamine secretion	11	0.397018	0.919175	0.575985	0.907327	0.845213	1718	tags=27%, list=8%, signal=25%	SLC18A2/SNAP23/PLA2G3	histamine secretion	8	0.371322	0.823048	0.682192	1	1	3479	tags=38%, list=19%, signal=30%	BTK/EDN1/LYN	0.0546875	0.682192	p3_0.0546875	p0_0.682191780821918
GO:0001822	kidney development	295	-0.357626	-1.38295	0.00617252	0.0991128	0.0875844	2806	tags=23%, list=14%, signal=20%	SHH/CTNS/KIF26B/FBN1/ADAMTS6/TFAP2B/BMP2/BMPER/GLIS2/ID3/GCNT4/STAT1/WNT4/ACTA2/PCSK5/NKX3-1/TGFBR1/PAX8/FOXC1/SPRY1/FGF2/WT1/SLIT2/PECAM1/PTK7/DDC/NOTCH3/GPR4/PDGFA/ANGPT2/SMO/PTPRO/RDH10/SOX8/LIN28A/HES1/ITGA8/CYP26A1/CRLF1/SULF1/KLF15/LHX1/TGFB2/PDGFD/JAG1/CYP26B1/FRAS1/VEGFA/SULF2/ERBB4/PCSK9/CD34/SOX17/LIF/IRX1/GDF6/GATA3/DACT2/TMEM59L/HEYL/PROM1/EDN1/TFAP2A/COL4A3/COL4A4/VANGL2/BMP6/PDGFB	kidney development	314	0.234464	1.00584	0.437396	0.843237	0.78551	3234	tags=18%, list=15%, signal=15%	RARB/LHX1/WNK4/NOTCH1/PECAM1/ZMPSTE24/STRA6/NUP160/HAS2/BMP2/SEC61A1/SIX1/ANGPT2/NKX3-1/ITGB3/IL6R/OSR2/FOXJ1/RPGRIP1L/JMJD6/SOX8/C1GALT1/NPHP3/COL4A3/SDC4/PTK7/TGFBR1/PTCH1/COMT/GCNT1/HPGD/APH1A/TREX1/BCL2L11/RDH10/IRX3/CC2D2A/NUP85/CFLAR/ACTA2/HES5/BICC1/SERPINF1/OVOL1/DCHS2/HEYL/ANKS6/DLL1/SOX9/SMAD5/HYAL2/SDC1/SERPINB7/CRLF1/PTCD2/HES1	kidney development	260	-0.19587	-0.624267	0.992806	1	1	4334	tags=25%, list=24%, signal=19%	YAP1/FMN1/PDGFRB/FGFR1/MPST/HYAL2/ARID5B/SMAD4/UPK3A/CEP290/KCNJ8/OSR2/SOX17/FGFR2/TGFB2/MMP17/AQP2/AGTR1/GZF1/ACTA2/OSR1/NPNT/COL4A4/ITGA8/CASP9/CD34/DCHS1/CD24/CITED1/EPHA7/GDF6/WNT7B/HNF1B/SDC1/NKX3-1/GLI2/HPGD/NOG/TACSTD2/ROBO2/MYC/SERPINF1/LIF/RDH10/GREM1/GREB1L/PTCH1/ADAMTS1/IRX3/VANGL2/EPCAM/TCF21/PROX1/ITGB3/ANKS6/WNT5A/AQP11/GFRA1/IRX2/FGF10/GPC3/MME/HAS2/SFRP1	0.00617252	0.992806	p3_0.00617251538853465	p0_0.992805755395683
GO:0001823	mesonephros development	96	0.270179	0.946737	0.56422	0.814186	0.719483	2509	tags=21%, list=12%, signal=18%	FGF10/FMN1/NPNT/FGFR2/WNT9B/EYA1/ROBO2/HOXB7/AGT/DCHS1/FOXD1/SDC1/BMP7/SIX1/SOX9/SFRP1/GLI3/OSR2/HS3ST3A1/FGF1	mesonephros development	104	0.21067	0.798548	0.897306	0.976832	0.90996	1603	tags=9%, list=8%, signal=8%	RARB/LHX1/BMP2/SIX1/OSR2/FOXJ1/SOX8/SDC4/PTCH1	mesonephros development	81	-0.251733	-0.733059	0.839013	1	1	3262	tags=36%, list=18%, signal=29%	SLIT2/HS2ST1/ILK/VEGFA/FOXC1/FMN1/FGFR1/SMAD4/OSR2/FGFR2/GZF1/OSR1/NPNT/DCHS1/CITED1/HNF1B/SDC1/NOG/TACSTD2/ROBO2/MYC/GREM1/GREB1L/PTCH1/EPCAM/TCF21/FGF10/GPC3/SFRP1	0.56422	0.897306	p3_0.564220183486238	p1_0.897306397306397
GO:0001824	blastocyst development	107	0.36944	1.31027	0.0586907	0.320565	0.283279	1727	tags=15%, list=9%, signal=14%	HOPX/NEK2/RRM2/ASF1B/RBM46/STMN3/GINS4/NCAPG2/ACVR1C/GINS1/NPM2/BRCA2/ST8SIA6/HORMAD1/CHEK1/NASP	blastocyst development	115	-0.224251	-0.873576	0.74942	0.954402	0.889065	3411	tags=23%, list=16%, signal=19%	PELO/FBLL1/SPECC1/HORMAD1/YAP1/SLC25A34/MED21/GABPA/HOPX/NODAL/ELF3/CITED2/CCDC62/NDUFA2/ZP3/TM4SF1/KDM4C/PNLDC1/POU5F1/NASP/SRF/LATS2/ZBED6/SLC35E2B/TET1/CCNB1IP1	blastocyst development	98	-0.1901	-0.564554	0.988506	1	1	6645	tags=36%, list=37%, signal=23%	CHEK1/KLF4/GINS4/RPL7L1/RTN4/PALB2/NCAPG2/SPECC1/CNOT2/INTS1/CNOT1/PHF6/LATS2/MED21/PPP1CC/RTF1/ARHGDIG/CAPN2/CCNB1IP1/JUNB/SLC35E2B/YAP1/SLC25A34/CCDC24/NASP/SOX17/ADA/HNF1B/ETV2/NECAB1/TTLL4/ELF3/TET1/IGF1/ZBED6	0.0586907	0.988506	p3_0.0586907449209932	p0_0.988505747126437
GO:0001825	blastocyst formation	41	0.2673	0.820335	0.785563	0.923909	0.816444	506	tags=5%, list=3%, signal=5%	HOPX/RBM46	blastocyst formation	44	-0.408272	-1.35047	0.0774194	0.526344	0.490311	2806	tags=27%, list=13%, signal=24%	GABPA/HOPX/NODAL/CITED2/ZP3/TM4SF1/KDM4C/PNLDC1/SRF/LATS2/TET1/CCNB1IP1	blastocyst formation	38	-0.143099	-0.375968	1	1	1	6448	tags=32%, list=36%, signal=20%	RPL7L1/RTN4/CNOT2/CNOT1/LATS2/CCNB1IP1/JUNB/YAP1/SOX17/ADA/HNF1B/TET1	0.0774194	1	p1_0.0774193548387097	p0_1
GO:0001829	trophectodermal cell differentiation	17	0.45405	1.12312	0.30625	0.642057	0.567376	506	tags=12%, list=3%, signal=11%	HOPX/RBM46	trophectodermal cell differentiation	19	-0.311265	-0.849277	0.69936	0.936552	0.872437	3391	tags=26%, list=16%, signal=22%	YAP1/HOPX/NODAL/CITED2/SRF	trophectodermal cell differentiation	15	0.360311	0.9648	0.48773	1	1	2026	tags=20%, list=11%, signal=18%	CITED2/HOPX/TEAD4	0.30625	0.69936	p3_0.30625	p1_0.699360341151386
GO:0001832	blastocyst growth	21	0.667858	1.74865	0.0058497	0.094955	0.0839103	1511	tags=29%, list=7%, signal=26%	GINS4/NCAPG2/ACVR1C/GINS1/BRCA2/CHEK1	blastocyst growth	22	0.373658	1.03313	0.41791	0.83603	0.778797	5756	tags=36%, list=27%, signal=26%	SALL4/GINS1/NCAPG2/CHEK1/ZPR1/SBDS/GINS4/RTF1	blastocyst growth	20	-0.365528	-0.858164	0.647309	1	1	326	tags=35%, list=2%, signal=34%	CHEK1/GINS4/PALB2/NCAPG2/INTS1/RTF1/IGF1	0.0058497	0.647309	p3_0.00584970418528149	p0_0.647308781869688
GO:0001833	inner cell mass cell proliferation	14	0.738657	1.74218	0.00251617	0.0540923	0.0478006	1511	tags=36%, list=7%, signal=33%	GINS4/NCAPG2/GINS1/BRCA2/CHEK1	inner cell mass cell proliferation	14	0.504532	1.2447	0.195402	0.689643	0.642431	5168	tags=50%, list=25%, signal=38%	SALL4/GINS1/NCAPG2/CHEK1/ZPR1/SBDS/GINS4	inner cell mass cell proliferation	13	0.328435	0.854163	0.621701	1	1	12169	tags=100%, list=67%, signal=33%	GINS1/NDEL1/COPS2/TAF8/BRCA2/ZPR1/PELO/SBDS/CHEK1/GINS4/PALB2/NCAPG2/INTS1	0.00251617	0.621701	p3_0.0025161650504771	p0_0.621700879765396
GO:0001835	blastocyst hatching	24	0.326829	0.882961	0.637113	0.855376	0.755883	1251	tags=12%, list=6%, signal=12%	ASF1B/STMN3/ST8SIA6	blastocyst hatching	25	0.305753	0.868954	0.67031	0.927763	0.86425	1973	tags=20%, list=9%, signal=18%	PEMT/ASF1B/LPAR6/AKAP3/CMTM3	blastocyst hatching	20	-0.268178	-0.629613	0.909348	1	1	229	tags=30%, list=1%, signal=30%	ARHGDIG/SLC35E2B/SLC25A34/CCDC24/NECAB1/ZBED6	0.637113	0.909348	p3_0.637113402061856	p0_0.909348441926346
GO:0001836	release of cytochrome c from mitochondria	53	-0.201995	-0.616097	0.983395	1	0.883684	3380	tags=15%, list=17%, signal=13%	MOAP1/FAM162A/FZD9/TP53/BBC3/BNIP3/SOD2/IFI6	release of cytochrome c from mitochondria	54	-0.254732	-0.872939	0.696145	0.936099	0.872015	2457	tags=30%, list=12%, signal=26%	FZD9/BAD/BCL2/PDCD5/MFF/OPA1/TP53/BOK/HRK/BMF/GPX1/NOL3/BBC3/FAM162A/SOD2/BNIP3	release of cytochrome c from mitochondria	52	-0.505565	-1.39065	0.12	1	1	825	tags=6%, list=5%, signal=6%	BOK/IGF1/GPX1	0.12	0.983395	p0_0.12	p3_0.983394833948339
GO:0001837	epithelial to mesenchymal transition	159	-0.287804	-1.04355	0.37884	0.700823	0.619306	2822	tags=18%, list=14%, signal=16%	POFUT2/MSX2/BMP2/CRB2/SNAI1/WNT4/TGFBR1/FOXC1/SPRY1/MDK/LOXL2/EOMES/LOXL3/FOXA1/TGFB2/JAG1/BAMBI/TBX20/LDLRAD4/GATA3/HEY1/HEYL/EDN1/HPN/HEY2/EFNA1/IL6/FOXA2/IL1B	epithelial to mesenchymal transition	163	0.2442	0.978907	0.501767	0.872468	0.81274	2288	tags=13%, list=11%, signal=11%	WNT8A/TIAM1/HGF/OLFM1/NOTCH1/MSX1/TGFB1/HAS2/BMP2/PDPN/FOXA2/FAM83D/NOTCH4/SPRED2/TGFBR1/COL1A1/EFNA1/WNT2/EPHA3/ELL3/LOXL3	epithelial to mesenchymal transition	153	-0.261942	-0.808224	0.78821	1	1	4650	tags=29%, list=26%, signal=22%	FOXC1/HGF/TRIM62/CLASP2/SPRY2/FGFR1/PPP2CA/SMAD4/TBX3/TBX5/DACT3/GLIPR2/EPB41L5/FGFR2/TGFB2/FERMT2/FLNA/SLC39A10/BAMBI/POLR1B/AXIN2/TIAM1/PHLDB2/MARK1/EFNA1/ALX1/TGFBR3/MSX1/LRG1/NKX2-1/HPN/NOG/OLFM1/GREM1/FOXF2/FOXA1/WNT2/WNT5A/PDPN/BMP5/SFRP2/IGF1/IL6/HAS2/SFRP1	0.37884	0.78821	p3_0.378839590443686	p0_0.7882096069869
GO:0001838	embryonic epithelial tube formation	116	-0.27226	-0.947161	0.575	0.822841	0.727132	2389	tags=14%, list=12%, signal=12%	FZD3/WNT4/RALA/GRHL3/PAX8/PTK7/SPINT2/SOX8/TGFB2/SPINT1/IRX1/GATA3/CECR2/HAND1/GDF7/VANGL2	embryonic epithelial tube formation	123	-0.29475	-1.16622	0.157895	0.666728	0.621085	2800	tags=23%, list=13%, signal=20%	FZD6/IFT52/WNT9B/MIB1/WNT5A/NODAL/NOG/CITED2/DLC1/MTHFD1L/TRAF6/MTHFR/SEMA4C/ARHGAP35/SIX4/IRX1/PHACTR4/IFT57/MED12/SPINT2/FUZ/IFT172/BMP7/KDM2B/RET/GDNF/DEAF1/CECR2/ADM	embryonic epithelial tube formation	105	-0.258678	-0.778909	0.79322	1	1	1872	tags=13%, list=10%, signal=12%	NOG/CECR2/GREM1/PTCH1/IRX3/FZD3/VANGL2/FOLR1/WNT5A/COBL/IRX2/BMP5/SFRP2/SFRP1	0.157895	0.79322	p1_0.157894736842105	p0_0.793220338983051
GO:0001841	neural tube formation	98	0.241997	0.848752	0.799539	0.929906	0.821744	2463	tags=14%, list=12%, signal=13%	BMP5/KIF20B/SFRP2/COBL/STIL/ST14/FZD1/RGMA/LHX2/WNT5A/BMP7/SFRP1/TWIST1/MTHFD1	neural tube formation	102	-0.292422	-1.11422	0.26555	0.750801	0.699402	2800	tags=23%, list=13%, signal=20%	FZD6/IFT52/MIB1/WNT5A/NODAL/NOG/CITED2/DLC1/MTHFD1L/TRAF6/MTHFR/SEMA4C/ARHGAP35/PHACTR4/IFT57/MED12/SPINT2/FUZ/IFT172/BMP7/KDM2B/DEAF1/CECR2/ADM	neural tube formation	92	-0.265174	-0.784238	0.768966	1	1	1872	tags=12%, list=10%, signal=11%	NOG/CECR2/PTCH1/FZD3/VANGL2/FOLR1/WNT5A/COBL/BMP5/SFRP2/SFRP1	0.26555	0.799539	p1_0.26555023923445	p3_0.799539170506912
GO:0001843	neural tube closure	87	0.215377	0.741843	0.958716	0.997966	0.881887	2463	tags=14%, list=12%, signal=12%	KIF20B/SFRP2/COBL/STIL/ST14/FZD1/RGMA/LHX2/WNT5A/SFRP1/TWIST1/MTHFD1	neural tube closure	89	-0.286249	-1.0696	0.310427	0.783621	0.729975	2800	tags=22%, list=13%, signal=19%	FZD6/WNT5A/NOG/CITED2/DLC1/MTHFD1L/TRAF6/MTHFR/SEMA4C/ARHGAP35/PHACTR4/IFT57/MED12/SPINT2/FUZ/IFT172/KDM2B/DEAF1/CECR2/ADM	neural tube closure	82	-0.261407	-0.761482	0.804476	1	1	1872	tags=12%, list=10%, signal=11%	NOG/CECR2/PTCH1/FZD3/VANGL2/FOLR1/WNT5A/COBL/SFRP2/SFRP1	0.310427	0.958716	p1_0.31042654028436	p3_0.958715596330275
GO:0001845	phagolysosome assembly	19	0.488634	1.24948	0.158333	0.489586	0.43264	2552	tags=21%, list=13%, signal=18%	PLA2G5/P2RX7/CORO1A/RAB7B	phagolysosome assembly	19	-0.361629	-0.986692	0.477612	0.858922	0.800122	1778	tags=26%, list=8%, signal=24%	RAB20/MYO7A/PIKFYVE/SPG11/SRPX	phagolysosome assembly	18	-0.323084	-0.753017	0.772346	1	1	5372	tags=33%, list=30%, signal=23%	RAB39A/PLA2G5/RAB20/SRPX/MYO7A/CLN3	0.158333	0.772346	p3_0.158333333333333	p0_0.772346368715084
GO:0001865	NK T cell differentiation	9	0.525486	1.10904	0.340637	0.670346	0.592374	4037	tags=33%, list=20%, signal=27%	TOX/PRDM1/ITK	NK T cell differentiation	11	0.456089	1.05594	0.382739	0.81437	0.75862	293	tags=9%, list=1%, signal=9%	ZBTB7B	NK T cell differentiation	11	0.563195	1.40213	0.122563	1	1	5406	tags=55%, list=30%, signal=38%	ITK/PRDM1/ZNF683/TOX/ATF2/TGFBR2	0.122563	0.382739	p0_0.122562674094708	p1_0.382739212007505
GO:0001867	complement activation, lectin pathway	6	0.564017	1.07989	0.380952	0.702181	0.620506	1651	tags=33%, list=8%, signal=31%	A2M/MASP1	complement activation, lectin pathway	11	0.27843	0.644619	0.921201	0.982657	0.915385	1283	tags=9%, list=6%, signal=9%	FCN2	complement activation, lectin pathway	7	-0.582701	-1.13199	0.334944	1	1	430	tags=43%, list=2%, signal=42%	KRT1/FCN1/FCN3	0.334944	0.921201	p0_0.334943639291465	p1_0.921200750469043
GO:0001881	receptor recycling	44	-0.387638	-1.14387	0.237643	0.581531	0.51389	6446	tags=36%, list=32%, signal=25%	PLEKHA3/PSEN1/PEX5/PEX2/PEX12/PTPN2/CHMP5/AP1AR/PEX6/LDLR/OPTN/CTSD/ECE1/NSG1/ACHE/PCSK9	receptor recycling	45	-0.386456	-1.28921	0.120253	0.606585	0.565059	2187	tags=20%, list=10%, signal=18%	SORL1/ALS2/TRAT1/USP9X/ECE1/OPTN/CAMLG/LDLR/EPS15	receptor recycling	46	0.22235	0.780852	0.824645	1	1	2987	tags=22%, list=16%, signal=18%	TRAT1/PEX12/PHETA2/RAB29/CTSD/PHETA1/RAMP3/TBC1D16/ARFGEF2/NSF	0.120253	0.824645	p1_0.120253164556962	p0_0.824644549763033
GO:0001885	endothelial cell development	62	-0.552867	-1.75601	0.00148259	0.0375337	0.0331679	4244	tags=37%, list=21%, signal=29%	GSTM3/PLOD3/HPSE/F2RL1/FASN/FOXP3/COL18A1/TJP3/STC1/PECAM1/TNF/PDE2A/HEG1/PDE4D/PROC/PPP1R16B/VEGFA/F11R/CLDN1/SOX18/ICAM1/CDH5/IL1B	endothelial cell development	63	0.350154	1.22423	0.133221	0.628143	0.585141	2649	tags=17%, list=13%, signal=15%	MYADM/PECAM1/ROBO4/MYD88/MSN/TJP2/F2RL1/CDH5/CLDN5/CLIC4/RAP1B	endothelial cell development	60	-0.503533	-1.40881	0.0970874	1	1	727	tags=37%, list=4%, signal=35%	ROCK2/VEGFA/COL27A1/S1PR3/MYD88/RAP1A/RAPGEF3/RAPGEF1/ROBO4/CLDN3/TNMD/ICAM1/PDE4D/MARVELD2/PLCB1/S1PR2/PDE2A/TJP2/CDH5/CLDN5/PTPRS/GPX1	0.00148259	0.133221	p3_0.00148258923769936	p1_0.133220910623946
GO:0001886	endothelial cell morphogenesis	9	-0.452947	-0.962015	0.538	0.797079	0.704366	4159	tags=44%, list=21%, signal=35%	PLOD3/COL18A1/STC1/HEG1	endothelial cell morphogenesis	10	0.291432	0.664406	0.89414	0.976231	0.909399	4062	tags=20%, list=19%, signal=16%	CLIC4/ARHGEF26	endothelial cell morphogenesis	9	0.435262	1.008	0.405172	1	1	1847	tags=22%, list=10%, signal=20%	COL18A1/MET	0.405172	0.89414	p0_0.405172413793103	p1_0.89413988657845
GO:0001889	liver development	131	-0.346873	-1.22381	0.107584	0.417534	0.368968	2443	tags=21%, list=12%, signal=18%	XBP1/CDKN2B/WNT4/IGF2R/UGT1A7/CEBPG/MDK/FGL1/TNF/UGT1A8/TNFAIP3/GATA6/PCK2/HES1/OTC/ONECUT1/SLC7A5/SULF2/CYP1A1/SOD2/PCSK9/UPB1/VTN/CLDN1/HPN/CEACAM1/IL6	liver development	138	-0.230464	-0.925902	0.613953	0.916355	0.853623	3697	tags=24%, list=18%, signal=20%	IL6/E2F7/MET/IGF2R/PHF2/MED1/PCK2/NODAL/ASS1/CITED2/FOXH1/WNT1/MDK/ELK1/NAGLU/RGN/UPB1/PROX1/ALDH1A2/CEBPB/EGFR/CEACAM1/OTC/LIMS2/SLC7A5/CEBPG/ERRFI1/SRSF1/CADM1/PTN/CLDN1/SOD2/ARID5B	liver development	119	0.216237	0.918549	0.663636	1	1	2507	tags=18%, list=14%, signal=16%	PTN/MDK/TNFAIP3/RPS6KA1/FRZB/MESP1/RPGRIP1L/EZH2/CITED2/FGF1/PTPN3/TYMS/CAD/SULF2/DNAAF1/MET/CDKN2B/PCK2/RHBDD3/CEACAM1/SOX9/ITGA2	0.107584	0.663636	p3_0.107583774250441	p0_0.663636363636364
GO:0001890	placenta development	139	-0.270513	-0.963453	0.548718	0.80539	0.711711	2550	tags=17%, list=13%, signal=15%	STC1/ANG/SNAI1/STOX2/CSF2/EOMES/SPINT2/STC2/ASCL2/HES1/PLG/KRT8/SPINT1/PLAC1/ITGB8/MDFI/PCDH12/DLX3/LIF/HEY1/HAND1/HEY2/PTGS2/PDGFB	placenta development	148	-0.242076	-0.984012	0.511628	0.877645	0.817563	3298	tags=21%, list=16%, signal=18%	TCF23/CDX4/CUL7/ZFP36L1/MED1/SOD1/MME/NODAL/HTRA1/HSD17B2/CITED2/KRT8/HS6ST1/EPAS1/FZD5/CEBPB/GJB5/EGFR/STC2/SPINT2/LEF1/CDKN1B/BMP7/PTN/STOX2/NCOA1/BMPR2/EGLN1/ITGB8/CDKN1C/ADM	placenta development	125	-0.234241	-0.711877	0.896781	1	1	4211	tags=26%, list=23%, signal=20%	TAF10/CCNF/TFEB/RBM15/EGFR/FBXW8/SPINT1/FGFR2/ADM/IL10/RSPO3/STOX2/VDR/ADA/GHRL/CITED1/PLK4/WNT7B/ETV2/PTGS2/SOCS3/PCDH12/FOSL1/LIF/KRT19/FZD5/WNT2/VASH2/BMP5/GATA2/MME/IGF2	0.511628	0.896781	p1_0.511627906976744	p0_0.896781354051054
GO:0001892	embryonic placenta development	82	-0.299301	-0.983899	0.491979	0.773753	0.683753	2104	tags=28%, list=10%, signal=25%	PKD1/TFEB/RSPO3/EGLN1/EPAS1/CEBPB/GRHL2/SNAI1/CSF2/EOMES/SPINT2/ASCL2/HES1/PLG/KRT8/SPINT1/MDFI/PCDH12/LIF/HEY1/HAND1/HEY2/PDGFB	embryonic placenta development	87	-0.278461	-1.03344	0.394299	0.821108	0.764896	3640	tags=24%, list=17%, signal=20%	E2F7/RBPJ/CDX4/ZFP36L1/MED1/NODAL/CITED2/KRT8/HS6ST1/EPAS1/FZD5/CEBPB/GJB5/EGFR/SPINT2/LEF1/BMP7/NCOA1/EGLN1/CDKN1C/ADM	embryonic placenta development	75	-0.356001	-1.02949	0.405627	1	1	4211	tags=29%, list=23%, signal=23%	TAF10/TFEB/EGFR/FBXW8/SPINT1/FGFR2/ADM/IL10/RSPO3/CITED1/PLK4/WNT7B/SOCS3/PCDH12/LIF/KRT19/FZD5/WNT2/VASH2/BMP5/GATA2/IGF2	0.394299	0.491979	p1_0.394299287410926	p3_0.491978609625668
GO:0001893	maternal placenta development	32	-0.262498	-0.740765	0.880074	0.965118	0.852859	2550	tags=16%, list=13%, signal=14%	STC1/STOX2/STC2/LIF/PTGS2	maternal placenta development	35	0.279825	0.861578	0.648995	0.92237	0.859226	4966	tags=34%, list=24%, signal=26%	GJB2/PARP2/SPP1/EPOR/GHSR/NDP/DEDD/DCAF13/PARP1/PPARD/PRDX3/NR2F2	maternal placenta development	32	0.49945	1.60181	0.0118664	0.596239	0.596239	1326	tags=22%, list=7%, signal=20%	SPP1/NDP/PTN/CYP27B1/PRDM1/CITED2/TPPP3	0.0118664	0.880074	p0_0.0118663781517292	p3_0.880073800738007
GO:0001894	tissue homeostasis	235	-0.341025	-1.28789	0.0449251	0.300415	0.265472	3128	tags=25%, list=15%, signal=21%	CCR2/GATA1/MAK/NXNL1/RPE65/SASH3/SYK/TJP3/USH1G/SLC22A5/COL3A1/CALCA/LAMA2/CRB2/NOX4/WNK3/CSF1/ESAM/PIWIL4/LTBP3/VSIG1/COL2A1/TPP1/GJA1/FOXC1/CCDC154/CYTL1/SLC39A8/PECAM1/IAPP/TF/KLHL10/RDH12/ABCC8/MUC6/SMO/TNFAIP3/DMD/SERPINA3/TLR9/IL20RB/TNFRSF11B/INPP5D/VEGFA/SLC2A1/NFKBIZ/TLR4/CDHR1/CD34/ABCA4/F11R/CLDN1/PROM1/NOD2/CDH5/PTGS2/IL6/CD38	tissue homeostasis	252	-0.220661	-0.959435	0.602906	0.912753	0.850267	2022	tags=12%, list=10%, signal=11%	IQCB1/NAGLU/ALDH1A1/TRAF6/VSTM4/HTR4/FOXC1/VSIG1/EGFR/TRIM32/SPATA7/ERRFI1/CLCN3/CDH3/ABCC8/PLEKHM1/ADAM8/ESRRB/ALPL/SRF/NFKBIZ/CLDN1/ADRB2/COL14A1/CXADR/ABCA4/OCLN/ILDR1/TFRC/PTK2B/SLC2A1	tissue homeostasis	204	0.212565	0.958932	0.588235	1	1	3078	tags=21%, list=17%, signal=18%	CYTL1/SPP1/NDP/COMP/F2R/NT5E/SLC1A1/TNFRSF11B/TNFAIP3/RP1/BCL2/SLC12A2/PIWIL4/TLR4/CCR2/HTR4/SNX10/TF/MAK/ANKH/ERCC6/WHRN/COL3A1/ACP5/NPHP4/LRRK1/BBS10/BBS12/BAX/CORO1A/CDH3/SOX9/SCX/MBP/P2RX7/PTK2B/PPARGC1B/IL7/NCDN/IL10RA/GPR137/UBASH3B/ADAM8	0.0449251	0.602906	p3_0.0449251247920133	p1_0.602905569007264
GO:0001895	retina homeostasis	50	0.252415	0.795979	0.845475	0.952074	0.841333	2789	tags=22%, list=14%, signal=19%	PCDH15/USH2A/RP1L1/CDH23/RP1/ADGRV1/ATP1B2/CDH3/AIPL1/NDP/TULP1	retina homeostasis	53	-0.284692	-0.980047	0.484513	0.863783	0.804649	4069	tags=26%, list=19%, signal=21%	CLN8/AIPL1/NXNL2/MKKS/SOD1/CRB1/IQCB1/VSTM4/SPATA7/CLCN3/CDH3/ESRRB/ABCA4/SLC2A1	retina homeostasis	34	0.341689	1.10579	0.272727	1	1	2329	tags=26%, list=13%, signal=23%	NDP/RP1/MAK/ERCC6/WHRN/NPHP4/BBS10/BBS12/CDH3	0.272727	0.845475	p0_0.272727272727273	p3_0.845474613686534
GO:0001906	cell killing	154	-0.364	-1.31576	0.0439189	0.297124	0.262564	4264	tags=38%, list=21%, signal=30%	SERPINB9/TGFB1/HLA-G/MICA/APOL1/GSDMB/MICB/HLA-A/CX3CR1/LAMP1/HLA-H/NINJ1/F2RL1/TYROBP/KLRK1/CD55/GNLY/RNASE7/SYK/HLA-B/C9/PF4/HLA-C/PVR/F2/ULBP2/CEBPG/CR1/LGALS9/STXBP2/CFH/UNC13D/KLRC1/ULBP1/NCR3/PTPRC/KLRD1/HTN3/CR1L/VAV1/HLA-F/AZU1/IL13/LTF/GBP7/IL18RAP/GBP5/RASGRP1/GZMA/C8A/TREM1/CD1D/C8B/SLAMF7/IL23A/ICAM1/C3/CEACAM1/CXCL6	cell killing	205	0.273435	1.12278	0.189236	0.687393	0.640335	3923	tags=20%, list=19%, signal=17%	CTSC/SERPINB9/STXBP2/MR1/TGFB1/MYD88/CD1A/RIPK3/TUBB/RNF19B/F2RL1/GZMM/ULBP2/NCR3/CD1C/RAB27A/CRTAM/TUBB4B/CFHR2/CD160/TAP2/NOS2/HAMP/IL18RAP/PF4/GBP3/CD226/HRG/DEFB132/GZMA/SLAMF6/PRDX1/CFHR5/IL12A/RAET1E/HAVCR2/KLRF2/HFE/NCR1/IFNG/CORO1A/SH2D1A	cell killing	156	-0.2405	-0.743308	0.87704	1	1	2563	tags=16%, list=14%, signal=14%	KIR2DL4/ARG1/GBP7/IL18/GNLY/CLEC7A/DEFA3/CX3CR1/NCR3/C6/SLAMF7/C7/KIR3DL1/SYK/CD1D/LTF/ELANE/PRF1/GZMB/CTSG/AGER/C3/CCL13/S100A12/PLA2G2A	0.0439189	0.87704	p3_0.0439189189189189	p0_0.877040261153428
GO:0001909	leukocyte mediated cytotoxicity	106	-0.333439	-1.14626	0.205725	0.54631	0.482766	2469	tags=24%, list=12%, signal=21%	HLA-C/PVR/F2/ULBP2/CEBPG/LGALS9/STXBP2/UNC13D/KLRC1/ULBP1/NCR3/PTPRC/KLRD1/VAV1/HLA-F/AZU1/IL18RAP/RASGRP1/TREM1/CD1D/SLAMF7/IL23A/ICAM1/CEACAM1/CXCL6	leukocyte mediated cytotoxicity	128	0.407988	1.58602	0.00116382	0.0540082	0.0503108	3923	tags=25%, list=19%, signal=21%	CTSC/SERPINB9/STXBP2/MR1/TGFB1/MYD88/CD1A/RIPK3/TUBB/RNF19B/F2RL1/GZMM/ULBP2/NCR3/CD1C/RAB27A/CRTAM/TUBB4B/CD160/TAP2/NOS2/IL18RAP/CD226/SLAMF6/PRDX1/IL12A/RAET1E/HAVCR2/KLRF2/HFE/NCR1/CORO1A/SH2D1A	leukocyte mediated cytotoxicity	116	0.307726	1.29118	0.0693142	1	1	3609	tags=36%, list=20%, signal=29%	RAET1E/F2RL1/CD1E/HFE/PTPN6/IL7R/CD226/SLAMF6/LGALS9/ULBP2/CD2/HLA-DRA/TGFB1/KLRB1/FCGR2B/DNASE1L3/FCGR2A/LILRB1/NECTIN2/CRTAM/HLA-DRB1/CORO1A/CEACAM1/SERPINB9/P2RX7/FCGR3A/LAG3/IL23A/FCGR1A/B2M/HLA-C/HPRT1/MICB/KLRC4/HLA-A/HLA-B/GZMM/CRK/HLA-E/PTPRC/PIK3R6/IL23R	0.00116382	0.205725	p1_0.00116381821286704	p3_0.205724508050089
GO:0001910	regulation of leukocyte mediated cytotoxicity	74	-0.340953	-1.10843	0.268893	0.613362	0.542018	4264	tags=42%, list=21%, signal=33%	SERPINB9/TGFB1/HLA-G/MICA/MICB/HLA-A/CX3CR1/LAMP1/HLA-H/F2RL1/TYROBP/KLRK1/HLA-B/HLA-C/PVR/ULBP2/LGALS9/KLRC1/ULBP1/NCR3/PTPRC/KLRD1/VAV1/HLA-F/IL18RAP/RASGRP1/CD1D/IL23A/ICAM1/CEACAM1/CXCL6	regulation of leukocyte mediated cytotoxicity	87	0.364657	1.34487	0.0464716	0.419945	0.391197	3923	tags=25%, list=19%, signal=20%	SERPINB9/MR1/TGFB1/CD1A/RIPK3/F2RL1/ULBP2/NCR3/CD1C/CRTAM/CD160/TAP2/NOS2/IL18RAP/CD226/SLAMF6/IL12A/RAET1E/HAVCR2/HFE/NCR1/SH2D1A	regulation of leukocyte mediated cytotoxicity	76	0.426701	1.67053	0.00383008	0.355166	0.355166	3609	tags=45%, list=20%, signal=36%	RAET1E/F2RL1/CD1E/HFE/IL7R/CD226/SLAMF6/LGALS9/ULBP2/HLA-DRA/TGFB1/KLRB1/FCGR2B/DNASE1L3/LILRB1/NECTIN2/CRTAM/HLA-DRB1/CEACAM1/SERPINB9/P2RX7/LAG3/IL23A/B2M/HLA-C/MICB/KLRC4/HLA-A/HLA-B/CRK/HLA-E/PTPRC/PIK3R6/IL23R	0.00383008	0.268893	p0_0.00383007827119153	p3_0.268892794376098
GO:0001911	negative regulation of leukocyte mediated cytotoxicity	23	-0.512095	-1.36193	0.0969582	0.39833	0.351998	4264	tags=57%, list=21%, signal=45%	SERPINB9/TGFB1/HLA-G/MICA/HLA-A/CX3CR1/HLA-B/LGALS9/KLRC1/PTPRC/KLRD1/HLA-F/CEACAM1	negative regulation of leukocyte mediated cytotoxicity	25	0.303801	0.863408	0.681239	0.93214	0.868327	493	tags=8%, list=2%, signal=8%	SERPINB9/TGFB1	negative regulation of leukocyte mediated cytotoxicity	24	0.458106	1.38449	0.0971223	1	1	3564	tags=50%, list=20%, signal=40%	IL7R/LGALS9/TGFB1/FCGR2B/LILRB1/CEACAM1/SERPINB9/HLA-A/HLA-B/CRK/HLA-E/PTPRC	0.0969582	0.681239	p3_0.096958174904943	p1_0.681238615664845
GO:0001912	positive regulation of leukocyte mediated cytotoxicity	52	-0.321514	-0.978686	0.482505	0.766412	0.677266	4166	tags=46%, list=21%, signal=37%	HLA-G/MICA/MICB/HLA-A/LAMP1/HLA-H/F2RL1/TYROBP/KLRK1/HLA-B/HLA-C/PVR/ULBP2/KLRC1/ULBP1/NCR3/PTPRC/KLRD1/VAV1/HLA-F/IL18RAP/RASGRP1/CD1D/IL23A	positive regulation of leukocyte mediated cytotoxicity	60	0.406416	1.40033	0.0429553	0.393938	0.36697	3923	tags=28%, list=19%, signal=23%	MR1/CD1A/F2RL1/ULBP2/NCR3/CD1C/CRTAM/CD160/TAP2/NOS2/IL18RAP/CD226/SLAMF6/IL12A/RAET1E/HFE/SH2D1A	positive regulation of leukocyte mediated cytotoxicity	53	0.458636	1.69099	0.0106218	0.585771	0.585771	4119	tags=49%, list=23%, signal=38%	RAET1E/F2RL1/CD1E/HFE/CD226/SLAMF6/ULBP2/HLA-DRA/NECTIN2/CRTAM/HLA-DRB1/P2RX7/LAG3/IL23A/B2M/HLA-C/MICB/KLRC4/HLA-A/HLA-B/HLA-E/PTPRC/IL23R/CD1C/TAP2/SH2D1A	0.0106218	0.482505	p0_0.0106218353531607	p3_0.482504604051565
GO:0001913	T cell mediated cytotoxicity	47	0.304914	0.959743	0.512876	0.785931	0.694515	1858	tags=19%, list=9%, signal=17%	HLA-DRA/RAET1E/HLA-DRB1/RIPK3/IL12B/IL7R/P2RX7/EMP2/SLC22A13	T cell mediated cytotoxicity	51	0.426988	1.41867	0.0576577	0.474907	0.442396	1985	tags=18%, list=9%, signal=16%	CTSC/MR1/CD1A/RIPK3/GZMM/ULBP2/CD1C/RAB27A/TAP2	T cell mediated cytotoxicity	48	0.455794	1.60294	0.0071659	0.496885	0.496885	4081	tags=52%, list=23%, signal=40%	RAET1E/CD1E/HFE/IL7R/ULBP2/HLA-DRA/FCGR2B/LILRB1/NECTIN2/HLA-DRB1/CEACAM1/P2RX7/IL23A/B2M/HLA-C/HPRT1/MICB/HLA-A/HLA-B/GZMM/HLA-E/PTPRC/IL23R/CD1C/TAP2	0.0071659	0.512876	p0_0.00716589890760973	p3_0.512875536480687
GO:0001914	regulation of T cell mediated cytotoxicity	40	0.326453	0.990029	0.478261	0.764292	0.675393	930	tags=18%, list=5%, signal=17%	HLA-DRA/RAET1E/HLA-DRB1/RIPK3/IL12B/IL7R/P2RX7	regulation of T cell mediated cytotoxicity	43	0.297147	0.952431	0.502783	0.872468	0.81274	3682	tags=21%, list=18%, signal=17%	MR1/CD1A/RIPK3/ULBP2/CD1C/TAP2/IL12A/RAET1E/HFE	regulation of T cell mediated cytotoxicity	40	0.506733	1.72218	0.00491108	0.407899	0.407899	4081	tags=57%, list=23%, signal=45%	RAET1E/CD1E/HFE/IL7R/ULBP2/HLA-DRA/FCGR2B/LILRB1/NECTIN2/HLA-DRB1/CEACAM1/P2RX7/IL23A/B2M/HLA-C/MICB/HLA-A/HLA-B/HLA-E/PTPRC/IL23R/CD1C/TAP2	0.00491108	0.502783	p0_0.00491107776280949	p1_0.50278293135436
GO:0001915	negative regulation of T cell mediated cytotoxicity	9	-0.664331	-1.41097	0.106	0.41526	0.366959	1573	tags=44%, list=8%, signal=41%	KLRC1/PTPRC/KLRD1/CEACAM1	negative regulation of T cell mediated cytotoxicity	10	-0.575591	-1.31965	0.131078	0.628143	0.585141	2076	tags=40%, list=10%, signal=36%	HLA-G/PPP3CB/CEACAM1/FCGR2B	negative regulation of T cell mediated cytotoxicity	10	0.613406	1.47641	0.0804598	1	1	3564	tags=50%, list=20%, signal=40%	IL7R/FCGR2B/LILRB1/CEACAM1/PTPRC	0.0804598	0.131078	p0_0.0804597701149425	p1_0.13107822410148
GO:0001916	positive regulation of T cell mediated cytotoxicity	31	0.329207	0.945261	0.561822	0.812701	0.718171	930	tags=16%, list=5%, signal=15%	HLA-DRA/RAET1E/HLA-DRB1/IL12B/P2RX7	positive regulation of T cell mediated cytotoxicity	33	0.355907	1.08281	0.333333	0.797438	0.742847	3682	tags=24%, list=18%, signal=20%	MR1/CD1A/ULBP2/CD1C/TAP2/IL12A/RAET1E/HFE	positive regulation of T cell mediated cytotoxicity	30	0.563566	1.75701	0.00167317	0.219823	0.219823	4081	tags=63%, list=23%, signal=49%	RAET1E/CD1E/HFE/ULBP2/HLA-DRA/NECTIN2/HLA-DRB1/P2RX7/IL23A/B2M/HLA-C/MICB/HLA-A/HLA-B/HLA-E/PTPRC/IL23R/CD1C/TAP2	0.00167317	0.561822	p0_0.00167316652448154	p3_0.561822125813449
GO:0001919	regulation of receptor recycling	24	-0.471604	-1.26133	0.174081	0.509369	0.450121	4993	tags=33%, list=25%, signal=25%	CHMP5/AP1AR/LDLR/OPTN/ECE1/NSG1/ACHE/PCSK9	regulation of receptor recycling	25	-0.451825	-1.31046	0.116998	0.599787	0.558727	1961	tags=20%, list=9%, signal=18%	TRAT1/ECE1/OPTN/LDLR/EPS15	regulation of receptor recycling	24	-0.364876	-0.894595	0.573204	1	1	2979	tags=21%, list=16%, signal=17%	ACHE/SNCA/AP1AR/BVES/LDLR	0.116998	0.573204	p1_0.116997792494481	p0_0.573204419889503
GO:0001921	positive regulation of receptor recycling	14	-0.306225	-0.715671	0.838835	0.94953	0.839085	2264	tags=43%, list=11%, signal=38%	ARAP1/EPS15/RAB29/PSEN1/ECE1/NSG1	positive regulation of receptor recycling	14	-0.408611	-1.03588	0.389583	0.819134	0.763057	1689	tags=21%, list=8%, signal=20%	NSG1/ECE1/EPS15	positive regulation of receptor recycling	14	-0.286053	-0.62414	0.901786	1	1	2304	tags=14%, list=13%, signal=12%	SNCA/BVES	0.389583	0.901786	p1_0.389583333333333	p0_0.901785714285714
GO:0001933	negative regulation of protein phosphorylation	261	-0.294341	-1.12759	0.157191	0.488652	0.431814	2064	tags=14%, list=10%, signal=13%	SPRY1/DMTN/SLIT2/HHEX/PIP5KL1/CADM4/CDKN1A/PTK6/HEG1/NPPA/PRNP/PDE4D/MAS1/LYN/SMO/ADARB1/DMD/PTPRO/DEPTOR/NLRP12/PID1/BDKRB1/PPM1E/PTPRC/CAV3/ZC3H12A/MYOCD/PTPRB/IGFBP3/SPINK1/SLC8A3/MLXIPL/KIRREL2/TRIB3/CEACAM1/NTRK3/IL1B	negative regulation of protein phosphorylation	265	0.230491	0.976775	0.527183	0.885176	0.824578	5143	tags=28%, list=24%, signal=22%	RASSF2/MYADM/LRRK1/PTPN22/SIRT2/CALM1/HGF/DUSP16/PRNP/THY1/TGFB1/VPS25/BMP2/DRD2/BAK1/CIB1/DNAJC3/PLK1/DUSP6/PPP2R5D/DKK1/SPRED2/RASIP1/PWP1/CHMP6/DUSP10/HSPB1/EPHA1/XDH/YWHAG/SAMSN1/PBK/ATG14/PTPRT/MEN1/CADM4/PAX6/NPM1/HYAL2/RB1/KIRREL2/BDKRB2/SOCS3/IGFBP3/IPO7/INCA1/TARDBP/PPP2CA/SIRPA/PTPRQ/IFNG/PYDC1/PKIB/DVL1/AKT1S1/DNAJA1/BDKRB1/EIF4G1/CDKN2A/TERF2IP/MAPK8IP1/PTPRB/PDE4D/INSM1/SPRY4/CDK5RAP…	negative regulation of protein phosphorylation	251	0.196282	0.919429	0.857143	1	1	3358	tags=20%, list=19%, signal=16%	CDKN2A/CD109/SPRY4/AGT/PTPN6/CADM4/PPARG/CD300A/RGS14/DUSP10/PKIB/THY1/TGFB1/IFNG/PRKCZ/SOCS1/PRKAR1B/PTPN13/TRIB2/RGS2/DEPTOR/TRIB3/APOE/SERPINB3/PTPRO/LRRK1/PTPN22/PTEN/CNKSR3/MEN1/BAX/NF2/CEACAM1/SAMSN1/LILRB4/TSC2/SMAD7/BAK1/IRAK3/IGFBP3/RACK1/UBASH3B/ENPP1/LRP5/SOCS5/OCLN/PIBF1/SPRED2/INPP5J	0.157191	0.857143	p3_0.157190635451505	p0_0.857142857142857
GO:0001935	endothelial cell proliferation	144	-0.447787	-1.59711	0.00112825	0.0309749	0.027372	2960	tags=40%, list=15%, signal=34%	MMP14/TEK/DLG1/FGF7/POLD4/MYDGF/CXCL12/BMP4/PLXNB3/APLNR/MIR492/MIR503/SPARC/BMPER/MMRN2/ANG/PIK3CD/PTPRM/STAT1/ADAM17/THBS1/FLT1/SCARB1/FLT4/TGFBR1/COL8A1/MDK/FGF2/LOXL2/TNF/SEMA5A/ERN1/ATOH8/HSPG2/NR4A1/CCL26/SCG2/SULF1/CDH13/PGF/APLN/PPP1R16B/VEGFA/KDR/PRL/NRARP/CD34/EGFL7/TIE1/FUT1/APOA1/COL4A3/VIP/BMP6/PDGFB/CCL2/CCL11	endothelial cell proliferation	150	0.212329	0.839114	0.850435	0.9676	0.90136	3377	tags=16%, list=16%, signal=13%	CCL26/EGR3/ITGB3/ACVRL1/TIE1/SP1/KDR/COL4A3/PGF/TGFBR1/PDCL3/APOH/ZEB2/CCL2/XDH/GHSR/ARNT/SCG2/HMGB1/FGFBP1/PRKD2/ANG/STAT3/IL12A	endothelial cell proliferation	139	0.228886	0.989993	0.452632	1	1	2064	tags=19%, list=11%, signal=17%	SULF1/JCAD/MDK/LOXL2/PGF/EPHA2/PPARG/TEK/HTR2B/SCG2/ALOX5/ITGA4/ECM1/SCARB1/PRKX/SEMA5A/BMP6/CXCL12/PRKD2/APOE/MMRN2/POLD4/COL8A1/CCL26/FLT1/NGFR	0.00112825	0.850435	p3_0.00112825293861006	p1_0.850434782608696
GO:0001936	regulation of endothelial cell proliferation	124	-0.44295	-1.55744	0.00349815	0.068632	0.060649	2522	tags=30%, list=12%, signal=26%	MMRN2/ANG/PIK3CD/PTPRM/STAT1/ADAM17/THBS1/FLT1/FLT4/TGFBR1/MDK/FGF2/TNF/SEMA5A/ATOH8/HSPG2/NR4A1/CCL26/SCG2/SULF1/CDH13/PGF/APLN/PPP1R16B/VEGFA/KDR/PRL/NRARP/EGFL7/TIE1/FUT1/COL4A3/VIP/BMP6/PDGFB/CCL2/CCL11	regulation of endothelial cell proliferation	129	0.253214	0.986563	0.5	0.871751	0.812073	3736	tags=19%, list=18%, signal=16%	CCL26/EGR3/ITGB3/ACVRL1/TIE1/SP1/KDR/COL4A3/PGF/TGFBR1/PDCL3/APOH/CCL2/XDH/GHSR/ARNT/SCG2/HMGB1/FGFBP1/PRKD2/ANG/STAT3/IL12A/SLC39A9/MYDGF	regulation of endothelial cell proliferation	119	-0.261905	-0.791459	0.792601	1	1	3491	tags=23%, list=19%, signal=18%	TNMD/FUT2/IL10/AGTR1/SLC39A9/THBS1/GHRL/FGFBP1/VIP/LRG1/PROK1/TIE1/KDR/NR4A1/FGF7/FLT4/PROX1/ITGB3/WNT5A/VASH2/APOH/CCL2/THBS4/GATA2/FGF10/IGF2/VEGFD	0.00349815	0.792601	p3_0.00349815022807094	p0_0.792600896860987
GO:0001937	negative regulation of endothelial cell proliferation	37	-0.416385	-1.2087	0.18232	0.51771	0.457492	2960	tags=43%, list=15%, signal=37%	MIR492/MIR503/SPARC/MMRN2/PTPRM/STAT1/THBS1/FLT1/TGFBR1/TNF/ATOH8/SCG2/SULF1/PRL/COL4A3/CCL2	negative regulation of endothelial cell proliferation	38	0.316434	0.995531	0.469835	0.854213	0.795735	5647	tags=36%, list=27%, signal=26%	ACVRL1/COL4A3/TGFBR1/APOH/CCL2/XDH/SCG2/IL12A/SPARC/NR2F2/AIMP1/GDF2/APOE/RGCC	negative regulation of endothelial cell proliferation	35	0.329925	1.07009	0.340807	1	1	2064	tags=23%, list=11%, signal=20%	SULF1/PPARG/SCG2/ALOX5/APOE/MMRN2/FLT1/NGFR	0.18232	0.469835	p3_0.18232044198895	p1_0.469835466179159
GO:0001938	positive regulation of endothelial cell proliferation	88	-0.441427	-1.47141	0.0201996	0.188838	0.166873	3899	tags=38%, list=19%, signal=30%	TEK/FGF7/POLD4/MYDGF/CXCL12/BMP4/PLXNB3/APLNR/MIR503/ANG/PIK3CD/ADAM17/FLT4/TGFBR1/MDK/FGF2/SEMA5A/HSPG2/NR4A1/CCL26/SCG2/CDH13/PGF/APLN/PPP1R16B/VEGFA/KDR/NRARP/EGFL7/VIP/BMP6/PDGFB/CCL11	positive regulation of endothelial cell proliferation	91	0.285582	1.06168	0.348048	0.807879	0.752572	3201	tags=18%, list=15%, signal=16%	CCL26/EGR3/ITGB3/ACVRL1/SP1/KDR/PGF/TGFBR1/PDCL3/GHSR/ARNT/SCG2/HMGB1/FGFBP1/PRKD2/ANG/STAT3	positive regulation of endothelial cell proliferation	85	-0.31524	-0.9246	0.572759	1	1	2866	tags=24%, list=16%, signal=20%	IL10/AGTR1/GHRL/FGFBP1/VIP/LRG1/PROK1/KDR/NR4A1/FGF7/FLT4/PROX1/ITGB3/WNT5A/VASH2/THBS4/GATA2/FGF10/IGF2/VEGFD	0.0201996	0.572759	p3_0.0201996176510229	p0_0.572759022118743
GO:0001941	postsynaptic membrane organization	38	0.350868	1.04903	0.37961	0.700823	0.619306	2342	tags=16%, list=12%, signal=14%	CHRDL1/RELN/LRRC4/NLGN3/NLGN4X/FARP1	postsynaptic membrane organization	40	-0.298739	-0.966549	0.496732	0.869673	0.810136	4061	tags=30%, list=19%, signal=24%	CHRNB1/ZMYND8/FNTA/SLC7A11/LHFPL4/SHISA7/NRXN2/DLG4/CRIPT/ZDHHC2/GDNF/SSH1	postsynaptic membrane organization	33	0.329494	1.05518	0.340249	1	1	2279	tags=21%, list=13%, signal=19%	CDH2/NLGN4X/FARP1/APOE/DNAJA3/MESD/LRRC4	0.340249	0.496732	p0_0.340248962655602	p1_0.496732026143791
GO:0001942	hair follicle development	84	0.329525	1.13891	0.217295	0.56117	0.495897	2572	tags=23%, list=13%, signal=20%	APCDD1/FOXQ1/GAL/FGF10/FOXE1/ALX4/FGFR2/TNFRSF19/FERMT1/NGFR/RBPJ/LHX2/WNT5A/SOX9/HOXC13/IGFBP5/CDH3/LDB2/CD109	hair follicle development	94	0.279759	1.03288	0.407733	0.832785	0.775774	3958	tags=23%, list=19%, signal=19%	PIAS4/NOTCH1/ZMPSTE24/PLA2G10/SOSTDC1/DKK4/NSDHL/EDA/TP63/DKK1/TRADD/ALX4/ERCC2/LGR5/SOX9/KRT27/SOS1/WNT10B/SNAI1/KRT71/NSUN2/KRT28	hair follicle development	74	0.214842	0.832324	0.807947	1	1	2630	tags=18%, list=15%, signal=15%	KRT17/SOX18/CD109/DLX3/BCL2/WNT10A/SNAI1/FZD6/NGFR/CDH3/SOX9/GORAB/FUZ	0.217295	0.807947	p3_0.217294900221729	p0_0.80794701986755
GO:0001945	lymph vessel development	30	-0.620319	-1.73194	0.0101882	0.128873	0.113883	3194	tags=50%, list=16%, signal=42%	PKD1/EFNB2/SYK/TMEM204/FLT4/FOXC1/FGF2/HEG1/CLEC14A/SVEP1/TBX1/VEGFA/KDR/TIE1/SOX18	lymph vessel development	30	-0.341471	-1.04279	0.383117	0.814536	0.758774	2076	tags=20%, list=10%, signal=18%	PPP3CB/PROX1/FOXC1/EFNB2/BMPR2/ACVR2B	lymph vessel development	30	-0.473205	-1.20404	0.245383	1	1	1919	tags=30%, list=11%, signal=27%	TIE1/KDR/TBX1/FLT4/SYK/PROX1/PDPN/SVEP1/CCBE1	0.0101882	0.383117	p3_0.0101881986350741	p1_0.383116883116883
GO:0001946	lymphangiogenesis	17	-0.568878	-1.40121	0.0900383	0.384504	0.33978	2184	tags=29%, list=11%, signal=26%	FLT4/FOXC1/CLEC14A/TIE1/SOX18	lymphangiogenesis	17	-0.394054	-1.05302	0.4	0.826792	0.770191	2076	tags=29%, list=10%, signal=27%	PPP3CB/PROX1/FOXC1/BMPR2/ACVR2B	lymphangiogenesis	17	-0.419364	-0.961769	0.515625	1	1	1919	tags=29%, list=11%, signal=26%	TIE1/FLT4/PROX1/PDPN/CCBE1	0.0900383	0.515625	p3_0.0900383141762452	p0_0.515625
GO:0001947	heart looping	61	-0.47007	-1.48769	0.0351077	0.257795	0.227809	545	tags=13%, list=3%, signal=13%	TBX20/GATA4/SOX17/HAND2/SOX18/HAND1/VANGL2/NKX2-5	heart looping	66	-0.331276	-1.16391	0.201405	0.696818	0.649115	2770	tags=38%, list=13%, signal=33%	TGFBR2/PKD2/APLNR/MESP1/TBX6/HAND2/OVOL2/DVL2/FOLR1/MKKS/IFT52/TBX20/MIB1/WNT5A/NODAL/CITED2/FOXH1/IFT57/IFT172/TBX2/SRF/SETDB2/MEF2C/ASB2/BBS5	heart looping	50	0.241358	0.869043	0.696078	1	1	3663	tags=26%, list=20%, signal=21%	SOX18/ENG/MESP1/C2CD3/CITED2/IFT172/DNAAF1/DVL2/TBX6/NPHP3/RNF207/SMAD3/APLNR	0.0351077	0.696078	p3_0.0351076942931731	p0_0.696078431372549
GO:0001952	regulation of cell-matrix adhesion	116	-0.292386	-1.01718	0.407143	0.722059	0.638073	3936	tags=28%, list=19%, signal=22%	MMP14/RRAS/TEK/ONECUT2/PTPRJ/ACER2/PRKCZ/PHLDB2/BST1/CASK/PTK2B/SLC9A1/CCL25/CSF1/WNT4/THBS1/DMTN/COL16A1/LIMCH1/SERPINE1/JUP/CCL21/ONECUT1/CDH13/CAMSAP3/CCR7/DDR1/JAG1/VEGFA/KDR/FUT1/CX3CL1	regulation of cell-matrix adhesion	119	-0.255585	-1.0043	0.4375	0.843237	0.78551	3758	tags=21%, list=18%, signal=17%	TSC1/EFEMP2/CDH13/DDR1/SKAP1/GSK3B/BCL6/PLEKHA2/CX3CL1/PKHD1/DISC1/CLASP1/DLC1/ADAM15/RRAS/JUP/PTPRA/DMTN/GPM6B/PIK3CB/HOXA7/CD36/PTEN/CAMSAP3/PTK2B	regulation of cell-matrix adhesion	108	0.243518	1.0107	0.389381	1	1	1379	tags=12%, list=8%, signal=11%	CDKN2A/POSTN/CCR7/EPHA3/DISC1/DDR1/TEK/BCL2/THY1/CD3E/BST1/PRKCZ/RIN2	0.389381	0.4375	p0_0.389380530973451	p1_0.4375
GO:0001953	negative regulation of cell-matrix adhesion	36	0.342347	1.01085	0.441304	0.742765	0.65637	4260	tags=36%, list=21%, signal=29%	MMP12/HOXA7/APOD/SEMA3E/ARHGAP6/MYOC/MAP4K4/MIR29C/MIR939/ACVRL1/CORO1C/RASA1/ITGB1BP1	negative regulation of cell-matrix adhesion	35	-0.278964	-0.874503	0.696703	0.936099	0.872015	1926	tags=14%, list=9%, signal=13%	DLC1/ADAM15/DMTN/HOXA7/PTEN	negative regulation of cell-matrix adhesion	32	0.309539	0.992735	0.465306	1	1	43	tags=6%, list=0%, signal=6%	CDKN2A/POSTN	0.441304	0.696703	p3_0.441304347826087	p1_0.696703296703297
GO:0001954	positive regulation of cell-matrix adhesion	53	-0.373235	-1.13839	0.245387	0.588433	0.519989	3916	tags=32%, list=19%, signal=26%	RRAS/TEK/PTPRJ/PRKCZ/PTK2B/CCL25/CSF1/WNT4/COL16A1/JUP/CCL21/CDH13/CCR7/VEGFA/KDR/FUT1/CX3CL1	positive regulation of cell-matrix adhesion	55	0.239903	0.813545	0.812281	0.966142	0.900001	3610	tags=21%, list=17%, signal=18%	THY1/ITGB3/CIB1/KDR/SDC4/CCL21/EPHA1/CD3E/HRG/CCL28/ROCK1/DISC1	positive regulation of cell-matrix adhesion	52	-0.305012	-0.838994	0.67	1	1	1775	tags=12%, list=10%, signal=10%	KDR/ITGB3/MYOC/CCL21/CEACAM6/SFRP1	0.245387	0.812281	p3_0.245387453874539	p1_0.812280701754386
GO:0001956	positive regulation of neurotransmitter secretion	17	-0.570737	-1.40579	0.0900383	0.384504	0.33978	640	tags=24%, list=3%, signal=23%	BAIAP3/GPR158/SLC18A3/ADORA2A	positive regulation of neurotransmitter secretion	17	0.273442	0.705288	0.878558	0.971245	0.904755	5697	tags=41%, list=27%, signal=30%	GPR158/BGLAP/STX1B/NLGN1/SLC4A8/RAB3GAP1/STXBP1	positive regulation of neurotransmitter secretion	14	-0.440502	-0.961132	0.516369	1	1	3884	tags=43%, list=21%, signal=34%	DTNBP1/BAIAP3/SNCA/GPER1/NLGN1/SYT1	0.0900383	0.878558	p3_0.0900383141762452	p1_0.878557874762808
GO:0001958	endochondral ossification	30	0.351288	1.00281	0.464516	0.757094	0.669033	1045	tags=20%, list=5%, signal=19%	MMP13/DLX5/TMEM119/FGF18/ALPL/RUNX2	endochondral ossification	30	-0.356422	-1.08845	0.335498	0.797548	0.742949	4572	tags=33%, list=22%, signal=26%	DLX5/NAB1/SCX/IFT80/CBS/FOXC1/BMP6/SMPD3/ALPL/MEF2C	endochondral ossification	25	0.376304	1.13778	0.270073	1	1	3530	tags=40%, list=19%, signal=32%	TEK/COL13A1/SMPD3/BMP6/IFT80/RUNX2/SCX/BMP4/NAB1/EXT1	0.270073	0.464516	p0_0.27007299270073	p3_0.464516129032258
GO:0001959	regulation of cytokine-mediated signaling pathway	144	-0.366053	-1.30559	0.0550775	0.315911	0.279165	5176	tags=33%, list=26%, signal=25%	SPPL2B/NR1H2/CASP4/OAS3/HSPA1A/AGPAT2/GSTP1/GAS6/RNF113A/ROBO1/IRAK2/NKIRAS2/SPHK1/RNF185/ULK1/TSLP/TXK/STAT2/IL1RN/HSPA1B/F2RL1/MIB2/NR1H4/RIPK2/PARP14/SYK/TREM2/PXDN/ZBP1/CSF1/ADAM17/SLIT2/BIRC7/OAS1/TNFAIP3/IRF7/LAPTM5/PTPRC/ISG15/PADI2/SLIT3/CCL5/CXCR4/CCDC3/APOA1/EDN1/IL36RN/IL6	regulation of cytokine-mediated signaling pathway	150	-0.249712	-1.01737	0.419204	0.83603	0.778797	2938	tags=21%, list=14%, signal=18%	NR1H4/NLRC5/MED1/HSPA1B/TRIM56/PARP14/SLIT3/WNT5A/AXL/CASP4/LSM14A/OAS1/TSLP/CARD16/IKBKB/OAS3/PXDN/ULK1/NLRP6/TRIM32/IRAK2/CARD8/OTOP1/PARP9/MIB2/GAS6/CD300LF/CD24/EDN1/PELI3/ZBP1/SAMHD1	regulation of cytokine-mediated signaling pathway	140	0.346489	1.50264	0.00543469	0.423948	0.423948	3564	tags=28%, list=20%, signal=23%	CXCR4/TREM2/F2RL1/GFI1/NLRC5/IKBKE/PTPN6/PPARG/OAS3/CCL5/TNFAIP3/HSPA1B/GAS6/ECM1/OAS1/BIRC7/IRF7/PELI3/CD74/IL1R1/SLIT3/LAPTM5/RFFL/SPATA2/SPHK1/SMIM30/NAIP/IL7/TRAF2/IRAK3/ZBP1/STAT2/ROBO1/CASP1/EDN1/CSF1/SH2B3/CARD16/PTPRC	0.00543469	0.419204	p0_0.0054346878868173	p1_0.4192037470726
GO:0001960	negative regulation of cytokine-mediated signaling pathway	70	-0.430222	-1.37714	0.0472362	0.307523	0.271754	1981	tags=33%, list=10%, signal=30%	GSTP1/GAS6/RNF113A/ROBO1/STAT2/IL1RN/F2RL1/NR1H4/PARP14/TREM2/PXDN/SLIT2/BIRC7/OAS1/PTPRC/ISG15/PADI2/SLIT3/CCL5/CCDC3/APOA1/IL36RN/IL6	negative regulation of cytokine-mediated signaling pathway	73	-0.203428	-0.731434	0.946262	0.989383	0.921651	2938	tags=18%, list=14%, signal=15%	NR1H4/NLRC5/PARP14/SLIT3/OAS1/CARD16/OAS3/PXDN/CARD8/OTOP1/GAS6/PELI3/SAMHD1	negative regulation of cytokine-mediated signaling pathway	65	0.394107	1.49259	0.0171015	0.714472	0.714472	3564	tags=32%, list=20%, signal=26%	TREM2/F2RL1/NLRC5/PPARG/OAS3/CCL5/GAS6/ECM1/OAS1/BIRC7/PELI3/SLIT3/RFFL/SMIM30/NAIP/IRAK3/STAT2/ROBO1/SH2B3/CARD16/PTPRC	0.0171015	0.946262	p0_0.0171015449833744	p1_0.946261682242991
GO:0001961	positive regulation of cytokine-mediated signaling pathway	53	0.260949	0.834741	0.765217	0.915432	0.808953	1893	tags=13%, list=9%, signal=12%	MMP12/TICAM2/CD74/C1QTNF4/TRIM6/MMP8/WNT5A	positive regulation of cytokine-mediated signaling pathway	56	-0.399128	-1.37109	0.062212	0.493538	0.459751	3577	tags=34%, list=17%, signal=28%	IRF7/ADAM17/NLRC5/MED1/HSPA1B/TRIM56/PARP14/WNT5A/AXL/CASP4/LSM14A/TSLP/NLRP6/TRIM32/PARP9/GAS6/CD300LF/EDN1/ZBP1	positive regulation of cytokine-mediated signaling pathway	53	0.440892	1.62556	0.0172016	0.715658	0.715658	3456	tags=32%, list=19%, signal=26%	CXCR4/TREM2/GFI1/NLRC5/IKBKE/HSPA1B/GAS6/IRF7/CD74/IL1R1/LAPTM5/IL7/TRAF2/ZBP1/CASP1/EDN1/CSF1	0.0172016	0.765217	p0_0.0172015944548209	p3_0.765217391304348
GO:0001963	synaptic transmission, dopaminergic	24	-0.425395	-1.13774	0.286267	0.625626	0.552856	608	tags=25%, list=3%, signal=24%	RASD2/CHRNB2/SLC6A4/DRD4/PTGS2/ADORA2A	synaptic transmission, dopaminergic	27	0.304989	0.882399	0.651934	0.923185	0.859985	2501	tags=19%, list=12%, signal=16%	DRD2/TOR1A/COMT/SLC6A3/TH	synaptic transmission, dopaminergic	14	-0.407244	-0.888566	0.596726	1	1	2315	tags=36%, list=13%, signal=31%	CDK5/RASD2/PTGS2/SNCA/SLC6A4	0.286267	0.651934	p3_0.286266924564797	p1_0.651933701657459
GO:0001964	startle response	25	0.372719	1.02239	0.425311	0.731585	0.64649	2327	tags=24%, list=12%, signal=21%	GRIN2A/DRD1/CSMD1/GRID2/SLITRK6/DRD2	startle response	27	0.433764	1.25497	0.160221	0.666728	0.621085	1855	tags=30%, list=9%, signal=27%	GRIN2D/TUBA1A/PENK/DRD2/GRIN3A/COMT/SLC6A3/KCNA1	startle response	12	0.513322	1.31115	0.158046	1	1	5583	tags=67%, list=31%, signal=46%	UCN/CSMD1/PTEN/COMT/GLRB/NPR2/CHD8/BACE1	0.158046	0.425311	p0_0.158045977011494	p3_0.425311203319502
GO:0001967	suckling behavior	11	-0.477058	-1.06328	0.394531	0.711949	0.629138	4423	tags=36%, list=22%, signal=28%	DERL2/APP/CNTFR/HAND2	suckling behavior	12	0.335092	0.799443	0.753731	0.955345	0.889944	87	tags=8%, list=0%, signal=8%	DERL2	suckling behavior	10	-0.422809	-0.876404	0.623853	1	1	4009	tags=50%, list=22%, signal=39%	HAND2/UBR3/PEX13/UBE2Q1/CNTFR	0.394531	0.753731	p3_0.39453125	p1_0.753731343283582
GO:0001973	G protein-coupled adenosine receptor signaling pathway	10	-0.413629	-0.897204	0.59519	0.834743	0.737649	21	tags=50%, list=0%, signal=50%	ADA/NECAB2/ADORA2B/ADCY5/ADORA2A	G protein-coupled adenosine receptor signaling pathway	10	0.424782	0.968416	0.510397	0.876644	0.81663	5775	tags=40%, list=27%, signal=29%	P2RY1/ADA/GNAI2/P2RY12	G protein-coupled adenosine receptor signaling pathway	7	-0.525679	-1.02122	0.465378	1	1	2925	tags=43%, list=16%, signal=36%	P2RY12/ADA/ADCY5	0.465378	0.59519	p0_0.465378421900161	p3_0.595190380761523
GO:0001974	blood vessel remodeling	42	-0.376064	-1.10555	0.283302	0.623205	0.550716	4472	tags=33%, list=22%, signal=26%	MDM2/TGFB1/EXT1/RSPO3/EPAS1/CCR2/FLT4/FOXC1/CHD7/CBS/JAG1/NPR3/LIF/CEACAM1	blood vessel remodeling	46	-0.322782	-1.08147	0.322718	0.794763	0.740354	3787	tags=30%, list=18%, signal=25%	CBS/RBPJ/CHD7/CRB1/AXL/EPAS1/HOXA3/FOXC1/SEMA3C/CEACAM1/MIR17/BMPR2/ACVR2B/MEF2C	blood vessel remodeling	39	0.245313	0.82839	0.753304	1	1	3530	tags=28%, list=19%, signal=23%	NDP/AGT/CCR2/TGFB1/BAX/CEACAM1/ACE/BAK1/BCR/ACVRL1/EXT1	0.283302	0.753304	p3_0.283302063789869	p0_0.753303964757709
GO:0001975	response to amphetamine	31	-0.351613	-0.989837	0.469501	0.759328	0.671007	2010	tags=19%, list=10%, signal=17%	HDAC9/CNR2/NR4A1/DRD4/EDN1/ADORA2A	response to amphetamine	33	0.249083	0.757807	0.834234	0.966142	0.900001	4662	tags=27%, list=22%, signal=21%	SLC18A2/DRD2/COMT/TH/ASIC1/EDNRA/OXTR/HDAC2/RANBP2	response to amphetamine	23	0.246723	0.742439	0.81362	1	1	4183	tags=43%, list=23%, signal=33%	SLC1A1/RGS2/HDAC6/RGS4/HDAC9/COMT/HPRT1/EDN1/OXTR/PPP1R9B	0.469501	0.834234	p3_0.469500924214418	p1_0.834234234234234
GO:0001976	nervous system process involved in regulation of systemic arterial blood pressure	12	-0.729351	-1.67303	0.013948	0.15374	0.135858	2785	tags=58%, list=14%, signal=50%	CALCA/MANF/TACR1/ADRA1A/TNNI3/SOD2/ACE2	nervous system process involved in regulation of systemic arterial blood pressure	14	0.439626	1.08458	0.35249	0.810826	0.755318	754	tags=20%, list=4%, signal=19%	TNNI3/MANF/DRD2	nervous system process involved in regulation of systemic arterial blood pressure	9	-0.747549	-1.52464	0.0672783	1	1	3274	tags=78%, list=18%, signal=64%	MECP2/RPS6KA2/SOD2/P2RX2/TACR1/ACE2/CALCA	0.013948	0.35249	p3_0.0139479823178327	p1_0.352490421455939
GO:0001977	renal system process involved in regulation of blood volume	12	-0.547329	-1.2555	0.207156	0.547389	0.483719	1466	tags=25%, list=7%, signal=23%	PTPRO/PDGFB/GJA5	renal system process involved in regulation of blood volume	14	0.347029	0.856136	0.662835	0.927763	0.86425	4604	tags=36%, list=22%, signal=28%	F2RL1/CYP11B2/CORO2B/HSD11B2/CYP4F2	renal system process involved in regulation of blood volume	10	0.542434	1.30559	0.172414	1	1	2799	tags=50%, list=15%, signal=42%	F2R/F2RL1/GAS6/PTPRO/GJA5	0.172414	0.662835	p0_0.172413793103448	p1_0.662835249042146
GO:0001990	regulation of systemic arterial blood pressure by hormone	33	-0.4523	-1.28621	0.124771	0.440435	0.389205	3700	tags=39%, list=18%, signal=32%	F2RL1/RASL10B/COMT/AVPR1B/EDN2/ECE1/PCSK5/TACR1/CPA3/NOX1/EDN1/ACE2/SUCNR1	regulation of systemic arterial blood pressure by hormone	39	0.238803	0.756027	0.857923	0.968591	0.902283	2122	tags=13%, list=10%, signal=12%	SUCNR1/AVPR1A/F2RL1/COMT/NOS3	regulation of systemic arterial blood pressure by hormone	30	-0.397688	-1.0119	0.415567	1	1	3415	tags=40%, list=19%, signal=33%	HSD11B2/AGTR1/RPS6KA2/AVPR2/TACR1/SERPINF2/ACE2/RASL10B/CORIN/CTSG/CPA3/AVPR1A	0.124771	0.857923	p3_0.124770642201835	p1_0.85792349726776
GO:0001991	regulation of systemic arterial blood pressure by circulatory renin-angiotensin	17	-0.510939	-1.2585	0.178161	0.511807	0.452276	4158	tags=41%, list=21%, signal=33%	ATP6AP2/F2RL1/COMT/PCSK5/CPA3/ACE2/SUCNR1	regulation of systemic arterial blood pressure by circulatory renin-angiotensin	18	0.485386	1.27149	0.16	0.666728	0.621085	1614	tags=17%, list=8%, signal=15%	SUCNR1/F2RL1/COMT	regulation of systemic arterial blood pressure by circulatory renin-angiotensin	15	0.374357	1.00241	0.447853	1	1	257	tags=20%, list=1%, signal=20%	F2R/ENPEP/F2RL1	0.16	0.447853	p1_0.16	p0_0.447852760736196
GO:0002002	regulation of angiotensin levels in blood	10	-0.539544	-1.17033	0.280561	0.622627	0.550206	1697	tags=50%, list=8%, signal=46%	NDST2/CTSZ/ATP6AP2/CPA3/ACE2	regulation of angiotensin levels in blood	10	0.343271	0.782589	0.765595	0.95722	0.89169	7793	tags=50%, list=37%, signal=31%	NDST2/CMA1/ACE2/ATP6AP2/ENPEP	regulation of angiotensin levels in blood	9	-0.468492	-0.955497	0.521407	1	1	1375	tags=33%, list=8%, signal=31%	ACE2/CTSG/CPA3	0.280561	0.765595	p3_0.280561122244489	p1_0.765595463137996
GO:0002009	morphogenesis of an epithelium	461	-0.297566	-1.19766	0.0632716	0.3295	0.291174	2854	tags=20%, list=14%, signal=18%	TCF15/WNT3A/SYNE4/SHH/CTNS/MSX2/KIF26B/KRT17/BMP2/MMRN2/CSF1/PIK3CD/ID4/SNAI1/FZD3/STAT1/ADAM17/WNT4/HOXB13/COL5A1/RALA/GRHL3/NTN1/BRSK1/NKX3-1/PLA2G10/GJA1/PAX8/SPRY1/MDK/FGF2/WT1/SLIT2/PTK7/TNF/FST/SPINT2/AJUBA/PDGFA/SMO/TGM2/BRSK2/KRT16/RDH10/SOX8/LAMA1/HES1/RYR2/FOXA1/COL4A1/SULF1/AIRE/JAG2/LHX1/CAV3/TGFB2/CAMSAP3/SPINT1/DDR1/JAG1/FRAS1/VEGFA/KDR/CXCL10/NRARP/DLX3/NTN4/ERBB4/TBX20/GATA4/TCAP/…	morphogenesis of an epithelium	489	-0.238	-1.10286	0.138191	0.639366	0.595596	3970	tags=24%, list=19%, signal=20%	KRT6A/TGM2/KDF1/TRIM71/PDGFA/ITGAV/TSC1/KRT16/GLI3/SMAD4/TMEM79/RIPK4/KRAS/DDR1/SKI/LGR4/RBPJ/ADAM17/ITGB5/MET/YAP1/IFT20/CCL11/MKKS/DLG5/CTNS/ERBB4/MMP2/FGFR1/MED1/LZTS2/FZD6/IFT52/TBX20/WNT9B/LRP5/MIB1/WNT5A/HHIP/NODAL/PKHD1/NOG/CITED2/DLG1/FOXH1/CTNNBIP1/EXOC5/CLASP1/WNT1/FZD5/MDK/NTN4/NFATC4/NAGLU/DLC1/MTHFD1L/PROX1/TRAF6/MTHFR/SEMA4C/ARHGAP35/ALDH1A2/SIX4/IRX1/PHACTR4/SEMA3C/EGFR/MIR221/CEAC…	morphogenesis of an epithelium	405	0.194818	0.992758	0.888439	1	1	3548	tags=25%, list=20%, signal=21%	KRT16/KRT17/SULF1/PODXL/SOX18/SIX1/CXCR4/CTHRC1/MDK/ALDH1A3/ENG/DLX3/AGT/EPHA2/DDR1/HS3ST3B1/ST14/FRZB/GATA3/EPHA4/BCL2/LBX2/PTK7/COL5A1/WNT10A/MESP1/RPGRIP1L/SNAI1/C2CD3/HESX1/TGFB1/CITED2/FGF1/WT1/CSMD1/TNC/ASTN2/PRKX/PAX8/PPP3R1/FZD6/HOXB7/IFT172/JHY/PRKD2/GLI3/GDF7/MMRN2/DNAAF1/PTEN/MET/TBX18/CD44/DLG3/SIX2/CTSZ/PML/KLHL3/NGFR/ACVR1/CEACAM1/RSPO2/SOX9/LEF1/GORAB/SEMA4C/BMP4/TSC2/FZD1/FUZ/SH3B…	0.0632716	0.888439	p3_0.0632716049382716	p0_0.888438676563477
GO:0002011	morphogenesis of an epithelial sheet	58	0.273422	0.885928	0.681514	0.877898	0.775785	2071	tags=14%, list=10%, signal=12%	BMP5/SOX11/MMP12/FERMT1/MIR221/WNT5A/DLL4/BMP7	morphogenesis of an epithelial sheet	59	-0.300842	-1.04238	0.398585	0.82553	0.769015	3538	tags=30%, list=17%, signal=25%	DDR1/ADAM17/ITGB5/TBX20/WNT5A/CLASP1/ARHGAP35/PHACTR4/MIR221/CEACAM1/MEGF8/ARHGAP12/TMEFF2/BMP7/SRF/SOX11/AJUBA/PTEN	morphogenesis of an epithelial sheet	51	-0.300174	-0.827003	0.678261	1	1	3350	tags=20%, list=18%, signal=16%	FERMT2/FLNA/PHLDB2/LRG1/ITGB3/WNT5A/FLRT3/PDPN/HBEGF/BMP5	0.398585	0.681514	p1_0.398584905660377	p3_0.681514476614699
GO:0002021	response to dietary excess	30	0.25389	0.724771	0.907527	0.977493	0.863795	2175	tags=17%, list=11%, signal=15%	ACVR1C/ADRB2/RMI1/VGF/PPARGC1A	response to dietary excess	36	-0.210912	-0.664051	0.942094	0.986529	0.918993	4249	tags=22%, list=20%, signal=18%	PRLH/ACVR1C/PCSK1N/STK39/SORL1/SGIP1/GDF15/ADRB2	response to dietary excess	24	0.289181	0.873965	0.633094	1	1	4143	tags=42%, list=23%, signal=32%	SGIP1/GDF15/APOE/CNTN2/TRPV4/TRPV1/APPL2/RMI1/ACVR1C/RASAL2	0.633094	0.942094	p0_0.633093525179856	p1_0.942093541202673
GO:0002024	diet induced thermogenesis	11	-0.278364	-0.620423	0.902344	0.9748	0.861416	5444	tags=45%, list=27%, signal=33%	TRPV1/MC4R/TRPV4/SCTR/ADRB1	diet induced thermogenesis	13	-0.437508	-1.07506	0.371002	0.810826	0.755318	2187	tags=15%, list=10%, signal=14%	SORL1/ADRB2	diet induced thermogenesis	8	-0.397716	-0.789896	0.722135	1	1	583	tags=25%, list=3%, signal=24%	OMA1/ADRB1	0.371002	0.902344	p1_0.371002132196162	p3_0.90234375
GO:0002026	regulation of the force of heart contraction	25	-0.493601	-1.32346	0.123077	0.438868	0.38782	3414	tags=52%, list=17%, signal=43%	CSRP3/SLC9A1/EDN2/ADRB1/GAA/RYR2/MYH6/MYH7/ADRA1A/MYL3/ATP1A2/PLN/MYL2	regulation of the force of heart contraction	25	-0.428809	-1.2437	0.156733	0.665306	0.61976	3200	tags=27%, list=15%, signal=23%	MYH7/MYL3/EDN2/ATP2A2/ADRA1A/SLC8A1/ADM	regulation of the force of heart contraction	18	-0.421988	-0.983533	0.47067	1	1	4885	tags=50%, list=27%, signal=37%	ATP2B4/ATP2A2/CAV1/PLN/ATP1A2/ADM/RYR2/MYL3/ADRB1	0.123077	0.47067	p3_0.123076923076923	p0_0.470670391061453
GO:0002027	regulation of heart rate	94	-0.523595	-1.76365	0.000284688	0.0105792	0.00934868	2036	tags=35%, list=10%, signal=32%	TPM1/TNF/SCN3B/CACNA1D/NPPA/PDE4D/ADRA1B/DMD/CASQ2/KCNE4/JUP/GJD3/CACNA2D1/RYR2/CAV3/HRC/DSP/MYH6/SPX/KCNJ3/KCNQ1/HCN4/KCNE3/MYH7/ADRA1A/ISL1/PLN/GCH1/PKP2/KCND3/EDN1/HEY2/ADM2	regulation of heart rate	99	-0.309917	-1.17354	0.180952	0.685731	0.638787	2941	tags=24%, list=14%, signal=21%	KCNE4/SREBF1/RGS4/KCNJ2/BIN1/ADM2/SPX/CTNNA3/SCN3B/EDN2/EPAS1/ATP2A2/ADRA1A/FKBP1B/JUP/KCNH2/DSG2/NOS1AP/SLC8A1/ISL1/EDN1/DSP/SCN4B/ADM	regulation of heart rate	78	-0.383587	-1.11583	0.317757	1	1	4855	tags=40%, list=27%, signal=29%	ATP2A2/CAV1/KCNA5/ANK2/POPDC2/CTNNA3/KCND3/PLN/KCNJ8/CASQ2/KCNJ5/ADM/DSG2/TNNI3K/ISL1/DMD/ADA/PDE4D/SCN2B/KCNE3/NOS1AP/CACNB2/SCN3B/RYR2/SHOX2/BVES/KCNJ2/CACNA1D/ADRB1/CAV3/AVPR1A	0.000284688	0.317757	p3_0.000284687959209239	p0_0.317757009345794
GO:0002028	regulation of sodium ion transport	77	-0.336436	-1.10369	0.284211	0.623621	0.551084	1854	tags=32%, list=9%, signal=30%	SLC9A1/ANK3/SCN5A/NKAIN4/PTPN3/SCN1B/WNK3/NKAIN3/SCN3B/SIK1/DMD/FXYD4/SERPINE2/CAV3/HECW2/PRSS8/FXYD3/ATP1A2/PCSK9/FGF11/TESC/DRD4/PKP2/GRP/NKX2-5	regulation of sodium ion transport	78	-0.292798	-1.06052	0.345499	0.805376	0.750241	4006	tags=24%, list=19%, signal=20%	CHP1/ACTN4/MLLT6/HECW1/DMPK/SLMAP/FGF13/STK39/WNK3/NKAIN4/DLG1/SCN3B/PRSS8/WNK1/DRD4/ADRB2/NEDD4L/CNKSR3/SCN4B	regulation of sodium ion transport	64	-0.311879	-0.882833	0.615385	1	1	3712	tags=30%, list=20%, signal=24%	ATP1A2/FGF12/YWHAH/DMD/OSR1/FXYD7/WNK3/DMPK/NEDD4/SCN2B/WNK2/SIK1/SCN3B/SLMAP/CNTN1/FXYD3/PRSS8/TESC/CAV3	0.284211	0.615385	p3_0.284210526315789	p0_0.615384615384615
GO:0002029	desensitization of G protein-coupled receptor signaling pathway	14	0.415665	0.980381	0.49076	0.772974	0.683065	2327	tags=29%, list=12%, signal=25%	GRM5/ADRB2/GTF2H2/DRD2	desensitization of G protein-coupled receptor signaling pathway	17	-0.6458	-1.72575	0.0102644	0.173561	0.161679	623	tags=18%, list=3%, signal=17%	HTR2B/ADRB2/ADM	desensitization of G protein-coupled receptor signaling pathway	11	0.275623	0.686192	0.874652	1	1	4611	tags=36%, list=25%, signal=27%	HTR2B/GRK2/APLNR/ARRB2	0.0102644	0.874652	p1_0.010264384419009	p0_0.874651810584958
GO:0002031	G protein-coupled receptor internalization	10	0.291005	0.632754	0.922465	0.984691	0.870156	2327	tags=20%, list=12%, signal=18%	GTF2H2/DRD2	G protein-coupled receptor internalization	13	-0.645684	-1.58659	0.0208941	0.237492	0.221234	623	tags=15%, list=3%, signal=15%	HTR2B/ADM	G protein-coupled receptor internalization	7	0.33902	0.728109	0.784777	1	1	560	tags=14%, list=3%, signal=14%	HTR2B	0.0208941	0.922465	p1_0.0208940678707651	p3_0.922465208747515
GO:0002040	sprouting angiogenesis	123	-0.282886	-0.992535	0.463415	0.757094	0.669033	4339	tags=31%, list=21%, signal=24%	YJEFN3/ESM1/EPHA2/MAP2K5/TGFB1/MIA3/TEK/PTK2B/RSPO3/BMP4/EFNB2/APLNR/MIR503/BMPER/MMRN2/RAMP2/THBS1/RHOJ/TNN/FLT4/HDAC9/FGF2/SLIT2/LOXL2/SEMA5A/GPLD1/NR4A1/PLK2/CLEC14A/CDH13/PGF/PPP1R16B/VEGFA/KDR/NRARP/FUT1/CEACAM1/PTGS2	sprouting angiogenesis	128	0.286323	1.11306	0.24525	0.736326	0.685918	3377	tags=19%, list=16%, signal=16%	EGR3/TSPAN18/NOTCH1/ANXA1/TGFB1/ADTRP/ITGA5/JMJD8/ACVRL1/JMJD6/CIB1/E2F8/KDR/PGF/CREB3L1/E2F2/GHSR/STARD13/CDC42/FGFBP1/DLL1/OTULIN/ITGB1/KLF2/IL12A	sprouting angiogenesis	119	-0.254843	-0.770118	0.825112	1	1	3287	tags=20%, list=18%, signal=17%	IL10/AGTR1/VSTM4/RSPO3/CLEC14A/SEMA6A/THBS1/GPLD1/GHRL/FGFBP1/TGFBR3/PTGS2/FBXW7/KDR/ESM1/GREM1/NR4A1/FLT4/TSPAN18/GATA2/RAMP2/PIK3R3/CCBE1/VEGFD	0.24525	0.825112	p1_0.245250431778929	p0_0.825112107623318
GO:0002042	cell migration involved in sprouting angiogenesis	56	-0.395195	-1.22479	0.168174	0.502584	0.444126	3194	tags=27%, list=16%, signal=23%	EFNB2/MIR503/MMRN2/THBS1/RHOJ/HDAC9/FGF2/SLIT2/GPLD1/NR4A1/PLK2/CLEC14A/VEGFA/KDR/PTGS2	cell migration involved in sprouting angiogenesis	55	0.302261	1.02501	0.412281	0.833328	0.776279	1327	tags=11%, list=6%, signal=10%	EGR3/NOTCH1/ANXA1/ADTRP/CIB1/KDR	cell migration involved in sprouting angiogenesis	53	-0.3303	-0.910511	0.563975	1	1	5032	tags=36%, list=28%, signal=26%	MAP3K3/PIK3C2A/SLIT2/VEGFA/PLK2/ABL1/DLL4/CLEC14A/THBS1/GPLD1/FGFBP1/TGFBR3/PTGS2/FBXW7/KDR/GREM1/NR4A1/GATA2/PIK3R3	0.168174	0.563975	p3_0.168173598553345	p0_0.563975155279503
GO:0002043	blood vessel endothelial cell proliferation involved in sprouting angiogenesis	25	-0.415849	-1.11499	0.288462	0.626214	0.553375	3336	tags=44%, list=17%, signal=37%	BMP4/APLNR/MIR503/BMPER/MMRN2/THBS1/FGF2/SEMA5A/PPP1R16B/VEGFA/NRARP	blood vessel endothelial cell proliferation involved in sprouting angiogenesis	23	0.244043	0.684118	0.898182	0.976832	0.90996	3377	tags=12%, list=16%, signal=11%	ACVRL1/FGFBP1/IL12A	blood vessel endothelial cell proliferation involved in sprouting angiogenesis	21	0.343053	1.00261	0.455479	1	1	3663	tags=43%, list=20%, signal=34%	JCAD/EPHA2/SEMA5A/MMRN2/NGFR/BMP4/BMPER/ACVRL1/APLNR	0.288462	0.898182	p3_0.288461538461538	p1_0.898181818181818
GO:0002052	positive regulation of neuroblast proliferation	35	-0.454856	-1.30561	0.107807	0.418243	0.369595	3177	tags=43%, list=16%, signal=36%	DMRTA2/SHH/VCAN/ID4/FZD3/FOXG1/BCAN/FGF2/SMO/NCAN/DCT/HAPLN1/VEGFA/HAPLN4/CX3CL1	positive regulation of neuroblast proliferation	37	0.384013	1.19692	0.188406	0.687393	0.640335	3610	tags=26%, list=17%, signal=22%	NOTCH1/NCAN/BCAN/DRD2/KDM1A/PAX6/HAPLN3/ITGB1/HAPLN4/DISC1	positive regulation of neuroblast proliferation	24	0.380115	1.14878	0.266187	1	1	1919	tags=21%, list=11%, signal=19%	HAPLN1/DISC1/ACAN/GLI3/VCAN	0.107807	0.266187	p3_0.107806691449814	p0_0.266187050359712
GO:0002053	positive regulation of mesenchymal cell proliferation	26	-0.343218	-0.928687	0.553875	0.807561	0.713629	2806	tags=35%, list=14%, signal=30%	SHH/IRS2/SYNE1/STAT1/FGF9/PDGFA/SMO/TBX1/KDR	positive regulation of mesenchymal cell proliferation	26	0.265183	0.76322	0.833948	0.966142	0.900001	2992	tags=19%, list=14%, signal=17%	SIX1/KDR/SYNE1/WNT2/SOX9	positive regulation of mesenchymal cell proliferation	24	-0.478285	-1.17265	0.26105	1	1	2125	tags=33%, list=12%, signal=29%	FGF9/MYC/KDR/TBX1/WNT2/WNT5A/FOXF1/SHOX2	0.26105	0.833948	p0_0.261049723756906	p1_0.833948339483395
GO:0002062	chondrocyte differentiation	105	-0.335307	-1.14957	0.2	0.53731	0.474812	3998	tags=33%, list=20%, signal=27%	EXT1/NFIB/SMAD7/ZNF219/GLG1/SCIN/EXT2/COL11A1/BMP4/ADAMTS7/SERPINH1/COL3A1/MSX2/BMP2/TGFBI/LTBP3/COL2A1/MUSTN1/TGFBR1/EIF2AK3/MATN1/FGF9/MDK/ARID5A/CYTL1/LOXL2/TSKU/GPLD1/SULF1/SLC39A14/WNT10B/EFEMP1/SULF2/GDF6/BMP6	chondrocyte differentiation	108	0.258462	0.984778	0.483926	0.863543	0.804426	3411	tags=19%, list=16%, signal=16%	RARB/TGFB1/NPPC/TSKU/BMP2/CYTL1/OSR2/ACVRL1/TGFBR1/SERPINH1/COMP/FGF18/RARG/SOX9/COL3A1/RB1/WNT10B/MEF2D/COL2A1/MAPK14	chondrocyte differentiation	102	0.360337	1.49514	0.00505698	0.41187	0.41187	3588	tags=39%, list=20%, signal=32%	CYTL1/SULF1/COMP/PTHLH/MDK/LOXL2/SCIN/CHST11/SMPD3/SLC39A14/ECM1/TGFB1/ADAMTS7/BMP6/IFT80/COL11A1/RFLNA/GLI3/COL3A1/SULF2/RUNX3/RUNX2/RUNX1/CHSY1/SIX2/MEX3C/MBOAT2/SOX9/SCX/BMP4/SMAD7/WNT2B/MSX2/PKDCC/SNAI2/ACVRL1/SMAD3/EFEMP1/EXT1/TGFBI	0.00505698	0.483926	p0_0.00505697760143204	p1_0.483925549915398
GO:0002063	chondrocyte development	29	-0.328934	-0.910677	0.598881	0.837773	0.740327	3998	tags=34%, list=20%, signal=28%	EXT1/SMAD7/COL11A1/SERPINH1/MSX2/EIF2AK3/MATN1/TSKU/SULF1/SULF2	chondrocyte development	29	0.282214	0.827858	0.750466	0.954402	0.889065	2992	tags=21%, list=14%, signal=18%	TSKU/SERPINH1/COMP/FGF18/RARG/SOX9	chondrocyte development	30	0.444364	1.38538	0.0456794	1	1	2611	tags=47%, list=14%, signal=40%	SULF1/COMP/PTHLH/CHST11/SMPD3/ECM1/COL11A1/RFLNA/SULF2/RUNX2/CHSY1/MEX3C/SOX9/SMAD7	0.0456794	0.750466	p0_0.0456793623428161	p1_0.750465549348231
GO:0002064	epithelial cell development	199	-0.427231	-1.5818	0.000474845	0.0157349	0.0139047	3433	tags=28%, list=17%, signal=23%	FASN/EPAS1/FOXP3/BMP4/COL18A1/GATA1/GRHL2/SIX3/TJP3/ROS1/STC1/RILPL2/ABCA12/HOXB13/VSIG1/ACTA2/GJA1/ATF4/PECAM1/CDKN1A/TNF/PDE2A/HEG1/SPINT2/PDE4D/CCDC88C/GPR4/TMIGD1/SMO/PROC/SOX8/B4GALT1/FOXA1/RAB25/TLR9/ONECUT1/NTRK1/JAG1/PPP1R16B/VEGFA/KDR/SLC9A4/CDH2/CXCR4/F11R/BHLHA15/DACT2/CLDN1/SOX18/ICAM1/CDH5/BMP6/PDGFB/IL1A/IL1B	epithelial cell development	208	0.251496	1.03443	0.362393	0.810826	0.755318	3086	tags=17%, list=15%, signal=14%	RARB/MYADM/SIPA1L3/NOTCH1/PECAM1/ROBO4/MYD88/RFX3/BFSP2/MSN/TJP2/F2RL1/FOXJ1/CDH5/SOX8/TP63/C1GALT1/KDR/FRS2/CLDN5/ACTA2/TFCP2L1/ADAM7/CLIC4/GRHL2/BHLHA15/ST14/RAP1B/RARG/DLL1/HOXB13/PAX6/SOX9/KRT2/SDC1	epithelial cell development	174	-0.304634	-0.951999	0.573248	1	1	4802	tags=28%, list=27%, signal=21%	ROCK2/VEGFA/FLNB/CDKN1A/COL27A1/IL1A/S1PR3/YAP1/MYD88/RAP1A/SFN/EXPH5/RAPGEF3/GJA1/RAPGEF1/EPB41L5/ROBO4/BFSP1/PALLD/NTRK1/CLDN3/TNMD/FLNA/ACTA2/FRMD6/ADAMTSL4/ICAM1/PDE4D/TFCP2L1/MARVELD2/ROS1/WNT7B/POF1B/SDC1/PLCB1/S1PR2/PDE2A/KDR/FOXA1/PROX1/FZD5/WNT5A/BMP5/GATA2/TJP2/CDH5/CLDN5/PTPRS/GPX1	0.000474845	0.573248	p3_0.000474845226779111	p0_0.573248407643312
GO:0002065	columnar/cuboidal epithelial cell differentiation	110	-0.363823	-1.25405	0.0828829	0.370445	0.327357	2653	tags=25%, list=13%, signal=22%	BMP2/TMEM231/ROS1/WNT4/GJA1/FGF2/NR5A2/CDKN1A/PTK6/FST/TMIGD1/SMO/SERPINE1/GATA6/HES1/FOXA1/TLR9/ONECUT1/JAG1/IL13/SLC9A4/CDH2/DLX3/GATA4/BHLHA15/POU3F2/GATA5/BMP6	columnar/cuboidal epithelial cell differentiation	119	0.317063	1.21372	0.114035	0.596461	0.555629	3234	tags=21%, list=15%, signal=18%	RARB/ASCL1/NOTCH1/MSX1/TGFB1/WDR77/RFX3/EMX1/TMEM231/BMP2/TUBB/PDX1/TP63/C1GALT1/SERPINE1/IL31RA/VAX1/BCCIP/BHLHA15/RARG/DLL1/PAX6/SOX9/CLCN2/HES1	columnar/cuboidal epithelial cell differentiation	86	-0.226329	-0.66456	0.92093	1	1	2470	tags=13%, list=14%, signal=11%	ROS1/MSX1/NR5A2/FOXA1/PROX1/FZD5/WNT5A/CLCN2/BMP5/GATA2/AGR2	0.0828829	0.92093	p3_0.0828828828828829	p0_0.92093023255814
GO:0002066	columnar/cuboidal epithelial cell development	48	-0.326413	-0.986353	0.476103	0.763446	0.674645	2156	tags=21%, list=11%, signal=19%	ROS1/GJA1/CDKN1A/TMIGD1/SMO/TLR9/SLC9A4/CDH2/BHLHA15/BMP6	columnar/cuboidal epithelial cell development	48	0.301528	0.991584	0.457565	0.848494	0.790408	4977	tags=29%, list=24%, signal=22%	RARB/RFX3/C1GALT1/BHLHA15/RARG/DLL1/PAX6/ROS1/CDK6/HIF1A/TYMS/INSM1/CLOCK/RHEB	columnar/cuboidal epithelial cell development	40	-0.234215	-0.615934	0.934194	1	1	1132	tags=10%, list=6%, signal=9%	FZD5/WNT5A/BMP5/GATA2	0.457565	0.934194	p1_0.457564575645756	p0_0.934193548387097
GO:0002067	glandular epithelial cell differentiation	63	-0.32488	-1.02867	0.388298	0.707881	0.625543	2653	tags=32%, list=13%, signal=28%	SIDT2/SPDEF/EXT1/NFIB/FASN/BMP4/BMP2/WNT4/FGF2/NR5A2/SMO/GATA6/HES1/FOXA1/ONECUT1/IL13/SLC9A4/CDH2/BHLHA15/BMP6	glandular epithelial cell differentiation	68	0.433664	1.51857	0.00533229	0.124039	0.115547	3234	tags=24%, list=15%, signal=20%	RARB/ASCL1/NOTCH1/WDR77/RFX3/BMP2/PDX1/TP63/IL31RA/BHLHA15/RARG/DLL1/PAX6/SOX9/CLCN2/HES1	glandular epithelial cell differentiation	49	-0.36918	-1.00386	0.430013	1	1	1383	tags=18%, list=8%, signal=17%	NR5A2/FOXA1/PROX1/FZD5/WNT5A/CLCN2/BMP5/GATA2/AGR2	0.00533229	0.430013	p1_0.00533228876848018	p0_0.430012610340479
GO:0002068	glandular epithelial cell development	32	-0.363734	-1.02645	0.422509	0.730684	0.645694	1502	tags=16%, list=7%, signal=14%	SMO/SLC9A4/CDH2/BHLHA15/BMP6	glandular epithelial cell development	33	0.362054	1.10151	0.317117	0.791003	0.736852	4977	tags=33%, list=24%, signal=25%	RARB/RFX3/BHLHA15/RARG/DLL1/PAX6/CDK6/HIF1A/INSM1/CLOCK/RHEB	glandular epithelial cell development	27	-0.336473	-0.837963	0.65075	1	1	1132	tags=15%, list=6%, signal=14%	FZD5/WNT5A/BMP5/GATA2	0.317117	0.65075	p1_0.317117117117117	p0_0.65075034106412
GO:0002069	columnar/cuboidal epithelial cell maturation	14	0.381408	0.899583	0.593429	0.833747	0.73677	1977	tags=29%, list=10%, signal=26%	NKX6-1/TYMS/HOXA5/PGR	columnar/cuboidal epithelial cell maturation	13	0.31087	0.756758	0.797373	0.964324	0.898307	4659	tags=31%, list=22%, signal=24%	RFX3/BHLHA15/HIF1A/TYMS	columnar/cuboidal epithelial cell maturation	11	-0.454415	-0.95304	0.513219	1	1	1132	tags=73%, list=6%, signal=68%	GDF11/HIF1A/PGR/RFX3/CDKN1A/GJA1/FZD5/GATA2	0.513219	0.797373	p0_0.513219284603421	p1_0.797373358348968
GO:0002070	epithelial cell maturation	25	-0.374384	-1.00381	0.421154	0.730229	0.645292	3409	tags=40%, list=17%, signal=33%	AKR1B1/EPAS1/SIX3/HOXB13/GJA1/CDKN1A/TMIGD1/FOXA1/KDR/BHLHA15	epithelial cell maturation	24	0.352198	0.994093	0.459165	0.848494	0.790408	4659	tags=38%, list=22%, signal=29%	RFX3/KDR/TFCP2L1/BHLHA15/HOXB13/SIX3/KCNE1/HIF1A/TYMS	epithelial cell maturation	19	-0.476355	-1.11324	0.295775	1	1	2607	tags=58%, list=14%, signal=50%	PGR/FEM1B/EPAS1/RFX3/CDKN1A/GJA1/TFCP2L1/KDR/FOXA1/FZD5/GATA2	0.295775	0.459165	p0_0.295774647887324	p1_0.459165154264973
GO:0002076	osteoblast development	17	-0.359423	-0.8853	0.630268	0.851506	0.752463	4005	tags=35%, list=20%, signal=28%	JUND/LRP5/SHH/MSX2/TNN/ACHE	osteoblast development	17	-0.342432	-0.915071	0.581053	0.907327	0.845213	2680	tags=29%, list=13%, signal=26%	HOXA2/LRP5/LIMD1/JUND/SATB2	osteoblast development	15	0.428508	1.14741	0.269939	1	1	3451	tags=47%, list=19%, signal=38%	PTHLH/RUNX2/MEN1/CLEC5A/LRP5/MSX2/SMAD3	0.269939	0.630268	p0_0.269938650306748	p3_0.630268199233716
GO:0002082	regulation of oxidative phosphorylation	21	-0.568045	-1.48195	0.0553435	0.315911	0.279165	5900	tags=48%, list=29%, signal=34%	TMEM135/COX7A2L/SLC25A33/ACTN3/SLC25A23/SHMT2/TNF/NUPR1/AK4/MLXIPL	regulation of oxidative phosphorylation	21	-0.435592	-1.22443	0.191721	0.687393	0.640335	4343	tags=29%, list=21%, signal=23%	SHMT2/COX7A2/COX7A2L/MIR210/NUPR1/AK4	regulation of oxidative phosphorylation	21	-0.390358	-0.92936	0.543662	1	1	5180	tags=29%, list=29%, signal=20%	ACTN3/SLC25A23/NUPR1/ABCD1/SNCA/MLXIPL	0.0553435	0.543662	p3_0.0553435114503817	p0_0.543661971830986
GO:0002087	regulation of respiratory gaseous exchange by nervous system process	9	0.436665	0.921585	0.567729	0.81693	0.721908	2345	tags=33%, list=12%, signal=29%	NLGN3/ADORA1/PBX3	regulation of respiratory gaseous exchange by nervous system process	13	-0.217124	-0.533524	0.965885	0.993109	0.925122	16445	tags=62%, list=78%, signal=13%	ATP1A2/CC2D1A/GSX2/NLGN3/ADORA1/NLGN2/GLS/MECP2	regulation of respiratory gaseous exchange by nervous system process	7	-0.437848	-0.85059	0.650564	1	1	6093	tags=43%, list=34%, signal=28%	PBX3/MECP2/ATP1A2	0.567729	0.965885	p3_0.567729083665339	p1_0.965884861407249
GO:0002088	lens development in camera-type eye	77	0.242152	0.8202	0.854167	0.955324	0.844205	3726	tags=23%, list=18%, signal=19%	SOX11/WNT7B/CRYGN/MAF/SHROOM2/WNT5B/WNT2/WNT5A/SLITRK6/CRYBA2/NDP/SPRED1/HIPK2/CDKN1C/SPRY2/FOXE3/CRYBB3/SOX1	lens development in camera-type eye	85	-0.341989	-1.27213	0.0813953	0.535578	0.498913	3751	tags=26%, list=18%, signal=21%	ABI2/SKI/FOXE3/SLC7A11/CTNS/TMOD1/MED1/WNT5A/CITED2/DLG1/CRYGC/PROX1/NHS/ATF4/MEIS1/CDKN1B/BFSP1/HIPK2/CRYAA/CDON/SOX11/CDKN1C	lens development in camera-type eye	66	0.280302	1.0629	0.319527	1	1	4480	tags=36%, list=25%, signal=27%	NDP/EPHA2/GATA3/NECTIN1/TDRD7/CITED2/BIRC7/BCAR3/NF2/BMP4/NECTIN3/FAT1/HIPK2/WNT2B/SKI/SIX5/SPRED2/SMAD3/CRYBB2/SPRY1/MAF/NHS/CTNS/DLG1	0.0813953	0.854167	p1_0.0813953488372093	p3_0.854166666666667
GO:0002089	lens morphogenesis in camera-type eye	19	0.369281	0.944283	0.539583	0.797722	0.704934	824	tags=11%, list=4%, signal=10%	SOX11/SHROOM2	lens morphogenesis in camera-type eye	20	-0.641301	-1.76825	0.00594639	0.131075	0.122102	4096	tags=45%, list=20%, signal=36%	SOX1/ABI2/SKI/CITED2/PROX1/ATF4/MEIS1/HIPK2/SOX11	lens morphogenesis in camera-type eye	18	0.505552	1.39135	0.104895	1	1	3075	tags=50%, list=17%, signal=42%	EPHA2/NECTIN1/TDRD7/CITED2/BCAR3/BMP4/NECTIN3/HIPK2/SKI	0.00594639	0.539583	p1_0.00594638778521262	p3_0.539583333333333
GO:0002090	regulation of receptor internalization	60	-0.353939	-1.11812	0.277087	0.620201	0.548062	3438	tags=25%, list=17%, signal=21%	VAC14/DKK1/EFNB2/SYK/WNT3A/LRPAP1/SYNE1/RALA/INSR/APLN/VEGFA/SFRP4/PCSK9/DRD4/SELE	regulation of receptor internalization	61	-0.219771	-0.762836	0.888095	0.973834	0.907167	1782	tags=11%, list=8%, signal=11%	DTNBP1/DLG4/LRRTM2/DRD4/PLCG2/EFNB2/LPAR1	regulation of receptor internalization	53	-0.316965	-0.873751	0.623602	1	1	4783	tags=30%, list=26%, signal=22%	VEGFA/APLN/MKLN1/DLG4/ARRB1/ANKRD13B/OPHN1/DTNBP1/HPCA/LRRTM2/INSR/GREM1/SYK/ITGB3/RSPO1/SELE	0.277087	0.888095	p3_0.27708703374778	p1_0.888095238095238
GO:0002091	negative regulation of receptor internalization	16	0.338694	0.833171	0.702869	0.888513	0.785165	3324	tags=25%, list=16%, signal=21%	LRRTM1/LRRTM2/ANXA2/ANKRD13A	negative regulation of receptor internalization	16	-0.426573	-1.11664	0.333333	0.797438	0.742847	6100	tags=50%, list=29%, signal=36%	LRRTM1/PCSK9/WDR54/LRPAP1/ANKRD13D/SDCBP/DLG4/LRRTM2	negative regulation of receptor internalization	14	-0.251692	-0.549168	0.955357	1	1	6069	tags=36%, list=34%, signal=24%	RIN3/PCSK9/DLG4/ANKRD13B/LRRTM2	0.333333	0.955357	p1_0.333333333333333	p0_0.955357142857143
GO:0002092	positive regulation of receptor internalization	25	-0.568642	-1.52466	0.0401888	0.279896	0.24734	2858	tags=32%, list=14%, signal=28%	SYK/WNT3A/INSR/APLN/VEGFA/SFRP4/PCSK9/SELE	positive regulation of receptor internalization	26	-0.186915	-0.552684	0.976087	0.993155	0.925165	5802	tags=31%, list=28%, signal=22%	SELE/VEGFA/PCSK9/ANGPT1/EGF/NTF3/DTNBP1/PLCG2	positive regulation of receptor internalization	22	-0.398133	-0.955192	0.494413	1	1	4783	tags=41%, list=26%, signal=30%	PCSK9/VEGFA/APLN/ARRB1/DTNBP1/INSR/GREM1/SYK/SELE	0.0401888	0.976087	p3_0.0401887833396527	p1_0.976086956521739
GO:0002093	auditory receptor cell morphogenesis	14	-0.310362	-0.725342	0.825243	0.942004	0.832435	2492	tags=21%, list=12%, signal=19%	PDZD7/ANKRD24/STRC	auditory receptor cell morphogenesis	18	-0.292099	-0.792013	0.763103	0.957184	0.891657	1346	tags=33%, list=6%, signal=31%	PLS1/SLITRK6/STRC/SOD1/MYO7A/PDZD7	auditory receptor cell morphogenesis	11	-0.392531	-0.823251	0.681182	1	1	2817	tags=27%, list=16%, signal=23%	MYO7A/PLS1/CDH23	0.681182	0.825243	p0_0.681181959564541	p3_0.825242718446602
GO:0002097	tRNA wobble base modification	18	0.31428	0.785323	0.779874	0.922366	0.815081	6967	tags=33%, list=34%, signal=22%	ADAT2/ALKBH8/ELP6/GTPBP3/CTU2/ELP4	tRNA wobble base modification	18	0.712669	1.86686	0.000447464	0.0273441	0.0254721	3095	tags=44%, list=15%, signal=38%	TRMU/ELP4/ALKBH8/KTI12/MOCS3/ELP6/CTU2/ELP3	tRNA wobble base modification	20	0.313881	0.900888	0.567568	1	1	4870	tags=35%, list=27%, signal=26%	MTO1/ELP1/MOCS3/ELP5/ADAT2/KTI12/CTU2	0.000447464	0.779874	p1_0.000447464356791451	p3_0.779874213836478
GO:0002098	tRNA wobble uridine modification	15	0.400703	0.962836	0.501031	0.780273	0.689515	12122	tags=100%, list=60%, signal=40%	ALKBH8/ELP6/GTPBP3/CTU2/ELP4/URM1/DPH3/KTI12/CTU1/ELP3/MTO1/ELP5/TRMU/MOCS3/ELP2	tRNA wobble uridine modification	15	0.757355	1.91807	0.000173803	0.0139313	0.0129776	3095	tags=53%, list=15%, signal=46%	TRMU/ELP4/ALKBH8/KTI12/MOCS3/ELP6/CTU2/ELP3	tRNA wobble uridine modification	17	0.289928	0.792371	0.744966	1	1	4870	tags=35%, list=27%, signal=26%	MTO1/ELP1/MOCS3/ELP5/KTI12/CTU2	0.000173803	0.744966	p1_0.000173802838738242	p0_0.74496644295302
GO:0002115	store-operated calcium entry	19	-0.434169	-1.10134	0.335249	0.665019	0.587667	3712	tags=37%, list=18%, signal=30%	STIM1/CASQ1/ORAI3/JPH4/SARAF/STC2/SPINK1	store-operated calcium entry	20	-0.304973	-0.840898	0.719828	0.944468	0.879811	1719	tags=30%, list=8%, signal=28%	EFHB/CD84/HOMER2/SPINK1/STC2/SPG11	store-operated calcium entry	19	0.292374	0.826587	0.691781	1	1	3539	tags=37%, list=20%, signal=30%	ORAI1/MS4A1/SLC8B1/ORAI2/SPG11/HOMER3/CRACR2B	0.335249	0.719828	p3_0.335249042145594	p1_0.719827586206897
GO:0002158	osteoclast proliferation	9	-0.398528	-0.846434	0.67	0.871092	0.769771	2518	tags=33%, list=12%, signal=29%	CSF1/TNFAIP3/NPR3	osteoclast proliferation	10	0.383138	0.873476	0.627599	0.916598	0.853849	8715	tags=50%, list=41%, signal=29%	OCSTAMP/TNFSF11/GREM1/CSF1/TNFAIP3	osteoclast proliferation	8	0.323944	0.718032	0.824658	1	1	5931	tags=75%, list=33%, signal=50%	TNFAIP3/CSF1/TNFSF11/NPR3/NMB/TCIRG1	0.627599	0.824658	p1_0.627599243856333	p0_0.824657534246575
GO:0002181	cytoplasmic translation	153	-0.380213	-1.37663	0.0193889	0.184408	0.162958	7447	tags=59%, list=37%, signal=38%	RPS23/RPS9/EIF2D/RPL11/EIF2S3/NCK1/RPL22/RPL36A/RPL14/RPS29/EIF3H/RPL41/FAU/EIF3E/RPS15/RPS17/RPLP0/RPL30/UBA52/RPL7A/RPL32/RPS20/RPS24/RPL8/RPL28/RPL10A/PABPC1/RPL19/PAIP1/EIF3L/RBM24/RPL38/RPL12/RPL4/RPL5/RPS8/PARP16/RPL18/RPLP2/RPL21/RPL24/RPS16/RPS13/RPL23A/RPL15/RPS25/RPL13/RPS12/EIF3F/RPS3/RPL6/RPS5/RPL35A/RPL27/RPS3A/RPL27A/YBX3/RPL3/RPL9/RPL29/RPL7/RPL18A/RPS15A/RPS4X/RPL10/RPS6/RPL23/RPS…	cytoplasmic translation	151	0.178975	0.708803	0.996552	0.998712	0.930342	3330	tags=12%, list=16%, signal=11%	EIF2B2/EIF2B1/MIF4GD/DRG2/METTL3/FTSJ1/NMNAT2/EIF3J/RPS26/CPEB1/SYNCRIP/EIF4A1/EIF3I/DRG1/EIF2B3/RPL22L1/EIF3B/HNRNPU/ETF1	cytoplasmic translation	153	0.116811	0.507361	1	1	1	7653	tags=54%, list=42%, signal=32%	CPEB3/EIF2S3B/RPS26/EIF3C/RACK1/RPL22L1/RPS4X/EIF3D/FTSJ1/METTL3/UNK/IMPACT/RPS15A/RPS10/PABPC1/RPL22/DRG2/NCK1/RPL26L1/EIF3E/MCTS1/RPL4/RPL36A/RPS27/EIF3H/RPL30/RPL41/RPL17/RPL26/EIF4A2/DHX9/RPS3A/RPS3/RPS19/EIF2B1/RPL10/RPL32/RPS6/EIF3F/RPL24/RPL15/RPL35A/RPL23A/RPS13/RPL13/RPL37/RPL11/RPS18/EIF3L/EIF2D/RPL29/RPS11/RPS25/RPL38/RPS23/RPL36/UBA52/EIF2S3/RPS29/RPL28/RPL9/RPL14/RPL34/CNBP/RPL19/EIF…	0.0193889	1	p3_0.0193889306549952	p0_1
GO:0002183	cytoplasmic translational initiation	42	-0.193705	-0.569452	0.994371	1	0.883684	16310	tags=100%, list=81%, signal=19%	DENR/METTL3/DHX29/NCBP1/EIF2AK4/EIF2B1/EIF3C/MTOR/SLBP/EIF4A1/EIF4G1/EIF2B5/SH3BGRL/EIF3I/EIF2B4/EIF2B2/EIF3A/EIF3B/MCTS1/EIF5/EIF3J/YTHDF2/RBM4/NCBP2/IMPACT/EIF3K/EIF3D/EIF3M/EIF3G/EIF2D/EIF2S3/NCK1/EIF3H/EIF3E/EIF3L/EIF3F/RPL13A/EIF2S2/EIF4A2/MIF4GD/EIF3CL	cytoplasmic translational initiation	40	0.38006	1.20571	0.18232	0.685731	0.638787	4358	tags=30%, list=21%, signal=24%	EIF2B2/EIF2B1/MIF4GD/METTL3/EIF3J/EIF4A1/EIF3I/EIF2B3/EIF3B/YTHDF2/EIF4G1/NCBP1	cytoplasmic translational initiation	43	0.190697	0.660754	0.968326	1	1	13181	tags=98%, list=73%, signal=27%	EIF2S3B/EIF3C/EIF3D/METTL3/IMPACT/NCK1/EIF3E/MCTS1/EIF3H/EIF4A2/EIF2B1/EIF3F/EIF3L/EIF2D/EIF2S3/EIF3I/NCBP2/EIF3K/EIF3G/EIF4A1/RPL13A/MTOR/MIF4GD/EIF2B2/EIF2S2/DENR/EIF3B/YTHDF2/EIF4G1/SH3BGRL/EIF3M/SLBP/EIF2B3/EIF3J/EIF2B4/EIF2AK4/EIF5/NCBP1/RBM4/EIF3A/DHX29/EIF2B5	0.18232	0.994371	p1_0.18232044198895	p3_0.99437148217636
GO:0002200	somatic diversification of immune receptors	65	0.3647	1.20402	0.154362	0.484998	0.428585	1791	tags=14%, list=9%, signal=13%	EXO1/POLQ/ATAD5/IL10/LEF1/HMGB2/CCR6/RAG1/HMGB1	somatic diversification of immune receptors	67	0.25759	0.903045	0.665517	0.927763	0.86425	3686	tags=27%, list=18%, signal=22%	IL27RA/RAG2/TGFB1/NDFIP1/STAT6/TNFSF4/CLCF1/MLH1/HSPD1/HMGB1/SLC15A4/RAG1/MCM3AP/MSH2/PARP3/TBX21/CD28/RNF168	somatic diversification of immune receptors	69	0.351068	1.35812	0.0569264	1	1	5467	tags=43%, list=30%, signal=30%	BATF/IL27RA/CD28/CD40LG/TGFB1/KMT5C/NSD2/MSH2/PMS2/LEF1/POLL/SHLD3/DCAF1/PARP3/SHLD1/TCF3/CYREN/PAXIP1/UNG/PTPRC/POLQ/MAD2L2/BCL6/BCL11B/NBN/ERCC1/EXOSC6/HMGB2/SLC15A4/CCR6	0.0569264	0.665517	p0_0.0569263737810667	p1_0.66551724137931
GO:0002204	somatic recombination of immunoglobulin genes involved in immune response	45	0.278536	0.868665	0.713684	0.893297	0.789392	1124	tags=9%, list=6%, signal=8%	EXO1/ATAD5/IL10/CCR6	somatic recombination of immunoglobulin genes involved in immune response	46	0.299441	0.969654	0.497175	0.869673	0.810136	5580	tags=46%, list=27%, signal=34%	IL27RA/TGFB1/NDFIP1/STAT6/TNFSF4/CLCF1/MLH1/HSPD1/SLC15A4/MSH2/PARP3/TBX21/CD28/RNF168/EXOSC3/UNG/APLF/IL2/PTPRC/RNF8/EXO1	somatic recombination of immunoglobulin genes involved in immune response	48	0.391757	1.37774	0.0495079	1	1	3564	tags=31%, list=20%, signal=25%	BATF/IL27RA/CD28/CD40LG/TGFB1/KMT5C/NSD2/MSH2/PMS2/SHLD3/PARP3/SHLD1/PAXIP1/UNG/PTPRC	0.0495079	0.713684	p0_0.0495078889977189	p3_0.713684210526316
GO:0002208	somatic diversification of immunoglobulins involved in immune response	45	0.278536	0.868665	0.713684	0.893297	0.789392	1124	tags=9%, list=6%, signal=8%	EXO1/ATAD5/IL10/CCR6	somatic diversification of immunoglobulins involved in immune response	46	0.299441	0.969654	0.497175	0.869673	0.810136	5580	tags=46%, list=27%, signal=34%	IL27RA/TGFB1/NDFIP1/STAT6/TNFSF4/CLCF1/MLH1/HSPD1/SLC15A4/MSH2/PARP3/TBX21/CD28/RNF168/EXOSC3/UNG/APLF/IL2/PTPRC/RNF8/EXO1	somatic diversification of immunoglobulins involved in immune response	48	0.391757	1.37774	0.0495079	1	1	3564	tags=31%, list=20%, signal=25%	BATF/IL27RA/CD28/CD40LG/TGFB1/KMT5C/NSD2/MSH2/PMS2/SHLD3/PARP3/SHLD1/PAXIP1/UNG/PTPRC	0.0495079	0.713684	p0_0.0495078889977189	p3_0.713684210526316
GO:0002209	behavioral defense response	39	-0.365411	-1.06747	0.35305	0.680954	0.601749	3620	tags=36%, list=18%, signal=30%	PENK/FBXL20/DPP4/UCN/COMT/GRIK2/MDK/NPAS2/LYPD1/GNG7/ATP1A2/DRD4/ASIC4/GRP	behavioral defense response	41	-0.345468	-1.12143	0.251082	0.743965	0.693034	4090	tags=39%, list=19%, signal=31%	GABRA5/MECP2/HTR1A/GRPR/NEUROD2/FBXL20/MORC1/LYPD1/MDK/ALS2/DPP4/DRD1/DRD4/EP300/UCN/MEF2C	behavioral defense response	27	0.513987	1.57134	0.0123221	0.600901	0.600901	1911	tags=30%, list=11%, signal=27%	MDK/UCN/SLC1A1/NPAS2/BCL2/APOE/PDE8B/DPP4	0.0123221	0.35305	p0_0.0123220988823308	p3_0.353049907578558
GO:0002218	activation of innate immune response	246	-0.292876	-1.11841	0.200328	0.538053	0.475469	5166	tags=31%, list=26%, signal=24%	NLRP1/NEK7/ALPK1/OAS3/GBP2/RIOK3/ZNFX1/TSPAN6/HSPA1A/MARK4/DAB2IP/NFKBIL1/SARM1/TRIM11/SLC15A4/IRAK2/TLR3/NAGLU/GPR108/TAX1BP1/TRIM5/HSPA1B/NINJ1/F2RL1/TRAF3/SLC15A2/NR1H4/TYROBP/CTSS/RIPK2/KLRK1/TIFA/UNC93B1/LY96/BIRC3/MNDA/SYK/TREM2/IRF1/ZBP1/COLEC10/DDX60/DHX58/IFI35/TLR10/PIK3AP1/PELI1/SQSTM1/TNIP1/NFKBIA/LACC1/TNF/TLR7/IFIH1/BTK/RSAD2/TREML4/KLRC1/OASL/OAS1/LYN/FYN/TNFAIP3/SLC15A3/NLRC4/TLR9…	activation of innate immune response	271	-0.227008	-0.98998	0.492424	0.868418	0.808967	2938	tags=17%, list=14%, signal=15%	NR1H4/HSPA1B/TICAM1/PRKD1/MAP3K7/GBP5/LRRC14/RNF125/GBP2/LSM14A/TRIM25/OAS1/SQSTM1/NAGLU/MAPKAPK3/TRAF6/IKBKB/OAS3/EIF2AK2/NLRP6/TRIM32/CREBBP/IRAK2/MIR17/CARD8/SEC14L1/TLR8/LYN/EP300/ATAT1/PLCG2/LILRA4/CD300LF/SLC15A3/NFKBIZ/CD274/CD36/RNF170/ZNRF1/NINJ1/ZBP1/NFKBIA/S100A14/ALPK1/BIRC3/TNIP1	activation of innate immune response	254	0.175045	0.80704	0.964286	1	1	3248	tags=20%, list=18%, signal=16%	COLEC11/TREM2/TNIP3/F2RL1/GFI1/OAS3/TNFAIP3/CD300A/HSPA1B/TLR4/NLRC3/OAS1/GBP5/OASL/LILRA4/IRF7/DHX58/ALPK1/SARM1/NOP53/PTPN22/TRAF3/IRF4/LY96/PRKCE/RFTN1/MAPKAPK3/BTK/BIRC3/TSPAN6/PYHIN1/TIFA/DDX60/NAIP/TLR5/CTSS/IRAK3/PELI1/PRKD1/ZBP1/TRAF3IP3/TNIP2/CGAS/CASP1/TRIM5/APPL2/UNC93B1/CYBA/KLRC4/TIRAP	0.200328	0.964286	p3_0.200328407224959	p0_0.964285714285714
GO:0002220	innate immune response activating cell surface receptor signaling pathway	79	-0.457272	-1.49762	0.0160769	0.162653	0.143734	3718	tags=37%, list=18%, signal=30%	IRAK2/NAGLU/TAX1BP1/NINJ1/F2RL1/TRAF3/TYROBP/RIPK2/KLRK1/LY96/SYK/TREM2/COLEC10/IFI35/PIK3AP1/PELI1/SQSTM1/NFKBIA/KLRC1/OAS1/LYN/FYN/TNFAIP3/COLEC11/KLRD1/LTF/TLR4/CD14/NOD2	innate immune response activating cell surface receptor signaling pathway	89	-0.266601	-0.99618	0.466825	0.853679	0.795238	2059	tags=17%, list=10%, signal=15%	OAS1/SQSTM1/NAGLU/TRAF6/IKBKB/TRIM32/CREBBP/IRAK2/LYN/EP300/PLCG2/ZNRF1/NINJ1/NFKBIA/S100A14	innate immune response activating cell surface receptor signaling pathway	83	-0.196332	-0.573084	0.988304	1	1	2439	tags=12%, list=13%, signal=10%	TICAM2/MFHAS1/CLEC7A/NR1D1/SYK/LTF/S100A14/BPIFB1/FCN1/FCN3	0.0160769	0.988304	p3_0.0160768977463403	p0_0.988304093567251
GO:0002221	pattern recognition receptor signaling pathway	214	-0.298654	-1.11535	0.207578	0.547931	0.484198	5166	tags=31%, list=26%, signal=24%	NLRP1/NEK7/ALPK1/OAS3/GBP2/RIOK3/TSPAN6/HSPA1A/MARK4/DAB2IP/NFKBIL1/SARM1/TRIM11/SLC15A4/IRAK2/TLR3/NAGLU/GPR108/TAX1BP1/HSPA1B/NINJ1/F2RL1/TRAF3/SLC15A2/NR1H4/CTSS/RIPK2/TIFA/UNC93B1/LY96/BIRC3/TREM2/IRF1/COLEC10/DDX60/DHX58/IFI35/TLR10/PIK3AP1/PELI1/SQSTM1/TNIP1/NFKBIA/LACC1/TNF/TLR7/IFIH1/BTK/RSAD2/TREML4/OASL/OAS1/LYN/TNFAIP3/SLC15A3/NLRC4/TLR9/IRF7/COLEC11/LTF/GBP5/NFKBIZ/TLR4/NLRP3/CD14/SMP…	pattern recognition receptor signaling pathway	235	-0.235943	-1.02121	0.414044	0.834306	0.777191	2938	tags=18%, list=14%, signal=16%	NR1H4/HSPA1B/TICAM1/PRKD1/MAP3K7/GBP5/LRRC14/RNF125/GBP2/LSM14A/TRIM25/OAS1/SQSTM1/NAGLU/MAPKAPK3/TRAF6/IKBKB/OAS3/EIF2AK2/NLRP6/TRIM32/IRAK2/MIR17/CARD8/SEC14L1/TLR8/LYN/ATAT1/PLCG2/LILRA4/CD300LF/SLC15A3/NFKBIZ/CD274/CD36/RNF170/ZNRF1/NINJ1/NFKBIA/S100A14/ALPK1/BIRC3/TNIP1	pattern recognition receptor signaling pathway	223	0.190006	0.879082	0.8125	1	1	3160	tags=20%, list=17%, signal=17%	COLEC11/TREM2/TNIP3/F2RL1/GFI1/OAS3/TNFAIP3/CD300A/HSPA1B/TLR4/NLRC3/OAS1/GBP5/OASL/LILRA4/IRF7/DHX58/ALPK1/SARM1/NOP53/PTPN22/TRAF3/IRF4/LY96/PRKCE/RFTN1/MAPKAPK3/BTK/BIRC3/TSPAN6/TIFA/DDX60/NAIP/TLR5/CTSS/IRAK3/PELI1/PRKD1/TRAF3IP3/TNIP2/CGAS/CASP1/APPL2/UNC93B1/CYBA	0.207578	0.8125	p3_0.207578253706755	p0_0.8125
GO:0002223	stimulatory C-type lectin receptor signaling pathway	19	-0.565752	-1.43512	0.0804598	0.366382	0.323766	3555	tags=37%, list=18%, signal=30%	TYROBP/KLRK1/SYK/KLRC1/LYN/FYN/KLRD1	stimulatory C-type lectin receptor signaling pathway	21	-0.616244	-1.73224	0.0034324	0.0941546	0.0877089	2791	tags=33%, list=13%, signal=29%	MAP3K7/TRAF6/IKBKB/CREBBP/LYN/EP300/PLCG2	stimulatory C-type lectin receptor signaling pathway	18	-0.269443	-0.627994	0.888268	1	1	5881	tags=39%, list=32%, signal=26%	TRAF6/PAK3/KLRC1/KLRD1/PAK1/CLEC7A/SYK	0.0034324	0.888268	p1_0.00343240285346443	p0_0.888268156424581
GO:0002224	toll-like receptor signaling pathway	63	-0.333225	-1.05509	0.345745	0.673101	0.594809	4714	tags=32%, list=23%, signal=24%	NFKBIL1/SARM1/IRAK2/TLR3/GPR108/TRAF3/CTSS/UNC93B1/LY96/BIRC3/IRF1/TLR10/TNIP1/TLR7/BTK/TLR9/IRF7/NFKBIZ/TLR4/SMPDL3B	toll-like receptor signaling pathway	71	-0.324256	-1.15169	0.209906	0.703724	0.655549	1897	tags=24%, list=9%, signal=22%	TICAM1/MAP3K7/LRRC14/MAPKAPK3/TRAF6/IKBKB/NLRP6/IRAK2/MIR17/TLR8/PLCG2/CD300LF/NFKBIZ/CD274/CD36/BIRC3/TNIP1	toll-like receptor signaling pathway	64	0.239466	0.902214	0.664706	1	1	3635	tags=31%, list=20%, signal=25%	TNIP3/GFI1/CD300A/TLR4/IRF7/SARM1/TRAF3/IRF4/LY96/PRKCE/MAPKAPK3/BTK/BIRC3/TLR5/CTSS/IRAK3/UNC93B1/TIRAP/GPR108/TLR6	0.209906	0.664706	p1_0.209905660377358	p0_0.664705882352941
GO:0002227	innate immune response in mucosa	7	-0.745765	-1.48233	0.0536082	0.31496	0.278325	2584	tags=57%, list=13%, signal=50%	RPL39/PLA2G1B/LTF/NOD2	innate immune response in mucosa	15	-0.427349	-1.09697	0.343348	0.803009	0.748036	560	tags=20%, list=3%, signal=19%	DEFA4/DEFA5/DEFB1	innate immune response in mucosa	10	-0.748134	-1.55074	0.058104	1	1	2004	tags=60%, list=11%, signal=53%	NOD2/DEFA3/RNASE2/PLA2G1B/LTF/BPIFB1	0.0536082	0.343348	p3_0.0536082474226804	p1_0.343347639484979
GO:0002228	natural killer cell mediated immunity	61	-0.331119	-1.04793	0.358289	0.684837	0.60518	2413	tags=26%, list=12%, signal=23%	HLA-B/PVR/ULBP2/CEBPG/LGALS9/UNC13D/KLRC1/ULBP1/NCR3/KLRD1/VAV1/HLA-F/IL18RAP/RASGRP1/SLAMF7/CEACAM1	natural killer cell mediated immunity	74	0.410636	1.46847	0.0127257	0.193934	0.180657	3923	tags=28%, list=19%, signal=23%	SERPINB9/TGFB1/TUBB/RNF19B/ULBP2/NCR3/RAB27A/CRTAM/TUBB4B/CD160/IL18RAP/CD226/SLAMF6/PRDX1/IL12A/RAET1E/HAVCR2/KLRF2/NCR1/CORO1A/SH2D1A	natural killer cell mediated immunity	63	0.36824	1.387	0.049157	1	1	3602	tags=38%, list=20%, signal=31%	RAET1E/PTPN6/CD226/SLAMF6/LGALS9/ULBP2/CD2/TGFB1/CD96/KLRB1/LILRB1/NECTIN2/CRTAM/CORO1A/CEACAM1/SERPINB9/FCGR3A/LAG3/KLRC4/HLA-A/HLA-B/CRK/HLA-E/PIK3R6	0.0127257	0.358289	p1_0.0127257364446206	p3_0.358288770053476
GO:0002230	positive regulation of defense response to virus by host	23	-0.354437	-0.942637	0.51711	0.788241	0.696556	2379	tags=17%, list=12%, signal=15%	STAT1/ZDHHC11/ZC3H12A/IL23A	positive regulation of defense response to virus by host	25	-0.359569	-1.04288	0.379691	0.812864	0.757217	3866	tags=32%, list=18%, signal=26%	ZC3H12A/ZDHHC11/SIN3A/APOBEC3G/EIF2AK4/STAT1/PARP9/IL12RB1	positive regulation of defense response to virus by host	27	0.28985	0.886119	0.635688	1	1	5776	tags=44%, list=32%, signal=30%	TRIM22/LILRB1/DTX3L/IL23A/TRAF3IP2/CGAS/IL23R/ZDHHC11/SELENOK/APOBEC3G/TOMM70/PYCARD	0.379691	0.635688	p1_0.379690949227373	p0_0.635687732342007
GO:0002237	response to molecule of bacterial origin	311	-0.437097	-1.69613	5.15585e-06	0.000377793	0.00033385	2686	tags=26%, list=13%, signal=23%	BPI/NOCT/ADAMTS13/DIO2/PF4/XBP1/ADAM17/TLR10/PELI1/NFKB2/SCARB1/MGST2/TNIP1/CSF2/C5AR1/NFKBIA/ARID5A/TNF/PTGIR/PLSCR4/BTK/CARD9/LGALS9/CD40/CD80/IL36A/LTA/ABCA1/VCAM1/CMPK2/ABCC8/CNR2/LYN/SERPINE1/TNFAIP3/NR4A1/PCK2/BDKRB1/TLR9/PPM1E/ZC3H12A/CCR7/SLC7A5/PF4V1/IL13/IRF5/LTF/GBP5/CSF2RB/NFKBIZ/CXCL10/AICDA/TLR4/CYP1A1/SOD2/NLRP3/GCH1/CXCL5/CD14/CLDN1/CX3CL1/IL36B/EDN1/NOD2/ANKRD1/IL36RN/SELE/PTGS2/…	response to molecule of bacterial origin	342	-0.213831	-0.9623	0.578554	0.907327	0.845213	2940	tags=15%, list=14%, signal=13%	SLPI/NR1H4/PCK2/PPBP/TICAM1/CX3CL1/WNT5A/GBP5/MIF/GATA1/ASS1/AXL/GBP2/CARD9/FZD5/S100A7/NAGLU/CARD16/MAPKAPK3/TRAF6/CX3CR1/LILRB2/CEBPB/FCGR2B/PTGER1/BMP6/IRAK2/MIR17/SLC7A5/CARD8/CEBPE/LYN/ABCC8/CXCL13/HDAC5/SCARB1/ALPL/PLCG2/NFKBIZ/CLDN1/CD274/ADAM9/CD36/DEFA5/SOD2/MEF2C/CD24/EDN1/NFKBIA/CDK19/S100A14/TNIP1/ADM	response to molecule of bacterial origin	291	-0.222921	-0.711605	0.954035	1	1	4735	tags=27%, list=26%, signal=20%	ABL1/PRDX3/HAVCR2/MAP2K7/NFKBIB/TNFSF4/ADAMTS13/JAK2/TLR1/IL1A/CPS1/SRR/AHR/MYD88/NFKB2/SIGIRR/MRC1/ZC3H12A/AKAP12/CXCL2/KCNJ8/CD36/BPI/FGFR2/CD80/GBP2/ADM/CXCL6/NOD2/MPO/PF4/LBP/NUGGC/IL10/TNFRSF11A/CASP9/IRAK2/LILRB2/SOD2/CD24/CITED1/TICAM2/PTGS2/SNCA/HPGD/CXCL5/PPBP/ARID5A/CSF2RB/CXCL1/DEFA3/BDKRB1/PTGER1/SLC7A5/CX3CR1/NR4A1/NR1D1/ALPL/FZD5/WNT5A/LTF/ELANE/S100A14/CCL2/SPON2/TRIB1/CTSG/NOCT/FG…	5.15585e-06	0.954035	p3_5.15585228150016e-06	p0_0.954034729315628
GO:0002244	hematopoietic progenitor cell differentiation	122	-0.294985	-1.03445	0.378709	0.700776	0.619265	4550	tags=28%, list=23%, signal=22%	HSPA9/MLF1/NFE2L2/LMBR1L/TGFB1/BATF/EXT1/TMEM91/FSTL3/INHBA/PTPRZ1/BMP4/PLD4/TCF15/SHH/TP53/FOXC1/CEBPD/HERC6/TMEM190/FST/FLT3/LYN/OSM/PLEK/HES1/TAL1/PTPRC/SLC8A3/KDR/MIXL1/MEOX1/GATA3/DACT2	hematopoietic progenitor cell differentiation	129	0.268422	1.04582	0.373288	0.810826	0.755318	6582	tags=43%, list=31%, signal=29%	FSTL3/SIPA1L3/NOTCH1/ARMC6/ESCO2/TGFB1/MYB/MEOX1/LMBR1L/ITCH/METTL3/KDR/RBM47/ERCC2/TREX1/UFL1/HES5/RRS1/MIXL1/HYAL2/SH2B3/SOS1/HES1/TAL1/MLF1/ANLN/FNIP1/YTHDF2/SSBP3/HSPA9/CDK6/PCID2/PLEK/SBDS/NUDT21/GATA3/TIFAB/AGPAT5/TMEM91/TOP2A/HOXB4/PTPRC/ZNHIT1/PDGFRA/TCF15/XRCC5/HEATR9/BATF/REST/JAM3/LIPA/WDR38/SLC8A3/FLCN/NFE2L2	hematopoietic progenitor cell differentiation	114	0.207687	0.876113	0.809091	1	1	1088	tags=10%, list=6%, signal=9%	ESCO2/BATF/PTPN6/PLD4/GATA3/BCL2/SMPD3/AGPAT5/HERC6/TGFB1/CITED2	0.373288	0.809091	p1_0.373287671232877	p0_0.809090909090909
GO:0002251	organ or tissue specific immune response	16	-0.606761	-1.45721	0.0719844	0.349259	0.308635	2584	tags=31%, list=13%, signal=27%	PLA2G1B/FFAR3/LTF/NOD2/IL6	organ or tissue specific immune response	30	0.373904	1.09873	0.301852	0.776534	0.723374	2605	tags=29%, list=12%, signal=25%	IFNLR1/FFAR2/IFNL2/IL6R/GP2/TREX1/CD160/NOS2/FFAR3	organ or tissue specific immune response	19	-0.644743	-1.50677	0.0802817	1	1	2004	tags=47%, list=11%, signal=42%	RAB17/NOD2/DEFA3/RNASE2/PLA2G1B/LTF/BPIFB1/PIGR/IL6	0.0719844	0.301852	p3_0.0719844357976654	p1_0.301851851851852
GO:0002260	lymphocyte homeostasis	69	0.325726	1.08685	0.296629	0.633373	0.559702	2412	tags=17%, list=12%, signal=15%	CCNB2/RIPK3/CD74/IL7R/SLC46A2/P2RX7/RAG1/DOCK10/MIR17HG/CORO1A/AIM2/SLC40A1	lymphocyte homeostasis	73	0.323055	1.14894	0.202091	0.697535	0.649783	3174	tags=24%, list=15%, signal=20%	LMO1/AIM2/MIR17HG/RIPK3/BAK1/SIT1/SPNS2/CASP3/BCL2L11/CCNB2/SLC39A3/GPAM/SKIL/RAG1/SLC46A2/TNFSF13B/SOS1/CD74	lymphocyte homeostasis	66	0.38678	1.46666	0.0376585	0.987127	0.987127	2960	tags=32%, list=16%, signal=27%	SIT1/IL7R/BCL2L11/TNFAIP3/BCL2/LGALS9/TSC22D3/JAK3/CD74/PMAIP1/DNAJA3/BAX/CORO1A/WDR37/CHST3/GPR174/P2RX7/BAK1/PACS1/TRAF3IP2/LAT	0.0376585	0.296629	p0_0.0376584886219059	p3_0.296629213483146
GO:0002262	myeloid cell homeostasis	165	-0.319917	-1.16183	0.141414	0.463503	0.409591	4997	tags=33%, list=25%, signal=25%	JMJD6/CHMP5/HSPA1A/ZNF16/TMEM14C/BCL6/LIPA/SLC25A38/ETV2/HSPA9/ACVR2A/RPS19/SLC15A4/L3MBTL3/RPS14/HSPA1B/INHBA/ID2/IKZF1/P4HTM/EPAS1/FOXP3/BMP4/NCSTN/CCR2/GATA1/SLC4A1/SLC11A2/CSF1/PIK3CD/INHA/GCNT4/STAT1/ADAM17/PLA2G10/CEBPG/DMTN/KLF1/BTK/ZFPM1/SLC1A5/DNASE2/LYN/ADGRF5/TAL1/INPP5D/SLC7A11/MB/ISG15/VEGFA/KCNQ1/ALAS2/HCLS1/GATA3/IL6	myeloid cell homeostasis	168	0.307306	1.23114	0.0690909	0.51377	0.478598	3671	tags=25%, list=17%, signal=21%	ACVR2A/RAC2/FANCC/ANXA1/MYB/DYRK3/PLA2G10/BAK1/SLC25A40/PRMT1/JMJD6/KLF1/CASP3/HCLS1/MTHFD1/ITPKB/ERCC2/BCL2L11/KLF13/CFLAR/SLC1A5/LYAR/HAMP/UFL1/TSPO2/ARNT/MAFB/HMGB1/SLC15A4/SMAD5/DIAPH3/SH2B3/RB1/CCR2/PRDX1/STAT3/KLF2/TAL1/RACGAP1/MAPK14/INPP5D/MFHAS1/NCAPG2	myeloid cell homeostasis	160	0.168537	0.732795	1	1	1	5447	tags=31%, list=30%, signal=22%	ADGRF5/IKZF1/MB/BCL2L11/GATA3/HSPA1B/CCR2/CITED2/NEMP1/DIAPH3/HDAC6/BAX/HOXB6/BTK/BMP4/L3MBTL3/BAK1/HIPK2/B2M/TRAF3IP2/DYRK3/CSF1/SH2B3/LYN/ATP5IF1/ZBTB7A/CXCR2/P4HTM/DMTN/MAFB/XKR8/BCL6/RB1/PIK3CD/PTBP3/RHEX/LIPA/ISG15/GPI/ACVR1B/MAPK14/DNASE2/HOXA5/FAM210B/NCSTN/KCNQ1/HMGB2/SLC15A4/MERTK/TMEM14C	0.0690909	1	p1_0.0690909090909091	p0_1
GO:0002263	cell activation involved in immune response	250	-0.342579	-1.30867	0.0285784	0.225784	0.199522	4031	tags=33%, list=20%, signal=27%	CD46/SNAP23/CX3CR1/LAMP1/SMAD7/PRKCZ/PLA2G3/PTK2B/ENTPD7/F2RL1/FCER1G/TNFSF4/ITGAL/TYROBP/RIPK2/IL27RA/APP/RORA/FOXP3/ADORA2B/CCR2/CPLX2/GATA1/SYK/TREM2/GAB2/PRAM1/GRN/PIK3CD/IFI35/XBP1/TP53/DYSF/MDK/ST3GAL1/TNF/EOMES/LOXL3/BTK/PTGDR/CR1/LGALS9/CD80/STXBP2/ZFPM1/SPN/UNC13D/LYN/RAB44/ASCL2/IL33/CD28/STAT4/LFNG/ANXA3/PTGDS/RELB/CD19/IFNB1/PTPRC/TNFSF18/ZC3H12A/ITGB2/HLA-F/CCL19/FGR/IL13/CD244/RORC/…	cell activation involved in immune response	285	0.271182	1.15376	0.113712	0.595922	0.555126	3917	tags=22%, list=19%, signal=18%	HLX/RAC2/IL33/SEMA4A/LY9/SUCNR1/ZBTB7B/SLC18A2/STXBP2/IL27RA/ANXA1/RAG2/TGFB1/MYD88/MYB/CCL19/MILR1/FES/ASCL2/SNAP23/IL6R/APBB1IP/F2RL1/NDFIP1/CD1C/RAB27A/PLA2G3/TREX1/PIK3CG/STAT6/TNFSF4/CLCF1/LOXL3/CD81/ITM2A/MLH1/HSPD1/NKX2-3/PTGDS/HMGB1/SLC15A4/DLL1/ITFG2/MEN1/MSH2/SLAMF6/PARP3/CCR2/CD74/STAT3/SOCS3/IFNA21/CLEC4E/PLCL2/TBX21/PTAFR/CD28/HAVCR2/KLRF2/RNF168/IFNA16/IFNG/RAB44/CORO1A	cell activation involved in immune response	254	0.309855	1.42858	0.000584022	0.115609	0.115609	3707	tags=29%, list=20%, signal=24%	MILR1/FCER1A/TREM2/MDK/F2RL1/BATF/SLAMF1/PTPN6/IL27RA/SLAMF6/GATA3/CD300A/CD28/FGL2/LOXL3/LGALS9/TLR4/CCR2/HLA-DRA/CD40LG/TGFB1/CLEC4D/KMT5C/IFNG/PRKCZ/IRF8/FCGR2B/DNASE1L3/IL13RA2/JAK3/NSD2/FGR/CR1/CD74/CD180/LILRB1/IL18R1/MSH2/MEN1/IRF4/HLA-DRB1/NFKBID/CORO1A/PMS2/ZNF683/CEACAM1/STAT4/LEF1/PRKCE/ANXA3/BTK/ADGRE2/FCGR3A/SMAD7/PTK2B/IL23A/SHLD3/IL6R/LAT/PARP3/ST3GAL1/PLCL2/BCR/RARA/SHLD1/SOCS5/PA…	0.000584022	0.113712	p0_0.000584022419689298	p1_0.11371237458194
GO:0002269	leukocyte activation involved in inflammatory response	43	-0.622907	-1.83017	0.00117651	0.0318225	0.028121	4379	tags=53%, list=22%, signal=42%	TTBK1/SPHK1/TLR3/NAGLU/CX3CR1/SYT11/LDLR/TYROBP/APP/AIF1/TREM2/GRN/IFNGR1/C5AR1/TNF/IL33/TLR9/PTPRC/ITGB2/AZU1/IL13/CX3CL1/IL6	leukocyte activation involved in inflammatory response	47	0.359008	1.17007	0.214552	0.706881	0.658488	521	tags=8%, list=2%, signal=8%	CTSC/IL33/SPHK1/MYD88	leukocyte activation involved in inflammatory response	43	-0.34293	-0.915253	0.564661	1	1	4698	tags=33%, list=26%, signal=24%	ITGAM/JAK2/MYD88/KCNJ8/SCNN1B/CST7/IL33/SNCA/CX3CR1/NR1D1/MAPT/AGER/LDLR/IL6	0.00117651	0.564661	p3_0.00117650837896862	p0_0.564660691421255
GO:0002274	myeloid leukocyte activation	207	-0.422763	-1.56925	0.000514885	0.0167943	0.0148409	4269	tags=40%, list=21%, signal=32%	SPHK1/TLR3/MIF/BATF/NAGLU/TSLP/IL4R/WNK4/SNAP23/GPR137B/CX3CR1/PLA2G3/SYT11/LDLR/F2RL1/FCER1G/TYROBP/PLSCR1/APP/RORA/TMEM229B/ADORA2B/AIF1/CCR2/CPLX2/EDN2/GATA1/SYK/TREM2/GAB2/PRAM1/BPI/GRN/CSF1/PIK3CD/IFI35/THBS1/BATF2/NDRG1/PLA2G10/IFNGR1/CSF2/C5AR1/DYSF/CD33/TNF/BTK/PTGDR/LGALS9/LCP2/STXBP2/UNC13D/UBD/CNR2/LYN/RAB44/SPACA3/IL33/ADGRF5/CD200/ANXA3/PTGDS/RELB/TLR9/PTPRC/ZC3H12A/ITGB2/AZU1/FGR/IL…	myeloid leukocyte activation	227	0.265984	1.10844	0.196639	0.690518	0.643246	4024	tags=21%, list=19%, signal=17%	CTSC/TLR1/RAC2/IL33/SPHK1/WNK4/SUCNR1/SLC18A2/STXBP2/ANXA1/MYD88/IL1RL1/MILR1/PLA2G10/FES/SNAP23/F2RL1/JMJD6/LRFN5/DHRS2/TNIP2/TSPAN32/IL31RA/PLA2G3/TREX1/LCP2/PIK3CG/HAMP/HSPD1/IL18RAP/PTGDS/HMGB1/CD200/CD226/HYAL2/CCR2/CD74/SHPK/CD93/NDRG1/MFHAS1/PTAFR/HAVCR2/IFNG/PLA2G4A/RAB44/MT1G/CXCR2/LILRA2	myeloid leukocyte activation	204	-0.236053	-0.742816	0.899054	1	1	2374	tags=13%, list=13%, signal=11%	CD177/MFHAS1/SNCA/BATF3/IL18/NR4A3/IL1RL1/KIT/PLA2G10/LRFN5/CX3CR1/NR1D1/SYK/WNT5A/MAPT/FOXF1/CTSG/GATA2/AGER/DYSF/ITGB6/CNR1/LDLR/IL6/S100A12/PLA2G2A	0.000514885	0.899054	p3_0.000514885023019335	p0_0.899053627760252
GO:0002275	myeloid cell activation involved in immune response	87	-0.457087	-1.52058	0.0113758	0.13719	0.121233	4117	tags=41%, list=20%, signal=33%	IL4R/SNAP23/CX3CR1/PLA2G3/F2RL1/FCER1G/TYROBP/ADORA2B/CCR2/CPLX2/GATA1/SYK/TREM2/GAB2/PRAM1/GRN/PIK3CD/IFI35/DYSF/TNF/BTK/PTGDR/LGALS9/STXBP2/UNC13D/LYN/RAB44/IL33/ANXA3/PTGDS/ITGB2/FGR/IL13/RASGRP1/GRP/SUCNR1	myeloid cell activation involved in immune response	93	0.31853	1.17971	0.162349	0.667174	0.621501	1989	tags=14%, list=9%, signal=13%	RAC2/IL33/SUCNR1/SLC18A2/STXBP2/MYD88/MILR1/FES/SNAP23/F2RL1/PLA2G3/TREX1/PIK3CG	myeloid cell activation involved in immune response	83	0.311303	1.24079	0.0951583	1	1	1497	tags=16%, list=8%, signal=14%	MILR1/FCER1A/TREM2/F2RL1/SLAMF1/PTPN6/CD300A/LGALS9/CCR2/IFNG/DNASE1L3/IL13RA2/FGR	0.0113758	0.162349	p3_0.0113758300537749	p1_0.162348877374784
GO:0002279	mast cell activation involved in immune response	50	-0.471663	-1.43686	0.0429952	0.292778	0.258723	4117	tags=42%, list=20%, signal=34%	IL4R/SNAP23/PLA2G3/ADORA2B/CPLX2/GATA1/SYK/GAB2/PIK3CD/BTK/PTGDR/LGALS9/STXBP2/UNC13D/LYN/RAB44/PTGDS/FGR/IL13/RASGRP1/GRP	mast cell activation involved in immune response	52	0.347566	1.15772	0.210238	0.703724	0.655549	1989	tags=15%, list=9%, signal=14%	RAC2/SLC18A2/STXBP2/MILR1/FES/SNAP23/PLA2G3/PIK3CG	mast cell activation involved in immune response	43	0.316259	1.09582	0.307692	1	1	1497	tags=16%, list=8%, signal=15%	MILR1/FCER1A/PTPN6/CD300A/LGALS9/IL13RA2/FGR	0.0429952	0.307692	p3_0.0429951927572382	p0_0.307692307692308
GO:0002281	macrophage activation involved in immune response	18	-0.502504	-1.25981	0.173333	0.508754	0.449578	3996	tags=56%, list=20%, signal=45%	CX3CR1/TYROBP/SYK/TREM2/GRN/IFI35/DYSF/TNF/IL33/SUCNR1	macrophage activation involved in immune response	19	0.3634	0.967982	0.493433	0.868893	0.80941	1782	tags=16%, list=8%, signal=14%	IL33/SUCNR1/TREX1	macrophage activation involved in immune response	18	-0.323191	-0.753267	0.772346	1	1	3389	tags=28%, list=19%, signal=23%	LBP/IL33/CX3CR1/SYK/DYSF	0.173333	0.772346	p3_0.173333333333333	p0_0.772346368715084
GO:0002283	neutrophil activation involved in immune response	17	-0.615006	-1.51483	0.0498084	0.310951	0.274783	3659	tags=41%, list=18%, signal=34%	FCER1G/TYROBP/SYK/PRAM1/STXBP2/ANXA3/ITGB2	neutrophil activation involved in immune response	19	0.400391	1.06652	0.373358	0.810826	0.755318	521	tags=11%, list=2%, signal=10%	STXBP2/MYD88	neutrophil activation involved in immune response	19	-0.266516	-0.62285	0.908451	1	1	4698	tags=37%, list=26%, signal=27%	LILRA2/ITGAM/MYD88/STXBP2/SCNN1B/CD177/SYK	0.0498084	0.908451	p3_0.0498084291187739	p0_0.908450704225352
GO:0002285	lymphocyte activation involved in immune response	167	-0.316947	-1.15194	0.151771	0.479735	0.423934	2034	tags=20%, list=10%, signal=18%	MDK/ST3GAL1/EOMES/LOXL3/CR1/LGALS9/CD80/ZFPM1/SPN/UNC13D/ASCL2/CD28/STAT4/LFNG/RELB/CD19/IFNB1/PTPRC/TNFSF18/ZC3H12A/HLA-F/CCL19/CD244/RORC/NFKBIZ/AICDA/TLR4/IL18R1/NLRP3/GATA3/IL23A/ICAM1/CEACAM1/IL6	lymphocyte activation involved in immune response	197	0.262799	1.07922	0.277397	0.760233	0.708188	3917	tags=24%, list=19%, signal=20%	HLX/SEMA4A/LY9/ZBTB7B/IL27RA/ANXA1/RAG2/TGFB1/MYB/CCL19/ASCL2/IL6R/APBB1IP/F2RL1/NDFIP1/CD1C/RAB27A/STAT6/TNFSF4/CLCF1/LOXL3/CD81/ITM2A/MLH1/HSPD1/NKX2-3/HMGB1/SLC15A4/DLL1/ITFG2/MEN1/MSH2/SLAMF6/PARP3/CD74/STAT3/SOCS3/IFNA21/CLEC4E/PLCL2/TBX21/CD28/HAVCR2/KLRF2/RNF168/IFNA16/IFNG/CORO1A	lymphocyte activation involved in immune response	175	0.349493	1.55116	0.000870362	0.152514	0.152514	3707	tags=33%, list=20%, signal=26%	MDK/F2RL1/BATF/IL27RA/SLAMF6/GATA3/CD28/FGL2/LOXL3/LGALS9/TLR4/HLA-DRA/CD40LG/TGFB1/CLEC4D/KMT5C/IFNG/PRKCZ/IRF8/FCGR2B/JAK3/NSD2/CR1/CD74/CD180/LILRB1/IL18R1/MSH2/MEN1/IRF4/HLA-DRB1/NFKBID/CORO1A/PMS2/ZNF683/CEACAM1/STAT4/LEF1/FCGR3A/SMAD7/PTK2B/IL23A/SHLD3/IL6R/PARP3/ST3GAL1/PLCL2/RARA/SHLD1/SOCS5/PAXIP1/UNG/NLRP3/PTPRC/IL23R/CD19/PGLYRP2	0.000870362	0.277397	p0_0.000870361601093679	p1_0.277397260273973
GO:0002286	T cell activation involved in immune response	99	-0.357788	-1.21638	0.117958	0.429925	0.379918	2212	tags=24%, list=11%, signal=22%	TP53/MDK/EOMES/LOXL3/LGALS9/CD80/ZFPM1/SPN/ASCL2/STAT4/RELB/IFNB1/TNFSF18/ZC3H12A/CCL19/RORC/NFKBIZ/IL18R1/NLRP3/GATA3/IL23A/ICAM1/CEACAM1/IL6	T cell activation involved in immune response	118	0.300661	1.15064	0.190559	0.687393	0.640335	3838	tags=24%, list=18%, signal=20%	HLX/SEMA4A/LY9/ZBTB7B/ANXA1/MYB/CCL19/ASCL2/IL6R/APBB1IP/F2RL1/CD1C/RAB27A/STAT6/TNFSF4/LOXL3/CD81/HMGB1/MEN1/SLAMF6/CD74/STAT3/SOCS3/IFNA21/CLEC4E/TBX21/HAVCR2/IFNA16/IFNG	T cell activation involved in immune response	98	0.355043	1.4634	0.0192191	0.747456	0.747456	2710	tags=27%, list=15%, signal=23%	MDK/F2RL1/BATF/SLAMF6/GATA3/FGL2/LOXL3/LGALS9/HLA-DRA/CLEC4D/IFNG/PRKCZ/FCGR2B/JAK3/CD74/LILRB1/IL18R1/MEN1/IRF4/HLA-DRB1/NFKBID/CEACAM1/STAT4/LEF1/SMAD7/IL23A	0.0192191	0.190559	p0_0.0192190612967078	p1_0.190559440559441
GO:0002287	alpha-beta T cell activation involved in immune response	71	-0.378853	-1.21528	0.158273	0.489586	0.43264	1865	tags=25%, list=9%, signal=23%	EOMES/LOXL3/LGALS9/CD80/ZFPM1/SPN/ASCL2/STAT4/RELB/ZC3H12A/CCL19/RORC/NFKBIZ/IL18R1/NLRP3/GATA3/IL23A/IL6	alpha-beta T cell activation involved in immune response	75	0.325257	1.16514	0.189003	0.687393	0.640335	3589	tags=23%, list=17%, signal=19%	HLX/SEMA4A/LY9/ZBTB7B/ANXA1/MYB/CCL19/ASCL2/IL6R/STAT6/TNFSF4/LOXL3/HMGB1/MEN1/SLAMF6/STAT3/SOCS3/TBX21	alpha-beta T cell activation involved in immune response	71	0.321861	1.2508	0.107527	1	1	3609	tags=32%, list=20%, signal=26%	BATF/SLAMF6/GATA3/LOXL3/LGALS9/HLA-DRA/IFNG/PRKCZ/JAK3/IL18R1/MEN1/IRF4/HLA-DRB1/NFKBID/STAT4/LEF1/SMAD7/IL23A/IL6R/RARA/SOCS5/NLRP3/IL23R	0.107527	0.189003	p0_0.107526789940474	p1_0.189003436426117
GO:0002291	T cell activation via T cell receptor contact with antigen bound to MHC molecule on antigen presenting cell	10	0.423801	0.921503	0.580517	0.827095	0.730891	1565	tags=30%, list=8%, signal=28%	HAVCR2/HLA-DMB/APBB1IP	T cell activation via T cell receptor contact with antigen bound to MHC molecule on antigen presenting cell	10	0.460631	1.05015	0.417769	0.83603	0.778797	3673	tags=25%, list=17%, signal=21%	APBB1IP/CD81/HAVCR2	T cell activation via T cell receptor contact with antigen bound to MHC molecule on antigen presenting cell	10	0.460844	1.10921	0.304598	1	1	1765	tags=30%, list=10%, signal=27%	FGL2/LGALS9/LILRB1	0.304598	0.580517	p0_0.304597701149425	p3_0.58051689860835
GO:0002292	T cell differentiation involved in immune response	76	-0.368739	-1.20779	0.163194	0.495806	0.438136	1865	tags=24%, list=9%, signal=22%	EOMES/LOXL3/LGALS9/CD80/ZFPM1/SPN/ASCL2/STAT4/RELB/ZC3H12A/CCL19/RORC/NFKBIZ/IL18R1/NLRP3/GATA3/IL23A/IL6	T cell differentiation involved in immune response	83	0.317685	1.15759	0.194828	0.689643	0.642431	4389	tags=27%, list=21%, signal=21%	HLX/SEMA4A/LY9/ZBTB7B/ANXA1/MYB/CCL19/ASCL2/IL6R/STAT6/TNFSF4/LOXL3/HMGB1/MEN1/SLAMF6/STAT3/SOCS3/CLEC4E/TBX21/IFNG/IFNL1/ENTPD7/TMEM98	T cell differentiation involved in immune response	77	0.334152	1.30179	0.0972446	1	1	3609	tags=32%, list=20%, signal=26%	BATF/SLAMF6/GATA3/FGL2/LOXL3/LGALS9/HLA-DRA/CLEC4D/IFNG/PRKCZ/JAK3/IL18R1/MEN1/IRF4/HLA-DRB1/NFKBID/STAT4/LEF1/SMAD7/IL23A/IL6R/RARA/SOCS5/NLRP3/IL23R	0.0972446	0.194828	p0_0.0972446206108603	p1_0.194827586206897
GO:0002293	alpha-beta T cell differentiation involved in immune response	71	-0.378853	-1.21528	0.158273	0.489586	0.43264	1865	tags=25%, list=9%, signal=23%	EOMES/LOXL3/LGALS9/CD80/ZFPM1/SPN/ASCL2/STAT4/RELB/ZC3H12A/CCL19/RORC/NFKBIZ/IL18R1/NLRP3/GATA3/IL23A/IL6	alpha-beta T cell differentiation involved in immune response	75	0.325257	1.16514	0.189003	0.687393	0.640335	3589	tags=23%, list=17%, signal=19%	HLX/SEMA4A/LY9/ZBTB7B/ANXA1/MYB/CCL19/ASCL2/IL6R/STAT6/TNFSF4/LOXL3/HMGB1/MEN1/SLAMF6/STAT3/SOCS3/TBX21	alpha-beta T cell differentiation involved in immune response	71	0.321861	1.2508	0.107527	1	1	3609	tags=32%, list=20%, signal=26%	BATF/SLAMF6/GATA3/LOXL3/LGALS9/HLA-DRA/IFNG/PRKCZ/JAK3/IL18R1/MEN1/IRF4/HLA-DRB1/NFKBID/STAT4/LEF1/SMAD7/IL23A/IL6R/RARA/SOCS5/NLRP3/IL23R	0.107527	0.189003	p0_0.107526789940474	p1_0.189003436426117
GO:0002294	CD4-positive, alpha-beta T cell differentiation involved in immune response	70	-0.370567	-1.18619	0.190305	0.525844	0.46468	1859	tags=24%, list=9%, signal=22%	LOXL3/LGALS9/CD80/ZFPM1/SPN/ASCL2/STAT4/RELB/ZC3H12A/CCL19/RORC/NFKBIZ/IL18R1/NLRP3/GATA3/IL23A/IL6	CD4-positive, alpha-beta T cell differentiation involved in immune response	74	0.327186	1.17004	0.185567	0.685731	0.638787	3589	tags=24%, list=17%, signal=20%	HLX/SEMA4A/LY9/ZBTB7B/ANXA1/MYB/CCL19/ASCL2/IL6R/STAT6/TNFSF4/LOXL3/HMGB1/MEN1/SLAMF6/STAT3/SOCS3/TBX21	CD4-positive, alpha-beta T cell differentiation involved in immune response	70	0.324855	1.2644	0.140262	1	1	3609	tags=33%, list=20%, signal=26%	BATF/SLAMF6/GATA3/LOXL3/LGALS9/HLA-DRA/IFNG/PRKCZ/JAK3/IL18R1/MEN1/IRF4/HLA-DRB1/NFKBID/STAT4/LEF1/SMAD7/IL23A/IL6R/RARA/SOCS5/NLRP3/IL23R	0.140262	0.190305	p0_0.140262098006485	p3_0.190305206463196
GO:0002295	T-helper cell lineage commitment	20	-0.394801	-1.01773	0.43762	0.740637	0.654489	1859	tags=25%, list=9%, signal=23%	LOXL3/ZFPM1/SPN/IL23A/IL6	T-helper cell lineage commitment	21	0.39649	1.09158	0.342541	0.802949	0.747981	3589	tags=36%, list=17%, signal=30%	LY9/IL6R/STAT6/LOXL3/SLAMF6/STAT3/SOCS3/TBX21	T-helper cell lineage commitment	20	0.320824	0.920817	0.550676	1	1	2941	tags=30%, list=16%, signal=25%	BATF/SLAMF6/LOXL3/IRF4/IL23A/IL6R	0.342541	0.550676	p1_0.342541436464088	p0_0.550675675675676
GO:0002312	B cell activation involved in immune response	72	-0.263956	-0.85223	0.71831	0.895589	0.791418	2023	tags=15%, list=10%, signal=14%	ST3GAL1/CR1/CD28/LFNG/CD19/IFNB1/PTPRC/NFKBIZ/AICDA/TLR4/IL6	B cell activation involved in immune response	79	-0.252867	-0.92106	0.625604	0.916364	0.853631	3201	tags=19%, list=15%, signal=16%	BCL6/SWAP70/TP53BP1/CR1/IL4/BCL3/FCGR2B/CCR6/GPR183/CD19/PLCG2/NFKBIZ/PMS2/TFRC/PTK2B	B cell activation involved in immune response	76	0.329133	1.28856	0.0743116	1	1	3686	tags=32%, list=20%, signal=25%	BATF/IL27RA/CD28/TLR4/CD40LG/TGFB1/KMT5C/IRF8/FCGR2B/NSD2/CR1/CD180/MSH2/PMS2/PTK2B/SHLD3/PARP3/ST3GAL1/PLCL2/SHLD1/PAXIP1/UNG/PTPRC/CD19	0.0743116	0.71831	p0_0.0743116431342009	p3_0.71830985915493
GO:0002313	mature B cell differentiation involved in immune response	24	-0.353589	-0.945696	0.500967	0.780273	0.689515	2443	tags=25%, list=12%, signal=22%	XBP1/ST3GAL1/CR1/LFNG/NFKBIZ/IL6	mature B cell differentiation involved in immune response	31	-0.379584	-1.15911	0.253863	0.747607	0.696427	4330	tags=34%, list=21%, signal=27%	CDH17/IL6/IL6/BCL6/CR1/BCL3/FCGR2B/GPR183/PLCG2/NFKBIZ/PTK2B	mature B cell differentiation involved in immune response	25	-0.229727	-0.565259	0.953297	1	1	263	tags=16%, list=1%, signal=16%	POU2AF1/IL10/ADA/IL6	0.253863	0.953297	p1_0.253863134657837	p0_0.953296703296703
GO:0002320	lymphoid progenitor cell differentiation	23	-0.367936	-0.97854	0.463878	0.757094	0.669033	5263	tags=35%, list=26%, signal=26%	SOX4/NOTCH1/BATF/BMP4/SHH/FLT3/HES1/GATA3	lymphoid progenitor cell differentiation	24	0.456054	1.28723	0.137931	0.639366	0.595596	6966	tags=54%, list=33%, signal=36%	NOTCH1/TREX1/HES5/SOS1/HES1/FNIP1/PCID2/NUDT21/GATA3/ZNHIT1/BATF/FLCN/FLT3	lymphoid progenitor cell differentiation	20	0.478863	1.37441	0.114865	1	1	690	tags=15%, list=4%, signal=14%	BATF/GATA3/BCL2	0.114865	0.463878	p0_0.114864864864865	p3_0.463878326996198
GO:0002323	natural killer cell activation involved in immune response	12	-0.490901	-1.12606	0.323917	0.657484	0.581008	1630	tags=33%, list=8%, signal=31%	UNC13D/IFNB1/HLA-F/CD244	natural killer cell activation involved in immune response	29	-0.167198	-0.508345	0.997849	0.998712	0.930342	5454	tags=41%, list=26%, signal=31%	NKG7/IFNK/PGLYRP1/IFNB1/IFNW1/IFNA2/HLA-F/IFNA10/LAMP1/UNC13D/CD244/IFNE	natural killer cell activation involved in immune response	12	0.231041	0.590136	0.939655	1	1	3707	tags=33%, list=20%, signal=27%	CORO1A/ZNF683/FCGR3A/PGLYRP2	0.323917	0.997849	p3_0.32391713747646	p1_0.997849462365591
GO:0002327	immature B cell differentiation	10	0.3489	0.75864	0.791252	0.925782	0.818099	2024	tags=20%, list=10%, signal=18%	RAG1/KIT	immature B cell differentiation	11	0.363891	0.842479	0.692308	0.934994	0.870986	3625	tags=27%, list=17%, signal=23%	RAG2/RAG1/FNIP1	immature B cell differentiation	10	0.203418	0.489607	0.994253	1	1	6400	tags=70%, list=35%, signal=45%	TRAF3IP2/LRRC8A/IRF2BP2/FNIP1/SYVN1/ATM/PRKDC	0.692308	0.994253	p1_0.692307692307692	p0_0.994252873563218
GO:0002328	pro-B cell differentiation	11	-0.450322	-1.00369	0.457031	0.753153	0.66555	1578	tags=36%, list=8%, signal=34%	SOX4/NOTCH1/FLT3/HES1	pro-B cell differentiation	12	0.591708	1.41166	0.0839552	0.540325	0.503335	4930	tags=50%, list=23%, signal=38%	NOTCH1/HES5/SOS1/HES1/FNIP1/NUDT21	pro-B cell differentiation	11	0.306966	0.764223	0.771588	1	1	12557	tags=100%, list=69%, signal=31%	FLT3/FNIP1/SOS1/SOS2/PRKDC/NUDT21/SOX4/LIG4/NOTCH1/FLCN/HES1	0.0839552	0.771588	p1_0.083955223880597	p0_0.771587743732591
GO:0002335	mature B cell differentiation	30	-0.40735	-1.13732	0.258845	0.603876	0.533636	2443	tags=30%, list=12%, signal=26%	XBP1/ST3GAL1/IL2RG/CR1/SLAMF8/LFNG/CD19/NFKBIZ/IL6	mature B cell differentiation	37	-0.381983	-1.20776	0.184444	0.685731	0.638787	4431	tags=37%, list=21%, signal=29%	IL2RG/CDH17/IL6/IL6/SLAMF8/BCL6/CR1/BCL3/FCGR2B/GPR183/CD19/PLCG2/NFKBIZ/PTK2B	mature B cell differentiation	31	0.2955	0.935497	0.559671	1	1	3128	tags=29%, list=17%, signal=24%	CMTM7/SLAMF8/IRF8/FCGR2B/CR1/IL2RG/PTK2B/ST3GAL1/PLCL2	0.184444	0.559671	p1_0.184444444444444	p0_0.559670781893004
GO:0002347	response to tumor cell	36	0.308358	0.910488	0.630435	0.851509	0.752466	2883	tags=25%, list=14%, signal=21%	CRTAM/HAVCR2/HLA-DRB1/IL12B/HMGB1/SLC22A13/IL12A/CD226/IGFBPL1	response to tumor cell	39	0.440419	1.39432	0.0710383	0.516429	0.481075	3906	tags=33%, list=19%, signal=27%	LAPTM5/NOTCH1/MR1/TGFB1/CRTAM/CD160/HSPD1/HMGB1/CD226/HRG/IL12A/HAVCR2/FBXO38	response to tumor cell	36	0.315164	1.02999	0.377193	1	1	2400	tags=25%, list=13%, signal=22%	CD226/GSDME/TGFB1/TNFRSF10B/NECTIN2/CRTAM/HLA-DRB1/CEACAM1/LAPTM5	0.0710383	0.630435	p1_0.0710382513661202	p3_0.630434782608696
GO:0002357	defense response to tumor cell	12	-0.57633	-1.32202	0.161959	0.495112	0.437523	2053	tags=58%, list=10%, signal=52%	RBMS3/DLEC1/PLK5/ABI3/DAPK1/TNFRSF10B/LAPTM5	defense response to tumor cell	13	0.540254	1.31515	0.129456	0.624904	0.582124	51	tags=8%, list=0%, signal=8%	LAPTM5	defense response to tumor cell	11	-0.272508	-0.571529	0.934681	1	1	4465	tags=27%, list=25%, signal=21%	CASC2/DAPK1/PRF1	0.129456	0.934681	p1_0.129455909943715	p0_0.934681181959565
GO:0002360	T cell lineage commitment	31	-0.311975	-0.87825	0.648799	0.860809	0.760684	2212	tags=23%, list=11%, signal=20%	SHH/TP53/LOXL3/ZFPM1/SPN/IL23A/IL6	T cell lineage commitment	34	0.324985	0.988864	0.475138	0.85597	0.797371	3589	tags=29%, list=17%, signal=24%	LY9/RAG2/CTSL/IL6R/STAT6/LOXL3/SLAMF6/STAT3/SOCS3/TBX21	T cell lineage commitment	29	0.346682	1.08407	0.326996	1	1	2941	tags=28%, list=16%, signal=23%	BATF/SLAMF6/BCL2/LOXL3/IRF4/IL7/IL23A/IL6R	0.326996	0.648799	p0_0.326996197718631	p3_0.648798521256932
GO:0002363	alpha-beta T cell lineage commitment	25	-0.335092	-0.89846	0.601923	0.839428	0.741789	1859	tags=20%, list=9%, signal=18%	LOXL3/ZFPM1/SPN/IL23A/IL6	alpha-beta T cell lineage commitment	26	0.391177	1.12584	0.276753	0.76007	0.708037	3589	tags=33%, list=17%, signal=28%	LY9/CTSL/IL6R/STAT6/LOXL3/SLAMF6/STAT3/SOCS3/TBX21	alpha-beta T cell lineage commitment	24	0.346467	1.04709	0.392086	1	1	2941	tags=29%, list=16%, signal=24%	BATF/SLAMF6/BCL2/LOXL3/IRF4/IL23A/IL6R	0.276753	0.601923	p1_0.276752767527675	p3_0.601923076923077
GO:0002366	leukocyte activation involved in immune response	247	-0.342416	-1.30634	0.0218486	0.194123	0.171544	4031	tags=33%, list=20%, signal=27%	CD46/SNAP23/CX3CR1/LAMP1/SMAD7/PRKCZ/PLA2G3/PTK2B/ENTPD7/F2RL1/FCER1G/TNFSF4/ITGAL/TYROBP/RIPK2/IL27RA/RORA/FOXP3/ADORA2B/CCR2/CPLX2/GATA1/SYK/TREM2/GAB2/PRAM1/GRN/PIK3CD/IFI35/XBP1/TP53/DYSF/MDK/ST3GAL1/TNF/EOMES/LOXL3/BTK/PTGDR/CR1/LGALS9/CD80/STXBP2/ZFPM1/SPN/UNC13D/LYN/RAB44/ASCL2/IL33/CD28/STAT4/LFNG/ANXA3/PTGDS/RELB/CD19/IFNB1/PTPRC/TNFSF18/ZC3H12A/ITGB2/HLA-F/CCL19/FGR/IL13/CD244/RORC/RASG…	leukocyte activation involved in immune response	282	0.27354	1.16155	0.115966	0.599787	0.558727	3917	tags=22%, list=19%, signal=19%	HLX/RAC2/IL33/SEMA4A/LY9/SUCNR1/ZBTB7B/SLC18A2/STXBP2/IL27RA/ANXA1/RAG2/TGFB1/MYD88/MYB/CCL19/MILR1/FES/ASCL2/SNAP23/IL6R/APBB1IP/F2RL1/NDFIP1/CD1C/RAB27A/PLA2G3/TREX1/PIK3CG/STAT6/TNFSF4/CLCF1/LOXL3/CD81/ITM2A/MLH1/HSPD1/NKX2-3/PTGDS/HMGB1/SLC15A4/DLL1/ITFG2/MEN1/MSH2/SLAMF6/PARP3/CCR2/CD74/STAT3/SOCS3/IFNA21/CLEC4E/PLCL2/TBX21/PTAFR/CD28/HAVCR2/KLRF2/RNF168/IFNA16/IFNG/RAB44/CORO1A	leukocyte activation involved in immune response	250	0.315185	1.46896	0.00145271	0.202854	0.202854	3707	tags=30%, list=20%, signal=24%	MILR1/FCER1A/TREM2/MDK/F2RL1/BATF/SLAMF1/PTPN6/IL27RA/SLAMF6/GATA3/CD300A/CD28/FGL2/LOXL3/LGALS9/TLR4/CCR2/HLA-DRA/CD40LG/TGFB1/CLEC4D/KMT5C/IFNG/PRKCZ/IRF8/FCGR2B/DNASE1L3/IL13RA2/JAK3/NSD2/FGR/CR1/CD74/CD180/LILRB1/IL18R1/MSH2/MEN1/IRF4/HLA-DRB1/NFKBID/CORO1A/PMS2/ZNF683/CEACAM1/STAT4/LEF1/PRKCE/ANXA3/BTK/ADGRE2/FCGR3A/SMAD7/PTK2B/IL23A/SHLD3/IL6R/LAT/PARP3/ST3GAL1/PLCL2/BCR/RARA/SHLD1/SOCS5/PA…	0.00145271	0.115966	p0_0.00145270846387942	p1_0.115966386554622
GO:0002367	cytokine production involved in immune response	106	-0.45914	-1.57838	0.00553209	0.0910781	0.0804843	4231	tags=41%, list=21%, signal=32%	TLR3/MIF/TGFB1/HLA-G/HLA-A/LITAF/SMAD7/PRKCZ/F2RL1/TNFSF4/RIPK2/FOXP3/CD55/CCR2/SASH3/SYK/SLAMF9/ARID5A/LACC1/FFAR3/TNF/TLR7/BTK/CARD9/RSAD2/TLR9/LAPTM5/IFNB1/TGFB2/SLC7A5/HLA-F/GPRC5B/IRF5/TLR4/IL18R1/NLRP3/TREM1/BST2/GATA3/APOA1/NOD2/IL6/IL1B	cytokine production involved in immune response	116	0.272576	1.04143	0.385017	0.817169	0.761227	3682	tags=19%, list=18%, signal=16%	LAPTM5/DENND1B/TGFB1/MYD88/FFAR2/DDX21/MAPKAPK2/F2RL1/SCIMP/CD160/SEMA7A/TNFSF4/CD81/FFAR3/NOD1/CD226/SLAMF9/CCR2/CD74/TBX21/GPRC5B/HFE	cytokine production involved in immune response	109	0.267735	1.11215	0.238938	1	1	2922	tags=26%, list=16%, signal=22%	F2RL1/HFE/SLAMF1/SLAMF9/CD226/GATA3/TLR4/CCR2/BST2/CARD9/TGFB1/CD96/PRKCZ/JAK3/ACP5/CD74/LILRB1/IL18R1/IL1R1/TNFRSF14/LAPTM5/LILRB4/BTK/P2RX7/SMAD7/TRAF2/IRAK3/B2M	0.00553209	0.385017	p3_0.00553208619480579	p1_0.385017421602787
GO:0002369	T cell cytokine production	32	-0.651734	-1.83918	0.00345073	0.0680854	0.060166	4082	tags=53%, list=20%, signal=42%	HLA-A/SMAD7/PRKCZ/TNFSF4/FOXP3/CD55/CCR2/SASH3/ARID5A/RSAD2/IFNB1/HLA-F/IL18R1/NLRP3/GATA3/IL6/IL1B	T cell cytokine production	37	0.209667	0.653504	0.95471	0.990488	0.92268	3682	tags=16%, list=18%, signal=13%	DENND1B/TNFSF4/CD81/CCR2/TBX21/HFE	T cell cytokine production	33	0.331586	1.06188	0.327801	1	1	3535	tags=42%, list=20%, signal=34%	HFE/SLAMF1/GATA3/CCR2/PRKCZ/IL18R1/IL1R1/LILRB4/SMAD7/TRAF2/B2M/CD55/HLA-A/NLRP3	0.00345073	0.95471	p3_0.00345072906592753	p1_0.954710144927536
GO:0002371	dendritic cell cytokine production	16	-0.565803	-1.35884	0.114786	0.428276	0.378461	1113	tags=31%, list=6%, signal=30%	SLAMF9/TLR9/TLR4/BST2/NOD2	dendritic cell cytokine production	16	0.308062	0.787053	0.763258	0.957184	0.891657	4105	tags=25%, list=20%, signal=20%	DDX21/SCIMP/SLAMF9/MAVS	dendritic cell cytokine production	16	0.406067	1.10213	0.318182	1	1	1446	tags=25%, list=8%, signal=23%	SLAMF9/TLR4/BST2/JAK3	0.114786	0.763258	p3_0.114785992217899	p1_0.763257575757576
GO:0002377	immunoglobulin production	87	0.288918	0.995149	0.422018	0.730652	0.645666	431	tags=8%, list=2%, signal=8%	CD22/EXO1/POLQ/CD86/ATAD5/RBP4/IL10	immunoglobulin production	95	0.257152	0.954203	0.548951	0.894447	0.833214	5580	tags=33%, list=27%, signal=25%	IL33/IL27RA/TMBIM6/TGFB1/FCRL3/NDFIP1/TREX1/STAT6/TNFSF4/CLCF1/MLH1/HSPD1/SLC15A4/MCM3AP/MSH2/PARP3/RBP4/TBX21/CD28/RNF168/HPX/DNAJB9/IL13RA2/EXOSC3/CTNNBL1/UNG/APLF/IL2/PTPRC/RNF8/PHB2/EXO1	immunoglobulin production	94	0.268966	1.09254	0.25	1	1	3564	tags=29%, list=20%, signal=23%	BATF/IL27RA/CD28/CD40LG/TGFB1/KMT5C/FCGR2B/IL13RA2/NSD2/CR1/MSH2/PMS2/BTK/POLL/TRAF2/SHLD3/TRAF3IP2/PARP3/CGAS/IGKV4-1/SHLD1/TCF3/CYREN/PAXIP1/UNG/HLA-E/PTPRC	0.25	0.548951	p0_0.25	p1_0.548951048951049
GO:0002381	immunoglobulin production involved in immunoglobulin-mediated immune response	47	0.264824	0.833555	0.76824	0.917006	0.810344	1124	tags=9%, list=6%, signal=8%	EXO1/ATAD5/IL10/CCR6	immunoglobulin production involved in immunoglobulin-mediated immune response	50	0.278003	0.919095	0.591652	0.910415	0.848089	5580	tags=42%, list=27%, signal=31%	IL27RA/TGFB1/NDFIP1/STAT6/TNFSF4/CLCF1/MLH1/HSPD1/SLC15A4/MSH2/PARP3/TBX21/CD28/RNF168/EXOSC3/UNG/APLF/IL2/PTPRC/RNF8/EXO1	immunoglobulin production involved in immunoglobulin-mediated immune response	52	0.382803	1.40557	0.0603614	1	1	3564	tags=33%, list=20%, signal=26%	BATF/IL27RA/CD28/CD40LG/TGFB1/KMT5C/NSD2/MSH2/PMS2/BTK/SHLD3/TRAF3IP2/PARP3/SHLD1/PAXIP1/UNG/PTPRC	0.0603614	0.76824	p0_0.0603613979996936	p3_0.768240343347639
GO:0002385	mucosal immune response	13	-0.576633	-1.33747	0.129524	0.447591	0.395529	2584	tags=46%, list=13%, signal=40%	RPL39/RAB17/PLA2G1B/FFAR3/LTF/NOD2	mucosal immune response	26	0.336975	0.969843	0.48524	0.86406	0.804908	2605	tags=27%, list=12%, signal=24%	IFNLR1/FFAR2/IFNL2/GP2/CD160/NOS2/FFAR3	mucosal immune response	17	-0.631933	-1.44927	0.105114	1	1	3728	tags=47%, list=21%, signal=37%	RAB17/NOD2/DEFA3/RNASE2/PLA2G1B/LTF/BPIFB1/PIGR	0.105114	0.48524	p0_0.105113636363636	p1_0.485239852398524
GO:0002396	MHC protein complex assembly	18	0.722129	1.80445	0.00150878	0.0380081	0.0335872	1396	tags=39%, list=7%, signal=36%	HLA-DRA/HLA-DRB5/HLA-DMB/HLA-DRB1/HLA-DOA/HLA-DOB/HLA-DQB1	MHC protein complex assembly	17	-0.171416	-0.458071	0.995789	0.998378	0.93003	17405	tags=29%, list=83%, signal=5%	TAPBP/HLA-DMA/HLA-DPB1/HLA-DQA1/HLA-DOB	MHC protein complex assembly	18	0.709863	1.95364	0.000488032	0.101521	0.101521	3283	tags=61%, list=18%, signal=50%	HLA-DRB5/HLA-DQA1/HLA-DQB1/HLA-DPB1/HLA-DPA1/HLA-DOA/HLA-DRA/HLA-DRB1/HLA-DMA/B2M/HLA-A	0.000488032	0.995789	p0_0.000488031933584447	p1_0.995789473684211
GO:0002399	MHC class II protein complex assembly	13	0.830477	1.91354	0.000454382	0.0153005	0.0135208	1396	tags=54%, list=7%, signal=50%	HLA-DRA/HLA-DRB5/HLA-DMB/HLA-DRB1/HLA-DOA/HLA-DOB/HLA-DQB1	MHC class II protein complex assembly	13	0.208065	0.506497	0.977486	0.993155	0.925165	4073	tags=23%, list=19%, signal=19%	HLA-DQB1/HLA-DPA1/HLA-DOA	MHC class II protein complex assembly	13	0.785514	2.04289	0.000144162	0.04362	0.04362	2922	tags=77%, list=16%, signal=65%	HLA-DRB5/HLA-DQA1/HLA-DQB1/HLA-DPB1/HLA-DPA1/HLA-DOA/HLA-DRA/HLA-DRB1/HLA-DMA/B2M	0.000144162	0.977486	p0_0.000144162319118561	p1_0.977485928705441
GO:0002407	dendritic cell chemotaxis	20	-0.463628	-1.19515	0.241843	0.585611	0.517496	1780	tags=40%, list=9%, signal=37%	SLAMF8/LGALS9/TRPM2/CCL21/CCR7/CCL19/CCL5/CXCR4	dendritic cell chemotaxis	24	0.341403	0.963625	0.520871	0.88198	0.821601	4021	tags=36%, list=19%, signal=29%	CCL19/ARHGEF5/PIK3CG/CCL21/C1QBP/HMGB1/CCR2/IL12A/CXCR2	dendritic cell chemotaxis	22	0.572365	1.69634	0.0124961	0.602771	0.602771	974	tags=36%, list=5%, signal=34%	CXCR4/CCR7/SLAMF1/CCL5/LGALS9/GAS6/CCR2/SLAMF8	0.0124961	0.520871	p0_0.0124961117012854	p1_0.520871143375681
GO:0002418	immune response to tumor cell	20	0.46368	1.20678	0.209979	0.550946	0.486862	2679	tags=40%, list=13%, signal=35%	CRTAM/HAVCR2/HLA-DRB1/IL12B/HMGB1/SLC22A13/IL12A/CD226	immune response to tumor cell	23	0.489931	1.37341	0.0963636	0.560562	0.522187	3906	tags=48%, list=19%, signal=39%	MR1/TGFB1/CRTAM/CD160/HSPD1/HMGB1/CD226/HRG/IL12A/HAVCR2/FBXO38	immune response to tumor cell	22	0.424885	1.25925	0.185315	1	1	2214	tags=32%, list=12%, signal=28%	CD226/GSDME/TGFB1/NECTIN2/CRTAM/HLA-DRB1/CEACAM1	0.0963636	0.209979	p1_0.0963636363636364	p3_0.20997920997921
GO:0002423	natural killer cell mediated immune response to tumor cell	8	0.513658	1.05818	0.412668	0.724682	0.64039	2679	tags=62%, list=13%, signal=54%	CRTAM/HAVCR2/IL12B/IL12A/CD226	natural killer cell mediated immune response to tumor cell	10	0.651328	1.48489	0.0491493	0.430283	0.400827	3673	tags=60%, list=17%, signal=50%	TGFB1/CRTAM/CD160/CD226/IL12A/HAVCR2	natural killer cell mediated immune response to tumor cell	9	0.623314	1.44349	0.0948276	1	1	2214	tags=56%, list=12%, signal=49%	CD226/TGFB1/NECTIN2/CRTAM/CEACAM1	0.0491493	0.412668	p1_0.0491493383742911	p3_0.412667946257198
GO:0002428	antigen processing and presentation of peptide antigen via MHC class Ib	17	-0.440573	-1.08518	0.344828	0.672401	0.59419	4166	tags=59%, list=21%, signal=47%	HLA-G/MICA/MICB/HLA-A/HLA-H/HLA-B/HLA-C/ULBP2/ULBP1/HLA-F	antigen processing and presentation of peptide antigen via MHC class Ib	14	0.418322	1.03202	0.431034	0.842296	0.784634	3682	tags=29%, list=18%, signal=24%	ULBP2/TAP2/RAET1E/HFE	antigen processing and presentation of peptide antigen via MHC class Ib	14	0.653701	1.72465	0.0145489	0.654374	0.654374	4609	tags=79%, list=25%, signal=59%	RAET1E/HFE/ULBP2/B2M/HLA-C/MICB/HLA-A/HLA-B/HLA-E/TAP2/MICA	0.0145489	0.431034	p0_0.0145489323648575	p1_0.431034482758621
GO:0002429	immune response-activating cell surface receptor signaling pathway	259	-0.390459	-1.49612	0.00100773	0.0289475	0.0255805	4327	tags=32%, list=21%, signal=26%	PRKCH/SLC39A6/RBCK1/NAGLU/MICB/NFKB1/HLA-A/TAX1BP1/TXK/PTPRJ/THEMIS/BTN3A1/NINJ1/F2RL1/BTN3A3/TRAF3/FCER1G/TYROBP/RIPK2/PLSCR1/KLRK1/FOXP3/LY96/KLHL6/MNDA/SYK/TREM2/UBASH3A/PRAM1/COLEC10/CARD11/SH2B2/PIK3CD/BTN1A1/IFI35/CBLB/THEMIS2/PIK3AP1/PELI1/SQSTM1/C3AR1/CD79A/C5AR1/NFKBIA/PAWR/BTK/CR1/LCP2/PRNP/PDE4D/GPLD1/KLRC1/OAS1/LYN/FYN/TNFAIP3/BTNL9/CD28/VTCN1/LAPTM5/COLEC11/CD19/NCR3/PTPRC/KLRD1/ZC3H…	immune response-activating cell surface receptor signaling pathway	289	0.25382	1.07978	0.226891	0.718089	0.668929	2903	tags=15%, list=14%, signal=13%	CMKLR1/TLR1/LAPTM5/BTN1A1/BMX/PTPN22/KCNN4/CD8B/DENND1B/PRNP/THY1/MYD88/EIF2B2/FFAR2/EIF2B1/FCRL3/CARD11/F2RL1/HHLA2/LPXN/LY96/NCR3/FCN2/LIMK1/SCIMP/TNIP2/ELF1/TLR5/KIR2DS2/CD160/LCP2/CD276/IKBKG/CMTM3/CD81/RAB7B/PRKCH/VTCN1/CD3E/GPR32/TIRAP/CD226/PRKD2/EIF2B3	immune response-activating cell surface receptor signaling pathway	286	0.333459	1.57515	7.89489e-05	0.0291965	0.0291965	3708	tags=32%, list=20%, signal=26%	KCNN4/COLEC11/TREM2/THEMIS/TNIP3/CACNB4/CCR7/F2RL1/IGHG2/CD8A/PRKCH/TRAT1/TESPA1/HLA-DQB1/PTPN6/IGHM/CMKLR1/CD226/TNFAIP3/GATA3/CD300A/CD3D/CD28/BCL2/BTN3A1/ITK/HLA-DPB1/CTLA4/TLR4/IGHG3/THEMIS2/LCK/TRBC2/FYB1/THY1/OAS1/CD3E/MS4A1/IGLC3/LIMK1/ICOSLG/BTN3A2/TRBC1/FCGR2B/VAV3/FGR/PRKD2/CR1/UBASH3A/RAB29/NECTIN2/PTPN22/TRAF3/DGKZ/HLA-DRB1/BAX/NFKBID/CEACAM1/LY96/PRKCE/LAPTM5/FPR3/RFTN1/LILRB4/BTK/TL…	7.89489e-05	0.226891	p0_7.89489139498709e-05	p1_0.226890756302521
GO:0002430	complement receptor mediated signaling pathway	11	-0.483698	-1.07807	0.369141	0.69268	0.61211	2195	tags=45%, list=11%, signal=41%	C3AR1/C5AR1/CR1/GPLD1/C3	complement receptor mediated signaling pathway	14	0.482392	1.19008	0.252874	0.74605	0.694976	6	tags=7%, list=0%, signal=7%	CMKLR1	complement receptor mediated signaling pathway	11	-0.260113	-0.545532	0.954899	1	1	3094	tags=36%, list=17%, signal=30%	ITGAM/FPR2/GPLD1/C3	0.252874	0.954899	p1_0.252873563218391	p0_0.954898911353033
GO:0002431	Fc receptor mediated stimulatory signaling pathway	29	-0.381659	-1.05665	0.358209	0.684837	0.60518	3849	tags=34%, list=19%, signal=28%	PTPRJ/FCER1G/PLSCR1/SYK/LYN/FYN/PTPRC/MYO1G/VAV1/FGR	Fc receptor mediated stimulatory signaling pathway	30	-0.29424	-0.898557	0.61039	0.915733	0.853043	1876	tags=13%, list=9%, signal=12%	NR4A3/PRKCD/LYN/PLD2	Fc receptor mediated stimulatory signaling pathway	31	0.340818	1.07897	0.320988	1	1	5229	tags=45%, list=29%, signal=32%	CD226/LIMK1/VAV3/FGR/PRKCE/APPL2/LYN/PTPRC/PLPP4/PRKCD/FYN/PLD2/SRC/HCK	0.320988	0.61039	p0_0.320987654320988	p1_0.61038961038961
GO:0002433	immune response-regulating cell surface receptor signaling pathway involved in phagocytosis	20	-0.415183	-1.07027	0.372361	0.695358	0.614477	1512	tags=30%, list=7%, signal=28%	SYK/LYN/FYN/MYO1G/VAV1/FGR	immune response-regulating cell surface receptor signaling pathway involved in phagocytosis	21	-0.341099	-0.958819	0.51634	0.880588	0.820305	1507	tags=62%, list=7%, signal=58%	PLA2G6/ABL1/YES1/HCK/VAV2/SYK/FYN/PTK2/MYO1G/VAV1/PRKCD/LYN/PLD2	immune response-regulating cell surface receptor signaling pathway involved in phagocytosis	22	0.375773	1.11369	0.311189	1	1	5229	tags=55%, list=29%, signal=39%	LIMK1/VAV3/FGR/PRKCE/APPL2/LYN/PLPP4/PRKCD/FYN/PLD2/SRC/HCK	0.311189	0.51634	p0_0.311188811188811	p1_0.516339869281046
GO:0002437	inflammatory response to antigenic stimulus	62	-0.464745	-1.47612	0.0333812	0.24952	0.220497	1875	tags=31%, list=9%, signal=28%	TNF/BTK/IL36A/LTA/SPN/LYN/FYN/RAB44/RHBDF2/CD28/PLK2/IL20RB/CCR7/FGR/RASGRP1/C3/IL36B/NOD2/IL36RN	inflammatory response to antigenic stimulus	71	-0.166113	-0.589997	0.992925	0.998239	0.929901	4492	tags=19%, list=21%, signal=15%	NOTCH1/IL31RA/TREX1/CD81/IL5RA/HMGB1/IL1F10/MAPK14/CD28/RAB44/PSMA1/CXCR2/IL1RN/PSMA1	inflammatory response to antigenic stimulus	60	-0.372283	-1.04159	0.383495	1	1	1318	tags=10%, list=7%, signal=9%	SYK/ELANE/IL20RB/C3/CNR1/GPX1	0.0333812	0.992925	p3_0.0333811916073231	p1_0.992924528301887
GO:0002438	acute inflammatory response to antigenic stimulus	15	-0.398305	-0.947844	0.520309	0.789647	0.697799	1831	tags=33%, list=9%, signal=30%	BTK/SPN/IL20RB/CCR7/C3	acute inflammatory response to antigenic stimulus	22	-0.432084	-1.22493	0.17382	0.680223	0.633656	6255	tags=50%, list=30%, signal=35%	PARK7/IL20RB/A2M/CNR1/ELANE/SPN/C3/ZP3/NLRP6/FCGR2B/FUT7	acute inflammatory response to antigenic stimulus	24	0.350812	1.06023	0.374101	1	1	3780	tags=58%, list=21%, signal=46%	CD6/FCER1A/CCR7/FCGR2B/FCGR2A/BTK/FCGR3A/SELENOS/FCGR1A/HLA-E/EXT1/PLA2G2D/FCGR3B/CXCR2	0.17382	0.520309	p1_0.17381974248927	p3_0.520309477756286
GO:0002440	production of molecular mediator of immune response	184	-0.379465	-1.39145	0.0102565	0.129043	0.114033	2027	tags=21%, list=10%, signal=19%	ARID5A/LACC1/FFAR3/TNF/TLR7/BTK/TNFRSF4/CR1/CARD9/RSAD2/KLK7/IL33/CD28/TLR9/LAPTM5/IFNB1/SPINK5/PTPRC/TGFB2/SLC7A5/HLA-F/GPRC5B/IL13/IRF5/CD244/DNAJB9/NFKBIZ/AICDA/TLR4/IL18R1/NLRP3/TREM1/KLK5/BST2/GATA3/APOA1/NOD2/IL6/IL1B	production of molecular mediator of immune response	205	0.259614	1.06603	0.296875	0.772802	0.719897	3759	tags=20%, list=18%, signal=17%	LAPTM5/IL33/DENND1B/IL27RA/TMBIM6/TGFB1/MYD88/FFAR2/FCRL3/DDX21/MAPKAPK2/F2RL1/IL17A/NDFIP1/SCIMP/TREX1/CD160/SEMA7A/STAT6/TNFSF4/CLCF1/CD81/MLH1/HSPD1/IL17F/FFAR3/SLC15A4/NOD1/CD226/MCM3AP/SLAMF9/MSH2/PARP3/RBP4/CCR2/CD74/TBX21/GPRC5B/CD28/HFE/RNF168/HPX	production of molecular mediator of immune response	195	0.239431	1.07406	0.183002	1	1	3564	tags=28%, list=20%, signal=23%	F2RL1/BATF/HFE/SLAMF1/IL27RA/SLAMF9/CD226/GATA3/CD28/TLR4/CCR2/BST2/CARD9/CD40LG/TGFB1/KMT5C/CD96/PRKCZ/FCGR2B/IL13RA2/JAK3/NSD2/CR1/ACP5/CD74/LILRB1/IL18R1/IL1R1/MSH2/TNFRSF14/PMS2/LAPTM5/LILRB4/BTK/P2RX7/POLL/SMAD7/TRAF2/SHLD3/IRAK3/B2M/TRAF3IP2/PARP3/CGAS/IGKV4-1/SHLD1/CD55/TCF3/HLA-A/CYREN/PAXIP1/UNG/HLA-E/NLRP3/PTPRC	0.0102565	0.296875	p3_0.0102564589778266	p1_0.296875
GO:0002443	leukocyte mediated immunity	327	-0.390631	-1.52907	0.000207156	0.008387	0.00741146	4264	tags=36%, list=21%, signal=29%	SERPINB9/TLR3/TGFB1/BATF/HLA-G/MICA/IL4R/MICB/HLA-A/CD46/SNAP23/CX3CR1/LAMP1/HLA-H/SMAD7/PRKCZ/PLA2G3/F2RL1/BTN3A3/FCER1G/TNFSF4/TYROBP/C1R/KLRK1/IL27RA/FOXP3/ADORA2B/UNC93B1/CD55/CCR2/CPLX2/GATA1/SASH3/SYK/TREM2/GAB2/HLA-B/C1S/PRAM1/PLA2G1B/SLAMF9/C9/PIK3CD/HLA-C/PVR/ADAM17/F2/ULBP2/CEBPG/ARID5A/TNF/BTK/PTGDR/CR1/CARD9/LGALS9/CD40/CD80/LTA/STXBP2/RSAD2/SPN/UNC13D/KLRC1/LYN/IL4I1/RAB44/IL21R/ULBP…	leukocyte mediated immunity	366	0.251814	1.09767	0.184211	0.685731	0.638787	3923	tags=20%, list=19%, signal=17%	CTSC/RAC2/SERPINB9/SLC18A2/STXBP2/DENND1B/IL27RA/MR1/TGFB1/MYD88/CD1A/RIPK3/MILR1/FES/UNC93B1/DDX21/TUBB/RNF19B/SNAP23/F2RL1/FOXJ1/GZMM/ULBP2/NDFIP1/NCR3/SCIMP/CD1C/RAB27A/CRTAM/TUBB4B/PLA2G3/TREX1/CD160/CD27/CD40/TAP2/PIK3CG/STAT6/NOS2/TNFSF4/CLCF1/CD81/CFI/MLH1/C1QBP/HSPD1/IL18RAP/PTGDS/HMGB1/SLC15A4/CD226/SLAMF9/MSH2/SLAMF6/PARP3/CCR2/GNL1/CD74/PRDX1/IL12A/INPP5D/TBX21/PTAFR/RAET1E/CD28/HAVCR2…	leukocyte mediated immunity	337	0.29524	1.39852	0.000887513	0.15279	0.15279	3609	tags=31%, list=20%, signal=25%	RAET1E/MILR1/C4A/FCER1A/TREM2/F2RL1/CD1E/BATF/IGHG2/CD8A/HFE/SLAMF1/PTPN6/IGHM/CFI/IL27RA/IL7R/SLAMF9/CD226/SLAMF6/GATA3/CD300A/CD28/LGALS9/TLR4/IGHG3/ULBP2/C2/CCR2/CD2/BST2/CARD9/HLA-DRA/CD40LG/TGFB1/IGLC3/C4B/KMT5C/BTN3A2/CD96/PRKCZ/KLRB1/FCGR2B/DNASE1L3/IL13RA2/CD27/IRF7/JAK3/FCGR2A/NSD2/FGR/CR1/CD74/WAS/LILRB1/NECTIN2/IL18R1/IL1R1/MSH2/CRTAM/HLA-DRB1/CORO1A/PMS2/CEACAM1/ANXA3/RFTN1/LILRB4/BTK…	0.000207156	0.184211	p3_0.000207156154560523	p1_0.184210526315789
GO:0002444	myeloid leukocyte mediated immunity	95	-0.480133	-1.62237	0.00432078	0.0788223	0.069654	4117	tags=40%, list=20%, signal=32%	SERPINB9/IL4R/SNAP23/CX3CR1/PLA2G3/F2RL1/TYROBP/ADORA2B/CCR2/CPLX2/GATA1/SYK/GAB2/PRAM1/PLA2G1B/PIK3CD/ADAM17/F2/BTK/PTGDR/CARD9/LGALS9/STXBP2/UNC13D/LYN/RAB44/ANXA3/PTGDS/ITGB2/AZU1/FGR/IL13/RASGRP1/TREM1/C3/GRP/IL6/CXCL6	myeloid leukocyte mediated immunity	102	0.284276	1.06969	0.332192	0.797438	0.742847	1061	tags=10%, list=5%, signal=9%	RAC2/SERPINB9/SLC18A2/STXBP2/MYD88/MILR1/FES/DDX21/SNAP23/F2RL1	myeloid leukocyte mediated immunity	95	-0.247307	-0.732912	0.857307	1	1	2439	tags=16%, list=13%, signal=14%	TICAM2/ARG1/CD177/NR4A3/KIT/CX3CR1/PLA2G1B/SYK/ELANE/FOXF1/SPON2/CTSG/GATA2/C3/IL6	0.00432078	0.857307	p3_0.00432078400616431	p0_0.857307249712313
GO:0002446	neutrophil mediated immunity	32	-0.645889	-1.82269	0.00447567	0.079674	0.0704067	2858	tags=41%, list=14%, signal=35%	SYK/PRAM1/PLA2G1B/ADAM17/F2/CARD9/STXBP2/ANXA3/ITGB2/AZU1/TREM1/IL6/CXCL6	neutrophil mediated immunity	35	0.286833	0.883155	0.6234	0.916355	0.853623	1061	tags=8%, list=5%, signal=8%	STXBP2/MYD88/F2RL1	neutrophil mediated immunity	33	-0.373884	-0.958169	0.480946	1	1	3904	tags=36%, list=22%, signal=29%	ITGAM/MYD88/STXBP2/CXCL6/SCNN1B/ARG1/CD177/PLA2G1B/SYK/ELANE/CTSG/IL6	0.00447567	0.6234	p3_0.00447566844132868	p1_0.623400365630713
GO:0002448	mast cell mediated immunity	50	-0.465445	-1.41792	0.0491803	0.310761	0.274615	4264	tags=44%, list=21%, signal=35%	SERPINB9/IL4R/SNAP23/PLA2G3/ADORA2B/CPLX2/GATA1/SYK/GAB2/PIK3CD/BTK/PTGDR/LGALS9/STXBP2/UNC13D/LYN/RAB44/PTGDS/FGR/IL13/RASGRP1/GRP	mast cell mediated immunity	52	0.392967	1.30894	0.0877514	0.547625	0.510136	1989	tags=17%, list=9%, signal=15%	RAC2/SERPINB9/SLC18A2/STXBP2/MILR1/FES/SNAP23/PLA2G3/PIK3CG	mast cell mediated immunity	43	0.263425	0.912754	0.565611	1	1	2551	tags=21%, list=14%, signal=18%	MILR1/FCER1A/CD300A/LGALS9/IL13RA2/FGR/BTK/SERPINB9/ADGRE2	0.0491803	0.565611	p3_0.0491803278688525	p0_0.565610859728507
GO:0002449	lymphocyte mediated immunity	239	-0.381736	-1.44911	0.00273378	0.0580299	0.0512801	1875	tags=22%, list=9%, signal=20%	TNF/BTK/CR1/CARD9/LGALS9/CD40/CD80/LTA/RSAD2/SPN/UNC13D/KLRC1/IL4I1/IL21R/ULBP1/CD28/C4BPA/IL20RB/IRF7/SVEP1/CD19/AIRE/IFNB1/NCR3/PTPRC/KLRD1/MYO1G/CR1L/INPP5D/JAG1/VAV1/HLA-F/IL2RB/IL18RAP/RASGRP1/CSF2RB/NFKBIZ/AICDA/C4BPB/C8A/IL18R1/NLRP3/CD1D/C8B/GATA3/SLAMF7/IL23A/ICAM1/C3/NOD2/CEACAM1/IL6/IL1B	lymphocyte mediated immunity	274	0.256284	1.08937	0.214876	0.706881	0.658488	3923	tags=21%, list=19%, signal=18%	CTSC/SERPINB9/DENND1B/IL27RA/MR1/TGFB1/MYD88/CD1A/RIPK3/UNC93B1/TUBB/RNF19B/FOXJ1/GZMM/ULBP2/NDFIP1/NCR3/CD1C/RAB27A/CRTAM/TUBB4B/TREX1/CD160/CD27/CD40/TAP2/STAT6/TNFSF4/CLCF1/CD81/CFI/MLH1/C1QBP/HSPD1/IL18RAP/HMGB1/SLC15A4/CD226/MSH2/SLAMF6/PARP3/CCR2/GNL1/CD74/PRDX1/IL12A/INPP5D/TBX21/RAET1E/CD28/HAVCR2/KLRF2/HFE/RNF168/NCR1/HPX/FBXO38/CORO1A/SH2D1A	lymphocyte mediated immunity	257	0.33704	1.56434	5.78129e-05	0.0230905	0.0230905	3757	tags=36%, list=21%, signal=29%	RAET1E/C4A/FCER1A/TREM2/CD1E/BATF/IGHG2/CD8A/HFE/SLAMF1/PTPN6/IGHM/CFI/IL27RA/IL7R/CD226/SLAMF6/GATA3/CD28/LGALS9/IGHG3/ULBP2/C2/CCR2/CD2/CARD9/HLA-DRA/CD40LG/TGFB1/IGLC3/C4B/KMT5C/BTN3A2/CD96/PRKCZ/KLRB1/FCGR2B/IL13RA2/CD27/IRF7/FCGR2A/NSD2/CR1/CD74/WAS/LILRB1/NECTIN2/IL18R1/IL1R1/MSH2/CRTAM/HLA-DRB1/CORO1A/PMS2/CEACAM1/RFTN1/LILRB4/BTK/SERPINB9/P2RX7/C8B/FCGR3A/SMAD7/LAG3/IL23A/TRAF2/SHLD3/C1QC…	5.78129e-05	0.214876	p0_5.78129191662771e-05	p1_0.214876033057851
GO:0002455	humoral immune response mediated by circulating immunoglobulin	42	-0.407618	-1.19831	0.185741	0.519896	0.459424	2846	tags=36%, list=14%, signal=31%	TREM2/C1S/C9/TNF/CR1/LTA/C4BPA/SVEP1/PTPRC/CR1L/C4BPB/C8A/C8B/C3/NOD2	humoral immune response mediated by circulating immunoglobulin	47	-0.311009	-1.04213	0.381974	0.814069	0.758339	2588	tags=21%, list=12%, signal=19%	CR1/C1QB/MASP2/C3/ZP3/C1RL/BCL3/C9/FCGR2B/FCER2	humoral immune response mediated by circulating immunoglobulin	45	0.375613	1.31476	0.0719674	1	1	1529	tags=24%, list=8%, signal=22%	C4A/TREM2/IGHG2/PTPN6/IGHM/CFI/IGHG3/C2/C4B/FCGR2B/CR1	0.0719674	0.381974	p0_0.0719673762264797	p1_0.381974248927039
GO:0002456	T cell mediated immunity	107	-0.48114	-1.65712	0.00166467	0.0407551	0.0360147	4166	tags=45%, list=21%, signal=36%	HLA-G/MICA/MICB/HLA-A/CD46/HLA-H/SMAD7/PRKCZ/BTN3A3/TNFSF4/FOXP3/UNC93B1/CD55/CCR2/SASH3/HLA-B/HLA-C/PVR/ULBP2/ARID5A/CR1/CD80/RSAD2/SPN/KLRC1/IL4I1/ULBP1/C4BPA/IL20RB/AIRE/IFNB1/PTPRC/KLRD1/MYO1G/CR1L/JAG1/HLA-F/NFKBIZ/IL18R1/NLRP3/CD1D/GATA3/IL23A/ICAM1/NOD2/CEACAM1/IL6/IL1B	T cell mediated immunity	118	0.267332	1.02309	0.410839	0.833176	0.776138	3682	tags=18%, list=18%, signal=15%	CTSC/DENND1B/MR1/CD1A/RIPK3/UNC93B1/GZMM/ULBP2/CD1C/RAB27A/TREX1/TAP2/TNFSF4/CD81/HSPD1/HMGB1/CCR2/GNL1/IL12A/TBX21/RAET1E/HFE	T cell mediated immunity	106	0.320001	1.32355	0.0326494	0.933273	0.933273	3609	tags=38%, list=20%, signal=30%	RAET1E/CD1E/CD8A/HFE/SLAMF1/IL7R/GATA3/ULBP2/CCR2/HLA-DRA/BTN3A2/PRKCZ/FCGR2B/CR1/WAS/LILRB1/NECTIN2/IL18R1/IL1R1/HLA-DRB1/CEACAM1/RFTN1/LILRB4/P2RX7/SMAD7/IL23A/TRAF2/B2M/HLA-C/HPRT1/MICB/UNC93B1/CD55/HLA-A/HLA-B/GZMM/HLA-E/NLRP3/PTPRC/IL23R	0.00166467	0.410839	p3_0.00166467330513875	p1_0.410839160839161
GO:0002460	adaptive immune response based on somatic recombination of immune receptors built from immunoglobulin superfamily domains	264	-0.386233	-1.48374	0.00157638	0.0388678	0.0343468	1875	tags=22%, list=9%, signal=21%	TNF/LOXL3/BTK/CR1/CARD9/CD40/CD80/LTA/RSAD2/SPN/UNC13D/KLRC1/IL4I1/TNFAIP3/IL21R/ASCL2/ULBP1/IL33/CD28/STAT4/RELB/C4BPA/IL20RB/IRF7/SVEP1/CD19/AIRE/IFNB1/PTPRC/KLRD1/ZC3H12A/MYO1G/CR1L/INPP5D/JAG1/HLA-F/CCL19/RORC/IL2RB/CSF2RB/NFKBIZ/AICDA/C4BPB/TLR4/EBI3/C8A/IL18R1/NLRP3/CD1D/C8B/IL1RL1/GATA3/IL23A/ICAM1/C3/NOD2/CEACAM1/IL6/IL1B	adaptive immune response based on somatic recombination of immune receptors built from immunoglobulin superfamily domains	287	0.260441	1.10919	0.181364	0.685731	0.638787	3759	tags=21%, list=18%, signal=17%	CTSC/HLX/IL33/SEMA4A/LY9/ZBTB7B/NOTCH1/DENND1B/IL27RA/MR1/ANXA1/TGFB1/MYD88/IL1RL1/CD1A/CCL19/RIPK3/ASCL2/UNC93B1/IL6R/FOXJ1/GZMM/ULBP2/NDFIP1/CD1C/RAB27A/TREX1/CD27/CD40/TAP2/STAT6/TNFSF4/CLCF1/LOXL3/CD81/CFI/MLH1/C1QBP/HSPD1/HMGB1/SLC15A4/CD226/TNFSF13B/MSH2/SLAMF6/PARP3/CCR2/GNL1/CD74/STAT3/SOCS3/IL12A/INPP5D/TBX21/RAET1E/CD28/HAVCR2/HFE/RNF168/HPX	adaptive immune response based on somatic recombination of immune receptors built from immunoglobulin superfamily domains	276	0.330087	1.5432	0.000111003	0.0382194	0.0382194	3609	tags=33%, list=20%, signal=27%	RAET1E/C4A/FCER1A/TREM2/CD1E/BATF/IGHG2/CD8A/HFE/SLAMF1/PTPN6/IGHM/CFI/IL27RA/IL7R/CD226/TNFAIP3/SLAMF6/GATA3/CD28/LOXL3/TLR4/IGHG3/ULBP2/C2/CCR2/CARD9/HLA-DRA/CD40LG/TGFB1/IGLC3/C4B/KMT5C/BTN3A2/PRKCZ/FCGR2B/IL13RA2/CD27/IRF7/IL18BP/JAK3/FCGR2A/NSD2/CR1/CD74/WAS/LILRB1/NECTIN2/IL18R1/IL1R1/MSH2/IRF4/HLA-DRB1/NFKBID/PMS2/CEACAM1/STAT4/LEF1/RFTN1/LILRB4/BTK/P2RX7/C8B/FCGR3A/SMAD7/IL23A/TRAF2/SHLD3…	0.000111003	0.181364	p0_0.000111002843423888	p1_0.181364392678869
GO:0002467	germinal center formation	14	-0.647815	-1.51399	0.0440821	0.297454	0.262856	4950	tags=50%, list=24%, signal=38%	ADA/BCL6/KLHL6/ADAM17/NFKB2/UNC13D/TNFAIP3	germinal center formation	14	-0.577438	-1.46387	0.0625	0.493767	0.459964	3464	tags=57%, list=16%, signal=48%	ADAM17/BCL6/UNC13D/BCL3/KLHL6/CXCL13/RC3H1/MEF2C	germinal center formation	13	0.257575	0.669876	0.844575	1	1	553	tags=8%, list=3%, signal=7%	TNFAIP3	0.0440821	0.844575	p3_0.0440821277293591	p0_0.844574780058651
GO:0002468	dendritic cell antigen processing and presentation	14	-0.434269	-1.01492	0.460194	0.755564	0.66768	1067	tags=43%, list=5%, signal=41%	THBS1/CCL21/CCR7/CCL19/MPEG1/NOD2	dendritic cell antigen processing and presentation	14	0.496762	1.22553	0.210728	0.703724	0.655549	4211	tags=36%, list=20%, signal=29%	CCL19/CCL21/NOD1/CD74/CLEC4A	dendritic cell antigen processing and presentation	15	0.363524	0.973403	0.47546	1	1	1988	tags=40%, list=11%, signal=36%	CCR7/FGL2/HLA-DRA/FCGR2B/CD74/HLA-DRB1	0.210728	0.47546	p1_0.210727969348659	p0_0.475460122699386
GO:0002474	antigen processing and presentation of peptide antigen via MHC class I	35	-0.473163	-1.35816	0.0836431	0.372061	0.328784	4166	tags=69%, list=21%, signal=55%	TAP2/IDE/B2M/IFI30/TAPBP/ERAP2/HLA-E/HLA-G/MICA/MICB/HLA-A/CLEC4A/CALR/HLA-H/FCER1G/ERAP1/TAP1/HLA-B/HLA-C/PDIA3/ULBP2/ULBP1/HLA-F/MPEG1	antigen processing and presentation of peptide antigen via MHC class I	32	0.391056	1.17906	0.222022	0.711019	0.662344	4350	tags=25%, list=21%, signal=20%	SAR1B/MR1/ULBP2/TAP2/RAET1E/HFE/CLEC4A/IFI30	antigen processing and presentation of peptide antigen via MHC class I	33	0.515577	1.6511	0.0071489	0.496885	0.496885	4872	tags=58%, list=27%, signal=42%	RAET1E/HFE/ULBP2/ERAP2/TAP1/ACE/FCGR1A/B2M/HLA-C/MICB/HLA-A/HLA-B/HLA-E/TAP2/TAPBP/IDE/MFSD6/MICA/MR1	0.0071489	0.222022	p0_0.00714889614599798	p1_0.222021660649819
GO:0002475	antigen processing and presentation via MHC class Ib	20	-0.485336	-1.25111	0.178503	0.512506	0.452894	4166	tags=55%, list=21%, signal=44%	HLA-G/MICA/MICB/HLA-A/HLA-H/HLA-B/HLA-C/ULBP2/ULBP1/HLA-F/CD1D	antigen processing and presentation via MHC class Ib	21	0.419827	1.15584	0.259669	0.749665	0.698344	3682	tags=29%, list=18%, signal=24%	CD1A/ULBP2/CD1C/TAP2/RAET1E/HFE	antigen processing and presentation via MHC class Ib	19	0.565715	1.59936	0.0220504	0.802517	0.802517	4081	tags=63%, list=23%, signal=49%	RAET1E/CD1E/HFE/ULBP2/B2M/HLA-C/MICB/HLA-A/HLA-B/HLA-E/CD1C/TAP2	0.0220504	0.259669	p0_0.0220504103097144	p1_0.259668508287293
GO:0002476	antigen processing and presentation of endogenous peptide antigen via MHC class Ib	16	-0.456447	-1.09621	0.332685	0.663528	0.586349	4166	tags=62%, list=21%, signal=50%	HLA-G/MICA/MICB/HLA-A/HLA-H/HLA-B/HLA-C/ULBP2/ULBP1/HLA-F	antigen processing and presentation of endogenous peptide antigen via MHC class Ib	13	0.420583	1.02383	0.442777	0.843237	0.78551	3682	tags=31%, list=18%, signal=25%	ULBP2/TAP2/RAET1E/HFE	antigen processing and presentation of endogenous peptide antigen via MHC class Ib	13	0.648366	1.68621	0.0140796	0.644885	0.644885	4609	tags=77%, list=25%, signal=57%	RAET1E/HFE/ULBP2/HLA-C/MICB/HLA-A/HLA-B/HLA-E/TAP2/MICA	0.0140796	0.442777	p0_0.0140796119659911	p1_0.442776735459662
GO:0002478	antigen processing and presentation of exogenous peptide antigen	36	0.503604	1.48699	0.0343185	0.254333	0.22475	1396	tags=22%, list=7%, signal=21%	HLA-DRA/HLA-DRB5/HLA-DMB/HLA-DRB1/HLA-DOA/CD74/HLA-DOB/HLA-DQB1	antigen processing and presentation of exogenous peptide antigen	36	-0.263029	-0.828137	0.757238	0.956298	0.890831	3293	tags=25%, list=16%, signal=21%	CTSD/CTSF/MFSD6/TRAF6/IKBKB/DNM2/FCGR2B/HLA-DOB/PIKFYVE	antigen processing and presentation of exogenous peptide antigen	36	0.629089	2.05592	0.000108502	0.0382194	0.0382194	3477	tags=56%, list=19%, signal=45%	HLA-DRB5/HLA-DQA1/HLA-DQB1/HLA-DPB1/HLA-DPA1/HLA-DOA/HLA-DRA/FCGR2B/CTSF/CD74/CTSD/HLA-DRB1/PIKFYVE/CTSS/HLA-DMA/FCGR1A/B2M/UNC93B1/HLA-A/HLA-E	0.000108502	0.757238	p0_0.000108501847027394	p1_0.757238307349666
GO:0002483	antigen processing and presentation of endogenous peptide antigen	24	0.389233	1.05155	0.389691	0.708752	0.626314	484	tags=12%, list=2%, signal=12%	HLA-DRA/RAET1E/HLA-DRB1	antigen processing and presentation of endogenous peptide antigen	20	0.339453	0.91975	0.55948	0.900399	0.838759	3682	tags=20%, list=18%, signal=17%	ULBP2/TAP2/RAET1E/HFE	antigen processing and presentation of endogenous peptide antigen	21	0.663409	1.93889	0.00255888	0.268952	0.268952	4609	tags=81%, list=25%, signal=60%	RAET1E/HFE/ULBP2/HLA-DRA/ERAP2/TAP1/HLA-DRB1/B2M/HLA-C/MICB/HLA-A/HLA-B/HLA-E/TAP2/TAPBP/IDE/MICA	0.00255888	0.55948	p0_0.00255888345294435	p1_0.559479553903346
GO:0002484	antigen processing and presentation of endogenous peptide antigen via MHC class I via ER pathway	16	-0.456447	-1.09621	0.332685	0.663528	0.586349	4166	tags=62%, list=21%, signal=50%	HLA-G/MICA/MICB/HLA-A/HLA-H/HLA-B/HLA-C/ULBP2/ULBP1/HLA-F	antigen processing and presentation of endogenous peptide antigen via MHC class I via ER pathway	13	0.420583	1.02383	0.442777	0.843237	0.78551	3682	tags=31%, list=18%, signal=25%	ULBP2/TAP2/RAET1E/HFE	antigen processing and presentation of endogenous peptide antigen via MHC class I via ER pathway	13	0.648366	1.68621	0.0140796	0.644885	0.644885	4609	tags=77%, list=25%, signal=57%	RAET1E/HFE/ULBP2/HLA-C/MICB/HLA-A/HLA-B/HLA-E/TAP2/MICA	0.0140796	0.442777	p0_0.0140796119659911	p1_0.442776735459662
GO:0002486	antigen processing and presentation of endogenous peptide antigen via MHC class I via ER pathway, TAP-independent	15	-0.470918	-1.12064	0.313346	0.650369	0.574721	4166	tags=67%, list=21%, signal=53%	HLA-G/MICA/MICB/HLA-A/HLA-H/HLA-B/HLA-C/ULBP2/ULBP1/HLA-F	antigen processing and presentation of endogenous peptide antigen via MHC class I via ER pathway, TAP-independent	12	0.339524	0.810017	0.735075	0.948991	0.884024	3682	tags=25%, list=18%, signal=21%	ULBP2/RAET1E/HFE	antigen processing and presentation of endogenous peptide antigen via MHC class I via ER pathway, TAP-independent	12	0.667763	1.70563	0.0150798	0.664572	0.664572	3477	tags=67%, list=19%, signal=54%	RAET1E/HFE/ULBP2/HLA-C/MICB/HLA-A/HLA-B/HLA-E	0.0150798	0.735075	p0_0.0150797629439327	p1_0.735074626865672
GO:0002495	antigen processing and presentation of peptide antigen via MHC class II	29	0.598077	1.68811	0.00711297	0.106496	0.0941085	2787	tags=38%, list=14%, signal=33%	HLA-DRA/HLA-DRB5/HLA-DMB/HLA-DRB1/HLA-DOA/CD74/HLA-DOB/HLA-DQB1/PYCARD/CTSL/HLA-DPA1	antigen processing and presentation of peptide antigen via MHC class II	30	-0.248742	-0.759614	0.850649	0.9676	0.90136	3293	tags=27%, list=16%, signal=23%	HLA-DQA1/CTSD/CTSF/TRAF6/DNM2/FCGR2B/HLA-DOB/PIKFYVE	antigen processing and presentation of peptide antigen via MHC class II	28	0.742345	2.28937	1.49433e-06	0.00373022	0.00373022	3129	tags=64%, list=17%, signal=53%	HLA-DRB5/HLA-DQA1/TREM2/HLA-DQB1/HLA-DPB1/HLA-DPA1/HLA-DOA/HLA-DRA/FCGR2B/CTSF/CD74/CTSD/HLA-DRB1/PIKFYVE/CTSS/HLA-DMA/B2M/UNC93B1	1.49433e-06	0.850649	p0_1.49432997923337e-06	p1_0.850649350649351
GO:0002501	peptide antigen assembly with MHC protein complex	18	0.722129	1.80445	0.00150878	0.0380081	0.0335872	1396	tags=39%, list=7%, signal=36%	HLA-DRA/HLA-DRB5/HLA-DMB/HLA-DRB1/HLA-DOA/HLA-DOB/HLA-DQB1	peptide antigen assembly with MHC protein complex	17	-0.171416	-0.458071	0.995789	0.998378	0.93003	17405	tags=29%, list=83%, signal=5%	TAPBP/HLA-DMA/HLA-DPB1/HLA-DQA1/HLA-DOB	peptide antigen assembly with MHC protein complex	18	0.709863	1.95364	0.000488032	0.101521	0.101521	3283	tags=61%, list=18%, signal=50%	HLA-DRB5/HLA-DQA1/HLA-DQB1/HLA-DPB1/HLA-DPA1/HLA-DOA/HLA-DRA/HLA-DRB1/HLA-DMA/B2M/HLA-A	0.000488032	0.995789	p0_0.000488031933584447	p1_0.995789473684211
GO:0002503	peptide antigen assembly with MHC class II protein complex	13	0.830477	1.91354	0.000454382	0.0153005	0.0135208	1396	tags=54%, list=7%, signal=50%	HLA-DRA/HLA-DRB5/HLA-DMB/HLA-DRB1/HLA-DOA/HLA-DOB/HLA-DQB1	peptide antigen assembly with MHC class II protein complex	13	0.208065	0.506497	0.977486	0.993155	0.925165	4073	tags=23%, list=19%, signal=19%	HLA-DQB1/HLA-DPA1/HLA-DOA	peptide antigen assembly with MHC class II protein complex	13	0.785514	2.04289	0.000144162	0.04362	0.04362	2922	tags=77%, list=16%, signal=65%	HLA-DRB5/HLA-DQA1/HLA-DQB1/HLA-DPB1/HLA-DPA1/HLA-DOA/HLA-DRA/HLA-DRB1/HLA-DMA/B2M	0.000144162	0.977486	p0_0.000144162319118561	p1_0.977485928705441
GO:0002504	antigen processing and presentation of peptide or polysaccharide antigen via MHC class II	31	0.57244	1.64366	0.0176869	0.172315	0.152272	2787	tags=35%, list=14%, signal=31%	HLA-DRA/HLA-DRB5/HLA-DMB/HLA-DRB1/HLA-DOA/CD74/HLA-DOB/HLA-DQB1/PYCARD/CTSL/HLA-DPA1	antigen processing and presentation of peptide or polysaccharide antigen via MHC class II	32	-0.245478	-0.757687	0.850446	0.9676	0.90136	3293	tags=25%, list=16%, signal=21%	HLA-DQA1/CTSD/CTSF/TRAF6/DNM2/FCGR2B/HLA-DOB/PIKFYVE	antigen processing and presentation of peptide or polysaccharide antigen via MHC class II	30	0.709353	2.21152	3.89635e-06	0.0061681	0.0061681	3129	tags=60%, list=17%, signal=50%	HLA-DRB5/HLA-DQA1/TREM2/HLA-DQB1/HLA-DPB1/HLA-DPA1/HLA-DOA/HLA-DRA/FCGR2B/CTSF/CD74/CTSD/HLA-DRB1/PIKFYVE/CTSS/HLA-DMA/B2M/UNC93B1	3.89635e-06	0.850446	p0_3.89635148031952e-06	p1_0.850446428571429
GO:0002507	tolerance induction	22	-0.418077	-1.0998	0.327586	0.660441	0.583621	3388	tags=41%, list=17%, signal=34%	HLA-G/FOXP3/HLA-B/CBLB/LGALS9/LYN/TNFAIP3/AIRE/CCR4	tolerance induction	28	-0.406159	-1.21933	0.180043	0.685731	0.638787	1752	tags=17%, list=8%, signal=16%	LILRB2/LYN/PSG9/CD274/PHLPP1	tolerance induction	24	0.52599	1.58965	0.0277153	0.885606	0.885606	3479	tags=46%, list=19%, signal=37%	PDCD1/TNFAIP3/ICOS/LGALS9/CD3E/IDO1/LILRB4/IRAK3/HLA-B/HLA-E/LYN	0.0277153	0.327586	p0_0.0277152998504225	p3_0.327586206896552
GO:0002517	T cell tolerance induction	10	-0.588509	-1.27654	0.184369	0.519019	0.458649	4166	tags=50%, list=21%, signal=40%	HLA-G/FOXP3/HLA-B/CBLB/AIRE	T cell tolerance induction	15	-0.418655	-1.07466	0.362661	0.810826	0.755318	1752	tags=33%, list=8%, signal=31%	TGFBR2/HLA-B/HLA-G/LILRB2/PHLPP1	T cell tolerance induction	12	0.467151	1.19322	0.252874	1	1	3325	tags=42%, list=18%, signal=34%	ICOS/CD3E/IDO1/LILRB4/HLA-B	0.184369	0.362661	p3_0.18436873747495	p1_0.362660944206009
GO:0002520	immune system development	171	0.279787	1.067	0.29927	0.635621	0.561688	2081	tags=13%, list=10%, signal=12%	FGF10/EXO1/CCNB2/FOXE1/POLQ/ATAD5/HAVCR2/IL10/RIPK3/LEF1/MAFB/IL7R/SLC46A2/HMGB2/CDH17/CCR6/CD248/RAG1/TOX/PITX2/HMGB1/PSG9/SIX1	immune system development	184	-0.22894	-0.959396	0.545861	0.893886	0.832692	3769	tags=22%, list=18%, signal=18%	ZBTB1/TP53/PPP2R3C/KMT2A/ADAM17/ATM/LGALS9/CXCR5/BCL6/CTC1/SWAP70/RC3H2/FOXI3/SOD1/TP53BP1/LRP5/IL4/CITED2/HOXA3/PITX2/BCL3/LILRB2/SIX4/CACNB4/DCLRE1C/CCR6/BRAF/LYN/LEF1/SRF/PSG9/NFKBIZ/RC3H1/CD274/RET/PMS2/FOXL1/FOXN1/SAMHD1/TFRC/PHLPP1	immune system development	168	0.290033	1.28496	0.0345845	0.956581	0.956581	3564	tags=27%, list=20%, signal=22%	SIX1/CACNB4/BATF/PDCD1/IL27RA/IL7R/BCL2L11/TNFAIP3/ICOS/GATA3/CD28/BCL2/LGALS9/CD40LG/CD3E/TGFB1/CITED2/KMT5C/NSD2/MSH2/IDO1/CDKN2B/PMS2/LEF1/MAD1L1/LILRB4/POLL/SHLD3/IRAK3/DCAF1/TRAF3IP2/PARP3/HOXB4/LRP5/MAP2K1/SHLD1/TCF3/CYREN/PAXIP1/HLA-B/CTC1/UNG/SMAD3/HLA-E/LYN/PTPRC	0.0345845	0.545861	p0_0.034584458118241	p1_0.54586129753915
GO:0002523	leukocyte migration involved in inflammatory response	13	0.397483	0.915858	0.563941	0.814186	0.719483	1409	tags=38%, list=7%, signal=36%	TRIM55/ELANE/LBP/CCR6/PTN	leukocyte migration involved in inflammatory response	19	-0.504568	-1.3767	0.0831557	0.539245	0.502329	5028	tags=58%, list=24%, signal=44%	ALOX5/LBP/ELANE/SLAMF8/CX3CL1/MDK/CCR6/FUT7/ADAM8/PTN/NINJ1	leukocyte migration involved in inflammatory response	17	-0.444586	-1.01961	0.431818	1	1	1057	tags=24%, list=6%, signal=22%	ELANE/SELE/S100A9/S100A8	0.0831557	0.563941	p1_0.0831556503198294	p3_0.563941299790356
GO:0002524	hypersensitivity	9	-0.728593	-1.54746	0.0562294	0.315911	0.279165	1831	tags=56%, list=9%, signal=51%	BTK/SPN/IL20RB/CCR7/C3	hypersensitivity	13	-0.674038	-1.65627	0.00976086	0.169269	0.157681	3242	tags=38%, list=15%, signal=33%	SPN/C3/ZP3/FCGR2B/FUT7	hypersensitivity	15	0.418482	1.12056	0.297546	1	1	3751	tags=67%, list=21%, signal=53%	FCER1A/CCR7/FCGR2B/FCGR2A/BTK/FCGR3A/FCGR1A/HLA-E/EXT1/FCGR3B	0.00976086	0.297546	p1_0.00976085941947756	p0_0.297546012269939
GO:0002526	acute inflammatory response	80	-0.559245	-1.83409	0.000111514	0.00520313	0.00459793	2611	tags=35%, list=13%, signal=31%	VNN1/MYLK3/F2/ITIH4/FFAR3/TNF/BTK/SPN/TFR2/PTGES/OSM/NUPR1/SERPINA3/AHSG/B4GALT1/IL20RB/CCR7/ALOX5AP/NLRP3/C3/C2CD4B/SAA2/PTGS2/IL6/SAA1/C2CD4A/IL1A/IL1B	acute inflammatory response	99	-0.305993	-1.15868	0.197619	0.690518	0.643246	5445	tags=34%, list=26%, signal=25%	MYLK3/OSMR/ACVR1/EIF2AK1/PRCP/F8/LBP/PTGS2/EDNRB/ELANE/IL6/ORM2/ASH1L/IL6/TFR2/SAA4/SPN/IL1A/ITIH4/ASS1/CTNNBIP1/C3/ZP3/CEBPB/NLRP6/FCGR2B/SERPINA1/FUT7/VNN1/NUPR1/SAA2/ADAM8/ORM1/TFRC	acute inflammatory response	82	-0.326833	-0.952071	0.512367	1	1	2501	tags=34%, list=14%, signal=30%	TNFSF4/SAA2/IL1A/SIGIRR/NUPR1/F3/SPN/PTGES/LBP/SERPINA1/TNFRSF11A/IGHG1/MYLK3/NPY5R/PTGS2/ORM1/SERPINF2/SERPINA3/OSM/ELANE/IL20RB/ITIH4/C2CD4B/C3/CNR1/IL6/HP/SAA1	0.000111514	0.512367	p3_0.000111513536738059	p0_0.512367491166078
GO:0002532	production of molecular mediator involved in inflammatory response	77	-0.42702	-1.40085	0.0298057	0.232306	0.205285	2918	tags=30%, list=14%, signal=26%	PLD4/SYK/TREM2/GRN/F2/NCF1/PLA2G10/TNF/BTK/CARD9/SLAMF8/PBXIP1/LYN/SERPINE1/RAB44/ZC3H12A/GBP5/TLR4/ALOX5AP/IL17B/P2RX1/NOD2/IL6	production of molecular mediator involved in inflammatory response	85	-0.197664	-0.735269	0.937209	0.984924	0.917497	3960	tags=24%, list=19%, signal=20%	CUEDC2/ZC3H12A/NCF1/IL6/SLAMF8/IL17B/TICAM1/PPARA/GBP5/CHID1/CARD9/MIR221/EXTL3/PLD4/MIR17/IL17RA/LYN/PBXIP1/CHIA/PSG9/CD36	production of molecular mediator involved in inflammatory response	74	0.257683	0.998293	0.450331	1	1	1445	tags=18%, list=8%, signal=16%	CD6/TREM2/PLD4/TLR4/ALOX5/NLRC3/CARD9/DUSP10/SLAMF8/ADCY7/EZH2/GBP5/IL17D	0.0298057	0.937209	p3_0.0298056715975348	p1_0.937209302325581
GO:0002534	cytokine production involved in inflammatory response	53	-0.359853	-1.09757	0.287823	0.625707	0.552927	2918	tags=23%, list=14%, signal=19%	PLD4/TREM2/F2/PLA2G10/TNF/CARD9/ZC3H12A/GBP5/TLR4/IL17B/NOD2/IL6	cytokine production involved in inflammatory response	60	-0.200118	-0.692791	0.952381	0.990488	0.92268	4233	tags=26%, list=20%, signal=21%	IL6/CUEDC2/ZC3H12A/IL6/IL17B/TICAM1/PPARA/GBP5/CHID1/CARD9/MIR221/EXTL3/PLD4/MIR17/IL17RA/PSG9	cytokine production involved in inflammatory response	50	0.315327	1.13538	0.245098	1	1	1445	tags=22%, list=8%, signal=20%	CD6/TREM2/PLD4/TLR4/ALOX5/NLRC3/CARD9/ADCY7/EZH2/GBP5/IL17D	0.245098	0.952381	p0_0.245098039215686	p1_0.952380952380952
GO:0002544	chronic inflammatory response	17	-0.632628	-1.55824	0.0417629	0.287016	0.253632	3388	tags=71%, list=17%, signal=59%	FOXP3/ADORA2B/VNN1/THBS1/TNF/LTA/VCAM1/UNC13D/TNFAIP3/NFKBIZ/CCL5/CCL11	chronic inflammatory response	19	-0.414407	-1.13069	0.298507	0.773701	0.720735	3319	tags=42%, list=16%, signal=35%	IL10/CYP19A1/CCL5/CCL11/UNC13D/VNN1/CXCL13/NFKBIZ	chronic inflammatory response	13	-0.46528	-0.999529	0.447806	1	1	287	tags=31%, list=2%, signal=30%	IL10/THBS1/S100A9/S100A8	0.0417629	0.447806	p3_0.0417628951384481	p0_0.447806354009077
GO:0002548	monocyte chemotaxis	54	-0.610685	-1.87383	0.000297747	0.0108832	0.00961735	3165	tags=50%, list=16%, signal=42%	AIF1/CCL14/CCL25/CCR2/S100A7/CALCA/FLT1/CCL3L3/SLIT2/SLAMF8/LYN/SERPINE1/PTPRO/CCL26/LGMN/CCL21/CCL19/CXCL10/CCL5/CX3CL1/CCL8/IL6/PDGFB/CCL2/CCL20/CCL7/CCL11	monocyte chemotaxis	62	0.36223	1.25796	0.102389	0.574969	0.535608	2149	tags=17%, list=10%, signal=15%	DEFB104B/CCL26/CCL7/CCL22/ANXA1/CCL19/IL6R/SERPINE1/CCL2/LGMN/CCL21	monocyte chemotaxis	56	-0.485761	-1.35256	0.133578	1	1	1623	tags=29%, list=9%, signal=26%	CX3CR1/GREM1/MSMP/CCL19/CXCL17/CCL8/S100A14/CCL2/CTSG/CALCA/CCL14/CCL13/CCL21/IL6/CCL3L3/S100A12	0.000297747	0.133578	p3_0.00029774703990691	p0_0.133578431372549
GO:0002551	mast cell chemotaxis	11	-0.609915	-1.35939	0.130859	0.449222	0.39697	893	tags=36%, list=4%, signal=35%	PIK3CD/PGF/VEGFA/CCL11	mast cell chemotaxis	11	0.497133	1.15096	0.290807	0.766498	0.714024	1422	tags=18%, list=7%, signal=17%	RAC2/PGF	mast cell chemotaxis	10	-0.438446	-0.908817	0.576453	1	1	2062	tags=50%, list=11%, signal=44%	RIN3/SWAP70/VEGFA/KIT/VEGFD	0.130859	0.576453	p3_0.130859375	p0_0.576452599388379
GO:0002562	somatic diversification of immune receptors via germline recombination within a single locus	59	0.338191	1.09508	0.289294	0.626901	0.553983	1791	tags=14%, list=9%, signal=12%	EXO1/ATAD5/IL10/LEF1/HMGB2/CCR6/RAG1/HMGB1	somatic diversification of immune receptors via germline recombination within a single locus	61	0.281594	0.972929	0.541237	0.89079	0.829808	3686	tags=28%, list=18%, signal=23%	IL27RA/RAG2/TGFB1/NDFIP1/STAT6/TNFSF4/CLCF1/MLH1/HSPD1/HMGB1/SLC15A4/RAG1/MSH2/PARP3/TBX21/CD28/RNF168	somatic diversification of immune receptors via germline recombination within a single locus	63	0.366099	1.37893	0.0525766	1	1	3564	tags=30%, list=20%, signal=24%	BATF/IL27RA/CD28/CD40LG/TGFB1/KMT5C/NSD2/MSH2/PMS2/LEF1/SHLD3/DCAF1/PARP3/SHLD1/TCF3/CYREN/PAXIP1/UNG/PTPRC	0.0525766	0.541237	p0_0.0525765611939518	p1_0.541237113402062
GO:0002566	somatic diversification of immune receptors via somatic mutation	14	0.534332	1.26027	0.180698	0.515537	0.455572	238	tags=14%, list=1%, signal=14%	EXO1/POLQ	somatic diversification of immune receptors via somatic mutation	14	-0.418837	-1.0618	0.366667	0.810826	0.755318	635	tags=14%, list=3%, signal=14%	PMS2/SAMHD1	somatic diversification of immune receptors via somatic mutation	13	0.29664	0.771475	0.744868	1	1	3791	tags=38%, list=21%, signal=30%	MSH2/PMS2/POLL/UNG/POLQ	0.180698	0.744868	p3_0.180698151950719	p0_0.744868035190616
GO:0002573	myeloid leukocyte differentiation	217	-0.314103	-1.17439	0.123967	0.439448	0.388334	4231	tags=29%, list=21%, signal=24%	TLR3/EPHA2/TGFB1/BATF/NAGLU/IL34/GPR137B/FSTL3/INHBA/PLA2G3/ID2/F2RL1/OSTM1/TYROBP/APP/FASN/TMEM178A/CEBPB/BMP4/GATA1/POU4F2/TREM2/FBN1/GAB2/BMP2/CSF1/PIK3CD/PF4/INHA/ATP6AP1/NEDD9/BATF2/CSF2/PIR/CALCR/IAPP/TNF/TF/ZFPM1/UBD/LYN/IL33/RELB/IRF7/TAL1/TNFRSF11B/CCR7/INPP5D/CCL19/CD101/LTF/VEGFA/ITGB8/TLR4/HCLS1/LIF/TESC/TNFAIP6/OSCAR/IL1RL1/GATA3/IL23A/CEACAM1/CSF3	myeloid leukocyte differentiation	225	0.248447	1.0336	0.378151	0.812864	0.757217	3946	tags=21%, list=19%, signal=17%	RASSF2/LRRK1/IL33/CSF1R/ROR2/FSTL3/NRROS/LRRC17/TGFB1/MYD88/IL1RL1/CCL19/CASP8/BMP2/FES/TNFAIP6/F2RL1/IL17A/NDFIP1/DHRS2/CLPB/HCLS1/OCSTAMP/IL31RA/PLA2G3/DHRS7B/BGLAP/CD81/NDP/NKX2-3/MAFB/CARTPT/PF4/CDC42/GPR68/DIAPH3/RB1/CD74/TAL1/MAPK14/INPP5D/SLC4A2/PARP1/IFNG/PRTN3/GAB3/MT1G	myeloid leukocyte differentiation	204	0.247308	1.11567	0.107276	1	1	2797	tags=21%, list=15%, signal=18%	NDP/IL34/TREM2/CCR7/F2RL1/BATF/CD109/TNFRSF11B/EPHA2/CAMK4/PPARG/GATA3/TLR4/SNX10/TGFB1/CITED2/TF/BATF2/IFNG/DIAPH3/SOCS1/GPR68/IRF7/TMEM178A/CD74/LRRK1/LILRB1/RUNX1/IRF4/HLA-DRB1/PIAS3/CEACAM1/ERFE/LEF1/LILRB4/BMP4/EVI2B/PPARGC1B/L3MBTL3/IL23A/C1QC/DHRS7B	0.107276	0.378151	p0_0.10727573856931	p1_0.378151260504202
GO:0002577	regulation of antigen processing and presentation	18	-0.409014	-1.02542	0.424762	0.731585	0.64649	2846	tags=33%, list=14%, signal=29%	TREM2/THBS1/CCL21/CCR7/CCL19/NOD2	regulation of antigen processing and presentation	19	0.332077	0.884549	0.621013	0.916355	0.853623	4073	tags=32%, list=19%, signal=25%	CCL19/CCL21/NOD1/CD74/HFE/HLA-DOA	regulation of antigen processing and presentation	19	0.488824	1.38198	0.0993151	1	1	1729	tags=42%, list=10%, signal=38%	TREM2/CCR7/HFE/FGL2/HLA-DOA/FCGR2B/CD74/WAS	0.0993151	0.621013	p0_0.0993150684931507	p1_0.621013133208255
GO:0002604	regulation of dendritic cell antigen processing and presentation	10	-0.666578	-1.44588	0.0741483	0.354514	0.313279	2301	tags=50%, list=11%, signal=44%	THBS1/CCL21/CCR7/CCL19/NOD2	regulation of dendritic cell antigen processing and presentation	10	0.57733	1.31619	0.149338	0.654572	0.609761	3174	tags=40%, list=15%, signal=34%	CCL19/CCL21/NOD1/CD74	regulation of dendritic cell antigen processing and presentation	11	0.351275	0.874536	0.593315	1	1	1670	tags=36%, list=9%, signal=33%	CCR7/FGL2/FCGR2B/CD74	0.0741483	0.593315	p3_0.0741482965931864	p0_0.593314763231198
GO:0002637	regulation of immunoglobulin production	59	-0.284012	-0.892528	0.648313	0.860809	0.760684	1875	tags=36%, list=9%, signal=32%	APLF/IL13RA2/SLC15A4/TGFB1/IL4R/TNFSF4/IL27RA/FOXP3/SASH3/XBP1/TNF/BTK/TNFRSF4/CR1/IL33/CD28/TLR9/PTPRC/IL13/DNAJB9/IL6	regulation of immunoglobulin production	67	0.335335	1.1756	0.181034	0.685731	0.638787	4290	tags=31%, list=20%, signal=25%	IL33/IL27RA/TMBIM6/TGFB1/FCRL3/NDFIP1/TREX1/STAT6/TNFSF4/CLCF1/MLH1/SLC15A4/MSH2/PARP3/RBP4/TBX21/CD28/HPX/DNAJB9/IL13RA2/EXOSC3	regulation of immunoglobulin production	63	0.314912	1.18614	0.148571	1	1	3564	tags=32%, list=20%, signal=26%	IL27RA/CD28/CD40LG/TGFB1/KMT5C/FCGR2B/IL13RA2/NSD2/CR1/MSH2/PMS2/BTK/TRAF2/SHLD3/PARP3/CGAS/SHLD1/PAXIP1/HLA-E/PTPRC	0.148571	0.648313	p0_0.148571428571429	p3_0.648312611012433
GO:0002638	negative regulation of immunoglobulin production	9	0.442186	0.933238	0.555777	0.808565	0.714517	54	tags=11%, list=0%, signal=11%	CD22	negative regulation of immunoglobulin production	12	0.563052	1.3433	0.123134	0.611904	0.570014	1268	tags=33%, list=6%, signal=31%	IL33/TMBIM6/FCRL3/NDFIP1	negative regulation of immunoglobulin production	10	0.366665	0.882527	0.597701	1	1	2981	tags=40%, list=16%, signal=33%	FCGR2B/IL13RA2/CR1/PARP3	0.123134	0.597701	p1_0.123134328358209	p0_0.597701149425287
GO:0002639	positive regulation of immunoglobulin production	41	-0.339794	-0.998517	0.45951	0.755507	0.66763	1831	tags=27%, list=9%, signal=24%	SASH3/XBP1/BTK/TNFRSF4/IL33/CD28/TLR9/PTPRC/IL13/DNAJB9/IL6	positive regulation of immunoglobulin production	46	0.268493	0.869438	0.689266	0.933746	0.869823	4290	tags=28%, list=20%, signal=22%	IL33/TGFB1/STAT6/TNFSF4/CLCF1/MLH1/MSH2/RBP4/TBX21/CD28/HPX/DNAJB9/EXOSC3	positive regulation of immunoglobulin production	44	0.23395	0.8215	0.757848	1	1	3564	tags=27%, list=20%, signal=22%	CD28/TGFB1/KMT5C/NSD2/MSH2/PMS2/BTK/SHLD3/SHLD1/PAXIP1/HLA-E/PTPRC	0.45951	0.757848	p3_0.459510357815443	p0_0.757847533632287
GO:0002643	regulation of tolerance induction	14	0.400052	0.943555	0.533881	0.794658	0.702227	2510	tags=21%, list=12%, signal=19%	HAVCR2/HMGB1/IDO1	regulation of tolerance induction	19	-0.389633	-1.0631	0.371002	0.810826	0.755318	1752	tags=16%, list=8%, signal=14%	LILRB2/CD274/PHLPP1	regulation of tolerance induction	17	0.440283	1.20329	0.221477	1	1	3325	tags=35%, list=18%, signal=29%	PDCD1/CD3E/IDO1/LILRB4/IRAK3/HLA-B	0.221477	0.533881	p0_0.221476510067114	p3_0.53388090349076
GO:0002645	positive regulation of tolerance induction	9	-0.391777	-0.832096	0.688	0.880847	0.77839	4166	tags=56%, list=21%, signal=44%	CD274/IRAK3/HLA-G/FOXP3/CBLB	positive regulation of tolerance induction	12	0.317845	0.758297	0.815299	0.966142	0.900001	2697	tags=25%, list=13%, signal=22%	ITCH/FOXJ1/CD3E	positive regulation of tolerance induction	11	0.487268	1.21311	0.220056	1	1	2857	tags=36%, list=16%, signal=31%	CD3E/IDO1/LILRB4/IRAK3	0.220056	0.815299	p0_0.220055710306407	p1_0.815298507462687
GO:0002664	regulation of T cell tolerance induction	9	-0.509445	-1.08201	0.368	0.691912	0.611432	4166	tags=44%, list=21%, signal=35%	HLA-G/FOXP3/HLA-B/CBLB	regulation of T cell tolerance induction	13	-0.471854	-1.15946	0.266525	0.750801	0.699402	1752	tags=38%, list=8%, signal=35%	TGFBR2/HLA-B/HLA-G/LILRB2/PHLPP1	regulation of T cell tolerance induction	11	0.376403	0.937094	0.495822	1	1	3325	tags=36%, list=18%, signal=30%	CD3E/IDO1/LILRB4/HLA-B	0.266525	0.495822	p1_0.266524520255864	p0_0.495821727019499
GO:0002673	regulation of acute inflammatory response	37	-0.753414	-2.18704	2.25558e-06	0.000176461	0.000155936	1921	tags=43%, list=10%, signal=39%	FFAR3/TNF/BTK/SPN/PTGES/OSM/IL20RB/CCR7/ALOX5AP/NLRP3/C3/C2CD4B/PTGS2/IL6/C2CD4A/IL1B	regulation of acute inflammatory response	43	-0.225221	-0.74025	0.909287	0.978794	0.911788	6383	tags=39%, list=30%, signal=27%	TNFRSF11A/PARK7/IL20RB/RHBDD3/CNR1/OSMR/PTGS2/EDNRB/IL6/ASH1L/IL6/SPN/C3/ZP3/FCGR2B/FUT7/ADAM8	regulation of acute inflammatory response	38	-0.368931	-0.969302	0.482714	1	1	1189	tags=29%, list=7%, signal=27%	SPN/PTGES/TNFRSF11A/NPY5R/PTGS2/OSM/IL20RB/C2CD4B/C3/CNR1/IL6	2.25558e-06	0.909287	p3_2.25558317906438e-06	p1_0.909287257019438
GO:0002675	positive regulation of acute inflammatory response	23	-0.804641	-2.13997	1.46747e-05	0.000903495	0.000798404	1921	tags=52%, list=10%, signal=47%	FFAR3/TNF/BTK/OSM/CCR7/ALOX5AP/C3/C2CD4B/PTGS2/IL6/C2CD4A/IL1B	positive regulation of acute inflammatory response	27	0.195176	0.564687	0.981584	0.994148	0.92609	6383	tags=36%, list=30%, signal=25%	TNFRSF11A/PARK7/CNR1/OSMR/PTGS2/IL6/IL6/C3/ZP3/ADAM8	positive regulation of acute inflammatory response	24	-0.470166	-1.15274	0.270718	1	1	3056	tags=33%, list=17%, signal=28%	TNFRSF11A/NPY5R/PTGS2/OSM/C2CD4B/C3/CNR1/IL6	1.46747e-05	0.981584	p3_1.46747322199082e-05	p1_0.98158379373849
GO:0002679	respiratory burst involved in defense response	12	-0.485406	-1.11345	0.34275	0.671194	0.593123	4711	tags=67%, list=23%, signal=51%	LIPA/RPS19/MPO/TREM2/GRN/PIK3CD/NCF1/SLAMF8	respiratory burst involved in defense response	14	0.317757	0.783921	0.768199	0.958621	0.892995	1989	tags=21%, list=9%, signal=19%	DUSP10/MPO/PIK3CG	respiratory burst involved in defense response	16	0.330835	0.897937	0.568182	1	1	974	tags=19%, list=5%, signal=18%	TREM2/DUSP10/SLAMF8	0.34275	0.768199	p3_0.342749529190207	p1_0.768199233716475
GO:0002683	negative regulation of immune system process	432	-0.266339	-1.06593	0.260188	0.605244	0.534845	4231	tags=29%, list=21%, signal=24%	TLR3/MIF/TGFB1/HLA-G/TSC22D1/MICA/IL4R/GPR108/HLA-A/ARG2/TAX1BP1/CD46/GPR137B/CX3CR1/STAT2/MIA3/FSTL3/INHBA/DLG1/PTPRJ/SMAD7/SYT11/RHBDD3/LDLR/ID2/F2RL1/TNFSF4/CXCL12/ZC3H8/TYROBP/DPP4/KLRK1/IL27RA/PARP14/TMEM178A/FOXP3/CEBPB/BMP4/CD55/CCL25/CCR2/MNDA/SYK/TREM2/UBASH3A/COL3A1/SHH/FBN1/HLA-B/IRF1/BPI/GRN/DHX58/SAMSN1/INHA/CBLB/THBS1/PELI1/SQSTM1/MDK/PAWR/TSC22D3/SLIT2/CD33/FGL1/IAPP/TNF/LOXL3/BTK/…	negative regulation of immune system process	470	0.258932	1.15074	0.0995025	0.569897	0.530883	4145	tags=21%, list=20%, signal=17%	LAPTM5/HLX/IL33/SERPINB9/PTPN22/SIRT2/ZBTB7B/FSTL3/LRRC17/PRNP/THY1/IL27RA/ANXA1/RAG2/TMBIM6/TGFB1/IL1RL1/PLA2G5/ADTRP/MILR1/ASCL2/DRD2/AURKB/PDCD1LG2/FCRL3/TNFAIP6/ITCH/F2RL1/FOXJ1/TIGIT/LRFN5/LPXN/TSPAN6/NDFIP1/METTL3/CASP3/CRTAM/SDC4/ELF1/TSPAN32/DUSP10/EIF4E2/IL31RA/TREX1/CD160/CCL2/LYAR/NLRC3/STAT6/TMEM176B/TNFSF4/CCL21/YWHAZ/LOXL3/GRAMD4/RAB7B/SAMSN1/TRAFD1/C1QBP/LST1/MAFB/CBFB/CARTPT/GPAM/…	negative regulation of immune system process	426	-0.206881	-0.664665	0.985915	1	1	3214	tags=14%, list=18%, signal=11%	CST7/FSTL3/IL33/USP38/TMEM176B/TTLL12/GPAM/THBS1/CD22/MNDA/ADA/GBP1/LILRB2/IL2RA/MEFV/FCRL3/CLEC4G/KIR2DL4/NPY5R/ARG1/MFHAS1/PLCB1/GPER1/FBXW7/TYRO3/TMEM176A/IL1RL1/GRAMD4/SPINK5/MYC/LRFN5/CX3CR1/GREM1/NR1D1/LAX1/SYK/LTF/FOXF1/CCL2/BPIFB1/IL20RB/TRIB1/CTSG/C4BPA/BMP5/GATA2/CLDN18/SVEP1/SFTPD/CNR1/CCL21/LDLR/APOD/SCGB1A1/SFRP1/PTPRS/PLA2G2A/GPX1	0.0995025	0.985915	p1_0.0995024875621891	p0_0.985915492957746
GO:0002685	regulation of leukocyte migration	203	-0.439859	-1.62991	0.000118519	0.00545659	0.00482191	4021	tags=36%, list=20%, signal=29%	IL34/CX3CR1/MMP14/CALR/MIA3/BST1/PTK2B/F2RL1/TMEM102/CXCL12/JAM2/DPP4/KLRK1/IL27RA/APP/TRPV4/AIF1/CCL25/CCR2/EDN2/S100A7/TREM2/XG/CAMK1D/CSF1/ADAM17/NEDD9/THBS1/RARRES2/C3AR1/C5AR1/MDK/SLIT2/TNF/SLAMF8/LGALS9/TACR1/SPN/LYN/SERPINE1/ASCL2/IL33/CD200/LGMN/BDKRB1/MADCAM1/CCL21/AIRE/TNFSF18/PGF/CCR7/PDGFD/CCL19/VEGFA/CXCL10/PADI2/TNFAIP6/CCL5/TNFSF14/CX3CL1/IL23A/ICAM1/CCL8/EDN1/PLVAP/NOD2/SELE/IL6/C…	regulation of leukocyte migration	215	0.255192	1.05007	0.336806	0.798028	0.743396	3174	tags=18%, list=15%, signal=15%	CMKLR1/CCL7/RAC2/IL33/CSF1R/MPP1/THY1/IL27RA/ANXA1/MYD88/CCL19/RIPK3/ADTRP/RARRES2/ASCL2/ITGB3/IL6R/MSN/TNFAIP6/F2RL1/SPNS2/PGF/SERPINE1/GCNT1/F7/CCL2/LGMN/JAM2/CCL21/CD81/C1QBP/PLVAP/HMGB1/CD200/TIRAP/CCL28/DAPK2/CCR2/CD74	regulation of leukocyte migration	200	0.302956	1.35491	0.00697381	0.493855	0.493855	2199	tags=23%, list=12%, signal=20%	GCNT1/CHST2/PTN/PDGFD/IL34/TREM2/MDK/CCR7/F2RL1/PGF/SLAMF1/CXCR3/IL27RA/CMKLR1/CCL5/XG/CCL7/FUT4/CD200R1/CD9/CD300A/LGALS9/SMPD3/GAS6/PLA2G7/CCR2/SLAMF8/ITGA4/DAPK2/ECM1/THY1/BST1/CXCL12/STK10/CD74/SLC8B1/IL1R1/MCU/DPP4/CD200/TMEM102/CCL4/CORO1A/TNFRSF14/CCL20/TRPV4	0.000118519	0.336806	p3_0.000118518974829043	p1_0.336805555555556
GO:0002686	negative regulation of leukocyte migration	44	-0.33903	-1.00044	0.465779	0.757741	0.669604	3903	tags=34%, list=19%, signal=28%	MIF/MIA3/CXCL12/DPP4/KLRK1/IL27RA/CCL25/SLIT2/SLAMF8/IL33/CD200/CCL21/PADI2/TNFAIP6/CCL2	negative regulation of leukocyte migration	45	0.311966	1.00523	0.433712	0.843237	0.78551	2951	tags=18%, list=14%, signal=15%	IL33/IL27RA/ADTRP/TNFAIP6/CCL2/CCL21/CD200/CCL28	negative regulation of leukocyte migration	44	-0.265157	-0.71073	0.840822	1	1	3154	tags=23%, list=17%, signal=19%	EMILIN1/GPR18/IL33/ADA/PLCB1/GREM1/CCL2/BMP5/CCL21/APOD	0.433712	0.840822	p1_0.433712121212121	p0_0.840821566110398
GO:0002687	positive regulation of leukocyte migration	135	-0.506409	-1.79893	3.04464e-05	0.0017124	0.00151323	4021	tags=44%, list=20%, signal=35%	IL34/CX3CR1/MMP14/CALR/MIA3/PTK2B/F2RL1/TMEM102/CXCL12/JAM2/APP/TRPV4/AIF1/CCR2/EDN2/S100A7/TREM2/XG/CAMK1D/CSF1/ADAM17/NEDD9/THBS1/RARRES2/C3AR1/C5AR1/MDK/TNF/LGALS9/TACR1/SPN/SERPINE1/ASCL2/LGMN/BDKRB1/MADCAM1/CCL21/TNFSF18/PGF/CCR7/PDGFD/CCL19/VEGFA/CXCL10/CCL5/TNFSF14/CX3CL1/IL23A/ICAM1/CCL8/EDN1/PLVAP/SELE/IL6/CCL20/CCL7/IL1A/SELP/CXCL8	positive regulation of leukocyte migration	144	-0.259827	-1.05337	0.337963	0.7991	0.744395	3464	tags=24%, list=16%, signal=21%	ADAM17/VEGFB/LGALS9/SPN/CCL1/STK39/SWAP70/IL1A/CX3CL1/WNT5A/OXSR1/TNFRSF18/EDN2/ZP3/MDK/S100A7/XCL1/CX3CR1/ITGA4/CCR6/WNK1/FUT7/KITLG/CXCL13/ADAM8/PTN/MOSPD2/GAS6/PRSS56/AIF1/CCL3/EDN1/NEDD9/CCL20/S100A14/PTK2B	positive regulation of leukocyte migration	136	0.290368	1.24817	0.101065	1	1	2199	tags=23%, list=12%, signal=20%	PTN/PDGFD/IL34/TREM2/MDK/CCR7/F2RL1/PGF/SLAMF1/CMKLR1/CCL5/XG/CCL7/FUT4/LGALS9/GAS6/PLA2G7/CCR2/ITGA4/DAPK2/THY1/CXCL12/CD74/IL1R1/MCU/TMEM102/CCL4/CORO1A/TNFRSF14/CCL20/TRPV4	3.04464e-05	0.337963	p3_3.04464074652288e-05	p1_0.337962962962963
GO:0002688	regulation of leukocyte chemotaxis	105	-0.478623	-1.64091	0.00189203	0.0447422	0.039538	4021	tags=45%, list=20%, signal=36%	IL34/CX3CR1/CALR/BST1/PTK2B/F2RL1/TMEM102/CXCL12/DPP4/KLRK1/TRPV4/AIF1/CCR2/EDN2/S100A7/CAMK1D/CSF1/ADAM17/NEDD9/THBS1/RARRES2/C3AR1/C5AR1/MDK/SLIT2/SLAMF8/LGALS9/LYN/SERPINE1/LGMN/CCL21/PGF/CCR7/CCL19/VEGFA/CXCL10/PADI2/TNFAIP6/CCL5/TNFSF14/IL23A/EDN1/NOD2/IL6/CCL2/CCL7/CXCL8	regulation of leukocyte chemotaxis	114	-0.255362	-0.991646	0.468235	0.853963	0.795502	3464	tags=27%, list=16%, signal=22%	ADAM17/VEGFB/LGALS9/SLAMF8/CCL1/STK39/SWAP70/C5AR2/WNT5A/OXSR1/MIF/EDN2/MDK/S100A7/XCL1/CX3CR1/DPP4/CCR6/WNK1/LYN/CXCL13/PTN/MOSPD2/GAS6/PRSS56/AIF1/CCL3/EDN1/NEDD9/S100A14/PTK2B	regulation of leukocyte chemotaxis	108	0.299814	1.24435	0.0734803	1	1	3479	tags=33%, list=19%, signal=27%	PTN/IL34/MDK/CCR7/F2RL1/PGF/SLAMF1/CMKLR1/CCL5/CCL7/LGALS9/GAS6/PLA2G7/CCR2/SLAMF8/DAPK2/BST1/CXCL12/CD74/SLC8B1/MCU/DPP4/TMEM102/CCL4/TRPV4/MPP1/PTK2B/MOSPD2/IL23A/IL6R/C5AR2/TIRAP/SERPINE1/EDN1/CSF1/LYN	0.00189203	0.468235	p3_0.00189202835362863	p1_0.468235294117647
GO:0002689	negative regulation of leukocyte chemotaxis	17	-0.551279	-1.35786	0.111111	0.422247	0.373133	3499	tags=47%, list=17%, signal=39%	MIF/DPP4/KLRK1/SLIT2/SLAMF8/PADI2/TNFAIP6/CCL2	negative regulation of leukocyte chemotaxis	18	-0.207729	-0.563248	0.981132	0.993853	0.925815	4270	tags=39%, list=20%, signal=31%	CYP19A1/MMP28/DDT/SLAMF8/C5AR2/MIF/DPP4	negative regulation of leukocyte chemotaxis	17	-0.232298	-0.532751	0.971591	1	1	1601	tags=41%, list=9%, signal=38%	RIN3/DDT/PADI2/SLIT2/GPR18/GREM1/CCL2	0.111111	0.981132	p3_0.111111111111111	p1_0.981132075471698
GO:0002690	positive regulation of leukocyte chemotaxis	81	-0.459907	-1.50514	0.0149071	0.157902	0.139535	4021	tags=46%, list=20%, signal=37%	IL34/CX3CR1/CALR/PTK2B/F2RL1/TMEM102/CXCL12/TRPV4/AIF1/CCR2/EDN2/S100A7/CAMK1D/CSF1/ADAM17/NEDD9/THBS1/RARRES2/C3AR1/C5AR1/MDK/LGALS9/SERPINE1/LGMN/CCL21/PGF/CCR7/CCL19/VEGFA/CXCL10/CCL5/TNFSF14/IL23A/EDN1/IL6/CCL7/CXCL8	positive regulation of leukocyte chemotaxis	89	-0.275784	-1.0305	0.393365	0.821108	0.764896	3464	tags=29%, list=16%, signal=24%	ADAM17/VEGFB/LGALS9/CCL1/STK39/SWAP70/WNT5A/OXSR1/EDN2/MDK/S100A7/XCL1/CX3CR1/CCR6/WNK1/CXCL13/PTN/MOSPD2/GAS6/PRSS56/AIF1/CCL3/EDN1/NEDD9/S100A14/PTK2B	positive regulation of leukocyte chemotaxis	84	0.317805	1.26518	0.0836347	1	1	2710	tags=29%, list=15%, signal=24%	PTN/IL34/MDK/CCR7/F2RL1/PGF/SLAMF1/CMKLR1/CCL5/CCL7/LGALS9/GAS6/PLA2G7/CCR2/DAPK2/CXCL12/CD74/MCU/TMEM102/CCL4/TRPV4/PTK2B/MOSPD2/IL23A	0.0149071	0.393365	p3_0.0149071282725143	p1_0.393364928909953
GO:0002691	regulation of cellular extravasation	38	-0.454864	-1.31442	0.0979667	0.399252	0.352813	3761	tags=34%, list=19%, signal=28%	BST1/CXCL12/IL27RA/CCL25/CCR2/XG/MDK/CCL21/PDGFD/ICAM1/PLVAP/SELE/SELP	regulation of cellular extravasation	40	0.339177	1.07602	0.32965	0.796872	0.742319	5044	tags=38%, list=24%, signal=29%	THY1/IL27RA/RIPK3/GCNT1/CCL21/PLVAP/CCL28/CCR2/BST1/PTAFR/XG/GP1BA/CD47/FUT4/CHST2	regulation of cellular extravasation	36	0.453857	1.48325	0.0279135	0.885606	0.885606	1381	tags=33%, list=8%, signal=31%	GCNT1/CHST2/PDGFD/MDK/IL27RA/XG/FUT4/CCR2/ITGA4/THY1/BST1/CXCL12	0.0279135	0.32965	p0_0.027913528846939	p1_0.329650092081031
GO:0002693	positive regulation of cellular extravasation	18	-0.634969	-1.5919	0.0472516	0.307523	0.271754	3128	tags=33%, list=15%, signal=28%	CCR2/XG/MDK/PDGFD/ICAM1/PLVAP	positive regulation of cellular extravasation	18	0.288452	0.75561	0.815238	0.966142	0.900001	4642	tags=33%, list=22%, signal=26%	THY1/PLVAP/CCR2/PTAFR/XG/CD47	positive regulation of cellular extravasation	19	0.43054	1.2172	0.191781	1	1	1869	tags=32%, list=10%, signal=28%	PDGFD/MDK/XG/CCR2/THY1/IL1R1	0.0472516	0.815238	p3_0.0472516474892931	p1_0.815238095238095
GO:0002695	negative regulation of leukocyte activation	158	-0.276054	-0.997803	0.468966	0.759232	0.670922	4166	tags=35%, list=21%, signal=28%	HLA-G/MICA/IL4R/ARG2/INHBA/DLG1/SMAD7/SYT11/RHBDD3/LDLR/ID2/TNFSF4/ZC3H8/TYROBP/FOXP3/CEBPB/BMP4/MNDA/SHH/IRF1/BPI/GRN/SAMSN1/INHA/CBLB/PELI1/MDK/PAWR/CD33/FGL1/LOXL3/BTK/CR1/LGALS9/CD80/SPN/PRNP/CNR2/LYN/IL4I1/TNFAIP3/ASCL2/ADGRF5/CD200/VTCN1/TBC1D10C/IL20RB/LAPTM5/IFNB1/PTPRC/SFTPD/ZC3H12A/INPP5D/FGR/NRARP/ADORA2A	negative regulation of leukocyte activation	176	0.281419	1.13896	0.177305	0.6831	0.636336	2777	tags=16%, list=13%, signal=14%	LAPTM5/HLX/PTPN22/ZBTB7B/PRNP/ANXA1/RAG2/PLA2G5/MILR1/ASCL2/PDCD1LG2/ITCH/FOXJ1/TIGIT/LRFN5/NDFIP1/CASP3/CRTAM/SDC4/TSPAN32/IL31RA/TNFSF4/LOXL3/SAMSN1/LST1/CBFB/VTCN1/HMGB1/CD200	negative regulation of leukocyte activation	156	0.262354	1.14026	0.112657	1	1	3607	tags=33%, list=20%, signal=27%	MILR1/MDK/ADGRF5/HFE/GPNMB/PTPN6/CD33/TNFAIP3/CD300A/FGL2/LOXL3/LGALS9/CTLA4/SOCS1/FCGR2B/TNFAIP8L2/JAK3/FGR/CBFB/CR1/GLI3/CD74/RUNX3/LILRB1/PTPN22/RUNX1/IDO1/CRTAM/HLA-DRB1/CD200/RHBDD3/TNFRSF14/SAMSN1/MAD1L1/LAPTM5/LILRB4/BTK/BMP4/SMAD7/LAG3/PELI1/PARP3/TIGIT/PDCD1LG2/VSIR/FN1/SOCS5/PIBF1/HLA-E/LYN/PTPRC/PLA2G2D	0.112657	0.468966	p0_0.112656663136048	p3_0.468965517241379
GO:0002696	positive regulation of leukocyte activation	313	-0.325292	-1.26337	0.0470779	0.306941	0.271239	3194	tags=24%, list=16%, signal=20%	EFNB2/CD55/ACTL6B/AIF1/CCR2/HLA-DQA2/SASH3/SYK/TREM2/WNT3A/SHH/SIRPG/TNFSF9/IL15RA/IRS2/VNN1/CARD11/XBP1/THBS1/PELI1/EFNB3/CD209/MDK/CDKN1A/IL2RG/TNF/BTK/TNFRSF4/CR1/LGALS9/TACR1/CD80/SPN/VCAM1/LYN/IL4I1/FYN/RASAL3/SPACA3/MAP3K8/IL33/CD28/HES1/VTCN1/TLR9/CCL21/PTPRC/IGFBP2/CCR7/INPP5D/VAV1/CCL19/IL13/WNT10B/RASGRP1/NFKBIZ/CHRNB2/TLR4/ICOSLG/EBI3/NLRP3/CCL5/CD1D/IL1RL1/GATA3/TNFSF14/IL23A/IL36B/NO…	positive regulation of leukocyte activation	336	0.213683	0.921013	0.752108	0.954402	0.889065	3917	tags=19%, list=19%, signal=16%	CTSC/EGR3/HLX/IL33/ZBTB7B/THY1/ANXA1/TGFB1/MYD88/IL1RL1/CCL19/SLC7A1/PDCD1LG2/FCRL3/PNP/CARD11/HHLA2/TNIP2/DUSP10/HSPH1/ITPKB/CD160/CCL2/CD27/CD276/STAT6/HAMP/XRCC6/TNFSF4/CLCF1/SH3KBP1/CCL21/CD81/MLH1/HSPD1/CBFB/GPAM/VTCN1/CD3E/HMGB1/TIRAP/CD226/RAG1/IL1RL2/TNFSF13B/AKIRIN2/TESPA1/MSH2/CCR2/WNT10B/CD74/HES1/IL12A/ICOS/INPP5D/TBX21/HLA-DQB1/BST1/CD28/HAVCR2/SIRPA/IFNG/HLA-DPA1/PLA2G4A/CORO1A	positive regulation of leukocyte activation	317	0.336347	1.56865	3.15731e-05	0.0182835	0.0182835	3635	tags=33%, list=20%, signal=27%	HLA-DRB5/CD6/CD5/HLA-DQA1/TREM2/MDK/CCR7/VCAM1/TESPA1/SLAMF1/HLA-DQB1/PTPN6/IL7R/CCL5/CD226/ICOS/KLHL25/TNFSF9/GATA3/RHOH/CD28/BCL2/LGALS9/HLA-DPB1/TLR4/GAS6/HLA-DPA1/LCK/HLA-DOA/CCR2/CD2/DUSP10/HLA-DRA/CD40LG/THY1/CD3E/TGFB1/SIRPG/CD83/CLEC4D/KMT5C/ICOSLG/IFNG/BST1/PRKCZ/SOCS1/VAV3/SOX13/CD27/CCDC88B/NSD2/CBFB/CR1/GLI3/CD74/RUNX3/LILRB1/NECTIN2/MSH2/RUNX1/DPP4/DNAJA3/HLA-DRB1/NFKBID/IL2RG/CORO1A…	3.15731e-05	0.752108	p0_3.15731143253104e-05	p1_0.752107925801012
GO:0002697	regulation of immune effector process	311	-0.378203	-1.46759	0.000847785	0.0250602	0.0221454	2885	tags=28%, list=14%, signal=25%	SASH3/SYK/TREM2/GAB2/HLA-B/PRAM1/CFP/COLEC10/DDX60/GRN/DHX58/HLA-C/XBP1/PVR/ULBP2/NCF1/ARID5A/LACC1/FFAR3/TNF/LOXL3/TLR7/BTK/TNFRSF4/CR1/CARD9/SLAMF8/LGALS9/CD80/LTA/STXBP2/RSAD2/SPN/CFH/UNC13D/KLK7/KLRC1/LYN/IL4I1/ASCL2/ULBP1/IL33/CD28/C4BPA/TLR9/IL20RB/SVEP1/LAPTM5/COLEC11/IFNB1/SPINK5/NCR3/PTPRC/KLRD1/ZC3H12A/TGFB2/ITGB2/CR1L/SLC7A5/VAV1/HLA-F/CCL19/FGR/GPRC5B/IL13/IRF5/CD244/DNAJB9/IL18RAP/RA…	regulation of immune effector process	357	0.298978	1.29797	0.00845587	0.159601	0.148675	4291	tags=23%, list=20%, signal=19%	LAPTM5/HLX/RAC2/IL33/SERPINB9/ZBTB7B/STXBP2/DENND1B/IL27RA/MR1/ANXA1/TMBIM6/TGFB1/MYD88/FFAR2/PLA2G5/CD1A/CCL19/RIPK3/FES/ASCL2/FCRL3/DDX21/MAPKAPK2/CFP/F2RL1/FOXJ1/IL17A/ULBP2/NDFIP1/NCR3/FCN2/SCIMP/CD1C/CRTAM/DUSP10/PLA2G3/TREX1/CD160/SEMA7A/TAP2/STAT6/NOS2/TNFSF4/CLCF1/LOXL3/CD81/MLH1/C1QBP/HSPD1/IL18RAP/IL17F/FFAR3/HMGB1/SLC15A4/NOD1/CD226/MSH2/SLAMF6/PARP3/RBP4/CCR2/CD74/IL12A/TBX21/GPRC5B/P…	regulation of immune effector process	317	0.256796	1.19764	0.0347968	0.959281	0.959281	3757	tags=31%, list=21%, signal=25%	RAET1E/COLEC11/TREM2/F2RL1/CD1E/BATF/HFE/SLAMF1/PTPN6/IL27RA/IL7R/CD226/SLAMF6/GATA3/CD300A/CD28/FGL2/CFH/LOXL3/LGALS9/TLR4/ULBP2/CCR2/BST2/CARD9/DUSP10/SLAMF8/HLA-DRA/CD40LG/TGFB1/KMT5C/IFNG/CD96/PRKCZ/KLRB1/FCGR2B/DNASE1L3/IL13RA2/JAK3/NSD2/DHX58/FGR/CR1/ACP5/CD74/WAS/LILRB1/NECTIN2/IL18R1/IL1R1/MSH2/CRTAM/IRF4/HLA-DRB1/NFKBID/TNFRSF14/PMS2/ZNF683/CEACAM1/LAPTM5/LILRB4/BTK/SERPINB9/P2RX7/ADGRE2…	0.000847785	0.0347968	p3_0.000847785394347728	p0_0.0347968086038272
GO:0002698	negative regulation of immune effector process	101	-0.417524	-1.42463	0.0265939	0.215354	0.190305	1875	tags=27%, list=9%, signal=24%	TNF/LOXL3/CR1/SLAMF8/LGALS9/CD80/SPN/KLRC1/IL4I1/ASCL2/IL33/C4BPA/IL20RB/SVEP1/IFNB1/SPINK5/PTPRC/KLRD1/ZC3H12A/TGFB2/CR1L/HLA-F/C4BPB/BST2/APOA1/NOD2/CEACAM1	negative regulation of immune effector process	118	0.294471	1.12695	0.229021	0.718089	0.668929	2288	tags=12%, list=11%, signal=10%	HLX/IL33/SERPINB9/ZBTB7B/ANXA1/TMBIM6/TGFB1/ASCL2/FCRL3/FOXJ1/NDFIP1/DUSP10/TNFSF4/LOXL3	negative regulation of immune effector process	104	0.306468	1.25731	0.0542228	1	1	3757	tags=35%, list=21%, signal=28%	HFE/SLAMF1/PTPN6/IL7R/CD300A/FGL2/LOXL3/LGALS9/CCR2/BST2/DUSP10/SLAMF8/TGFB1/CD96/FCGR2B/IL13RA2/JAK3/CR1/ACP5/LILRB1/CEACAM1/LILRB4/SERPINB9/SMAD7/IRAK3/PARP3/BCR/CD55/SOCS5/HLA-A/HLA-B/CRK/HLA-E/PTPRC/PGLYRP2/CR1L	0.0265939	0.229021	p3_0.0265938990959496	p1_0.229020979020979
GO:0002699	positive regulation of immune effector process	208	-0.401276	-1.49051	0.00089538	0.0262435	0.0231909	4231	tags=41%, list=21%, signal=33%	TLR3/MIF/TGFB1/HLA-G/MICA/IL4R/MICB/HLA-A/CD46/LAMP1/HLA-H/PRKCZ/PLA2G3/F2RL1/TNFSF4/TYROBP/RIPK2/KLRK1/FOXP3/ADORA2B/CD55/CCR2/GATA1/SASH3/SYK/TREM2/GAB2/HLA-B/CFP/COLEC10/DDX60/DHX58/HLA-C/XBP1/PVR/ULBP2/ARID5A/LACC1/FFAR3/TNF/TLR7/BTK/TNFRSF4/CR1/CARD9/LGALS9/CD80/LTA/RSAD2/KLK7/KLRC1/ULBP1/IL33/CD28/TLR9/LAPTM5/COLEC11/NCR3/PTPRC/KLRD1/ITGB2/SLC7A5/VAV1/HLA-F/CCL19/FGR/GPRC5B/IL13/IRF5/CD244/…	positive regulation of immune effector process	234	0.317258	1.32505	0.00910055	0.163757	0.152546	4158	tags=25%, list=20%, signal=20%	LAPTM5/HLX/IL33/DENND1B/MR1/ANXA1/TGFB1/MYD88/FFAR2/PLA2G5/CD1A/CCL19/DDX21/MAPKAPK2/CFP/F2RL1/IL17A/ULBP2/NCR3/FCN2/SCIMP/CD1C/CRTAM/PLA2G3/CD160/SEMA7A/TAP2/STAT6/NOS2/TNFSF4/CLCF1/CD81/MLH1/HSPD1/IL18RAP/IL17F/FFAR3/NOD1/CD226/MSH2/SLAMF6/RBP4/CCR2/CD74/IL12A/TBX21/GPRC5B/PTAFR/RAET1E/CD28/HFE/HPX/IFNG/FBXO38/SH2D1A/DNAJB9/MAVS/APPL2	positive regulation of immune effector process	211	0.253561	1.14869	0.0801085	1	1	3325	tags=28%, list=18%, signal=23%	RAET1E/COLEC11/TREM2/F2RL1/CD1E/HFE/SLAMF1/PTPN6/CD226/SLAMF6/GATA3/CD300A/CD28/LGALS9/TLR4/ULBP2/CCR2/CARD9/HLA-DRA/TGFB1/KMT5C/IFNG/PRKCZ/NSD2/DHX58/FGR/CR1/CD74/LILRB1/NECTIN2/IL18R1/IL1R1/MSH2/CRTAM/HLA-DRB1/NFKBID/TNFRSF14/PMS2/LAPTM5/BTK/P2RX7/LAG3/DDX60/IL23A/TRAF2/SHLD3/FCGR1A/B2M/HLA-C/MICB/APPL2/KLRC4/RARA/SHLD1/CD55/SOCS5/HLA-A/PAXIP1/HLA-B	0.00089538	0.0801085	p3_0.000895379930074974	p0_0.0801085280890924
GO:0002700	regulation of production of molecular mediator of immune response	152	-0.409681	-1.48179	0.00726968	0.107445	0.0949472	2027	tags=24%, list=10%, signal=21%	ARID5A/LACC1/FFAR3/TNF/TLR7/BTK/TNFRSF4/CR1/CARD9/RSAD2/KLK7/IL33/CD28/TLR9/LAPTM5/IFNB1/SPINK5/PTPRC/TGFB2/SLC7A5/HLA-F/GPRC5B/IL13/IRF5/CD244/DNAJB9/TLR4/IL18R1/NLRP3/KLK5/BST2/GATA3/APOA1/NOD2/IL6/IL1B	regulation of production of molecular mediator of immune response	173	0.29405	1.18475	0.122083	0.610164	0.568393	3759	tags=22%, list=18%, signal=18%	LAPTM5/IL33/DENND1B/IL27RA/TMBIM6/TGFB1/MYD88/FFAR2/FCRL3/DDX21/MAPKAPK2/F2RL1/IL17A/NDFIP1/SCIMP/TREX1/CD160/SEMA7A/STAT6/TNFSF4/CLCF1/CD81/MLH1/IL17F/FFAR3/SLC15A4/NOD1/CD226/MSH2/PARP3/RBP4/CCR2/CD74/TBX21/GPRC5B/CD28/HFE/HPX	regulation of production of molecular mediator of immune response	160	0.256022	1.11318	0.143222	1	1	3564	tags=29%, list=20%, signal=24%	F2RL1/HFE/SLAMF1/IL27RA/CD226/GATA3/CD28/TLR4/CCR2/BST2/CARD9/CD40LG/TGFB1/KMT5C/CD96/PRKCZ/FCGR2B/IL13RA2/JAK3/NSD2/CR1/ACP5/CD74/LILRB1/IL18R1/IL1R1/MSH2/TNFRSF14/PMS2/LAPTM5/LILRB4/BTK/P2RX7/SMAD7/TRAF2/SHLD3/IRAK3/B2M/PARP3/CGAS/SHLD1/CD55/HLA-A/PAXIP1/HLA-E/NLRP3/PTPRC	0.00726968	0.143222	p3_0.00726968062701763	p0_0.143221780000475
GO:0002701	negative regulation of production of molecular mediator of immune response	35	-0.462278	-1.32692	0.0947955	0.393437	0.347675	1875	tags=29%, list=9%, signal=26%	TNF/CR1/IL33/IFNB1/SPINK5/TGFB2/HLA-F/BST2/APOA1/NOD2	negative regulation of production of molecular mediator of immune response	45	0.325508	1.04886	0.38447	0.816287	0.760405	1268	tags=11%, list=6%, signal=10%	IL33/TMBIM6/TGFB1/FCRL3/NDFIP1	negative regulation of production of molecular mediator of immune response	38	0.430932	1.42894	0.0355405	0.968231	0.968231	2981	tags=39%, list=16%, signal=33%	HFE/SLAMF1/BST2/TGFB1/CD96/FCGR2B/IL13RA2/JAK3/CR1/ACP5/LILRB1/LILRB4/SMAD7/IRAK3/PARP3	0.0355405	0.38447	p0_0.035540531702162	p1_0.384469696969697
GO:0002702	positive regulation of production of molecular mediator of immune response	110	-0.44197	-1.52342	0.00717543	0.106506	0.0941173	2027	tags=26%, list=10%, signal=24%	ARID5A/LACC1/FFAR3/TLR7/BTK/TNFRSF4/CARD9/RSAD2/KLK7/IL33/CD28/TLR9/LAPTM5/PTPRC/SLC7A5/HLA-F/GPRC5B/IL13/IRF5/CD244/DNAJB9/TLR4/IL18R1/NLRP3/KLK5/GATA3/NOD2/IL6/IL1B	positive regulation of production of molecular mediator of immune response	122	0.304546	1.17317	0.171875	0.676405	0.630099	3759	tags=24%, list=18%, signal=19%	LAPTM5/IL33/DENND1B/TGFB1/MYD88/FFAR2/DDX21/MAPKAPK2/F2RL1/IL17A/SCIMP/CD160/SEMA7A/STAT6/TNFSF4/CLCF1/CD81/MLH1/IL17F/FFAR3/NOD1/CD226/MSH2/RBP4/CD74/TBX21/GPRC5B/CD28/HPX	positive regulation of production of molecular mediator of immune response	117	-0.200953	-0.607612	0.982103	1	1	2563	tags=20%, list=14%, signal=17%	CD36/RAET1G/RBP4/TLR7/NOD2/IL10/IL33/KIR2DL4/TICAM2/IL18/ARID5A/CLEC7A/NR4A3/KIT/SLC7A5/CD244/TNFSF13/SYK/FZD5/WNT5A/SPON2/IL6/PGC	0.00717543	0.982103	p3_0.00717543312856054	p0_0.982102908277405
GO:0002703	regulation of leukocyte mediated immunity	203	-0.423402	-1.56893	0.000309482	0.0111811	0.00988058	4264	tags=40%, list=21%, signal=32%	SERPINB9/TLR3/TGFB1/HLA-G/MICA/IL4R/MICB/HLA-A/CD46/CX3CR1/LAMP1/HLA-H/SMAD7/PRKCZ/PLA2G3/F2RL1/TNFSF4/TYROBP/KLRK1/IL27RA/FOXP3/ADORA2B/CD55/CCR2/GATA1/SASH3/SYK/TREM2/GAB2/HLA-B/PRAM1/HLA-C/PVR/ULBP2/ARID5A/TNF/BTK/CR1/LGALS9/CD80/LTA/STXBP2/RSAD2/SPN/UNC13D/KLRC1/LYN/IL4I1/ULBP1/CD28/C4BPA/TLR9/IL20RB/SVEP1/IFNB1/NCR3/PTPRC/KLRD1/ITGB2/CR1L/VAV1/HLA-F/FGR/IL13/IL18RAP/RASGRP1/C4BPB/TLR4/IL18R1…	regulation of leukocyte mediated immunity	226	0.28139	1.17116	0.112605	0.593002	0.552406	3923	tags=21%, list=19%, signal=17%	RAC2/SERPINB9/STXBP2/DENND1B/IL27RA/MR1/TGFB1/CD1A/RIPK3/FES/DDX21/F2RL1/FOXJ1/ULBP2/NDFIP1/NCR3/SCIMP/CD1C/CRTAM/PLA2G3/CD160/TAP2/STAT6/NOS2/TNFSF4/CLCF1/CD81/MLH1/HSPD1/IL18RAP/HMGB1/SLC15A4/CD226/MSH2/SLAMF6/PARP3/CCR2/IL12A/TBX21/PTAFR/RAET1E/CD28/HAVCR2/HFE/NCR1/HPX/FBXO38/SH2D1A	regulation of leukocyte mediated immunity	205	0.313549	1.421	0.00479426	0.407899	0.407899	3609	tags=35%, list=20%, signal=28%	RAET1E/TREM2/F2RL1/CD1E/HFE/SLAMF1/PTPN6/IL27RA/IL7R/CD226/SLAMF6/GATA3/CD300A/CD28/LGALS9/TLR4/ULBP2/CCR2/BST2/HLA-DRA/TGFB1/KMT5C/CD96/PRKCZ/KLRB1/FCGR2B/DNASE1L3/IL13RA2/JAK3/NSD2/FGR/CR1/WAS/LILRB1/NECTIN2/IL18R1/IL1R1/MSH2/CRTAM/HLA-DRB1/PMS2/CEACAM1/LILRB4/BTK/SERPINB9/P2RX7/ADGRE2/SMAD7/LAG3/IL23A/TRAF2/SHLD3/FCGR1A/B2M/HLA-C/PARP3/MICB/BCR/KLRC4/SHLD1/CD55/HLA-A/PAXIP1/HLA-B/CRK/HLA-E/LYN…	0.000309482	0.112605	p3_0.000309482150530573	p1_0.112605042016807
GO:0002704	negative regulation of leukocyte mediated immunity	58	-0.515196	-1.60387	0.00975882	0.126631	0.111902	4873	tags=57%, list=24%, signal=43%	AHR/BCL6/CD96/IL13RA2/SERPINB9/TGFB1/HLA-G/MICA/HLA-A/CD46/CX3CR1/SMAD7/FOXP3/CCR2/HLA-B/CR1/LGALS9/CD80/SPN/KLRC1/IL4I1/C4BPA/IL20RB/SVEP1/IFNB1/PTPRC/KLRD1/CR1L/HLA-F/C4BPB/BST2/NOD2/CEACAM1	negative regulation of leukocyte mediated immunity	67	0.182368	0.639334	0.981034	0.993853	0.925815	3682	tags=13%, list=18%, signal=11%	SERPINB9/TGFB1/FOXJ1/NDFIP1/PARP3/CCR2/TBX21/HAVCR2/HFE	negative regulation of leukocyte mediated immunity	61	0.350503	1.32281	0.0695186	1	1	3564	tags=43%, list=20%, signal=34%	HFE/SLAMF1/PTPN6/IL7R/CD300A/LGALS9/CCR2/BST2/TGFB1/CD96/FCGR2B/IL13RA2/JAK3/CR1/LILRB1/CEACAM1/LILRB4/SERPINB9/SMAD7/PARP3/BCR/HLA-A/HLA-B/CRK/HLA-E/PTPRC	0.00975882	0.981034	p3_0.00975882024655375	p1_0.981034482758621
GO:0002705	positive regulation of leukocyte mediated immunity	118	-0.403358	-1.40974	0.017222	0.168892	0.149248	4196	tags=38%, list=21%, signal=30%	TGFB1/HLA-G/MICA/MICB/HLA-A/LAMP1/HLA-H/PRKCZ/F2RL1/TNFSF4/TYROBP/KLRK1/FOXP3/CD55/SASH3/TREM2/HLA-B/HLA-C/PVR/ULBP2/ARID5A/TNF/BTK/LTA/RSAD2/KLRC1/ULBP1/CD28/NCR3/PTPRC/KLRD1/ITGB2/VAV1/HLA-F/IL18RAP/RASGRP1/IL18R1/NLRP3/CD1D/GATA3/IL23A/C3/NOD2/IL6/IL1B	positive regulation of leukocyte mediated immunity	132	0.301623	1.17473	0.147314	0.652309	0.607653	3923	tags=25%, list=19%, signal=20%	DENND1B/MR1/TGFB1/CD1A/DDX21/F2RL1/ULBP2/NCR3/SCIMP/CD1C/CRTAM/CD160/TAP2/STAT6/NOS2/TNFSF4/CLCF1/CD81/MLH1/HSPD1/IL18RAP/CD226/MSH2/SLAMF6/IL12A/TBX21/PTAFR/RAET1E/CD28/HFE/HPX/FBXO38/SH2D1A	positive regulation of leukocyte mediated immunity	124	0.330846	1.38537	0.0170717	0.714472	0.714472	3609	tags=35%, list=20%, signal=28%	RAET1E/TREM2/F2RL1/CD1E/HFE/SLAMF1/CD226/SLAMF6/GATA3/CD28/ULBP2/HLA-DRA/TGFB1/KMT5C/PRKCZ/NSD2/NECTIN2/IL18R1/IL1R1/MSH2/CRTAM/HLA-DRB1/PMS2/BTK/P2RX7/LAG3/IL23A/TRAF2/SHLD3/FCGR1A/B2M/HLA-C/MICB/KLRC4/SHLD1/CD55/HLA-A/PAXIP1/HLA-B/HLA-E/NLRP3/PTPRC/IL23R	0.0170717	0.147314	p0_0.0170716702256064	p1_0.147313691507799
GO:0002706	regulation of lymphocyte mediated immunity	147	-0.39718	-1.42183	0.0144494	0.156578	0.138365	1875	tags=40%, list=9%, signal=37%	SERPINB9/TGFB1/HLA-G/MICA/MICB/HLA-A/CD46/LAMP1/HLA-H/SMAD7/PRKCZ/TNFSF4/KLRK1/IL27RA/FOXP3/CD55/CCR2/SASH3/TREM2/HLA-B/HLA-C/PVR/ULBP2/ARID5A/TNF/BTK/CR1/LGALS9/CD80/LTA/RSAD2/SPN/KLRC1/IL4I1/ULBP1/CD28/C4BPA/IL20RB/SVEP1/IFNB1/NCR3/PTPRC/KLRD1/CR1L/VAV1/HLA-F/IL18RAP/RASGRP1/C4BPB/IL18R1/NLRP3/CD1D/GATA3/IL23A/C3/NOD2/CEACAM1/IL6/IL1B	regulation of lymphocyte mediated immunity	170	0.282374	1.13607	0.18638	0.687179	0.640135	3923	tags=23%, list=19%, signal=19%	SERPINB9/DENND1B/IL27RA/MR1/TGFB1/CD1A/RIPK3/FOXJ1/ULBP2/NDFIP1/NCR3/CD1C/CRTAM/CD160/TAP2/STAT6/TNFSF4/CLCF1/CD81/MLH1/HSPD1/IL18RAP/HMGB1/SLC15A4/CD226/MSH2/SLAMF6/PARP3/CCR2/IL12A/TBX21/RAET1E/CD28/HAVCR2/HFE/NCR1/HPX/FBXO38/SH2D1A	regulation of lymphocyte mediated immunity	152	0.354249	1.52641	0.00238559	0.264907	0.264907	3609	tags=39%, list=20%, signal=32%	RAET1E/TREM2/CD1E/HFE/SLAMF1/PTPN6/IL27RA/IL7R/CD226/SLAMF6/GATA3/CD28/LGALS9/ULBP2/CCR2/HLA-DRA/TGFB1/KMT5C/CD96/PRKCZ/KLRB1/FCGR2B/NSD2/CR1/WAS/LILRB1/NECTIN2/IL18R1/IL1R1/MSH2/CRTAM/HLA-DRB1/PMS2/CEACAM1/LILRB4/BTK/SERPINB9/P2RX7/SMAD7/LAG3/IL23A/TRAF2/SHLD3/FCGR1A/B2M/HLA-C/PARP3/MICB/KLRC4/SHLD1/CD55/HLA-A/PAXIP1/HLA-B/CRK/HLA-E/NLRP3/PTPRC/PIK3R6/IL23R	0.00238559	0.18638	p0_0.0023855885901716	p1_0.186379928315412
GO:0002707	negative regulation of lymphocyte mediated immunity	47	-0.547138	-1.64213	0.00680589	0.103531	0.0914889	1805	tags=62%, list=9%, signal=56%	AHR/BCL6/CD96/SERPINB9/TGFB1/HLA-G/MICA/HLA-A/CD46/SMAD7/FOXP3/HLA-B/CR1/LGALS9/CD80/SPN/KLRC1/IL4I1/C4BPA/IL20RB/SVEP1/IFNB1/PTPRC/KLRD1/CR1L/HLA-F/C4BPB/NOD2/CEACAM1	negative regulation of lymphocyte mediated immunity	56	0.219002	0.743799	0.90669	0.97868	0.911681	1268	tags=7%, list=6%, signal=7%	SERPINB9/TGFB1/FOXJ1/NDFIP1	negative regulation of lymphocyte mediated immunity	50	0.3299	1.18785	0.186275	1	1	3757	tags=42%, list=21%, signal=33%	HFE/SLAMF1/PTPN6/IL7R/LGALS9/TGFB1/CD96/FCGR2B/CR1/LILRB1/CEACAM1/LILRB4/SERPINB9/SMAD7/PARP3/HLA-A/HLA-B/CRK/HLA-E/PTPRC/CR1L	0.00680589	0.90669	p3_0.0068058908712534	p1_0.90669014084507
GO:0002708	positive regulation of lymphocyte mediated immunity	100	-0.425971	-1.44912	0.0168997	0.167404	0.147932	4196	tags=42%, list=21%, signal=33%	TGFB1/HLA-G/MICA/MICB/HLA-A/LAMP1/HLA-H/PRKCZ/TNFSF4/KLRK1/FOXP3/CD55/SASH3/TREM2/HLA-B/HLA-C/PVR/ULBP2/ARID5A/TNF/BTK/LTA/RSAD2/KLRC1/ULBP1/CD28/NCR3/PTPRC/KLRD1/VAV1/HLA-F/IL18RAP/RASGRP1/IL18R1/NLRP3/CD1D/GATA3/IL23A/C3/NOD2/IL6/IL1B	positive regulation of lymphocyte mediated immunity	112	0.286843	1.09062	0.295139	0.770883	0.71811	3923	tags=25%, list=19%, signal=20%	DENND1B/MR1/TGFB1/CD1A/ULBP2/NCR3/CD1C/CRTAM/CD160/TAP2/STAT6/TNFSF4/CLCF1/CD81/MLH1/HSPD1/IL18RAP/CD226/MSH2/SLAMF6/IL12A/TBX21/RAET1E/CD28/HFE/HPX/FBXO38/SH2D1A	positive regulation of lymphocyte mediated immunity	104	0.379595	1.55732	0.00214313	0.251809	0.251809	3609	tags=40%, list=20%, signal=33%	RAET1E/TREM2/CD1E/HFE/SLAMF1/CD226/SLAMF6/GATA3/CD28/ULBP2/HLA-DRA/TGFB1/KMT5C/PRKCZ/NSD2/NECTIN2/IL18R1/IL1R1/MSH2/CRTAM/HLA-DRB1/PMS2/BTK/P2RX7/LAG3/IL23A/TRAF2/SHLD3/FCGR1A/B2M/HLA-C/MICB/KLRC4/SHLD1/CD55/HLA-A/PAXIP1/HLA-B/HLA-E/NLRP3/PTPRC/IL23R	0.00214313	0.295139	p0_0.00214312895505582	p1_0.295138888888889
GO:0002709	regulation of T cell mediated immunity	81	-0.46165	-1.51084	0.0146385	0.157213	0.138926	4166	tags=46%, list=21%, signal=36%	HLA-G/MICA/MICB/HLA-A/HLA-H/SMAD7/PRKCZ/TNFSF4/FOXP3/CD55/CCR2/SASH3/HLA-B/HLA-C/PVR/ULBP2/ARID5A/CD80/RSAD2/SPN/KLRC1/IL4I1/ULBP1/IL20RB/IFNB1/PTPRC/KLRD1/HLA-F/IL18R1/NLRP3/CD1D/GATA3/IL23A/NOD2/CEACAM1/IL6/IL1B	regulation of T cell mediated immunity	92	0.223532	0.829273	0.833333	0.966142	0.900001	3906	tags=18%, list=19%, signal=15%	DENND1B/MR1/CD1A/RIPK3/ULBP2/CD1C/TAP2/TNFSF4/CD81/HSPD1/HMGB1/CCR2/IL12A/TBX21/RAET1E/HFE/FBXO38	regulation of T cell mediated immunity	82	0.345971	1.38024	0.0425696	1	1	3609	tags=40%, list=20%, signal=32%	RAET1E/CD1E/HFE/SLAMF1/IL7R/GATA3/ULBP2/CCR2/HLA-DRA/PRKCZ/FCGR2B/WAS/LILRB1/NECTIN2/IL18R1/IL1R1/HLA-DRB1/CEACAM1/LILRB4/P2RX7/SMAD7/IL23A/TRAF2/B2M/HLA-C/MICB/CD55/HLA-A/HLA-B/HLA-E/NLRP3/PTPRC/IL23R	0.0146385	0.833333	p3_0.0146385386991655	p1_0.833333333333333
GO:0002710	negative regulation of T cell mediated immunity	22	-0.714363	-1.87921	0.00127334	0.0338851	0.0299438	1761	tags=50%, list=9%, signal=46%	CD80/SPN/KLRC1/IL4I1/IL20RB/IFNB1/PTPRC/KLRD1/HLA-F/NOD2/CEACAM1	negative regulation of T cell mediated immunity	29	-0.348626	-1.05996	0.363441	0.810826	0.755318	7993	tags=62%, list=38%, signal=38%	FOXP3/KLRC1/NCKAP1L/SLAMF1/SMAD7/IL4I1/IFNB1/IL20RB/CD80/IFNA2/HLA-F/HLA-G/AHR/SPN/PPP3CB/XCL1/CEACAM1/FCGR2B	negative regulation of T cell mediated immunity	26	0.356993	1.09156	0.317857	1	1	2611	tags=31%, list=14%, signal=26%	HFE/SLAMF1/IL7R/FCGR2B/LILRB1/CEACAM1/LILRB4/SMAD7	0.00127334	0.363441	p3_0.00127333879365671	p1_0.363440860215054
GO:0002711	positive regulation of T cell mediated immunity	58	-0.442467	-1.37745	0.0524412	0.313673	0.277188	4166	tags=45%, list=21%, signal=36%	HLA-G/MICA/MICB/HLA-A/HLA-H/PRKCZ/TNFSF4/FOXP3/CD55/SASH3/HLA-B/HLA-C/PVR/ULBP2/ARID5A/RSAD2/ULBP1/PTPRC/HLA-F/IL18R1/NLRP3/CD1D/GATA3/IL23A/IL6/IL1B	positive regulation of T cell mediated immunity	62	0.2943	1.02205	0.430034	0.842296	0.784634	3906	tags=22%, list=19%, signal=18%	DENND1B/MR1/CD1A/ULBP2/CD1C/TAP2/TNFSF4/CD81/HSPD1/IL12A/TBX21/RAET1E/HFE/FBXO38	positive regulation of T cell mediated immunity	56	0.401987	1.47626	0.0178207	0.728349	0.728349	3609	tags=45%, list=20%, signal=36%	RAET1E/CD1E/HFE/SLAMF1/GATA3/ULBP2/HLA-DRA/PRKCZ/NECTIN2/IL18R1/IL1R1/HLA-DRB1/P2RX7/IL23A/TRAF2/B2M/HLA-C/MICB/CD55/HLA-A/HLA-B/HLA-E/NLRP3/PTPRC/IL23R	0.0178207	0.430034	p0_0.0178206698889622	p1_0.430034129692833
GO:0002712	regulation of B cell mediated immunity	49	-0.415796	-1.26892	0.121157	0.436662	0.385871	1875	tags=49%, list=9%, signal=45%	IL4/HLA-E/TFRC/BCL6/APLF/SLC15A4/TGFB1/CD46/TNFSF4/IL27RA/FOXP3/TREM2/TNF/BTK/CR1/LTA/CD28/C4BPA/SVEP1/PTPRC/CR1L/C4BPB/C3/NOD2	regulation of B cell mediated immunity	54	0.282136	0.949979	0.538324	0.889319	0.828437	3759	tags=28%, list=18%, signal=23%	IL27RA/TGFB1/FOXJ1/NDFIP1/STAT6/TNFSF4/CLCF1/MLH1/SLC15A4/CD226/MSH2/PARP3/TBX21/CD28/HPX	regulation of B cell mediated immunity	53	0.368274	1.35782	0.0999767	1	1	3757	tags=42%, list=21%, signal=33%	TREM2/PTPN6/IL27RA/CD226/CD28/TGFB1/KMT5C/FCGR2B/NSD2/CR1/NECTIN2/MSH2/PMS2/BTK/SHLD3/FCGR1A/PARP3/SHLD1/PAXIP1/HLA-E/PTPRC/CR1L	0.0999767	0.538324	p0_0.0999767334947721	p1_0.538324420677362
GO:0002713	negative regulation of B cell mediated immunity	13	-0.500592	-1.16109	0.274286	0.617202	0.545412	1805	tags=62%, list=9%, signal=56%	BCL6/CD46/FOXP3/CR1/C4BPA/SVEP1/CR1L/C4BPB	negative regulation of B cell mediated immunity	15	0.311621	0.78921	0.761194	0.956841	0.891337	3056	tags=20%, list=15%, signal=17%	FOXJ1/NDFIP1/PARP3	negative regulation of B cell mediated immunity	12	-0.372287	-0.793122	0.711009	1	1	775	tags=17%, list=4%, signal=16%	C4BPA/SVEP1	0.274286	0.761194	p3_0.274285714285714	p1_0.761194029850746
GO:0002714	positive regulation of B cell mediated immunity	31	-0.454873	-1.28053	0.138632	0.460382	0.406832	1875	tags=23%, list=9%, signal=21%	TNF/BTK/LTA/CD28/PTPRC/C3/NOD2	positive regulation of B cell mediated immunity	34	-0.287769	-0.89916	0.633987	0.917906	0.855067	2855	tags=21%, list=14%, signal=18%	TP53BP1/IL4/C3/XCL1/FCER2/PMS2/TFRC	positive regulation of B cell mediated immunity	36	0.43564	1.42372	0.041011	1	1	3564	tags=44%, list=20%, signal=36%	TREM2/CD226/CD28/TGFB1/KMT5C/NSD2/NECTIN2/MSH2/PMS2/BTK/SHLD3/FCGR1A/SHLD1/PAXIP1/HLA-E/PTPRC	0.041011	0.633987	p0_0.0410109782468947	p1_0.633986928104575
GO:0002715	regulation of natural killer cell mediated immunity	41	-0.333969	-0.981399	0.485876	0.768282	0.678919	4264	tags=44%, list=21%, signal=35%	SERPINB9/TGFB1/HLA-G/MICA/HLA-A/LAMP1/KLRK1/HLA-B/PVR/LGALS9/KLRC1/NCR3/KLRD1/VAV1/HLA-F/IL18RAP/RASGRP1/CEACAM1	regulation of natural killer cell mediated immunity	48	0.397885	1.30846	0.107011	0.583972	0.543994	3923	tags=27%, list=19%, signal=22%	SERPINB9/TGFB1/NCR3/CRTAM/CD160/IL18RAP/CD226/SLAMF6/IL12A/RAET1E/HAVCR2/NCR1/SH2D1A	regulation of natural killer cell mediated immunity	41	0.478407	1.63866	0.0102598	0.585553	0.585553	3602	tags=46%, list=20%, signal=37%	RAET1E/CD226/SLAMF6/LGALS9/TGFB1/CD96/KLRB1/LILRB1/NECTIN2/CRTAM/CEACAM1/SERPINB9/LAG3/KLRC4/HLA-A/HLA-B/CRK/HLA-E/PIK3R6	0.0102598	0.485876	p0_0.0102597930501396	p3_0.485875706214689
GO:0002716	negative regulation of natural killer cell mediated immunity	19	-0.560519	-1.42185	0.0842912	0.372196	0.328904	4591	tags=63%, list=23%, signal=49%	CD96/SERPINB9/TGFB1/HLA-G/MICA/HLA-A/HLA-B/LGALS9/KLRC1/KLRD1/HLA-F/CEACAM1	negative regulation of natural killer cell mediated immunity	20	0.422367	1.1444	0.286245	0.764238	0.71192	493	tags=10%, list=2%, signal=9%	SERPINB9/TGFB1	negative regulation of natural killer cell mediated immunity	19	0.489399	1.3836	0.0993151	1	1	4611	tags=63%, list=25%, signal=47%	LGALS9/TGFB1/CD96/LILRB1/CEACAM1/SERPINB9/HLA-A/HLA-B/CRK/HLA-E/MICA/ARRB2	0.0842912	0.286245	p3_0.0842911877394636	p1_0.286245353159851
GO:0002717	positive regulation of natural killer cell mediated immunity	25	-0.335069	-0.8984	0.601923	0.839428	0.741789	1573	tags=32%, list=8%, signal=30%	PVR/KLRC1/NCR3/KLRD1/VAV1/HLA-F/IL18RAP/RASGRP1	positive regulation of natural killer cell mediated immunity	30	0.397612	1.1684	0.227778	0.718089	0.668929	3923	tags=30%, list=19%, signal=24%	NCR3/CRTAM/CD160/IL18RAP/CD226/SLAMF6/IL12A/RAET1E/SH2D1A	positive regulation of natural killer cell mediated immunity	26	0.373338	1.14154	0.260714	1	1	3477	tags=31%, list=19%, signal=25%	RAET1E/CD226/SLAMF6/NECTIN2/CRTAM/LAG3/KLRC4/HLA-E	0.227778	0.601923	p1_0.227777777777778	p3_0.601923076923077
GO:0002718	regulation of cytokine production involved in immune response	104	-0.447167	-1.53295	0.00832168	0.116224	0.102706	4231	tags=39%, list=21%, signal=31%	TLR3/MIF/TGFB1/HLA-G/HLA-A/LITAF/SMAD7/PRKCZ/F2RL1/TNFSF4/RIPK2/FOXP3/CD55/CCR2/SASH3/SYK/ARID5A/LACC1/FFAR3/TNF/TLR7/BTK/CARD9/RSAD2/TLR9/LAPTM5/IFNB1/TGFB2/SLC7A5/HLA-F/GPRC5B/IRF5/TLR4/IL18R1/NLRP3/BST2/GATA3/APOA1/NOD2/IL6/IL1B	regulation of cytokine production involved in immune response	114	0.267245	1.02116	0.419411	0.83603	0.778797	3682	tags=18%, list=18%, signal=15%	LAPTM5/DENND1B/TGFB1/MYD88/FFAR2/DDX21/MAPKAPK2/F2RL1/SCIMP/CD160/SEMA7A/TNFSF4/CD81/FFAR3/NOD1/CD226/CCR2/CD74/TBX21/GPRC5B/HFE	regulation of cytokine production involved in immune response	107	0.256295	1.06678	0.290598	1	1	2922	tags=25%, list=16%, signal=21%	F2RL1/HFE/SLAMF1/CD226/GATA3/TLR4/CCR2/BST2/CARD9/TGFB1/CD96/PRKCZ/JAK3/ACP5/CD74/LILRB1/IL18R1/IL1R1/TNFRSF14/LAPTM5/LILRB4/BTK/P2RX7/SMAD7/TRAF2/IRAK3/B2M	0.00832168	0.419411	p3_0.00832167743819278	p1_0.419410745233969
GO:0002719	negative regulation of cytokine production involved in immune response	27	-0.501193	-1.36581	0.0900563	0.384504	0.33978	1025	tags=26%, list=5%, signal=25%	TNF/IFNB1/TGFB2/HLA-F/BST2/APOA1/NOD2	negative regulation of cytokine production involved in immune response	34	-0.242071	-0.756375	0.847495	0.967043	0.900841	7993	tags=53%, list=38%, signal=33%	FOXP3/SLAMF1/SMAD7/APOA1/NLRX1/TWIST1/APOA2/IFNB1/TGFB3/IL10/ANGPT1/IFNA2/HLA-F/CUEDC2/BCL6/AXL/XCL1/PRG2	negative regulation of cytokine production involved in immune response	28	0.486077	1.49905	0.0254071	0.848768	0.848768	2857	tags=39%, list=16%, signal=33%	HFE/SLAMF1/BST2/TGFB1/CD96/JAK3/ACP5/LILRB1/LILRB4/SMAD7/IRAK3	0.0254071	0.847495	p0_0.0254071269403442	p1_0.847494553376906
GO:0002720	positive regulation of cytokine production involved in immune response	72	-0.473911	-1.53011	0.0151452	0.157902	0.139535	2027	tags=40%, list=10%, signal=36%	TLR3/MIF/HLA-G/HLA-A/PRKCZ/F2RL1/TNFSF4/RIPK2/CD55/SASH3/SYK/ARID5A/LACC1/FFAR3/TLR7/CARD9/RSAD2/LAPTM5/SLC7A5/HLA-F/GPRC5B/IRF5/TLR4/IL18R1/NLRP3/GATA3/NOD2/IL6/IL1B	positive regulation of cytokine production involved in immune response	76	0.334045	1.20051	0.156089	0.66486	0.619345	3618	tags=23%, list=17%, signal=19%	LAPTM5/DENND1B/MYD88/FFAR2/DDX21/MAPKAPK2/F2RL1/SCIMP/CD160/SEMA7A/TNFSF4/CD81/FFAR3/NOD1/CD226/CD74/TBX21/GPRC5B	positive regulation of cytokine production involved in immune response	77	-0.2284	-0.662382	0.91784	1	1	2563	tags=17%, list=14%, signal=15%	KIR2DL4/TICAM2/IL18/ARID5A/CLEC7A/NR4A3/KIT/SLC7A5/SYK/FZD5/WNT5A/SPON2/IL6	0.0151452	0.91784	p3_0.0151452102948662	p0_0.917840375586854
GO:0002724	regulation of T cell cytokine production	32	-0.651734	-1.83918	0.00345073	0.0680854	0.060166	4082	tags=53%, list=20%, signal=42%	HLA-A/SMAD7/PRKCZ/TNFSF4/FOXP3/CD55/CCR2/SASH3/ARID5A/RSAD2/IFNB1/HLA-F/IL18R1/NLRP3/GATA3/IL6/IL1B	regulation of T cell cytokine production	37	0.209667	0.653504	0.95471	0.990488	0.92268	3682	tags=16%, list=18%, signal=13%	DENND1B/TNFSF4/CD81/CCR2/TBX21/HFE	regulation of T cell cytokine production	33	0.331586	1.06188	0.327801	1	1	3535	tags=42%, list=20%, signal=34%	HFE/SLAMF1/GATA3/CCR2/PRKCZ/IL18R1/IL1R1/LILRB4/SMAD7/TRAF2/B2M/CD55/HLA-A/NLRP3	0.00345073	0.95471	p3_0.00345072906592753	p1_0.954710144927536
GO:0002725	negative regulation of T cell cytokine production	6	-0.747331	-1.43997	0.0702811	0.344454	0.304388	3836	tags=67%, list=19%, signal=54%	SMAD7/FOXP3/IFNB1/HLA-F	negative regulation of T cell cytokine production	11	-0.246446	-0.579325	0.940299	0.98582	0.918332	7993	tags=64%, list=38%, signal=39%	FOXP3/SLAMF1/SMAD7/IFNB1/IFNA2/HLA-F/XCL1	negative regulation of T cell cytokine production	8	0.596387	1.32191	0.164384	1	1	2611	tags=50%, list=14%, signal=43%	HFE/SLAMF1/LILRB4/SMAD7	0.0702811	0.940299	p3_0.070281124497992	p1_0.940298507462687
GO:0002726	positive regulation of T cell cytokine production	24	-0.662633	-1.77225	0.00483536	0.0839932	0.0742235	4082	tags=50%, list=20%, signal=40%	HLA-A/PRKCZ/TNFSF4/CD55/SASH3/ARID5A/RSAD2/IL18R1/NLRP3/GATA3/IL6/IL1B	positive regulation of T cell cytokine production	25	-0.225523	-0.654098	0.942605	0.986897	0.919335	4233	tags=31%, list=20%, signal=25%	IL18/IL6/IL6/MAP3K7/IL4/FZD5/TRAF6/XCL1	positive regulation of T cell cytokine production	25	0.271415	0.82064	0.737226	1	1	3535	tags=40%, list=20%, signal=32%	SLAMF1/GATA3/PRKCZ/IL18R1/IL1R1/TRAF2/B2M/CD55/HLA-A/NLRP3	0.00483536	0.942605	p3_0.00483536070081613	p1_0.942604856512141
GO:0002730	regulation of dendritic cell cytokine production	15	-0.600534	-1.42909	0.0851064	0.372856	0.329487	1113	tags=27%, list=6%, signal=25%	TLR9/TLR4/BST2/NOD2	regulation of dendritic cell cytokine production	15	0.311364	0.78856	0.761194	0.956841	0.891337	1293	tags=13%, list=6%, signal=13%	DDX21/SCIMP	regulation of dendritic cell cytokine production	15	0.315216	0.84405	0.665644	1	1	1446	tags=20%, list=8%, signal=18%	TLR4/BST2/JAK3	0.0851064	0.761194	p3_0.0851063829787234	p1_0.761194029850746
GO:0002732	positive regulation of dendritic cell cytokine production	10	-0.437793	-0.949619	0.533066	0.793953	0.701604	115	tags=20%, list=1%, signal=20%	TICAM1/NOD2	positive regulation of dendritic cell cytokine production	10	0.395101	0.90075	0.604915	0.912787	0.850299	1293	tags=20%, list=6%, signal=19%	DDX21/SCIMP	positive regulation of dendritic cell cytokine production	11	-0.569536	-1.19448	0.269051	1	1	3633	tags=45%, list=20%, signal=36%	DDX1/NOD2/TICAM2/CLEC7A/KIT	0.269051	0.604915	p0_0.26905132192846	p1_0.604914933837429
GO:0002752	cell surface pattern recognition receptor signaling pathway	63	-0.44746	-1.4168	0.0482493	0.310008	0.273949	4392	tags=37%, list=22%, signal=29%	IRAK2/NAGLU/TAX1BP1/NINJ1/F2RL1/TRAF3/RIPK2/LY96/TREM2/COLEC10/IFI35/PIK3AP1/PELI1/SQSTM1/NFKBIA/OAS1/LYN/TNFAIP3/COLEC11/LTF/TLR4/CD14/NOD2	cell surface pattern recognition receptor signaling pathway	70	0.287077	1.01202	0.448336	0.846956	0.788975	1660	tags=14%, list=8%, signal=13%	TLR1/PTPN22/MYD88/FFAR2/F2RL1/LY96/FCN2/SCIMP/TNIP2/TLR5	cell surface pattern recognition receptor signaling pathway	68	0.244109	0.934093	0.607362	1	1	3708	tags=29%, list=20%, signal=23%	COLEC11/TREM2/TNIP3/F2RL1/TNFAIP3/TLR4/OAS1/PTPN22/TRAF3/LY96/PRKCE/TLR5/PELI1/TNIP2/APPL2/CYBA/TIRAP/LYN/TLR6/FFAR2	0.0482493	0.607362	p3_0.0482493354610978	p0_0.607361963190184
GO:0002753	cytoplasmic pattern recognition receptor signaling pathway	141	-0.312699	-1.11505	0.2358	0.579613	0.512195	5166	tags=31%, list=26%, signal=23%	NLRP1/NEK7/ALPK1/OAS3/GBP2/RIOK3/TSPAN6/HSPA1A/MARK4/TRIM11/SLC15A4/TLR3/TAX1BP1/HSPA1B/F2RL1/SLC15A2/NR1H4/RIPK2/TIFA/UNC93B1/BIRC3/TREM2/DDX60/DHX58/PIK3AP1/PELI1/NFKBIA/LACC1/TNF/TLR7/IFIH1/BTK/RSAD2/TREML4/OASL/OAS1/TNFAIP3/SLC15A3/TLR9/IRF7/GBP5/TLR4/NLRP3/NOD2	cytoplasmic pattern recognition receptor signaling pathway	149	0.221087	0.872419	0.766143	0.957601	0.892045	4320	tags=26%, list=21%, signal=20%	PTPN22/SIRT2/NAGK/HCFC2/MYD88/AURKB/UNC93B1/FCRL3/ITCH/F2RL1/TSPAN6/SCIMP/TNIP2/CLPB/TREX1/NLRC3/GRAMD4/RAB7B/C1QBP/HMGB1/SLC15A4/NOD1/TIRAP/SLC46A2/OTULIN/USP15/ZNRF4/BANF1/HAVCR2/PPP2CA/PARP1/TRIM15/RTN4/HSPA8/DDX3X/MAVS/WDFY1/ZDHHC12	cytoplasmic pattern recognition receptor signaling pathway	144	0.253786	1.09237	0.263158	1	1	4951	tags=33%, list=27%, signal=24%	TREM2/F2RL1/OAS3/TNFAIP3/HSPA1B/TLR4/NLRC3/OAS1/GBP5/OASL/LILRA4/IRF7/DHX58/ALPK1/NOP53/PTPN22/RFTN1/BTK/BIRC3/TSPAN6/TIFA/DDX60/PELI1/PRKD1/TRAF3IP3/TNIP2/CGAS/UNC93B1/TIRAP/NLRP3/TLR6/INAVA/IRGM/NLRP1/COLEC12/CPTP/LYPLAL1/RELA/IFIH1/IRF3/STMP1/TNF/PLCG2/DHX33/NOD1/SRC/ZDHHC18	0.2358	0.766143	p3_0.235800344234079	p1_0.766143106457243
GO:0002755	MyD88-dependent toll-like receptor signaling pathway	18	-0.675047	-1.69238	0.02123	0.192588	0.170187	2689	tags=33%, list=13%, signal=29%	IRF1/TNIP1/BTK/TLR9/IRF7/TLR4	MyD88-dependent toll-like receptor signaling pathway	20	-0.427535	-1.17884	0.219828	0.708717	0.6602	3577	tags=40%, list=17%, signal=33%	TLR9/IRF7/MAP3K7/TRAF6/IKBKB/IRAK2/CD300LF/TNIP1	MyD88-dependent toll-like receptor signaling pathway	18	0.462132	1.27185	0.164336	1	1	3635	tags=39%, list=20%, signal=31%	CD300A/TLR4/IRF7/BTK/IRAK3/TIRAP/TLR6	0.02123	0.219828	p3_0.0212300274507564	p1_0.219827586206897
GO:0002756	MyD88-independent toll-like receptor signaling pathway	15	-0.37073	-0.882223	0.60735	0.842584	0.744579	1101	tags=33%, list=5%, signal=32%	TNIP3/SARM1/TRAF3/IRF7/TLR4	MyD88-independent toll-like receptor signaling pathway	15	-0.632031	-1.62238	0.0219917	0.244564	0.227821	3577	tags=47%, list=17%, signal=39%	IRF7/TICAM1/MAP3K7/TRAF6/IKBKB/CD300LF/CD274	MyD88-independent toll-like receptor signaling pathway	16	0.578075	1.56899	0.0415306	1	1	2390	tags=38%, list=13%, signal=33%	TNIP3/TLR4/IRF7/SARM1/TRAF3/PRKCE	0.0219917	0.60735	p1_0.0219917017650812	p3_0.607350096711799
GO:0002758	innate immune response-activating signaling pathway	227	-0.312273	-1.18053	0.122349	0.437472	0.386587	3718	tags=32%, list=18%, signal=27%	NLRP1/NEK7/ALPK1/OAS3/GBP2/RIOK3/TSPAN6/HSPA1A/MARK4/DAB2IP/NFKBIL1/SARM1/TRIM11/SLC15A4/IRAK2/TLR3/NAGLU/GPR108/TAX1BP1/HSPA1B/NINJ1/F2RL1/TRAF3/SLC15A2/NR1H4/TYROBP/CTSS/RIPK2/KLRK1/TIFA/UNC93B1/LY96/BIRC3/SYK/TREM2/IRF1/COLEC10/DDX60/DHX58/IFI35/TLR10/PIK3AP1/PELI1/SQSTM1/TNIP1/NFKBIA/LACC1/TNF/TLR7/IFIH1/BTK/RSAD2/TREML4/KLRC1/OASL/OAS1/LYN/FYN/TNFAIP3/SLC15A3/NLRC4/TLR9/IRF7/COLEC11/KLRD1/LT…	innate immune response-activating signaling pathway	252	-0.236152	-1.02679	0.377724	0.812864	0.757217	2938	tags=18%, list=14%, signal=16%	NR1H4/HSPA1B/TICAM1/PRKD1/MAP3K7/GBP5/LRRC14/RNF125/GBP2/LSM14A/TRIM25/OAS1/SQSTM1/NAGLU/MAPKAPK3/TRAF6/IKBKB/OAS3/EIF2AK2/NLRP6/TRIM32/CREBBP/IRAK2/MIR17/CARD8/SEC14L1/TLR8/LYN/EP300/ATAT1/PLCG2/LILRA4/CD300LF/SLC15A3/NFKBIZ/CD274/CD36/RNF170/ZNRF1/NINJ1/NFKBIA/S100A14/ALPK1/BIRC3/TNIP1	innate immune response-activating signaling pathway	236	0.174847	0.808471	1	1	1	3248	tags=20%, list=18%, signal=17%	COLEC11/TREM2/TNIP3/F2RL1/GFI1/OAS3/TNFAIP3/CD300A/HSPA1B/TLR4/NLRC3/OAS1/GBP5/OASL/LILRA4/IRF7/DHX58/ALPK1/SARM1/NOP53/PTPN22/TRAF3/IRF4/LY96/PRKCE/RFTN1/MAPKAPK3/BTK/BIRC3/TSPAN6/TIFA/DDX60/NAIP/TLR5/CTSS/IRAK3/PELI1/PRKD1/TRAF3IP3/TNIP2/CGAS/CASP1/APPL2/UNC93B1/CYBA/KLRC4/TIRAP	0.122349	1	p3_0.122349102773246	p0_1
GO:0002759	regulation of antimicrobial humoral response	6	-0.905951	-1.7456	0.00104015	0.0296062	0.0261626	1627	tags=83%, list=8%, signal=77%	KLK7/GATA6/SPINK5/KLK5/NOD2	regulation of antimicrobial humoral response	10	0.299541	0.682893	0.873346	0.969875	0.903479	4439	tags=30%, list=21%, signal=24%	IL17A/IL17F/GATA6	regulation of antimicrobial humoral response	5	-0.761446	-1.35874	0.0991597	1	1	3633	tags=60%, list=20%, signal=48%	NOD2/SPINK5/PGC	0.00104015	0.873346	p3_0.00104015436937041	p1_0.873345935727788
GO:0002761	regulation of myeloid leukocyte differentiation	111	-0.323924	-1.11938	0.243292	0.586119	0.517944	4231	tags=32%, list=21%, signal=25%	TLR3/TGFB1/IL34/GPR137B/FSTL3/INHBA/PLA2G3/ID2/TYROBP/TMEM178A/CEBPB/POU4F2/TREM2/FBN1/CSF1/PF4/INHA/NEDD9/IAPP/TNF/ZFPM1/LYN/IRF7/TAL1/TNFRSF11B/INPP5D/CD101/LTF/TLR4/HCLS1/LIF/TESC/TNFAIP6/IL23A/CEACAM1	regulation of myeloid leukocyte differentiation	118	0.263618	1.00888	0.442308	0.843237	0.78551	3449	tags=19%, list=16%, signal=16%	RASSF2/ROR2/FSTL3/LRRC17/TGFB1/CASP8/FES/TNFAIP6/IL17A/NDFIP1/HCLS1/OCSTAMP/PLA2G3/BGLAP/MAFB/CARTPT/PF4/GPR68/RB1/CD74/TAL1/INPP5D	regulation of myeloid leukocyte differentiation	107	0.218721	0.910384	0.675214	1	1	3479	tags=27%, list=19%, signal=22%	IL34/TREM2/TNFRSF11B/CAMK4/TLR4/TGFB1/IFNG/GPR68/IRF7/TMEM178A/CD74/LILRB1/RUNX1/HLA-DRB1/PIAS3/CEACAM1/ERFE/LEF1/LILRB4/EVI2B/PPARGC1B/IL23A/C1QC/GPR137/UBASH3B/RARA/TCTA/CSF1/LYN	0.243292	0.675214	p3_0.243291592128801	p0_0.675213675213675
GO:0002762	negative regulation of myeloid leukocyte differentiation	47	-0.417603	-1.25335	0.126866	0.444158	0.392495	5347	tags=47%, list=26%, signal=35%	IL4/RARA/CCL3/PTPN2/GPR137/MYC/TLR3/GPR137B/FSTL3/INHBA/TMEM178A/FBN1/INHA/IAPP/ZFPM1/LYN/TNFRSF11B/INPP5D/LTF/TLR4/TNFAIP6/CEACAM1	negative regulation of myeloid leukocyte differentiation	49	-0.193715	-0.653309	0.971491	0.993109	0.925122	2780	tags=31%, list=13%, signal=27%	IAPP/TLR3/TMEM178A/NME2/GPR55/ZFPM1/FBXW7/NF1/ZBTB46/IL4/FBN1/CEACAM1/LYN/HOXA7/CCL3	negative regulation of myeloid leukocyte differentiation	45	-0.323805	-0.875946	0.611884	1	1	2108	tags=16%, list=12%, signal=14%	FBXW7/MYC/LTF/TRIB1/GATA2/CLDN18/SFRP1	0.126866	0.971491	p3_0.126865671641791	p1_0.971491228070175
GO:0002763	positive regulation of myeloid leukocyte differentiation	54	-0.271921	-0.834362	0.766972	0.916238	0.809665	4196	tags=30%, list=21%, signal=24%	TGFB1/IL34/PLA2G3/ID2/TYROBP/POU4F2/TREM2/CSF1/PF4/NEDD9/TNF/CD101/HCLS1/LIF/TESC/IL23A	positive regulation of myeloid leukocyte differentiation	58	0.27736	0.955462	0.55137	0.894834	0.833575	3174	tags=21%, list=15%, signal=18%	ROR2/TGFB1/CASP8/FES/IL17A/HCLS1/OCSTAMP/PLA2G3/PF4/GPR68/RB1/CD74	positive regulation of myeloid leukocyte differentiation	52	0.251264	0.922586	0.584158	1	1	2710	tags=23%, list=15%, signal=20%	IL34/TREM2/TGFB1/IFNG/GPR68/CD74/RUNX1/HLA-DRB1/LEF1/EVI2B/PPARGC1B/IL23A	0.55137	0.766972	p1_0.551369863013699	p3_0.76697247706422
GO:0002765	immune response-inhibiting signal transduction	8	-0.655518	-1.35009	0.12474	0.440435	0.389205	1928	tags=62%, list=10%, signal=57%	HLA-G/CD33/KLRC1/LYN/IL20RB	immune response-inhibiting signal transduction	10	-0.61054	-1.39977	0.0951374	0.559227	0.520943	4536	tags=60%, list=22%, signal=47%	IL20RB/HLA-G/CD33/LILRB2/LYN/PSG9	immune response-inhibiting signal transduction	8	0.332577	0.737167	0.808219	1	1	3479	tags=50%, list=19%, signal=40%	CD33/LILRB1/LILRB4/LYN	0.0951374	0.808219	p1_0.0951374207188161	p0_0.808219178082192
GO:0002768	immune response-regulating cell surface receptor signaling pathway	278	-0.37756	-1.45568	0.00318226	0.0646708	0.0571486	4327	tags=31%, list=21%, signal=25%	PRKCH/SLC39A6/RBCK1/NAGLU/HLA-G/MICB/NFKB1/HLA-A/TAX1BP1/TXK/PTPRJ/THEMIS/BTN3A1/NINJ1/F2RL1/BTN3A3/TRAF3/FCER1G/TYROBP/RIPK2/PLSCR1/KLRK1/FOXP3/LY96/KLHL6/MNDA/SYK/TREM2/UBASH3A/PRAM1/COLEC10/CARD11/SH2B2/PIK3CD/BTN1A1/IFI35/CBLB/THEMIS2/PIK3AP1/PELI1/SQSTM1/C3AR1/CD79A/C5AR1/NFKBIA/PAWR/BTK/CR1/CD40/LCP2/PRNP/PDE4D/GPLD1/KLRC1/OAS1/LYN/FYN/TNFAIP3/BTNL9/CD28/VTCN1/LAPTM5/COLEC11/CD19/NCR3/PTPRC…	immune response-regulating cell surface receptor signaling pathway	314	0.242553	1.04054	0.33222	0.797438	0.742847	3669	tags=18%, list=17%, signal=15%	CMKLR1/TLR1/LAPTM5/BTN1A1/BMX/PTPN22/KCNN4/CD8B/DENND1B/PRNP/THY1/MYD88/EIF2B2/FFAR2/MAPK10/EIF2B1/FCRL3/CARD11/F2RL1/HHLA2/LPXN/LY96/NCR3/FCN2/LIMK1/SCIMP/TNIP2/ELF1/TLR5/MAPK9/KIR2DS2/CD160/LCP2/CD276/IKBKG/CMTM3/CD40/CD81/RAB7B/PRKCH/VTCN1/CD3E/GPR32/TIRAP/CD226/PRKD2/EIF2B3/TESPA1/SOS1/UBE2N/INPP5D/CLEC4E/MAPK10/LIME1/PLCL2/HLA-DQB1/MFHAS1/CD28	immune response-regulating cell surface receptor signaling pathway	309	0.339359	1.60344	1.45766e-05	0.011671	0.011671	3708	tags=33%, list=20%, signal=26%	KCNN4/COLEC11/FCER1A/TREM2/THEMIS/TNIP3/CACNB4/CCR7/F2RL1/IGHG2/CD8A/PRKCH/TRAT1/TESPA1/HLA-DQB1/PTPN6/IGHM/MAP3K1/CMKLR1/CD226/TNFAIP3/CD200R1/GATA3/CD300A/CD3D/CD28/BCL2/BTN3A1/ITK/HLA-DPB1/CTLA4/TLR4/IGHG3/THEMIS2/LCK/TRBC2/FYB1/THY1/OAS1/CD3E/MS4A1/IGLC3/CLEC4D/LIMK1/ICOSLG/BTN3A2/TRBC1/FCGR2B/LILRA4/VAV3/FGR/PRKD2/CR1/UBASH3A/RAB29/LILRB1/NECTIN2/PTPN22/TRAF3/DGKZ/HLA-DRB1/BAX/NFKBID/CEACAM1…	1.45766e-05	0.33222	p0_1.45765856898929e-05	p1_0.332220367278798
GO:0002775	antimicrobial peptide production	6	-0.708475	-1.3651	0.116466	0.429269	0.379339	1627	tags=67%, list=8%, signal=61%	KLK7/SPINK5/KLK5/NOD2	antimicrobial peptide production	10	-0.306086	-0.701757	0.835095	0.966142	0.900001	4474	tags=40%, list=21%, signal=31%	ELANE/KLK7/LGALS4/PGC	antimicrobial peptide production	5	-0.814771	-1.45389	0.0521008	1	1	1895	tags=100%, list=10%, signal=90%	SPINK5/LGALS4/ELANE/PGC	0.0521008	0.835095	p0_0.0521008403361345	p1_0.835095137420719
GO:0002790	peptide secretion	211	-0.302565	-1.12868	0.192182	0.527614	0.466245	2393	tags=17%, list=12%, signal=15%	ABCA12/CPE/F2/CRHBP/ADCY5/PAX8/KCNB1/FFAR3/TNF/CHD7/ABCA1/TFR2/ADRA2A/GPLD1/ABAT/ABCC8/CELA2A/BRSK2/SSTR5/PCK2/GIPR/INHBB/SPINK1/HNF4A/BAIAP3/PTPRN/ISL1/CCL5/EDN1/GRP/FAM3B/IL6/CD38/VIP/FOXA2/IL1B	peptide secretion	235	-0.229712	-0.994241	0.491525	0.868418	0.808967	2938	tags=15%, list=14%, signal=13%	NR1H4/PCK2/SREBF1/LRRC8A/PRKD1/LRP5/CYB5R4/ITPR1/SMAD2/IRS1/UBE2Q1/GNAZ/FFAR4/PPP3CB/FKBP1B/PCLO/SPINK1/FGA/EGFR/CFTR/OSBP/SMPD3/NR0B2/ABCC8/SNX19/UCN/ISL1/ACVR2B/MYRIP/EDN1/ZBED6/RAPGEF4/CCDC186/KISS1/ILDR1/VSNL1	peptide secretion	185	-0.280574	-0.881044	0.687039	1	1	2998	tags=19%, list=17%, signal=16%	TIAM1/GPLD1/GNAZ/GHRL/FAM3D/SIRT4/VIP/CFTR/KCNJ11/HNF1B/PCLO/PASK/PLCB1/GPER1/PRKCB/IL1RN/ADCY5/NR1D1/FGG/ABAT/MYRIP/EPHA5/CLTRN/RASL10B/CD38/BRSK2/INHBB/RAB3A/KCNB1/FAM3B/CNR1/IL6/ZBED6/ADRA2A/SFRP1/S100A8	0.192182	0.687039	p3_0.192182410423453	p0_0.687038988408851
GO:0002791	regulation of peptide secretion	171	-0.288341	-1.04828	0.333333	0.663923	0.586698	2393	tags=18%, list=12%, signal=16%	ABCA12/F2/CRHBP/ADCY5/PAX8/KCNB1/FFAR3/TNF/CHD7/TFR2/ADRA2A/GPLD1/ABAT/ABCC8/CELA2A/BRSK2/SSTR5/PCK2/GIPR/INHBB/SPINK1/HNF4A/BAIAP3/ISL1/CCL5/GRP/IL6/CD38/FOXA2/IL1B	regulation of peptide secretion	190	-0.202521	-0.850192	0.87935	0.971251	0.904761	2938	tags=25%, list=14%, signal=22%	JAK2/ALOX5/BAD/ENSA/CCL5/CASR/SLC16A1/HNF4A/CPT1A/PFKFB2/ACVR1C/IL6/ADCY5/MIDN/SLC30A8/PLCB1/IRS2/IL6/TFR2/GCG/CHD7/NR1H4/PCK2/SREBF1/LRRC8A/PRKD1/LRP5/ITPR1/IRS1/GNAZ/FFAR4/PPP3CB/FKBP1B/SPINK1/FGA/EGFR/CFTR/OSBP/NR0B2/ABCC8/UCN/ISL1/MYRIP/ZBED6/RAPGEF4/KISS1/ILDR1/VSNL1	regulation of peptide secretion	149	-0.277706	-0.853015	0.720264	1	1	2998	tags=19%, list=17%, signal=16%	TIAM1/GPLD1/GNAZ/GHRL/FAM3D/SIRT4/CFTR/KCNJ11/PASK/PLCB1/GPER1/PRKCB/ADCY5/NR1D1/FGG/ABAT/MYRIP/EPHA5/RASL10B/CD38/BRSK2/INHBB/KCNB1/CNR1/IL6/ZBED6/ADRA2A/SFRP1/S100A8	0.333333	0.87935	p3_0.333333333333333	p1_0.879350348027842
GO:0002792	negative regulation of peptide secretion	39	0.490582	1.47538	0.0381575	0.270488	0.239026	2327	tags=28%, list=12%, signal=25%	CRH/GHRL/ACVR1C/CD74/VSNL1/PDE8B/UCP2/CHGA/IRS1/SFRP1/DRD2	negative regulation of peptide secretion	44	0.269263	0.867823	0.679702	0.931628	0.86785	3315	tags=23%, list=16%, signal=19%	FFAR2/DRD2/F2RL1/SIRT4/SYTL4/GHSR/CARTPT/FAM3D/CD74/INHBB	negative regulation of peptide secretion	36	-0.382156	-0.995715	0.440568	1	1	2871	tags=25%, list=16%, signal=21%	GNAZ/GHRL/FAM3D/SIRT4/KCNJ11/INHBB/KCNB1/ADRA2A/SFRP1	0.0381575	0.679702	p3_0.0381574970791051	p1_0.679702048417132
GO:0002793	positive regulation of peptide secretion	96	0.317463	1.11243	0.256881	0.600984	0.53108	2327	tags=18%, list=12%, signal=16%	KISS1/CRH/NKX6-1/NNAT/GHRL/RBP4/HLA-DRB1/SNAP25/ADCY8/VSNL1/CHRM3/TRH/ILDR1/TNFSF11/BLK/ADORA1/DRD2	positive regulation of peptide secretion	109	-0.335989	-1.29368	0.0695444	0.515759	0.480451	2938	tags=24%, list=14%, signal=21%	SLC30A8/PLCB1/IRS2/TFR2/GCG/NR1H4/PCK2/LRRC8A/PRKD1/ITPR1/FFAR4/PPP3CB/SPINK1/FGA/EGFR/CFTR/OSBP/NR0B2/ABCC8/UCN/ISL1/MYRIP/RAPGEF4/KISS1/ILDR1/VSNL1	positive regulation of peptide secretion	82	0.265688	1.05996	0.294118	1	1	2629	tags=24%, list=15%, signal=21%	RAPGEF4/UCN/HFE/ANO1/TRH/ORAI1/TFR2/ADCYAP1/GPR68/RPH3AL/VSNL1/MCU/SELENOT/HLA-DRB1/AACS/PCK2/FFAR4/PRKCE/CAPN10/TM7SF3	0.0695444	0.294118	p1_0.0695443645083933	p0_0.294117647058824
GO:0002819	regulation of adaptive immune response	175	-0.428927	-1.56638	0.00132614	0.0350858	0.0310048	4196	tags=38%, list=21%, signal=31%	TGFB1/BATF/HLA-G/MICA/IL4R/MICB/HLA-A/CD46/HLA-H/SMAD7/PRKCZ/TNFSF4/RIPK2/IL27RA/FOXP3/CD55/CCR2/SASH3/TREM2/HLA-B/IRF1/SAMSN1/HLA-C/PVR/ULBP2/ARID5A/TNF/LOXL3/BTK/CR1/CARD9/CD80/LTA/RSAD2/SPN/KLRC1/IL4I1/TNFAIP3/ASCL2/ULBP1/IL33/CD28/C4BPA/IL20RB/IRF7/SVEP1/IFNB1/PTPRC/KLRD1/ZC3H12A/CR1L/HLA-F/CCL19/ALOX15/NFKBIZ/C4BPB/IL18R1/NLRP3/CD1D/IL1RL1/GATA3/IL23A/C3/NOD2/CEACAM1/IL6/IL1B	regulation of adaptive immune response	192	0.282643	1.1521	0.141361	0.643131	0.599104	3906	tags=23%, list=19%, signal=19%	HLX/IL33/ZBTB7B/DENND1B/IL27RA/MR1/ANXA1/TGFB1/IL1RL1/CD1A/CCL19/RIPK3/ASCL2/FOXJ1/ULBP2/NDFIP1/CD1C/DUSP10/CD160/TAP2/STAT6/TNFSF4/CLCF1/LOXL3/CD81/SAMSN1/MLH1/HSPD1/HMGB1/SLC15A4/CD226/TNFSF13B/AKIRIN2/MSH2/PARP3/CCR2/IL12A/TBX21/RAET1E/CD28/HAVCR2/HFE/HPX/PLA2G4A/FBXO38	regulation of adaptive immune response	180	0.336315	1.50629	0.0015457	0.208565	0.208565	3609	tags=35%, list=20%, signal=28%	RAET1E/TREM2/CD1E/BATF/HFE/SLAMF1/PTPN6/IL27RA/IL7R/CD226/TNFAIP3/GATA3/CD28/LOXL3/ULBP2/CCR2/CARD9/DUSP10/ADCY7/HLA-DRA/TGFB1/KMT5C/PRKCZ/FCGR2B/IRF7/JAK3/NSD2/CR1/WAS/LILRB1/NECTIN2/IL18R1/IL1R1/MSH2/HLA-DRB1/NFKBID/TNFRSF14/PMS2/CEACAM1/SAMSN1/LILRB4/BTK/P2RX7/SMAD7/IL23A/TRAF2/SHLD3/TYK2/FCGR1A/B2M/HLA-C/PARP3/MICB/SHLD1/CD55/SOCS5/HLA-A/PAXIP1/HLA-B/HLA-E/NLRP3/PTPRC/IL23R	0.00132614	0.141361	p3_0.00132614302768164	p1_0.141361256544503
GO:0002820	negative regulation of adaptive immune response	51	-0.610307	-1.86158	0.000297202	0.0108832	0.00961735	1859	tags=43%, list=9%, signal=39%	LOXL3/CR1/CD80/SPN/KLRC1/IL4I1/ASCL2/IL33/C4BPA/IL20RB/SVEP1/IFNB1/PTPRC/KLRD1/ZC3H12A/CR1L/HLA-F/ALOX15/C4BPB/IL1RL1/NOD2/CEACAM1	negative regulation of adaptive immune response	61	0.334452	1.15556	0.197595	0.690518	0.643246	3682	tags=24%, list=18%, signal=20%	IL33/ZBTB7B/IL27RA/IL1RL1/ASCL2/FOXJ1/NDFIP1/CD160/TNFSF4/LOXL3/SAMSN1/PARP3/TBX21/HAVCR2/HFE	negative regulation of adaptive immune response	55	0.30371	1.11058	0.240642	1	1	2611	tags=27%, list=14%, signal=23%	HFE/SLAMF1/PTPN6/IL27RA/IL7R/LOXL3/FCGR2B/JAK3/CR1/LILRB1/TNFRSF14/CEACAM1/SAMSN1/LILRB4/SMAD7	0.000297202	0.240642	p3_0.000297201715657997	p0_0.240641711229947
GO:0002821	positive regulation of adaptive immune response	109	-0.41182	-1.42068	0.0228827	0.198145	0.175097	4196	tags=36%, list=21%, signal=29%	TGFB1/HLA-G/MICA/MICB/HLA-A/HLA-H/PRKCZ/TNFSF4/RIPK2/IL27RA/FOXP3/CD55/CCR2/SASH3/TREM2/HLA-B/HLA-C/PVR/ULBP2/ARID5A/TNF/BTK/CARD9/LTA/RSAD2/ULBP1/CD28/PTPRC/HLA-F/NFKBIZ/IL18R1/NLRP3/CD1D/GATA3/IL23A/C3/NOD2/IL6/IL1B	positive regulation of adaptive immune response	116	0.233242	0.891143	0.696864	0.936099	0.872015	3906	tags=23%, list=19%, signal=19%	DENND1B/IL27RA/MR1/TGFB1/CD1A/ULBP2/CD1C/TAP2/STAT6/TNFSF4/CLCF1/CD81/MLH1/HSPD1/CD226/TNFSF13B/AKIRIN2/MSH2/CCR2/IL12A/TBX21/RAET1E/CD28/HFE/HPX/PLA2G4A/FBXO38	positive regulation of adaptive immune response	110	0.394942	1.64102	0.00115486	0.180129	0.180129	3609	tags=39%, list=20%, signal=31%	RAET1E/TREM2/CD1E/HFE/SLAMF1/IL27RA/CD226/GATA3/CD28/ULBP2/CCR2/CARD9/HLA-DRA/TGFB1/KMT5C/PRKCZ/NSD2/NECTIN2/IL18R1/IL1R1/MSH2/HLA-DRB1/NFKBID/PMS2/BTK/P2RX7/IL23A/TRAF2/SHLD3/TYK2/FCGR1A/B2M/HLA-C/MICB/SHLD1/CD55/HLA-A/PAXIP1/HLA-B/HLA-E/NLRP3/PTPRC/IL23R	0.00115486	0.696864	p0_0.0011548597561658	p1_0.696864111498258
GO:0002822	regulation of adaptive immune response based on somatic recombination of immune receptors built from immunoglobulin superfamily domains	161	-0.427023	-1.5486	0.00111482	0.0308563	0.0272672	1875	tags=39%, list=9%, signal=36%	TGFB1/BATF/HLA-G/MICA/IL4R/MICB/HLA-A/CD46/HLA-H/SMAD7/PRKCZ/TNFSF4/RIPK2/IL27RA/FOXP3/CD55/CCR2/SASH3/TREM2/HLA-B/HLA-C/PVR/ULBP2/ARID5A/TNF/LOXL3/BTK/CR1/CARD9/CD80/LTA/RSAD2/SPN/KLRC1/IL4I1/TNFAIP3/ASCL2/ULBP1/IL33/CD28/C4BPA/IL20RB/SVEP1/IFNB1/PTPRC/KLRD1/ZC3H12A/CR1L/HLA-F/CCL19/NFKBIZ/C4BPB/IL18R1/NLRP3/CD1D/IL1RL1/GATA3/IL23A/C3/NOD2/CEACAM1/IL6/IL1B	regulation of adaptive immune response based on somatic recombination of immune receptors built from immunoglobulin superfamily domains	177	0.29004	1.17382	0.1375	0.638083	0.5944	3906	tags=23%, list=19%, signal=19%	HLX/IL33/ZBTB7B/DENND1B/IL27RA/MR1/ANXA1/TGFB1/IL1RL1/CD1A/CCL19/RIPK3/ASCL2/FOXJ1/ULBP2/NDFIP1/CD1C/TAP2/STAT6/TNFSF4/CLCF1/LOXL3/CD81/MLH1/HSPD1/HMGB1/SLC15A4/CD226/TNFSF13B/MSH2/PARP3/CCR2/IL12A/TBX21/RAET1E/CD28/HAVCR2/HFE/HPX/PLA2G4A/FBXO38	regulation of adaptive immune response based on somatic recombination of immune receptors built from immunoglobulin superfamily domains	165	0.327224	1.43762	0.00573353	0.440379	0.440379	3609	tags=35%, list=20%, signal=28%	RAET1E/TREM2/CD1E/BATF/HFE/SLAMF1/PTPN6/IL27RA/IL7R/CD226/TNFAIP3/GATA3/CD28/LOXL3/ULBP2/CCR2/CARD9/HLA-DRA/TGFB1/KMT5C/PRKCZ/FCGR2B/JAK3/NSD2/CR1/WAS/LILRB1/NECTIN2/IL18R1/IL1R1/MSH2/HLA-DRB1/NFKBID/PMS2/CEACAM1/LILRB4/BTK/P2RX7/SMAD7/IL23A/TRAF2/SHLD3/TYK2/FCGR1A/B2M/HLA-C/PARP3/MICB/SHLD1/CD55/SOCS5/HLA-A/PAXIP1/HLA-B/HLA-E/NLRP3/PTPRC/IL23R	0.00111482	0.1375	p3_0.00111482135600756	p1_0.1375
GO:0002823	negative regulation of adaptive immune response based on somatic recombination of immune receptors built from immunoglobulin superfamily domains	47	-0.620688	-1.86287	0.000357791	0.0126626	0.0111898	1859	tags=45%, list=9%, signal=41%	LOXL3/CR1/CD80/SPN/KLRC1/IL4I1/ASCL2/IL33/C4BPA/IL20RB/SVEP1/IFNB1/PTPRC/KLRD1/ZC3H12A/CR1L/HLA-F/C4BPB/IL1RL1/NOD2/CEACAM1	negative regulation of adaptive immune response based on somatic recombination of immune receptors built from immunoglobulin superfamily domains	56	0.338295	1.14895	0.216549	0.707411	0.658983	3682	tags=23%, list=18%, signal=19%	IL33/ZBTB7B/IL27RA/IL1RL1/ASCL2/FOXJ1/NDFIP1/TNFSF4/LOXL3/PARP3/TBX21/HAVCR2/HFE	negative regulation of adaptive immune response based on somatic recombination of immune receptors built from immunoglobulin superfamily domains	50	0.291436	1.04936	0.328431	1	1	2611	tags=26%, list=14%, signal=22%	HFE/SLAMF1/PTPN6/IL27RA/IL7R/LOXL3/FCGR2B/JAK3/CR1/LILRB1/CEACAM1/LILRB4/SMAD7	0.000357791	0.328431	p3_0.000357790518092856	p0_0.32843137254902
GO:0002824	positive regulation of adaptive immune response based on somatic recombination of immune receptors built from immunoglobulin superfamily domains	103	-0.420346	-1.43939	0.0208298	0.19069	0.16851	4196	tags=38%, list=21%, signal=30%	TGFB1/HLA-G/MICA/MICB/HLA-A/HLA-H/PRKCZ/TNFSF4/RIPK2/IL27RA/FOXP3/CD55/CCR2/SASH3/TREM2/HLA-B/HLA-C/PVR/ULBP2/ARID5A/TNF/BTK/CARD9/LTA/RSAD2/ULBP1/CD28/PTPRC/HLA-F/NFKBIZ/IL18R1/NLRP3/CD1D/GATA3/IL23A/C3/NOD2/IL6/IL1B	positive regulation of adaptive immune response based on somatic recombination of immune receptors built from immunoglobulin superfamily domains	110	0.243475	0.928859	0.620102	0.916355	0.853623	3906	tags=23%, list=19%, signal=19%	DENND1B/IL27RA/MR1/TGFB1/CD1A/ULBP2/CD1C/TAP2/STAT6/TNFSF4/CLCF1/CD81/MLH1/HSPD1/CD226/TNFSF13B/MSH2/CCR2/IL12A/TBX21/RAET1E/CD28/HFE/HPX/PLA2G4A/FBXO38	positive regulation of adaptive immune response based on somatic recombination of immune receptors built from immunoglobulin superfamily domains	104	0.40451	1.65953	0.000618138	0.116228	0.116228	3609	tags=41%, list=20%, signal=33%	RAET1E/TREM2/CD1E/HFE/SLAMF1/IL27RA/CD226/GATA3/CD28/ULBP2/CCR2/CARD9/HLA-DRA/TGFB1/KMT5C/PRKCZ/NSD2/NECTIN2/IL18R1/IL1R1/MSH2/HLA-DRB1/NFKBID/PMS2/BTK/P2RX7/IL23A/TRAF2/SHLD3/TYK2/FCGR1A/B2M/HLA-C/MICB/SHLD1/CD55/HLA-A/PAXIP1/HLA-B/HLA-E/NLRP3/PTPRC/IL23R	0.000618138	0.620102	p0_0.000618137756651475	p1_0.620102214650767
GO:0002825	regulation of T-helper 1 type immune response	27	-0.549841	-1.49839	0.0469043	0.306365	0.27073	3630	tags=48%, list=18%, signal=40%	TNFSF4/RIPK2/IL27RA/CCR2/ARID5A/CD80/ASCL2/IL33/CCL19/IL18R1/IL1RL1/IL23A/IL1B	regulation of T-helper 1 type immune response	31	0.560239	1.6656	0.00570031	0.129208	0.120363	4303	tags=41%, list=20%, signal=32%	HLX/IL33/IL27RA/ANXA1/IL1RL1/CCL19/ASCL2/TNFSF4/CCR2/TBX21/HAVCR2/PLA2G4A/NLRP10	regulation of T-helper 1 type immune response	29	0.277746	0.868507	0.657795	1	1	1869	tags=21%, list=10%, signal=19%	SLAMF1/IL27RA/CCR2/JAK3/IL18R1/IL1R1	0.00570031	0.657795	p1_0.00570031130556457	p0_0.657794676806084
GO:0002827	positive regulation of T-helper 1 type immune response	15	-0.573151	-1.36392	0.11412	0.427744	0.377991	3543	tags=47%, list=18%, signal=39%	RIPK2/IL27RA/CCR2/ARID5A/IL18R1/IL23A/IL1B	positive regulation of T-helper 1 type immune response	18	-0.273868	-0.742582	0.834382	0.966142	0.900001	1800	tags=11%, list=9%, signal=10%	XCL1/IL12RB1	positive regulation of T-helper 1 type immune response	16	0.483709	1.31286	0.155844	1	1	2710	tags=38%, list=15%, signal=32%	SLAMF1/IL27RA/CCR2/IL18R1/IL1R1/IL23A	0.11412	0.834382	p3_0.114119922630561	p1_0.834381551362683
GO:0002828	regulation of type 2 immune response	30	-0.475796	-1.32843	0.104283	0.412321	0.364361	1708	tags=47%, list=8%, signal=43%	IL4R/ARG2/PRKCZ/TNFSF4/IL27RA/CCR2/RSAD2/ASCL2/IL33/IFNB1/NLRP3/GATA3/NOD2/IL6	regulation of type 2 immune response	34	0.56615	1.72268	0.00184946	0.0708998	0.0660461	3589	tags=37%, list=17%, signal=31%	HLX/IL33/DENND1B/IL27RA/ANXA1/ASCL2/NDFIP1/STAT6/TNFSF4/CD81/CCR2/CD74/TBX21	regulation of type 2 immune response	30	0.297394	0.927173	0.581967	1	1	1946	tags=23%, list=11%, signal=21%	IL27RA/GATA3/CCR2/ECM1/PRKCZ/CD74/IDO1	0.00184946	0.581967	p1_0.00184946073071552	p0_0.581967213114754
GO:0002829	negative regulation of type 2 immune response	12	-0.609666	-1.39849	0.105461	0.414073	0.36591	4935	tags=67%, list=24%, signal=50%	NDFIP1/HLX/BCL6/ARG2/IL27RA/CCR2/ASCL2/IFNB1	negative regulation of type 2 immune response	15	0.695465	1.76133	0.00183924	0.0708998	0.0660461	4291	tags=60%, list=20%, signal=48%	HLX/IL27RA/ANXA1/ASCL2/NDFIP1/STAT6/CCR2/TBX21/IFNL1	negative regulation of type 2 immune response	12	0.395034	1.00902	0.442529	1	1	901	tags=17%, list=5%, signal=16%	IL27RA/CCR2	0.00183924	0.442529	p1_0.00183923686817083	p0_0.442528735632184
GO:0002830	positive regulation of type 2 immune response	17	-0.51057	-1.25759	0.178161	0.511807	0.452276	1708	tags=35%, list=8%, signal=32%	RSAD2/IL33/NLRP3/GATA3/NOD2/IL6	positive regulation of type 2 immune response	18	0.463162	1.21327	0.211429	0.705092	0.656822	3174	tags=26%, list=15%, signal=22%	IL33/DENND1B/TNFSF4/CD81/CD74	positive regulation of type 2 immune response	17	-0.248089	-0.568968	0.954545	1	1	3633	tags=29%, list=20%, signal=24%	TNFSF4/NOD2/IL33/IL18/IL6	0.178161	0.954545	p3_0.17816091954023	p0_0.954545454545455
GO:0002832	negative regulation of response to biotic stimulus	103	-0.250792	-0.858786	0.758319	0.91217	0.806071	5290	tags=34%, list=26%, signal=25%	PTPN2/HLA-E/NR1H2/OAS3/AHR/NT5C2/NFKBIL1/CD96/RPS19/SERPINB9/TGFB1/HLA-G/MICA/MICB/HLA-A/ARG2/STAT2/PARP14/FOXP3/HLA-B/GRN/DHX58/CR1/SLAMF8/LGALS9/KLRC1/OAS1/IL4I1/TNFAIP3/SPINK5/KLRD1/HLA-F/ISG15/LTF/CEACAM1	negative regulation of response to biotic stimulus	111	0.272012	1.03718	0.37931	0.812864	0.757217	4105	tags=21%, list=20%, signal=17%	SERPINB9/TGFB1/DRD2/AURKB/LACRT/ITCH/METTL3/DUSP10/EIF4E2/TREX1/LYAR/NLRC3/YWHAZ/TRAFD1/C1QBP/MUL1/USP15/BANF1/YTHDF2/HAVCR2/PARP1/TTLL12/LILRA2/MAVS	negative regulation of response to biotic stimulus	101	0.312654	1.28433	0.0861188	1	1	3502	tags=28%, list=19%, signal=22%	NLRC5/PPARG/OAS3/TNFAIP3/FGL2/LGALS9/NLRC3/DUSP10/SLAMF8/OAS1/TGFB1/CD96/DHX58/CR1/LILRB1/CEACAM1/MAPKBP1/SERPINB9/TRAFD1/SMIM30/IRAK3/STAT2/MICB/HLA-A/HLA-B/CRK/HLA-E/CARD16	0.0861188	0.758319	p0_0.0861187648951918	p3_0.758318739054291
GO:0002833	positive regulation of response to biotic stimulus	318	-0.271216	-1.05454	0.279869	0.6225	0.550093	4231	tags=26%, list=21%, signal=21%	TLR3/MIF/NAGLU/RNF185/HLA-G/GPR108/TAX1BP1/TXK/TRIM5/LAMP1/HSPA1B/NINJ1/F2RL1/TRAF3/SLC15A2/NR1H4/TYROBP/CTSS/RIPK2/PLSCR1/KLRK1/TIFA/UNC93B1/LY96/BIRC3/MNDA/SYK/TREM2/IRF1/ZBP1/COLEC10/DDX60/GRN/MMRN2/DHX58/IFI35/PVR/TLR10/PIK3AP1/PELI1/SQSTM1/TNIP1/NFKBIA/LACC1/TNF/TLR7/IFIH1/BTK/CARD9/RSAD2/TREML4/KLK7/KLRC1/OASL/OAS1/LYN/FYN/TNFAIP3/SLC15A3/NLRC4/TLR9/IRF7/COLEC11/IFNB1/NCR3/KLRD1/VAV1/HLA-F/…	positive regulation of response to biotic stimulus	357	0.205226	0.890955	0.854063	0.968248	0.901963	4320	tags=22%, list=21%, signal=18%	TLR1/PTPN22/SIRT2/EMILIN2/NAGK/AIM2/HCFC2/MR1/MYD88/FFAR2/PLA2G5/AURKB/UNC93B1/FCRL3/GFI1/MAPKAPK2/ITCH/POLR3B/F2RL1/IL17A/LY96/TSPAN6/NCR3/FCN2/SCIMP/CRTAM/TNIP2/CLPB/RBM47/HSP90AA1/TLR5/KIR2DS2/TREX1/CD160/NLRC3/XRCC6/GRAMD4/RAB7B/C1QBP/HSPD1/IL18RAP/IL17F/HMGB1/SLC15A4/NOD1/TIRAP/CD226/HRG/SLC46A2/OTULIN/AKIRIN2/SLAMF6/USP15/REG3G/ZNRF4/IL12A/CLEC4E/MFHAS1/BANF1/RAET1E/PYHIN1/HAVCR2/POLR3D/PPP…	positive regulation of response to biotic stimulus	326	0.206431	0.961383	0.625989	1	1	3248	tags=21%, list=18%, signal=17%	RAET1E/COLEC11/TREM2/TNIP3/F2RL1/LY86/GFI1/NLRC5/IKBKE/OAS3/CCL5/CD226/TNFAIP3/SLAMF6/CD300A/GSDME/HSPA1B/TLR4/NLRC3/CARD9/OAS1/GBP5/OASL/LILRA4/BMP6/IRF7/DHX58/ALPK1/SARM1/CD180/NOP53/MMRN2/NECTIN2/PTPN22/TRAF3/POLR3B/CRTAM/IRF4/HLA-DRB1/LY96/PRKCE/RFTN1/MAPKAPK3/BTK/BIRC3/TSPAN6/PYHIN1/TIFA/LAG3/DDX60/NAIP/TLR5/CTSS/IRAK3/PELI1/PRKD1/ZBP1/TRAF3IP3/TNIP2/CGAS/CASP1/ADAM8/TRIM5/APPL2/UNC93B1/CYBA…	0.279869	0.854063	p3_0.27986906710311	p1_0.854063018242123
GO:0002834	regulation of response to tumor cell	18	0.475564	1.18834	0.218029	0.561951	0.496587	2679	tags=44%, list=13%, signal=39%	CRTAM/HAVCR2/HLA-DRB1/IL12B/HMGB1/SLC22A13/IL12A/CD226	regulation of response to tumor cell	20	0.511519	1.38596	0.10223	0.574969	0.535608	3906	tags=55%, list=19%, signal=45%	MR1/TGFB1/CRTAM/CD160/HSPD1/HMGB1/CD226/HRG/IL12A/HAVCR2/FBXO38	regulation of response to tumor cell	18	0.576267	1.58597	0.0274631	0.885606	0.885606	2214	tags=39%, list=12%, signal=34%	CD226/GSDME/TGFB1/NECTIN2/CRTAM/HLA-DRB1/CEACAM1	0.0274631	0.218029	p0_0.0274631381334888	p3_0.218029350104822
GO:0002836	positive regulation of response to tumor cell	11	0.723745	1.60448	0.0151151	0.157902	0.139535	2679	tags=55%, list=13%, signal=47%	CRTAM/HLA-DRB1/IL12B/SLC22A13/IL12A/CD226	positive regulation of response to tumor cell	13	0.613126	1.49254	0.0562852	0.466298	0.434376	3906	tags=62%, list=19%, signal=50%	MR1/CRTAM/CD160/HSPD1/CD226/HRG/IL12A/FBXO38	positive regulation of response to tumor cell	11	0.692501	1.72405	0.012337	0.600901	0.600901	1988	tags=45%, list=11%, signal=40%	CD226/GSDME/NECTIN2/CRTAM/HLA-DRB1	0.012337	0.0562852	p0_0.0123369734187501	p1_0.0562851782363977
GO:0002837	regulation of immune response to tumor cell	17	0.509502	1.26028	0.164583	0.49725	0.439412	2679	tags=47%, list=13%, signal=41%	CRTAM/HAVCR2/HLA-DRB1/IL12B/HMGB1/SLC22A13/IL12A/CD226	regulation of immune response to tumor cell	19	0.560758	1.49368	0.054409	0.457991	0.426638	3906	tags=58%, list=19%, signal=47%	MR1/TGFB1/CRTAM/CD160/HSPD1/HMGB1/CD226/HRG/IL12A/HAVCR2/FBXO38	regulation of immune response to tumor cell	17	0.620837	1.69674	0.0107501	0.585771	0.585771	2214	tags=41%, list=12%, signal=36%	CD226/GSDME/TGFB1/NECTIN2/CRTAM/HLA-DRB1/CEACAM1	0.0107501	0.164583	p0_0.0107501354685915	p3_0.164583333333333
GO:0002839	positive regulation of immune response to tumor cell	11	0.723745	1.60448	0.0151151	0.157902	0.139535	2679	tags=55%, list=13%, signal=47%	CRTAM/HLA-DRB1/IL12B/SLC22A13/IL12A/CD226	positive regulation of immune response to tumor cell	13	0.613126	1.49254	0.0562852	0.466298	0.434376	3906	tags=62%, list=19%, signal=50%	MR1/CRTAM/CD160/HSPD1/CD226/HRG/IL12A/FBXO38	positive regulation of immune response to tumor cell	11	0.692501	1.72405	0.012337	0.600901	0.600901	1988	tags=45%, list=11%, signal=40%	CD226/GSDME/NECTIN2/CRTAM/HLA-DRB1	0.012337	0.0562852	p0_0.0123369734187501	p1_0.0562851782363977
GO:0002861	regulation of inflammatory response to antigenic stimulus	36	-0.580138	-1.67259	0.00584226	0.094955	0.0839103	1875	tags=44%, list=9%, signal=40%	SYK/TREM2/TNF/BTK/LTA/SPN/LYN/FYN/RHBDF2/CD28/PLK2/IL20RB/CCR7/FGR/C3/NOD2	regulation of inflammatory response to antigenic stimulus	40	-0.367211	-1.18808	0.1939	0.688579	0.641439	3616	tags=24%, list=17%, signal=20%	PLCG1/SPN/C3/GPX1/ZP3/NLRP6/FCGR2B/FUT7/LYN/PLK2	regulation of inflammatory response to antigenic stimulus	37	-0.501831	-1.30481	0.178385	1	1	1318	tags=14%, list=7%, signal=13%	SYK/IL20RB/C3/CNR1/GPX1	0.00584226	0.1939	p3_0.00584226132053263	p1_0.193899782135076
GO:0002862	negative regulation of inflammatory response to antigenic stimulus	25	-0.477622	-1.28062	0.159615	0.491215	0.434079	2858	tags=40%, list=14%, signal=34%	SYK/TREM2/SPN/LYN/FYN/RHBDF2/PLK2/IL20RB/FGR/NOD2	negative regulation of inflammatory response to antigenic stimulus	28	-0.390707	-1.17294	0.221258	0.710513	0.661872	3616	tags=24%, list=17%, signal=20%	PLCG1/SPN/GPX1/NLRP6/FCGR2B/LYN/PLK2	negative regulation of inflammatory response to antigenic stimulus	25	-0.55228	-1.35892	0.160714	1	1	1318	tags=12%, list=7%, signal=11%	SYK/IL20RB/GPX1	0.159615	0.221258	p3_0.159615384615385	p1_0.221258134490239
GO:0002863	positive regulation of inflammatory response to antigenic stimulus	11	-0.850441	-1.89548	0.000396725	0.013714	0.0121189	1875	tags=55%, list=9%, signal=50%	TNF/BTK/LTA/CD28/CCR7/C3	positive regulation of inflammatory response to antigenic stimulus	11	-0.257636	-0.605629	0.927505	0.984219	0.916841	2251	tags=55%, list=11%, signal=49%	HLA-E/CCR7/PARK7/CNR1/C3/ZP3	positive regulation of inflammatory response to antigenic stimulus	11	-0.404907	-0.849208	0.648523	1	1	603	tags=18%, list=3%, signal=18%	C3/CNR1	0.000396725	0.927505	p3_0.000396725126110724	p1_0.927505330490405
GO:0002864	regulation of acute inflammatory response to antigenic stimulus	10	-0.80488	-1.74587	0.00783152	0.110716	0.0978381	1831	tags=50%, list=9%, signal=45%	BTK/SPN/IL20RB/CCR7/C3	regulation of acute inflammatory response to antigenic stimulus	12	-0.616864	-1.48391	0.0536481	0.45483	0.423693	6255	tags=67%, list=30%, signal=47%	PARK7/IL20RB/CNR1/SPN/C3/ZP3/FCGR2B/FUT7	regulation of acute inflammatory response to antigenic stimulus	14	-0.415415	-0.906394	0.578869	1	1	838	tags=29%, list=5%, signal=27%	NPY5R/IL20RB/C3/CNR1	0.00783152	0.578869	p3_0.00783152472489623	p0_0.578869047619048
GO:0002886	regulation of myeloid leukocyte mediated immunity	51	-0.516233	-1.57464	0.0130195	0.14813	0.1309	4117	tags=41%, list=20%, signal=33%	IL4R/CX3CR1/PLA2G3/F2RL1/TYROBP/ADORA2B/CCR2/GATA1/SYK/GAB2/PRAM1/BTK/LGALS9/STXBP2/UNC13D/LYN/ITGB2/FGR/IL13/C3/CXCL6	regulation of myeloid leukocyte mediated immunity	52	0.316065	1.05279	0.371115	0.810826	0.755318	1718	tags=11%, list=8%, signal=10%	RAC2/STXBP2/FES/DDX21/F2RL1/PLA2G3	regulation of myeloid leukocyte mediated immunity	52	-0.230932	-0.635222	0.945	1	1	2439	tags=15%, list=13%, signal=13%	TICAM2/ARG1/CD177/CX3CR1/SYK/FOXF1/GATA2/C3	0.0130195	0.945	p3_0.0130194822447066	p0_0.945
GO:0002887	negative regulation of myeloid leukocyte mediated immunity	10	-0.27941	-0.606069	0.92986	0.985202	0.870607	4555	tags=40%, list=23%, signal=31%	IL13RA2/CX3CR1/CCR2/LGALS9	negative regulation of myeloid leukocyte mediated immunity	11	-0.337384	-0.793095	0.752665	0.954402	0.889065	4765	tags=42%, list=23%, signal=32%	CD84/BCR/LGALS9/CX3CR1/FCGR2B	negative regulation of myeloid leukocyte mediated immunity	11	0.50722	1.26278	0.192201	1	1	1368	tags=45%, list=8%, signal=42%	CD300A/LGALS9/CCR2/FCGR2B/IL13RA2	0.192201	0.92986	p0_0.192200557103064	p3_0.929859719438878
GO:0002888	positive regulation of myeloid leukocyte mediated immunity	17	-0.425985	-1.04925	0.37931	0.700823	0.619306	3700	tags=29%, list=18%, signal=24%	F2RL1/TYROBP/BTK/ITGB2/C3	positive regulation of myeloid leukocyte mediated immunity	18	0.370594	0.970785	0.485714	0.86406	0.804908	4105	tags=22%, list=20%, signal=18%	DDX21/F2RL1/PTAFR/MAVS	positive regulation of myeloid leukocyte mediated immunity	20	-0.324497	-0.761833	0.756374	1	1	2439	tags=20%, list=13%, signal=17%	TICAM2/ARG1/CD177/C3	0.37931	0.756374	p3_0.379310344827586	p0_0.756373937677054
GO:0002889	regulation of immunoglobulin mediated immune response	49	-0.415796	-1.26892	0.121157	0.436662	0.385871	1875	tags=49%, list=9%, signal=45%	IL4/HLA-E/TFRC/BCL6/APLF/SLC15A4/TGFB1/CD46/TNFSF4/IL27RA/FOXP3/TREM2/TNF/BTK/CR1/LTA/CD28/C4BPA/SVEP1/PTPRC/CR1L/C4BPB/C3/NOD2	regulation of immunoglobulin mediated immune response	54	0.282136	0.949979	0.538324	0.889319	0.828437	3759	tags=28%, list=18%, signal=23%	IL27RA/TGFB1/FOXJ1/NDFIP1/STAT6/TNFSF4/CLCF1/MLH1/SLC15A4/CD226/MSH2/PARP3/TBX21/CD28/HPX	regulation of immunoglobulin mediated immune response	53	0.368274	1.35782	0.0999767	1	1	3757	tags=42%, list=21%, signal=33%	TREM2/PTPN6/IL27RA/CD226/CD28/TGFB1/KMT5C/FCGR2B/NSD2/CR1/NECTIN2/MSH2/PMS2/BTK/SHLD3/FCGR1A/PARP3/SHLD1/PAXIP1/HLA-E/PTPRC/CR1L	0.0999767	0.538324	p0_0.0999767334947721	p1_0.538324420677362
GO:0002890	negative regulation of immunoglobulin mediated immune response	13	-0.500592	-1.16109	0.274286	0.617202	0.545412	1805	tags=62%, list=9%, signal=56%	BCL6/CD46/FOXP3/CR1/C4BPA/SVEP1/CR1L/C4BPB	negative regulation of immunoglobulin mediated immune response	15	0.311621	0.78921	0.761194	0.956841	0.891337	3056	tags=20%, list=15%, signal=17%	FOXJ1/NDFIP1/PARP3	negative regulation of immunoglobulin mediated immune response	12	-0.372287	-0.793122	0.711009	1	1	775	tags=17%, list=4%, signal=16%	C4BPA/SVEP1	0.274286	0.761194	p3_0.274285714285714	p1_0.761194029850746
GO:0002891	positive regulation of immunoglobulin mediated immune response	31	-0.454873	-1.28053	0.138632	0.460382	0.406832	1875	tags=23%, list=9%, signal=21%	TNF/BTK/LTA/CD28/PTPRC/C3/NOD2	positive regulation of immunoglobulin mediated immune response	34	-0.287769	-0.89916	0.633987	0.917906	0.855067	2855	tags=21%, list=14%, signal=18%	TP53BP1/IL4/C3/XCL1/FCER2/PMS2/TFRC	positive regulation of immunoglobulin mediated immune response	36	0.43564	1.42372	0.041011	1	1	3564	tags=44%, list=20%, signal=36%	TREM2/CD226/CD28/TGFB1/KMT5C/NSD2/NECTIN2/MSH2/PMS2/BTK/SHLD3/FCGR1A/SHLD1/PAXIP1/HLA-E/PTPRC	0.041011	0.633987	p0_0.0410109782468947	p1_0.633986928104575
GO:0002902	regulation of B cell apoptotic process	18	0.445487	1.11318	0.318658	0.654149	0.578061	1882	tags=22%, list=9%, signal=20%	AURKB/IL10/CD74/MIR17HG	regulation of B cell apoptotic process	20	0.343735	0.931352	0.548327	0.894447	0.833214	5281	tags=43%, list=25%, signal=32%	MIR17HG/AURKB/CD74/FNIP1/SLC39A10/PDCD1/ADA/IL2/NOC2L	regulation of B cell apoptotic process	18	0.424076	1.16712	0.251748	1	1	4356	tags=50%, list=24%, signal=38%	PDCD1/BCL2/CD74/BAX/BTK/NOC2L/LYN/BCL6/BCL10	0.251748	0.548327	p0_0.251748251748252	p1_0.548327137546468
GO:0002903	negative regulation of B cell apoptotic process	13	0.486767	1.12158	0.320755	0.655688	0.579421	4373	tags=46%, list=22%, signal=36%	AURKB/CD74/MIR17HG/SLC39A10/BCL2/FOXP1	negative regulation of B cell apoptotic process	15	0.423797	1.07331	0.373134	0.810826	0.755318	5281	tags=50%, list=25%, signal=37%	MIR17HG/AURKB/CD74/SLC39A10/PDCD1/ADA/IL2/NOC2L	negative regulation of B cell apoptotic process	13	0.425387	1.10631	0.325513	1	1	4356	tags=46%, list=24%, signal=35%	PDCD1/BCL2/CD74/NOC2L/BCL6/BCL10	0.320755	0.373134	p3_0.320754716981132	p1_0.373134328358209
GO:0002920	regulation of humoral immune response	34	-0.642433	-1.8375	0.00212093	0.048009	0.0424248	1875	tags=50%, list=9%, signal=45%	TNF/CR1/LTA/CFH/KLK7/GATA6/C4BPA/SVEP1/SPINK5/PTPRC/CCR7/CR1L/C4BPB/KLK5/C3/NOD2/IL1B	regulation of humoral immune response	42	-0.303165	-0.994498	0.454158	0.847802	0.789763	2588	tags=21%, list=12%, signal=19%	CR1/VSIG4/C3/ZP3/CFH/PGC/FCGR2B/FCER2/CXCL13	regulation of humoral immune response	29	-0.366662	-0.921142	0.542625	1	1	2061	tags=21%, list=11%, signal=18%	SPNS2/SPINK5/C4BPA/C3/SVEP1/PGC	0.00212093	0.542625	p3_0.00212093407651008	p0_0.542625169147497
GO:0002921	negative regulation of humoral immune response	15	-0.400221	-0.952404	0.512573	0.785582	0.694207	1805	tags=40%, list=9%, signal=36%	CR1/C4BPA/SVEP1/SPINK5/CR1L/C4BPB	negative regulation of humoral immune response	17	-0.339989	-0.908542	0.595789	0.912493	0.850025	6864	tags=47%, list=33%, signal=32%	CR2/C4BPB/CR1L/A2M/PTPN6/CR1/VSIG4/FCGR2B	negative regulation of humoral immune response	15	-0.36905	-0.823619	0.678994	1	1	1895	tags=20%, list=10%, signal=18%	SPINK5/C4BPA/SVEP1	0.512573	0.678994	p3_0.51257253384913	p0_0.678994082840237
GO:0002922	positive regulation of humoral immune response	14	-0.848863	-1.98386	5.94554e-05	0.00307165	0.00271437	1875	tags=71%, list=9%, signal=65%	TNF/CR1/LTA/KLK7/PTPRC/CCR7/KLK5/C3/NOD2/IL1B	positive regulation of humoral immune response	20	-0.409899	-1.13021	0.278017	0.760941	0.708848	2588	tags=30%, list=12%, signal=26%	CR1/C3/ZP3/PGC/FCGR2B/FCER2	positive regulation of humoral immune response	11	-0.403944	-0.847188	0.651633	1	1	603	tags=18%, list=3%, signal=18%	C3/PGC	5.94554e-05	0.651633	p3_5.94553702276154e-05	p0_0.651632970451011
GO:0002923	regulation of humoral immune response mediated by circulating immunoglobulin	16	-0.650542	-1.56235	0.030713	0.236718	0.209184	1875	tags=62%, list=9%, signal=57%	TREM2/TNF/CR1/LTA/C4BPA/SVEP1/PTPRC/CR1L/C4BPB/NOD2	regulation of humoral immune response mediated by circulating immunoglobulin	18	-0.268029	-0.726748	0.859539	0.968591	0.902283	2588	tags=39%, list=12%, signal=34%	CR2/C4BPB/CR1L/PTPN6/CR1/FCGR2B/FCER2	regulation of humoral immune response mediated by circulating immunoglobulin	13	0.359975	0.93619	0.519062	1	1	1529	tags=31%, list=8%, signal=28%	TREM2/PTPN6/FCGR2B/CR1	0.030713	0.859539	p3_0.03071301139526	p1_0.859538784067086
GO:0002924	negative regulation of humoral immune response mediated by circulating immunoglobulin	9	-0.580859	-1.23369	0.224	0.567281	0.501298	1805	tags=56%, list=9%, signal=51%	CR1/C4BPA/SVEP1/CR1L/C4BPB	negative regulation of humoral immune response mediated by circulating immunoglobulin	11	-0.320675	-0.753818	0.788913	0.962801	0.896889	6864	tags=55%, list=33%, signal=37%	CR2/C4BPB/CR1L/PTPN6/CR1/FCGR2B	negative regulation of humoral immune response mediated by circulating immunoglobulin	9	-0.423548	-0.863832	0.634557	1	1	775	tags=22%, list=4%, signal=21%	C4BPA/SVEP1	0.224	0.788913	p3_0.224	p1_0.788912579957356
GO:0002931	response to ischemia	59	-0.310882	-0.97697	0.484902	0.76783	0.678519	2881	tags=22%, list=14%, signal=19%	SLC26A5/TREM2/CSF1/HK2/SQSTM1/TP53/RCAN1/SLC8A2/PANX2/HYOU1/CAV3/NPR3/CX3CL1	response to ischemia	62	0.250907	0.871355	0.720137	0.944488	0.87983	1942	tags=15%, list=9%, signal=13%	CSF1R/GJB2/MYB/NPPC/HYOU1/FAIM2/CIB1/SLC8A2/PER2	response to ischemia	57	-0.367206	-1.02449	0.415648	1	1	3047	tags=21%, list=17%, signal=18%	CASP9/RCAN1/KCNJ11/PANX2/MAP2K6/P2RX2/CX3CR1/FAIM2/NPPC/BVES/NDNF/CAV3	0.415648	0.720137	p0_0.415647921760391	p1_0.720136518771331
GO:0003002	regionalization	367	-0.305105	-1.2035	0.0701754	0.344396	0.304338	3230	tags=23%, list=16%, signal=19%	DKK1/CELSR2/TCTN1/BTG2/DMRTA2/APLNR/DMRT2/SIX3/TBR1/TCF15/TDRD5/WNT3A/SHH/MSX2/HOXB9/BMP2/CRB2/HES2/PLXNA2/SNAI1/BHLHE40/FOXG1/PCSK5/NKX3-1/ENKUR/TP53/TGFBR1/GJA1/PAX8/FOXC1/SPRY1/BHLHE41/FGF2/WT1/HHEX/EOMES/CFAP53/DLX1/DCANP1/TLL2/SMO/LFNG/HES1/FOXA1/HOXD3/TBX1/DAW1/LHX1/HES6/RIPPLY1/DNAH11/NTF4/CYP26B1/MDFI/PCSK6/DNAI1/NRARP/LEFTY1/DLX2/TBX20/GATA4/TCAP/ISL1/SOX17/MEOX1/DDIT3/HOXD4/EGR2/IRX1/HH…	regionalization	409	0.231901	1.01379	0.408027	0.832785	0.775774	2862	tags=17%, list=14%, signal=15%	WNT8A/ASCL1/ACVR2A/HOXC4/LHX1/ARL6/ALG5/NOTCH1/TSHZ1/MSX1/PBX2/DNAH11/SUFU/RIPPLY1/RFX3/OTX2/EMX1/BMP2/STIL/SOSTDC1/SIX1/NKX3-1/MEOX1/HOXC6/FOXA2/TMEM107/LEFTY2/FOXJ1/ACVRL1/RPGRIP1L/TP63/NPHP3/ARL13B/HOXA9/DKK1/BHLHE40/BMP1/GDF3/PCGF2/HES4/TGFBR1/PTCH1/NCLN/ALX4/TDRKH/CFAP45/PCSK6/PRICKLE1/WDR19/IRX3/CC2D2A/HOXC8/FRS2/POGLUT1/WNT2/HOXD8/NOTO/HES5/TRA2B/PKD1L1/MAFB/BICC1/KAT2A/RARG/HEYL/GLI1/RELN…	regionalization	307	-0.266471	-0.851104	0.797339	1	1	2496	tags=16%, list=14%, signal=14%	CFAP52/DNAAF3/HOXD9/TDRD6/WNT7B/HNF1B/NKX3-1/GLI2/BTG2/GLI1/GAS8/MSX1/PCSK6/CFAP53/TSHZ1/AURKA/NKX2-1/NOG/NKD1/ROBO2/ASB2/TBX1/GREM1/PTCH1/IRX3/CCDC39/VANGL2/HOXC6/FOXA1/FOLR1/FZD5/WNT2/ANKS6/WNT5A/COBL/FOXF1/IRX2/HOXA6/BMPR1B/WIF1/FGF10/GPC3/SOSTDC1/CXXC4/C3/HHIP/SFRP2/SFRP1/GREM2	0.0701754	0.797339	p3_0.0701754385964912	p0_0.797338792221085
GO:0003007	heart morphogenesis	248	-0.439129	-1.67316	4.16272e-05	0.0022917	0.00202514	2400	tags=27%, list=12%, signal=24%	SNAI1/CPE/COL5A1/COL2A1/TBX19/FLRT2/TP53/NRG1/TGFBR1/NPY1R/GJA1/FOXC1/INSR/SPRY1/TPM1/GAA/PPP1R13L/SLIT2/CHD7/ZFPM1/HEG1/SMO/GATA6/HES1/RYR2/ADAMTS5/DHRS3/TBX1/CAV3/TGFB2/DSP/DNAH11/MYBPC3/JAG1/MYH6/TNNC1/VEGFA/MYH7/TNNT2/LEFTY1/ACTC1/TBX20/MYL3/TNNI3/GATA4/TCAP/ISL1/SOX17/MYL2/SLIT3/NPY2R/GATA3/PKP2/HEY1/ELN/GATA5/HAND2/HEYL/RBM20/SOX18/HAND1/EDN1/HEY2/EFNA1/ANKRD1/VANGL2/NKX2-5/GJA5	heart morphogenesis	258	-0.241671	-1.05194	0.316953	0.791003	0.736852	3285	tags=21%, list=16%, signal=18%	MKKS/ANKRD1/CHD7/MYH7/POU4F1/NIPBL/MED1/IFT52/TBX20/MIB1/BMPR1A/SLIT3/WNT5A/NODAL/MYL3/SMAD2/NOG/CITED2/FOXH1/PITX2/NAGLU/DLC1/PROX1/ADAM15/ALDH1A2/FOXC1/SEMA3C/PLXND1/MIR17/EPHB4/IFT57/MEGF8/TNNC1/IFT172/TBX2/ARID2/SAV1/WNT16/BMP7/SRF/FKBP1A/SETDB2/MDM4/HTR2B/BMPR2/EGLN1/ISL1/MEF2C/EDN1/SOX11/ASB2/BBS5/NRG1/DSP	heart morphogenesis	216	-0.278982	-0.880587	0.690377	1	1	1872	tags=14%, list=10%, signal=13%	NOG/INSR/OLFM1/ROBO2/TTN/ASB2/RBM20/TBX1/PTCH1/ADAMTS1/CCDC39/VANGL2/ADAMTS5/PROX1/TNNC1/RYR2/FOLR1/WNT2/WNT5A/PIM1/FOXF1/SHOX2/MYL3/BMP5/SYNPO2L/CAV3/CLDN5/SFRP2/ANKRD1/HAS2/TNNT2	4.16272e-05	0.690377	p3_4.16272019085319e-05	p0_0.690376569037657
GO:0003009	skeletal muscle contraction	40	-0.581028	-1.70478	0.00913287	0.121822	0.107652	3531	tags=52%, list=17%, signal=43%	REM1/ACTN3/TNNT1/CASQ1/ATP2A1/C12orf57/JSRP1/STAC/GAA/TNF/DMD/NR4A1/MYH14/CAV3/SLC8A3/TNNC1/MYH7/TNNI3/MYH8/TCAP/RCSD1	skeletal muscle contraction	44	-0.359945	-1.19062	0.202151	0.697535	0.649783	4048	tags=34%, list=19%, signal=28%	GSTM2/ATP8A2/DMPK/SCN4A/MYH7/STAC2/C12orf57/PRKD1/STAC/RCSD1/KCNJ2/TNNC1/TNNT1/TNNI2/JSRP1	skeletal muscle contraction	33	-0.40403	-1.03543	0.399474	1	1	3280	tags=33%, list=18%, signal=27%	DMD/STAC2/TNNT3/DMPK/TNNC2/MYH14/NR4A1/TNNC1/GSTM2/KCNJ2/CAV3	0.00913287	0.399474	p3_0.00913287368953817	p0_0.399474375821288
GO:0003012	muscle system process	398	-0.404099	-1.60572	6.03407e-06	0.000424918	0.000375494	2276	tags=25%, list=11%, signal=22%	ACTA2/GATM/SLC6A8/GJA1/CHRNE/TPM1/GAA/PPP1R13L/LMCD1/TNF/SCN3B/CACNA1D/MYH13/TACR1/NPPA/ADRA2A/PDE4D/ADRA1B/ABAT/ABCC8/DCANP1/MIR25/FBXO32/DMD/GATA6/CASQ2/MYH1/NR4A1/KCNE4/CRYAB/JUP/PGAM2/CACNA2D1/RYR2/SLN/TRDN/SULF1/MYH14/MIR214/KLF15/AKAP6/CAV3/ZC3H12A/MYOCD/HRC/DSP/MYH2/MYBPC3/SLC8A3/MYH6/SPX/TNNC1/MLIP/HTR2A/KCNJ3/ACTA1/SULF2/KCNQ1/CKMT2/HCN4/KCNE3/MYH7/SORBS2/TNNT2/CHRNB2/ADRA1A/CHRNA3/TBX20…	muscle system process	419	-0.258967	-1.18792	0.038618	0.360045	0.335397	3358	tags=20%, list=16%, signal=17%	VEGFB/SLMAP/FGF13/MKKS/MYH7/SCN7A/TMOD1/NMU/KCNE4/SOD1/STAC2/C12orf57/GALR2/AKAP6/PRKD1/STAC/PPARA/TBX20/RCSD1/CHRM2/RGS4/KCNJ2/BIN1/GJC1/MYL3/SPX/DLG1/CTNNA3/SCN3B/CACNA1H/EDN2/CHRNG/ATP2A2/ADRA1A/FKBP1B/MEF2A/LMOD2/LMOD3/NR4A3/SGCA/KDM4A/MYOCD/TPCN2/NEUROG1/MYH13/JUP/SCN3A/SCN9A/KCNH2/MIR17/GRIP2/DRD1/DSG2/DOCK4/SSTR2/NOS1AP/MYOG/HTR7/MEIS1/FOXO3/TNNC1/PDE5A/TBX2/ABCC8/SLC8A1/TNNT1/SRF/GSN/TNNI…	muscle system process	338	-0.309695	-0.992426	0.50051	1	1	4192	tags=30%, list=23%, signal=24%	MYLK/ASB3/ZC3H12A/SMAD4/GJA1/TBX3/MYH11/KCND3/HAND2/MYOM2/PLN/PPARA/LMOD3/NUP155/KCNJ8/GUCY1A1/AKAP6/ASPH/CASQ2/TBCE/LMCD1/KCNJ5/ATP1A2/PPP1R12B/DSG2/PROK2/FGF12/SCNN1B/TNNI3K/FLNA/MYL9/DMD/SORBS2/ACTA2/STAC2/CKMT2/BDKRB2/NPNT/TNNT3/SMTN/PGAM2/LMOD1/MKKS/DMPK/TIAM1/CACNA1H/TNNC2/ADA/GHRL/MYOCD/PDE4D/DAPK3/SCN2B/PTGS2/GNAO1/TPM2/MAP2K6/CNN1/GPER1/SCN9A/KCNE3/NR4A3/KIT/ANKRD2/NOS1AP/KCND2/P2RX2/TAC…	6.03407e-06	0.50051	p3_6.03406971033205e-06	p0_0.500509683995923
GO:0003014	renal system process	111	-0.452123	-1.5624	0.00566459	0.0926845	0.0819038	3700	tags=35%, list=18%, signal=29%	F2RL1/SLC15A2/ADCY6/INPP5K/SLC25A23/BMP4/COMT/CHRNB4/SLC4A1/SLC5A2/CTNS/RHPN2/STC1/SGK1/AMN/PCSK5/TACR1/PTPRO/ADGRF5/LGMN/SULF1/PRKACG/SPX/SULF2/KCNQ1/SLC5A1/CHRNB2/NPR3/ATP6V0A4/CHRNA3/CD34/TMEM63C/EDN1/NPPB/PDGFB/HBB/SUCNR1/GJA5/ADORA2A	renal system process	119	-0.170594	-0.67033	0.993056	0.998239	0.929901	4772	tags=21%, list=23%, signal=16%	PRKRIP1/BCR/BCL2/EDNRB/MYO5B/TBC1D8B/MLLT6/PCSK5/AKR1B1/CHRNB4/STK39/NPHS2/CTNS/AGTR1/OXSR1/SPX/SLC5A2/CLDN4/ABCG2/CORIN/GAS6/GSN/ADCY6/EDN1/ADM	renal system process	90	-0.23522	-0.693334	0.896991	1	1	3680	tags=24%, list=20%, signal=20%	ADM/SCNN1B/ATP6V1B1/AQP2/HSD11B2/ABCG2/AGTR1/CYP4F12/CD34/NPR1/AVPR2/CORO2B/TACR1/OPRL1/SERPINF2/HBB/CLDN4/PON3/CORIN/AQP4/CLN3/HAS2	0.00566459	0.993056	p3_0.00566458968824452	p1_0.993055555555556
GO:0003015	heart process	235	-0.406855	-1.5365	0.000724827	0.0220455	0.0194813	2036	tags=26%, list=10%, signal=24%	TPM1/GAA/PPP1R13L/TNF/SCN3B/CACNA1D/NPPA/PDE4D/ADRA1B/MYL7/FYN/DMD/GATA6/CASQ2/KCNE4/SLC8A2/JUP/GJD3/CACNA2D1/RYR2/TRDN/TMIGD3/CAV3/ZC3H12A/TGFB2/HRC/DSP/MYBPC3/SLC8A3/MYH6/APLN/SPX/TNNC1/KCNJ3/KCNQ1/HCN4/KCNE3/MYH7/TNNT2/ACTC1/ADRA1A/MYL3/TNNI3/ATP1A2/GATA4/TCAP/ISL1/PLN/MYL2/CACNA1H/GCH1/CXCR4/PKP2/SGCG/KCND3/EDN1/HEY2/ADM2/ACE2/NKX2-5/GJA5	heart process	248	-0.27831	-1.20948	0.060241	0.487296	0.453937	3430	tags=22%, list=16%, signal=19%	SCN1A/YAP1/VEGFB/FGF13/SLC4A3/MYH7/SCN7A/KCNE4/SOD1/SREBF1/CHRM2/RGS4/KCNJ2/HOPX/BIN1/ADM2/GJC1/MYL3/SPX/DLG1/CTNNA3/SCN3B/CACNA1H/EDN2/EPAS1/GPX1/RPS6KA2/ATP2A2/ADRA1A/FKBP1B/MEF2A/JUP/THRA/SCN3A/SCN9A/KCNH2/DSG2/EXT2/NOS1AP/TNNC1/PDE5A/TBX2/CELF2/SLC8A1/CORIN/GSN/TNNI2/UCN/ISL1/EDN1/CXADR/NEDD4L/DSP/SCN4B/ADM	heart process	191	-0.378746	-1.1891	0.188819	1	1	4165	tags=30%, list=23%, signal=23%	ASB3/ZC3H12A/GJA1/TBX5/KCND3/PLN/NUP155/KCNJ8/CASQ2/KCNJ5/ATP1A2/TGFB2/HSPB7/ADM/DSG2/FGF12/TNNI3K/ISL1/FLNA/DMD/RPS6KA2/DMPK/CACNA1H/ADA/PDE4D/SCN2B/MAP2K6/SCN9A/KCNE3/NOS1AP/KCND2/TTN/KCNJ12/CACNB2/IRX3/ACE2/SCN3B/DES/TNNC1/RYR2/GSTM2/SCN2A/CXADR/SHOX2/BVES/KCNJ2/CORIN/HBEGF/MYL3/CACNA1D/ADRB1/SCN3A/CAV3/SCN7A/TNNT2/AVPR1A/GPX1	0.000724827	0.188819	p3_0.000724827367271823	p0_0.188818565400844
GO:0003016	respiratory system process	36	0.292336	0.863179	0.704348	0.889618	0.786141	2345	tags=17%, list=12%, signal=15%	DNAH9/NLGN3/CCBE1/HOXA5/ADORA1/PBX3	respiratory system process	40	-0.341712	-1.10559	0.287582	0.765967	0.71353	1284	tags=35%, list=6%, signal=33%	ADH5/ZFAND5/NLGN2/GLS/CFAP221/MECP2/CCBE1/FKRP/CFAP43/STK40/TNNC1/SPAG16/MTG2/HIPK2	respiratory system process	33	-0.423743	-1.08595	0.346912	1	1	4992	tags=36%, list=28%, signal=26%	ADH5/NDN/MECP2/CFAP54/JAG2/ATP1A2/DNAH9/NEK10/FLT4/TNNC1/RAB3A/CCBE1	0.287582	0.704348	p1_0.287581699346405	p3_0.704347826086957
GO:0003018	vascular process in circulatory system	245	-0.494751	-1.88495	1.4536e-07	1.57549e-05	1.39223e-05	3347	tags=33%, list=17%, signal=28%	ITGA1/TRPV4/MFSD2A/UTS2/UCN/SLC2A3/ADORA2B/AVPR1B/EDN2/FGG/HTR1D/TJP3/SLC22A5/CALCA/TACR2/ADRB1/SLC29A4/SLC24A3/FAAH/MYLK3/RAMP2/HTR7/SLC38A1/ATP2A3/ACTA2/ECE1/SLCO2B1/FOXC1/INSR/MANF/SLIT2/ABCB1/TNF/TACR1/PDE2A/KCNMB4/SLC1A5/NPPA/KEL/ADRA2A/ADRA1B/GPR4/ABCC8/SLC2A4/SLC8A2/CBS/SLC22A3/SVEP1/SLC6A13/SLC7A5/AZU1/SLCO1C1/VEGFA/HTR2A/SLC7A2/SLC2A1/SLC1A4/SLC5A1/ADRA1A/SOD2/ATP1A2/SLC22A2/SLC6A4/PDE3A…	vascular process in circulatory system	265	-0.304179	-1.32254	0.00689137	0.144181	0.134311	2318	tags=20%, list=11%, signal=18%	MMP2/SLC38A2/AGTR1/SOD1/SLC12A2/SCPEP1/SLC29A2/KCNMB2/CTNNBIP1/EDN2/GPX1/ADRA1A/SLC5A5/VSTM4/ARHGAP35/FOXC1/ECE1/FGA/EGFR/SLC6A6/CEACAM1/BMP6/ITGA4/SLC7A5/GRIP2/DRD1/DOCK4/EXT2/SLC1A4/HTR7/ABCG2/ABCC8/SLC8A1/P2RY2/KCNMB4/SLC2A3/ADCY6/UCN/PDE2A/HTR2B/BMPR2/CD36/SLC6A9/ADRB2/SOD2/EDN1/OCLN/LEPR/SLC38A1/GCLM/TFRC/SLC2A1/ADM	vascular process in circulatory system	213	-0.3286	-1.03584	0.416579	1	1	4075	tags=29%, list=22%, signal=22%	AKAP12/EGFR/KCNMB1/KCNJ8/GUCY1A1/CD36/GCLM/DDAH1/ATP1A2/ADM/SCNN1B/FERMT2/ABCG2/AGTR1/VSTM4/ACTA2/BDKRB2/LEPR/MKKS/SLC5A3/SLC19A1/SLC6A9/SOD2/NPR1/SLC27A4/AVPR2/MYLK3/PTGS2/SLC7A1/GPER1/SLC38A1/PDE2A/KAT2B/SLC7A5/TACR1/INSR/SLC4A4/SERPINF2/HBB/DOCK4/FGG/SLC29A2/ACE2/CD38/NPPC/NTS/CALCA/TJP2/AGER/C2CD4B/ADRA2C/ADRB1/SVEP1/SLC16A12/SLC6A4/CDH5/CLDN5/RAMP2/ADRA2A/AVPR1A/GPX1	1.4536e-07	0.416579	p3_1.45359544148318e-07	p0_0.416579223504722
GO:0003044	regulation of systemic arterial blood pressure mediated by a chemical signal	40	-0.487423	-1.43014	0.0674606	0.339095	0.299653	3700	tags=45%, list=18%, signal=37%	F2RL1/RASL10B/COMT/AVPR1B/EDN2/ADRB1/ECE1/PCSK5/TPM1/TACR1/CPA3/ADRA1B/NOX1/ADRA1A/SOD2/EDN1/ACE2/SUCNR1	regulation of systemic arterial blood pressure mediated by a chemical signal	47	-0.274789	-0.920767	0.592275	0.910692	0.848348	2283	tags=19%, list=11%, signal=17%	EDN2/SLC2A5/RPS6KA2/ADRA1A/ECE1/CORIN/ADRB2/SOD2/EDN1	regulation of systemic arterial blood pressure mediated by a chemical signal	35	-0.411926	-1.07157	0.368421	1	1	3415	tags=40%, list=19%, signal=33%	HSD11B2/AGTR1/RPS6KA2/SOD2/AVPR2/TACR1/SERPINF2/ACE2/RASL10B/CORIN/CTSG/CPA3/ADRB1/AVPR1A	0.0674606	0.592275	p3_0.0674605703632526	p1_0.592274678111588
GO:0003071	renal system process involved in regulation of systemic arterial blood pressure	22	-0.479977	-1.26263	0.162835	0.49541	0.437786	64	tags=23%, list=0%, signal=23%	PCSK5/PTPRO/PDGFB/SUCNR1/GJA5	renal system process involved in regulation of systemic arterial blood pressure	25	0.33546	0.953382	0.517304	0.881181	0.820856	3703	tags=24%, list=18%, signal=20%	SUCNR1/F2RL1/COMT/CYP11B2/CORO2B/HSD11B2	renal system process involved in regulation of systemic arterial blood pressure	18	0.462935	1.27406	0.164336	1	1	2816	tags=39%, list=16%, signal=33%	F2R/F2RL1/AGT/GAS6/PTPRO/GJA5/COMT	0.162835	0.517304	p3_0.162835249042146	p1_0.517304189435337
GO:0003073	regulation of systemic arterial blood pressure	85	-0.470162	-1.54756	0.00913537	0.121822	0.107652	3213	tags=40%, list=16%, signal=34%	PRCP/F2RL1/KCNK6/RASL10B/COMT/AVPR1B/EDN2/KLK1/CALCA/ADRB1/ECE1/PCSK5/MANF/TPM1/TNF/TACR1/CPA3/NPPA/ADRA1B/PTPRO/SPX/IER3/NOX1/ADRA1A/TNNI3/SOD2/GPR37L1/EDN1/NPPB/ADM2/PDGFB/ACE2/SUCNR1/GJA5	regulation of systemic arterial blood pressure	96	-0.297431	-1.12992	0.234742	0.722827	0.673344	2600	tags=20%, list=12%, signal=17%	ADM2/SPX/EDN2/SLC2A5/RPS6KA2/ADRA1A/NTSR1/ECE1/MIR17/WNK1/AR/CORIN/GAS6/IER3/BMPR2/ADRB2/SOD2/EDN1/ADM	regulation of systemic arterial blood pressure	68	-0.346152	-0.988174	0.463647	1	1	3721	tags=34%, list=21%, signal=27%	DDAH1/ADM/HSD11B2/AGTR1/RPS6KA2/CYP4F12/NCALD/SOD2/AVPR2/CORO2B/P2RX2/TACR1/IER3/SERPINF2/ACE2/RASL10B/KL/CORIN/CTSG/CALCA/CPA3/ADRB1/AVPR1A	0.00913537	0.463647	p3_0.00913536818458782	p0_0.463647199046484
GO:0003081	regulation of systemic arterial blood pressure by renin-angiotensin	24	-0.468714	-1.25361	0.185687	0.519896	0.459424	2259	tags=38%, list=11%, signal=33%	ATP6AP2/F2RL1/COMT/PCSK5/TACR1/CPA3/NOX1/ACE2/SUCNR1	regulation of systemic arterial blood pressure by renin-angiotensin	25	0.360632	1.02492	0.408015	0.832785	0.775774	1614	tags=12%, list=8%, signal=11%	SUCNR1/F2RL1/COMT	regulation of systemic arterial blood pressure by renin-angiotensin	21	0.337202	0.985511	0.469178	1	1	431	tags=19%, list=2%, signal=19%	F2R/ENPEP/F2RL1/AGT	0.185687	0.469178	p3_0.18568665377176	p0_0.469178082191781
GO:0003084	positive regulation of systemic arterial blood pressure	8	-0.379237	-0.781071	0.756757	0.911349	0.805345	2045	tags=25%, list=10%, signal=22%	MANF/SPX	positive regulation of systemic arterial blood pressure	12	0.403213	0.961963	0.507463	0.874877	0.814984	5346	tags=50%, list=25%, signal=37%	MANF/AVPR1A/CYP11B2/HSD11B2/NR2F2/RHOA	positive regulation of systemic arterial blood pressure	8	-0.662119	-1.31502	0.149137	1	1	3415	tags=38%, list=19%, signal=30%	HSD11B2/AVPR2/AVPR1A	0.149137	0.756757	p0_0.149136577708006	p3_0.756756756756757
GO:0003085	negative regulation of systemic arterial blood pressure	20	-0.444001	-1.14456	0.289827	0.627198	0.554245	2785	tags=55%, list=14%, signal=47%	PRCP/KCNK6/CALCA/ADRB1/TNF/NPPA/IER3/ADRA1A/SOD2/GPR37L1/NPPB	negative regulation of systemic arterial blood pressure	23	-0.523349	-1.47969	0.0296236	0.298753	0.2783	2109	tags=29%, list=10%, signal=26%	ADRA1A/NTSR1/MIR17/IER3/BMPR2/ADRB2/SOD2	negative regulation of systemic arterial blood pressure	13	-0.554869	-1.19199	0.260212	1	1	2885	tags=38%, list=16%, signal=32%	SOD2/IER3/KL/CALCA/ADRB1	0.0296236	0.289827	p1_0.029623555714351	p3_0.289827255278311
GO:0003091	renal water homeostasis	21	0.366221	0.958878	0.520921	0.789883	0.698007	2015	tags=19%, list=10%, signal=17%	HAS2/AQP1/AQP3/AQP6	renal water homeostasis	24	0.251861	0.710889	0.882033	0.972253	0.905694	6377	tags=46%, list=30%, signal=32%	HAS2/HYAL2/CYP11B2/CYP4F2/UMOD/AQP3/INPP5K/AQP6/AQP4/CYP4A11/AKAP11	renal water homeostasis	18	-0.468655	-1.0923	0.329609	1	1	4233	tags=33%, list=23%, signal=26%	HYAL2/ATP6V1B1/AQP2/CYP4F12/AQP4/HAS2	0.329609	0.882033	p0_0.329608938547486	p1_0.882032667876588
GO:0003094	glomerular filtration	23	-0.641886	-1.70712	0.00771255	0.110531	0.0976745	1466	tags=39%, list=7%, signal=36%	PTPRO/ADGRF5/SULF1/SULF2/CD34/TMEM63C/EDN1/PDGFB/GJA5	glomerular filtration	23	-0.266153	-0.752505	0.85177	0.967806	0.901552	780	tags=39%, list=4%, signal=38%	AQP1/ADORA1/RHPN2/F2R/MCAM/TBC1D8B/NPHS2/GAS6/EDN1	glomerular filtration	24	0.596909	1.80398	0.00626371	0.464861	0.464861	2799	tags=42%, list=15%, signal=35%	SULF1/F2R/F2RL1/ADGRF5/GAS6/PTPRO/SULF2/TBC1D8B/MYO1E/GJA5	0.00626371	0.85177	p0_0.00626370634176925	p1_0.851769911504425
GO:0003096	renal sodium ion transport	14	-0.492211	-1.15034	0.28932	0.626901	0.553983	661	tags=36%, list=3%, signal=35%	ATP6V1B1/WNK4/SGK1/KCNQ1/EDN1	renal sodium ion transport	15	0.361328	0.915099	0.585821	0.90883	0.846612	745	tags=13%, list=4%, signal=13%	WNK4/SLC12A3	renal sodium ion transport	11	-0.252804	-0.530202	0.968896	1	1	3555	tags=45%, list=20%, signal=37%	MAGED2/EDNRA/OXSR1/ATP6V1B1/PON3	0.28932	0.968896	p3_0.289320388349515	p0_0.968895800933126
GO:0003128	heart field specification	17	-0.396804	-0.977374	0.496169	0.777154	0.686759	4453	tags=41%, list=22%, signal=32%	ROBO1/EXT1/BMP4/DKK1/BMP2/ISL1/GATA5	heart field specification	17	-0.372697	-0.995947	0.461053	0.848931	0.790814	3472	tags=41%, list=17%, signal=34%	BMP4/MESP1/RBPJ/WNT5A/FOXH1/ISL1/MEF2C	heart field specification	14	-0.288195	-0.628813	0.89881	1	1	3524	tags=43%, list=19%, signal=35%	WNT11/GATA5/ISL1/AXIN2/ROBO2/WNT5A	0.461053	0.89881	p1_0.461052631578947	p0_0.898809523809524
GO:0003139	secondary heart field specification	11	-0.317749	-0.708205	0.839844	0.950052	0.839546	430	tags=45%, list=2%, signal=45%	AXIN2/SMARCD3/FOXH1/BMP4/ISL1	secondary heart field specification	11	-0.636746	-1.49681	0.0349421	0.336878	0.313816	5175	tags=64%, list=25%, signal=48%	BMP4/MESP1/RBPJ/WNT5A/FOXH1/ISL1/MEF2C	secondary heart field specification	9	-0.320976	-0.654635	0.862385	1	1	3524	tags=44%, list=19%, signal=36%	WNT11/ISL1/AXIN2/WNT5A	0.0349421	0.862385	p1_0.0349421322472797	p0_0.862385321100917
GO:0003143	embryonic heart tube morphogenesis	67	-0.461898	-1.46592	0.0150695	0.157902	0.139535	1502	tags=16%, list=7%, signal=15%	SMO/HES1/RYR2/TBX20/GATA4/SOX17/HAND2/SOX18/HAND1/VANGL2/NKX2-5	embryonic heart tube morphogenesis	72	-0.328228	-1.17306	0.185882	0.686034	0.639069	5157	tags=38%, list=25%, signal=28%	TGFBR2/PKD2/APLNR/MESP1/TBX6/HAND2/OVOL2/DVL2/FOLR1/YAP1/MKKS/IFT52/TBX20/MIB1/WNT5A/NODAL/CITED2/FOXH1/IFT57/MEGF8/IFT172/TBX2/SRF/SETDB2/MEF2C/ASB2/BBS5	embryonic heart tube morphogenesis	56	0.212087	0.77887	0.887097	1	1	3663	tags=25%, list=20%, signal=20%	SOX18/ENG/MESP1/C2CD3/CITED2/IFT172/DNAAF1/ACVR1/DVL2/TBX6/NPHP3/RNF207/SMAD3/APLNR	0.0150695	0.887097	p3_0.0150694563480771	p0_0.887096774193548
GO:0003148	outflow tract septum morphogenesis	24	-0.48456	-1.29599	0.162476	0.495112	0.437523	1467	tags=25%, list=7%, signal=23%	GATA6/TBX1/TGFB2/TBX20/ISL1/NKX2-5	outflow tract septum morphogenesis	24	-0.447302	-1.28767	0.128603	0.624904	0.582124	6996	tags=67%, list=33%, signal=45%	LRP2/SMAD6/MSX2/FGF8/NRP1/ENG/BMP4/TGFBR2/FGFR2/NRP2/SMAD4/TBX20/BMPR1A/SEMA3C/TBX2/ISL1	outflow tract septum morphogenesis	20	-0.263597	-0.618856	0.917847	1	1	4103	tags=35%, list=23%, signal=27%	SMAD4/FGFR2/TGFB2/ISL1/ZFPM2/ROBO2/TBX1	0.128603	0.917847	p1_0.12860310421286	p0_0.917847025495751
GO:0003151	outflow tract morphogenesis	79	-0.488094	-1.59856	0.005427	0.0899171	0.0794584	2160	tags=28%, list=11%, signal=25%	NPY1R/FOXC1/ZFPM1/GATA6/HES1/DHRS3/TBX1/TGFB2/JAG1/VEGFA/TBX20/ISL1/SOX17/NPY2R/ELN/HAND2/HEYL/SOX18/EDN1/HEY2/NKX2-5/GJA5	outflow tract morphogenesis	80	-0.330425	-1.20273	0.142169	0.644247	0.600143	5175	tags=38%, list=25%, signal=29%	BMP4/TGFBR2/ZFPM1/FGFR2/FZD1/NPY2R/NRP2/HAND2/DVL2/FOLR1/SMAD4/RBPJ/NIPBL/TBX20/BMPR1A/WNT5A/NOG/CITED2/FOXH1/PITX2/FOXC1/SEMA3C/PLXND1/MIR17/TBX2/BMP7/BMPR2/ISL1/MEF2C/EDN1/SOX11	outflow tract morphogenesis	69	-0.228223	-0.653754	0.927639	1	1	4806	tags=41%, list=27%, signal=30%	CDC42/NPY1R/HEY2/TWIST1/HES1/RYR1/WNT11/ILK/VEGFA/PRICKLE1/FOXC1/SMAD4/TBX3/HAND2/SOX17/FGFR2/TGFB2/ISL1/ZFPM2/TGFBR3/NPY5R/NOG/ROBO2/TBX1/FOLR1/WNT5A/CLDN5/SFRP2	0.005427	0.927639	p3_0.00542700082475869	p0_0.927639383155397
GO:0003156	regulation of animal organ formation	28	0.307046	0.861719	0.713983	0.893364	0.789451	2509	tags=25%, list=12%, signal=22%	FGF10/ROBO2/WNT2/WNT5A/BMP7/SIX1/FGF1	regulation of animal organ formation	28	0.288899	0.843224	0.71719	0.943455	0.878867	2039	tags=18%, list=10%, signal=16%	BMP2/SIX1/DKK1/FRS2/WNT2	regulation of animal organ formation	22	0.414936	1.22976	0.206294	1	1	1206	tags=27%, list=7%, signal=25%	SULF1/SIX1/MESP1/CITED2/FGF1/WT1	0.206294	0.71719	p0_0.206293706293706	p1_0.717190388170055
GO:0003157	endocardium development	11	-0.658936	-1.46865	0.0664062	0.336069	0.296979	2206	tags=36%, list=11%, signal=32%	NRG1/KDR/SOX17/SOX18	endocardium development	12	0.343011	0.818335	0.720149	0.944488	0.87983	1659	tags=25%, list=8%, signal=23%	NOTCH1/KDR/STK3	endocardium development	11	0.304975	0.759267	0.78273	1	1	77	tags=9%, list=0%, signal=9%	SOX18	0.0664062	0.78273	p3_0.06640625	p0_0.782729805013928
GO:0003158	endothelium development	129	-0.555838	-1.95705	2.45788e-06	0.000188046	0.000166173	1957	tags=22%, list=10%, signal=20%	PECAM1/TNF/PDE2A/HEG1/ATOH8/PDE4D/PROC/JAG1/PPP1R16B/VEGFA/KDR/CXCL10/CD34/SOX17/CXCR4/F11R/TIE1/HEY1/CLDN1/SOX18/ICAM1/EDN1/HEY2/CEACAM1/CDH5/BMP6/GJA5/IL1B/GJA4	endothelium development	130	0.321364	1.253	0.0770548	0.526344	0.490311	2862	tags=20%, list=14%, signal=17%	MYADM/SCUBE1/NOTCH1/PECAM1/ROBO4/MYD88/GJA4/PDPN/MSN/TJP2/F2RL1/ACVRL1/TIE1/CDH5/KDR/NOTCH4/FSTL1/CLDN5/XDH/NDP/CLIC4/RAP1B/STARD13/ZEB1/PRKD2/DLL1	endothelium development	124	-0.344563	-1.04656	0.406667	1	1	4814	tags=31%, list=27%, signal=23%	ZEB1/ROCK2/VEGFA/ACVR2B/COL27A1/NRG1/S1PR3/MYD88/RAP1A/RHOB/SMAD4/RAPGEF3/RAPGEF1/DLL4/SOX17/ROBO4/CLDN3/TNMD/CD34/ICAM1/PDE4D/MARVELD2/ETV2/SLC40A1/PLCB1/S1PR2/ADAMTS12/PDE2A/TIE1/KDR/PROX1/SCUBE1/PDPN/TJP2/CDH5/CLDN5/PTPRS/GPX1	2.45788e-06	0.406667	p3_2.45788236013025e-06	p0_0.406666666666667
GO:0003159	morphogenesis of an endothelium	16	-0.396687	-0.95269	0.525292	0.792567	0.700379	627	tags=19%, list=3%, signal=18%	ITGAX/CXCL10/CXCR4	morphogenesis of an endothelium	16	0.358581	0.916123	0.575758	0.907327	0.845213	7745	tags=50%, list=37%, signal=32%	ACVRL1/STARD13/PRKD2/FGF1/RHOA/CSNK2B/DLL4/ITGAX	morphogenesis of an endothelium	16	0.413726	1.12292	0.282468	1	1	1503	tags=19%, list=8%, signal=17%	CXCR4/FGF1/PRKD2	0.282468	0.575758	p0_0.282467532467532	p1_0.575757575757576
GO:0003161	cardiac conduction system development	36	-0.562336	-1.62127	0.00981954	0.126842	0.112088	1658	tags=33%, list=8%, signal=31%	GJA1/NPPA/GATA6/HCN4/GATA4/ISL1/MSC/HEY1/HEY2/NPPB/NKX2-5/GJA5	cardiac conduction system development	37	0.256489	0.799443	0.789855	0.962996	0.897071	3017	tags=16%, list=14%, signal=14%	NOTCH1/MSX1/GJB6/IRX3/CDC42/SMAD5	cardiac conduction system development	30	-0.334516	-0.851157	0.62533	1	1	4103	tags=60%, list=23%, signal=46%	SMAD5/MSC/CDC42/HEY2/SMAD1/CACNA1G/SMAD4/GJA1/TBX3/TBX5/KCNJ8/ID2/DSG2/ISL1/MSX1/IRX3/SHOX2/BVES	0.00981954	0.789855	p3_0.00981954343529758	p1_0.789855072463768
GO:0003163	sinoatrial node development	11	-0.368059	-0.820337	0.707031	0.89088	0.787257	1467	tags=45%, list=7%, signal=42%	TBX18/BMP4/GATA6/HCN4/ISL1	sinoatrial node development	12	-0.309072	-0.743493	0.809013	0.965772	0.899657	5175	tags=42%, list=25%, signal=31%	BMP4/TBX18/MESP1/CACNA1G/ISL1	sinoatrial node development	10	-0.393104	-0.814831	0.675841	1	1	4070	tags=50%, list=22%, signal=39%	TBX3/TBX5/ISL1/SHOX2/BVES	0.675841	0.809013	p0_0.675840978593272	p1_0.809012875536481
GO:0003170	heart valve development	72	-0.560208	-1.80874	0.00055011	0.0178315	0.0157574	1981	tags=28%, list=10%, signal=25%	SLIT2/PDE2A/ZFPM1/NPPA/ADAMTS5/TGFB2/JAG1/TBX20/GATA4/SLIT3/GATA3/TIE1/HEY1/ELN/GATA5/HEYL/HEY2/EFNA1/NKX2-5/GJA5	heart valve development	72	0.291737	1.03706	0.381282	0.813438	0.757751	3674	tags=22%, list=17%, signal=18%	OLFM1/NOTCH1/STRA6/TGFB1/BMP2/TIE1/DKK1/EFNA1/NOS3/HEYL/SOX9/RB1/FGFRL1/SNAI1/ROCK1/NFATC1	heart valve development	66	0.240825	0.913201	0.627219	1	1	3263	tags=24%, list=18%, signal=20%	STRA6/GATA3/CDH11/SNAI1/PRDM1/TGFB1/SLIT3/SMAD6/ACVR1/SOX9/SCX/BMP4/HEY1/GJA5/ROBO1/SNAI2	0.00055011	0.627219	p3_0.000550110318413908	p0_0.627218934911243
GO:0003171	atrioventricular valve development	28	-0.661765	-1.8149	0.00151359	0.0380081	0.0335872	902	tags=36%, list=4%, signal=34%	ZFPM1/TGFB2/TBX20/GATA4/SLIT3/HEY1/HEYL/HEY2/EFNA1/GJA5	atrioventricular valve development	28	0.286936	0.837495	0.724584	0.946394	0.881605	2768	tags=18%, list=13%, signal=16%	OLFM1/NOTCH1/BMP2/EFNA1/HEYL	atrioventricular valve development	26	-0.219647	-0.539646	0.963989	1	1	4103	tags=38%, list=23%, signal=30%	HEY2/TWIST1/NAGLU/SMAD4/TBX5/TGFB2/AXIN2/DCHS1/EFNA1/OLFM1	0.00151359	0.963989	p3_0.00151358763533499	p0_0.96398891966759
GO:0003174	mitral valve development	13	-0.574342	-1.33215	0.135238	0.456275	0.403203	1704	tags=69%, list=8%, signal=63%	BMPR2/SMAD6/SOX4/NOTCH1/ACVR1/NAGLU/ZFPM1/EFNA1/GJA5	mitral valve development	13	0.278712	0.678474	0.885553	0.972364	0.905797	1848	tags=15%, list=9%, signal=14%	NOTCH1/EFNA1	mitral valve development	13	-0.264436	-0.568069	0.954614	1	1	3042	tags=38%, list=17%, signal=32%	TWIST1/NAGLU/AXIN2/DCHS1/EFNA1	0.135238	0.954614	p3_0.135238095238095	p0_0.954614220877458
GO:0003176	aortic valve development	43	-0.643443	-1.89051	0.000463957	0.0154704	0.0136709	1981	tags=42%, list=10%, signal=38%	BMP2/SNAI1/SLIT2/NPPA/ADAMTS5/JAG1/TBX20/GATA4/SLIT3/GATA3/TIE1/HEY1/ELN/GATA5/HEYL/HEY2/EFNA1/NKX2-5	aortic valve development	43	0.384436	1.23221	0.148423	0.6534	0.608669	3674	tags=27%, list=17%, signal=23%	NOTCH1/TGFB1/BMP2/TIE1/EFNA1/NOS3/HEYL/SOX9/RB1/SNAI1/ROCK1/NFATC1	aortic valve development	39	0.262935	0.887897	0.621145	1	1	3263	tags=28%, list=18%, signal=23%	GATA3/CDH11/SNAI1/TGFB1/SLIT3/SMAD6/SOX9/BMP4/HEY1/ROBO1/SNAI2	0.000463957	0.621145	p3_0.000463957349364181	p0_0.621145374449339
GO:0003177	pulmonary valve development	23	-0.630202	-1.67604	0.0111088	0.136304	0.12045	1159	tags=39%, list=6%, signal=37%	SLIT2/ADAMTS5/TGFB2/JAG1/TBX20/HEY1/HEYL/HEY2/GJA5	pulmonary valve development	23	0.324655	0.910095	0.590909	0.910334	0.848014	3674	tags=22%, list=17%, signal=18%	NOTCH1/STRA6/NOS3/HEYL/NFATC1	pulmonary valve development	22	0.344975	1.02242	0.41958	1	1	3055	tags=27%, list=17%, signal=23%	STRA6/SMAD6/BMP4/HEY1/GJA5/ROBO1	0.0111088	0.590909	p3_0.0111088179522477	p1_0.590909090909091
GO:0003179	heart valve morphogenesis	60	-0.606574	-1.91621	0.000215668	0.00869778	0.00768609	1981	tags=32%, list=10%, signal=29%	SLIT2/ZFPM1/NPPA/ADAMTS5/TGFB2/JAG1/TBX20/GATA4/SLIT3/GATA3/TIE1/HEY1/ELN/GATA5/HEYL/HEY2/EFNA1/NKX2-5/GJA5	heart valve morphogenesis	60	0.333218	1.14812	0.214777	0.706881	0.658488	3674	tags=25%, list=17%, signal=20%	OLFM1/NOTCH1/STRA6/TGFB1/BMP2/TIE1/EFNA1/NOS3/HEYL/SOX9/RB1/FGFRL1/SNAI1/ROCK1/NFATC1	heart valve morphogenesis	56	0.280075	1.02855	0.370968	1	1	3263	tags=27%, list=18%, signal=22%	STRA6/GATA3/CDH11/SNAI1/TGFB1/SLIT3/SMAD6/ACVR1/SOX9/SCX/BMP4/HEY1/GJA5/ROBO1/SNAI2	0.000215668	0.370968	p3_0.000215668184508921	p0_0.370967741935484
GO:0003180	aortic valve morphogenesis	38	-0.689843	-1.99344	0.000155499	0.00675392	0.00596834	1981	tags=45%, list=10%, signal=40%	SNAI1/SLIT2/NPPA/ADAMTS5/JAG1/TBX20/GATA4/SLIT3/GATA3/TIE1/HEY1/ELN/GATA5/HEYL/HEY2/EFNA1/NKX2-5	aortic valve morphogenesis	38	0.429331	1.35072	0.095064	0.559227	0.520943	3674	tags=28%, list=17%, signal=23%	NOTCH1/TGFB1/TIE1/EFNA1/NOS3/HEYL/SOX9/RB1/SNAI1/ROCK1/NFATC1	aortic valve morphogenesis	34	0.287237	0.929571	0.562771	1	1	3263	tags=32%, list=18%, signal=27%	GATA3/CDH11/SNAI1/TGFB1/SLIT3/SMAD6/SOX9/BMP4/HEY1/ROBO1/SNAI2	0.000155499	0.562771	p3_0.000155498898127039	p0_0.562770562770563
GO:0003181	atrioventricular valve morphogenesis	25	-0.611272	-1.63896	0.0179817	0.174534	0.154233	1704	tags=32%, list=8%, signal=29%	ZFPM1/TGFB2/GATA4/SLIT3/HEY1/HEYL/HEY2/EFNA1	atrioventricular valve morphogenesis	25	0.31692	0.900691	0.617486	0.916355	0.853623	2768	tags=20%, list=13%, signal=17%	OLFM1/NOTCH1/BMP2/EFNA1/HEYL	atrioventricular valve morphogenesis	24	-0.260958	-0.639811	0.917127	1	1	5759	tags=42%, list=32%, signal=28%	HEY2/TWIST1/NAGLU/SMAD4/TBX5/TGFB2/AXIN2/DCHS1/EFNA1/OLFM1	0.0179817	0.917127	p3_0.0179817366159461	p0_0.917127071823204
GO:0003183	mitral valve morphogenesis	12	-0.474644	-1.08877	0.367232	0.691679	0.611226	5455	tags=67%, list=27%, signal=49%	BMPR2/SMAD6/SOX4/NOTCH1/ACVR1/NAGLU/ZFPM1/EFNA1	mitral valve morphogenesis	12	0.28267	0.674376	0.897388	0.976832	0.90996	1848	tags=17%, list=9%, signal=15%	NOTCH1/EFNA1	mitral valve morphogenesis	12	-0.31189	-0.664452	0.85474	1	1	3042	tags=50%, list=17%, signal=42%	BMPR2/TWIST1/NAGLU/AXIN2/DCHS1/EFNA1	0.367232	0.897388	p3_0.367231638418079	p1_0.897388059701492
GO:0003184	pulmonary valve morphogenesis	19	-0.689447	-1.74889	0.00976798	0.126631	0.111902	1159	tags=47%, list=6%, signal=45%	SLIT2/ADAMTS5/TGFB2/JAG1/TBX20/HEY1/HEYL/HEY2/GJA5	pulmonary valve morphogenesis	19	0.466515	1.24265	0.19137	0.687393	0.640335	3674	tags=26%, list=17%, signal=22%	NOTCH1/STRA6/NOS3/HEYL/NFATC1	pulmonary valve morphogenesis	18	0.38478	1.05897	0.388112	1	1	3055	tags=33%, list=17%, signal=28%	STRA6/SMAD6/BMP4/HEY1/GJA5/ROBO1	0.00976798	0.388112	p3_0.00976798368483991	p0_0.388111888111888
GO:0003188	heart valve formation	16	-0.744127	-1.78711	0.00363871	0.0699829	0.0618428	545	tags=44%, list=3%, signal=43%	ZFPM1/TBX20/GATA4/HEY1/HEY2/EFNA1/GJA5	heart valve formation	16	0.469882	1.20048	0.238636	0.726993	0.677224	2992	tags=24%, list=14%, signal=20%	OLFM1/NOTCH1/EFNA1/SOX9	heart valve formation	14	0.317154	0.836745	0.669697	1	1	2799	tags=36%, list=15%, signal=30%	CDH11/SOX9/SCX/HEY1/GJA5	0.00363871	0.669697	p3_0.00363870652477183	p0_0.66969696969697
GO:0003197	endocardial cushion development	51	-0.397566	-1.21267	0.159341	0.49066	0.433588	1159	tags=35%, list=6%, signal=33%	BMP4/DKK1/APLNR/MSX2/BMP2/SNAI1/TGFBR1/ADAMTS5/CRELD1/TGFB2/JAG1/TBX20/GATA4/ISL1/HEY1/GATA5/HEYL/HEY2	endocardial cushion development	51	-0.280514	-0.954487	0.541387	0.89079	0.829808	2915	tags=27%, list=14%, signal=24%	SMAD4/RBPJ/ERBB3/TBX20/BMPR1A/SMAD2/NOG/CITED2/CRELD1/TBX2/BMP7/MDM4/BMPR2/ISL1	endocardial cushion development	48	-0.286439	-0.781024	0.758491	1	1	4103	tags=29%, list=23%, signal=23%	SMAD4/TBX3/TBX5/TGFB2/ISL1/DCHS1/ERBB3/MSX1/NOG/ROBO2/ADAMTS5/FOXF1/RBM24/BMP5	0.159341	0.758491	p3_0.159340659340659	p0_0.758490566037736
GO:0003198	epithelial to mesenchymal transition involved in endocardial cushion formation	15	-0.606347	-1.44292	0.0793037	0.364307	0.321932	2784	tags=40%, list=14%, signal=35%	MSX2/SNAI1/TGFBR1/TGFB2/HEYL/HEY2	epithelial to mesenchymal transition involved in endocardial cushion formation	15	0.536073	1.35766	0.119403	0.606435	0.564919	3506	tags=33%, list=17%, signal=28%	NOTCH1/MSX1/TGFBR1/HEYL/SNAI1	epithelial to mesenchymal transition involved in endocardial cushion formation	14	0.318236	0.839598	0.663636	1	1	3263	tags=29%, list=18%, signal=23%	ENG/SNAI1/MSX2/SNAI2	0.0793037	0.663636	p3_0.0793036750483559	p0_0.663636363636364
GO:0003203	endocardial cushion morphogenesis	40	-0.393443	-1.15439	0.232472	0.574931	0.508058	1159	tags=30%, list=6%, signal=28%	MSX2/BMP2/SNAI1/TGFBR1/ADAMTS5/TGFB2/TBX20/ISL1/HEY1/GATA5/HEYL/HEY2	endocardial cushion morphogenesis	40	0.277909	0.881648	0.653775	0.923984	0.860729	3506	tags=22%, list=17%, signal=19%	NOTCH1/MSX1/BMP2/ACVRL1/TGFBR1/NOS3/HEYL/SOX9/SNAI1	endocardial cushion morphogenesis	39	-0.229803	-0.602163	0.944516	1	1	4103	tags=26%, list=23%, signal=20%	SMAD4/TBX3/TGFB2/ISL1/DCHS1/MSX1/NOG/ROBO2/ADAMTS5/BMP5	0.232472	0.944516	p3_0.232472324723247	p0_0.944516129032258
GO:0003205	cardiac chamber development	162	-0.469507	-1.70324	0.000121739	0.00553394	0.00489026	2212	tags=30%, list=11%, signal=27%	TP53/NRG1/TGFBR1/PAX8/FOXC1/TPM1/PPP1R13L/SLIT2/PTK7/PDE2A/CHD7/ZFPM1/HEG1/SMO/GATA6/HES1/RYR2/DHRS3/CRELD1/TBX1/CAV3/MYOCD/TGFB2/DSP/DNAH11/MYBPC3/JAG1/MYH6/TNNC1/MYH7/TNNT2/TBX20/MYL3/TNNI3/GATA4/ISL1/MYL2/SLIT3/NPY2R/GATA3/PKP2/HEY1/HAND2/HEYL/HAND1/HEY2/NKX2-5/GJA5	cardiac chamber development	164	-0.244702	-1.0065	0.45805	0.848494	0.790408	2719	tags=20%, list=13%, signal=18%	TBX20/BMPR1A/SLIT3/WNT5A/MYL3/NOG/CITED2/FOXH1/IGF1R/NAGLU/PROX1/MYOCD/FOXC1/SEMA3C/GREB1L/PLXND1/CNTRL/CRELD1/TNNC1/TBX2/SAV1/BMP7/SRF/FKBP1A/MDM4/PDE2A/BMPR2/EGLN1/ISL1/MEF2C/SOX11/NRG1/DSP	cardiac chamber development	139	-0.256664	-0.786495	0.804851	1	1	4103	tags=26%, list=23%, signal=20%	SMAD4/TBX3/TBX5/RBM15/DLL4/HAND2/KCNJ8/FGFR2/RBP4/TGFB2/ISL1/LMO4/ZFPM2/MYOCD/NDST1/TGFBR3/NPY5R/PDE2A/NOG/ROBO2/TBX1/KCNK2/GREB1L/ADAMTS1/PROX1/TNNC1/RYR2/WNT2/WNT5A/FOXF1/SHOX2/MYL3/BMP5/CAV3/SFRP2/TNNT2	0.000121739	0.804851	p3_0.00012173850555445	p0_0.804851157662624
GO:0003206	cardiac chamber morphogenesis	121	-0.488924	-1.7171	0.000607415	0.0193619	0.0171098	2212	tags=35%, list=11%, signal=31%	TP53/NRG1/TGFBR1/FOXC1/TPM1/PPP1R13L/SLIT2/CHD7/ZFPM1/HEG1/SMO/GATA6/HES1/RYR2/DHRS3/TBX1/CAV3/TGFB2/DSP/DNAH11/MYBPC3/JAG1/MYH6/TNNC1/MYH7/TNNT2/TBX20/MYL3/TNNI3/GATA4/ISL1/MYL2/SLIT3/NPY2R/GATA3/PKP2/HEY1/HAND2/HEYL/HAND1/HEY2/NKX2-5	cardiac chamber morphogenesis	123	-0.281699	-1.11458	0.23341	0.722738	0.67326	3244	tags=23%, list=15%, signal=20%	CHD7/MYH7/POU4F1/MED1/TBX20/BMPR1A/SLIT3/WNT5A/MYL3/NOG/CITED2/FOXH1/NAGLU/PROX1/FOXC1/SEMA3C/TNNC1/TBX2/SAV1/BMP7/SRF/FKBP1A/BMPR2/EGLN1/ISL1/MEF2C/SOX11/NRG1/DSP	cardiac chamber morphogenesis	105	-0.298079	-0.897548	0.618079	1	1	1872	tags=28%, list=10%, signal=25%	SMAD4/TBX3/TBX5/RBM15/DLL4/HAND2/FGFR2/RBP4/TGFB2/ISL1/ZFPM2/TGFBR3/NPY5R/NOG/ROBO2/TBX1/ADAMTS1/PROX1/TNNC1/RYR2/WNT2/WNT5A/FOXF1/SHOX2/MYL3/BMP5/CAV3/SFRP2/TNNT2	0.000607415	0.618079	p3_0.000607414883895817	p0_0.618079096045198
GO:0003207	cardiac chamber formation	12	-0.652538	-1.49683	0.0621469	0.325478	0.28762	545	tags=42%, list=3%, signal=41%	BMP2/TBX20/HAND2/HAND1/NKX2-5	cardiac chamber formation	12	0.362339	0.864448	0.641791	0.920766	0.857731	686	tags=17%, list=3%, signal=16%	NOTCH1/BMP2	cardiac chamber formation	9	0.318575	0.737767	0.83908	1	1	818	tags=11%, list=5%, signal=11%	MESP1	0.0621469	0.83908	p3_0.0621468926553672	p0_0.839080459770115
GO:0003208	cardiac ventricle morphogenesis	69	-0.643988	-2.06088	2.62944e-06	0.000199703	0.000176474	2368	tags=46%, list=12%, signal=41%	CPE/NRG1/TGFBR1/FOXC1/TPM1/PPP1R13L/CHD7/HEG1/RYR2/TGFB2/DSP/MYBPC3/JAG1/MYH6/TNNC1/MYH7/TNNT2/TBX20/MYL3/TNNI3/GATA4/ISL1/MYL2/NPY2R/GATA3/PKP2/HEY1/HAND2/HEYL/HAND1/HEY2/NKX2-5	cardiac ventricle morphogenesis	71	-0.30086	-1.06859	0.341981	0.802124	0.747212	3705	tags=29%, list=18%, signal=24%	SMAD4/RBPJ/CHD7/MYH7/POU4F1/MED1/TBX20/BMPR1A/MYL3/NOG/FOXH1/NAGLU/PROX1/FOXC1/SEMA3C/TNNC1/FKBP1A/ISL1/MEF2C/NRG1/DSP	cardiac ventricle morphogenesis	54	-0.334371	-0.92263	0.55198	1	1	4103	tags=33%, list=23%, signal=26%	SMAD4/TBX5/DLL4/HAND2/FGFR2/TGFB2/ISL1/ZFPM2/TGFBR3/NPY5R/NOG/PROX1/TNNC1/RYR2/FOXF1/MYL3/SFRP2/TNNT2	2.62944e-06	0.55198	p3_2.62943530788758e-06	p0_0.551980198019802
GO:0003209	cardiac atrium morphogenesis	26	-0.606927	-1.64224	0.0151306	0.157902	0.139535	1704	tags=38%, list=8%, signal=35%	ZFPM1/HEG1/SMO/TGFB2/MYH6/TBX20/GATA4/ISL1/HEY2/NKX2-5	cardiac atrium morphogenesis	27	0.256073	0.740875	0.854512	0.968248	0.901963	2039	tags=15%, list=10%, signal=13%	NOTCH1/BMP2/MYH6/WNT2	cardiac atrium morphogenesis	23	-0.378874	-0.919564	0.525588	1	1	4068	tags=39%, list=22%, signal=30%	TBX5/DLL4/TGFB2/ISL1/NOG/PROX1/WNT2/WNT5A/SHOX2	0.0151306	0.854512	p3_0.0151305514935683	p1_0.85451197053407
GO:0003214	cardiac left ventricle morphogenesis	16	-0.470454	-1.12985	0.305447	0.64115	0.566574	1179	tags=31%, list=6%, signal=29%	CPE/RYR2/NPY2R/HAND1/HEY2	cardiac left ventricle morphogenesis	16	0.290197	0.741412	0.823864	0.966142	0.900001	304	tags=6%, list=1%, signal=6%	NOTCH1	cardiac left ventricle morphogenesis	14	-0.597713	-1.30415	0.174107	1	1	4103	tags=57%, list=23%, signal=44%	HEY2/NAGLU/SMAD4/TBX5/NPY5R/RYR2/FOXF1/SFRP2	0.174107	0.823864	p0_0.174107142857143	p1_0.823863636363636
GO:0003215	cardiac right ventricle morphogenesis	20	-0.798285	-2.05784	0.000170137	0.00725525	0.00641135	1989	tags=60%, list=10%, signal=54%	PPP1R13L/CHD7/TGFB2/JAG1/TBX20/GATA4/ISL1/GATA3/HAND2/HAND1/HEY2/NKX2-5	cardiac right ventricle morphogenesis	20	0.367827	0.996631	0.436803	0.843237	0.78551	882	tags=14%, list=4%, signal=14%	NOTCH1/MIR17HG/ZFPM2	cardiac right ventricle morphogenesis	14	0.302653	0.798485	0.709091	1	1	1320	tags=14%, list=7%, signal=13%	GATA3/PPP1R13L	0.000170137	0.709091	p3_0.000170137449453357	p0_0.709090909090909
GO:0003222	ventricular trabecula myocardium morphogenesis	14	-0.697431	-1.62995	0.0190278	0.182138	0.160953	2206	tags=50%, list=11%, signal=45%	NRG1/TGFBR1/CHD7/HEG1/TGFB2/HEY2/NKX2-5	ventricular trabecula myocardium morphogenesis	14	-0.424526	-1.07622	0.364583	0.810826	0.755318	3472	tags=43%, list=17%, signal=36%	RBPJ/CHD7/MED1/BMPR1A/FOXH1/NRG1	ventricular trabecula myocardium morphogenesis	12	0.326048	0.832808	0.632184	1	1	358	tags=8%, list=2%, signal=8%	ENG	0.0190278	0.632184	p3_0.0190278016143472	p0_0.632183908045977
GO:0003228	atrial cardiac muscle tissue development	19	-0.484253	-1.22839	0.193487	0.528823	0.467312	1467	tags=26%, list=7%, signal=24%	GATA6/MYH6/HCN4/ISL1/NKX2-5	atrial cardiac muscle tissue development	22	0.271658	0.751107	0.830224	0.966142	0.900001	2039	tags=18%, list=10%, signal=16%	MYH6/GJB6/TREX1/WNT2	atrial cardiac muscle tissue development	15	-0.423248	-0.944575	0.526627	1	1	4070	tags=53%, list=22%, signal=41%	TBX3/TBX5/ISL1/NOG/PROX1/WNT2/SHOX2/BVES	0.193487	0.830224	p3_0.193486590038314	p1_0.830223880597015
GO:0003229	ventricular cardiac muscle tissue development	57	-0.554257	-1.73177	0.002962	0.0616392	0.0544696	2206	tags=40%, list=11%, signal=36%	NRG1/TGFBR1/FOXC1/TPM1/PPP1R13L/CHD7/HEG1/RYR2/TGFB2/DSP/MYBPC3/MYH6/TNNC1/MYH7/TNNT2/MYL3/TNNI3/ISL1/MYL2/PKP2/HAND1/HEY2/NKX2-5	ventricular cardiac muscle tissue development	59	-0.354653	-1.22883	0.146226	0.652309	0.607653	3705	tags=37%, list=18%, signal=31%	SMAD4/RBPJ/CHD7/MYH7/POU4F1/MED1/BMPR1A/HOPX/MYL3/NOG/FOXH1/ID2/NAGLU/PROX1/FOXC1/DSG2/TNNC1/FKBP1A/ISL1/COL14A1/NRG1/DSP	ventricular cardiac muscle tissue development	47	-0.373343	-1.01641	0.410872	1	1	4103	tags=43%, list=23%, signal=33%	SMAD4/TBX3/TBX5/DLL4/KCNJ8/ID2/FGFR2/TGFB2/DSG2/ISL1/ZFPM2/TGFBR3/KCNJ11/NOG/IRX3/PROX1/TNNC1/RYR2/MYL3/TNNT2	0.002962	0.410872	p3_0.00296199788139798	p0_0.410872313527181
GO:0003230	cardiac atrium development	34	-0.611118	-1.74793	0.00617252	0.0991128	0.0875844	1704	tags=32%, list=8%, signal=30%	ZFPM1/HEG1/SMO/TGFB2/MYH6/TBX20/GATA4/ISL1/HEY2/NKX2-5/GJA5	cardiac atrium development	35	0.27401	0.843672	0.698355	0.936321	0.872221	2039	tags=17%, list=10%, signal=16%	NOTCH1/BMP2/MYH6/NPHP3/ANK2/WNT2	cardiac atrium development	30	-0.295276	-0.751312	0.778364	1	1	4068	tags=30%, list=22%, signal=23%	TBX5/DLL4/TGFB2/ISL1/NOG/PROX1/WNT2/WNT5A/SHOX2	0.00617252	0.778364	p3_0.00617252182576695	p0_0.778364116094987
GO:0003231	cardiac ventricle development	122	-0.528165	-1.85217	2.51238e-05	0.00144427	0.00127628	2206	tags=33%, list=11%, signal=29%	NRG1/TGFBR1/PAX8/FOXC1/TPM1/PPP1R13L/SLIT2/PTK7/PDE2A/CHD7/ZFPM1/HEG1/HES1/RYR2/MYOCD/TGFB2/DSP/MYBPC3/JAG1/MYH6/TNNC1/MYH7/TNNT2/TBX20/MYL3/TNNI3/GATA4/ISL1/MYL2/SLIT3/NPY2R/GATA3/PKP2/HEY1/HAND2/HEYL/HAND1/HEY2/NKX2-5/GJA5	cardiac ventricle development	124	-0.275815	-1.09229	0.283753	0.763104	0.710863	3244	tags=25%, list=15%, signal=21%	CHD7/MYH7/POU4F1/MED1/TBX20/BMPR1A/SLIT3/WNT5A/MYL3/NOG/CITED2/FOXH1/NAGLU/PROX1/MYOCD/FOXC1/SEMA3C/GREB1L/CNTRL/TNNC1/SAV1/FKBP1A/MDM4/PDE2A/BMPR2/EGLN1/ISL1/MEF2C/SOX11/NRG1/DSP	cardiac ventricle development	100	-0.235631	-0.705468	0.890661	1	1	4103	tags=27%, list=23%, signal=21%	SMAD4/TBX3/TBX5/RBM15/DLL4/HAND2/FGFR2/TGFB2/ISL1/LMO4/ZFPM2/MYOCD/TGFBR3/NPY5R/PDE2A/NOG/ROBO2/KCNK2/GREB1L/PROX1/TNNC1/RYR2/WNT5A/FOXF1/MYL3/SFRP2/TNNT2	2.51238e-05	0.890661	p3_2.51238288700295e-05	p0_0.890660592255125
GO:0003253	cardiac neural crest cell migration involved in outflow tract morphogenesis	10	-0.571016	-1.23859	0.224449	0.567281	0.501298	199	tags=30%, list=1%, signal=30%	BMP4/HAND2/EDN1	cardiac neural crest cell migration involved in outflow tract morphogenesis	10	-0.541852	-1.24229	0.209302	0.703724	0.655549	5175	tags=70%, list=25%, signal=53%	BMP4/HAND2/FOLR1/PITX2/SEMA3C/BMP7/EDN1	cardiac neural crest cell migration involved in outflow tract morphogenesis	9	-0.31255	-0.63745	0.877676	1	1	5908	tags=67%, list=33%, signal=45%	SEMA3C/EDNRA/CDC42/TWIST1/HAND2/FOLR1	0.209302	0.877676	p1_0.209302325581395	p0_0.877675840978593
GO:0003254	regulation of membrane depolarization	44	-0.306826	-0.905407	0.625475	0.849692	0.75086	3836	tags=36%, list=19%, signal=30%	SMAD7/ALB/ANK3/SCN5A/FZD9/PTPN3/SCN1B/HCN2/HCN1/GJA1/SCN3B/CAV3/KDR/HCN4/IFI6/GJA5	regulation of membrane depolarization	44	-0.316207	-1.04594	0.36129	0.810826	0.755318	5127	tags=27%, list=24%, signal=21%	FZD9/CAMK2D/HCN1/BCL2/CACNA1G/PPP2R3C/SLMAP/BOK/SCN3B/NTSR1/NEDD4L/GCLM	regulation of membrane depolarization	36	-0.430963	-1.12288	0.317829	1	1	4083	tags=36%, list=23%, signal=28%	GJA1/TBX5/ABCD1/GCLM/HCN3/SCN2B/DCN/KDR/SCN3B/SLMAP/BOK/MYOC/CAV3	0.317829	0.625475	p0_0.317829457364341	p3_0.625475285171103
GO:0003263	cardioblast proliferation	11	-0.469646	-1.04675	0.417969	0.728324	0.643609	1200	tags=27%, list=6%, signal=26%	HES1/ISL1/HAND2	cardioblast proliferation	11	0.505412	1.17013	0.266417	0.750801	0.699402	728	tags=18%, list=3%, signal=18%	NOTCH1/SIX1	cardioblast proliferation	10	0.348021	0.837653	0.66092	1	1	83	tags=10%, list=0%, signal=10%	SIX1	0.266417	0.66092	p1_0.266416510318949	p0_0.660919540229885
GO:0003264	regulation of cardioblast proliferation	11	-0.469646	-1.04675	0.417969	0.728324	0.643609	1200	tags=27%, list=6%, signal=26%	HES1/ISL1/HAND2	regulation of cardioblast proliferation	11	0.505412	1.17013	0.266417	0.750801	0.699402	728	tags=18%, list=3%, signal=18%	NOTCH1/SIX1	regulation of cardioblast proliferation	10	0.348021	0.837653	0.66092	1	1	83	tags=10%, list=0%, signal=10%	SIX1	0.266417	0.66092	p1_0.266416510318949	p0_0.660919540229885
GO:0003266	regulation of secondary heart field cardioblast proliferation	10	-0.478385	-1.03767	0.410822	0.723545	0.639386	1200	tags=30%, list=6%, signal=28%	HES1/ISL1/HAND2	regulation of secondary heart field cardioblast proliferation	10	0.508128	1.15843	0.283554	0.763104	0.710863	728	tags=20%, list=3%, signal=19%	NOTCH1/SIX1	regulation of secondary heart field cardioblast proliferation	9	0.453407	1.05002	0.356322	1	1	83	tags=11%, list=0%, signal=11%	SIX1	0.283554	0.410822	p1_0.283553875236295	p3_0.410821643286573
GO:0003272	endocardial cushion formation	28	0.350201	0.982833	0.514831	0.787072	0.695523	2071	tags=29%, list=10%, signal=26%	BMP5/TBX2/ROBO2/TMEM100/TBX3/DCHS1/RBPJ/BMP7	endocardial cushion formation	28	0.313351	0.914592	0.600739	0.912753	0.850267	1567	tags=14%, list=7%, signal=13%	NOTCH1/MSX1/BMP2/TGFBR1	endocardial cushion formation	26	-0.275948	-0.677973	0.854571	1	1	4103	tags=31%, list=23%, signal=24%	SMAD4/TBX3/TGFB2/DCHS1/MSX1/NOG/ROBO2/BMP5	0.514831	0.854571	p3_0.514830508474576	p0_0.854570637119114
GO:0003279	cardiac septum development	105	-0.455376	-1.56121	0.00545607	0.0902372	0.0797413	2212	tags=28%, list=11%, signal=25%	TP53/TGFBR1/PAX8/SLIT2/PTK7/PDE2A/CHD7/ZFPM1/HEG1/SMO/GATA6/HES1/DHRS3/CRELD1/TBX1/TGFB2/DNAH11/JAG1/TBX20/GATA4/ISL1/SLIT3/GATA3/HEY1/HEYL/HAND1/HEY2/NKX2-5/GJA5	cardiac septum development	105	-0.234381	-0.893629	0.696296	0.936099	0.872015	2719	tags=19%, list=13%, signal=17%	TBX20/BMPR1A/SLIT3/WNT5A/NOG/CITED2/PROX1/SEMA3C/PLXND1/CNTRL/CRELD1/TBX2/SAV1/BMP7/MDM4/PDE2A/BMPR2/EGLN1/ISL1/SOX11	cardiac septum development	92	0.235817	0.955252	0.507576	1	1	3663	tags=26%, list=20%, signal=21%	STRA6/ENG/GATA3/PTK7/ADAMTS6/PRDM1/CITED2/PAX8/NSD2/SLIT3/SMAD6/ACVR1/BMP4/HEY1/SMAD7/FZD1/GJA5/PLXND1/ROBO1/MSX2/NPHP3/NRP1/LUZP1/APLNR	0.00545607	0.696296	p3_0.00545607404346275	p1_0.696296296296296
GO:0003281	ventricular septum development	71	-0.421152	-1.35096	0.0485612	0.310008	0.273949	2172	tags=24%, list=11%, signal=21%	TGFBR1/PAX8/SLIT2/PTK7/PDE2A/ZFPM1/HEG1/HES1/TGFB2/GATA4/SLIT3/GATA3/HEY1/HEYL/HEY2/NKX2-5/GJA5	ventricular septum development	71	0.255598	0.907999	0.652249	0.923185	0.859985	3234	tags=21%, list=15%, signal=18%	NOTCH1/STRA6/SUFU/MIR17HG/ZFPM2/SALL4/RBM15/PTK7/TGFBR1/FRS2/NOS3/HEYL/XIRP2/FGFRL1/HES1	ventricular septum development	61	0.282511	1.06621	0.331522	1	1	3055	tags=26%, list=17%, signal=22%	STRA6/GATA3/PTK7/PRDM1/CITED2/PAX8/NSD2/SLIT3/SMAD6/ACVR1/BMP4/HEY1/SMAD7/FZD1/GJA5/ROBO1	0.0485612	0.652249	p3_0.0485611510791367	p1_0.652249134948097
GO:0003283	atrial septum development	21	-0.711282	-1.85563	0.00290113	0.060615	0.0535646	1704	tags=43%, list=8%, signal=39%	ZFPM1/SMO/TGFB2/TBX20/GATA4/ISL1/HEY2/NKX2-5/GJA5	atrial septum development	21	-0.433186	-1.21767	0.200436	0.695529	0.647914	2719	tags=24%, list=13%, signal=21%	TBX20/WNT5A/MDM4/BMPR2/ISL1	atrial septum development	18	-0.218849	-0.510074	0.97067	1	1	5759	tags=39%, list=32%, signal=27%	HEY2/WNT11/ANK2/TBX5/TGFB2/ISL1/WNT5A	0.00290113	0.97067	p3_0.00290113320631598	p0_0.970670391061452
GO:0003298	physiological muscle hypertrophy	22	-0.654586	-1.72196	0.00762905	0.109596	0.0968484	972	tags=27%, list=5%, signal=26%	AKAP6/CAV3/SORBS2/ADRA1A/GATA4/EDN1	physiological muscle hypertrophy	24	-0.410337	-1.18126	0.210643	0.703724	0.655549	2821	tags=28%, list=13%, signal=24%	AKAP6/PPARA/RGS4/ADRA1A/MEIS1/COL14A1/EDN1	physiological muscle hypertrophy	21	-0.489567	-1.16556	0.270423	1	1	735	tags=38%, list=4%, signal=37%	G6PD/MEIS1/PPARA/AKAP6/SORBS2/PI16/CAV3/IGF1	0.00762905	0.270423	p3_0.00762905246427413	p0_0.270422535211268
GO:0003299	muscle hypertrophy in response to stress	25	-0.592819	-1.58949	0.0260374	0.21256	0.187836	1658	tags=40%, list=8%, signal=37%	NPPA/MIR25/GATA6/MIR214/KLF15/MYH6/MLIP/MYH7/TCAP/HEY2	muscle hypertrophy in response to stress	25	0.223699	0.635757	0.95082	0.990488	0.92268	4802	tags=28%, list=23%, signal=22%	MYH6/MLIP/HDAC4/CAMTA2/GATA6/LMNA/INPP5F	muscle hypertrophy in response to stress	18	0.3199	0.88041	0.615385	1	1	4138	tags=28%, list=23%, signal=21%	PPARG/EZH2/FOXO1/SMAD3/TCAP	0.0260374	0.95082	p3_0.0260374093581381	p1_0.950819672131147
GO:0003300	cardiac muscle hypertrophy	82	-0.482252	-1.58532	0.00531432	0.0889943	0.0786429	1969	tags=24%, list=10%, signal=22%	LMCD1/NPPA/MIR25/GATA6/RYR2/MIR214/KLF15/AKAP6/CAV3/MYH6/MLIP/MYH7/SORBS2/ADRA1A/GATA4/TCAP/GATA5/HAND2/EDN1/HEY2	cardiac muscle hypertrophy	84	-0.222114	-0.822642	0.84	0.96626	0.900111	4895	tags=27%, list=23%, signal=21%	SORBS2/PRKCA/CAMK2D/HAND2/TNFRSF1B/PDE9A/ACACB/SMAD4/MYH7/AKAP6/PPARA/RGS4/ATP2A2/ADRA1A/MEF2A/NR4A3/KDM4A/MIR17/MEIS1/PDE5A/HTR2B/COL14A1/EDN1	cardiac muscle hypertrophy	70	-0.238472	-0.681153	0.896181	1	1	6174	tags=39%, list=34%, signal=26%	CAMK2D/HDAC2/BECN1/CAMTA2/HEY2/MTPN/ROCK1/GATA5/ATP2B4/ATP2A2/ROCK2/G6PD/MEIS1/JARID2/SMAD4/HAND2/PPARA/AKAP6/LMCD1/SORBS2/TIAM1/NR4A3/TTN/RYR2/PI16/CAV3/IGF1	0.00531432	0.896181	p3_0.00531431736883847	p0_0.89618138424821
GO:0003301	physiological cardiac muscle hypertrophy	22	-0.654586	-1.72196	0.00762905	0.109596	0.0968484	972	tags=27%, list=5%, signal=26%	AKAP6/CAV3/SORBS2/ADRA1A/GATA4/EDN1	physiological cardiac muscle hypertrophy	24	-0.410337	-1.18126	0.210643	0.703724	0.655549	2821	tags=28%, list=13%, signal=24%	AKAP6/PPARA/RGS4/ADRA1A/MEIS1/COL14A1/EDN1	physiological cardiac muscle hypertrophy	21	-0.489567	-1.16556	0.270423	1	1	735	tags=38%, list=4%, signal=37%	G6PD/MEIS1/PPARA/AKAP6/SORBS2/PI16/CAV3/IGF1	0.00762905	0.270423	p3_0.00762905246427413	p0_0.270422535211268
GO:0003309	type B pancreatic cell differentiation	24	-0.446077	-1.19306	0.22824	0.571011	0.504594	1502	tags=25%, list=7%, signal=23%	SMO/GATA6/ONECUT1/CDH2/BHLHA15/BMP6	type B pancreatic cell differentiation	27	0.34341	0.993559	0.441989	0.843237	0.78551	4977	tags=37%, list=24%, signal=28%	RFX3/PDX1/BHLHA15/DLL1/PAX6/CDK6/GATA6/INSM1/CLOCK/RHEB	type B pancreatic cell differentiation	19	0.366118	1.03507	0.414384	1	1	1365	tags=11%, list=8%, signal=10%	CDH2/BMP6	0.22824	0.441989	p3_0.228239845261122	p1_0.441988950276243
GO:0003323	type B pancreatic cell development	20	-0.389033	-1.00286	0.462572	0.757094	0.669033	1502	tags=20%, list=7%, signal=19%	SMO/CDH2/BHLHA15/BMP6	type B pancreatic cell development	22	0.256305	0.708657	0.880597	0.971758	0.905233	4977	tags=32%, list=24%, signal=24%	RFX3/BHLHA15/DLL1/CDK6/INSM1/CLOCK/RHEB	type B pancreatic cell development	18	0.373506	1.02794	0.423077	1	1	1365	tags=11%, list=8%, signal=10%	CDH2/BMP6	0.423077	0.880597	p0_0.423076923076923	p1_0.880597014925373
[truncated: 5,623 more rows]

## Sheet: PAAF cluster
ID	Description.x	setSize.x	enrichmentScore.x	NES.x	pvalue.x	p.adjust.x	qvalue.x	rank.x	leading_edge.x	core_enrichment.x	Description.y	setSize.y	enrichmentScore.y	NES.y	pvalue.y	p.adjust.y	qvalue.y	rank.y	leading_edge.y	core_enrichment.y	Description	setSize	enrichmentScore	NES	pvalue	p.adjust	qvalue	rank	leading_edge	core_enrichment	p_min	p_max	p_min_orig	p_max_orig
[truncated: 6,170 more rows]
