# Supplementary material for: Adventitial fibroblasts direct smooth muscle cell-state transition in pulmonary vascular disease
Source: bioRxiv preprint, doi:10.1101/2024.05.15.594343, version 4 (2025-02-20)
Supplement: proteomic dataset [file 594343_file04.xlsx]

## Sheet: targets|design
Design
Donor_advFB	Donor_PASMC	IPAH_advFB	IPAH_PASMC
1	0	0	0
1	0	0	0
1	0	0	0
1	0	0	0
0	0	1	0
0	0	1	0
0	0	1	0
0	0	1	0
0	1	0	0
0	1	0	0
0	1	0	0
0	1	0	0
0	0	0	1
0	0	0	1
0	0	0	1
0	0	0	1

## Sheet: contrasts
	IPAH_advFB - Donor_advFB	IPAH_PASMC - Donor_PASMC	Donor_PASMC - Donor_advFB
Donor_advFB	-1	0	-1
Donor_PASMC	0	-1	1
IPAH_advFB	1	0	0
IPAH_PASMC	0	1	0

## Sheet: data
	Annotations		Coefficients (LFC)			Confidence interval (half width)			Significance (-log P)			Anova	Mean
GENE_LABEL	ENTREZ_ID	KEGG_IDS	IPAH_advFB - Donor_advFB	IPAH_PASMC - Donor_PASMC	Donor_PASMC - Donor_advFB	IPAH_advFB - Donor_advFB	IPAH_PASMC - Donor_PASMC	Donor_PASMC - Donor_advFB	IPAH_advFB - Donor_advFB	IPAH_PASMC - Donor_PASMC	Donor_PASMC - Donor_advFB	(-log P)	Expr.
RNF167	26001		0.38	0.23	-0.7	1.04	1.27	1.27	0.39	0.17	0.64	0.66	0.82
EHBP1L1	254102		0.16	-0.04	0.19	1.1	1.1	1.1	0.12	0.03	0.14	0.01	0.34
C16orf62	57020		-0.11	-0.29	0.75	1.01	0.95	0.95	0.09	0.28	0.96	0.66	0.3
DUOX1	53905		-0.03	0.23	0.7	1.07	1.07	1.07	0.02	0.21	0.78	0.79	0.2
NCDN	23154		0.01	-0.03	0.29	0.68	0.68	0.68	0.01	0.03	0.42	0.16	0.2
UBE4A	9354	04120	0.02	0.44	0.12	0.51	0.51	0.51	0.02	1.07	0.21	0.97	0.19
KRT19	3880	04915	0.27	-0.28	1.2	1.03	0.84	1.03	0.24	0.31	1.59	1.02	0.13
ATP2B1	490	04020|04022|04024|04261|04925|04961|04970|04972|04978	0.41	0.59	-0.52	0.65	0.65	0.65	0.7	1.15	0.98	1.28	0.12
NUP133	55746	03013	0.13	-0.24	0.03	0.52	0.52	0.52	0.22	0.47	0.05	0.25	0.09
BAG6	7917		0.11	0.32	0.14	0.4	0.4	0.4	0.25	0.93	0.33	0.85	0.09
DDX46	9879	03040	-0.09	-0.18	0.37	0.29	0.29	0.29	0.28	0.71	1.82	1.73	0.09
COL3A1	1281	04611|04926|04933|04974|05146	-0.16	1.48	-0.56	1	1	1	0.13	2.18	0.59	1.4	-0.54
KPNA1	3836	05164	-0.05	-0.16	0.44	0.46	0.46	0.46	0.09	0.37	1.25	0.95	0.07
PDS5B	23047		-0.26	-0.73	0.15	0.65	0.65	0.65	0.42	1.49	0.21	0.91	0.07
GATAD2A	54815		0.15	0.27	0.25	0.28	0.28	0.28	0.59	1.22	1.11	2.01	0.06
DIDO1	11083		0.01	0.04	0.05	0.56	0.56	0.56	0.02	0.05	0.07	0.01	0.06
FAU	2197	03010	0.19	0.05	0.07	0.38	0.38	0.38	0.53	0.1	0.16	0.13	0.06
NR3C1	2908	04080	-0.53	0.26	0.01	0.7	0.7	0.7	0.89	0.35	0.01	0.83	0.06
LAGE3	8270		0.28	0.53	-0.14	0.8	0.8	0.8	0.37	0.8	0.16	0.38	0.06
CPD	1362		-0.32	0.1	-0.08	0.53	0.53	0.53	0.71	0.18	0.13	0.34	0.05
MGLL	11343	00561|01100|04714|04723|04923	0.01	-0.13	0.13	0.35	0.35	0.35	0.02	0.35	0.37	0.09	0.05
DPP7	29952		0.26	0.43	0.02	0.58	0.58	0.58	0.45	0.86	0.03	0.47	0.05
NHP2	55651	03008	0.11	0.46	-0.52	0.67	0.67	0.67	0.13	0.79	0.94	0.63	0.05
SHANK1	50944	04724	0.23	0.18	0.14	0.39	0.39	0.39	0.67	0.48	0.35	0.45	0.04
ARHGEF17	9828		0.12	-0.52	0.46	0.59	0.59	0.59	0.18	1.11	0.94	0.56	0.04
BOD1L1	259282		-0.28	0.12	0.13	0.59	0.59	0.59	0.49	0.17	0.19	0.53	0.04
TBC1D5	9779		0.01	-0.08	0.53	0.6	0.74	0.74	0.01	0.08	0.83	0.51	0.04
NOL6	65083	03008	0.05	-0.21	0.35	0.32	0.32	0.32	0.13	0.75	1.51	0.89	0.03
ACOT2			-0.41	-0.05	0.19	0.54	0.54	0.54	0.92	0.08	0.37	0.93	0.03
DERL2	51009	04141	0.21	0.12	0.51	0.55	0.55	0.55	0.37	0.19	1.17	0.99	0.03
YLPM1	56252		-0.2	0.2	0.43	0.57	0.57	0.57	0.37	0.35	0.91	1.42	0.03
KCMF1	56888		0.07	-0.27	0.44	0.48	0.48	0.48	0.13	0.6	1.16	0.58	0.03
ZC3H11A	9877		-0.05	-0.52	0.14	1.19	1.19	1.19	0.03	0.47	0.1	0.11	0.03
MRPL37	51253		0.25	-0.02	0.16	0.38	0.38	0.38	0.75	0.04	0.44	0.24	0.03
FOSL1	8061	04310|04380|04657|05166	0.41	0.01	0.56	0.57	0.57	0.57	0.84	0.01	1.25	0.78	0.02
TMTC3	160418		0.05	0.05	0.15	0.46	0.46	0.46	0.09	0.08	0.31	0.11	0.02
CBR3	874	00590|00980|01100	0.58	0.17	1.09	0.63	0.63	0.63	1.2	0.26	2.35	2.1	0.01
ASPSCR1	79058	05202	0.18	0.37	0.06	1.04	1.12	1.12	0.14	0.31	0.04	0.07	0.01
EPHA2	1969	04010|04014|04015|04151|04360	-0.21	-0.2	0.86	0.43	0.43	0.43	0.55	0.5	2.67	2.79	0.01
MTOR	2475	01521|01522|04012|04066|04072|04136|04140|04150|04151|04152|04211|04213|04218|04371|04630|04659|04714|04910|04919|04920|04930|04931|05163|05165|05167|05170|05200|05205|05206|05210|05212|05214|05215|05221|05224|05225|05226|05230|05231	-0.22	-0.16	0.68	0.53	0.53	0.53	0.45	0.29	1.71	1.82	0
TBC1D10B	26000		0.35	0.58	-0.04	0.72	0.72	0.72	0.49	0.95	0.04	0.52	0
MYLK	4638	04020|04022|04270|04371|04510|04611|04810|04921|04971	0.11	0.44	-0.36	0.92	0.92	0.92	0.09	0.5	0.39	0.17	0
H2AFX	3014	04217|05034|05322	0.18	-0.1	0.48	0.35	0.35	0.35	0.53	0.25	1.96	1.32	0
FAHD1	81889	00350|01100	-0.15	-0.04	-0.04	0.31	0.31	0.31	0.51	0.09	0.1	0.12	-0.01
DDX50	79009		0.35	0.08	0.26	0.93	0.93	0.93	0.36	0.07	0.25	0.07	-0.01
SLC25A11	8402		-0.34	-0.4	0.4	0.61	0.61	0.61	0.59	0.72	0.74	0.89	-0.01
NDUFS8	4728	00190|01100|04714|04723|04932|05010|05012|05016	-0.07	0.1	0.02	0.47	0.47	0.47	0.12	0.18	0.03	0.06	-0.01
MYO5A	4644		-0.31	0.26	-0.08	0.51	0.51	0.51	0.66	0.53	0.12	0.57	-0.01
RAP1GDS1	5910		0.1	-0.06	0.09	0.25	0.25	0.25	0.37	0.22	0.36	0.09	-0.01
IMPAD1	54928	00562|00920|01100|04070	-0.05	-0.17	0.48	0.34	0.34	0.34	0.12	0.53	2.07	1.89	-0.02
GRWD1	83743		-0.06	-0.25	-0.02	0.3	0.3	0.3	0.16	1.07	0.06	0.69	-0.02
BYSL	705		0.14	-0.74	0.16	0.9	0.9	0.9	0.13	0.99	0.15	0.52	-0.02
SLC25A13	10165		-0.48	-0.59	0.13	0.77	0.77	0.77	0.69	0.92	0.14	0.6	-0.03
TTC3	7267		-0.25	-0.09	0.27	0.54	0.54	0.54	0.47	0.14	0.52	0.65	-0.03
ZC3HAV1	56829		0.24	0.26	0.13	0.3	0.3	0.3	0.97	1.11	0.45	1.16	-0.03
ADPRHL2	54936		0.33	0.09	0.34	0.48	0.48	0.48	0.77	0.16	0.8	0.54	-0.03
WDR43	23160	03008	-0.03	0.37	-0.4	0.56	0.56	0.56	0.04	0.74	0.81	0.39	-0.03
SRP14	6727	03060	-0.17	-0.13	0.12	0.25	0.25	0.25	0.76	0.55	0.48	0.8	-0.03
EGFR	1956	01521|01522|04010|04012|04014|04015|04020|04066|04068|04072|04144|04151|04510|04520|04540|04630|04810|04912|04915|04921|04926|04928|04934|05120|05160|05163|05165|05200|05205|05206|05210|05212|05213|05214|05215|05218|05219|05223|05224|05225|05226|05230|05231	0.18	0.08	-0.21	0.51	0.51	0.51	0.32	0.12	0.41	0.38	-0.03
PPP1R12C	54776	04270|04510|04810|04921|05205	-0.02	0.57	-0.49	0.78	0.84	0.84	0.02	0.77	0.64	0.32	-0.03
ZPR1	8882		0.05	-0.17	0.16	0.35	0.35	0.35	0.11	0.51	0.47	0.15	-0.03
GOLGA1	2800		-0.36	-0.14	-0.11	0.74	0.74	0.74	0.54	0.17	0.13	0.16	-0.03
ECM1	1893		-0.09	1.31	0.01	0.64	0.64	0.64	0.11	3.26	0.01	3.16	-0.3
CYP51A1	1595	00100|01100	0.26	-0.29	-0.31	0.76	0.76	0.76	0.32	0.37	0.4	0.88	-0.04
HPRT1	3251	00230|00983|01100	0.02	-0.14	0.16	0.21	0.21	0.21	0.06	0.76	0.94	0.46	-0.04
UBXN4	23190		0.03	0.35	0.01	0.47	0.47	0.47	0.05	0.87	0.02	0.48	-0.04
LPCAT1	79888	00564|00565|01100	-0.06	-0.38	0.4	0.35	0.35	0.35	0.13	1.42	1.52	1.24	-0.04
HACD3	51495	00062|01040|01100|01212	-0.1	-0.18	0.14	0.41	0.41	0.41	0.21	0.42	0.31	0.18	-0.04
YARS2	51067	00970	-0.1	0.01	-0.06	0.47	0.47	0.47	0.2	0.02	0.11	0.01	-0.04
DDX24	57062		-0.34	1.2	-1.06	1	1.07	1.07	0.32	1.5	1.28	0.91	-0.05
PUF60	22827	03040	0.04	0	0.13	0.17	0.17	0.17	0.2	0.02	0.93	0.57	-0.04
EBNA1BP2	10969		0.07	0.04	-0.04	0.33	0.33	0.33	0.18	0.1	0.11	0.04	-0.04
SRPRB	58477	03060	0.15	0.2	-0.06	0.26	0.26	0.26	0.63	0.92	0.2	0.58	-0.05
CCDC124	115098		0.14	0.25	0.15	0.65	0.65	0.65	0.2	0.4	0.23	0.25	-0.05
HM13	81502		0.04	0.16	-0.01	0.33	0.33	0.33	0.09	0.49	0.02	0.13	-0.05
TXLNA	200081		0.29	0.08	0.13	0.34	0.34	0.34	1.04	0.21	0.39	0.47	-0.05
PITPNB	23760		0.07	0.05	0.23	0.3	0.3	0.3	0.21	0.15	0.93	0.73	-0.05
CCDC94	55702		0.41	0.31	-0.01	0.49	0.49	0.49	1.02	0.71	0.01	0.68	-0.05
ATP5I	521	00190|01100|04714	-0.18	0	0.2	0.41	0.41	0.41	0.47	0.01	0.52	0.73	-0.05
CBX3	11335		0.22	-0.19	0.36	0.32	0.32	0.32	0.76	0.65	1.5	0.77	-0.05
IRF2BP2	359948		0.32	0.28	0.23	0.84	0.84	0.84	0.37	0.31	0.25	0.2	-0.05
CLIP1	6249	04150	-0.06	0.13	0.33	0.19	0.19	0.19	0.26	0.77	2.68	4.19	-0.05
TCERG1	10915	03040	0.38	1.09	-0.52	0.68	0.68	0.68	0.59	2.4	0.9	1.72	-0.26
RPS18	6222	03010	0.28	0.08	0.04	0.3	0.3	0.3	1.17	0.24	0.09	0.61	-0.06
SEC16A	9919		0.1	-0.12	0.15	0.34	0.34	0.34	0.27	0.34	0.42	0.11	-0.06
NEDD8	4738		-0.09	0.11	0.22	0.21	0.21	0.21	0.41	0.55	1.36	2.57	-0.06
HP1BP3	50809		-0.01	0.06	0.28	0.25	0.25	0.25	0.04	0.19	1.52	1.84	-0.06
PABPN1	8106	03015|05164	-0.18	-0.15	0.35	0.29	0.29	0.29	0.7	0.55	1.67	2.11	-0.06
SEC61B	10952	03060|04141|04145|05110	0.18	0.48	-0.08	0.61	0.61	0.61	0.27	0.95	0.1	0.43	-0.06
SGTA	6449		0.15	-0.01	0.13	0.34	0.34	0.34	0.46	0.02	0.38	0.11	-0.06
RTCA	8634		-0.06	-0.32	0.28	0.43	0.43	0.43	0.11	0.89	0.75	0.5	-0.06
SMARCB1	6598	04714|05225	0.18	0.12	0.28	0.4	0.4	0.4	0.44	0.27	0.81	0.65	-0.06
DRG2	1819		-0.11	-0.26	0.03	0.26	0.26	0.26	0.43	1.24	0.09	0.71	-0.06
MBNL1	4154		0.25	0.19	0.54	0.71	0.71	0.71	0.33	0.24	0.9	0.75	-0.06
NSDHL	50814	00100|01100	-0.14	-0.37	0.04	0.35	0.35	0.35	0.39	1.4	0.1	0.83	-0.06
DNPH1	10591		-0.16	0.01	0.05	0.27	0.27	0.27	0.66	0.03	0.17	0.55	-0.06
PGP	283871	00630|01100|01200	0.04	-0.25	0.53	0.37	0.37	0.37	0.09	0.81	1.92	1.4	-0.06
CEP250	11190		-0.02	0.04	0.07	0.33	0.33	0.33	0.04	0.1	0.18	0.09	-0.07
GMFB	2764		-0.22	-0.07	0.11	0.28	0.28	0.28	0.91	0.21	0.4	0.94	-0.07
TOR1AIP1	26092		-0.01	0.26	0.08	0.37	0.37	0.37	0.02	0.82	0.19	0.72	-0.07
SRSF9	8683	03040|05168	0.25	0.29	0.08	0.3	0.3	0.3	1.03	1.24	0.22	1.12	-0.07
hCG_2043426			0.07	0.02	0.12	0.23	0.23	0.23	0.28	0.08	0.57	0.26	-0.07
COPS5	10987		0.09	0.28	-0.17	0.55	0.55	0.55	0.14	0.52	0.28	0.16	-0.07
ADRM1	11047	03050|05169	0.08	-0.09	0.19	0.31	0.31	0.31	0.21	0.26	0.68	0.2	-0.07
SH2D4A	63898		0.13	0.37	-0.01	0.43	0.43	0.43	0.27	1.06	0.01	0.58	-0.07
MRPS27	23107		0.47	0.04	-0.18	0.55	0.55	0.55	1.05	0.06	0.3	1.06	-0.07
GCLM	2730	00270|00480|01100|04216	0.15	0.07	0.24	0.24	0.24	0.24	0.68	0.24	1.3	1.1	-0.07
PGM1	5236	00010|00030|00052|00230|00500|00520|01100	0.05	0.15	-0.04	0.3	0.3	0.3	0.14	0.5	0.1	0.12	-0.07
ERC1	23085	04064	-0.02	-0.35	0.42	0.45	0.45	0.45	0.03	0.96	1.19	0.78	-0.07
PTPN1	5770	04520|04910|04931	-0.24	-0.31	-0.07	0.31	0.31	0.31	0.96	1.31	0.18	1.12	-0.07
AAMDC	28971		-0.12	1.06	0.18	0.59	0.59	0.59	0.18	2.76	0.28	3.14	-0.5
PBDC1	51260		0.07	0.11	0.13	0.32	0.32	0.32	0.19	0.33	0.39	0.33	-0.07
C12orf57	113246		-0.15	-0.25	0.83	0.31	0.31	0.31	0.49	0.94	4.33	4.79	-0.07
MRPS5	64969	03010	0.14	0.1	-0.27	0.37	0.37	0.37	0.37	0.24	0.85	0.89	-0.08
OXCT1	5019	00072|00280|00650	0.06	0.14	-0.08	0.21	0.21	0.21	0.25	0.75	0.34	0.32	-0.08
OCIAD1	54940		-0.13	0.03	0.12	0.36	0.36	0.36	0.36	0.06	0.33	0.47	-0.08
SKIV2L2	23517	03018	0.1	-0.23	0.25	0.25	0.25	0.25	0.38	1.11	1.25	0.7	-0.08
KIF1BP			0.16	-0.2	0.47	0.39	0.39	0.39	0.42	0.54	1.69	0.95	-0.08
AKAP13	11214	04928|05163	0.14	0.06	0.33	0.29	0.29	0.29	0.5	0.18	1.59	1.42	-0.08
CKAP5	9793		0.1	0.05	0.24	0.22	0.22	0.22	0.45	0.21	1.45	1.31	-0.08
WDR12	55759		0	-0.26	0.08	0.43	0.43	0.43	0	0.65	0.17	0.19	-0.08
GNAI3	2773	04015|04022|04024|04062|04071|04261|04360|04371|04540|04611|04670|04713|04723|04724|04725|04726|04727|04728|04730|04914|04915|04916|04921|04923|04924|04926|04928|04934|04971|05012|05030|05032|05034|05133|05142|05145|05163|05170|05200	-0.03	0.12	0.21	0.35	0.35	0.35	0.07	0.33	0.65	0.88	-0.08
PDXDC1	23042		-0.21	-0.14	0.41	0.26	0.26	0.26	0.94	0.57	2.36	3.15	-0.08
GIT2	9815	04144	-0.03	0.16	0.16	0.45	0.45	0.45	0.05	0.34	0.33	0.46	-0.08
CCAR1	55749		0.24	0.47	0.61	0.9	0.9	0.9	0.24	0.55	0.77	1	-0.08
MCCC2	64087	00280|01100	-0.1	-0.53	0.13	1.12	1.12	1.12	0.07	0.52	0.1	0.14	-0.08
RPL32	6161	03010	0	-0.2	0.25	0.21	0.21	0.21	0	1.19	1.64	1.15	-0.08
SPCS3	60559	03060	0.23	0.17	0.02	0.39	0.39	0.39	0.65	0.44	0.04	0.31	-0.08
TMX2	51075		0.12	-0.19	-0.68	0.39	0.39	0.39	0.27	0.5	2.71	3.99	-0.08
AP1B1	162	04142|05170	-0.18	0.04	0.12	0.2	0.2	0.2	1.17	0.19	0.69	2.08	-0.08
RBPMS	11030		0.03	0.29	0.48	0.44	0.44	0.44	0.05	0.75	1.45	2.29	-0.08
KIAA1429	25962		0.38	-0.4	0.62	0.48	0.48	0.48	0.95	1.02	1.84	1.08	-0.08
PRKRA	8575		0.04	0.11	0.14	0.21	0.21	0.21	0.14	0.54	0.72	0.99	-0.08
SLC3A2	6520	04150|04216|04974	0.15	-0.18	0.59	0.26	0.26	0.26	0.64	0.8	3.62	2.94	-0.08
SFXN1	94081		0.06	0.1	0.11	0.21	0.21	0.21	0.24	0.46	0.52	0.59	-0.08
PSMD6	9861	03050|05169	0.06	-0.07	0.09	0.19	0.19	0.19	0.31	0.34	0.48	0.12	-0.08
COL1A2	1278	04151|04510|04512|04611|04926|04933|04974|05146|05165	-0.06	1.02	0.02	0.66	0.66	0.66	0.07	2.29	0.03	2.1	-0.37
HMGCL	3155	00072|00280|00650|01100|04146	0.17	1	-0.62	0.79	0.79	0.79	0.19	1.77	0.93	1.07	-0.44
PFKL	5211	00010|00030|00051|00052|01100|01200|01230|03018|04066|04152|04922|05230	0.27	0.14	0.45	0.37	0.37	0.37	0.83	0.36	1.67	1.63	-0.09
S100A6	6277		-0.21	0.31	-0.18	0.41	0.41	0.41	0.54	0.9	0.44	0.55	-0.09
TGFB1I1	7041		-0.2	-0.09	0.8	0.52	0.52	0.52	0.37	0.15	2.32	2.83	-0.09
SCYL1	57410		0.02	-0.24	0.48	0.28	0.28	0.28	0.05	1.08	2.67	2.18	-0.09
IPO9	55705		-0.09	-0.12	0.11	0.25	0.25	0.25	0.34	0.51	0.45	0.38	-0.09
SRP68	6730	03060	-0.02	0.02	0.35	0.36	0.36	0.36	0.04	0.05	1.21	1.22	-0.09
PON2	5445		-0.09	-0.08	0.28	0.41	0.41	0.41	0.19	0.18	0.79	0.65	-0.09
UTRN	7402		0.05	-0.11	0.01	0.45	0.45	0.45	0.09	0.22	0.02	0.04	-0.09
NAT10	55226	03008	0.32	0.12	-0.16	0.38	0.38	0.38	1.05	0.3	0.41	1.06	-0.09
SEC24C	9632	04141	0	0.08	0.2	0.21	0.21	0.21	0	0.38	1.2	1.6	-0.09
RPL34	6164	03010	0.09	-0.05	0.27	0.5	0.5	0.5	0.14	0.07	0.57	0.19	-0.09
KHSRP	8570		0.15	0.15	0.08	0.19	0.19	0.19	0.91	0.92	0.39	0.92	-0.09
CYCS	54205	01524|04115|04210|04215|04932|05010|05012|05014|05016|05134|05145|05152|05161|05163|05164|05167|05168|05170|05200|05210|05222|05416	-0.01	-0.01	-0.39	0.37	0.37	0.37	0.01	0.03	1.41	1.37	-0.09
FTSJ3	117246		-0.06	-0.24	0.03	0.26	0.26	0.26	0.2	1.13	0.1	0.57	-0.09
MAP4K4	9448	04010	-0.06	0.08	0.16	0.26	0.26	0.26	0.21	0.27	0.72	1.1	-0.09
TOM1	10043		-0.24	-0.23	0.32	0.38	0.38	0.38	0.68	0.65	1	1.28	-0.09
DDX42	11325	03040	0.04	0.1	0.06	0.5	0.5	0.5	0.07	0.19	0.11	0.05	-0.09
CIAPIN1	57019		-0.08	-0.14	0.38	0.26	0.26	0.26	0.29	0.59	2.16	2.2	-0.09
BROX	148362		0.16	0.19	0.14	0.64	0.64	0.64	0.23	0.28	0.19	0.13	-0.09
CTHRC1	115908		-0.19	0.95	-0.05	0.52	0.52	0.52	0.34	2.82	0.08	2.73	-0.17
MTX1	4580		0.17	0.23	0.02	0.52	0.52	0.52	0.31	0.43	0.02	0.15	-0.09
TCP1	6950		0.03	-0.16	0.13	0.17	0.17	0.17	0.15	1.19	0.93	0.6	-0.09
SNRPF	6636	03040	0.37	0.5	-0.62	0.72	0.72	0.72	0.54	0.79	1.07	1.19	-0.09
HLA-A			0.1	0.86	0.25	0.48	0.48	0.48	0.18	2.75	0.55	3.15	-0.29
RPL24	6152	03010	-0.01	-0.19	0.41	0.21	0.21	0.21	0.03	1.12	3.05	2.72	-0.09
RPS12	6206	03010	0.09	0.18	0.01	0.24	0.24	0.24	0.35	0.9	0.03	0.48	-0.09
LARP1	23367		-0.05	-0.15	0.16	0.31	0.31	0.31	0.12	0.49	0.52	0.26	-0.09
HMGN1	3150	05168	0	0.85	-0.08	0.76	0.76	0.76	0	1.51	0.08	1.01	-0.23
LNP			-0.32	0.13	0.36	0.52	0.52	0.52	0.68	0.21	0.79	1.71	-0.09
EIF5B	9669	03013	0.07	0.13	-0.07	0.23	0.23	0.23	0.31	0.65	0.3	0.29	-0.09
RPL12	6136	03010	0.09	-0.17	0.14	0.26	0.26	0.26	0.33	0.73	0.57	0.3	-0.09
SRI	6717		-0.09	0.02	0.1	0.25	0.25	0.25	0.34	0.08	0.4	0.56	-0.1
NCL	4691	05130	0.24	0.06	0.01	0.23	0.23	0.23	1.32	0.22	0.02	0.81	-0.1
AK2	204	00230|00730|01100	-0.03	0.16	-0.08	0.23	0.23	0.23	0.09	0.81	0.33	0.28	-0.1
RPS27L	51065	03010	0.07	-0.1	0.33	0.21	0.21	0.21	0.32	0.46	2.33	1.73	-0.1
NUFIP2	57532		0.23	-0.01	0.08	0.42	0.42	0.42	0.58	0.01	0.16	0.15	-0.1
ARHGEF2	9181	04530|05130|05418	-0.25	0.26	0.22	0.46	0.46	0.46	0.58	0.6	0.49	1.6	-0.1
RPL36	25873	03010	-0.09	-0.05	0.05	0.27	0.27	0.27	0.32	0.15	0.16	0.14	-0.1
BASP1	10409		0.19	0.75	-0.18	0.51	0.51	0.51	0.37	2.16	0.34	1.41	-0.19
CNP	1267		0.25	0.08	0.24	0.36	0.36	0.36	0.8	0.21	0.77	0.56	-0.1
APMAP	57136		-0.04	0.07	0.19	0.22	0.22	0.22	0.18	0.29	1.09	1.6	-0.1
PFDN4	5203		-0.11	0.09	0.1	0.21	0.21	0.21	0.57	0.41	0.5	1.38	-0.1
DYNC1I2	1781	04145|04962|05132	-0.16	0.09	0.28	0.21	0.21	0.21	0.91	0.43	1.91	3.63	-0.1
P3H3	10536		-0.03	0.1	0.31	0.25	0.25	0.25	0.09	0.42	1.78	2.55	-0.1
SMARCE1	6605	04714|05225	-0.03	-0.01	0.22	0.29	0.29	0.29	0.09	0.03	0.88	0.75	-0.1
TRIP6	7205	04621	0.35	0.73	0.02	0.6	0.6	0.6	0.64	1.7	0.03	1.25	-0.16
CSNK2A2	1459	03008|04064|04137|04310|04520|05162|05168|05169	0.15	-0.12	0.63	0.44	0.44	0.44	0.33	0.24	2.1	1.6	-0.1
TAF15	8148	03022|05202	0.2	0.13	0.17	0.34	0.34	0.34	0.66	0.36	0.53	0.48	-0.1
RCN3	57333		-0.07	0.69	-0.02	0.45	0.45	0.45	0.12	2.28	0.03	2.03	-0.21
BMS1	9790	03008	0.05	-0.15	0.12	0.28	0.28	0.28	0.15	0.56	0.43	0.16	-0.1
YBX3	8531	04530	0.24	0.29	-0.01	0.35	0.35	0.35	0.8	1.02	0.03	0.72	-0.1
RAVER1	125950		0.32	-0.09	0.23	0.46	0.46	0.46	0.81	0.16	0.52	0.29	-0.1
ELOVL1	64834	00062|01100	0.28	0.56	-0.03	0.59	0.59	0.59	0.49	1.22	0.03	0.74	-0.1
TAPBP	6892	04612|05163|05170	0.08	0.65	0.02	0.53	0.53	0.53	0.13	1.7	0.03	1.3	-0.21
DHX29	54505		-0.04	-0.29	0.23	0.69	0.69	0.69	0.04	0.42	0.31	0.1	-0.1
DNAJC9	23234		0.23	-0.25	0.25	0.31	0.31	0.31	0.85	0.95	0.98	0.71	-0.1
MT1E	4493	04978	0.83	-0.55	-0.79	0.71	0.71	0.71	1.61	0.92	1.51	4.24	-0.5
UBQLN2	29978	04141	0.12	0.7	-0.31	0.97	0.97	0.97	0.11	0.88	0.33	0.35	-0.1
SACM1L	22908	00562|01100|04070	0.18	-0.09	0.34	0.34	0.34	0.34	0.55	0.22	1.29	0.65	-0.1
ACIN1	22985	03013|03015|03040	0.13	0.07	0.1	0.23	0.23	0.23	0.62	0.26	0.42	0.32	-0.1
DDX39B	7919	03013|03015|03040|05164	0.03	-0.04	0.17	0.16	0.16	0.16	0.16	0.2	1.36	0.88	-0.1
COPS8	10920		-0.14	-0.06	0.19	0.24	0.24	0.24	0.64	0.23	0.91	1.29	-0.1
EIF2A	83939		-0.03	-0.17	0.29	0.3	0.3	0.3	0.08	0.59	1.24	0.86	-0.1
IGFBP7	3490		0.06	0.64	0.55	0.44	0.44	0.44	0.12	2.11	1.75	3.91	-0.29
TOMM40	10452	05014	0.14	-0.19	0.16	0.26	0.26	0.26	0.57	0.87	0.7	0.49	-0.11
DNAJC10	54431	04141	-0.36	-0.17	0.4	0.33	0.33	0.33	1.49	0.55	1.66	2.93	-0.11
HDGFRP2	84717		-0.09	0.63	-0.28	0.3	0.3	0.3	0.28	3.32	1.16	2.43	-0.15
PPIC	5480		-0.22	0.25	0.09	0.38	0.38	0.38	0.63	0.75	0.2	1.33	-0.11
GM2A	2760	04142	-0.34	0	-0.19	0.71	0.71	0.71	0.48	0	0.24	0.1	-0.11
PUDP			-0.23	-0.19	-0.14	0.67	0.67	0.67	0.33	0.25	0.18	0.12	-0.11
NCAPH	23397		0.71	-0.55	0.42	0.6	0.6	0.6	1.64	1.17	0.8	1.49	-0.22
CIRBP	1153		0.03	0.08	0.31	0.29	0.29	0.29	0.08	0.23	1.42	1.57	-0.11
PCBP2	5094	04216	0.11	-0.24	0.26	0.27	0.27	0.27	0.42	1.1	1.28	0.72	-0.11
FBN1	2200		0.05	0.35	-0.17	0.36	0.36	0.36	0.11	1.27	0.48	0.59	-0.11
HSP90AB1	3326	04141|04151|04217|04612|04621|04657|04659|04914|04915|05200|05215|05418	0.15	-0.13	0.27	0.22	0.22	0.22	0.78	0.66	1.66	0.89	-0.11
HNRNPA0	10949		0.29	-0.13	0.45	0.27	0.27	0.27	1.39	0.49	2.47	1.64	-0.11
EIF2AK2	5610	04141|04217|05160|05162|05164|05165|05167|05168|05169|05203	-0.02	0.16	0.03	0.33	0.33	0.33	0.05	0.53	0.07	0.31	-0.11
CRK	1398	04010|04012|04015|04062|04510|04666|04722|04810|04910|05100|05131|05163|05170|05200|05206|05211|05220	-0.21	-0.12	0.17	0.38	0.38	0.38	0.63	0.33	0.49	0.68	-0.11
PARP4	143	03410|04210|04217	-0.26	-0.1	0.09	0.32	0.32	0.32	0.98	0.29	0.26	0.81	-0.11
NUDC	10726		0.17	0.14	0.06	0.35	0.35	0.35	0.49	0.4	0.15	0.23	-0.11
TSPO	706	04080|04979|05166	-0.25	-0.15	0.29	0.64	0.64	0.64	0.38	0.21	0.45	0.45	-0.11
SNRNP40	9410	03040	0.22	0.23	0.2	0.27	0.27	0.27	0.97	1.04	0.88	1.5	-0.11
LMCD1	29995		0.64	0.24	-0.43	0.43	0.43	0.43	2.22	0.61	1.3	3.23	-0.13
DOCK7	85440		-0.2	0.26	-0.02	0.34	0.34	0.34	0.65	0.89	0.04	1.04	-0.11
EIF2S3			0.07	0.21	-0.02	0.27	0.27	0.27	0.24	0.96	0.06	0.45	-0.11
VDAC2	7417	04020|04022|04216|04217|04218|04621|04979|05012|05016|05166	0.09	-0.03	0.08	0.28	0.28	0.28	0.3	0.09	0.27	0.05	-0.11
AHCY	191	00270|01100	0.08	-0.04	0.12	0.24	0.24	0.24	0.29	0.15	0.52	0.12	-0.11
PABPC1	26986	03013|03015|03018	0.17	-0.01	0.16	0.19	0.19	0.19	1.05	0.02	0.98	0.6	-0.11
MESDC2	23184		0.1	0.62	-0.1	0.32	0.32	0.32	0.28	3.03	0.29	2.32	-0.17
USP14	9097		-0.1	-0.02	0.08	0.19	0.19	0.19	0.54	0.09	0.4	0.61	-0.11
SEC24B	10427	04141	-0.09	-0.2	0.26	0.27	0.27	0.27	0.34	0.87	1.29	1.18	-0.11
SRSF1	6426	03040|04657|05168	0.03	0.17	0.07	0.23	0.23	0.23	0.11	0.89	0.27	0.81	-0.11
ADD1	118		0.02	0.61	-0.19	0.38	0.38	0.38	0.03	2.44	0.51	1.62	-0.2
RHOC	389		-0.07	-0.11	0.27	0.27	0.27	0.27	0.22	0.4	1.28	1.14	-0.11
MRPL24	79590	03010	0.37	0.01	0.51	0.61	0.61	0.61	0.71	0.02	1.06	0.63	-0.11
ABCF1	23		0.09	-0.09	0.3	0.19	0.19	0.19	0.49	0.48	2.47	1.79	-0.11
ARFGAP3	26286	04144	0.03	-0.48	0.56	0.48	0.48	0.48	0.05	1.29	1.61	1.1	-0.11
CNN2			0.12	0.58	0.05	0.39	0.39	0.39	0.29	2.23	0.12	1.94	-0.23
FAM120A	23196		0.18	0.55	-0.08	0.43	0.43	0.43	0.4	1.8	0.15	1.16	-0.19
LEMD2	221496		-0.09	0.04	0.51	0.36	0.36	0.36	0.23	0.09	2.07	2.66	-0.11
TRA2A	29896	03040	0.33	0.02	0.5	0.39	0.39	0.39	1.06	0.04	1.85	1.4	-0.11
RIC8A	60626		0.04	0.11	0.24	0.29	0.29	0.29	0.11	0.38	1.04	1.25	-0.11
EIF3A	8661	03013	0.11	-0.1	0.14	0.2	0.2	0.2	0.58	0.53	0.85	0.36	-0.11
PSME2	5721	03050|04612	-0.15	-0.14	0.23	0.31	0.31	0.31	0.49	0.48	0.89	0.98	-0.11
RMDN3	55177		-0.33	-0.61	-0.2	0.65	0.7	0.7	0.54	1.08	0.25	0.88	-0.11
PSMB4	5692	03050	-0.22	-0.12	0.22	0.2	0.2	0.2	1.47	0.61	1.43	2.63	-0.11
NDUFA8	4702	00190|01100|04714|04723|04932|05010|05012|05016	0.22	0.25	0.12	0.56	0.56	0.56	0.37	0.45	0.18	0.25	-0.11
CS	1431	00020|00630|01100|01200|01210|01230	0.09	0	0.14	0.2	0.2	0.2	0.46	0	0.82	0.38	-0.11
MRPS9	64965	03010	0.03	-0.23	0.13	0.3	0.3	0.3	0.09	0.92	0.45	0.34	-0.11
SEC24D	9871	04141	-0.15	-0.09	0.4	0.23	0.23	0.23	0.77	0.37	2.77	3.59	-0.11
ADSL	158	00230|00250|01100	0.1	-0.09	0.21	0.26	0.26	0.26	0.35	0.33	0.95	0.36	-0.11
RPL37A	6168	03010	0.05	0.01	0.09	0.26	0.26	0.26	0.17	0.02	0.34	0.08	-0.12
ILF3	3609		0.18	0.1	0.12	0.19	0.19	0.19	1.29	0.54	0.74	0.98	-0.12
H6PD	9563	00030|01100|01200	-0.27	0.14	0.24	0.46	0.46	0.46	0.64	0.28	0.55	1.38	-0.12
MAP7D1	55700		-0.03	-0.16	0.42	0.21	0.21	0.21	0.1	0.88	3.12	2.97	-0.12
GNAS	2778	01522|04015|04020|04024|04072|04261|04270|04540|04611|04713|04714|04724|04726|04728|04730|04750|04911|04912|04913|04915|04916|04918|04921|04922|04923|04924|04925|04926|04927|04928|04934|04961|04962|04970|04971|04972|04976|05030|05031|05032|05034|05110|05142|05146|05163|05165|05200|05414	0.24	0.2	-0.03	0.24	0.24	0.24	1.34	1.05	0.1	1.13	-0.12
COL5A1	1289	04974	-0.48	0.54	0.24	0.47	0.47	0.47	1.33	1.55	0.52	3.36	-0.3
PRKCB	5579	01521|04010|04012|04014|04015|04020|04062|04064|04066|04070|04071|04150|04270|04310|04370|04510|04540|04650|04662|04666|04670|04713|04720|04723|04724|04725|04726|04727|04728|04730|04750|04911|04912|04916|04918|04919|04921|04925|04928|04931|04933|04960|04961|04970|04971|04972|04973|05031|05032|05140|05143|05146|05161|05163|05164|05170|05200|05205|05206|05214|05223|05225|05231	0.15	-0.18	0.07	0.44	0.44	0.44	0.31	0.41	0.13	0.19	-0.12
NEXN	91624		0	0.22	-0.55	0.5	0.5	0.5	0.01	0.43	1.46	1.04	-0.12
GFPT1	2673	00250|00520|01100|04931	-0.1	-0.03	0.35	0.18	0.18	0.18	0.54	0.16	2.94	3.75	-0.12
COL4A3	1285	04151|04510|04512|04926|04933|04974|05146|05165|05200|05222	-0.03	0.36	-0.01	0.38	0.38	0.38	0.05	1.23	0.02	0.85	-0.12
RUVBL2	10856		0.16	-0.05	0.2	0.23	0.23	0.23	0.78	0.18	1.08	0.51	-0.12
YWHAG	7532	04110|04114|04151|04390|05169|05203	0.03	0.11	0.09	0.23	0.23	0.23	0.12	0.49	0.37	0.51	-0.12
ACTR1A	10121		-0.02	-0.05	0.4	0.27	0.27	0.27	0.06	0.16	2.23	2.28	-0.12
HMGB2	3148		0.4	0.04	-0.09	0.4	0.4	0.4	1.31	0.08	0.21	1.19	-0.12
HGH1	51236		0.16	-0.45	0.26	0.49	0.49	0.49	0.31	1.18	0.56	0.59	-0.12
RPL28	6158	03010	0.19	0.25	-0.16	0.53	0.53	0.53	0.35	0.48	0.27	0.25	-0.12
TMEM263	90488		0.08	0.54	0.18	0.47	0.47	0.47	0.14	1.54	0.38	1.65	-0.13
EMC1	23065		-0.09	-0.21	0.18	0.27	0.27	0.27	0.32	0.91	0.73	0.66	-0.12
MRPS36	92259		0.09	0.52	0	0.39	0.39	0.39	0.2	1.91	0	1.45	-0.13
MICAL1	64780		-0.11	-0.23	0.12	0.27	0.27	0.27	0.4	1.02	0.46	0.59	-0.12
HNRNPK	3190	03040|05168|05203|05206	0.1	0.13	0.06	0.2	0.2	0.2	0.55	0.76	0.31	0.63	-0.12
RPS29	6235	03010	0.12	0.09	0	0.27	0.27	0.27	0.44	0.31	0.01	0.15	-0.12
TOP2B	7155	01524	-0.05	-0.29	0.6	0.32	0.32	0.32	0.13	1.11	2.95	2.75	-0.12
NAPA	8775	04721	-0.02	-0.21	0.25	0.22	0.22	0.22	0.09	1.26	1.6	1.23	-0.12
ATP1A1	476	04022|04024|04260|04261|04911|04918|04919|04925|04960|04961|04964|04970|04971|04972|04973|04974|04976|04978	-0.02	0	0.11	0.23	0.23	0.23	0.08	0.01	0.48	0.3	-0.12
STRAP	11171	03013	0.13	0.01	0.11	0.21	0.21	0.21	0.72	0.03	0.53	0.27	-0.12
SRSF7	6432	03040|05168	0.12	0.17	0.11	0.31	0.31	0.31	0.35	0.59	0.34	0.5	-0.12
CCDC47	57003		0.04	0.08	0.03	0.22	0.22	0.22	0.15	0.32	0.09	0.1	-0.12
HECTD1	25831		0.03	0.04	0.01	0.24	0.24	0.24	0.08	0.13	0.05	0.01	-0.12
GALNT2	2590	00512|01100	-0.09	0.03	0.17	0.26	0.26	0.26	0.34	0.1	0.74	1.05	-0.12
DDX3X	1654	04622|05161|05203	0.13	0	0.14	0.19	0.19	0.19	0.8	0.01	0.84	0.44	-0.12
TBCD	6904		0.13	-0.22	0.16	0.24	0.24	0.24	0.57	1.14	0.73	0.68	-0.12
ANKHD1	404734		0.25	-0.12	0.21	0.47	0.47	0.47	0.55	0.22	0.46	0.17	-0.12
PDIA5	10954		-0.05	0.26	0.3	0.4	0.4	0.4	0.09	0.73	0.86	1.7	-0.12
U2AF1	7307	03040|05131	0.29	0.28	0.19	0.38	0.38	0.38	0.92	0.89	0.52	1	-0.12
OSBPL3	26031		-0.09	0.3	-0.17	0.72	0.72	0.72	0.1	0.4	0.2	0.08	-0.12
WASHC4			-0.2	-0.21	0.31	0.37	0.37	0.37	0.58	0.59	1.01	1.19	-0.12
VPS45	11311	04144	-0.08	-0.21	0.21	0.41	0.41	0.41	0.17	0.52	0.54	0.32	-0.12
RANBP2	5903	03013	0.12	0	0.19	0.2	0.2	0.2	0.64	0.01	1.21	0.74	-0.12
ZMPSTE24	10269	00900	0.07	0.01	0.05	0.36	0.36	0.36	0.17	0.01	0.11	0.01	-0.12
MAVS	57506	04621|04622|04623|05160|05161|05162|05164|05168	-0.21	-0.17	-0.17	0.35	0.35	0.35	0.67	0.51	0.52	0.61	-0.12
ISOC2	79763		-0.28	-0.04	-0.16	0.38	0.38	0.38	0.86	0.07	0.4	0.31	-0.12
TRIP12	9320	04120	0.04	0.12	0.14	0.36	0.36	0.36	0.1	0.3	0.38	0.34	-0.12
PCOLCE	5118		-0.05	0.17	0.17	0.44	0.44	0.44	0.08	0.37	0.37	0.56	-0.12
TRPV2	51393	04621|04750	0.1	-0.07	0.5	0.67	0.67	0.67	0.12	0.08	0.89	0.48	-0.12
ERO1A			-0.02	-0.15	0.33	0.24	0.24	0.24	0.05	0.69	2.04	1.7	-0.12
ETF1	2107	03015	0.02	-0.22	0.05	0.21	0.21	0.21	0.09	1.39	0.21	0.81	-0.12
DUT	1854	00240|00983|01100	0.61	-0.36	-0.07	0.48	0.48	0.48	1.81	0.88	0.11	2.54	-0.15
SARNP	84324		0.16	0.04	0.2	0.24	0.24	0.24	0.75	0.15	0.99	0.69	-0.12
DYNC2H1	79659	04145|04962|05132	-0.26	0.27	-0.37	0.98	0.98	0.98	0.26	0.27	0.4	0.09	-0.12
ANXA1	301		-0.12	0.05	0.05	0.26	0.26	0.26	0.46	0.16	0.16	0.45	-0.12
RPL27A	6157	03010	0.26	0.1	0.1	0.28	0.28	0.28	1.17	0.33	0.34	0.59	-0.12
LETM1	3954		-0.06	0.29	-0.38	0.29	0.29	0.29	0.16	1.32	1.9	1.27	-0.12
EFHD2	79180		-0.19	0.03	0.4	0.26	0.26	0.26	0.85	0.08	2.31	3.63	-0.12
DDRGK1	65992		-0.16	0.07	0.35	0.27	0.27	0.27	0.62	0.23	1.84	3.05	-0.12
TIPRL	261726		-0.01	0.03	0.26	0.27	0.27	0.27	0.02	0.09	1.24	1.29	-0.12
BCAT2	587	00270|00280|00290|00770|01100|01210|01230	0.02	0.15	-0.12	0.34	0.34	0.34	0.05	0.44	0.34	0.12	-0.12
DDX17	10521		0.17	0.02	0.25	0.19	0.19	0.19	1.06	0.1	1.87	1.5	-0.12
RPS27A	6233	03010	0.2	0.52	-0.11	0.47	0.47	0.47	0.42	1.51	0.21	0.88	-0.19
EPB41L2	2037		-0.02	0.01	0.27	0.25	0.25	0.25	0.07	0.02	1.39	1.47	-0.12
PCNP	57092		0.31	0.34	-0.14	0.36	0.36	0.36	1.07	1.2	0.37	1.13	-0.12
UFL1	23376		-0.04	0.02	0.13	0.37	0.37	0.37	0.09	0.05	0.32	0.2	-0.12
MAN1B1	11253	00510|01100|04141	-0.13	-0.2	0.49	0.35	0.35	0.35	0.35	0.61	2.08	2.17	-0.12
SUMO2	6613	03013|05418	0.04	0.51	0.18	0.42	0.42	0.42	0.08	1.69	0.42	1.92	-0.23
FHL2	2274	04380	-0.08	0.5	0.27	0.24	0.24	0.24	0.32	3.25	1.53	5.12	-0.27
RCN1	5954		-0.09	0.49	-0.02	0.22	0.22	0.22	0.39	3.61	0.07	3.62	-0.19
FAM162A	26355		-0.14	0.05	0.43	0.42	0.42	0.42	0.35	0.09	1.35	1.64	-0.12
CCT4	10575		0.03	0.02	0.07	0.17	0.17	0.17	0.17	0.08	0.4	0.15	-0.12
MSH2	4436	01524|03430|05200|05210	0.52	-0.61	0.28	0.38	0.38	0.38	2	2.48	0.89	2.85	-0.15
ATAD3A	55210		0	-0.16	0.05	0.2	0.2	0.2	0.01	0.99	0.2	0.43	-0.13
ATP1B3	483	04022|04024|04260|04261|04911|04918|04919|04925|04960|04961|04964|04970|04971|04972|04973|04974|04976|04978	0.03	-0.18	0.31	0.3	0.3	0.3	0.08	0.67	1.35	0.78	-0.13
SUPT16H	11198		0.19	-0.14	0.08	0.28	0.28	0.28	0.74	0.5	0.23	0.51	-0.13
RPS4X	6191	03010	0.1	-0.01	0.07	0.23	0.23	0.23	0.46	0.04	0.26	0.09	-0.13
EWSR1	2130	05202	-0.02	0.08	0.25	0.27	0.27	0.27	0.04	0.26	1.18	1.5	-0.13
UMPS	7372	00240|00983|01100	0.08	-0.26	-0.01	0.26	0.26	0.26	0.28	1.31	0.04	1.26	-0.13
CAT	847	00380|00630|01200|04068|04146|04211|04213|05014	-0.26	-0.08	-0.05	0.28	0.28	0.28	1.18	0.25	0.16	0.59	-0.13
TCEA1	6917		0.36	0.55	-0.15	0.53	0.53	0.53	0.79	1.37	0.25	0.96	-0.13
EMD	2010	05410|05412|05414	0.22	0.46	0.23	0.26	0.26	0.26	1.08	2.81	1.16	3.53	-0.21
BSG	682		0.08	0.26	-0.08	0.26	0.26	0.26	0.3	1.35	0.27	0.71	-0.13
PYGL	5836	00500|01100|04217|04910|04922|04931	-0.15	-0.17	-0.04	0.31	0.31	0.31	0.5	0.55	0.1	0.31	-0.13
ACOT9	23597		-0.15	0.14	0	0.24	0.24	0.24	0.66	0.61	0	0.83	-0.13
ATP5L	10632	00190|01100|04714	-0.03	-0.02	0.11	0.22	0.22	0.22	0.12	0.07	0.51	0.32	-0.13
UGDH	7358	00040|00053|00520|01100	0.18	0.11	0.01	0.23	0.23	0.23	0.93	0.48	0.02	0.51	-0.13
NPTN	27020		0.33	0.08	0.09	0.43	0.43	0.43	0.89	0.15	0.17	0.35	-0.13
TLN2	83660	04015|04510|04611|05166	-0.03	-0.02	0.45	0.36	0.36	0.36	0.06	0.05	1.74	1.79	-0.13
TUBB	203068	04145|04540|05130	-0.03	-0.15	0.24	0.17	0.17	0.17	0.12	1.1	2.11	1.78	-0.13
ITCH	83737	04120|04144|04668|04932	0.49	0.58	0	0.73	0.73	0.73	0.77	0.96	0	0.66	-0.13
RABGAP1	2844		0.22	0.46	-0.34	0.39	0.39	0.39	0.59	1.61	1.06	1.37	-0.18
DIAPH1	1729	04510|04810|04933|05131	0	-0.31	0.29	0.3	0.3	0.3	0.01	1.34	1.23	0.87	-0.13
EIF2S2	8894	03013	0.01	0.08	0.11	0.18	0.18	0.18	0.05	0.41	0.7	0.9	-0.13
UBE2M	9040	04120	-0.04	-0.01	0.24	0.17	0.17	0.17	0.21	0.05	2.06	2.42	-0.13
GTF2F1	2962	03022	0.1	0.16	-0.15	0.5	0.5	0.5	0.18	0.33	0.29	0.14	-0.13
FUBP1	8880		0.09	0.06	0.08	0.31	0.31	0.31	0.27	0.18	0.23	0.1	-0.13
TRIM28	10155		0.15	-0.1	0.39	0.22	0.22	0.22	0.78	0.45	2.66	1.91	-0.13
PSMD4	5710	03050|05169	-0.06	-0.02	0.13	0.18	0.18	0.18	0.33	0.08	0.84	0.94	-0.13
DDX1	1653		-0.18	-0.04	0.25	0.23	0.23	0.23	0.9	0.13	1.44	2.36	-0.13
CHTOP	26097		0.1	0.42	-0.02	0.29	0.29	0.29	0.31	2.11	0.05	1.56	-0.29
THRAP3	9967		-0.02	0.13	0.13	0.26	0.26	0.26	0.05	0.51	0.54	0.92	-0.13
PLOD3	8985	00310|00514	-0.19	0.04	0.16	0.22	0.22	0.22	1.05	0.15	0.83	2.11	-0.13
TTN	7273	05410|05414	0.02	0.1	0.19	0.23	0.23	0.23	0.08	0.43	0.99	1.28	-0.13
AKAP9	10142		-0.38	0.19	0.11	1.05	1.05	1.05	0.34	0.15	0.08	0.23	-0.13
MAP2K2			0	0.06	0.11	0.31	0.31	0.31	0.01	0.17	0.33	0.24	-0.13
PCNA	5111	03030|03410|03420|03430|04110|04530|05161|05166	0.51	-0.17	0.08	0.38	0.38	0.38	1.92	0.45	0.18	1.7	-0.1
HSP90AB2P			-0.16	0.61	0.33	0.62	0.62	0.62	0.22	1.26	0.56	2.04	-0.13
CCDC50	152137		0.18	0.14	0.14	0.49	0.49	0.49	0.36	0.26	0.27	0.18	-0.13
PSIP1	11168		0.5	0.03	0.43	0.35	0.35	0.35	2.1	0.07	1.71	1.57	-0.11
DYNLRB1	83658		-0.27	-0.26	0.7	0.36	0.36	0.36	0.88	0.81	3.02	3.73	-0.13
PYM1			0.16	0.26	0.13	0.38	0.38	0.38	0.44	0.77	0.32	0.64	-0.13
RPL19	6143	03010	-0.11	0.13	0.09	0.22	0.22	0.22	0.51	0.6	0.41	1.4	-0.13
SNX12	29934	04144	-0.15	0.42	0.14	0.32	0.32	0.32	0.45	1.85	0.42	2.69	-0.11
NUP107	57122	03013	-0.04	0.11	-0.29	0.41	0.41	0.41	0.08	0.27	0.84	0.4	-0.13
MAT2A	4144	00270|01100|01230	0.14	0.03	0.21	0.27	0.27	0.27	0.56	0.08	0.91	0.53	-0.13
TRMT112	51504		0	-0.26	0.31	0.28	0.28	0.28	0	1.15	1.49	1.02	-0.13
DRG1	4733		0.02	-0.08	0.02	0.24	0.24	0.24	0.07	0.33	0.07	0.06	-0.13
FLOT2	2319	04910	-0.06	-0.02	0.14	0.28	0.28	0.28	0.2	0.06	0.52	0.42	-0.13
CSDE1	7812		0.32	0.15	0.15	0.31	0.31	0.31	1.34	0.51	0.51	0.85	-0.13
SPEN	23013		-0.19	-0.31	0.34	0.36	0.36	0.36	0.58	1.09	1.22	1.37	-0.13
PRPF40A	55660	03040	-0.1	-0.19	0.4	0.5	0.5	0.5	0.16	0.36	0.97	0.73	-0.13
GOLGA2	2801		-0.18	0.04	0.25	0.31	0.31	0.31	0.62	0.09	0.96	1.72	-0.13
ADK	132	00230|01100	0.07	-0.12	0.29	0.31	0.31	0.31	0.2	0.36	1.18	0.59	-0.13
EEF2	1938	04152|04921	0.12	-0.11	0.14	0.22	0.22	0.22	0.6	0.54	0.72	0.34	-0.13
CCT6A	908		0.08	-0.03	0.02	0.16	0.16	0.16	0.5	0.14	0.1	0.18	-0.13
SIL1	64374	04141	-0.22	-0.01	-0.08	0.24	0.24	0.24	1.15	0.03	0.32	0.51	-0.13
DLD	1738	00010|00020|00260|00280|00620|00630|00640|01100|01200	-0.04	0.1	0.04	0.25	0.25	0.25	0.15	0.4	0.13	0.34	-0.13
RPS14	6208	03010	0.11	-0.1	0.16	0.2	0.2	0.2	0.57	0.49	0.99	0.41	-0.13
BTF3	689		0.25	-0.24	0.29	0.3	0.3	0.3	0.97	0.93	1.21	0.79	-0.13
AP3M1	26985	04142	-0.14	-0.24	0.33	0.26	0.26	0.26	0.55	1.19	1.79	1.94	-0.13
DCTN2	10540	04962|05016	0	0.02	0.33	0.27	0.27	0.27	0.01	0.07	1.69	1.84	-0.13
SNU13			0.18	0.13	0.08	0.29	0.29	0.29	0.68	0.44	0.24	0.36	-0.13
TPM4			0	0.41	0.18	0.22	0.22	0.22	0.01	2.94	0.99	3.99	-0.21
ATP5J	522	00190|01100|04714|05010|05012|05016	-0.19	0.13	0.09	0.29	0.29	0.29	0.74	0.43	0.28	1.24	-0.13
RPS26	6231	03010	0.19	-0.24	0.25	0.43	0.43	0.43	0.43	0.59	0.63	0.28	-0.13
RPSA			0.09	-0.17	0.17	0.15	0.15	0.15	0.66	1.47	1.46	1.02	-0.13
KLC1	3831	05132	0.03	0.08	0.35	0.2	0.2	0.2	0.12	0.42	2.74	3.41	-0.13
SNRPD2	6633	03040	0.2	0.19	0.14	0.33	0.33	0.33	0.66	0.61	0.42	0.61	-0.13
RECQL	5965		-0.07	-0.09	0.3	0.2	0.2	0.2	0.32	0.46	2.27	2.44	-0.13
PRRC2C	23215		0.04	0.07	0.29	0.27	0.27	0.27	0.11	0.22	1.43	1.55	-0.13
NUDT5	11164	00230	0.04	-0.01	0.19	0.3	0.3	0.3	0.1	0.02	0.69	0.35	-0.13
ARPC1A	10552	04144|04666|04810|05100|05130|05131|05132	-0.03	-0.14	0.17	0.2	0.2	0.2	0.13	0.84	1.08	0.75	-0.13
HNRNPH1	3187		0.16	0.09	0.2	0.22	0.22	0.22	0.81	0.37	1.1	1.03	-0.13
SPATS2L	26010		0.03	0.1	0.37	0.22	0.22	0.22	0.09	0.46	2.6	3.33	-0.13
HNRNPUL2	221092		0.13	0.12	0.27	0.21	0.21	0.21	0.64	0.62	1.8	2.14	-0.14
STT3A	3703	00510|01100|04141	0.02	0.05	0.1	0.22	0.22	0.22	0.08	0.19	0.48	0.36	-0.14
PCYOX1	51449	00900	-0.23	-0.01	0.03	0.41	0.41	0.41	0.58	0.02	0.06	0.29	-0.14
COX5B	1329	00190|01100|04260|04714|04932|05010|05012|05016	0.07	0.4	-0.04	0.25	0.25	0.25	0.24	2.44	0.15	1.81	-0.14
PALLD	23022		0.03	-0.07	0.63	0.28	0.28	0.28	0.09	0.24	3.64	3.73	-0.14
PITRM1	10531		-0.08	-0.09	0.21	0.29	0.29	0.29	0.24	0.29	0.82	0.67	-0.14
HNRNPD	3184		0.03	0.16	0.07	0.28	0.28	0.28	0.09	0.61	0.23	0.47	-0.14
PACSIN2	11252		-0.06	0.04	0.18	0.25	0.25	0.25	0.22	0.15	0.84	1.12	-0.14
DHX15	1665	03040	0.22	-0.17	0.36	0.21	0.21	0.21	1.43	1.02	2.69	1.78	-0.14
NUTF2	10204		-0.1	-0.12	0.33	0.28	0.28	0.28	0.35	0.41	1.64	1.74	-0.14
TP53I3	9540	04115	-0.25	0.4	0.1	0.32	0.32	0.32	0.94	1.7	0.29	2.8	-0.16
FDPS	2224	00900|01100|05164|05166	0.06	-0.06	-0.02	0.36	0.36	0.36	0.13	0.13	0.05	0.06	-0.14
ALDH16A1	126133		0.06	-0.1	0.09	0.36	0.36	0.36	0.15	0.26	0.21	0.04	-0.14
AP2A1	160	04144|04721|04961|05016	-0.02	0.07	0.1	0.31	0.31	0.31	0.04	0.19	0.3	0.26	-0.14
MST065			0.06	-0.02	0.01	0.28	0.28	0.28	0.18	0.07	0.04	0.02	-0.14
PPP1CA	5499	03015|04022|04024|04114|04218|04261|04270|04390|04510|04611|04720|04728|04750|04810|04910|04921|04931|05031|05034|05168|05205	0.01	-0.19	0.3	0.19	0.19	0.19	0.04	1.31	2.32	1.78	-0.14
HNRNPM	4670	03040	0	0.15	0.11	0.24	0.24	0.24	0	0.74	0.45	1	-0.14
UBE2O	63893	04120	-0.12	0.47	-0.59	0.81	0.81	0.81	0.12	0.62	0.85	0.35	-0.14
RAD23B	5887	03420|04141	0.15	0.25	-0.08	0.26	0.26	0.26	0.63	1.26	0.3	0.8	-0.14
MARS	4141	00450|00970	-0.07	-0.15	0.29	0.21	0.21	0.21	0.3	0.82	1.97	1.9	-0.14
OSBP	5007		-0.15	0	0.15	0.26	0.26	0.26	0.65	0	0.62	1.14	-0.14
C7orf55	154791		0.22	0.42	-0.06	0.43	0.43	0.43	0.53	1.28	0.11	0.77	-0.14
HN1L	90861		0.11	0.04	0.21	0.35	0.35	0.35	0.3	0.09	0.67	0.35	-0.14
BAX	581	01521|01522|01524|04071|04115|04141|04210|04211|04215|04217|04722|04932|04933|05014|05016|05020|05152|05161|05163|05165|05166|05167|05170|05200|05202|05203|05210|05212|05213|05214|05216|05217|05218|05220|05222|05223|05224|05225|05226	0.07	0.37	-0.11	0.34	0.34	0.34	0.18	1.46	0.31	0.76	-0.14
COPS3	8533		0.34	0.13	0.17	0.6	0.6	0.6	0.62	0.19	0.26	0.21	-0.14
GNG12	55970	04010|04014|04062|04151|04371|04713|04723|04724|04725|04726|04727|04728|04810|04926|05032|05034|05163|05167|05170|05200	-0.1	0.1	-0.23	0.35	0.35	0.35	0.25	0.27	0.72	0.22	-0.14
PSMD3	5709	03050|05169	0.02	-0.03	0.1	0.22	0.22	0.22	0.08	0.11	0.48	0.13	-0.14
RPL7A	6130	03010	0.16	0.07	0.11	0.28	0.28	0.28	0.65	0.23	0.37	0.28	-0.14
LZIC	84328		-0.04	-0.08	0.43	0.26	0.26	0.26	0.11	0.26	2.53	2.64	-0.14
TOMM70			-0.12	0.03	0.08	0.2	0.2	0.2	0.69	0.11	0.4	1.01	-0.14
STX18	53407	04130|04145	-0.54	-0.23	-0.34	0.82	0.82	0.82	0.75	0.26	0.41	0.35	-0.14
BAG3	9531		0.11	0.07	0.14	0.26	0.26	0.26	0.41	0.23	0.56	0.36	-0.14
CD59	966	04610|04640	0.07	0.33	0.15	0.44	0.44	0.44	0.14	0.91	0.33	0.88	-0.14
RPS15A	6210	03010	0.08	-0.03	0.1	0.17	0.17	0.17	0.51	0.13	0.65	0.22	-0.14
PRKCDBP	112464		0.03	-0.06	0.23	0.29	0.29	0.29	0.08	0.18	0.98	0.54	-0.14
OLA1	29789		0.09	-0.1	0.26	0.18	0.18	0.18	0.52	0.63	2.13	1.34	-0.14
LSG1	55341	03008	0	0.14	0.23	0.37	0.37	0.37	0	0.4	0.72	0.89	-0.14
CDC5L	988	03040	0.05	-0.1	0.24	0.22	0.22	0.22	0.21	0.46	1.42	0.79	-0.14
CCT8	10694		0.07	0.02	0.07	0.16	0.16	0.16	0.44	0.1	0.42	0.18	-0.14
BCLAF1	9774		0.13	0.05	0.21	0.18	0.18	0.18	0.85	0.24	1.61	1.41	-0.14
SAR1A	56681	04141|05134	0.13	0.01	0.05	0.22	0.22	0.22	0.64	0.03	0.2	0.18	-0.14
TUBB6	84617	04145|04540|05130	0.04	0	0.11	0.21	0.21	0.21	0.15	0.01	0.54	0.21	-0.14
EIF3K	27335		0.22	-0.1	0.12	0.27	0.27	0.27	1	0.36	0.42	0.52	-0.14
EPS15	2060	04144	0.01	0.07	0.22	0.31	0.31	0.31	0.02	0.2	0.81	0.82	-0.14
YWHAE	7531	04110|04114|04151|04390|04722|05169|05203	-0.08	0.03	0.1	0.16	0.16	0.16	0.53	0.17	0.66	1.29	-0.14
GLS	2744	00220|00250|00471|01100|04724|04727|04964|05206|05230	0.18	0.05	0.6	0.29	0.29	0.29	0.67	0.14	3.29	3.33	-0.14
SPAG9	9043		0.05	0.03	0.46	0.25	0.25	0.25	0.18	0.09	2.89	3.13	-0.14
LAMTOR1	55004	04150	-0.15	-0.15	0.02	0.26	0.26	0.26	0.62	0.66	0.05	0.4	-0.14
ARL1	400		-0.26	-0.18	0.55	0.25	0.25	0.25	1.37	0.86	3.54	4.67	-0.14
PPFIBP1	8496		-0.2	-0.15	0.2	0.23	0.23	0.23	1.07	0.74	1.08	1.77	-0.14
KARS	3735	00970	0.09	0.01	0.21	0.16	0.16	0.16	0.57	0.04	1.92	1.57	-0.14
PABPC4	8761	03013|03015|03018	0.23	-0.13	0.31	0.25	0.25	0.25	1.15	0.54	1.71	0.99	-0.14
UBE2K	3093	04120	0.11	-0.09	0.15	0.23	0.23	0.23	0.47	0.37	0.73	0.25	-0.14
USP9X	8239		-0.15	0	0.06	0.27	0.27	0.27	0.59	0.01	0.19	0.47	-0.14
PRDX1	5052	04146	0.06	0.11	0.08	0.21	0.21	0.21	0.24	0.53	0.37	0.49	-0.14
COMT	1312	00140|00350|01100|04728	-0.1	0.05	0.17	0.25	0.25	0.25	0.4	0.16	0.76	1.25	-0.14
AKR1B1	231	00040|00051|00052|00561|00790|01100	0.18	0.08	0.26	0.27	0.27	0.27	0.74	0.27	1.26	1.08	-0.14
CLPTM1	1209		0.16	-0.11	-0.16	0.44	0.44	0.44	0.35	0.22	0.35	0.68	-0.14
EIF4G1	1981	03013|05416	0.07	0.05	0.1	0.24	0.24	0.24	0.26	0.16	0.42	0.21	-0.14
PRKAR1A	5573	04910	-0.07	0.02	0.06	0.23	0.23	0.23	0.29	0.06	0.24	0.3	-0.14
PSPC1	55269		0.04	-0.15	0.17	0.32	0.32	0.32	0.1	0.48	0.56	0.18	-0.14
PDIA3	2923	04141|04612|05163|05170	-0.09	0.38	0.3	0.24	0.24	0.24	0.39	2.36	1.74	4.65	-0.19
SNRNP200	23020	03040	0.01	-0.19	0.3	0.22	0.22	0.22	0.03	1.05	2	1.46	-0.14
MCM6	4175	03030|04110	0.48	-0.41	-0.09	0.34	0.34	0.34	2.05	1.64	0.22	3.63	-0.19
ACBD3	64746		-0.12	0.2	0.18	0.21	0.21	0.21	0.63	1.3	1.13	3.28	-0.14
DNAJC3	5611	04141|05164	0.11	-0.16	0.47	0.25	0.25	0.25	0.44	0.71	2.92	2.24	-0.14
IAH1	285148		-0.09	0.05	0.32	0.37	0.37	0.37	0.2	0.1	1.05	1.31	-0.14
EIF4A2	1974	03013	0.04	0.18	0.43	0.22	0.22	0.22	0.16	0.97	3.06	4.27	-0.14
NAV1	89796		0.16	0.32	0.22	0.52	0.52	0.52	0.28	0.68	0.41	0.68	-0.14
EIF2B1	1967	03013	0.09	-0.36	-0.09	0.4	0.4	0.4	0.2	1.13	0.19	1.26	-0.14
CD44	960	04512|04640|05131|05169|05205|05206	0.14	0.38	0.23	0.27	0.27	0.27	0.56	2.07	1.06	2.84	-0.2
SAFB	6294		-0.01	-0.07	0.29	0.22	0.22	0.22	0.04	0.28	1.96	1.81	-0.14
TXNDC5			-0.06	0.16	0.53	0.25	0.25	0.25	0.19	0.72	3.36	4.8	-0.14
CCT2	10576		0.13	-0.09	0.14	0.23	0.23	0.23	0.58	0.39	0.66	0.26	-0.14
ACTR1B	10120		0.55	-0.9	-0.19	1.03	1.03	1.03	0.6	1.12	0.17	1.42	-0.14
COLGALT1	79709	00310|00514	0.04	0.38	-0.1	0.27	0.27	0.27	0.11	2.01	0.34	1.26	-0.11
SSR4	6748	04141	-0.19	-0.11	0.08	0.23	0.23	0.23	0.98	0.47	0.3	0.83	-0.14
APRT	353	00230|01100	-0.22	0.05	-0.05	0.33	0.33	0.33	0.74	0.14	0.11	0.34	-0.14
RPS3	6188	03010	0.09	-0.09	0.07	0.16	0.16	0.16	0.6	0.61	0.41	0.39	-0.14
MMS19	64210		-0.07	-0.28	0	0.34	0.34	0.34	0.17	1.02	0	0.56	-0.14
PSMD2	5708	03050|05169	0.11	-0.18	0.19	0.2	0.2	0.2	0.57	1.12	1.19	0.72	-0.14
ADD3	120		-0.24	0.3	-0.09	0.29	0.29	0.29	0.99	1.35	0.29	1.45	-0.14
G3BP1	10146		0.26	-0.09	0.23	0.29	0.29	0.29	1.08	0.27	0.96	0.56	-0.14
MAP2K1	5604	01521|01522|04010|04012|04014|04015|04022|04024|04062|04066|04068|04071|04072|04114|04140|04150|04151|04210|04218|04270|04370|04371|04380|04510|04540|04550|04620|04650|04660|04662|04664|04666|04668|04720|04722|04725|04726|04730|04810|04910|04912|04914|04915|04916|04917|04919|04921|04926|04928|04934|05020|05034|05161|05163|05164|05165|05167|05170|05200|05205|05206|05210|05211|05212|05213|05214|052…	0.16	-0.02	0.34	0.24	0.24	0.24	0.71	0.05	2.04	1.54	-0.14
PDHA1	5160	00010|00020|00620|01100|01200|04066|04922|05230	0.08	0.21	-0.04	0.27	0.27	0.27	0.27	0.95	0.12	0.42	-0.14
PSMA6	5687	03050	-0.13	0.04	0.02	0.21	0.21	0.21	0.68	0.17	0.08	0.55	-0.14
RBM39	9584		0.12	-0.12	0.21	0.25	0.25	0.25	0.51	0.46	1.02	0.41	-0.14
THOP1	7064	04614|05143	0.03	-0.15	0.18	0.19	0.19	0.19	0.14	0.92	1.22	0.66	-0.14
INF2	64423		0.1	-0.24	0.16	0.5	0.5	0.5	0.17	0.49	0.31	0.13	-0.14
ECI2	10455	00071|04146	-0.3	-0.03	0.29	0.35	0.35	0.35	1.08	0.08	1.04	2.1	-0.14
SARS	6301	00970	-0.16	0.02	-0.01	0.2	0.2	0.2	0.92	0.09	0.03	0.56	-0.14
SNRPA	6626	03040	-0.1	-0.07	0.28	0.21	0.21	0.21	0.49	0.28	1.85	2.26	-0.14
KDELC2	143888		0.03	0.15	0.28	0.29	0.29	0.29	0.08	0.54	1.27	1.79	-0.14
NAA10	8260		0.05	0.1	0.07	0.25	0.25	0.25	0.17	0.41	0.24	0.26	-0.14
AIMP1	9255		-0.03	-0.01	0.21	0.17	0.17	0.17	0.13	0.04	1.7	1.86	-0.14
RPL30			0.01	-0.27	0	0.26	0.26	0.26	0.04	1.36	0	1.01	-0.14
SRP9	6726	03060	0.01	0.06	0.16	0.4	0.4	0.4	0.03	0.12	0.4	0.24	-0.14
KPNB1	3837	03013	0.12	-0.18	0.09	0.18	0.18	0.18	0.73	1.32	0.52	1.01	-0.14
SMARCC2	6601	04714|05225	-0.02	0.06	0.23	0.22	0.22	0.22	0.06	0.23	1.4	1.77	-0.14
YES1	7525	04520	0.08	0	0.33	0.42	0.42	0.42	0.15	0.01	0.93	0.58	-0.14
GLOD4	51031		0.04	-0.01	0.25	0.19	0.19	0.19	0.16	0.06	1.83	1.6	-0.14
RPL23A	6147	03010	0.15	0.1	0.15	0.36	0.36	0.36	0.4	0.26	0.43	0.28	-0.14
RAB6A	5870		-0.12	0.21	0.2	0.34	0.34	0.34	0.34	0.69	0.65	1.68	-0.15
NDUFV2	4729	00190|01100|04714|04723|04932|05010|05012|05016	0.08	0.11	-0.02	0.31	0.31	0.31	0.23	0.35	0.05	0.09	-0.15
TJP2	9414	04530|05110	0.18	-0.08	0.38	0.56	0.56	0.56	0.29	0.12	0.78	0.29	-0.15
PRKDC	5591	03450|04110	-0.03	-0.12	0.15	0.16	0.16	0.16	0.18	0.93	1.26	0.97	-0.15
PTBP1	5725		0.07	-0.13	0.23	0.19	0.19	0.19	0.37	0.76	1.63	0.89	-0.15
CTNND1	1500	04015|04520|04670	0	0.18	0.3	0.21	0.21	0.21	0	1.03	2.05	3.39	-0.15
ERLIN2	11160		-0.09	0.04	-0.03	0.25	0.25	0.25	0.34	0.12	0.09	0.08	-0.15
EIF2S1	1965	03013|04140|04141|04210|04932|05160|05162|05164|05168	0.07	0.11	0.02	0.25	0.25	0.25	0.24	0.45	0.08	0.17	-0.15
STIP1	10963	05020	0.06	0.02	0.32	0.16	0.16	0.16	0.34	0.09	3.19	3.36	-0.15
TPD52L2	7165		-0.19	0.06	0.15	0.24	0.24	0.24	0.92	0.23	0.68	1.84	-0.15
PSMB1	5689	03050	-0.11	-0.14	0.15	0.19	0.19	0.19	0.65	0.86	0.92	1.15	-0.15
LAP3	51056	00330|00480|01100	-0.02	0.09	0	0.22	0.22	0.22	0.07	0.37	0.01	0.12	-0.15
RPL35A	6165	03010	0.01	0.15	-0.1	0.34	0.34	0.34	0.03	0.44	0.25	0.09	-0.15
PGRMC2	10424		0.13	0.38	-0.21	0.33	0.33	0.33	0.4	1.58	0.73	1.01	-0.18
HNRNPR	10236		0.16	0.05	0.11	0.19	0.19	0.19	1.06	0.24	0.63	0.58	-0.15
THBS2	7058	04145|04151|04510|04512|05144|05165	0.07	0.32	0.16	0.34	0.34	0.34	0.17	1.2	0.47	1.39	-0.15
RPL36AL	6166	03010	0.04	0.25	-0.02	0.42	0.42	0.42	0.08	0.64	0.03	0.23	-0.15
MGST3	4259	00480|00980|00982|00983|01524|05200|05204|05225|05418	-0.24	-0.11	0.13	0.39	0.39	0.39	0.69	0.25	0.31	0.59	-0.15
PMVK	10654	00900|01100|04146	0.06	0.02	0.36	0.43	0.43	0.43	0.12	0.03	1.01	0.74	-0.15
RBBP7	5931		0.43	0.18	0.22	0.4	0.4	0.4	1.45	0.45	0.6	0.91	-0.15
BCAP31	10134	04141|05165	-0.14	0.41	-0.2	0.43	0.43	0.43	0.29	1.24	0.46	0.66	-0.15
EML4	27436	05200|05223	-0.07	0.31	0.07	0.29	0.29	0.29	0.22	1.46	0.21	1.68	-0.15
PHB2	11331		0.13	0.02	-0.13	0.21	0.21	0.21	0.68	0.08	0.66	1.13	-0.15
PFAS	5198	00230|01100	0.02	0.01	0.02	0.2	0.2	0.2	0.08	0.03	0.08	0	-0.15
DDX21	9188		0.48	-0.43	0.01	0.35	0.35	0.35	1.97	1.7	0.02	3.14	-0.22
CPNE1	8904		0.06	0.09	0.23	0.5	0.5	0.5	0.09	0.14	0.46	0.28	-0.15
LMNB2	84823	04210	0.12	0.37	-0.04	0.18	0.18	0.18	0.78	3.31	0.21	2.66	-0.21
MTDH	92140		-0.03	0.05	0.36	0.25	0.25	0.25	0.12	0.19	2.13	2.73	-0.15
RPL3	6122	03010	0.05	-0.07	0.16	0.23	0.23	0.23	0.2	0.27	0.8	0.29	-0.15
LDHA	3939	00010|00270|00620|00640|01100|04066|04922|05230	0.19	0	0.25	0.27	0.27	0.27	0.78	0.01	1.17	0.7	-0.15
PSMD11	5717	03050|05169	-0.04	-0.04	0.04	0.2	0.2	0.2	0.16	0.15	0.16	0.05	-0.15
CPSF6	11052	03015	0.04	0.05	0.12	0.25	0.25	0.25	0.15	0.16	0.5	0.3	-0.15
RPS25	6230	03010	0.14	-0.04	0.11	0.31	0.31	0.31	0.44	0.09	0.32	0.09	-0.15
PDIA4	9601	04141|04918|05110	-0.21	0.37	0.09	0.24	0.24	0.24	1.06	2.27	0.38	3.59	-0.17
LAMP1	3916	04140|04142|04145|05152	-0.15	0.18	-0.44	0.35	0.35	0.35	0.44	0.54	1.81	1.07	-0.15
METAP1	23173		0.06	0.1	0.24	0.25	0.25	0.25	0.2	0.37	1.21	1.37	-0.15
MDH1	4190	00020|00270|00620|00630|01100|01200|04964	-0.15	0.18	0.07	0.19	0.19	0.19	0.96	1.22	0.34	2.43	-0.15
HEL-S-271			-0.12	-0.05	-0.02	0.23	0.23	0.23	0.51	0.2	0.06	0.14	-0.15
TBCB	1155		0.04	0.2	0	0.3	0.3	0.3	0.1	0.75	0.01	0.35	-0.15
COPB1	1315		-0.07	-0.17	0.31	0.17	0.17	0.17	0.38	1.28	2.86	2.9	-0.15
SDHB	6390	00020|00190|01100|01200|04714|04932|05010|05012|05016	-0.21	0.04	0.11	0.42	0.42	0.42	0.54	0.08	0.23	0.54	-0.15
TSN	7247		0.13	0.37	-0.07	0.3	0.3	0.3	0.43	1.69	0.19	1.05	-0.12
RPL10	6134	03010	0.16	0.14	0.18	0.3	0.3	0.3	0.57	0.48	0.65	0.69	-0.15
HMBS	3145	00860|01100	-0.17	-0.24	-0.26	0.46	0.46	0.46	0.36	0.55	0.62	0.76	-0.15
TUFM	7284		0.06	0.22	-0.21	0.26	0.26	0.26	0.21	1.06	1.02	0.82	-0.15
CAPZB	832	04144	-0.02	0.14	0.2	0.17	0.17	0.17	0.11	1.05	1.72	3.18	-0.15
CAND1			0.05	0	0.29	0.19	0.19	0.19	0.25	0	2.28	2.17	-0.15
HNRNPA3	220988	03040	0.1	0.22	-0.03	0.34	0.34	0.34	0.27	0.71	0.06	0.28	-0.15
PPP2R1A	5518	03015|04071|04114|04151|04152|04261|04350|04390|04530|04728|04730|05142|05160|05165	0.04	-0.03	0.13	0.2	0.2	0.2	0.2	0.15	0.76	0.28	-0.15
HK1	3098	00010|00051|00052|00500|00520|00524|01100|01200|04066|04910|04930|04973|05230	-0.08	-0.02	0.26	0.19	0.19	0.19	0.4	0.07	1.92	2.46	-0.15
SLC25A22	79751		0.21	-0.08	0.29	0.68	0.68	0.68	0.3	0.1	0.45	0.11	-0.15
SEPT2	4735	05100	0.04	0.08	0.05	0.25	0.25	0.25	0.12	0.3	0.16	0.13	-0.15
TNKS1BP1	85456		-0.1	0.36	0.27	0.21	0.21	0.21	0.47	2.58	1.75	4.9	-0.21
FKBP7	51661		-0.22	0.23	0.24	0.37	0.37	0.37	0.67	0.71	0.74	2.2	-0.15
RAB35	11021	04144	0.37	-0.06	0.08	0.9	0.9	0.9	0.4	0.05	0.07	0.09	-0.15
CYB5R3	1727	00520	-0.13	0	0.11	0.35	0.35	0.35	0.36	0.01	0.27	0.35	-0.15
GMPS	8833	00230|00983|01100	0.25	-0.22	0.24	0.27	0.27	0.27	1.14	0.98	1.07	0.9	-0.15
PRMT1	3276	04068|04922	-0.07	-0.19	0.11	0.21	0.21	0.21	0.3	1.1	0.56	0.61	-0.15
ALDH7A1	501	00010|00053|00071|00260|00280|00310|00330|00340|00380|00410|00561|00620|01100	0	0.13	0.1	0.26	0.26	0.26	0.01	0.52	0.39	0.66	-0.15
SEC11A	23478	03060	0.13	0.07	0.3	0.28	0.28	0.28	0.49	0.21	1.41	1.23	-0.15
SLC1A5	6510	04974|05230	-0.03	0.3	-0.3	0.35	0.35	0.35	0.06	1.06	1.08	0.64	-0.15
RPL8	6132	03010	0.08	0.01	0.1	0.31	0.31	0.31	0.25	0.03	0.3	0.06	-0.15
COPB2	9276		-0.04	-0.01	0.15	0.17	0.17	0.17	0.19	0.02	1.16	1.27	-0.15
ARF1	375	04072|04144|05110|05134	0.03	-0.1	0.15	0.2	0.2	0.2	0.1	0.5	0.89	0.37	-0.15
EIF3B	8662	03013	0.02	-0.1	0.01	0.22	0.22	0.22	0.07	0.43	0.04	0.13	-0.15
RPL22	6146	03010	-0.07	-0.03	0.08	0.22	0.22	0.22	0.29	0.13	0.36	0.29	-0.15
HADHB	3032	00062|00071|00280|01100|01212	-0.19	0.07	0.12	0.37	0.37	0.37	0.53	0.15	0.29	0.69	-0.15
RTCB	51493		-0.05	0	0.38	0.14	0.14	0.14	0.34	0.02	4.28	5.27	-0.15
SF1	7536		0.11	0.11	0.15	0.2	0.2	0.2	0.61	0.59	0.9	1.08	-0.15
NME1-NME2			-0.01	0.03	0	0.15	0.15	0.15	0.04	0.16	0	0.02	-0.15
STAT1	6772	04062|04217|04380|04620|04621|04625|04630|04658|04659|04917|04919|04933|05140|05145|05152|05160|05161|05162|05164|05165|05167|05168|05200|05212|05321	-0.31	-0.05	0.08	0.32	0.32	0.32	1.23	0.14	0.22	1.09	-0.15
RBM14	10432		-0.1	-0.01	0.27	0.22	0.22	0.22	0.45	0.02	1.69	2.29	-0.15
ESYT2	57488		-0.1	0.1	0.24	0.3	0.3	0.3	0.31	0.32	0.99	1.66	-0.15
NDUFS1	4719	00190|01100|04714|04723|04932|05010|05012|05016	0.09	0.08	0.22	0.28	0.28	0.28	0.29	0.27	0.93	0.84	-0.15
MBOAT7	79143	00564	-0.25	0.1	0.26	0.23	0.23	0.23	1.46	0.46	1.55	3.76	-0.15
NSFL1C	55968	04141	0.07	0.13	0.32	0.22	0.22	0.22	0.3	0.68	2.18	2.87	-0.15
RAB10	10890	04144|04152	-0.15	0.08	-0.06	0.24	0.24	0.24	0.71	0.33	0.24	0.36	-0.15
RPS13	6207	03010	0.14	-0.05	0.32	0.29	0.29	0.29	0.5	0.14	1.44	0.85	-0.15
YIPF5	81555		0.07	0.15	0.35	0.54	0.54	0.54	0.1	0.24	0.73	0.69	-0.15
RRM1	6240	00230|00240|00480|00983|01100	0.44	-0.58	-0.06	0.28	0.28	0.28	2.33	3.24	0.18	5.05	-0.2
PDCD10	11235		0.11	-0.29	0.4	0.43	0.43	0.43	0.23	0.77	1.17	0.56	-0.15
CHMP4B	128866	04144|04217	0.14	0.24	0.31	0.29	0.29	0.29	0.47	0.98	1.38	2.12	-0.15
EEF1D	1936	05168	-0.01	0.09	0.15	0.21	0.21	0.21	0.02	0.39	0.83	1.14	-0.15
CALU	813		0.05	0.35	0.38	0.28	0.28	0.28	0.15	1.75	1.97	3.8	-0.19
GRHPR	9380	00260|00620|00630|01100	0.05	-0.03	0.21	0.36	0.36	0.36	0.12	0.06	0.63	0.25	-0.15
PSMC5	5705	03050|05169	-0.14	0.03	0.07	0.25	0.25	0.25	0.62	0.1	0.24	0.67	-0.15
GOLGA4	2803		0	-0.13	0.11	1.18	1.18	1.18	0	0.09	0.07	0	-0.15
TMPO	7112		0.25	-0.1	0.4	0.3	0.3	0.3	1.05	0.31	1.92	1.18	-0.15
ATP6V1B2	526	00190|01100|04145|04150|04721|04966|05110|05120|05165|05323	-0.06	0.02	0.01	0.24	0.24	0.24	0.21	0.06	0.05	0.06	-0.15
HSPA4	3308	04530|04612	0.03	0.09	0.07	0.18	0.18	0.18	0.12	0.48	0.36	0.48	-0.15
PYCRL	65263	00330|01100|01230	-0.01	0.18	0.13	0.21	0.21	0.21	0.05	1.09	0.66	1.77	-0.15
HSPA1B	3304	03040|04010|04141|04144|04213|04612|04915|05134|05145|05162|05164|05169	0.43	0.31	0.32	0.35	0.35	0.35	1.67	1.08	1.16	1.9	-0.25
CSNK2B	1460	03008|04064|04137|04310|04520|05162|05168|05169	-0.04	0.04	0.31	0.21	0.21	0.21	0.17	0.17	2.17	2.84	-0.15
RNPS1	10921	03013|03015	0.05	-0.04	0.31	0.25	0.25	0.25	0.15	0.13	1.73	1.4	-0.16
ARF4	378		0.06	-0.06	0.21	0.27	0.27	0.27	0.2	0.19	0.91	0.4	-0.16
MIF	4282	00350|00360	-0.22	0.2	-0.12	0.46	0.46	0.46	0.47	0.42	0.22	0.25	-0.16
C19orf70	125988		-0.11	-0.22	0.08	0.32	0.32	0.32	0.31	0.8	0.23	0.34	-0.16
PSME4	23198	03050	0.01	0.12	0.13	0.31	0.31	0.31	0.03	0.38	0.41	0.5	-0.16
CSNK2A1	1457	03008|04064|04137|04310|04520|05162|05168|05169	0.18	-0.13	0.38	0.27	0.27	0.27	0.77	0.5	2.01	1.2	-0.16
EEF1G	1937	05134	0.1	-0.07	0.2	0.2	0.2	0.2	0.5	0.35	1.26	0.58	-0.16
RPS24	6229	03010	0.04	-0.26	0.02	0.28	0.28	0.28	0.11	1.16	0.07	0.76	-0.16
UBE2E3	10477	04120	-0.08	-0.26	-0.04	0.6	0.67	0.6	0.12	0.39	0.05	0.12	-0.16
AP2A2	161	04144|04721|04961|05016	0.01	0.05	0.21	0.22	0.22	0.22	0.05	0.22	1.25	1.39	-0.16
DBN1	1627		-0.02	0.14	0.37	0.25	0.25	0.25	0.06	0.62	2.24	3.29	-0.16
CAPRIN1	4076		0.4	-0.19	0.25	0.32	0.32	0.32	1.77	0.66	0.92	1.21	-0.14
CLIC1	1192		-0.17	-0.03	0	0.22	0.22	0.22	0.93	0.1	0	0.49	-0.16
CTTN	2017	04530|05100|05130|05131|05205	-0.05	0.34	0.09	0.23	0.23	0.23	0.2	2.27	0.41	2.86	-0.22
TIAL1	7073		0.06	0.15	0.31	0.28	0.28	0.28	0.18	0.54	1.45	1.91	-0.16
GNPNAT1	64841	00520	0.03	-0.38	-0.45	0.35	0.35	0.35	0.06	1.49	1.83	3.65	-0.16
LMNB1	4001	04210	0.26	0.34	-0.14	0.27	0.27	0.27	1.22	1.74	0.54	1.6	-0.2
RALY	22913		-0.21	0.03	-0.05	0.46	0.46	0.46	0.44	0.05	0.08	0.11	-0.16
UBE2V1	387522		0.07	0.13	0.04	0.34	0.34	0.34	0.18	0.37	0.1	0.14	-0.16
KPNA4	3840		-0.1	-0.12	0.37	0.23	0.23	0.23	0.46	0.56	2.43	2.75	-0.16
RPS2	6187	03010	0.07	0	0	0.3	0.3	0.3	0.22	0	0.01	0.03	-0.16
NUDCD1	84955		0.24	-0.01	-0.13	0.29	0.29	0.29	1.01	0.01	0.47	1.34	-0.16
BLVRB	645	00740|00860|01100	0.1	0.16	0.07	0.32	0.32	0.32	0.3	0.51	0.18	0.28	-0.16
ERP44	23071		-0.08	0.33	0.06	0.24	0.24	0.24	0.3	2.03	0.25	2.45	-0.23
TOP1	7150		0.05	-0.22	-0.05	0.32	0.32	0.32	0.12	0.79	0.12	0.69	-0.16
TCOF1	6949	03008	0.03	0	0.06	0.24	0.24	0.24	0.09	0.01	0.22	0.03	-0.16
PSMB2	5690	03050	-0.09	-0.08	0.06	0.23	0.23	0.23	0.36	0.31	0.22	0.2	-0.16
EPS8	2059		-0.04	0.01	-0.09	0.31	0.31	0.31	0.1	0.02	0.26	0.04	-0.16
H2AFY	9555	04217|05034|05322	-0.01	0.03	0.38	0.23	0.23	0.23	0.03	0.12	2.52	3.01	-0.16
TUBA1B	10376	04145|04210|04530|04540|05130	-0.09	-0.17	0.2	0.17	0.17	0.17	0.54	1.23	1.54	1.66	-0.16
GSPT1	2935	03015	0.06	-0.15	0.17	0.31	0.31	0.31	0.16	0.51	0.57	0.18	-0.16
AIFM1	9131	04210|04217	-0.16	0.05	0.04	0.36	0.36	0.36	0.46	0.11	0.08	0.3	-0.16
HNRNPU	3192	03040	0.1	0.04	0.22	0.17	0.17	0.17	0.61	0.21	1.8	1.66	-0.16
COX6C	1345	00190|01100|04260|04714|04932|05010|05012|05016	0.14	0.4	-0.1	0.46	0.46	0.46	0.29	1.08	0.19	0.51	-0.16
MRPL39	54148		-0.13	-0.47	0.1	0.64	0.64	0.64	0.19	0.89	0.14	0.39	-0.16
PFDN5	5204		-0.08	-0.05	0.15	0.2	0.2	0.2	0.4	0.23	0.92	1.01	-0.16
GNB2	2783	04014|04062|04151|04371|04713|04723|04724|04725|04726|04727|04728|04926|05032|05034|05163|05167|05170|05200	-0.11	-0.07	0.05	0.23	0.23	0.23	0.5	0.27	0.17	0.27	-0.16
NOMO3			0	-0.16	0.14	0.23	0.23	0.23	0.01	0.81	0.69	0.36	-0.16
CUTA	51596		-0.19	-0.09	0.11	0.44	0.44	0.44	0.43	0.17	0.22	0.27	-0.16
NOLC1	9221		0.38	0.16	0.07	0.34	0.34	0.34	1.5	0.48	0.17	0.91	-0.19
RPRD1B	58490		-0.22	-0.3	0.31	0.36	0.36	0.36	0.65	1.01	1.03	1.26	-0.16
SEPT7	989		0.16	0.07	0.26	0.2	0.2	0.2	0.97	0.31	1.89	1.79	-0.16
SFPQ	6421		0.16	0.32	-0.02	0.26	0.26	0.26	0.69	1.68	0.06	1.17	-0.2
EPN1	29924	04144	-0.42	-0.04	0.27	0.5	0.5	0.5	1.04	0.07	0.58	1.44	-0.16
FAM98A	25940		0.1	0	0.14	0.32	0.32	0.32	0.29	0.01	0.45	0.13	-0.16
RAB1B			-0.15	-0.02	0.18	0.16	0.16	0.16	1.2	0.09	1.56	2.86	-0.16
MTA2	9219		0.08	0.12	0.12	0.33	0.33	0.33	0.22	0.34	0.32	0.28	-0.16
EPRS	2058	00860|00970|01100	0.01	0.12	0.1	0.19	0.19	0.19	0.03	0.69	0.54	1.03	-0.16
CAD	790	00240|00250|01100	-0.1	-0.15	0.14	0.16	0.16	0.16	0.74	1.16	1.05	1.38	-0.16
CHERP	10523	03040	0.14	-0.19	0.28	0.31	0.31	0.31	0.43	0.64	1.1	0.47	-0.16
ATP5C1	509	00190|01100|04714|05010|05012|05016	-0.08	0.14	-0.13	0.19	0.19	0.19	0.39	0.82	0.73	0.39	-0.16
TIMM8A	1678		-0.04	0	0.13	0.38	0.38	0.38	0.09	0.01	0.31	0.16	-0.16
METAP2	10988		0.24	0.01	-0.48	0.57	0.57	0.57	0.42	0.01	1.02	1.39	-0.16
RPL13A	23521	03010	0.03	0.04	0.21	0.29	0.29	0.29	0.09	0.11	0.87	0.71	-0.16
REXO2	25996	03008	-0.06	0.1	0.21	0.35	0.35	0.35	0.13	0.27	0.64	0.88	-0.16
COPE	11316		-0.16	-0.17	0.26	0.16	0.16	0.16	1.31	1.49	2.5	3.37	-0.16
SERPINH1	871		-0.07	0.32	0.24	0.27	0.27	0.27	0.22	1.65	1.11	3.16	-0.22
DNAJC7	7266		0.13	0.03	0.14	0.31	0.31	0.31	0.4	0.08	0.48	0.19	-0.16
CARM1	10498	01522	-0.25	0.16	0.06	0.39	0.39	0.39	0.7	0.4	0.12	0.88	-0.16
SF3A1	10291	03040	0.14	0.31	-0.1	0.24	0.24	0.24	0.63	1.82	0.41	1.21	-0.17
TUBB4B	10383	04145|04540|05130	-0.1	-0.12	0.17	0.26	0.26	0.26	0.36	0.46	0.7	0.63	-0.16
ABI1	10006		0.03	0.02	0.15	0.34	0.34	0.34	0.08	0.05	0.45	0.2	-0.16
SF3B2	10992	03040	0.08	0.04	0.16	0.23	0.23	0.23	0.31	0.15	0.83	0.58	-0.16
LMNA	4000	04210|05410|05412|05414	-0.04	0.31	0.06	0.27	0.27	0.27	0.13	1.57	0.2	1.68	-0.18
PFDN2	5202		-0.11	0.07	0.33	0.24	0.24	0.24	0.48	0.26	2.04	3.16	-0.16
MAGT1	84061		-0.01	0.3	0.23	0.23	0.23	0.23	0.03	1.82	1.3	3.32	-0.28
UAP1	6675	00520|01100	0.32	-0.29	0.18	0.26	0.26	0.26	1.72	1.51	0.84	1.82	-0.16
LIG1	3978	03030|03410|03420|03430	-0.06	-0.53	0.79	0.59	0.59	0.59	0.08	1.11	1.9	1.5	-0.16
RSL1D1	26156		-0.04	-0.07	-0.09	0.28	0.28	0.28	0.12	0.22	0.3	0.19	-0.16
TPBG	7162		-0.05	0.02	0.44	0.34	0.34	0.34	0.11	0.05	1.84	2.16	-0.16
RPL4	6124	03010	-0.03	0.03	0.1	0.2	0.2	0.2	0.13	0.11	0.48	0.47	-0.16
AP2B1	163	04144|04721|04961|05016	-0.03	-0.13	0.11	0.2	0.2	0.2	0.14	0.71	0.58	0.35	-0.16
CARMIL1			0.14	0.11	0.31	0.49	0.49	0.49	0.26	0.19	0.7	0.5	-0.16
ELAVL1	1994	04152|04657	0.12	0.08	0.25	0.22	0.22	0.22	0.61	0.37	1.6	1.62	-0.16
SKP1	6500	04110|04114|04120|04141|04310|04350|04710|05168|05170|05200	0.15	-0.14	0.36	0.24	0.24	0.24	0.67	0.64	2.21	1.38	-0.16
ACTR2	10097	04530	-0.07	0.07	0.2	0.19	0.19	0.19	0.38	0.32	1.37	2.28	-0.16
SEC23A	10484	04141	-0.12	0.07	0.37	0.19	0.19	0.19	0.68	0.37	3.03	4.6	-0.16
VDAC3	7419	04020|04022|04216|04217|04218|04621|04979|05012|05016|05161|05166|05203	0.02	-0.17	0.14	0.19	0.19	0.19	0.08	1.07	0.85	0.52	-0.16
SEH1L	81929	03013|04150	0.18	0.03	0.01	0.41	0.41	0.41	0.43	0.05	0.01	0.11	-0.16
RAB2A	5862	04152	-0.15	-0.17	0.11	0.21	0.21	0.21	0.83	0.96	0.53	0.97	-0.16
MATR3	9782		0.16	-0.01	0.27	0.23	0.23	0.23	0.76	0.05	1.59	1.05	-0.16
PGM3	5238	00520|01100	-0.13	0.01	0.36	0.27	0.27	0.27	0.48	0.03	1.94	2.73	-0.16
VPS29	51699	04144	0.2	0.29	0.02	0.2	0.2	0.2	1.28	2.05	0.07	1.8	-0.11
PPIB	5479		-0.1	0.29	0.25	0.21	0.21	0.21	0.51	1.98	1.59	4.29	-0.16
PPP2R2A	5520	03015|04071|04151|04152|04261|04390|04530|04728|05142|05160|05165	-0.13	-0.23	0.2	0.23	0.23	0.23	0.6	1.33	1.09	1.31	-0.16
DDX6	1656	03018	0.25	-0.17	0.42	0.27	0.27	0.27	1.16	0.69	2.25	1.39	-0.16
GLRX5	51218		-0.1	0.08	0.03	0.41	0.41	0.41	0.2	0.15	0.06	0.11	-0.16
ATP6V1C1	528	00190|01100|04145|04150|04721|04966|05110|05120|05165|05323	-0.15	-0.56	0.04	0.61	0.61	0.61	0.22	1.16	0.06	0.63	-0.16
FLNC	2318	04010|04510|05132|05205	0.01	0.02	-0.01	0.25	0.25	0.25	0.04	0.08	0.02	0	-0.16
RRBP1	6238	04141	-0.09	0.29	0.08	0.21	0.21	0.21	0.39	1.94	0.39	2.67	-0.15
SNRPD1	6632	03040|05322	-0.23	-0.13	0.19	0.24	0.24	0.24	1.19	0.55	0.95	1.8	-0.16
DPYSL2	1808	04360	0.04	0.11	0.12	0.29	0.29	0.29	0.11	0.39	0.4	0.44	-0.16
MLEC	9761		-0.07	0.29	0.14	0.23	0.23	0.23	0.28	1.71	0.68	2.74	-0.2
IMPDH2	3615	00230|00983|01100	0.31	-0.14	0	0.23	0.23	0.23	1.96	0.69	0.01	2.25	-0.13
PFKP	5214	00010|00030|00051|00052|01100|01200|01230|03018|04152|04919|05230	0.05	-0.07	0.53	0.29	0.29	0.29	0.13	0.21	2.87	2.77	-0.16
SHMT2	6472	00260|00630|00670|01100|01200|01230|01523	0.03	-0.04	0.27	0.18	0.18	0.18	0.16	0.2	2.32	2.04	-0.16
ARPC2	10109	04144|04666|04810|05100|05130|05131|05132	-0.06	-0.01	0.3	0.19	0.19	0.19	0.32	0.04	2.45	3.06	-0.17
TXNDC9	10190		0.03	0.01	0.11	0.3	0.3	0.3	0.08	0.04	0.36	0.12	-0.17
NOP16	51491		0.21	-0.03	-0.14	0.36	0.36	0.36	0.64	0.07	0.38	0.87	-0.17
DDB1	1642	03420|04120|05161|05170|05203	-0.1	-0.11	0.09	0.21	0.21	0.21	0.49	0.55	0.42	0.49	-0.17
EIF4A1	1973	03013	0.13	-0.21	0.25	0.19	0.19	0.19	0.76	1.45	1.86	1.2	-0.17
ENO1	2023	00010|01100|01200|01230|03018|04066	0	0.02	-0.04	0.19	0.19	0.19	0.01	0.09	0.19	0.02	-0.17
HNRNPH2	3188		-0.1	-0.05	0.16	0.21	0.21	0.21	0.5	0.22	0.88	1.09	-0.17
PRKCSH	5589	04141	-0.04	0.27	0.3	0.22	0.22	0.22	0.15	1.73	2	4.17	-0.16
ABLIM3	22885	04360	0.46	0.21	0.03	0.85	0.85	0.85	0.62	0.25	0.03	0.24	-0.17
ABCD3	5825	02010|04146	-0.02	0.21	0.02	0.34	0.34	0.34	0.05	0.67	0.03	0.38	-0.17
ALDOA	226	00010|00030|00051|01100|01200|01230|04066	0.01	0.18	0.29	0.21	0.21	0.21	0.02	1.1	2.02	3.39	-0.17
DAP3	7818		0.03	-0.19	0.04	0.24	0.24	0.24	0.11	0.98	0.15	0.5	-0.17
UROD	7389	00860|01100	-0.25	-0.19	0.15	0.25	0.25	0.25	1.31	0.88	0.66	1.55	-0.17
ARHGEF40	55701		-0.11	0.07	0.12	0.66	0.66	0.66	0.13	0.09	0.15	0.11	-0.17
SAP18	10284	03013|03015	0	0.19	-0.1	0.39	0.39	0.39	0	0.5	0.22	0.1	-0.17
VAPB	9217	04979	0	0.27	0.11	0.24	0.24	0.24	0.01	1.52	0.43	1.86	-0.2
PRPF8	10594	03040	0.11	-0.14	0.18	0.16	0.16	0.16	0.79	1.06	1.44	0.85	-0.17
RPL18	6141	03010	-0.18	-0.39	0.07	0.45	0.45	0.45	0.38	1.07	0.13	0.54	-0.17
G6PD	2539	00030|00480|01100|01200|05230	-0.25	0.02	0.21	0.34	0.34	0.34	0.85	0.04	0.7	1.54	-0.17
NSUN2	54888		-0.06	-0.11	0.04	0.19	0.19	0.19	0.3	0.61	0.19	0.24	-0.17
TPI1	7167	00010|00051|00562|01100|01200|01230	-0.04	0	0.28	0.25	0.25	0.25	0.12	0.01	1.52	1.69	-0.17
USP10	9100		0.09	-0.26	0.24	0.28	0.28	0.28	0.29	1.21	1.04	0.65	-0.17
HARS	3035	00970	-0.04	-0.07	0.21	0.16	0.16	0.16	0.19	0.44	1.87	1.8	-0.17
SND1	27044	05169|05203	-0.05	0.08	0.18	0.16	0.16	0.16	0.27	0.47	1.49	2.48	-0.17
PDHB	5162	00010|00020|00620|01100|01200|04066|04922|05230	-0.12	0.08	0.07	0.29	0.29	0.29	0.42	0.25	0.22	0.59	-0.17
FBL	2091	03008	0.1	0.11	-0.11	0.21	0.21	0.21	0.5	0.56	0.51	0.58	-0.17
PDAP1	11333		0.35	0.37	-0.01	0.43	0.43	0.43	0.96	1.05	0.01	0.83	-0.17
HIST1H1B	3009		0.38	-0.14	0.45	0.48	0.48	0.48	0.95	0.27	1.2	0.62	-0.17
PSMD7	5713	03050|05169	0.09	-0.12	0.29	0.31	0.31	0.31	0.25	0.37	1.16	0.54	-0.17
CASP3	836	01524|04010|04115|04210|04215|04650|04657|04668|04726|04932|04933|05010|05012|05014|05016|05120|05133|05134|05145|05146|05152|05161|05163|05165|05167|05168|05170|05200|05203|05205|05206|05210|05222|05416	0.11	0.14	0.43	0.2	0.2	0.2	0.59	0.82	3.48	4.29	-0.17
DICER1	23405	05206	0.17	-0.36	0.77	1.15	0.96	1.09	0.12	0.37	0.83	0.33	-0.17
TMX3	54495		-0.04	0.26	0.22	0.2	0.2	0.2	0.16	1.89	1.52	3.8	-0.21
CNBP	7555		0.19	0.19	0.2	0.48	0.48	0.48	0.37	0.38	0.4	0.37	-0.17
TJP1	7082	04520|04530|04540|05110|05120|05132	-0.08	0.04	0.25	0.3	0.3	0.3	0.24	0.12	1.01	1.33	-0.17
TIGAR			-0.09	-0.17	0.14	0.36	0.36	0.36	0.22	0.46	0.39	0.24	-0.17
ATG3	64422	04136|04140|05167	0.13	0.09	0.3	0.26	0.26	0.26	0.51	0.31	1.56	1.54	-0.17
HSPA8	3312	03040|04010|04141|04144|04213|04612|04915|05134|05145|05162|05164|05169	0.16	-0.08	0.23	0.19	0.19	0.19	1.07	0.43	1.71	0.98	-0.17
PFN1	5216	04015|04810|05131|05132	-0.08	-0.05	0.32	0.23	0.23	0.23	0.36	0.18	2.04	2.43	-0.17
CLTC	1213	04142|04144|04721|04961|05016|05100	-0.15	-0.17	0.16	0.18	0.18	0.18	1.06	1.26	1.16	1.82	-0.17
NUCKS1	64710		0.07	0.08	0.65	0.6	0.6	0.6	0.09	0.11	1.43	1.41	-0.17
HNRNPA2B1	3181		0.23	0.16	0.12	0.22	0.22	0.22	1.38	0.82	0.58	1.14	-0.17
DHX9	1660		0.09	-0.13	0.16	0.19	0.19	0.19	0.48	0.81	1.02	0.5	-0.17
PPA1	5464	00190	0.14	0.08	-0.1	0.22	0.22	0.22	0.75	0.35	0.45	0.79	-0.17
COPS4	51138		-0.05	-0.13	0.1	0.2	0.2	0.2	0.24	0.69	0.53	0.39	-0.17
SRM	6723	00270|00330|00410|00480|01100	0.08	-0.02	0.05	0.21	0.21	0.21	0.36	0.09	0.2	0.06	-0.17
FARSA	2193	00970	-0.11	0.15	0.06	0.25	0.25	0.25	0.46	0.67	0.22	1.09	-0.17
HSPE1	3336		0.02	0.29	-0.46	0.35	0.35	0.35	0.04	0.98	1.83	1.38	-0.17
YBX1	4904		0.28	0.34	-0.04	0.49	0.49	0.49	0.63	0.8	0.06	0.48	-0.17
SRP54	6729	03060	-0.11	-0.11	0.03	0.28	0.28	0.28	0.4	0.39	0.07	0.17	-0.17
YWHAZ	7534	04110|04114|04151|04390|05130|05161|05169|05203	0	0.2	0.08	0.21	0.21	0.21	0.01	1.22	0.37	1.43	-0.17
PSMA2	5683	03050	-0.14	-0.15	0.15	0.22	0.22	0.22	0.75	0.83	0.76	1.08	-0.17
XRCC5	7520	03450	0	-0.18	0.17	0.23	0.23	0.23	0.01	0.94	0.86	0.51	-0.17
EIF4G2	1982	03013|05416	-0.05	-0.12	0.28	0.22	0.22	0.22	0.2	0.55	1.79	1.65	-0.17
CANX	821	04141|04145|04612|04918|05166	0.03	0.16	0.32	0.22	0.22	0.22	0.1	0.83	2.14	3.16	-0.17
SEPHS1	22929	00450|01100	-0.14	-0.19	0.2	0.29	0.29	0.29	0.51	0.74	0.77	0.84	-0.17
PLIN3	10226		-0.25	0.04	0.06	0.27	0.27	0.27	1.13	0.12	0.18	1.15	-0.17
PAFAH1B1	5048	00565|01100	-0.04	0.09	0.08	0.2	0.2	0.2	0.17	0.43	0.4	0.77	-0.17
PSMA1	5682	03050	0.04	0.24	0	0.28	0.28	0.28	0.12	1.07	0.01	0.63	-0.17
COX4I1	1327	00190|01100|04260|04714|04932|05010|05012|05016	0.12	0.04	0.2	0.28	0.28	0.28	0.44	0.13	0.81	0.5	-0.17
HNRNPL	3191		0.16	0.11	0.26	0.17	0.17	0.17	1.2	0.7	2.3	2.63	-0.17
FKBP3	2287		-0.14	0.25	0.19	0.18	0.18	0.18	0.9	1.95	1.36	4.35	-0.27
CD81	975	04662|05144|05160	-0.27	-0.12	-0.53	0.83	0.83	0.83	0.31	0.12	0.71	0.42	-0.17
UGGT1	56886	04141	-0.21	0.06	0.3	0.2	0.2	0.2	1.33	0.27	2.2	4.16	-0.17
NUP93	9688	03013	0.15	-0.04	0.13	0.21	0.21	0.21	0.83	0.18	0.69	0.34	-0.17
FKBP4	2288	04915	0.12	0.04	-0.01	0.25	0.25	0.25	0.48	0.12	0.02	0.15	-0.17
KTN1	3895		-0.11	0.25	0.38	0.22	0.22	0.22	0.55	1.59	2.7	5.13	-0.25
CAPNS1	826		-0.23	-0.13	0.12	0.31	0.31	0.31	0.85	0.39	0.36	0.78	-0.17
SPCS1	28972	03060	0.29	0.35	0.26	0.26	0.26	0.26	1.55	1.97	1.34	2.86	-0.22
NUP85	79902	03013	0.3	0.23	-0.24	0.43	0.43	0.43	0.83	0.58	0.6	1	-0.17
RPL6	6128	03010	0.11	0.15	0.08	0.38	0.38	0.38	0.27	0.38	0.18	0.19	-0.17
UQCRC2	7385	00190|01100|04260|04714|04932|05010|05012|05016	-0.09	-0.15	0.06	0.28	0.28	0.28	0.31	0.59	0.18	0.23	-0.17
AKR7A2	8574	00980	-0.39	-0.07	-0.01	0.41	0.41	0.41	1.22	0.13	0.02	0.73	-0.17
KANK2	25959		0.12	-0.06	0.33	0.35	0.35	0.35	0.31	0.13	1.2	0.66	-0.17
HSP90AA1	3320	04141|04151|04217|04612|04621|04657|04659|04914|04915|05200|05215|05418	0.16	0.05	0.05	0.27	0.27	0.27	0.61	0.14	0.15	0.18	-0.17
HMGB3	3149		-0.11	-0.25	0.54	0.5	0.5	0.5	0.18	0.53	1.43	1.22	-0.17
CHD4	1108	05165|05203	0.07	-0.18	0.25	0.22	0.22	0.22	0.31	1.01	1.59	0.9	-0.17
HSPA9	3313	03018|05152	0.07	0.16	-0.07	0.19	0.19	0.19	0.33	1.04	0.36	0.51	-0.17
UBA2	10054	04120	0.29	-0.19	0.28	0.24	0.24	0.24	1.69	0.95	1.67	1.31	-0.18
RPS11	6205	03010	0.21	0.04	0.17	0.26	0.26	0.26	1	0.14	0.73	0.54	-0.17
PIN1	5300	04622	0.06	0.07	0.24	0.3	0.3	0.3	0.18	0.2	0.95	0.85	-0.17
CTBP1	1487	04310|04330|05200|05220	-0.18	-0.41	0.46	0.5	0.5	0.5	0.34	1	1.19	1.08	-0.17
HEBP1	50865		-0.05	-0.01	-0.15	0.4	0.4	0.4	0.11	0.01	0.37	0.1	-0.17
MYOF	26509		-0.35	-0.1	0.13	0.34	0.34	0.34	1.35	0.27	0.37	1.35	-0.17
FABP5	2171	03320	0.11	-0.18	-0.11	0.38	0.38	0.38	0.26	0.48	0.26	0.73	-0.17
SNX3	8724	04144	-0.01	0.24	-0.04	0.19	0.19	0.19	0.05	1.79	0.18	1.23	-0.19
FLII	2314		0.02	0.11	0.14	0.24	0.24	0.24	0.06	0.47	0.6	0.82	-0.17
ARPC5	10092	04144|04666|04810|05100|05130|05131|05132	-0.08	0.07	0.2	0.22	0.22	0.22	0.35	0.3	1.15	1.92	-0.17
EIF3G	8666	03013	0.02	-0.07	0.2	0.22	0.22	0.22	0.06	0.29	1.13	0.66	-0.17
PCMT1	5110		-0.09	-0.12	0.19	0.26	0.26	0.26	0.33	0.46	0.84	0.75	-0.17
HSP90B1	7184	04141|04151|04657|04915|04918|05200|05215|05418	-0.09	0.24	0.3	0.21	0.21	0.21	0.4	1.61	2.11	4.43	-0.18
PAPSS2	9060	00230|00450|00920|01100	0.05	-0.09	0.41	0.35	0.35	0.35	0.11	0.22	1.6	1.2	-0.17
STX12	23673	04145	-0.13	0.14	0.12	0.31	0.31	0.31	0.41	0.46	0.37	1.04	-0.17
HEL-S-69			0.07	-0.06	0.1	0.19	0.19	0.19	0.33	0.31	0.56	0.15	-0.17
C1orf123	54987		0.12	0.25	0.06	0.26	0.26	0.26	0.47	1.25	0.19	0.97	-0.17
SNW1	22938	03040|04330|05169|05203	0.03	0.47	-0.27	0.45	0.45	0.45	0.06	1.37	0.66	0.67	-0.17
ECHS1	1892	00062|00071|00280|00310|00380|00410|00640|00650|01100|01200|01212	-0.07	0.02	-0.07	0.23	0.23	0.23	0.28	0.07	0.29	0.05	-0.17
RAI14	26064		-0.19	-0.09	0.3	0.21	0.21	0.21	1.14	0.42	2.09	3.14	-0.17
PARK7	11315	05012	-0.05	0.19	0.03	0.19	0.19	0.19	0.25	1.35	0.14	1.47	-0.17
EIF4E	1977	01521|03013|04066|04150|04151|04211|04910	-0.04	-0.05	0.35	0.24	0.24	0.24	0.13	0.17	2.19	2.34	-0.17
CAV1	857	04144|04510|05100|05205|05416|05418	-0.05	-0.17	-0.55	0.55	0.55	0.55	0.07	0.27	1.3	1.5	-0.17
COX5A	9377	00190|01100|04260|04714|04932|05010|05012|05016	-0.14	0.22	0	0.19	0.19	0.19	0.92	1.57	0	2.08	-0.15
S100A13	6284		-0.22	0.14	0.44	0.32	0.32	0.32	0.79	0.43	1.97	3.6	-0.17
TOMM34	10953		-0.01	-0.35	0.73	0.34	0.34	0.34	0.02	1.32	3.4	3.07	-0.18
TARS	6897	00970	-0.14	-0.21	0.33	0.18	0.18	0.18	0.9	1.65	2.85	3.33	-0.1
FAM127A			-0.13	-0.36	0.31	0.39	0.39	0.39	0.29	1.16	0.96	0.87	-0.18
EIF3J	8669	03013	-0.09	0.13	0	0.22	0.22	0.22	0.41	0.66	0.01	0.65	-0.18
RPLP2	6181	03010	-0.05	-0.06	0.22	0.22	0.22	0.22	0.21	0.25	1.24	1.17	-0.18
NEDD4	4734	04120|04144|04530|05169	-0.35	0	-0.09	0.43	0.43	0.43	0.97	0	0.18	0.42	-0.18
API5	8539		-0.01	-0.21	0.27	0.18	0.18	0.18	0.05	1.58	2.15	1.74	-0.16
PHGDH	26227	00260|01100|01200|01230	0.26	0.1	0.35	0.42	0.42	0.42	0.69	0.21	1.02	0.78	-0.18
VTA1	51534	04144	0.06	-0.04	0.36	0.33	0.33	0.33	0.16	0.09	1.47	1.1	-0.18
AP3D1	8943	04142	-0.14	-0.07	0.21	0.24	0.24	0.24	0.66	0.27	1.1	1.52	-0.18
EHD1	10938	04144	-0.14	-0.26	0.29	0.3	0.3	0.3	0.48	1.07	1.27	1.32	-0.18
FH	2271	00020|00620|01100|01200|04934|05200|05211	-0.03	-0.01	-0.12	0.22	0.22	0.22	0.13	0.03	0.6	0.29	-0.18
SF3B1	23451	03040	0.03	-0.21	0.19	0.18	0.18	0.18	0.16	1.54	1.36	0.97	-0.09
CNOT1	23019	03018	-0.03	-0.23	0.28	0.21	0.21	0.21	0.13	1.53	1.91	1.6	-0.2
STT3B	201595	00510|01100|04141	-0.18	-0.04	0.25	0.31	0.31	0.31	0.64	0.12	0.98	1.48	-0.18
PLEC	5339		-0.06	0.19	-0.24	0.24	0.24	0.24	0.22	0.91	1.27	0.66	-0.18
NF1	4763	01521|04010|04014	0.01	-0.29	0.12	0.5	0.5	0.5	0.02	0.62	0.2	0.17	-0.18
PDE12	201626		0.06	-0.25	0.28	0.19	0.19	0.19	0.31	1.92	2.16	1.58	-0.1
MTHFD2	10797	00670|01100	0.04	-0.26	0.45	0.34	0.34	0.34	0.09	0.91	1.87	1.27	-0.18
IMMT	10989		0.04	0.13	0.1	0.21	0.21	0.21	0.17	0.67	0.51	0.85	-0.18
EEF1A1	1915	03013|05134	0.13	-0.1	0.11	0.27	0.27	0.27	0.47	0.37	0.38	0.18	-0.18
PARP1	142	03410|04064|04210|04217	0.29	-0.29	0.15	0.22	0.22	0.22	1.88	1.85	0.74	2.31	-0.16
PSMA4	5685	03050	-0.19	-0.09	0.06	0.24	0.24	0.24	0.95	0.35	0.23	0.73	-0.18
COPA	1314		-0.07	-0.07	0.31	0.16	0.16	0.16	0.43	0.43	2.95	3.4	-0.18
MYO1B	4430		-0.17	-0.24	0.1	0.36	0.36	0.36	0.47	0.75	0.25	0.41	-0.18
PGK1	5230	00010|01100|01200|01230|04066	0.01	0.08	0.26	0.18	0.18	0.18	0.06	0.46	2.04	2.68	-0.18
ETFA	2108		-0.18	0.17	-0.2	0.28	0.28	0.28	0.7	0.64	0.8	0.44	-0.18
TPT1	7178		0.28	-0.37	0.36	0.24	0.24	0.24	1.55	2.28	2.21	2.05	-0.22
RPS9	6203	03010	-0.08	0.03	0.21	0.27	0.27	0.27	0.25	0.09	0.9	1.15	-0.18
MSN	4478	04530|04670|04810|05162|05205	0.15	0.19	0.29	0.25	0.25	0.25	0.62	0.88	1.58	2.17	-0.18
COL18A1	80781	04974	0.16	0.23	0.52	0.41	0.41	0.41	0.37	0.6	1.81	2.27	-0.18
IKBIP	121457		-0.04	0.25	0.17	0.33	0.33	0.33	0.11	0.9	0.53	1.44	-0.18
CNN3	1266		-0.01	0.1	0.25	0.4	0.4	0.4	0.02	0.22	0.69	0.73	-0.18
SEPT11	55752	05100	0.15	0.09	0.07	0.28	0.28	0.28	0.57	0.28	0.23	0.22	-0.18
SVIL	6840		-0.16	-0.01	0.1	0.98	0.98	0.98	0.14	0.01	0.08	0.03	-0.18
SART3	9733		-0.1	0.08	0.14	0.31	0.31	0.31	0.29	0.22	0.44	0.73	-0.18
OGT	8473	00514|04931	0.04	-0.46	0.22	0.43	0.43	0.43	0.07	1.42	0.53	0.7	-0.18
EIF3D	8664	03013	0.05	-0.16	0.22	0.2	0.2	0.2	0.23	0.97	1.52	0.86	-0.18
XPO4	64328		-0.15	-0.07	-0.07	0.49	0.49	0.49	0.29	0.12	0.11	0.04	-0.18
ANXA2	302		-0.16	-0.03	-0.16	0.27	0.27	0.27	0.68	0.1	0.67	0.38	-0.18
RPA1	6117	03030|03420|03430|03440|03460	0.26	-0.08	0.15	0.18	0.18	0.18	2.1	0.43	1.02	1.35	-0.13
CNDP2	55748	00330|00340|00410|01100	-0.11	0.18	0.1	0.24	0.24	0.24	0.44	0.84	0.39	1.56	-0.18
VPS37A	137492	04144	-0.07	0.27	0.17	0.32	0.32	0.32	0.22	1.07	0.63	1.6	-0.18
PSMC3	5702	03050|05169	0	0.05	0.07	0.17	0.17	0.17	0.02	0.24	0.44	0.41	-0.18
LAMA4	3910	04151|04510|04512|05143|05145|05146|05165|05200|05222	-0.14	0.32	0.03	0.48	0.58	0.55	0.26	0.61	0.04	0.51	-0.18
SAR1B	51128	04141|05134	0.26	0.06	0.14	0.23	0.23	0.23	1.5	0.21	0.69	0.83	-0.23
AARS	16	00970	0.05	0.14	0.1	0.26	0.26	0.26	0.18	0.58	0.36	0.56	-0.18
HNRNPC	3183	03040	0.2	0.14	0.2	0.23	0.23	0.23	1.07	0.66	1.05	1.29	-0.18
TUBA1A	7846	04145|04210|04530|04540|05130	-0.13	-0.25	0.44	0.51	0.51	0.51	0.24	0.51	1.07	0.87	-0.18
TAGLN2	8407		0.06	0.16	0.45	0.25	0.25	0.25	0.22	0.7	2.83	3.71	-0.18
PLOD1	5351	00310	-0.27	0.08	0.44	0.25	0.25	0.25	1.43	0.3	2.73	4.83	-0.18
EPS15L1	58513	04144	0.08	0.09	-0.16	0.47	0.47	0.47	0.15	0.16	0.32	0.14	-0.18
ALDH1B1	219	00010|00053|00071|00280|00310|00330|00340|00380|00410|00561|00620|01100	-0.26	-0.35	0	0.47	0.47	0.47	0.58	0.88	0.01	0.52	-0.18
FSCN1	6624	05206	-0.07	0.12	0.35	0.23	0.23	0.23	0.28	0.54	2.24	3.48	-0.18
SLC25A3	5250		0.09	0.04	-0.09	0.25	0.25	0.25	0.36	0.12	0.34	0.34	-0.18
MTAP	4507	00270|01100	0.17	0.08	0.17	0.33	0.33	0.33	0.56	0.22	0.55	0.36	-0.18
CRKL	1399	04010|04012|04015|04062|04510|04666|04722|04810|04910|05100|05131|05163|05170|05200|05206|05211|05220	0.1	0.03	0.42	0.3	0.3	0.3	0.33	0.07	2.06	1.94	-0.18
SNRPB	6628	03040|05322	0.1	-0.17	0.11	0.31	0.31	0.31	0.31	0.6	0.35	0.23	-0.18
RPS16	6217	03010	0.02	-0.25	0.11	0.2	0.2	0.2	0.09	1.76	0.56	0.99	-0.12
KIAA1468	57614		0	0.01	0.37	0.33	0.33	0.33	0	0.01	1.51	1.5	-0.18
GNAI2	2771	04015|04022|04024|04062|04071|04261|04360|04371|04540|04611|04670|04713|04723|04724|04725|04726|04727|04728|04730|04914|04915|04916|04921|04923|04924|04926|04928|04934|04971|05012|05030|05032|05034|05133|05142|05145|05163|05170|05200	-0.12	0.16	0.11	0.22	0.22	0.22	0.56	0.84	0.52	1.89	-0.18
COPG1	22820		-0.07	-0.08	0.28	0.17	0.17	0.17	0.44	0.48	2.49	2.85	-0.18
DYNC1H1	1778	04145|04962|05132	-0.19	-0.09	0.21	0.18	0.18	0.18	1.44	0.52	1.68	2.92	-0.18
MYO1C	4641		-0.17	0.01	0.01	0.2	0.2	0.2	1.05	0.05	0.06	0.79	-0.18
TMED5	50999		-0.06	-0.09	0.09	0.35	0.35	0.35	0.14	0.23	0.23	0.08	-0.18
PSME3	10197	03050|04612|05160	0.26	-0.12	0.05	0.28	0.28	0.28	1.2	0.43	0.14	0.99	-0.18
COPS2	9318		0	-0.21	0.16	0.25	0.25	0.25	0	1.09	0.76	0.52	-0.18
MAPRE1	22919		0.05	0.07	0.38	0.2	0.2	0.2	0.2	0.31	2.9	3.4	-0.18
MRPL47	57129		-0.11	-0.35	0.22	0.51	0.51	0.51	0.19	0.79	0.42	0.33	-0.18
RARS	5917	00970	0.01	0.08	0.03	0.19	0.19	0.19	0.02	0.43	0.15	0.25	-0.18
FKBP14	55033		-0.03	0.17	0.09	0.25	0.25	0.25	0.11	0.76	0.36	1.01	-0.18
HSPD1	3329	03018|04940|05134|05152	0.14	-0.15	-0.02	0.21	0.21	0.21	0.73	0.85	0.08	1.32	-0.18
TTC37	9652	03018	-0.28	-0.16	0.17	0.39	0.39	0.39	0.85	0.41	0.44	0.86	-0.18
CUL4B	8450	03420|04120|05170	0.11	-0.07	-0.01	0.45	0.45	0.45	0.22	0.12	0.02	0.07	-0.18
AIM1	202		0.17	0.23	-0.71	0.56	0.56	0.56	0.27	0.41	1.79	1.83	-0.18
CTPS1	1503	00240|01100	0.08	-0.25	0.37	0.21	0.21	0.21	0.34	1.6	2.72	1.95	-0.16
MYL6	4637	04270|04530|04921	0.11	0.09	0.79	0.25	0.25	0.25	0.42	0.33	5.19	5.87	-0.18
CTNNBL1	56259	03040	0.08	-0.07	0.05	0.24	0.24	0.24	0.29	0.29	0.17	0.1	-0.18
U2AF2	11338	03040	0.13	-0.08	0.14	0.19	0.19	0.19	0.78	0.4	0.92	0.43	-0.18
DBNL	28988		0.07	0.18	0.29	0.22	0.22	0.22	0.28	0.99	1.86	2.82	-0.18
NCLN	56926		0.02	-0.08	0.12	0.25	0.25	0.25	0.07	0.29	0.49	0.12	-0.18
REEP5	7905		-0.07	0.17	0.23	0.29	0.29	0.29	0.23	0.65	0.96	1.93	-0.18
ABCE1	6059		0.07	-0.27	0.16	0.19	0.19	0.19	0.35	2.07	1.08	1.29	-0.16
FAM3C	10447		-0.16	0.01	-0.02	0.34	0.34	0.34	0.49	0.02	0.05	0.14	-0.18
CACNA2D1	781	04010|04260|04261|04921|05410|05412|05414	-0.22	-0.07	0.42	0.24	0.24	0.24	1.17	0.29	2.75	4	-0.18
ANP32B	10541		0.08	-0.03	-0.09	0.25	0.25	0.25	0.3	0.09	0.32	0.44	-0.18
FIP1L1	81608	03015	0.12	-0.03	0.42	0.25	0.25	0.25	0.47	0.1	2.56	2.22	-0.18
ENDOD1	23052		-0.28	0.14	0.09	0.34	0.34	0.34	0.98	0.42	0.24	1.43	-0.18
GPS1	2873		0.27	0.38	-0.15	0.57	0.57	0.57	0.48	0.76	0.23	0.42	-0.18
EIF6	3692	03008	0.02	-0.27	-0.02	0.21	0.21	0.21	0.07	1.79	0.06	1.6	-0.17
LRP1	4035	04979|05010|05144	-0.07	0.27	0.09	0.31	0.31	0.31	0.2	1.08	0.25	1.31	-0.18
NCEH1	57552	04927|04934|04976|04979	-0.19	-0.33	1.04	0.55	0.55	0.55	0.34	0.65	2.98	3.21	-0.19
SRPRA			0.08	-0.04	-0.01	0.26	0.26	0.26	0.3	0.13	0.02	0.13	-0.19
NUP205	23165	03013	0.07	-0.43	0.11	0.56	0.56	0.56	0.1	0.93	0.17	0.44	-0.19
NANS	54187	00520|01100	-0.27	0.01	0.14	0.3	0.3	0.3	1.11	0.02	0.46	1.47	-0.19
CLUH	23277		0.68	0.14	-0.28	0.72	0.72	0.72	1.21	0.16	0.38	1.27	-0.19
SEC61A1	29927	03060|04141|04145|05110	0.07	0.21	-0.05	0.48	0.48	0.48	0.13	0.44	0.08	0.1	-0.19
GCSH	2653	00260|00630|01100|01200	0	0.02	-0.27	0.42	0.42	0.42	0.01	0.03	0.72	0.44	-0.19
SH3GL1	6455	04144	0.03	0	0.18	0.25	0.25	0.25	0.08	0.01	0.84	0.55	-0.19
RSU1	6251		-0.03	0.03	0.26	0.34	0.34	0.34	0.08	0.08	0.94	0.96	-0.19
LMO7	4008	04520	0.05	-0.03	0.67	0.38	0.38	0.38	0.1	0.05	2.72	2.79	-0.19
RPL10A	4736	03010	0.06	-0.12	0.37	0.27	0.27	0.27	0.21	0.46	1.99	1.41	-0.19
UPF1	5976	03013|03015	-0.05	-0.28	0.33	0.18	0.18	0.18	0.23	2.23	2.74	2.58	-0.12
RTN4	57142	05010	0.09	0.01	0.17	0.4	0.4	0.4	0.18	0.02	0.41	0.11	-0.19
ENO2	2026	00010|01100|01200|01230|03018|04066	-0.18	-0.06	1.31	0.65	0.65	0.65	0.25	0.07	3.21	3.84	-0.19
RBBP4	5928	04218	0.28	-0.03	0.32	0.3	0.3	0.3	1.2	0.07	1.43	0.92	-0.19
SLIRP	81892		0.16	0.14	0.14	0.27	0.27	0.27	0.66	0.52	0.52	0.62	-0.19
EIF5A	1984		0.24	0.03	0.13	0.19	0.19	0.19	1.83	0.14	0.81	1.05	-0.15
CYGB	114757		-0.4	-0.28	1.07	0.7	0.7	0.7	0.65	0.43	2.07	2.27	-0.19
GPI	2821	00010|00030|00500|00520|01100|01200	-0.08	-0.09	0.38	0.22	0.22	0.22	0.35	0.43	2.63	2.94	-0.19
NCKAP1	10787	04810	-0.22	0.23	0.1	0.22	0.22	0.22	1.32	1.36	0.45	3.08	-0.19
DST	667		-0.35	-0.36	0.41	0.33	0.33	0.33	1.42	1.45	1.77	2.75	-0.19
PSMA3	5684	03050	-0.09	-0.15	0.06	0.23	0.23	0.23	0.38	0.71	0.21	0.32	-0.19
CFL1	1072	04360|04666|04810|05133|05170	-0.05	0.11	0.24	0.17	0.17	0.17	0.24	0.7	2.05	3.38	-0.19
ENAH	55740	04360|04810	-0.27	0.22	0.32	0.33	0.33	0.33	0.98	0.75	1.25	3.25	-0.19
GNL3	26354	03008	0.11	-0.28	0.14	0.19	0.19	0.19	0.58	2.13	0.81	1.52	-0.15
GDI1	2664		-0.09	0	0.57	0.33	0.33	0.33	0.24	0.01	2.7	3.33	-0.19
TMX1	81542		0.04	0.06	0.07	0.18	0.18	0.18	0.17	0.3	0.36	0.29	-0.19
UBAP2L	9898		0.04	0.2	0.11	0.24	0.24	0.24	0.14	1.04	0.47	1.23	-0.19
C12orf10	60314		-0.12	-0.04	0.24	0.29	0.29	0.29	0.41	0.11	0.98	1.21	-0.19
IKBKG	8517	01523|04010|04014|04062|04064|04151|04210|04380|04620|04621|04622|04623|04625|04657|04658|04659|04660|04662|04668|04920|05120|05131|05142|05145|05160|05161|05163|05165|05166|05167|05168|05169|05170|05200|05203|05212|05215|05220|05221|05222|05340|05418	-0.13	-0.35	0.68	0.58	0.58	0.58	0.2	0.66	1.62	1.42	-0.19
ALCAM	214	04514	-0.12	-0.52	0.21	0.63	0.63	0.63	0.15	1.02	0.31	0.43	-0.19
ERP29	10961	04141	-0.12	0.09	0.3	0.23	0.23	0.23	0.54	0.41	1.86	3.19	-0.19
SNRPC	6631	03040	0.17	0.06	0.22	0.33	0.33	0.33	0.52	0.14	0.72	0.43	-0.19
EIF3H	8667	03013|05162	0.21	0.06	0.25	0.33	0.33	0.33	0.73	0.16	0.91	0.62	-0.19
HIST1H2BN	8341	05034|05203|05322	0.19	-0.28	0.27	0.23	0.23	0.23	0.99	1.69	1.61	1.31	-0.14
RPS7	6201	03010	0.02	0.05	0.08	0.23	0.23	0.23	0.05	0.2	0.35	0.24	-0.19
USO1	8615		-0.04	0.04	0.26	0.2	0.2	0.2	0.17	0.19	1.91	2.54	-0.19
TWF1	5756		0.04	-0.28	0.3	0.25	0.25	0.25	0.14	1.53	1.69	1.17	-0.2
GORASP2	26003		-0.03	0.15	0.35	0.33	0.33	0.33	0.08	0.46	1.4	2.08	-0.19
RBMX	27316	03040	0.23	0.18	0.16	0.46	0.46	0.46	0.52	0.38	0.33	0.32	-0.19
COPG2	26958		-0.17	-0.04	0.13	0.42	0.42	0.42	0.4	0.08	0.27	0.33	-0.19
PRMT5	10419	03013	0.09	-0.09	0.25	0.21	0.21	0.21	0.41	0.42	1.68	0.97	-0.19
GRPEL1	80273		0.23	-0.07	-0.07	0.2	0.2	0.2	1.58	0.31	0.3	2.08	-0.19
LRRC59	55379		0	0.05	0.04	0.19	0.19	0.19	0.01	0.27	0.2	0.2	-0.19
STK39	27347		-0.09	-0.15	0.37	0.46	0.46	0.46	0.16	0.3	0.98	0.76	-0.19
NDUFAB1	4706	00190|01100|04714|04723|04932|05010|05012|05016	0.17	0.16	0.09	0.28	0.28	0.28	0.68	0.62	0.28	0.52	-0.19
DRAP1	10589		-0.02	0.11	-0.03	0.88	0.72	0.81	0.01	0.13	0.03	0.01	-0.19
SMS	6611	00270|00330|00410|00480|01100	-0.02	0.01	0.2	0.32	0.32	0.32	0.05	0.02	0.7	0.55	-0.19
HEL-S-30			-0.25	0.02	0.39	0.21	0.21	0.21	1.62	0.08	2.84	4.85	-0.19
ERGIC1	57222		-0.02	0.12	0.15	0.23	0.23	0.23	0.06	0.52	0.76	1.26	-0.19
DPP3	10072		-0.17	-0.13	0.4	0.36	0.36	0.36	0.48	0.35	1.48	1.74	-0.19
AHSA1	10598		0.2	-0.19	0.45	0.39	0.39	0.39	0.52	0.5	1.56	0.81	-0.19
XPO1	7514	03008|03013|05164|05166|05169	0.02	-0.3	0.14	0.2	0.2	0.2	0.07	2.18	0.79	1.32	-0.11
CBS	875	00260|00270|01100|01230	-0.1	-0.01	-0.11	0.57	0.57	0.57	0.15	0.01	0.17	0.02	-0.19
ATXN2L	11273		-0.09	-0.26	0.44	0.34	0.34	0.34	0.22	0.89	1.81	1.6	-0.19
VDAC1	7416	04020|04022|04217|04218|04621|04979|05012|05016|05164|05166	0.06	-0.12	0.12	0.24	0.24	0.24	0.21	0.52	0.54	0.18	-0.19
PCYT1A	5130	00440|00564|01100|05231	-0.27	-0.11	0.08	0.21	0.21	0.21	1.85	0.57	0.4	1.84	-0.17
RAB22A	57403	04144	0.02	-0.07	0.15	0.57	0.57	0.57	0.03	0.1	0.25	0.03	-0.19
ATXN10	25814		0.15	-0.07	0.07	0.37	0.37	0.37	0.42	0.17	0.16	0.11	-0.19
IDH3A	3419	00020|01100|01200|01210|01230	0.09	-0.04	0.11	0.23	0.23	0.23	0.36	0.15	0.46	0.11	-0.19
TPP2	7174		-0.22	-0.3	0.32	0.22	0.22	0.22	1.36	2.03	2.16	3.05	-0.22
TKT	7086	00030|01100|01200|01230	-0.12	-0.1	-0.02	0.27	0.27	0.27	0.45	0.36	0.07	0.17	-0.19
SYNC	81493		0.1	0.25	0	0.35	0.35	0.35	0.25	0.85	0.01	0.41	-0.19
ARPC4	10093	04144|04666|04810|05100|05130|05131|05132	-0.29	-0.1	0.28	0.25	0.25	0.25	1.55	0.37	1.53	2.95	-0.12
CALM2	805	04014|04015|04020|04022|04024|04070|04114|04218|04261|04270|04371|04625|04713|04720|04722|04728|04740|04744|04750|04910|04912|04915|04916|04921|04922|04924|04925|04970|04971|05010|05031|05034|05133|05152|05163|05167|05170|05200|05214|05418	-0.04	0.05	0.42	0.21	0.21	0.21	0.18	0.22	3.13	4.06	-0.19
P4HA1	5033	00330|01100	-0.18	0.32	0.47	0.32	0.32	0.32	0.63	1.32	2.23	4.52	-0.19
HEXB	3074	00511|00520|00531|00603|00604|01100|04142	-0.08	0.01	0.22	0.25	0.25	0.25	0.32	0.03	1.11	1.45	-0.19
ACTN4	81	04510|04520|04530|04670|04810|05146|05203|05322	-0.18	-0.3	0.59	0.22	0.22	0.22	0.98	2.02	4.42	4.97	-0.17
NOP58	51602	03008	0.05	-0.3	0.09	0.23	0.23	0.23	0.18	1.81	0.4	1.16	-0.28
RAN	5901	03008|03013|05166|05169	0.23	-0.16	0.39	0.27	0.27	0.27	1.04	0.67	2.09	1.25	-0.19
C1QBP	708	05168	0.08	0.01	-0.06	0.25	0.25	0.25	0.29	0.03	0.23	0.22	-0.19
FERMT2	10979		0.08	-0.08	0.17	0.23	0.23	0.23	0.32	0.31	0.85	0.29	-0.19
DFFA	1676	04210	0.15	0	-0.06	0.32	0.32	0.32	0.48	0	0.16	0.33	-0.19
IGF2R	3482	04142|04144	0	-0.02	0.07	0.24	0.24	0.24	0.01	0.08	0.28	0.05	-0.19
ACOT7	11332	00062|01040	0.02	-0.3	0.63	0.24	0.24	0.24	0.05	1.78	4.34	3.96	-0.17
SUCLG2	8801	00020|00640|01100|01200	-0.17	0.03	0.14	0.3	0.3	0.3	0.59	0.08	0.45	0.93	-0.19
MTCH2	23788		0.11	-0.02	0.25	0.24	0.24	0.24	0.46	0.07	1.36	0.84	-0.19
GNA11	2767	04020|04022|04270|04540|04725|04730|04911|04912|04925|04927|04928|04934|05142|05146|05163|05170|05200	0.05	-0.03	0.06	0.26	0.26	0.26	0.18	0.09	0.19	0.02	-0.19
AHCYL1	10768	00270|01100	-0.05	0.24	-0.01	0.51	0.51	0.51	0.08	0.47	0.01	0.19	-0.19
PTRH2	51651		-0.09	-0.1	0.06	0.26	0.26	0.26	0.33	0.36	0.21	0.19	-0.19
TRIOBP	11078		0.05	0.22	0.13	0.3	0.3	0.3	0.15	0.85	0.46	0.99	-0.19
IQGAP1	8826	04520|04810|05205	-0.03	-0.01	0.35	0.23	0.23	0.23	0.11	0.02	2.23	2.53	-0.19
UBA6	55236	04120	-0.08	0.17	0.38	0.16	0.16	0.16	0.54	1.43	3.97	6.2	-0.19
SPTAN1	6709	04210	-0.15	0.08	0.43	0.25	0.25	0.25	0.64	0.29	2.66	4.07	-0.19
UBR4	23352	05165|05203	-0.22	-0.31	0.34	0.25	0.25	0.25	1.12	1.78	1.96	2.65	-0.19
HINT1	3094		0.1	-0.01	0.25	0.26	0.26	0.26	0.36	0.03	1.23	0.77	-0.19
NSF	4905	04721|04727|04962	-0.29	0.07	-0.11	0.26	0.26	0.26	1.53	0.24	0.4	0.91	-0.22
EIF4H	7458		0.07	0.15	0.19	0.25	0.25	0.25	0.25	0.66	0.9	1.29	-0.19
GLG1	2734	04514	-0.3	0.33	0.39	0.26	0.26	0.26	1.53	1.79	2.18	5.48	-0.23
MTHFD1L	25902	00670|01100	0.17	-0.25	0.53	0.29	0.29	0.29	0.61	1.04	2.85	2	-0.19
PDIA6	10130	04141	-0.23	0.22	0.07	0.21	0.21	0.21	1.43	1.37	0.33	3.01	-0.19
SEPT10	151011		-0.16	-0.02	0.44	0.4	0.4	0.4	0.4	0.05	1.5	1.96	-0.19
SMAD9	4093	04350|04550	-0.17	-0.09	-0.5	0.94	0.94	0.94	0.15	0.07	0.56	0.28	-0.2
GOLPH3	64083		-0.17	-0.12	0.15	0.22	0.22	0.22	0.91	0.59	0.79	1.3	-0.2
MYDGF	56005		-0.23	0.13	0.22	0.33	0.33	0.33	0.81	0.38	0.74	2	-0.2
FNDC3B	64778		-0.05	-0.06	0.65	0.18	0.18	0.18	0.27	0.35	5.93	6.68	-0.2
PDCD6	10016		0.05	-0.14	0.25	0.32	0.32	0.32	0.12	0.42	0.93	0.4	-0.2
ACTG1	71	04015|04145|04210|04390|04510|04520|04530|04611|04670|04714|04810|04919|04921|05100|05110|05130|05131|05132|05164|05205|05225|05410|05412|05414|05416|05418	-0.16	-0.08	0.33	0.19	0.19	0.19	0.99	0.43	2.62	3.59	-0.2
PSMB3	5691	03050	-0.22	-0.31	0.13	0.28	0.28	0.28	0.95	1.51	0.46	1.23	-0.18
EIF5	1983	03013	0.11	-0.1	0.25	0.23	0.23	0.23	0.47	0.43	1.43	0.72	-0.2
EMG1	10436	03008	0.23	-0.33	0.18	0.42	0.42	0.42	0.58	0.94	0.41	0.63	-0.2
MOGS	7841	00510|01100|04141	-0.15	0.07	0.29	0.29	0.29	0.29	0.54	0.2	1.28	2.2	-0.2
FAM120B	84498		-0.05	-0.16	0.36	0.43	0.43	0.43	0.09	0.4	1.05	0.72	-0.2
RPL13	6137	03010	0.2	0.12	0.09	0.5	0.5	0.5	0.39	0.22	0.14	0.11	-0.2
MYBBP1A	10514		0.03	-0.32	0.03	0.26	0.26	0.26	0.08	1.74	0.08	1.32	-0.19
GBF1	8729	04144	-0.11	-0.03	0.26	0.23	0.23	0.23	0.46	0.1	1.52	1.98	-0.2
SEC23B	10483	04141	0.16	-0.15	0.17	0.44	0.44	0.44	0.35	0.31	0.37	0.11	-0.2
GRN	2896		0.13	0.35	0.26	0.42	0.42	0.42	0.3	1.03	0.7	1.42	-0.2
POLR2B	5431	00230|00240|01100|03020|05016|05169	-0.03	-0.32	0.18	0.26	0.26	0.26	0.1	1.69	0.79	0.93	-0.23
MRPL28	10573	03010	0.08	-0.29	0.08	0.28	0.28	0.28	0.28	1.39	0.27	0.91	-0.2
NUP98	4928	03013|05164	-0.14	0.06	-0.2	0.33	0.33	0.33	0.44	0.15	0.67	0.21	-0.2
GMPPA	29926	00051|00520|01100	0.02	0.04	0.21	0.33	0.33	0.33	0.05	0.09	0.72	0.55	-0.2
SRRT	51593		-0.05	0.2	-0.06	0.31	0.31	0.31	0.12	0.69	0.16	0.26	-0.2
CAPZA1	829	04144	0.07	0.08	0.08	0.18	0.18	0.18	0.4	0.44	0.43	0.45	-0.2
COL2A1	1280	04151|04510|04512|04974|05165	0.36	0.6	0.46	0.64	0.64	0.64	0.59	1.19	0.83	1.65	-0.2
ALDH6A1	4329	00280|00410|00562|00640|01100|01200	-0.04	0.01	-0.01	0.44	0.44	0.44	0.08	0.01	0.02	0	-0.2
MRPL43	84545		0.14	-0.33	0.3	0.21	0.21	0.21	0.78	2.39	2.07	1.81	-0.33
NUP160	23279	03013	0.09	-0.33	0.16	0.24	0.24	0.24	0.35	2	0.79	1.27	-0.17
OGDH	4967	00020|00310|00380|01100|01200	-0.15	-0.01	-0.16	0.29	0.29	0.29	0.53	0.03	0.56	0.23	-0.2
PSMC4	5704	03050|05169	-0.03	-0.03	0.09	0.2	0.2	0.2	0.15	0.15	0.47	0.27	-0.2
HDLBP	3069		-0.01	0.13	0.2	0.17	0.17	0.17	0.05	0.88	1.6	2.79	-0.2
RPL11	6135	03010	0.06	0.16	-0.04	0.28	0.28	0.28	0.17	0.6	0.13	0.18	-0.2
TMEM214	54867		0.02	-0.12	0.25	0.23	0.23	0.23	0.05	0.54	1.49	0.97	-0.2
FAM96B	51647		-0.11	-0.08	0.24	0.27	0.27	0.27	0.42	0.28	1.14	1.29	-0.2
WBP11	51729	03040	-0.03	-0.01	-0.11	0.46	0.46	0.46	0.05	0.02	0.22	0.04	-0.2
DBI	1622	03320	-0.05	-0.41	-0.38	0.44	0.44	0.44	0.08	1.21	1.09	2.31	-0.2
AK1	203	00230|00730|01100	-0.08	0.12	0.21	0.31	0.31	0.31	0.24	0.38	0.8	1.39	-0.2
ATP6V1A	523	00190|01100|04145|04150|04721|04966|05110|05120|05165|05323	-0.2	-0.1	0.1	0.23	0.23	0.23	1.13	0.43	0.42	1.13	-0.2
ALDH18A1	5832	00330|01100|01230	-0.22	-0.04	0.19	0.26	0.26	0.26	1	0.11	0.85	1.73	-0.2
ITGB1	3688	04015|04145|04151|04360|04510|04512|04514|04530|04611|04670|04810|05100|05130|05131|05133|05140|05145|05165|05200|05205|05222|05410|05412|05414	0.07	0.18	0.59	0.25	0.25	0.25	0.25	0.83	3.73	4.81	-0.2
ARL3	403		0	-0.08	0.26	0.25	0.25	0.25	0.01	0.3	1.42	1.07	-0.2
COPS7A	50813		-0.04	-0.25	0.18	0.24	0.24	0.24	0.15	1.42	0.88	0.82	-0.2
CAPN1	823	04141|04210|04217|04218|05010	-0.12	0	0.41	0.26	0.26	0.26	0.47	0.01	2.35	3.17	-0.2
GAPDH	2597	00010|01100|01200|01230|04066|05010	-0.04	-0.13	0.47	0.16	0.16	0.16	0.23	0.98	4.9	5.18	-0.2
P3H1	64175		-0.1	0.24	0.38	0.26	0.26	0.26	0.39	1.19	2.2	4.15	-0.2
STIM1	6786	04020|04611	0.54	0.35	0.54	0.69	0.69	0.69	0.94	0.54	0.94	1.05	-0.2
ACAD9	28976		0.04	0.08	0.28	0.35	0.35	0.35	0.09	0.2	0.95	0.93	-0.2
TBCA	6902		0.17	0.23	0.22	0.33	0.33	0.33	0.54	0.8	0.75	1.14	-0.2
SH3GLB1	51100	04140|04144	-0.07	0.14	-0.15	0.31	0.31	0.31	0.19	0.44	0.52	0.14	-0.2
TARDBP	23435		0.09	0.07	0.17	0.23	0.23	0.23	0.39	0.29	0.88	0.76	-0.2
STK10	6793	04914	-0.45	-0.24	-0.07	0.45	0.45	0.45	1.28	0.56	0.14	0.77	-0.2
RPL17	6139	03010	0.1	-0.05	0.26	0.18	0.18	0.18	0.6	0.22	2.09	1.46	-0.2
ATP13A1	57130		-0.03	0.13	0.07	0.26	0.26	0.26	0.1	0.54	0.25	0.6	-0.2
S100A10	6281		-0.24	0.03	-0.2	0.34	0.34	0.34	0.8	0.06	0.64	0.32	-0.2
HIST1H3A	8350	05034|05202|05322	0.2	-0.64	0.39	0.63	0.63	0.63	0.3	1.34	0.69	0.7	-0.2
UQCRC1	7384	00190|01100|04260|04714|04932|05010|05012|05016	-0.13	0.07	-0.12	0.25	0.25	0.25	0.55	0.27	0.49	0.19	-0.2
RPN1	6184	00510|01100|04141	0.01	0.18	0.16	0.2	0.2	0.2	0.04	1.16	1.01	2.2	-0.2
BUB3	9184	04110|05166	0.28	0.39	-0.15	0.43	0.43	0.43	0.72	1.12	0.32	0.8	-0.2
FKBP11	51303		-0.23	0.51	-0.03	0.47	0.47	0.47	0.5	1.48	0.04	1.49	-0.2
CDV3	55573		0.04	0.04	0.08	0.24	0.24	0.24	0.13	0.15	0.3	0.13	-0.2
LIMS1	3987		-0.14	0.25	0.26	0.31	0.31	0.31	0.46	0.98	1	2.63	-0.2
TROVE2	6738	05322	-0.29	0.1	0.13	0.28	0.28	0.28	1.3	0.32	0.47	2.05	-0.2
TRIO	7204		-0.02	0.14	-0.55	0.76	0.76	0.76	0.01	0.15	0.84	0.47	-0.2
RPN2	6185	00510|01100|04141	-0.22	-0.33	0.24	0.24	0.24	0.24	1.13	1.96	1.3	2.12	-0.18
DCTN4	51164	04962|05016	-0.04	0.07	0.21	0.27	0.27	0.27	0.12	0.25	0.92	1.23	-0.2
CDKN2AIP	55602		0.31	-0.19	0.36	0.6	0.6	0.6	0.53	0.3	0.66	0.23	-0.2
WDR77	79084		-0.09	0.1	0.05	0.38	0.38	0.38	0.2	0.23	0.1	0.21	-0.2
DCTN1	1639	04962|05016	-0.07	-0.02	0.26	0.17	0.17	0.17	0.38	0.11	2.3	2.87	-0.2
MCM3	4172	03030|04110	0.3	-0.33	-0.03	0.28	0.28	0.28	1.46	1.63	0.07	2.82	-0.21
IPO5	3843		0.12	-0.34	0.1	0.21	0.21	0.21	0.58	2.37	0.49	1.95	-0.13
FLNA	2316	04010|04510|05132|05205	-0.02	0.14	0.44	0.22	0.22	0.22	0.08	0.7	3.19	4.47	-0.2
EIF1	10209	03013	0.05	-0.34	0.39	0.31	0.31	0.31	0.12	1.5	1.8	1.26	-0.16
ESYT1	23344		-0.14	-0.22	0.43	0.25	0.25	0.25	0.6	1.12	2.65	2.94	-0.2
TBC1D2B	23102		0.31	1.36	-0.79	1.69	1.38	1.69	0.16	1.27	0.48	0.61	-0.2
CROCC	9696		0.1	-0.16	0.23	0.37	0.37	0.37	0.26	0.47	0.73	0.26	-0.2
ARFGAP2	84364	04144	0.01	0.24	-0.06	0.56	0.56	0.56	0.01	0.42	0.08	0.08	-0.2
PTCD3	55037		-0.09	-0.35	-0.01	0.3	0.3	0.3	0.28	1.65	0.02	1.18	-0.27
MCTS1	28985		0.05	-0.43	0.5	0.43	0.43	0.43	0.08	1.28	1.55	1.03	-0.2
S100A16	140576		-0.14	0.24	0.23	0.6	0.6	0.6	0.2	0.39	0.37	0.72	-0.2
AHNAK	79026		-0.14	0	-0.32	0.36	0.36	0.36	0.36	0.01	1.11	0.67	-0.2
EFL1			-0.33	0.07	0.49	0.49	0.49	0.49	0.76	0.12	1.3	2.36	-0.2
ARMT1			-0.09	-0.35	0.27	0.31	0.31	0.31	0.28	1.55	1.11	1.12	-0.23
TLN1	7094	04015|04510|04611|05166	-0.08	0.09	0.35	0.2	0.2	0.2	0.39	0.47	2.75	4.11	-0.2
TCEAL3			0.32	0.66	-0.5	0.8	0.8	0.8	0.39	1	0.68	0.71	-0.2
PSMG2	56984		0.13	-0.41	0.13	0.46	0.46	0.46	0.26	1.13	0.25	0.66	-0.2
PSMC6	5706	03050|05169	-0.01	-0.03	0.09	0.19	0.19	0.19	0.05	0.13	0.49	0.21	-0.2
EEA1	8411	04144|04145|05152	-0.09	0.18	0.05	0.2	0.2	0.2	0.47	1.14	0.21	1.61	-0.2
PXDN	7837		0.05	0.17	0.02	0.4	0.4	0.4	0.11	0.42	0.04	0.13	-0.2
TRMT10C	54931		-0.17	0.01	-0.13	0.34	0.34	0.34	0.5	0.03	0.36	0.12	-0.2
TGFBI	7045		-0.42	0.24	0.24	0.49	0.49	0.49	1.07	0.5	0.51	2.08	-0.2
ROCK2	9475	04022|04024|04062|04071|04270|04310|04360|04510|04530|04611|04670|04810|04921|05130|05131|05132|05163|05200|05205	0.01	-0.25	0.22	0.27	0.27	0.27	0.03	1.18	0.98	0.65	-0.21
PSMD9	5715		-0.12	-0.02	0.14	0.37	0.37	0.37	0.29	0.05	0.36	0.34	-0.21
PRPF19	27339	03040|04120	0.08	-0.26	0.25	0.25	0.25	0.25	0.31	1.4	1.28	0.85	-0.21
CAMK2D	817	04012|04020|04024|04066|04114|04217|04261|04310|04360|04713|04720|04722|04725|04728|04740|04750|04911|04912|04916|04921|04922|04925|04934|04971|05031|05152|05200|05205|05214	-0.12	0.26	-0.24	0.29	0.29	0.29	0.42	1.13	1.02	0.63	-0.21
FBLIM1	54751		0	-0.05	0.43	0.47	0.47	0.47	0.01	0.08	1.15	0.93	-0.21
FTO	79068		-0.06	-0.36	0.48	0.29	0.29	0.29	0.17	1.73	2.54	2.26	-0.04
NMT1	4836		-0.11	0.08	0.05	0.24	0.24	0.24	0.45	0.3	0.17	0.6	-0.21
APEX1	328	03410	0.24	0.27	0.02	0.35	0.35	0.35	0.79	0.9	0.05	0.64	-0.21
BRIX1	55299		0.16	-0.23	0.11	0.37	0.37	0.37	0.44	0.69	0.26	0.4	-0.21
HADH	3033	00062|00071|00280|00310|00380|00650|01100|01212	-0.02	0.15	-0.47	0.38	0.38	0.38	0.04	0.39	1.72	1.31	-0.21
CLTA	1211	04142|04144|04721|04961|05016|05100	-0.31	0.05	0.12	0.23	0.23	0.23	1.9	0.19	0.54	2.64	-0.18
PPP5C	5536	04010	0.35	-0.23	0.17	0.33	0.33	0.33	1.37	0.78	0.52	1.09	-0.21
RAB5B	5869	04014|04144|04145|04962|05146|05152	-0.16	0.68	-0.46	0.81	0.81	0.81	0.17	1.03	0.6	0.44	-0.21
RPS3A	6189	03010	0.09	0.19	0.04	0.28	0.28	0.28	0.3	0.76	0.11	0.43	-0.21
TMEM43	79188		-0.04	0.07	-0.07	0.26	0.26	0.26	0.13	0.25	0.23	0.04	-0.21
ILK	3611	03320|04360|04510|05100|05213	0.02	-0.03	0.54	0.29	0.29	0.29	0.06	0.08	2.95	3.11	-0.21
MEMO1	51072		-0.02	-0.02	0.05	0.23	0.23	0.23	0.07	0.08	0.21	0.05	-0.21
SURF4	6836		-0.04	-0.37	0.31	0.29	0.29	0.29	0.12	1.85	1.42	1.32	-0.1
RPS20	6224	03010	0.35	0.15	0.2	0.43	0.43	0.43	0.99	0.33	0.46	0.53	-0.21
TST	7263	00270|00920|01100|04122	-0.11	0.13	0.12	0.38	0.38	0.38	0.27	0.34	0.3	0.65	-0.21
RANGAP1	5905	03013	0.18	-0.23	0.32	0.33	0.33	0.33	0.56	0.8	1.23	0.6	-0.21
SNX1	6642	04144	-0.15	-0.05	0.05	0.26	0.26	0.26	0.62	0.18	0.17	0.38	-0.21
CARS	833	00970	-0.1	0.02	0.23	0.26	0.26	0.26	0.37	0.06	1.1	1.55	-0.21
OAT	4942	00330|01100	0.02	-0.17	0.12	0.22	0.22	0.22	0.06	0.91	0.56	0.35	-0.21
UBE2V2	7336		0	0.19	0.15	0.35	0.35	0.35	0	0.58	0.43	0.79	-0.21
STOML2	30968		0.05	-0.02	-0.16	0.23	0.23	0.23	0.17	0.08	0.8	0.91	-0.21
DNMBP	23268		-0.14	-0.39	0.24	0.58	0.58	0.58	0.22	0.76	0.42	0.33	-0.21
RAB18	22931		0.18	-0.28	0.42	0.37	0.37	0.37	0.5	0.88	1.53	0.8	-0.21
KRT17	3872	04915	0.35	-0.06	0.04	0.82	0.82	0.82	0.43	0.05	0.04	0.13	-0.21
SH3PXD2A	9644		-0.55	0.18	-0.04	0.67	0.67	0.67	1.03	0.26	0.04	0.78	-0.21
LASP1	3927		0.07	0.5	-0.11	0.46	0.46	0.46	0.12	1.47	0.22	0.81	-0.21
IARS2	55699	00970	-0.07	-0.08	0.14	0.26	0.26	0.26	0.24	0.29	0.57	0.41	-0.21
PTPA			-0.07	-0.06	0.35	0.27	0.27	0.27	0.23	0.2	1.83	1.97	-0.21
ZYX	7791	04510	-0.08	0.05	0.15	0.36	0.36	0.36	0.2	0.12	0.4	0.46	-0.21
UQCRB	7381	00190|01100|04260|04714|04932|05010|05012|05016	-0.08	0.13	-0.05	0.25	0.25	0.25	0.29	0.51	0.18	0.22	-0.21
HINT2	84681		-0.21	-0.18	0.07	0.4	0.4	0.4	0.55	0.45	0.16	0.32	-0.21
WARS	7453	00970	-0.11	0.25	0.27	0.37	0.37	0.37	0.28	0.75	0.86	1.96	-0.21
MYL12B	103910	04510|04530|04611|04670|04810	0.02	0.08	0.74	0.21	0.21	0.21	0.07	0.34	5.7	6.69	-0.21
CHCHD2	51142		-0.06	0	0.28	0.31	0.31	0.31	0.17	0.01	1.15	1.23	-0.21
ARPC1B	10095	04144|04666|04810|05100|05130|05131|05132	-0.2	-0.11	0.36	0.28	0.28	0.28	0.83	0.38	1.85	2.57	-0.21
TPM3	7170	04260|04261|05200|05216|05410|05414	-0.04	0.12	0.23	0.19	0.19	0.19	0.16	0.71	1.68	2.85	-0.21
SCRN1	9805		-0.04	0.08	0.09	0.33	0.33	0.33	0.1	0.22	0.24	0.26	-0.21
HCFC1	3054	05168	0.12	-0.09	0.35	0.31	0.31	0.31	0.36	0.27	1.56	0.93	-0.21
EIF1AX	1964	03013	0.33	0.16	0.02	0.4	0.4	0.4	0.99	0.38	0.04	0.52	-0.21
DNAJC13	23317		-0.1	-0.37	0.21	0.28	0.28	0.28	0.34	1.84	0.88	1.19	-0.09
SRSF10	10772	03040	0.19	0.13	0.25	0.33	0.33	0.33	0.59	0.39	0.88	0.83	-0.21
USP7	7874	04068|05168|05169|05203	0	-0.18	0.16	0.23	0.23	0.23	0.01	0.89	0.81	0.45	-0.21
SQSTM1	8878	04137|04217|04218|04380|05418	-0.12	-0.01	0.04	0.43	0.43	0.43	0.25	0.02	0.07	0.07	-0.21
SBDS	51119	03008	0.01	-0.22	0.2	0.26	0.26	0.26	0.02	1	0.87	0.52	-0.21
CSE1L	1434		0.19	-0.38	0.13	0.2	0.2	0.2	1.2	2.92	0.74	2.77	-0.16
CMPK1	51727	00240|00983|01100	-0.31	-0.11	0.3	0.25	0.25	0.25	1.77	0.42	1.63	3.24	-0.28
KPNA6	23633		-0.11	-0.38	0.14	0.22	0.22	0.22	0.55	2.72	0.76	1.91	-0.15
STAT3	6774	01521|04062|04066|04068|04217|04550|04630|04659|04917|04920|04931|04933|05145|05160|05161|05162|05163|05167|05169|05200|05203|05205|05206|05212|05221|05223|05321	-0.1	-0.38	0.33	0.29	0.29	0.29	0.31	1.91	1.57	1.6	-0.09
COTL1	23406		-0.22	-0.01	-0.43	0.31	0.31	0.31	0.8	0.02	1.96	1.52	-0.21
PSMB5	5693	03050	-0.24	-0.38	0.33	0.3	0.3	0.3	0.94	1.79	1.47	2.04	-0.11
TCEB1	6921	04066|04120|05170|05200|05211	-0.12	-0.1	0.2	0.21	0.21	0.21	0.58	0.49	1.16	1.4	-0.21
CRYZ	1429		-0.15	0.16	0.29	0.43	0.43	0.43	0.34	0.35	0.78	1.46	-0.21
NDUFV1	4723	00190|01100|04714|04723|04932|05010|05012|05016	-0.01	-0.04	0.19	0.32	0.32	0.32	0.02	0.1	0.63	0.32	-0.21
MAP1B	4131		-0.25	-0.16	0.93	0.34	0.34	0.34	0.87	0.47	4.47	5.47	-0.21
ASNS	440	00250|01100	0.21	-0.04	0.42	0.5	0.5	0.5	0.42	0.06	1.05	0.54	-0.21
LRRC47	57470		0	0.13	0.16	0.22	0.22	0.22	0.01	0.66	0.84	1.47	-0.21
PLS3	5358		-0.09	-0.05	0.96	0.35	0.35	0.35	0.23	0.12	4.48	5.22	-0.21
CSNK1A1			-0.16	0.24	-0.48	0.74	0.74	0.74	0.18	0.3	0.73	0.24	-0.21
MYH10	4628	04530|04810|05132	0.2	0.21	0.55	0.4	0.4	0.4	0.52	0.55	1.98	2.33	-0.21
RAB5C	5878	04014|04144|04145|04962|05146|05152	-0.05	0.08	0.08	0.2	0.2	0.2	0.24	0.41	0.42	0.87	-0.21
ECM29			-0.03	-0.14	-0.01	0.22	0.22	0.22	0.12	0.67	0.03	0.3	-0.21
PSMD14	10213	03050|05169	0.07	0.06	0.07	0.2	0.2	0.2	0.35	0.28	0.33	0.23	-0.21
ATL3	25923		0.03	-0.07	0.13	0.22	0.22	0.22	0.09	0.27	0.6	0.17	-0.21
SDF4	51150		-0.18	0.28	0.22	0.37	0.37	0.37	0.51	0.9	0.65	2.11	-0.21
CTNNA1	1495	04390|04520|04670|05100|05200|05213|05226|05412	0.04	0	0.64	0.21	0.21	0.21	0.16	0	5.09	5.62	-0.21
DHX36	170506	03018	0.05	-0.38	0.41	0.3	0.3	0.3	0.14	1.77	1.96	1.45	-0.09
MXRA7	439921		-0.16	0.54	0.14	0.54	0.54	0.54	0.28	1.3	0.23	1.61	-0.21
TUBB3	10381	04145|04540|05130	-0.3	-0.31	0.44	0.38	0.38	0.38	0.93	0.99	1.6	2.15	-0.21
SERBP1	26135		0.21	0.18	0.04	0.35	0.35	0.35	0.67	0.54	0.1	0.37	-0.21
PRDX3	10935		-0.02	-0.01	-0.02	0.31	0.31	0.31	0.04	0.03	0.06	0	-0.21
ACSL4	2182	00061|00071|01100|01212|03320|04146|04216|04714|04920	0.03	-0.12	-0.11	0.46	0.46	0.46	0.06	0.23	0.2	0.2	-0.21
VPS26A	9559	04144	0.09	0.02	0.14	0.32	0.32	0.32	0.24	0.04	0.42	0.13	-0.21
RPS15	6209	03010	0.14	-0.16	0.37	0.27	0.27	0.27	0.52	0.63	1.94	1.15	-0.21
EZR	7430	04530|04670|04810|04971|05130|05205|05206	-0.03	-0.4	0.53	0.37	0.37	0.37	0.05	1.44	2.07	1.66	-0.21
CSPG4	1464		0.01	-0.21	0.28	0.57	0.57	0.57	0.01	0.36	0.51	0.15	-0.21
KHDRBS1	10657		-0.08	-0.07	0.38	0.18	0.18	0.18	0.46	0.38	3.37	3.97	-0.21
PGD	5226	00030|00480|01100|01200	0.08	0.43	0.12	0.45	0.45	0.45	0.14	1.23	0.24	1.1	-0.21
IGBP1	3476	04136|04140	0.3	0.19	0.67	0.53	0.53	0.53	0.66	0.36	1.68	1.57	-0.21
ACAA1	30	00071|00280|00592|01040|01100|01212|03320|04146	-0.09	0.04	0.03	0.24	0.24	0.24	0.36	0.13	0.09	0.24	-0.21
PTRF	284119		-0.17	-0.12	-0.26	0.42	0.42	0.42	0.39	0.25	0.69	0.51	-0.21
FARSB	10056	00970	0.01	-0.05	0.07	0.18	0.18	0.18	0.05	0.26	0.4	0.08	-0.21
PRPS1	5631	00030|00230|01100|01200|01230	0.31	-0.16	-0.04	0.41	0.41	0.41	0.9	0.37	0.08	1.01	-0.21
DNAJB1	3337	04141|05164	-0.17	-0.26	0.17	0.26	0.26	0.26	0.76	1.35	0.74	1.18	-0.21
COL16A1	1307		0.15	0.25	0.03	0.43	0.43	0.43	0.32	0.62	0.05	0.28	-0.21
UTP4			0.23	-0.39	0.07	0.29	0.29	0.29	0.96	1.98	0.23	2.13	-0.14
PDCD6IP	10015	04144	-0.12	-0.01	0.17	0.17	0.17	0.17	0.78	0.04	1.28	2.12	-0.21
NDUFB11	54539	00190|01100|04714|04723|04932|05010|05012|05016	0.12	0.34	-0.02	0.49	0.49	0.49	0.22	0.81	0.03	0.36	-0.21
PDLIM7	9260		-0.06	0.05	0.84	0.27	0.27	0.27	0.2	0.16	5.12	6.19	-0.21
PLBD2	196463		-0.18	0.07	-0.24	0.58	0.58	0.58	0.29	0.09	0.42	0.08	-0.21
ANXA7	310		-0.07	0.06	0.18	0.18	0.18	0.18	0.38	0.28	1.28	2.11	-0.21
VAT1	10493		-0.37	0.24	-0.16	0.38	0.38	0.38	1.26	0.73	0.41	1.02	-0.21
COPS6	10980		-0.23	-0.28	0.08	0.29	0.29	0.29	0.94	1.26	0.27	1.01	-0.21
ADAM9	8754		0.04	-0.23	0.52	0.33	0.33	0.33	0.1	0.81	2.35	1.8	-0.22
HDAC2	3066	04110|04213|04330|04919|05016|05034|05165|05169|05200|05202|05203|05220	0.12	-0.15	0.23	0.25	0.25	0.25	0.47	0.65	1.18	0.53	-0.22
ACADVL	37	00071|01100|01212	-0.01	0.03	0.71	0.31	0.31	0.31	0.02	0.06	3.72	4.33	-0.22
NIFK	84365		0.73	-0.02	-0.11	0.87	0.87	0.87	1.07	0.02	0.11	0.84	-0.22
PXN	5829	04062|04370|04510|04670|04810|05100|05163|05165|05170|05203|05205	-0.19	0.03	0.15	0.3	0.3	0.3	0.73	0.08	0.53	1.2	-0.22
NAGK	55577	00520|01100	-0.07	-0.11	0.46	0.19	0.19	0.19	0.36	0.62	3.99	4.44	-0.22
DKC1	1736	03008	-0.01	-0.01	0.14	0.21	0.21	0.21	0.03	0.03	0.76	0.54	-0.22
HIBCH	26275	00280|00410|00640|01100|01200	-0.02	0.03	-0.17	0.36	0.36	0.36	0.04	0.06	0.47	0.16	-0.22
MIA3	375056		-0.11	-0.35	0.52	0.62	0.62	0.62	0.14	0.61	1.02	0.7	-0.22
YTHDF3	253943		0.09	-0.07	0.32	0.24	0.24	0.24	0.36	0.28	1.88	1.29	-0.22
SEC22B	9554	04130|04145|05134	-0.29	0.18	0.08	0.35	0.35	0.35	1.01	0.56	0.21	1.55	-0.22
DPY30	84661		0.14	-0.4	0.89	0.61	0.61	0.61	0.2	0.75	2.14	1.49	-0.22
SNX9	51429		0.05	0.07	0.41	0.38	0.38	0.38	0.1	0.15	1.43	1.47	-0.22
MANF	7873		-0.15	0.13	0.5	0.2	0.2	0.2	0.86	0.74	4.03	6.03	-0.22
PRRC2A	7916		-0.26	0.46	-0.33	0.66	0.66	0.66	0.39	0.81	0.53	0.37	-0.22
LGALS1	3956		-0.33	-0.29	0.51	0.29	0.29	0.29	1.53	1.25	2.67	3.78	-0.18
MAP4	4134		-0.13	0.23	0.16	0.28	0.28	0.28	0.45	1	0.62	2.11	-0.22
PEA15	8682		0.18	0.03	0.37	0.27	0.27	0.27	0.78	0.1	2	1.69	-0.22
TICAM2			-0.23	-0.05	0.33	0.27	0.27	0.27	1	0.16	1.67	2.71	-0.22
CPSF7	79869	03015	0.2	0.42	-0.01	0.46	0.46	0.46	0.43	1.16	0.02	0.68	-0.22
C11orf68	83638		-0.34	-0.17	0.05	0.27	0.27	0.27	1.76	0.7	0.17	1.47	-0.16
SSRP1	6749		0.29	-0.39	0.19	0.3	0.3	0.3	1.24	1.79	0.71	1.73	-0.18
FAM21C	253725	04144	-0.16	-0.01	0.32	0.32	0.32	0.32	0.53	0.03	1.3	1.88	-0.22
PPP6C	5537		-0.21	-0.22	0.12	0.39	0.39	0.39	0.57	0.62	0.29	0.47	-0.22
TACC1	6867		0.32	0.41	-0.2	0.97	0.97	0.97	0.31	0.42	0.18	0.17	-0.22
ABHD10	55347		-0.26	-0.4	0.14	0.34	0.34	0.34	0.92	1.58	0.39	1.22	-0.16
IDE	3416	05010	-0.26	-0.2	0.56	0.41	0.41	0.41	0.71	0.51	1.98	2.52	-0.22
CSTF2	1478	03015	-0.18	-0.31	0.34	0.38	0.38	0.38	0.47	0.99	1.1	1.14	-0.22
MTX2	10651		0.11	-0.09	0.53	0.45	0.45	0.45	0.22	0.17	1.63	1.17	-0.22
MRC2	9902	04145|05152	-0.18	0	0.76	0.25	0.25	0.25	0.83	0.01	5.05	6.43	-0.22
SAMHD1	25939	05170	0.35	-0.19	0	0.43	0.43	0.43	0.98	0.43	0	0.98	-0.22
NARS	4677	00970	-0.08	0	0.13	0.29	0.29	0.29	0.24	0	0.45	0.44	-0.22
CTNNB1	1499	04015|04310|04390|04510|04520|04550|04670|04916|04919|04934|05100|05130|05163|05165|05166|05167|05200|05205|05210|05213|05215|05216|05217|05224|05225|05226|05412|05418	-0.05	0.2	0.53	0.24	0.24	0.24	0.19	1.01	3.51	5.18	-0.22
SLC39A14	23516	04216	-0.32	-0.23	0.33	0.58	0.58	0.58	0.59	0.39	0.62	0.79	-0.22
SON	6651		0.06	-0.13	0.17	0.27	0.27	0.27	0.2	0.5	0.69	0.23	-0.22
UNC45A	55898		0.07	-0.41	0.45	0.21	0.21	0.21	0.29	3.07	3.46	2.95	-0.09
NT5E	4907	00230|00240|00760|01100	-0.35	-0.03	0.21	0.51	0.51	0.51	0.8	0.04	0.42	0.97	-0.22
PARVA	55742	04510	-0.25	0	0.32	0.23	0.23	0.23	1.4	0.01	1.96	3.62	-0.22
VPS35	55737	04144	-0.1	-0.41	0.19	0.24	0.24	0.24	0.41	2.66	0.98	1.83	-0.14
PSMB6	5694	03050	-0.03	0.24	0.02	0.27	0.27	0.27	0.1	1.11	0.07	0.93	-0.22
GARS	2617	00970	-0.14	-0.04	0.27	0.24	0.24	0.24	0.61	0.12	1.5	2.11	-0.22
NACA	4666	04928	0.13	-0.41	0.16	0.28	0.28	0.28	0.46	2.21	0.64	1.6	-0.12
SEC31A	22872	04141	-0.04	0.12	0.13	0.15	0.15	0.15	0.23	0.98	1.01	2.35	-0.22
NPLOC4	55666	04141	-0.09	-0.08	0.37	0.21	0.21	0.21	0.45	0.37	2.75	3.25	-0.22
PTPN11	5781	04014|04072|04360|04625|04630|04650|04670|04722|04920|04931|05120|05168|05205|05211|05220	0.3	-0.1	0.44	0.36	0.36	0.36	1.03	0.24	1.69	1	-0.22
AAAS	8086	03013	0.05	0.06	0.12	0.33	0.33	0.33	0.12	0.14	0.34	0.16	-0.22
PLAA	9373	04141	-0.2	-0.19	0.14	0.31	0.31	0.31	0.74	0.67	0.46	0.77	-0.22
TM9SF3	56889		-0.14	-0.13	0.21	0.33	0.33	0.33	0.42	0.39	0.7	0.7	-0.22
ACACA	31	00061|00620|00640|01100|01212|04152|04910|04922	-0.02	-0.41	0.03	0.32	0.32	0.32	0.05	1.83	0.07	1.32	-0.27
U2SURP	23350	03040	0.18	0.14	0.17	0.3	0.3	0.3	0.64	0.45	0.59	0.61	-0.22
CD151	977		0.2	0.36	0.2	0.47	0.47	0.47	0.42	0.89	0.42	0.88	-0.22
ECI1	1632	00071	0.04	-0.53	0.35	0.52	0.52	0.52	0.06	1.33	0.77	0.64	-0.22
ADPGK	83440	00010|01100|01200	-0.11	-0.02	0.12	0.25	0.25	0.25	0.44	0.07	0.46	0.6	-0.22
FAM98B	283742		0.15	0.06	0.19	0.24	0.24	0.24	0.68	0.21	0.99	0.75	-0.22
NOP9	161424		-0.13	-0.38	0.08	0.82	0.89	0.82	0.13	0.43	0.07	0.1	-0.22
FKBP10	60681		-0.34	0.3	0.3	0.25	0.25	0.25	1.98	1.72	1.67	5.28	-0.2
TCEB2	6923	04066|04120|05170|05200|05211	0.06	0.14	0.34	0.27	0.27	0.27	0.19	0.57	1.82	2.4	-0.22
NRDC			0.08	-0.06	0.17	0.24	0.24	0.24	0.33	0.23	0.79	0.26	-0.22
PDCD5	9141		0.02	-0.04	0.02	0.27	0.27	0.27	0.06	0.12	0.07	0.01	-0.22
RRP9	9136		0.11	0.27	0.1	0.41	0.41	0.41	0.24	0.73	0.21	0.52	-0.22
ALYREF	10189	03013|03015|03040|05168	0.04	-0.01	0.39	0.28	0.28	0.28	0.11	0.03	2.01	1.91	-0.22
RGS10	6001		0.08	0.01	0.02	0.44	0.44	0.44	0.15	0.02	0.03	0.01	-0.22
NPEPPS	9520		-0.19	-0.16	0.28	0.32	0.32	0.32	0.67	0.52	1.09	1.4	-0.22
EIF3L	51386		0.18	-0.43	0.15	0.24	0.24	0.24	0.87	2.72	0.66	2.39	-0.12
FAM129B	64855		-0.24	-0.28	0.46	0.29	0.29	0.29	1.03	1.22	2.4	3.05	-0.22
VPS4A	27183	04144|04217	0.21	-0.22	0.29	0.24	0.24	0.24	1.07	1.2	1.73	1.13	-0.22
MME	4311	04614|04640|04974|05010	0.06	-0.22	-0.12	0.27	0.27	0.27	0.21	0.98	0.43	1.51	-0.22
TWF2	11344		-0.17	-0.19	0.48	0.26	0.26	0.26	0.75	0.88	2.9	3.45	-0.22
RPS10	6204	03010	0.02	-0.43	0.22	0.25	0.25	0.25	0.07	2.63	1.09	1.71	-0.15
NDUFA13	51079	00190|01100|04714|04723|04932|05010|05012|05016	-0.13	-0.05	0.3	0.32	0.32	0.32	0.4	0.12	1.21	1.5	-0.23
PML	5371	04120|04144|05164|05168|05200|05202|05221	-0.03	0.26	0.13	0.35	0.35	0.35	0.08	0.89	0.35	1.12	-0.23
ETHE1	23474	00920	0	-0.04	0.58	0.33	0.33	0.33	0.01	0.11	2.68	2.8	-0.23
COL6A3	1293	04151|04510|04512|04974|05165	-0.22	0.33	0.12	0.43	0.43	0.43	0.55	0.9	0.25	1.5	-0.23
LSM2	57819	03018|03040	0.15	-0.43	0.17	0.27	0.27	0.27	0.56	2.33	0.67	1.77	-0.25
TRIM25	7706	04064|04622|05164	-0.03	0.07	-0.01	0.31	0.31	0.31	0.07	0.19	0.02	0.03	-0.23
SMC4	10051		0.33	-0.43	0.41	0.32	0.32	0.32	1.36	1.9	1.84	1.66	-0.18
NUP188	23511	03013	0.11	-0.26	0.55	0.32	0.32	0.32	0.33	1	2.67	1.93	-0.23
DNAJA1	3301	04141	0.07	-0.24	0.27	0.3	0.3	0.3	0.21	0.96	1.14	0.6	-0.23
AP2S1	1175	04144|04721|04961|05016	-0.36	-0.18	0.03	0.25	0.25	0.25	2.1	0.83	0.09	1.73	-0.23
NASP	4678		0.36	-0.2	0.35	0.35	0.35	0.35	1.35	0.61	1.29	0.89	-0.23
TAX1BP3	30851		0.11	-0.12	0.57	0.3	0.3	0.3	0.38	0.38	3.07	2.65	-0.23
ASCC3	10973		0.1	-0.45	0.44	0.3	0.3	0.3	0.31	2.25	2.2	1.75	-0.32
CTSC	1075	04142|04210	0.15	-0.03	-0.14	0.37	0.37	0.37	0.41	0.07	0.36	0.57	-0.23
PPIL1	51645	03040	0.31	0.18	0.14	0.29	0.29	0.29	1.41	0.67	0.49	0.99	-0.23
UBE2L3	7332	04120|05012	0.02	-0.26	0.16	0.25	0.25	0.25	0.06	1.37	0.72	0.66	-0.23
MGA	23269		-0.19	-0.41	-0.01	0.63	0.63	0.63	0.28	0.74	0.02	0.34	-0.23
NDUFA2	4695	00190|01100|04714|04723|04932|05010|05012|05016	0	0	0.23	0.4	0.4	0.4	0.01	0	0.67	0.43	-0.23
EIF2B2	8892	03013	-0.07	0.05	0.05	0.58	0.58	0.58	0.1	0.07	0.06	0.03	-0.23
MRPS31	10240		-0.1	-0.09	0.06	0.22	0.22	0.22	0.47	0.4	0.27	0.33	-0.23
PDXK	8566	00750|01100	-0.19	0.07	0.18	0.3	0.3	0.3	0.73	0.21	0.67	1.58	-0.23
LAMC1	3915	04151|04510|04512|05020|05145|05146|05165|05200|05222	-0.38	0.02	0.12	0.27	0.27	0.27	1.99	0.06	0.45	2.47	-0.19
TXNRD1	7296	00450|05200|05225	0.17	0.24	0.07	0.37	0.37	0.37	0.47	0.71	0.17	0.46	-0.23
EHD2	30846	04144	-0.2	-0.09	-0.32	0.34	0.34	0.34	0.66	0.25	1.22	1.03	-0.23
IDH3B	3420	00020|01100|01200|01210|01230	0.2	-0.16	0.18	0.33	0.33	0.33	0.69	0.52	0.6	0.36	-0.23
SLC35A4	113829		0.03	0.1	0.32	0.61	0.61	0.61	0.03	0.13	0.54	0.4	-0.23
PTGR1	22949		-0.17	-0.46	-0.02	0.37	0.37	0.37	0.48	1.73	0.04	1.29	-0.22
HMOX2	3163	00860|01100|04978	-0.04	-0.09	0.34	0.23	0.23	0.23	0.14	0.37	2.14	2.11	-0.23
CTSA	5476	04142|04614	-0.39	-0.06	0.19	0.32	0.32	0.32	1.7	0.17	0.65	2.18	-0.19
EIF3M	10480		-0.02	-0.47	0.16	0.32	0.32	0.32	0.05	2.18	0.52	1.35	-0.19
WLS	79971		-0.04	-0.48	0.87	0.25	0.25	0.25	0.13	3	5.66	5.47	-0.07
RPL26	6154	03010	0.14	0.17	0.06	0.54	0.54	0.54	0.23	0.29	0.08	0.09	-0.23
RPS17	6218	03010	-0.02	-0.13	0.32	0.25	0.25	0.25	0.06	0.58	1.81	1.47	-0.23
AKR1A1	10327	00010|00040|00561|01100	-0.05	0	0.56	0.32	0.32	0.32	0.13	0.01	2.71	3.21	-0.23
CDK5RAP3	80279		-0.04	0.12	0.1	0.3	0.3	0.3	0.12	0.41	0.32	0.57	-0.23
HLA-C	3107	04144|04145|04218|04514|04612|04650|04940|05163|05165|05166|05167|05168|05169|05170|05203|05320|05330|05332|05416	-0.12	0.08	0.38	0.29	0.29	0.29	0.41	0.26	1.84	2.83	-0.23
LAMP2	3920	04140|04142|04145|05152	-0.15	0.15	-0.05	0.22	0.22	0.22	0.76	0.8	0.21	0.8	-0.23
BZW1	9689		0.33	-0.48	0.33	0.36	0.36	0.36	1.14	1.89	1.17	1.56	-0.16
ILVBL	10994		-0.03	-0.48	0.42	0.4	0.4	0.4	0.06	1.67	1.37	1.16	-0.24
SNX6	58533	04144	0.01	0.07	0.04	0.35	0.35	0.35	0.03	0.16	0.09	0.04	-0.23
LRRC40	55631		0.08	0.14	-0.09	0.56	0.56	0.56	0.12	0.21	0.14	0.04	-0.23
MRPL10	124995	03010	-0.29	-0.19	-0.05	0.37	0.37	0.37	0.95	0.55	0.1	0.53	-0.23
AP2M1	1173	04144|04721|04961|05016	-0.19	-0.07	0.16	0.23	0.23	0.23	1.01	0.28	0.81	1.55	-0.23
UBA5	79876		-0.12	-0.3	0.48	0.41	0.41	0.41	0.26	0.84	1.57	1.4	-0.23
PDCD11	22984		-0.35	-0.18	0.21	0.52	0.52	0.52	0.76	0.33	0.41	0.75	-0.23
UQCRFS1	7386	00190|01100|04260|04714|04932|05010|05012|05016	-0.13	-0.1	-0.03	0.28	0.28	0.28	0.49	0.36	0.07	0.19	-0.23
ACTL6A	86	04714|05225	0.23	-0.22	0.6	0.32	0.32	0.32	0.83	0.76	2.94	2.09	-0.23
MACF1	23499		-0.12	-0.06	0.5	0.22	0.22	0.22	0.55	0.27	3.72	4.55	-0.23
RAB3GAP1	22930		0.2	-0.25	0.45	0.36	0.36	0.36	0.58	0.81	1.78	0.98	-0.23
COL5A2	1290	04974	-0.28	0.82	-0.03	0.8	0.8	0.8	0.34	1.34	0.03	1.22	-0.23
ADSS	159	00230|00250|01100	-0.01	-0.13	0.18	0.23	0.23	0.23	0.04	0.6	0.92	0.51	-0.23
PDLIM4	8572		-0.24	0.47	0.2	0.44	0.44	0.44	0.57	1.43	0.46	2.43	-0.23
AP1M1	8907	04142|05170	-0.4	-0.12	0.29	0.35	0.35	0.35	1.55	0.32	1	2.35	-0.24
FLNB	2317	04010|04510|05132|05205	-0.18	0.3	0.47	0.32	0.32	0.32	0.6	1.19	2.21	4.37	-0.23
RER1	11079		0.22	0.07	0.26	0.36	0.36	0.36	0.69	0.16	0.86	0.58	-0.24
XPNPEP1	7511		-0.07	0.28	0.2	0.29	0.29	0.29	0.2	1.24	0.81	2.33	-0.24
SRP19			-0.27	-0.48	0.63	0.42	0.42	0.42	0.77	1.5	2.03	2.08	-0.14
CUL2	8453	04066|04120|05200|05211	0.06	-0.08	-0.02	0.29	0.29	0.29	0.16	0.24	0.05	0.13	-0.24
ZC3H15	55854		-0.16	-0.37	0.54	0.44	0.44	0.44	0.35	1.04	1.7	1.62	-0.24
PPP2R5C	5527	03015|04071|04114|04151|04152|04261|04728|05165	0.41	-0.72	-0.26	0.97	0.97	0.97	0.42	0.88	0.24	1.32	-0.24
PNPLA6	10908	00564	-0.3	0.09	0.24	0.34	0.34	0.34	1.08	0.22	0.82	2.22	-0.24
BCCIP	56647		0.04	-0.16	-0.12	0.34	0.34	0.34	0.09	0.48	0.35	0.66	-0.24
ARHGAP1	392		-0.07	-0.21	0.27	0.29	0.29	0.29	0.21	0.86	1.2	0.95	-0.24
CBR1	873	00590|00790|00980|01100|05204	-0.14	-0.06	0.24	0.35	0.35	0.35	0.38	0.15	0.8	0.89	-0.24
BMP2K	55589	05202	-0.07	0.8	-0.34	1.56	1.38	1.64	0.03	0.64	0.18	0.19	-0.24
ETFB	2109		-0.25	0.09	-0.05	0.33	0.33	0.33	0.9	0.26	0.14	0.54	-0.24
HOOK3	84376		-0.19	0.11	0.05	0.37	0.37	0.37	0.53	0.27	0.1	0.54	-0.24
MVP	9961		-0.42	-0.07	0.19	0.31	0.31	0.31	1.96	0.18	0.66	2.46	-0.18
TXNDC12	51060	00480	0.07	0.19	0.39	0.29	0.29	0.29	0.21	0.74	1.89	2.66	-0.24
RCN2	5955		-0.03	0.1	0.38	0.25	0.25	0.25	0.11	0.4	2.31	3.21	-0.24
NAE1	8883	05010	-0.11	0	0.17	0.42	0.42	0.42	0.25	0.01	0.42	0.39	-0.24
DLAT	1737	00010|00020|00620|01100|01200	0.14	-0.05	0.4	0.4	0.4	0.4	0.34	0.1	1.29	0.77	-0.24
FASN	2194	00061|01100|01212|04152|04910	0.11	-0.19	-0.48	0.27	0.27	0.27	0.39	0.81	2.68	4.35	-0.24
RAC1	5879	04010|04014|04015|04024|04062|04071|04145|04151|04310|04360|04370|04380|04510|04520|04530|04620|04650|04662|04664|04666|04670|04722|04810|04932|04933|04972|05014|05100|05120|05131|05132|05163|05167|05170|05200|05203|05205|05210|05211|05212|05231|05416|05418	0.06	0.13	0.12	0.26	0.26	0.26	0.19	0.54	0.48	0.64	-0.24
SPCS2	9789	03060	0.03	0.06	0.12	0.24	0.24	0.24	0.09	0.24	0.53	0.45	-0.24
GCC2	9648		-0.1	-0.04	0.04	0.33	0.33	0.33	0.29	0.09	0.1	0.09	-0.24
PAIP1	10605	03013	-0.15	-0.49	0.23	0.33	0.33	0.33	0.48	2.2	0.83	1.49	-0.1
ADI1	55256	00270|01100	-0.03	-0.07	-0.13	0.37	0.37	0.37	0.05	0.17	0.35	0.21	-0.24
NOP2	4839		-0.24	0	0.09	0.31	0.31	0.31	0.94	0.01	0.26	0.94	-0.24
SEL1L	6400	04141	-0.05	-0.18	0.58	0.63	0.63	0.63	0.06	0.29	1.19	0.89	-0.24
ACTN1	87	04510|04520|04530|04670|04810|05146|05203|05322	-0.02	0.04	0.67	0.26	0.26	0.26	0.07	0.14	4.23	5.07	-0.24
PCK2	5106	00010|00020|00620|01100|03320|04068|04151|04152|04910|04920|04922|04931|04964	0.15	0.21	0.17	0.36	0.36	0.36	0.39	0.6	0.49	0.66	-0.24
PAPSS1	9061	00230|00450|00920|01100	-0.08	-0.21	0.5	0.28	0.28	0.28	0.25	0.91	2.77	2.75	-0.24
CALD1	800	04270	-0.08	0.26	0.46	0.43	0.43	0.43	0.16	0.68	1.42	2.48	-0.24
PPA2	27068	00190	-0.46	-0.07	0.14	0.4	0.4	0.4	1.53	0.15	0.32	1.56	-0.17
NAA50	80218		0.19	0.14	0.15	0.39	0.39	0.39	0.5	0.34	0.37	0.32	-0.24
MRI1	84245	00270|01100	0	0.03	-0.05	0.65	0.65	0.65	0	0.03	0.06	0	-0.24
DNM2	1785	04072|04144|04666|04721|04961|05100	0.02	-0.26	0.55	0.31	0.31	0.31	0.04	1.01	2.73	2.28	-0.24
ENSA	2029		0.23	-0.01	0.24	0.84	0.84	0.84	0.25	0.01	0.26	0.04	-0.25
HYOU1	10525	04141	-0.03	0.15	0.58	0.27	0.27	0.27	0.09	0.61	3.5	4.74	-0.25
UQCRQ	27089	00190|01100|04260|04714|04932|05010|05012|05016	0.08	0.29	-0.12	0.37	0.37	0.37	0.22	0.96	0.32	0.43	-0.25
TUBA1C	84790	04145|04210|04530|04540|05130	-0.17	-0.29	0.09	0.34	0.34	0.34	0.52	1.06	0.23	0.6	-0.25
PGM2	55276	00010|00030|00052|00230|00500|00520|01100	-0.09	-0.13	0.51	0.28	0.28	0.28	0.29	0.5	2.88	3.12	-0.25
VAPA	9218	04979	0.22	0.25	0.34	0.32	0.32	0.32	0.8	0.91	1.42	1.97	-0.25
HMGA1	3159		-0.1	-0.01	0.09	0.6	0.6	0.6	0.14	0.01	0.13	0.05	-0.25
NUCB1	4924		-0.12	0.19	0.13	0.28	0.28	0.28	0.44	0.8	0.49	1.67	-0.25
PSMD10	5716		-0.14	-0.07	0.46	0.24	0.24	0.24	0.61	0.25	2.96	3.75	-0.25
LAMB1	3912	04151|04510|04512|05145|05146|05165|05200|05222	-0.27	-0.33	0.37	0.39	0.39	0.39	0.78	1.01	1.2	1.57	-0.25
MGEA5	10724	04931	-0.17	-0.18	0.04	0.26	0.26	0.26	0.75	0.79	0.12	0.57	-0.25
FKBP1A	2280		0.01	-0.49	0.68	0.36	0.36	0.36	0.02	1.96	2.95	2.46	-0.18
MYH9	4627	04530|04810|05132	0.05	0.07	0.83	0.23	0.23	0.23	0.18	0.26	5.79	6.64	-0.25
ATP5O	539	00190|01100|04714|05010|05012|05016	-0.23	-0.03	-0.11	0.29	0.29	0.29	0.94	0.08	0.38	0.36	-0.25
IDH2	3418	00020|00480|01100|01200|01210|01230|04146	0.19	0.16	0.29	0.3	0.3	0.3	0.7	0.58	1.28	1.47	-0.25
TMEM165	55858		0.11	-0.02	0.07	0.34	0.34	0.34	0.29	0.04	0.17	0.03	-0.25
HSPB6	126393		-0.17	0.25	-0.71	0.57	0.57	0.57	0.28	0.44	1.73	1.08	-0.25
CHMP5	51510	04144|04217	-0.26	-0.1	0.14	0.33	0.33	0.33	0.95	0.27	0.43	1	-0.25
SEC13	6396	03013|04141|04150	-0.08	0.1	0.07	0.22	0.22	0.22	0.37	0.45	0.31	0.9	-0.25
UCHL5	51377		0.1	-0.49	0.28	0.38	0.38	0.38	0.23	1.79	0.85	1.03	-0.12
ACTC1	70	04260|04261|05410|05414	-0.11	0.02	0.45	0.22	0.22	0.22	0.53	0.07	3.24	4.36	-0.25
NUCB2	4925		-0.11	0.21	0.69	0.26	0.26	0.26	0.44	0.97	4.43	6.28	-0.25
VPS28	51160	04144	-0.46	0.05	0.02	0.38	0.38	0.38	1.65	0.1	0.05	1.46	-0.25
YWHAQ	10971	04110|04114|04151|04390|05130|05161|05169|05203	0.03	0.15	-0.15	0.31	0.31	0.31	0.08	0.49	0.5	0.22	-0.25
APEH	327		-0.16	0	0.22	0.23	0.23	0.23	0.78	0.02	1.18	2.08	-0.25
MGST1	4257	00480|00980|00982|00983|01524|05200|05204|05225|05418	-0.17	-0.3	-0.9	0.51	0.51	0.51	0.32	0.65	2.75	3.49	-0.25
NPC2	10577	04142|04979	-0.37	0.03	-0.12	0.59	0.59	0.59	0.73	0.04	0.19	0.27	-0.25
NNMT	4837	00760|01100	0.43	0.22	-0.18	0.65	0.65	0.65	0.74	0.32	0.25	0.55	-0.25
SDCBP	6386		-0.47	-0.48	-0.64	0.41	0.41	0.41	1.55	1.61	2.34	3.46	-0.34
AKAP12	9590		-0.17	-0.06	-0.42	0.38	0.38	0.38	0.46	0.13	1.47	1.22	-0.25
ATP5D	513	00190|01100|04714|05010|05012|05016	0.11	0.03	0.06	0.52	0.52	0.52	0.18	0.04	0.09	0.01	-0.25
FAF2	23197		-0.08	-0.06	0.19	0.24	0.24	0.24	0.29	0.23	0.97	0.94	-0.25
ATXN2	6311		0.18	0.98	-0.33	1	1	1	0.15	1.27	0.31	0.6	-0.25
ACO2	50	00020|00630|01100|01200|01210|01230	-0.09	0.09	0.05	0.25	0.25	0.25	0.33	0.32	0.16	0.48	-0.25
DCTPP1	79077	00240|01100	-0.14	0.35	0.17	1.05	1.05	1.05	0.11	0.32	0.14	0.25	-0.25
MYH14	79784	04530|04810|05132	-0.13	0.05	0.25	0.22	0.22	0.22	0.65	0.18	1.62	2.74	-0.25
GAK	2580		-0.02	-0.34	0.17	0.33	0.33	0.33	0.05	1.37	0.54	0.66	-0.25
RNPEP	6051		-0.11	0.1	0.08	0.25	0.25	0.25	0.44	0.41	0.3	0.91	-0.25
GOLIM4	27333		0.22	0.27	0.31	0.52	0.52	0.52	0.42	0.55	0.65	0.79	-0.25
PDLIM3	27295		-0.17	0.26	0.89	0.42	0.42	0.42	0.4	0.67	3.34	4.94	-0.25
PLCB3	5331	00562|01100|04015|04020|04022|04062|04070|04071|04072|04261|04270|04310|04371|04540|04611|04621|04713|04720|04723|04724|04725|04726|04728|04730|04750|04911|04912|04915|04916|04918|04919|04921|04922|04924|04925|04926|04927|04928|04933|04934|04961|04970|04971|04972|05010|05016|05142|05143|05146|05163|05200	0.11	0.33	0.11	0.36	0.36	0.36	0.28	1.16	0.29	1.05	-0.25
HSDL2	84263		-0.23	0.06	-0.08	0.52	0.52	0.52	0.44	0.09	0.13	0.1	-0.25
TPR	7175	03013|05200|05216	0.07	-0.16	0.19	0.25	0.25	0.25	0.24	0.71	0.9	0.38	-0.25
HMGA2	8091	05202|05206	-0.34	-0.03	0.23	1.04	1.04	1.04	0.31	0.02	0.19	0.19	-0.25
LTBP1	4052	04350	-0.11	0.51	-0.2	0.64	0.64	0.64	0.14	0.97	0.29	0.43	-0.25
ASPH	444		-0.21	0.03	0.34	0.26	0.26	0.26	0.99	0.08	1.89	3.27	-0.25
COX6B1	1340	00190|01100|04260|04714|04932|05010|05012|05016	-0.15	-0.18	0.01	0.34	0.34	0.34	0.44	0.58	0.03	0.27	-0.25
PFDN1	5201		0.03	0.16	0.32	0.35	0.35	0.35	0.07	0.46	1.16	1.56	-0.25
SMARCA5	8467		-0.07	-0.5	0.41	0.25	0.25	0.25	0.26	3.14	2.42	2.65	-0.12
ANP32A	8125		-0.01	0.12	0.44	0.33	0.33	0.33	0.02	0.34	1.87	2.46	-0.25
DLST	1743	00020|00310|01100|01200	0.02	0.08	-0.03	0.22	0.22	0.22	0.05	0.34	0.13	0.05	-0.25
BOLA2			-0.04	-0.22	0.4	0.32	0.32	0.32	0.11	0.8	1.8	1.47	-0.25
SELENBP1	8991		-0.04	-0.08	-0.35	0.45	0.45	0.45	0.07	0.14	0.91	0.81	-0.25
ATP5H	10476	00190|01100|04714|05010|05012|05016	-0.05	0.17	0.14	0.23	0.23	0.23	0.2	0.88	0.65	1.71	-0.25
NFKB1	4790	01523|04010|04014|04024|04062|04064|04066|04071|04151|04210|04211|04218|04380|04620|04621|04622|04623|04625|04657|04658|04659|04660|04662|04668|04722|04917|04920|04926|04931|04932|04933|05030|05120|05131|05132|05133|05134|05140|05142|05145|05146|05152|05160|05161|05162|05163|05164|05165|05166|05167|05168|05169|05170|05200|05202|05203|05206|05212|05215|05220|05221|05222|05321|05418	0.19	0.2	0.11	0.29	0.29	0.29	0.74	0.81	0.38	0.77	-0.26
SNRPD3	6634	03040|05322	-0.21	-0.37	0.08	0.35	0.35	0.35	0.66	1.43	0.2	0.92	-0.26
DYNLL2	140735	04962	0.28	0.03	0.18	0.37	0.37	0.37	0.88	0.06	0.51	0.35	-0.26
SCRIB	23513	04390|04530|05165|05203	-0.14	-0.29	0.35	0.35	0.35	0.35	0.38	1.01	1.34	1.28	-0.26
UBE2D3	7323	04120|04141	0.15	-0.2	0.44	0.41	0.41	0.41	0.36	0.51	1.41	0.71	-0.26
IPO7	10527		0.1	-0.51	0.23	0.23	0.23	0.23	0.42	3.69	1.31	2.82	-0.13
CD2AP	23607	05100	-0.02	-0.28	0.45	0.4	0.4	0.4	0.03	0.82	1.54	1.08	-0.26
TBL3	10607	03008	0.14	-0.21	0.13	0.32	0.32	0.32	0.45	0.73	0.39	0.38	-0.26
NCAPG	64151		0.22	-0.51	0.53	0.4	0.4	0.4	0.59	1.84	1.9	1.38	-0.11
NDUFS5	4725	00190|01100|04714|04723|04932|05010|05012|05016	-0.04	-0.13	0.28	0.43	0.43	0.43	0.06	0.27	0.72	0.38	-0.26
ZC3H4	23211		0.51	0.37	0.11	1	1	1	0.53	0.35	0.08	0.21	-0.26
PYGB	5834	00500|01100|04217|04910|04922|04931	-0.56	-0.24	-0.49	0.53	0.53	0.53	1.4	0.45	1.16	1.25	-0.26
TUBB2B	347733	04145|04540|05130	-0.15	0.09	0.36	0.37	0.37	0.37	0.4	0.2	1.25	2	-0.26
SLK	9748	04114	0.1	0.04	-0.1	0.27	0.27	0.27	0.34	0.11	0.37	0.36	-0.26
ARF6	382	04014|04072|04144|04666	-0.03	0.12	-0.06	0.3	0.3	0.3	0.08	0.41	0.16	0.08	-0.26
BPNT1	10380	00920|01100	-0.25	-0.12	0.15	0.33	0.33	0.33	0.9	0.35	0.45	0.94	-0.26
CORO1B	57175		-0.16	0.15	0.19	0.2	0.2	0.2	0.92	0.84	1.19	3.22	-0.26
PLOD2	5352	00310	-0.26	-0.23	0.74	0.5	0.5	0.5	0.54	0.47	2.17	2.58	-0.26
CUL3	8452	04120|04340	0.11	0.31	0.11	0.35	0.35	0.35	0.29	1.09	0.28	0.94	-0.26
FRMD4A	55691		0.33	0.66	0.88	0.68	0.68	0.68	0.49	1.24	1.82	2.89	-0.26
CRELD2	79174		0.52	0.77	0.43	0.76	0.76	0.76	0.77	1.3	0.6	1.48	-0.26
MRPS22	56945		-0.08	-0.15	-0.16	0.31	0.31	0.31	0.22	0.49	0.52	0.64	-0.26
RBM25	58517	03040	0.11	0.23	0.12	0.25	0.25	0.25	0.47	1.17	0.51	1.27	-0.26
COPZ1	22818		0.08	0.09	0.26	0.28	0.28	0.28	0.25	0.31	1.14	1.17	-0.26
AKAP2	11217		0.28	-0.07	0.51	0.39	0.39	0.39	0.83	0.14	1.84	1.2	-0.26
CYC1	1537	00190|01100|04260|04714|04932|05010|05012|05016	-0.01	-0.07	0.09	0.27	0.27	0.27	0.04	0.22	0.31	0.07	-0.26
CYP20A1	57404		-0.04	0.4	-0.24	0.88	0.88	0.88	0.03	0.46	0.24	0.09	-0.26
IGF2BP2	10644		-0.29	0.17	-0.32	0.42	0.42	0.42	0.78	0.4	0.92	0.43	-0.26
ATP2B4	493	04020|04022|04024|04261|04925|04970|04972	0.12	-0.05	-0.18	0.32	0.32	0.32	0.36	0.12	0.59	0.9	-0.26
UBE2I	7329	03013|04064|04120|05206	0.07	-0.19	0.64	0.46	0.46	0.46	0.13	0.41	1.99	1.53	-0.26
AKT1	207	01521|01522|01524|04010|04012|04014|04015|04022|04024|04062|04066|04068|04071|04072|04140|04150|04151|04152|04210|04211|04213|04218|04261|04370|04371|04380|04510|04550|04611|04620|04625|04630|04660|04662|04664|04666|04668|04722|04725|04728|04910|04914|04915|04917|04919|04920|04922|04923|04926|04931|04932|04933|04973|05142|05145|05152|05160|05161|05162|05163|05164|05165|05166|05167|05169|05170|052…	0.12	-0.05	0.26	0.41	0.41	0.41	0.27	0.1	0.69	0.23	-0.26
ZNF638	27332		0.09	-0.43	0.88	0.63	0.63	0.63	0.12	0.78	2.03	1.43	-0.26
DYNC1LI1	51143	04145|04962|05132	-0.03	0.02	0.03	0.27	0.27	0.27	0.09	0.06	0.08	0.03	-0.26
TSC22D1	8848		-0.63	0.1	0.55	0.59	0.59	0.59	1.41	0.15	1.16	2.91	-0.26
UCHL1	7345	05012	-0.32	0.41	0.27	0.44	0.44	0.44	0.86	1.2	0.67	2.81	-0.26
TMF1	7110		0.15	0.2	0.25	0.45	0.45	0.45	0.3	0.44	0.58	0.62	-0.26
PPME1	51400		0.03	-0.13	0.44	0.29	0.29	0.29	0.08	0.47	2.31	1.93	-0.26
PMPCB	9512		0.03	-0.17	0.06	0.44	0.44	0.44	0.05	0.38	0.1	0.07	-0.26
NDUFA10	4705	00190|01100|04714|04723|04932|05010|05012|05016	-0.21	-0.01	-0.1	0.31	0.31	0.31	0.81	0.02	0.3	0.27	-0.27
POFUT1	23509	00514	-0.06	0.13	-0.06	0.29	0.29	0.29	0.16	0.44	0.17	0.12	-0.27
GOLGB1	2804		-0.45	0.16	0.21	0.46	0.46	0.46	1.25	0.32	0.46	1.97	-0.27
MAP1A	4130		-0.29	0.08	0.4	0.28	0.28	0.28	1.4	0.25	2.13	4.12	-0.27
GSTM2	2946	00480|00980|00982|00983|01524|05200|05204|05225|05418	-0.64	-0.22	-0.25	0.7	0.7	0.7	1.16	0.28	0.33	0.56	-0.27
TXNDC17	84817		-0.15	-0.11	0.45	0.32	0.32	0.32	0.45	0.32	1.99	2.36	-0.27
WASF2	10163	04520|04666|04810|05100|05131|05132|05231	-0.03	-0.07	0.22	0.36	0.36	0.36	0.07	0.17	0.68	0.38	-0.27
RPS27	6232	03010	0.61	0.17	0.19	0.79	0.79	0.79	0.92	0.18	0.21	0.37	-0.27
BTF3L4	91408		0.06	0.02	0.44	0.27	0.27	0.27	0.18	0.04	2.45	2.52	-0.27
PFKM	5213	00010|00030|00051|00052|01100|01200|01230|03018|04152|05230	-0.08	-0.52	0.11	0.41	0.41	0.41	0.17	1.82	0.23	1.12	-0.21
OPA1	4976		0.17	-0.12	0.16	0.4	0.4	0.4	0.42	0.29	0.4	0.13	-0.27
NUP155	9631	03013	-0.05	-0.53	0.06	0.32	0.32	0.32	0.13	2.49	0.15	1.89	-0.23
CLASP2	23122		0.11	-0.11	0.28	0.43	0.43	0.43	0.22	0.22	0.73	0.24	-0.27
TTYH3	80727		0.01	-0.54	0.27	0.48	0.48	0.48	0.01	1.54	0.62	0.78	-0.2
SEC24A	10802	04141	0.02	-0.56	0.56	0.44	0.44	0.44	0.03	1.78	1.77	1.39	-0.23
PROCR	10544	04610	0.24	-0.3	-0.09	0.45	0.45	0.45	0.57	0.74	0.17	1.2	-0.27
PTX3	5806		-0.01	0.63	-0.9	0.88	0.88	0.88	0.01	0.83	1.34	0.84	-0.27
SLC25A1	6576		0.22	0.56	-0.57	0.61	0.61	0.61	0.34	1.16	1.18	1.1	-0.27
RPS6KA3	6197	04010|04114|04150|04714|04720|04722|04914|04931	-0.14	0.27	0.03	0.56	0.56	0.56	0.23	0.49	0.05	0.38	-0.27
ATOX1	475	04978	0.11	0.07	0.36	0.4	0.4	0.4	0.25	0.13	1.11	0.91	-0.27
MAN2C1	4123	00511	-0.38	-0.5	0.19	0.5	0.5	0.5	0.91	1.32	0.37	1.06	-0.27
HSBP1	3281		-0.04	-0.11	0.4	0.31	0.31	0.31	0.1	0.34	1.87	1.73	-0.27
LARP4	113251		0.11	-0.2	0.16	0.35	0.35	0.35	0.3	0.62	0.46	0.23	-0.27
B4GALT1	2683	00052|00510|00514|00515|00533|00601|01100	0.1	-0.15	-0.06	0.34	0.34	0.34	0.25	0.43	0.14	0.48	-0.27
NCBP1	4686	03013|03015|03040	0.34	-0.57	0.46	0.41	0.41	0.41	1.01	1.99	1.53	1.52	-0.23
DLGAP4	22839		-0.06	0.06	0.21	0.73	0.73	0.73	0.06	0.06	0.25	0.13	-0.27
LPP	4026		-0.12	0.27	0.44	0.29	0.29	0.29	0.41	1.17	2.22	4.19	-0.27
SP100	6672	05168|05203	-0.31	0.49	-0.03	0.58	0.58	0.58	0.56	1.06	0.05	1.11	-0.27
EXOSC7	23016	03018	0.22	0.02	-0.31	0.36	0.36	0.36	0.68	0.05	1.03	1.67	-0.27
DCBLD2	131566		-0.47	0.08	0.32	0.42	0.42	0.42	1.51	0.16	0.88	2.68	-0.24
HN1	51155		0.05	-0.01	0.25	0.26	0.26	0.26	0.17	0.03	1.28	0.95	-0.28
SNAP23	8773	04130|04611	0.33	0.38	0.33	0.6	0.6	0.6	0.57	0.71	0.59	0.86	-0.28
CHCHD6	84303		-0.13	-0.14	-0.18	0.76	0.76	0.76	0.15	0.17	0.22	0.1	-0.28
ME1	4199	00620|01100|01200|03320	-0.48	-0.18	-0.31	0.33	0.33	0.33	2.19	0.58	1.23	1.72	-0.11
FKBP2	2286		-0.21	0.2	0.42	0.39	0.39	0.39	0.57	0.55	1.47	2.89	-0.28
DPYSL3	1809		-0.11	0.16	1.08	0.29	0.29	0.29	0.35	0.6	6.04	7.56	-0.28
ARFGAP1	55738	04144	-0.57	-0.19	0.27	0.49	0.49	0.49	1.63	0.37	0.59	1.9	-0.16
RALA	5898	04014|04015|04072|05200|05210|05212	-0.19	-0.58	0.72	0.32	0.32	0.32	0.65	2.84	3.66	3.88	-0.13
HAT1	8520	05034	0.3	-0.58	0.51	0.42	0.42	0.42	0.83	1.97	1.66	1.44	-0.26
HPCAL1	3241		-0.58	0.05	0.54	0.5	0.5	0.5	1.57	0.08	1.43	3.31	-0.34
ARPC3	10094	04144|04666|04810|05100|05130|05131|05132	-0.21	0.01	0.34	0.28	0.28	0.28	0.91	0.04	1.71	2.92	-0.28
SF3B6	51639	03040	-0.1	-0.25	0.13	0.32	0.32	0.32	0.29	0.92	0.41	0.45	-0.28
DNAJC8	22826		0.2	0.1	-0.24	0.37	0.37	0.37	0.56	0.25	0.72	0.94	-0.28
MYH11	4629	04270|04530	-0.36	0	-0.22	0.59	0.59	0.59	0.67	0	0.36	0.19	-0.28
PYCR1	5831	00330|01100|01230	0.06	0.36	0.18	0.64	0.64	0.64	0.07	0.61	0.25	0.5	-0.28
P4HA2	8974	00330|01100	-0.31	0.34	0.54	0.43	0.43	0.43	0.86	0.94	1.76	3.9	-0.28
SNRPA1	6627	03040	0.05	-0.04	0.08	0.28	0.28	0.28	0.16	0.11	0.28	0.03	-0.28
ABCF2	10061		0.09	-0.12	-0.06	0.46	0.46	0.46	0.17	0.25	0.11	0.21	-0.28
TBL1XR1	79718	04310	0.18	-0.07	0.02	0.3	0.3	0.3	0.67	0.2	0.05	0.39	-0.28
ASNA1	439		0.04	0.03	0.31	0.38	0.38	0.38	0.09	0.06	1	0.8	-0.28
PRDX5	25824	04146	-0.08	0.36	0.41	0.39	0.39	0.39	0.18	1.13	1.37	2.92	-0.28
PPM1F	9647		-0.22	-0.38	0.64	0.55	0.55	0.55	0.4	0.8	1.6	1.61	-0.28
SRSF11	9295		0.04	-0.08	0.29	0.38	0.38	0.38	0.08	0.18	0.9	0.46	-0.29
GOLGA3	2802		0.08	0.44	0.12	0.43	0.43	0.43	0.15	1.31	0.25	1.2	-0.29
SCCPDH	51097		0.4	0.39	0.69	0.59	0.59	0.59	0.77	0.75	1.62	2.02	-0.29
TNPO3	23534		-0.06	-0.63	0.22	0.35	0.35	0.35	0.14	2.81	0.7	1.91	-0.16
MAPK14	1432	01522|04010|04015|04068|04071|04218|04261|04370|04380|04550|04611|04620|04621|04622|04625|04657|04658|04659|04660|04664|04668|04670|04714|04722|04723|04728|04750|04912|04914|04917|04926|04933|05014|05120|05131|05132|05133|05140|05142|05145|05152|05160|05163|05164|05167|05169|05170|05205|05418	-0.23	-0.14	0.19	0.44	0.44	0.44	0.58	0.33	0.45	0.59	-0.29
ACO1	48	00020|00630|01100|01200|01210|01230	-0.18	-0.06	0.64	0.47	0.47	0.47	0.37	0.1	1.97	2.45	-0.29
POFUT2	23275	00514	-0.42	-0.02	0.25	0.45	0.45	0.45	1.2	0.03	0.58	1.68	-0.29
NXN	64359		-0.07	0.57	-1.07	0.73	0.73	0.73	0.08	0.94	2.18	1.61	-0.29
NLE1	54475		0.11	-0.63	0.11	0.41	0.41	0.41	0.27	2.06	0.26	1.61	-0.22
LMF2	91289		0.07	1.23	-0.36	1.23	1.23	1.23	0.05	1.31	0.27	0.64	-0.29
MTPAP	55149		0.11	-0.63	0.64	0.5	0.5	0.5	0.18	1.78	1.79	1.32	0.08
PPP1R8	5511		0.26	-0.27	0.57	0.73	0.73	0.73	0.34	0.35	0.93	0.34	-0.29
RAPH1	65059		0.79	0.95	0.11	1.38	1.38	1.38	0.62	0.79	0.06	0.5	-0.29
IDI1	3422	00900|01100	-0.01	-0.64	-0.25	0.42	0.42	0.42	0.02	2.24	0.63	2.88	-0.33
ITGA2	3673	04145|04151|04510|04512|04611|04640|04810|05165|05200|05205|05222|05410|05412|05414	-0.08	-0.07	1.12	0.37	0.37	0.37	0.19	0.16	5.01	5.73	-0.29
GSK3B	2932	01521|04012|04062|04110|04150|04151|04310|04340|04360|04390|04510|04550|04657|04660|04662|04722|04728|04910|04916|04917|04919|04931|04932|04934|05010|05160|05162|05163|05164|05165|05166|05167|05169|05200|05210|05213|05215|05217|05224|05225|05226	-0.15	0.28	-0.16	0.31	0.31	0.31	0.54	1.12	0.56	0.7	-0.29
SUPT5H	6829		0.17	0.44	-0.03	0.64	0.64	0.64	0.24	0.79	0.03	0.34	-0.29
FRYL	285527		-0.25	-0.36	0.28	0.34	0.34	0.34	0.87	1.38	1.02	1.52	-0.29
ANP32E	81611		0.08	-0.16	0.26	0.44	0.44	0.44	0.14	0.36	0.63	0.18	-0.3
TMED2	10959		-0.11	0.18	0.16	0.33	0.33	0.33	0.31	0.56	0.49	1.23	-0.3
UBE2A	7319	04120	0.13	-0.24	0.94	0.77	0.77	0.77	0.14	0.28	1.68	1.21	-0.3
NCAPD2	9918		0.31	-0.67	0.07	0.39	0.39	0.39	0.96	2.6	0.15	2.89	-0.28
GAMT	2593	00260|00330|01100	0.13	-0.25	0.42	0.38	0.38	0.38	0.31	0.76	1.49	0.79	-0.3
SLC7A5	8140	04150|05230	0.75	0.31	0.43	0.95	0.95	0.95	0.94	0.3	0.46	0.49	-0.3
FXR2	9513	03013	0.05	0.64	-0.22	0.6	0.6	0.6	0.07	1.43	0.35	0.72	-0.3
NBAS	51594		-0.06	-0.12	0.15	0.37	0.37	0.37	0.13	0.31	0.39	0.16	-0.3
IFIT5	24138		-0.11	-0.67	0.13	0.42	0.42	0.42	0.24	2.37	0.28	1.64	-0.22
FADS2	9415	00592|01040|01212|03320	0.38	-0.68	-0.63	0.61	0.61	0.61	0.7	1.5	1.35	3.79	-0.32
AHNAK2	113146		-0.21	0.19	-0.1	0.38	0.38	0.38	0.59	0.51	0.23	0.39	-0.31
COL6A2	1292	04151|04510|04512|04974|05165	-0.22	0.37	0.16	0.79	0.79	0.79	0.25	0.48	0.17	0.57	-0.31
PRRC1	133619		-0.3	-0.12	0.31	0.3	0.3	0.3	1.32	0.38	1.36	2.51	-0.31
HSPG2	3339	04512|05161|05205	-0.34	-0.12	0.23	0.84	0.84	0.84	0.39	0.12	0.24	0.28	-0.31
OVCA2	1801		-0.08	-0.24	0.21	0.57	0.57	0.57	0.12	0.44	0.39	0.18	-0.31
C11orf58	10944		-0.28	0.18	0.19	0.6	0.6	0.6	0.46	0.28	0.29	0.78	-0.31
EIF4EBP1	1978	01521|03013|04012|04066|04150|04151|04152|04211|04218|04910|05163|05165|05221|05231	0.03	0.02	0.18	0.35	0.35	0.35	0.06	0.04	0.57	0.3	-0.31
INTS3	65123		0.26	0.09	0.06	0.69	0.69	0.69	0.36	0.11	0.06	0.06	-0.31
IGF2BP3	10643		-0.67	-0.33	0.47	0.52	0.52	0.52	1.82	0.71	1.14	2.62	-0.21
STAM2	10254	04144|04630	-0.02	0.4	-0.12	0.41	0.41	0.41	0.04	1.29	0.27	0.66	-0.31
TCEAL4	79921		0.04	0.05	-0.23	0.77	0.77	0.77	0.04	0.05	0.28	0.07	-0.31
USP15	9958	04137	0.24	-0.03	0.35	0.42	0.42	0.42	0.61	0.05	0.99	0.49	-0.31
TUBB4A	10382	04145|04540|05130	0.39	-0.16	0.76	0.72	0.72	0.72	0.58	0.19	1.39	0.75	-0.31
ME2	4200	00620|01200	0.32	-0.12	0.44	0.41	0.41	0.41	0.96	0.27	1.46	0.8	-0.31
MAP1S	55201		0.03	-0.12	0.62	0.36	0.36	0.36	0.07	0.3	2.62	2.44	-0.31
UACA	55075		0.21	0.11	-0.13	0.43	0.43	0.43	0.51	0.23	0.28	0.38	-0.31
SMC1A	8243	04110|04114	0.48	-0.14	0.45	0.47	0.47	0.47	1.34	0.26	1.22	0.79	-0.31
MTPN	136319		-0.41	-0.19	0.36	0.41	0.41	0.41	1.31	0.47	1.09	2.13	-0.32
UFM1	51569		0.02	0.01	0.43	0.42	0.42	0.42	0.04	0.02	1.36	1.25	-0.32
NQO1	1728	00130|05200|05225|05418	-0.83	-0.85	0.67	0.88	0.88	0.88	1.2	1.24	0.9	1.7	-0.32
DPM1	8813	00510|01100	-0.2	-0.7	0.39	0.51	0.51	0.51	0.38	2	0.9	1.32	-0.04
WDFY1	57590		0.31	0.37	0.47	0.63	0.63	0.63	0.52	0.64	0.89	1.13	-0.32
NUP37	79023	03013	0.36	0.01	-0.24	0.52	0.52	0.52	0.79	0.01	0.48	1.09	-0.32
SH3KBP1	30011	04144	-0.34	0.22	0.25	0.51	0.51	0.51	0.75	0.42	0.52	1.64	-0.32
SERPINB6	5269	05146	-0.47	-0.02	0.79	0.7	0.7	0.7	0.77	0.02	1.52	2.46	-0.32
NID2	22795		-0.05	-0.17	-0.04	0.61	0.61	0.61	0.07	0.25	0.05	0.05	-0.32
IPO11	51194		-0.01	-0.72	0.23	0.47	0.47	0.47	0.01	2.3	0.5	1.49	-0.21
LXN	56925		-0.4	0.62	0.88	0.6	0.6	0.6	0.76	1.37	2.16	4.6	-0.32
LTBP2	4053		0.37	0.29	0.7	1.08	1.08	1.08	0.33	0.24	0.73	0.55	-0.32
LUC7L3	51747		0.02	-0.07	-0.05	0.25	0.25	0.25	0.07	0.26	0.16	0.19	-0.32
AKR1C1	1645	00140|00980	0.56	0.52	-0.28	0.8	0.8	0.8	0.81	0.73	0.32	0.72	-0.33
GPKOW	27238		-0.02	0.05	0.12	0.34	0.34	0.34	0.05	0.13	0.34	0.25	-0.33
SCOC	60592		-0.2	-0.17	0.36	0.42	0.42	0.42	0.49	0.39	1.04	1.18	-0.33
YAP1	10413	04390|04392	0.03	-0.15	0.3	0.33	0.33	0.33	0.07	0.48	1.18	0.65	-0.33
CEP170	9859		-0.2	0.39	0.42	0.49	0.49	0.49	0.39	0.95	1.06	2.59	-0.33
ISOC1	51015		-0.16	-0.74	0.61	0.41	0.41	0.41	0.36	2.79	2.16	2.4	-0.19
STOM	2040		0.13	-0.18	-0.45	0.55	0.55	0.55	0.21	0.31	1	1.53	-0.33
MARCKS	4082	04666|05206	0.02	0.39	0.92	0.54	0.54	0.54	0.03	0.84	2.63	3.83	-0.33
STRN	6801		-0.18	-0.32	0.25	0.48	0.48	0.48	0.36	0.76	0.53	0.51	-0.33
CUL4A	8451	03420|04120|05170	0.08	-0.34	0.59	0.8	0.8	0.8	0.08	0.42	0.87	0.37	-0.33
DNAJB11	51726	04141	-0.1	0.13	0.22	0.4	0.4	0.4	0.21	0.3	0.56	0.91	-0.33
PPP3CA	5530	04010|04020|04022|04114|04218|04310|04360|04370|04380|04625|04650|04658|04659|04660|04662|04720|04724|04728|04921|04922|04924|05010|05014|05031|05152|05163|05166|05167|05170	-0.12	0.07	0.15	0.44	0.44	0.44	0.25	0.12	0.32	0.4	-0.33
GIGYF2	26058		0.15	-0.1	-0.29	0.58	0.58	0.58	0.23	0.15	0.53	0.7	-0.33
SRPK1	6732	05168	-0.05	-0.77	0.25	0.41	0.41	0.41	0.09	2.95	0.68	2.05	-0.29
HEL-S-277			-0.12	-0.08	0.73	0.54	0.54	0.54	0.2	0.12	1.94	2.16	-0.33
FAH	2184	00350|01100	-0.47	0.19	-0.42	0.71	0.71	0.71	0.75	0.24	0.63	0.3	-0.33
ARF5	381	04144	0.15	-0.31	0.54	0.79	0.79	0.79	0.16	0.37	0.79	0.28	-0.33
NT5DC2	64943		-0.2	-0.38	0.44	0.41	0.41	0.41	0.52	1.19	1.43	1.52	-0.33
HLA-B	3106	04144|04145|04218|04514|04612|04650|04940|05163|05165|05166|05167|05168|05169|05170|05203|05320|05330|05332|05416	-0.62	-0.31	0.17	0.77	0.77	0.77	0.98	0.39	0.19	0.71	-0.34
PDLIM1	9124		-0.24	-0.18	1.11	0.56	0.56	0.56	0.43	0.29	3.1	3.69	-0.34
RAD23A	5886	03420|04141	-0.1	0.18	0.1	0.33	0.33	0.33	0.27	0.6	0.29	0.91	-0.34
RAC2	5880	04010|04014|04015|04024|04062|04071|04310|04360|04370|04510|04520|04650|04662|04664|04666|04670|04810|05163|05170|05200|05210|05212|05231|05416|05418	-0.67	0.4	0.7	0.48	0.48	0.48	2.02	1.02	2.16	5.28	-0.31
HK2	3099	00010|00051|00052|00500|00520|00524|01100|01200|04066|04910|04930|04973|05230	0.22	-0.82	0.66	0.4	0.4	0.4	0.58	3.23	2.51	2.47	-0.36
FYCO1	79443		-0.23	0.16	0.01	0.54	0.54	0.54	0.42	0.27	0.01	0.3	-0.34
COASY	80347	00770|01100	0.02	-0.24	-0.06	0.52	0.52	0.52	0.03	0.47	0.09	0.25	-0.34
MMP2	4313	01522|04670|04912|04915|04926|04933|05200|05205|05219|05418	-0.12	0.04	0.27	0.67	0.67	0.67	0.15	0.04	0.4	0.32	-0.35
CYB5A	1528		0.15	0.15	-0.67	0.58	0.58	0.58	0.22	0.22	1.56	1.61	-0.35
RMDN1	51115		-0.39	-0.14	-0.59	0.68	0.68	0.68	0.67	0.19	1.09	0.81	-0.35
ECHDC1	55862	00640	0.01	-0.06	-0.22	0.33	0.33	0.33	0.03	0.15	0.76	0.76	-0.35
THY1	7070	04670	-0.08	0.55	0.04	0.93	0.93	0.93	0.07	0.65	0.03	0.37	-0.35
TPM2	7169	04260|04261|05410|05414	-0.07	0.4	0.69	0.46	0.46	0.46	0.11	1.05	2.17	3.71	-0.35
ZC3H14	79882		0.61	0.44	-0.24	0.9	0.9	0.9	0.76	0.5	0.24	0.56	-0.35
ZMYND8	23613		-0.42	0.35	-0.27	0.67	0.67	0.67	0.68	0.55	0.39	0.41	-0.35
RAB8B	51762	04530	0.32	0.85	-1.2	0.91	0.91	0.91	0.34	1.19	1.88	1.79	-0.35
CHCHD3	54927		-0.17	0.79	-0.47	0.75	0.75	0.75	0.19	1.38	0.69	0.69	-0.36
RAB3B	5865		0.24	-0.14	0.73	0.56	0.56	0.56	0.42	0.23	1.87	1.28	-0.36
SCAMP3	10067		-0.3	-0.59	0.08	0.54	0.54	0.54	0.63	1.46	0.13	0.96	-0.36
SNRPE	6635	03040	0.11	-0.83	0.21	0.4	0.4	0.4	0.24	3.24	0.53	2.61	-0.25
TOP2A	7153	01524	0.73	-0.91	0.45	0.68	0.68	0.68	1.43	1.91	0.74	1.98	-0.27
PTK2	5747	01522|04012|04062|04151|04360|04370|04510|04670|04810|05100|05146|05163|05165|05170|05200|05202|05205|05222|05418	-0.31	-0.13	0.34	0.43	0.43	0.43	0.86	0.27	0.97	1.58	-0.36
PPT1	5538	00062|01100|01212|04142	-0.11	-0.05	-0.12	0.51	0.51	0.51	0.18	0.08	0.21	0.04	-0.36
IMPA1	3612	00562|01100|04070	-0.19	0.23	0.19	0.71	0.71	0.71	0.26	0.32	0.26	0.51	-0.37
CRIP2	1397		-0.34	0.15	1.49	0.58	0.58	0.58	0.63	0.22	4.23	5.67	-0.37
MYO9B	4650		-0.11	0.05	0.24	0.54	0.54	0.54	0.17	0.07	0.45	0.44	-0.37
HMGN2	3151		0.79	0.7	0.19	1.22	1.22	1.22	0.73	0.62	0.13	0.45	-0.37
H2AFZ	3015	04217|05034|05322	0.05	-0.23	0.27	0.55	0.55	0.55	0.07	0.41	0.49	0.13	-0.37
ALDH3A2	224	00010|00053|00071|00280|00310|00330|00340|00380|00410|00561|00620|01100	-0.36	-0.49	0.45	0.94	0.94	0.94	0.37	0.55	0.5	0.45	-0.37
ZNF185	7739		-0.66	-1.01	1.57	0.86	0.86	0.86	0.91	1.6	2.83	3.33	-0.62
NDUFS3	4722	00190|01100|04714|04723|04932|05010|05012|05016	-0.08	-0.3	0.08	0.48	0.48	0.48	0.15	0.69	0.15	0.22	-0.37
LYPLA2	11313	00564	-0.29	-0.13	0.46	0.38	0.38	0.38	0.91	0.33	1.68	2.49	-0.38
RRS1	23212		0	-0.21	-0.06	0.46	0.46	0.46	0	0.45	0.11	0.24	-0.38
CSRP1	1465		-0.19	-0.03	1.25	0.63	0.63	0.63	0.27	0.03	3.11	3.81	-0.38
PTGS1	5742	00590|01100|04611|04726|04923	0.51	0.51	-0.59	0.81	0.81	0.81	0.7	0.71	0.85	1.12	-0.38
GMPR2	51292	00230	-0.47	-0.48	0.97	0.65	0.65	0.65	0.85	0.88	2.22	2.78	-0.38
M6PR	4074	04142|04145	0.34	-0.25	0.08	0.86	0.86	0.86	0.39	0.26	0.08	0.18	-0.39
CHCHD5			0.03	0.18	-0.1	0.53	0.53	0.53	0.05	0.31	0.15	0.04	-0.39
COL6A1	1291	04151|04510|04512|04974|05165	-0.67	0.37	-0.14	0.87	0.87	0.87	0.93	0.43	0.13	0.72	-0.39
S100A4	6275		-0.09	0.05	0	0.98	0.98	0.98	0.07	0.04	0	0	-0.39
UBXN7	26043		0.03	-0.11	0.49	0.37	0.37	0.37	0.06	0.28	1.92	1.59	-0.4
NDUFS2	4720	00190|01100|04714|04723|04932|05010|05012|05016	-0.03	0.11	0.09	0.6	0.6	0.6	0.04	0.15	0.12	0.07	-0.4
SOD2	6648	04068|04146|04211|04213|05016	-0.09	0.36	-0.23	1.32	1.32	1.32	0.05	0.25	0.15	0.02	-0.4
DHX38	9785	03040	-0.03	-0.26	0.26	1.04	1.04	1.04	0.02	0.22	0.22	0.03	-0.4
NPM3	10360		-0.24	-0.45	0.28	0.56	0.56	0.56	0.43	0.99	0.51	0.62	-0.4
CORO1C	23603		-0.08	-0.59	0.68	0.53	0.53	0.53	0.13	1.49	1.8	1.49	-0.4
MCRIP1			0.07	-0.15	0.52	0.47	0.47	0.47	0.13	0.32	1.48	1.02	-0.41
NOL3	8996		-0.14	-0.87	0	0.81	0.88	0.81	0.15	1.28	0	0.81	-0.41
OBSCN	84033		0.45	0.41	-0.03	0.59	0.59	0.59	0.9	0.78	0.04	0.64	-0.42
MT2A	4502	04978	0.79	-0.45	-0.82	0.78	0.78	0.78	1.33	0.63	1.38	3.61	-0.42
NCOA5	57727		0.18	0.16	-0.08	1.23	1.23	1.23	0.13	0.11	0.05	0.02	-0.42
COL12A1	1303	04974	-0.46	0.54	0.15	0.67	0.67	0.67	0.79	0.99	0.2	1.77	-0.42
TFPI2	7980		0.13	-0.53	0.91	0.95	0.95	0.95	0.11	0.59	1.23	0.65	-0.42
SH3PXD2B	285590		-0.7	-0.11	0.2	0.92	0.92	0.92	0.94	0.11	0.2	0.75	-0.42
ALDH2	217	00010|00053|00071|00280|00310|00330|00340|00380|00410|00561|00620|01100	0.18	-0.07	0.25	0.69	0.69	0.69	0.24	0.08	0.34	0.05	-0.43
PMPCA	23203		-0.11	-0.34	0.17	0.58	0.58	0.58	0.16	0.66	0.28	0.22	-0.43
SASH1	23328		0.15	0.02	-0.88	0.52	0.52	0.52	0.29	0.03	2.32	2.5	-0.43
GALK1	2584	00052|00520|01100	-0.21	-0.18	-0.38	0.49	0.49	0.49	0.42	0.36	0.91	0.87	-0.43
MARCKSL1	65108	04666|05140	-0.29	0.46	1.4	0.65	0.65	0.65	0.45	0.82	3.42	5.19	-0.44
AKR1C2			0.63	0.83	-0.11	1.27	1.27	1.27	0.51	0.73	0.07	0.38	-0.44
DHPS	1725		0.08	-1.03	0.82	0.76	0.62	0.76	0.08	2.48	1.43	1.62	-0.28
DEK	7913		0.02	-0.21	1.35	1.06	1.06	1.06	0.01	0.17	1.79	1.6	-0.44
MYO1E	4643		0.08	-0.36	-0.29	0.81	0.81	0.81	0.08	0.44	0.34	0.59	-0.44
FKBP5	2289	04915	0.14	-0.25	-1.44	0.35	0.35	0.35	0.39	0.83	6.57	8.21	-0.45
TNS3	64759		-0.13	-0.21	0.37	0.72	0.72	0.72	0.16	0.26	0.53	0.3	-0.46
SNX18	112574		-0.09	0.28	-0.4	0.79	0.79	0.79	0.09	0.34	0.53	0.14	-0.46
MCMBP	79892		0.33	-0.2	-0.08	0.93	0.93	0.93	0.37	0.2	0.08	0.29	-0.47
AFAP1	60312		0.61	-0.31	1.82	0.85	0.85	0.85	0.84	0.35	3.44	2.88	-0.49
PTPN23	25930		-0.07	-0.44	-0.65	1.36	1.36	1.36	0.04	0.3	0.48	0.5	-0.49
HEATR1	55127	03008	-0.37	-0.24	0.45	0.77	0.77	0.77	0.5	0.29	0.64	0.75	-0.5
PTGES2	80142	00590|01100	-0.13	-1.14	0.19	0.8	0.8	0.8	0.14	2.06	0.21	1.38	-0.24
NELFA	7469		-0.91	0.07	-0.19	0.44	0.44	0.44	2.76	0.15	0.45	2.19	-0.27
KDELC1	79070		0.06	-0.36	-0.26	1.66	1.66	1.66	0.03	0.19	0.13	0.09	-0.5
HIST2H3A	333932	05034|05202|05322	0.48	-1.18	0.78	0.61	0.61	0.61	0.94	3.01	1.78	2.31	-0.3
RNF213	57674		-0.43	-0.04	0.17	0.75	0.75	0.75	0.63	0.04	0.19	0.47	-0.51
PAWR	5074		0.41	0.97	0.93	1.12	1.12	1.12	0.35	1.08	1.02	1.85	-0.52
PNPT1	87178	00230|00240|03018	0.14	-1.2	0.77	0.9	0.9	0.9	0.13	1.9	1.05	1.1	-0.36
NCSTN	23385	04330|05010	-0.02	-0.55	-0.05	0.92	0.92	0.92	0.01	0.65	0.04	0.33	-0.55
MT1F	4494	04978	0.54	0.31	-1.35	0.77	0.77	0.77	0.81	0.4	2.72	3.55	-0.56
MMP1	4312	03320|04657|04926|05200|05219|05323	0	-1.45	1.75	0.76	0.76	0.76	0	3.02	3.74	3.38	-0.58
GET4	51608		-0.35	-0.3	0.07	0.75	0.75	0.75	0.51	0.43	0.08	0.26	-0.59
COL1A1	1277	04151|04510|04512|04611|04926|04933|04974|05146|05165	0.02	1.15	0.43	1.18	1.18	1.18	0.01	1.26	0.35	1.41	-0.6
EXOC5	10640		-0.31	-1.46	1.78	1.04	1.04	1.04	0.27	2.04	2.61	2.47	-0.51
FSBP			0.15	-0.36	-0.96	0.98	0.98	0.98	0.14	0.39	1.27	1.64	-0.63
HIST1H2BO	8348	05034|05203|05322	-0.9	-0.14	1.42	0.88	0.88	0.88	1.33	0.13	2.42	3.93	-0.66
F3	2152	04610|04933	0.48	0.24	0.17	1.62	1.62	1.62	0.27	0.12	0.08	0.04	-0.67
CELF1	10658		0.32	0.05	0.2	0.89	0.89	0.89	0.35	0.05	0.19	0.06	-0.68
GAP43	2596		-0.32	1.26	0.93	1.13	1.13	1.13	0.25	1.49	1	2.91	-0.84
KRT8	3856		-0.21	-1.18	1.12	1.1	1.1	1.1	0.16	1.42	1.33	1.12	-0.86
KRT7	3855		-0.83	-1.1	1.21	2.03	2.19	2.19	0.41	0.52	0.59	0.56	-0.94
USP47	55031
ILKAP	80895
COX7A2	1347	00190|04260|04714|04932|05010|05012|05016
ZNF787	126208
TUBB8	347688	04145|04540|05130
CCDC151	115948
ZNF865	100507290
RNA28S5
CC2D1A	54862
ACTB	60	04015|04145|04210|04390|04510|04520|04530|04611|04670|04714|04810|04919|04921|04971|05100|05110|05130|05131|05132|05164|05205|05225|05410|05412|05414|05416|05418
PQLC2	54896
GPR155	151556
VIM	7431	05169|05206
UBC	7316	03320
RPS8	6202	03010
C5orf63	401207
TONSL	4796
PTK6	5753
FAM74A4	401508
EXOSC2	23404	03018
MTRNR2L6	100463482
RPL41	6171	03010
RPLP1	6176	03010
TSR1	55720
RPLP0	6175	03010
MTRNR2L2	100462981
RPS21	6227	03010
RNU4ATAC	100151683
AS3MT
CYP2W1	54905
FUT6	2528	00601|01100
HLA-E	3133	04144|04145|04218|04514|04612|04650|04940|05163|05165|05166|05167|05168|05169|05170|05203|05320|05330|05332|05416
PTMA	5757	05169
RPL38	6169	03010
SNORD3B-1	26851	03008|03013
OAZ1	4946
RPS6	6194	01521|03010|04066|04150|04151|04371|04714|04910|05205
FTH1	2495	04216|04217|04978
RPL23	9349	03010
SLC16A12	387700
RPL31	6160	03010
RRP7B	91695
MT1L	4500
MT1A	4489	04978
NPM1	4869
CALR	811	04141|04145|04612|05142|05163|05166|05170
MTRNR2L1	100462977
SVOP	55530
RPL35	11224	03010
RPL36A	6173	03010
RPS5	6193	03010
RPS19	6223	03010
SUZ12P1
MT1B	4490	04978
ADAMTS7	11173
RPS28	6234	03010
LCE1D	353134
RPL5	6125	03010
RPL27	6155	03010
TYMP	1890	00240|00983|01100|05219
HSCB	150274
CD63	967	04142|05205
RPL15	6138	03010
SNAR-A3
RPL21	6144	03010
RPL37	6167	03010
POLR2L	5441	00230|00240|01100|03020|04623|05016|05169
RPL14	9045	03010
RGS4	5999
P4HB	5034	04141
CATSPER2P1	440278
HIST1H4C	8364	05034|05203|05322
TPSG1	25823
RPL13AP3	645683
MT1HL1	645745	04978
EIF3C	8663	03013
SNAR-B2
SLC35E4	339665
RPL9	6133	03010
ATP5E	514	00190|01100|04714|05010|05012|05016
GSTP1	2950	00480|00980|00982|00983|01524|05200|05204|05215|05225|05418
NPIPB5	100132247
RPL7	6129	03010
LINC01356	100996702
MAML1	9794	04330|04658|05165
RPS23	6228	03010
ATP6V0C	527	00190|01100|04142|04145|04721|04966|05110|05120|05152|05165|05323
GPX1	2876	00480|00590|04918|05014|05016
TOMM7	54543	04137
XRCC6	2547	03450
LDHB	3945	00010|00270|00620|00640|01100|04922
RPL23P8
RPS2P32
NME2	4831	00230|00240|00983|01100
UBB	7314	04137|04144|05012|05167
MZT2B	80097
PIEZO1	9780
SLC25A6	293	04020|04022|04217|04218|05012|05016|05164|05166
HSPB1	3315	04010|04370|05146|05169
PPIA	5478	04217
RPL22L1	200916	03010
SNAR-D
RPSAP58
RNF170	81790
TIMP1	7076	04066
VCP	7415	04141|05134
LBX1	10660
RPL29	6159	03010
DNM1	1759	04072|04144|04721|04961|05100
ANAPC11	51529	04110|04114|04120|04914|05166
TMEM88B	643965
TMSB10	9168
H3F3A	3020	05034|05202|05322
COX6A1	1337	00190|01100|04260|04714|04932|05010|05012|05016
CALY	50632	04728
PTMS	5763
DIABLO	56616	04210|04215
RPL39	6170	03010
EEF1B2	1933
NKX2-5	1482
SLC2A11	66035
FOXP4	116113
LOC100506679	100506679
SEPT9	10801	05100
RPL18A	6142	03010
EMILIN1	11117
UBA52	7311	03010
A*03:01:0:01 allele	3105	04144|04145|04218|04514|04612|04650|04940|05163|05165|05166|05167|05168|05169|05170|05203|05320|05330|05332|05416
CDC42EP5	148170
MINOS1-NBL1
MTCH1	23787
PDZD7	79955
CCM2L	140706
CYR61	3491
SNAR-G2
ATP5G3	518	00190|01100|04714|05010|05012|05016
CAPN2	824	04141|04210|04217|04218|04510|05010
VPS9D1	9605
FSTL1	11167
RPL19P12
HNRNPA1	3178	03040
LGALS3	3958
RPS10P7
SNAR-H
RABAC1	10567
SLC16A3	9123	05230
SPARC	6678
LRRC26	389816
PPDPF	79144
TMBIM6	7009
DUX4	100288687
TMSB4X	7114	04810
PRR36	80164
TXN	7295	04621|05418
GPAA1	8733	00563|01100
IFITM3	10410
DYNLL1	8655	04962
COX8A	1351	00190|01100|04260|04714|04932|05010|05012|05016
NDUFB2	4708	00190|01100|04714|04723|04932|05010|05012|05016
CELSR1	9620
ATF4	468	04010|04022|04137|04141|04151|04210|04211|04261|04668|04720|04722|04725|04728|04911|04912|04915|04918|04922|04925|04926|04927|04928|04932|04934|05030|05031|05034|05161|05163|05166|05203|05215
NFKBIL1	4795
RNA18S5
HTRA1	5654
SH3BGRL3	83442
TK1	7083	00240|00983|01100
HCN2	610	04024
PLAT	5327	04371|04610|05202|05215|05418
HIST3H3	8290	05034|05202|05322
NAA38	84316
KPNA2	3838	05164
UQCRH	7388	00190|01100|04260|04714|04932|05010|05012|05016
ALPK1	80216
UQCR11	10975	00190|01100|04260|04714|04932|05010|05012|05016
RPL21P44
RPL23AP7
ATP5G2	517	00190|01100|04714|05010|05012|05016
USMG5	84833
HLA-G	3135	04144|04145|04218|04514|04612|04650|04940|05163|05165|05166|05167|05168|05169|05170|05203|05320|05330|05332|05416
RNASEK	440400
SLC20A1	6574
RPS7P5
TIMP2	7077
LAPTM4A	9741	04142
PPP1R14B	26472
SHISA5	51246	04115
GAS5	60674
QSOX1	5768
MYL12A	10627	04510|04530|04611|04670|04810
SOD1	6647	04146|04213|05014|05016|05020
IFITM2	10581
POTEM	641455
PKM	5315	00010|00230|00620|01100|01200|01230|04922|04930|05165|05203|05230
EMP1	2012
IP6K1	9807	04070
ANXA5	308
ZNF526	116115
NGFRAP1	27018	04722
LRRC75A-AS1
MCM7	4176	03030|04110
PPIAL4G	644591
DSTN	11034
NME1	4830	00230|00240|00983|01100
COX7C	1350	00190|01100|04260|04714|04932|05010|05012|05016
EFEMP1	2202
RPSAP9
SORBS3	10174
SDF2L1	23753
DAD1	1603	00510|01100|04141
CKAP4	10970	04141
SNHG5
GALR3	8484	04080
NACA2	342538
MRPS16	51021	03010
GNB2L1	10399	05162
NDUFA4	4697	00190|01100|04714|04723|04932|05010|05012|05016
YIF1A	10897
SLC25A5	292	04020|04022|04217|04218|05012|05016|05166
HOMER3	9454	04068|04724
GSTO1	9446	00480|00980|00982|00983|01524|05200|05204|05225|05418
RN7SK	125050
PRDX6	9588	01100
NCOR2	9612	04330|05169
PGAM4	441531	00010|00260|01100|01200|01230|04922|05230
ARHGAP33	115703
MTRNR2L8	100463486
FOXD3-AS1	100996301
KIF1C	10749
BRI3	25798
ANKRD42	338699
UQCR10	29796	00190|01100|04260|04714|04932|05010|05012|05016
PSMB7	5695	03050
PRDX4	10549
MRPS24	64951
C11orf31	280636
MRPL51	51258
ZNF467	168544
NDUFB9	4715	00190|01100|04714|04723|04932|05010|05012|05016
NOP10	55505	03008
TALDO1	6888	00030|01100|01200|01230
ADAMTSL5	339366
SPON2	10417
PRELID1	27166
TMEM8C	389827
RPL32P3
NDUFAF3	25915	04714
RPL10L	140801	03010
HMGB1	3146	03410|04140|04217
TNFRSF12A	51330	04060
CCT7	10574
ILDR1	286676
ELAC2	60528	03013
ODF2L	57489
PPIAL4B	105371242
HIST1H4L	8368	05034|05203|05322
EIF3E	3646	03013|05160
ATP5A1	498	00190|01100|04714|05010|05012|05016
HGS	9146	04144|04145
CCNI	10983
VSX1	30813
CCT3	7203
GOT2	2806	00220|00250|00270|00330|00350|00360|00400|01100|01200|01210|01230|04975
IER2	9592
CD276	80381	04514
SNRPG	6637	03040
FAM229A	100128071
MARVELD1	83742
SEPW1	6415
GLTSCR2	29997	05168
B2M	567	04612|05163|05170
FTL	2512	04216|04217|04978
PTTG1	9232	04110|04114|05166
MINOS1	440574
BRK1	55845	04810
POTEI	653269
LOC102723701	102723701
KCTD21-AS1	100289388
PRRT3-AS1	100874032
EN2	2020
ANTXRL	195977
C17orf89	284184
EDARADD	128178
INTS1	26173
LOC102031319
GNG11	2791	04014|04062|04151|04371|04713|04723|04724|04725|04726|04727|04728|04926|05032|05034|05163|05167|05170|05200
GIPC1	10755
UFD1L	7353	04141
ODC1	4953	00330|00480|01100
L2HGDH	79944	00650
LINC01001
UBL5	59286
TMEM184B	25829
H2AFV	94239	04217|05034|05322
RBM8A	9939	03013|03015|03040
CNPY2	10330
ADIRF	10974
UTS2R	2837	04080
NOL7	51406
ATPIF1	93974
IFI27L2	83982
TUBB2A	7280	04145|04540|05130
NDUFB4	4710	00190|01100|04714|04723|04932|05010|05012|05016
SLC52A2	79581
ADAM15	8751
TIMM8B	26521
OST4	100128731
FTHL17	53940
HNRNPA1L2	144983	03040
C20orf27	54976
RPSAP36
OGFR	11054
SSR1	6745	04141
PSMG3-AS1	114796
PCBP1-AS1	400960
IMPDH1	3614	00230|00983|01100
LDLR	3949	04144|04913|04925|04927|04934|04976|04979|05145|05160
PA2G4	5036
CLPP	8192
NBPF10	100132406
H3F3C	440093	05034|05202|05322
SNAR-F
COL4A2	1284	04151|04510|04512|04926|04933|04974|05146|05165|05200|05222
SF3B5	83443	03040
HIST1H2AJ	8331	04217|05034|05322
ARHGAP4	393
SERF2	10169
FOXP1	27086	05206
CASKIN1	57524
ANXA2P1
RPL39P5
SREBF1	6720	04152|04910|04931|04932
ELFN1	392617
FAM195B	348262
ZNHIT1	10467
TPI1P2	286016
PSMC1	5700	03050|05165|05169|05203
CDK2AP1	8099
SLC39A13	91252
C14orf166	51637
PRR13	54458
HIST2H3D	653604	05034|05202|05322
RN7SL1	6029
LEPR	3953	04060|04080|04152|04630|04920|04932
ID1	3397	04015|04350|04390|04550
SNORA16A	692073
CTSL	1514	04140|04142|04145|04210|04612|05205|05323|05418
JPH3	57338
NDUFB8	4714	00190|01100|04714|04723|04932|05010|05012|05016
FBRSL1	57666
SMARCA4	6597	04714|05225
STMN1	3925	04010|05206
SET	6418
PHRF1	57661
KRT81	3887
PEBP1	5037
NCOA4	8031	04216|05200|05216
POTEF	728378
CD99L2	83692
TADA3	10474	05165
LOC400558	400558
AXL	558	01521
MYEOV2	150678
SLC38A10	124565
SHFM1	7979	03050|03440|05169
ANTXR2	118429	04621
POLR2F	5435	00230|00240|01100|03020|04623|05016|05169
IFITM4P
CTDSP2	10106
ANO10	55129
H2AFJ	55766	04217|05034|05322
DVL1	1855	04150|04310|04330|04390|04550|04916|04934|05165|05166|05200|05217|05224|05225|05226
C1R	715	04145|04610|05133|05150|05322
TMED10	10972
GLUD1P3
MORF4L1	10933
HIST1H2AK	8330	04217|05034|05322
SCGB3A1	92304
ATP5F1	515	00190|01100|04714|05010|05012|05016
SLC38A2	54407	04724|04727|04974
SCARB2	950	04142
[truncated: 21,608 more rows]
