# Supplementary material for: Adventitial fibroblasts direct smooth muscle cell-state transition in pulmonary vascular disease
Source: bioRxiv preprint, doi:10.1101/2024.05.15.594343, version 4 (2025-02-20)
Supplement: RNA-Seq from co-cultured PASMC [file 594343_file06.xlsx]

## Sheet: all_genes
Symbol	_baseMean	_log2FoldChange	_lfcSE	_stat	_pvalue	_padj	_DonorSMC_cocult_IPAHAdFb_1.x	_DonorSMC_cocult_IPAHAdFb_10.x	_DonorSMC_cocult_IPAHAdFb_11.x	_DonorSMC_cocult_IPAHAdFb_12.x	_DonorSMC_cocult_IPAHAdFb_2.x	_DonorSMC_cocult_IPAHAdFb_3.x	_DonorSMC_cocult_IPAHAdFb_4.x	_DonorSMC_cocult_IPAHAdFb_5.x	_DonorSMC_cocult_IPAHAdFb_6.x	_DonorSMC_cocult_IPAHAdFb_7.x	_DonorSMC_cocult_IPAHAdFb_8.x	_DonorSMC_cocult_IPAHAdFb_9.x	_SMC_Ctrl_1.x	_SMC_Ctrl_2.x	_SMC_Ctrl_3.x	_SMC_Ctrl_4.x	_DonorSMC_cocult_IPAHAdFb_1.y	_DonorSMC_cocult_IPAHAdFb_10.y	_DonorSMC_cocult_IPAHAdFb_11.y	_DonorSMC_cocult_IPAHAdFb_12.y	_DonorSMC_cocult_IPAHAdFb_2.y	_DonorSMC_cocult_IPAHAdFb_3.y	_DonorSMC_cocult_IPAHAdFb_4.y	_DonorSMC_cocult_IPAHAdFb_5.y	_DonorSMC_cocult_IPAHAdFb_6.y	_DonorSMC_cocult_IPAHAdFb_7.y	_DonorSMC_cocult_IPAHAdFb_8.y	_DonorSMC_cocult_IPAHAdFb_9.y	_SMC_Ctrl_1.y	_SMC_Ctrl_2.y	_SMC_Ctrl_3.y	_SMC_Ctrl_4.y
CXCL2	2640.98	0.977556	0.11154	9.27222	1.82303e-20	3.67869e-16	2221.43	2254.36	2727.52	2605.81	1974.23	2904.89	2739.82	4195.93	4393.31	4951.3	5668.58	1990.4	853.176	836.002	933.996	1004.88	-0.281505	-0.259408	0.0580699	-0.0235994	-0.447367	0.177079	0.0663229	1.04332	1.17576	1.55015	2.03142	-0.436513	-1.19956	-1.21108	-1.14533	-1.09777
FOSB	17805.7	0.771535	0.114784	7.63544	2.2505e-14	2.27064e-10	8427.51	25818.1	25143.2	40847.5	16293.8	10721.9	16176.2	14064	17985.3	33557.2	32374.3	20679.9	4780.2	4818.52	6351.62	6851.71	-0.841237	0.718723	0.658182	2.06689	-0.135617	-0.635425	-0.146164	-0.335634	0.0161104	1.41293	1.30683	0.257825	-1.16841	-1.16497	-1.02745	-0.982589
GTF2IP4	399.713	0.00923713	0.0158875	7.30863	2.69883e-13	1.81532e-09	899.606	1545.74	903.167	811.141	0	0	1116.18	0	0	1119.59	0	0	0	0	0	0	0.901208	2.06605	0.907627	0.741723	-0.720604	-0.720604	1.29164	-0.720604	-0.720604	1.29779	-0.720604	-0.720604	-0.720604	-0.720604	-0.720604	-0.720604
RNA5S6	263.912	0.00923615	0.0158867	7.15604	8.30394e-13	3.35131e-09	0	1944.17	149.527	0	0	707.325	1244.33	0	0	0	147.634	29.6004	0	0	0	0	-0.468534	2.98305	-0.203073	-0.468534	-0.468534	0.787212	1.74057	-0.468534	-0.468534	-0.468534	-0.206432	-0.415983	-0.468534	-0.468534	-0.468534	-0.468534
SMN1	23.4747	-0.027614	0.0158578	-7.16178	7.96389e-13	3.35131e-09	0	0	0	0	0	0	0	0	0	0	0	0	0	375.595	0	0	-0.25	-0.25	-0.25	-0.25	-0.25	-0.25	-0.25	-0.25	-0.25	-0.25	-0.25	-0.25	-0.25	3.75	-0.25	-0.25
FOS	15867.1	0.751551	0.115295	7.0273	2.10563e-12	7.08158e-09	8366.33	20874.6	22774.1	32638.1	12279.2	9804.01	9595.79	13654	18098.6	29598.8	30813.9	19273.5	4810.84	5212.29	7817.89	8261.58	-0.808476	0.539736	0.744477	1.80768	-0.386726	-0.653515	-0.675958	-0.238542	0.240527	1.48009	1.61106	0.36716	-1.19171	-1.14844	-0.867591	-0.819767
MIR3648-1	78.9338	0.0100229	0.0165404	6.95864	3.43561e-12	9.90389e-09	0	722.901	0	61.3964	0	0	329.343	100.333	0	0	9.50123	39.4672	0	0	0	0	-0.413405	3.37269	-0.413405	-0.0918498	-0.413405	-0.413405	1.31148	0.112075	-0.413405	-0.413405	-0.363644	-0.206701	-0.413405	-0.413405	-0.413405	-0.413405
ZFP36	2113.22	0.756349	0.11423	6.9392	3.94331e-12	9.94651e-09	1428.57	2733.27	2353.71	3141.84	1172.77	1923.55	1682.6	2804.64	3048.25	4092.51	4185.66	1680.95	908.879	948.681	857	848.688	-0.611383	0.553692	0.214751	0.918547	-0.839811	-0.169378	-0.384545	0.61743	0.834971	1.76748	1.85066	-0.386018	-1.07547	-1.03992	-1.12179	-1.12921
KLF4	1794.5	0.75132	0.112836	6.85929	6.92044e-12	1.55164e-08	666.908	2206.34	2278.94	3459.45	972.408	862.559	1108.49	2257.49	2719.28	3578.41	3339.32	1880.08	499.466	1256.43	777.772	848.688	-1.05908	0.386816	0.45501	1.56379	-0.772145	-0.87532	-0.644333	0.434861	0.868588	1.67552	1.45096	0.0803758	-1.21635	-0.505382	-0.954956	-0.888348
TRIB1	3733.51	0.687994	0.103232	6.78618	1.1514e-11	2.32341e-08	2879.94	5112.22	4872.96	5531.58	3077.15	3209.96	3913.67	3905.63	3953.76	4796.33	5216.9	4228.38	2083.27	1496.32	2827.65	2630.38	-0.716012	1.15653	0.955829	1.50831	-0.550583	-0.439174	0.151128	0.144384	0.184758	0.891542	1.24434	0.415121	-1.38429	-1.87665	-0.759872	-0.925352
ATF3	1087.35	0.615781	0.111519	6.64975	2.93584e-11	5.38566e-08	291.472	1700.18	2281.61	4281.22	650.723	379.31	333.187	510.36	745.421	1147.38	1471.96	1890.84	123.474	142.969	699.66	747.786	-0.742582	0.571797	1.1143	2.98001	-0.407387	-0.660626	-0.703661	-0.538351	-0.31903	0.0560107	0.358858	0.74969	-0.899331	-0.881142	-0.361727	-0.316824
RNA5S3	97.1389	0.00922941	0.0158813	6.57085	5.00299e-11	8.41294e-08	0	0	0	0	0	957.049	597.174	0	0	0	0	0	0	0	0	0	-0.355241	-0.355241	-0.355241	-0.355241	-0.355241	3.14473	1.82865	-0.355241	-0.355241	-0.355241	-0.355241	-0.355241	-0.355241	-0.355241	-0.355241	-0.355241
PMAIP1	449.408	0.67813	0.10686	6.3928	1.62873e-10	2.52817e-07	705.291	188.188	184.238	264.477	681.973	754.57	935.487	553.838	610.09	609.227	646.814	152.487	483.683	218.088	91.5026	110.578	0.941198	-0.960831	-0.975359	-0.680222	0.855427	1.12246	1.78791	0.384118	0.591027	0.587851	0.726106	-1.09215	0.126071	-0.850853	-1.31646	-1.2463
WASH5P	159.522	-0.529103	0.0862062	-6.1773	6.52067e-10	9.39861e-07	201.512	71.3816	63.4153	56.6736	220.584	206.528	197.349	149.162	196.395	172.614	165.906	67.2737	309.149	267.763	107.125	99.5205	0.550234	-1.15499	-1.25938	-1.34773	0.800158	0.615969	0.49569	-0.135761	0.483186	0.171561	0.0836562	-1.20882	1.96071	1.41839	-0.686611	-0.78626
JUN	29426.8	0.660757	0.113468	6.07622	1.23051e-09	1.65537e-06	24051.9	34758.9	30498.1	38709.3	31260.4	29486.3	41231.9	33489.8	31127.8	49406.7	42272.4	24673.3	19343.6	10631.8	14243.2	15644.1	-0.494947	0.490999	0.0986429	0.854759	0.168845	0.00547369	1.08705	0.374133	0.156632	1.83982	1.18287	-0.437722	-0.9285	-1.73072	-1.39817	-1.26917
PIM1	800.252	0.571966	0.0946014	6.05491	1.405e-09	1.77197e-06	540.963	1469.16	1286.33	1316.48	525.725	624.984	767.612	723.735	708.563	820.319	664.355	1097.01	400.129	522.199	655.025	681.439	-0.81496	2.10243	1.52777	1.62254	-0.862852	-0.550877	-0.102589	-0.240496	-0.288183	0.0630712	-0.427132	0.932728	-1.25761	-0.873938	-0.456458	-0.373436
KLF6	11798	0.646726	0.114191	5.90209	3.58924e-09	4.26043e-06	9616.19	13739	14069.5	19573.6	12104.6	10584.2	11988.3	9866.08	11211	20040.9	18740.1	12966.8	7093.71	4813.68	5876.25	6484.03	-0.464076	0.412856	0.483155	1.6539	0.0652047	-0.258171	0.0404841	-0.410924	-0.12485	1.75328	1.47659	0.248603	-1.00061	-1.48558	-1.25957	-1.13029
CYR61	9944.97	0.501802	0.0859839	5.86458	4.50268e-09	5.04776e-06	9197.57	12106.3	12354.6	14764.7	8240.65	8884.76	9711.13	8345.7	9418.17	11551.8	11651.4	12841.2	6425.28	5650.89	8428.28	9547.05	-0.307956	0.890554	0.992869	1.98589	-0.70224	-0.436845	-0.0963523	-0.658959	-0.217062	0.662072	0.703123	1.19336	-1.45024	-1.76932	-0.624932	-0.163956
DYRK3	647.708	0.470562	0.0826408	5.69623	1.22489e-08	1.3009e-05	543.362	856.579	968.585	1129.93	556.975	483.249	558.729	515.712	530.322	621.518	676.049	873.661	365.78	415.578	649.445	617.856	-0.500793	1.00244	1.54	2.31435	-0.43546	-0.789296	-0.42704	-0.633497	-0.563376	-0.125694	0.136016	1.08443	-1.35307	-1.11407	0.00833653	-0.143269
SNORD118	0.454349	-0.0187335	0.0150196	-5.67787	1.36382e-08	1.37603e-05	0	0	0	0	0	0	0	0	0	0	0	0	0	7.26959	0	0	-0.25	-0.25	-0.25	-0.25	-0.25	-0.25	-0.25	-0.25	-0.25	-0.25	-0.25	-0.25	-0.25	3.75	-0.25	-0.25
INSIG1	3721.68	0.278406	0.0492565	5.65316	1.57527e-08	1.44488e-05	3628.41	5178.41	5352.92	5169.1	3834.49	3645.96	3695.81	2670.2	2872.76	2768.78	2573.37	4776.43	3270.66	2294.77	3939.07	3875.77	-0.0952553	1.48771	1.66592	1.4782	0.115204	-0.0773282	-0.0264174	-1.07385	-0.866975	-0.973171	-1.17273	1.07718	-0.46061	-1.45726	0.222015	0.157364
RRAD	1103.45	0.535944	0.112151	5.65564	1.55266e-08	1.44488e-05	166.727	3819.56	2092.7	2573.93	345.582	326.665	606.144	738.451	766.876	998.811	1087.52	1765.26	127.187	132.064	950.734	1156.93	-0.923298	2.6772	0.975082	1.44941	-0.747006	-0.765651	-0.490177	-0.359766	-0.331748	-0.103136	-0.0156938	0.652333	-0.962271	-0.957464	-0.150525	0.0527124
RNA5S10	9.48502	-0.0274811	0.0158199	-5.49263	3.95999e-08	3.47429e-05	0	0	0	0	0	0	0	0	0	0	0	0	0	0	151.76	0	-0.25	-0.25	-0.25	-0.25	-0.25	-0.25	-0.25	-0.25	-0.25	-0.25	-0.25	-0.25	-0.25	-0.25	3.75	-0.25
RNASE2	0.227175	-0.010423	0.0149921	-5.39546	6.83483e-08	5.74667e-05	0	0	0	0	0	0	0	0	0	0	0	0	0	3.63479	0	0	-0.25	-0.25	-0.25	-0.25	-0.25	-0.25	-0.25	-0.25	-0.25	-0.25	-0.25	-0.25	-0.25	3.75	-0.25	-0.25
RNY3	33.1123	-0.624807	0.114325	-5.25997	1.4408e-07	0.000116295	29.9869	32.4462	22.0285	24.7947	20.2202	43.1954	24.3483	16.7222	21.4549	16.0323	18.2716	12.5578	104.906	32.7131	71.4166	38.7024	-0.130996	-0.0279207	-0.464553	-0.348613	-0.540341	0.422608	-0.367323	-0.686953	-0.488591	-0.715868	-0.622013	-0.861494	3.00907	-0.0167315	1.60543	0.234294
IRF1	1040.88	0.455896	0.0871811	5.24032	1.60295e-07	0.000124407	969.175	981.172	823.063	740.299	1145.2	1202.72	1280.21	1454.16	1530.45	1450.92	1484.38	733.732	790.047	808.136	655.025	605.416	-0.221919	-0.184791	-0.674109	-0.93025	0.322843	0.500868	0.74067	1.27902	1.51513	1.269	1.37256	-0.950574	-0.77629	-0.720308	-1.19416	-1.34769
SGK1	3561.55	0.473438	0.0916061	5.21954	1.79365e-07	0.000134052	2731.2	4154.41	4826.9	5280.09	2775.68	2941.34	3188.35	2906.98	3723.26	3962.65	4056.29	5149.58	1464.98	2475.29	3735.98	3611.76	-0.810908	0.578985	1.23574	1.67832	-0.76747	-0.605691	-0.364466	-0.639245	0.157925	0.391713	0.483166	1.55086	-2.0475	-1.06083	0.170354	0.0490417
PTGER4	952.212	0.554551	0.11173	5.13623	2.80299e-07	0.000202006	963.178	669.689	954.567	885.525	1016.53	1213.52	1132.84	1109.68	1270.24	1474.44	1573.55	835.091	649.862	374.384	598.114	514.189	0.0322864	-0.831809	0.00693245	-0.196341	0.189352	0.769352	0.531797	0.463628	0.936349	1.53754	1.82935	-0.344829	-0.890183	-1.70125	-1.04254	-1.28963
EGR1	17408.3	0.556045	0.113507	5.0857	3.66271e-07	0.000254862	17392.4	16058.3	22794.8	28490.3	15837.9	20164.2	16437.7	13566.4	19750.6	22902.7	24550.4	19230.4	12161.7	6346.35	11956.7	10892	-0.00278017	-0.235848	0.941008	1.936	-0.274338	0.481445	-0.169567	-0.671178	0.409203	0.959853	1.24772	0.31832	-0.916567	-1.9325	-0.95238	-1.13839
OSR2	284.14	0.55578	0.115068	5.066	4.06253e-07	0.000273259	346.648	180.401	86.7788	192.454	461.388	399.558	602.3	354.51	352.081	499.139	448.75	93.2862	279.441	169.624	30.1289	49.7602	0.356984	-0.592462	-1.12714	-0.523625	1.01227	0.659153	1.81702	0.401883	0.388011	1.22786	0.940094	-1.08998	-0.0268401	-0.654011	-1.45067	-1.33856
RIMBP3C	0.928375	-0.0256209	0.015195	-5.04564	4.52011e-07	0.00029423	0	0	0	0	0	0	0	0	0	0	0	0	14.854	0	0	0	-0.25	-0.25	-0.25	-0.25	-0.25	-0.25	-0.25	-0.25	-0.25	-0.25	-0.25	-0.25	3.75	-0.25	-0.25	-0.25
BHLHE40	7338.28	0.496836	0.100955	5.02604	5.00716e-07	0.000311241	3572.04	10255.6	13698.4	13222.7	4073.45	4326.29	4189.19	5418.65	7387.1	7403.71	8858.07	10973.7	1928.23	4276.94	9211.63	8616.81	-1.05705	0.818785	1.78505	1.65154	-0.916319	-0.845356	-0.883836	-0.53877	0.013703	0.0183651	0.426551	1.02033	-1.51841	-0.859208	0.525784	0.35884
NFKBIA	7382.15	0.491681	0.0991938	5.02289	5.08992e-07	0.000311241	6457.97	6590.47	7430.93	6759.51	6338.12	8055.95	8666.71	10526.9	11096.6	9767.94	10739.3	6095	4680.86	4498.66	4957.88	5451.51	-0.420118	-0.359887	0.0221779	-0.283043	-0.474602	0.3063	0.583945	1.42958	1.68854	1.08455	1.52612	-0.58512	-1.22797	-1.31079	-1.10204	-0.877641
GEM	1117.66	0.337863	0.0680423	4.96226	6.96787e-07	0.000413543	1264.25	866.962	1012.64	1165.35	1305.12	1218.92	1295.59	1288.28	1383.02	1279.38	1291.44	969.638	1012.86	918.391	750.991	859.746	0.730417	-1.24919	-0.52329	0.237637	0.934099	0.504569	0.886577	0.850152	1.32224	0.80581	0.865899	-0.737569	-0.522219	-0.992927	-1.82706	-1.28515
DUSP1	20746.8	0.532009	0.115402	4.91348	8.9474e-07	0.000515856	8385.53	54183.8	33397.8	25774.7	9872.98	10003.8	19975.9	22887.3	19070.1	26463.4	26721.8	26608.1	6189.47	8473.91	15623.5	18317.3	-1.02181	2.76397	1.04575	0.415612	-0.898855	-0.888042	-0.0637311	0.176934	-0.1386	0.472545	0.493905	0.484503	-1.20334	-1.0145	-0.423505	-0.200831
PPP1R15A	9016.53	0.535977	0.113326	4.88029	1.05929e-06	0.000593764	6545.53	12957.7	9269.31	13805.9	8402.42	8423.11	13562	10002.5	9798.85	10823.4	10405.3	8378.72	6556.18	3774.13	5415.39	6144.01	-0.845982	1.34932	0.0865421	1.63972	-0.210251	-0.203167	1.55621	0.337571	0.267839	0.618607	0.475466	-0.218365	-0.842336	-1.79481	-1.2329	-0.983451
LOC284454	497.448	0.495457	0.113287	4.80653	1.53572e-06	0.000837547	182.32	866.962	549.376	1005.96	569.842	264.572	349.847	562.534	523.17	725.194	880.69	564.202	221.882	157.508	265.581	269.535	-1.17242	1.37475	0.193196	1.89188	0.269338	-0.866403	-0.549143	0.242147	0.0956979	0.847315	1.42583	0.248355	-1.02523	-1.26473	-0.86265	-0.84794
JUNB	10283.3	0.517694	0.111162	4.74772	2.05724e-06	0.00109245	7801.38	13728.6	10430.8	10036	7832.57	9812.11	13811.9	14450	13860.4	16094.8	14424.3	7314	6889.47	6440.85	5293.76	6311.26	-0.690758	0.958914	0.0410653	-0.068832	-0.682077	-0.131131	0.982089	1.15968	0.995601	1.61747	1.15254	-0.826407	-0.944562	-1.06942	-1.38868	-1.10549
SMAD7	3111.02	0.430246	0.092285	4.68381	2.81594e-06	0.001457	1952.74	4364.66	4151.36	3858.53	2397.01	2184.07	2948.71	3294.94	3324.41	4095.71	4078.95	3417.5	1448.26	2865.43	2510.74	2883.33	-1.33647	1.4465	1.20039	0.862503	-0.823854	-1.06956	-0.187287	0.212206	0.24622	1.13618	1.11683	0.353632	-1.91856	-0.283377	-0.69263	-0.262723
FAM71A	47.1257	0.402595	0.10107	4.63435	3.58059e-06	0.00180632	7.19685	59.701	56.74	210.165	36.764	16.1983	15.3779	35.451	51.7119	56.6474	61.3925	82.5224	4.64187	20.5972	22.3177	16.5867	-0.812122	0.255771	0.195547	3.31609	-0.210749	-0.62904	-0.645727	-0.237455	0.0932795	0.193664	0.290176	0.719942	-0.864088	-0.53957	-0.504576	-0.621139
NFATC2	913.366	0.481922	0.106257	4.60963	4.03386e-06	0.00198535	130.743	2110.3	1903.13	2570.38	226.099	198.429	181.971	568.554	602.939	609.227	852.187	1636.1	108.62	419.213	1368.08	1127.9	-0.995684	1.52278	1.25921	2.10812	-0.874368	-0.909571	-0.930508	-0.438684	-0.394938	-0.386938	-0.0778348	0.919486	-1.02383	-0.628681	0.578498	0.272936
ADRB2	166.963	0.509577	0.113394	4.57905	4.67098e-06	0.00224418	125.945	46.7225	50.7322	36.6017	110.292	140.385	161.468	335.781	447.803	424.321	445.827	47.5401	54.7741	165.989	41.2877	35.9379	-0.264121	-0.774246	-0.748426	-0.839415	-0.364912	-0.171138	-0.0353849	1.08704	1.80837	1.65717	1.79564	-0.768981	-0.7224	-0.00627205	-0.809241	-0.843689
LINC00880	198.736	0.468392	0.11371	4.44663	8.7227e-06	0.00409338	88.7611	160.933	229.63	331.777	213.231	176.831	139.682	151.168	256.909	426.993	410.014	203.615	69.6281	106.621	93.7343	120.254	-1.00087	-0.344043	0.281157	1.21078	0.131915	-0.199355	-0.537441	-0.432909	0.529419	2.07733	1.92281	0.0444	-1.17499	-0.838331	-0.955606	-0.714256
DUSP6	4283.71	0.481624	0.113359	4.4276	9.5288e-06	0.00437004	2887.14	5367.89	6359.55	7871.73	3544.05	2676.77	2989.71	3230.72	3655.59	5773.76	6372.4	5908.43	1892.03	1670.79	4251.52	4087.25	-0.777269	0.603409	1.15532	1.99693	-0.411659	-0.894351	-0.720178	-0.586044	-0.349582	0.829296	1.16247	0.904245	-1.3311	-1.45423	-0.0179133	-0.10934
ID4	1892.23	0.489269	0.112461	4.40827	1.04201e-05	0.00467262	1630.09	2996.73	1983.9	2282.29	1858.42	1657.62	2395.1	2542.44	2041.52	2429.43	2072	1569.72	1348.93	1578.71	778.888	1109.93	-0.459919	1.93777	0.16082	0.684338	-0.059319	-0.411604	0.882256	1.14075	0.261916	0.942473	0.315388	-0.565827	-0.953192	-0.550052	-1.95329	-1.3725
FAM46A	1822.99	0.398511	0.0934309	4.28834	1.80016e-05	0.00789682	1210.27	2264.74	2532.61	3425.21	1330.86	1235.12	1303.27	1614.69	1842.92	2021.67	2017.91	2379.7	750.127	1617.48	1744.13	1877.07	-0.95825	0.690879	1.1098	2.50578	-0.769658	-0.919387	-0.812796	-0.325759	0.031181	0.310731	0.304855	0.870658	-1.67788	-0.321395	-0.123329	0.084578
LOC100507156	164.281	0.480912	0.114684	4.27872	1.87973e-05	0.00807043	97.1574	243.995	200.926	283.368	220.584	128.236	192.223	167.222	138.632	121.845	201.718	217.967	112.333	73.9075	126.095	102.285	-1.11304	1.32182	0.60765	1.9747	0.933616	-0.597689	0.46334	0.0487619	-0.425312	-0.703665	0.620784	0.890216	-0.861393	-1.49857	-0.633198	-1.02802
EGR4	14.0139	0.32162	0.088721	4.25935	2.05025e-05	0.00861918	9.5958	25.9569	12.0155	22.4333	7.3528	28.347	39.7262	17.3911	13.7532	13.8946	17.5407	5.3819	5.57025	0	1.11589	4.14669	-0.405822	1.09703	-0.183558	0.773368	-0.611852	1.31657	2.36181	0.310212	-0.0239467	-0.0109506	0.32396	-0.79289	-0.775589	-1.28725	-1.18475	-0.906351
C11orf96	2691.5	0.419555	0.112307	4.19239	2.76034e-05	0.0113675	514.575	10060.9	4760.15	5481.99	424.624	688.427	1454.49	2571.2	1971.65	2085.8	2459.36	3813.07	386.204	659.109	2453.83	3278.65	-0.870297	2.94616	0.827009	1.11559	-0.906258	-0.800794	-0.494536	-0.0480948	-0.287783	-0.242149	-0.0928082	0.448385	-0.921618	-0.812515	-0.0950168	0.23473
CSRNP1	3856.49	0.452588	0.115014	4.16215	3.15261e-05	0.0127233	1988.73	8757.87	6217.37	5581.17	2084.52	2524.23	4228.91	3740.41	3269.4	3611.01	4144	4562.95	1580.09	1284.29	3810.75	4318.08	-0.983237	2.58022	1.24283	0.907918	-0.93281	-0.701333	0.196056	-0.0611039	-0.309057	-0.129228	0.151352	0.371902	-1.19835	-1.35407	-0.0240783	0.242996
LOX	5650.98	0.26983	0.0661328	4.10693	4.00954e-05	0.0158644	1916.76	11410.7	11662.4	11838.9	1645.19	1964.04	2088.83	2929.72	3109.32	3100.64	3568.81	11232.9	1412.06	2515.28	9549.74	10470.4	-0.855241	1.31913	1.37678	1.4172	-0.917438	-0.844412	-0.815832	-0.623244	-0.582112	-0.584098	-0.476876	1.27842	-0.970832	-0.718164	0.892927	1.10378
HIPK1-AS1	20.879	0.408942	0.105753	4.08235	4.45825e-05	0.0173006	20.3911	16.872	22.0285	44.8666	45.955	17.5481	11.5334	18.7288	24.2056	28.8581	24.8494	25.1155	5.57025	10.9044	5.57943	11.0578	-0.0412602	-0.338837	0.0972002	2.02843	2.12047	-0.281662	-0.790277	-0.181822	0.2813	0.674726	0.33574	0.358247	-1.29453	-0.843469	-1.29375	-0.830493
ARC	81.2997	0.421308	0.111736	4.05986	4.91023e-05	0.018695	22.79	212.847	154.199	173.563	40.4404	44.5453	110.208	72.2397	62.1643	40.6151	62.1234	122.887	29.708	20.5972	61.3737	70.4937	-1.01881	2.29059	1.26938	1.60655	-0.71147	-0.639993	0.503374	-0.157757	-0.333198	-0.708428	-0.33391	0.724142	-0.89835	-1.05699	-0.346965	-0.188162
KLF9	4321.11	0.438303	0.110826	4.04292	5.27895e-05	0.019668	1752.43	9350.99	6906.26	6711.1	1863.94	2223.21	3435.67	4929.02	4487.93	4289.71	4750.61	5520.93	1671.07	2287.5	4033.92	4923.5	-1.19643	2.34279	1.20409	1.11319	-1.14449	-0.977147	-0.412415	0.28315	0.0777005	-0.0146284	0.20005	0.558844	-1.23432	-0.947206	-0.133765	0.280576
TCTEX1D4	223.48	0.426407	0.113788	4.03649	5.42568e-05	0.019668	134.341	319.27	195.586	265.658	273.892	199.779	335.75	408.69	242.606	274.152	309.886	153.384	168.964	69.0611	112.704	111.961	-0.93434	1.00405	-0.292382	0.442095	0.528406	-0.248434	1.17679	1.94133	0.200471	0.531133	0.905691	-0.734735	-0.571428	-1.61859	-1.16113	-1.16893
WEE1	1842.6	0.412934	0.102927	4.03509	5.45819e-05	0.019668	1517.34	2050.6	1576.04	2305.91	1766.51	1680.57	2447.64	2351.14	2068.48	2215.13	2658.15	1557.16	1465.9	1333.97	1208.5	1278.56	-0.70993	0.453982	-0.581808	1.01123	-0.166073	-0.353645	1.32058	1.10994	0.493002	0.813088	1.78004	-0.623002	-0.822186	-1.11015	-1.38399	-1.23108
HES1	2077.84	0.426284	0.115039	4.02319	5.74155e-05	0.0203261	931.992	5061.6	4132.67	4314.28	737.119	1198.67	1937.61	1524.39	1543.1	1239.83	1764.3	3108.94	877.314	364.691	2055.46	2453.46	-0.824037	2.14577	1.47773	1.60833	-0.96418	-0.632253	-0.100845	-0.398012	-0.384555	-0.602655	-0.225479	0.741517	-0.863358	-1.23201	-0.0160946	0.270124
MYC	1674.59	0.399803	0.101051	4.00487	6.20522e-05	0.0215888	1167.09	3034.37	2507.91	2427.52	1031.23	1262.12	1572.39	1456.83	1315.9	1468.56	1676.6	2385.08	1085.27	711.208	1884.73	1806.57	-0.800912	2.14595	1.31512	1.18825	-1.01532	-0.650943	-0.161285	-0.343646	-0.56606	-0.325146	0.0031804	1.12127	-0.930035	-1.52037	0.331642	0.208297
ZBTB10	637.482	0.341833	0.0856175	3.99574	6.44933e-05	0.0220578	548.16	670.987	618.799	848.923	674.62	660.08	767.612	732.431	693.71	656.789	630.735	638.652	477.185	505.236	565.754	510.042	-0.892784	0.334881	-0.186735	2.11337	0.371193	0.225869	1.30066	0.949019	0.561997	0.192977	-0.0674369	0.0116903	-1.60219	-1.32181	-0.716932	-1.27377
KCNE4	268.662	0.440673	0.111882	3.95039	7.80251e-05	0.0262411	243.493	240.102	232.3	153.491	310.656	356.362	404.951	413.372	374.086	374.621	381.511	129.166	241.377	250.801	80.3437	111.961	-0.22936	-0.260268	-0.331363	-1.04954	0.382687	0.799205	1.24199	1.31873	0.96072	0.965596	1.02838	-1.27122	-0.248643	-0.162769	-1.71613	-1.42801
NR4A3	370.597	0.389209	0.0990328	3.94345	8.03184e-05	0.0265696	123.546	826.728	565.397	638.759	139.703	126.887	169.157	420.061	409.294	319.577	410.014	555.232	114.19	265.34	429.616	416.051	-1.18064	2.17982	0.930935	1.28152	-1.10342	-1.16467	-0.962668	0.236384	0.184931	-0.243821	0.188373	0.882359	-1.22535	-0.503016	0.282046	0.21722
CCDC109B	306.708	0.288088	0.073012	3.93822	8.2089e-05	0.0267173	293.871	323.164	344.445	399.077	253.672	276.721	271.676	315.046	320.174	320.111	353.738	377.63	224.667	255.647	266.697	311.001	-0.269791	0.345834	0.793087	1.94125	-1.11464	-0.630234	-0.736262	0.175217	0.28299	0.281681	0.988391	1.49051	-1.72422	-1.07313	-0.840907	0.0902239
PACERR	62.7225	0.43981	0.115408	3.8619	0.00011251	0.0360371	52.7769	81.7643	54.0699	79.1069	82.719	68.8427	102.519	88.293	72.0666	70.0077	47.5061	54.716	34.3499	46.0407	24.5495	44.2313	-0.467175	0.894455	-0.40644	0.769627	0.9393	0.287487	1.86937	1.20113	0.438921	0.342207	-0.714759	-0.376091	-1.33275	-0.783594	-1.7931	-0.868587
IER2	13267.4	0.422213	0.115316	3.85082	0.000117722	0.0371174	11884.4	17957	10406.8	12867.3	11733.2	14851.1	28499	17600.4	14417.2	17373.7	15223.2	8602.07	11440.4	5665.43	6120.63	7636.81	-0.245621	0.832864	-0.508043	-0.071064	-0.272466	0.281266	2.70511	0.769534	0.204195	0.729262	0.347337	-0.828557	-0.324481	-1.3501	-1.26926	-0.999984
LOC101927780	22.2789	0.389089	0.106706	3.84288	0.000121599	0.0377498	14.3937	49.3182	36.0466	22.4333	12.8674	17.5481	30.7557	43.4776	23.1053	15.4979	28.5037	22.4246	7.427	8.48118	14.5065	9.6756	-0.632578	2.16918	1.10449	0.0123867	-0.755022	-0.379517	0.680041	1.70063	0.0662978	-0.543997	0.499373	0.0116863	-1.19147	-1.1069	-0.623528	-1.01108
C8orf4	376.488	0.335812	0.105701	3.80466	0.000141998	0.0434147	121.147	288.122	905.169	1312.94	191.173	134.986	78.1708	131.102	256.909	382.103	475.061	772.302	29.708	118.737	383.864	442.313	-0.728432	-0.252089	1.50821	2.67149	-0.528664	-0.688953	-0.851034	-0.700033	-0.341132	0.0160183	0.281209	1.12917	-0.989288	-0.735309	0.0210438	0.187785
CXCL8	40089.1	0.405108	0.114191	3.7797	0.000157019	0.0472909	15713.1	51342.8	84112	98919.1	17218.4	16557.3	19321	20767.6	26665.2	26462.9	38637.8	84792.7	10441.4	9885.42	61735.2	58853.9	-0.828663	0.38257	1.49656	1.99993	-0.77749	-0.799963	-0.706013	-0.656836	-0.456347	-0.463224	-0.0493368	1.5197	-1.00787	-1.02678	0.73586	0.63791
TMEM123	1601.37	0.209304	0.0554611	3.77235	0.00016172	0.0479905	1543.72	1980.51	1784.97	1798.21	1509.16	1540.19	1591.61	1606.67	1500.2	1709.04	1639.33	1664.8	1430.63	1416.36	1455.11	1451.34	-0.368773	2.42568	1.17467	1.25933	-0.589883	-0.3914	-0.0624132	0.0339099	-0.647257	0.688883	0.242867	0.405838	-1.09234	-1.18362	-0.935672	-0.959817
SEC61G	944.819	0.295631	0.0790849	3.73907	0.000184705	0.054017	890.01	1223.87	1151.49	1354.26	908.071	859.859	1043.13	963.866	753.123	833.679	860.226	1032.43	766.837	703.938	826.871	945.444	-0.307234	1.56423	1.15849	2.29516	-0.205992	-0.476248	0.551099	0.106766	-1.07456	-0.623001	-0.474189	0.491092	-0.997684	-1.35027	-0.661164	0.00350544
BTG2	252.277	0.405882	0.112382	3.72832	0.000192761	0.0555675	119.947	275.144	310.401	336.5	113.968	170.082	151.216	268.224	424.148	416.839	442.172	264.61	60.3444	189.009	224.293	269.535	-1.14712	0.198222	0.503856	0.730095	-1.19895	-0.712518	-0.876063	0.138235	1.48988	1.42653	1.64613	0.10691	-1.66379	-0.548445	-0.242584	0.1496
OTUD1	443.554	0.407334	0.114949	3.61743	0.000297546	0.0845661	295.071	988.959	617.464	811.141	253.672	329.365	534.381	432.101	328.976	375.156	383.703	551.644	307.292	224.146	311.332	352.468	-0.703662	2.58467	0.824157	1.74199	-0.899852	-0.541142	0.430426	-0.054279	-0.542987	-0.324142	-0.283634	0.512237	-0.645746	-1.03978	-0.626601	-0.431656
DNAAF2	598.357	0.404577	0.115323	3.60405	0.000313302	0.0866248	468.995	1135.62	542.034	720.227	577.195	502.147	831.687	790.624	533.623	765.274	665.086	505.001	474.399	354.998	299.057	407.757	-0.611986	2.54164	-0.266455	0.576536	-0.100114	-0.45515	1.10382	0.909567	-0.306245	0.789645	0.315676	-0.441646	-0.586416	-1.15128	-1.41592	-0.901684
GREM2	464.354	-0.314824	0.0875386	-3.60398	0.000313376	0.0866248	616.53	99.9342	89.4489	74.3841	658.076	650.631	563.855	642.8	672.805	680.838	593.461	81.6254	837.394	989.875	88.1549	89.8449	0.47913	-1.14738	-1.18039	-1.22783	0.609938	0.586498	0.313283	0.561841	0.656312	0.681604	0.406497	-1.20503	1.17452	1.65461	-1.18447	-1.17915
IL6	10023.6	0.356193	0.115216	3.5938	0.000325896	0.0888683	911.601	14188.1	24713.3	28234.1	814.323	845.011	850.909	3888.91	5293.32	5221.18	8789.36	25982.9	324.003	1930.07	17843	20546.8	-0.890157	0.406836	1.43506	1.77901	-0.89966	-0.896663	-0.896086	-0.599301	-0.462102	-0.469149	-0.120569	1.55909	-0.94756	-0.790661	0.763891	1.02803
KLHL15	716.469	0.394419	0.111927	3.57825	0.000345904	0.0930666	604.535	673.582	1076.06	1447.54	656.238	665.48	585.641	449.492	660.152	761.534	830.992	933.759	473.471	399.827	591.419	653.794	-0.429846	-0.164693	1.38088	2.80743	-0.2313	-0.195809	-0.502405	-1.02524	-0.216269	0.173054	0.439785	0.834429	-0.933154	-1.21596	-0.480214	-0.240683
SAT1	2436.42	0.390389	0.111315	3.55981	0.000371117	0.0985364	1266.65	2469.8	3166.76	5191.54	1681.95	1487.54	1903.01	2651.47	3026.25	3021.02	3080.59	2734	946.014	2429.25	1772.03	2154.89	-1.16094	0.0331278	0.724821	2.73431	-0.748772	-0.941715	-0.529383	0.21342	0.58537	0.580181	0.639303	0.295334	-1.47916	-0.00711524	-0.65938	-0.279402
MZF1-AS1	87.6965	0.40003	0.115305	3.5177	0.000435309	0.114079	76.7664	109.019	88.1138	151.13	99.2628	59.3937	99.9562	116.386	77.0177	117.036	92.8197	90.5953	77.9835	46.0407	49.0989	52.5247	-0.385282	0.751613	0.0147109	2.23599	0.407708	-0.997661	0.432147	1.0113	-0.376423	1.03419	0.180589	0.10218	-0.34238	-1.46835	-1.36055	-1.23979
KLF2	1301.11	0.370323	0.11458	3.50394	0.000458426	0.118597	519.372	3023.98	1457.88	2812.43	582.71	724.873	1031.6	1472.22	1302.15	1287.39	1433.22	1610.08	555.168	312.592	1374.77	1317.26	-1.03905	2.28998	0.208382	2.00879	-0.954868	-0.765909	-0.358221	0.227436	0.00138564	-0.0182287	0.175604	0.410681	-0.991475	-1.3139	0.0979107	0.0214752
ADM	1207.37	0.390186	0.115387	3.48607	0.000490166	0.1244	1167.09	865.664	568.067	880.802	1240.79	1395.75	2209.29	2080.24	1756	1991.21	1976.25	384.806	1367.5	768.153	312.448	353.851	-0.0618251	-0.524472	-0.981244	-0.501237	0.0512899	0.289143	1.53781	1.33974	0.842082	1.20309	1.18014	-1.26253	0.245773	-0.674139	-1.37359	-1.31004
SIK1	437.149	0.355932	0.103826	3.48443	0.000493186	0.1244	121.147	1210.89	1009.3	871.357	119.483	120.137	170.438	212.706	209.048	257.051	282.113	736.423	85.4105	163.566	728.673	696.643	-0.847319	2.07469	1.53416	1.16427	-0.851781	-0.850026	-0.715151	-0.601816	-0.611624	-0.48291	-0.415709	0.802463	-0.943142	-0.733579	0.781682	0.695799
CFAP69	61.7542	0.391786	0.114976	3.46182	0.000536536	0.133136	25.189	114.211	132.171	184.189	22.0584	26.9971	16.6594	40.1332	37.4086	38.4775	36.5432	105.844	12.9972	14.5392	106.009	74.6403	-0.71015	1.01878	1.36759	2.37787	-0.77095	-0.675032	-0.875807	-0.419911	-0.472827	-0.452067	-0.489634	0.856289	-0.946931	-0.916985	0.859495	0.250269
NR4A1	5125.52	0.372314	0.11082	3.45958	0.000541014	0.133136	2450.53	7562.55	7278.74	4908.17	2222.38	2930.54	4299.4	6363.12	7771.09	7343.86	7588.56	5388.18	1521.61	4427.18	4961.22	4991.23	-1.28686	1.17238	1.03585	-0.104561	-1.39661	-1.05594	-0.397423	0.59537	1.2727	1.06717	1.18489	0.126355	-1.73373	-0.335952	-0.0790379	-0.0646044
CFAP20	531.402	0.265648	0.0769592	3.44931	0.000562029	0.136641	518.173	558.074	625.475	720.227	496.314	481.899	424.173	486.949	530.322	569.681	571.535	672.737	442.835	424.059	486.526	493.456	-0.155605	0.313722	1.10651	2.22101	-0.412714	-0.582269	-1.26126	-0.522865	-0.0127057	0.450241	0.472056	1.66242	-1.04175	-1.2626	-0.527847	-0.446337
STARD4	780.125	0.309213	0.0908322	3.42809	0.000607843	0.14602	570.95	1034.38	1303.02	1374.33	606.606	541.293	451.084	488.287	631.545	624.19	667.278	1323.05	345.355	504.025	1031.08	985.529	-0.614195	0.74657	1.53535	1.74476	-0.509498	-0.701276	-0.966152	-0.856914	-0.436271	-0.457866	-0.331349	1.59417	-1.2766	-0.810705	0.736862	0.603119
HAS2-AS1	709.63	0.300023	0.0884078	3.41956	0.000627217	0.148901	498.981	1257.61	1085.4	1196.05	645.209	471.1	650.997	527.083	404.893	426.459	461.175	1068.31	379.705	348.94	956.313	975.853	-0.654373	1.70229	1.16733	1.51105	-0.200123	-0.740986	-0.182143	-0.567078	-0.946656	-0.879663	-0.771818	1.11422	-1.0249	-1.12047	0.766315	0.827015
MIRLET7BHG	360.332	-0.387186	0.113267	-3.40797	0.000654474	0.153566	411.42	188.188	104.802	127.516	490.8	396.858	615.115	542.467	397.191	284.306	292.345	128.269	832.752	523.41	214.25	215.628	0.250106	-0.842756	-1.25098	-1.13978	0.638721	0.178817	1.24732	0.891665	0.180449	-0.372197	-0.332839	-1.1361	2.31279	0.79837	-0.715165	-0.70842
ACTG1P20	32.9075	-0.381422	0.113355	-3.39129	0.000695654	0.156435	31.1863	24.6591	24.031	21.2526	36.764	22.9476	34.6002	34.7821	33.5577	27.2549	32.158	28.7035	51.0606	42.4059	47.9831	33.1735	-0.200644	-0.961553	-1.03477	-1.35866	0.44957	-1.16107	0.197326	0.21853	0.075798	-0.65895	-0.0873739	-0.490085	2.11618	1.10727	1.75742	0.0310067
CHMP1B	3657.6	0.312755	0.0922297	3.39944	0.000675246	0.156435	1992.33	4988.92	4654.68	5689.79	2303.27	2121.98	2643.71	4458.8	4097.89	4700.67	4432.69	4046.29	1677.57	4143.66	2862.25	3707.14	-1.36402	1.09048	0.816706	1.66457	-1.10933	-1.25783	-0.830476	0.656258	0.360641	0.854373	0.634871	0.318374	-1.62184	0.398133	-0.651476	0.0405744
LRP1-AS	4.80799	-0.280696	0.0747661	-3.39324	0.00069072	0.156435	2.39895	0	0	2.3614	3.6764	1.34986	5.12596	8.02664	5.50127	2.13764	1.46173	2.69095	5.57025	23.0204	6.69531	6.91114	-0.442159	-0.882465	-0.882465	-0.44905	-0.207693	-0.63471	0.0583601	0.590755	0.127245	-0.49012	-0.614178	-0.388565	0.139906	3.34272	0.346401	0.386016
TSC22D3	343.919	0.378529	0.113676	3.39048	0.000697714	0.156435	141.538	591.818	429.889	755.648	273.892	191.68	269.113	290.297	311.922	416.839	401.975	400.951	149.468	230.204	339.229	308.237	-1.27005	1.55571	0.539511	2.58384	-0.439458	-0.955386	-0.46945	-0.336508	-0.200799	0.457619	0.364336	0.357912	-1.22029	-0.713627	-0.0294303	-0.223923
EGR3	556.325	0.328941	0.098395	3.3739	0.00074111	0.164339	419.816	859.175	770.996	733.215	389.699	398.208	547.196	553.838	664.553	553.114	539.377	583.936	336.072	328.343	623.78	599.887	-0.880809	1.9541	1.38514	1.14136	-1.07514	-1.02023	-0.0589057	-0.016048	0.698326	-0.0207206	-0.109355	0.178154	-1.42116	-1.47103	0.435242	0.281079
ZSWIM8-AS1	122.302	-0.343638	0.103211	-3.3311	0.000865043	0.189736	112.751	102.53	108.14	95.6367	123.159	121.487	93.5487	88.293	122.678	108.485	110.36	144.414	119.76	168.412	174.078	163.103	-0.357978	-0.741029	-0.530785	-0.999372	0.032125	-0.0305501	-1.07763	-1.2746	0.0140888	-0.517839	-0.447558	0.828711	-0.0952676	1.7281	1.94045	1.52913
TEX14	10.3073	0.240534	0.0835928	3.32547	0.000882709	0.191529	1.19947	19.4677	11.348	48.4087	1.8382	2.69971	12.8149	8.69553	11.0025	4.27528	10.2321	18.8366	0.928375	1.2116	7.8112	4.14669	-0.772949	0.777413	0.0883213	3.23354	-0.718743	-0.645629	0.212812	-0.136785	0.0590029	-0.511916	-0.00638185	0.723857	-0.795957	-0.77192	-0.211835	-0.522829
POLR3GL	191.107	0.28593	0.0868585	3.27818	0.0010448	0.224287	175.123	158.337	192.916	210.165	165.438	222.726	207.601	248.157	218.95	240.484	226.568	167.736	155.967	179.316	141.717	146.516	-0.46532	-0.953981	0.0526471	0.554779	-0.747268	0.92047	0.480157	1.66078	0.810544	1.43742	1.03229	-0.680379	-1.02299	-0.343251	-1.43781	-1.29811
RNA5S16	159.316	0.0062202	0.0158846	-3.26875	0.00108023	0.229452	0	0	0	0	1406.22	0	988.028	0	0	0	0	0	0	0	0	154.81	-0.384778	-0.384778	-0.384778	-0.384778	3.01151	-0.384778	2.00149	-0.384778	-0.384778	-0.384778	-0.384778	-0.384778	-0.384778	-0.384778	-0.384778	-0.0108846
PNRC1	1441.44	0.332239	0.102607	3.26099	0.00111026	0.233374	750.871	2247.87	1903.13	1813.56	702.193	1015.09	1105.93	2096.29	1991.46	1701.56	1699.26	1406.47	721.347	1198.27	1254.25	1455.49	-1.37215	1.60237	0.917365	0.739391	-1.46887	-0.847146	-0.666662	1.30118	1.09288	0.516857	0.512282	-0.0694851	-1.43081	-0.483174	-0.371933	0.0279124
C8orf44-SGK3	5.89578	0.0635214	0.040397	3.24721	0.00116542	0.23613	8.39632	0	6.00776	24.7947	0	0	17.9408	3.34443	9.35215	20.842	3.65432	0	0	0	0	0	0.301253	-0.710294	0.0134908	2.27685	-0.710294	-0.710294	1.45113	-0.307374	0.416406	1.80064	-0.27004	-0.710294	-0.710294	-0.710294	-0.710294	-0.710294
DUOX1	13.0706	-0.367149	0.109965	-3.24742	0.00116456	0.23613	9.5958	14.2763	8.67788	14.1684	20.2202	12.1487	5.12596	7.35775	8.80202	7.48173	5.84691	13.4547	25.0661	19.3856	22.3177	15.2045	-0.570046	0.197789	-0.72063	0.180086	1.17288	-0.151242	-1.30332	-0.937196	-0.700264	-0.916857	-1.18505	0.0630109	1.96785	1.03596	1.51697	0.35006
INHBA	9402.4	0.267281	0.0834118	3.24147	0.00118916	0.23613	1396.19	19877.8	21556.5	25873.9	1503.65	1286.41	1821	3943.09	3863.54	3699.72	4622.71	21524	1226.38	3264.04	16420.2	18559.2	-0.867033	1.13444	1.31623	1.78378	-0.855396	-0.878921	-0.821029	-0.591217	-0.599831	-0.617572	-0.517617	1.31271	-0.885423	-0.664754	0.759999	0.991635
NLGN3	25.6435	-0.371716	0.115281	-3.24481	0.00117528	0.23613	16.7926	10.3828	11.348	14.1684	22.0584	12.1487	15.3779	41.471	45.6605	43.8216	37.274	5.3819	25.0661	75.1191	24.5495	9.6756	-0.476313	-0.821262	-0.769319	-0.617537	-0.192933	-0.726228	-0.552449	0.851762	1.07722	0.978261	0.625902	-1.09039	-0.0310723	2.66255	-0.0588757	-0.859319
PPP1R15B	2535.54	0.246521	0.075923	3.25425	0.00113692	0.23613	2410.94	2528.21	2628.73	2916.33	2431.94	2456.74	2229.79	2551.13	2646.11	3234.25	3089.36	2646.1	2009.93	1945.83	2490.66	2352.55	-0.363857	-0.0214107	0.272155	1.11205	-0.302541	-0.230115	-0.892886	0.0455467	0.322908	2.04048	1.61736	0.322881	-1.53496	-1.72217	-0.13107	-0.534378
TRIM36	11.3165	0.286151	0.0940745	3.24041	0.00119358	0.23613	14.3937	29.8505	10.6805	14.1684	11.0292	16.1983	20.5038	16.7222	12.1028	6.94732	5.84691	6.27888	6.49862	4.84639	2.23177	2.76446	0.42274	2.54615	-0.0873739	0.39179	-0.0394648	0.670651	1.26214	0.74262	0.108021	-0.600224	-0.751396	-0.692053	-0.661865	-0.888845	-1.24803	-1.17486
LIMS1	2435.63	0.273123	0.0847907	3.23148	0.0012315	0.241267	1795.61	3783.22	3112.69	3551.55	1891.51	1888.45	2296.43	2673.54	1966.7	2334.84	2109.27	2881.11	1477.97	1953.1	2529.71	2724.37	-0.981513	2.06664	1.03832	1.71134	-0.83445	-0.839141	-0.213475	0.364854	-0.719135	-0.154575	-0.500494	0.683177	-1.46864	-0.740003	0.144282	0.44281
GADD45B	1181.83	0.364142	0.114869	3.22556	0.00125726	0.243944	800.049	1565.2	1348.41	1683.68	897.042	996.195	1632.62	1606.67	1598.67	1270.29	1309.71	977.711	1061.13	816.617	629.359	715.994	-1.05047	1.05483	0.458325	1.38081	-0.783594	-0.510779	1.24031	1.16891	1.1469	0.243388	0.35184	-0.561635	-0.332106	-1.00488	-1.52011	-1.28174
NNAT	48.6339	-0.356561	0.11157	-3.21665	0.00129695	0.249249	68.37	22.0634	22.696	20.0719	69.8516	60.7436	60.23	35.451	55.5628	57.1818	54.0839	18.8366	90.0523	86.0234	27.8971	29.0268	0.831251	-1.1191	-1.09246	-1.20298	0.893653	0.510038	0.488407	-0.555241	0.291832	0.360023	0.229544	-1.25501	1.74447	1.57478	-0.873396	-0.825816
RASL11A	173.659	0.36631	0.114801	3.20622	0.00134491	0.25532	137.94	118.104	156.869	216.068	108.454	153.884	94.8302	244.812	354.832	276.29	317.195	143.517	120.689	196.279	61.3737	77.4048	-0.412596	-0.641718	-0.193937	0.489874	-0.753189	-0.228424	-0.910557	0.821903	2.09275	1.1855	1.658	-0.348168	-0.611863	0.261286	-1.29702	-1.11184
TGIF1	1402.42	0.147407	0.0460057	3.20431	0.00135384	0.25532	1133.5	1583.37	1712.88	1619.92	1053.29	1051.54	1136.68	1488.94	1504.6	1532.69	1630.56	1656.73	963.653	1417.57	1417.17	1535.66	-1.08192	0.728008	1.24904	0.875047	-1.40464	-1.41168	-1.06913	0.348089	0.411071	0.524085	0.917837	1.02313	-1.76526	0.0609422	0.0593523	0.536032
CTGF	12722.2	0.324945	0.10346	3.19502	0.00139819	0.261241	6850.2	25195.1	17568	15783.6	7738.83	7553.8	9235.69	16082	11112.6	12089.4	13846.9	16099	5149.69	8750.16	13455.3	17044.3	-1.12881	2.39777	0.931557	0.588522	-0.957986	-0.993555	-0.670232	0.645894	-0.309428	-0.121639	0.216223	0.649163	-1.45571	-0.76357	0.140943	0.830869
CCNL1	1116.19	0.336599	0.106119	3.18993	0.00142309	0.263454	971.574	1114.85	905.837	1321.2	1113.95	1094.73	1582.64	1451.48	1369.26	1360.61	1376.22	865.588	1118.69	751.191	699.66	761.608	-0.528236	-0.00490634	-0.768348	0.748818	-0.0081959	-0.0783827	1.70374	1.22468	0.924368	0.892743	0.949757	-0.91536	0.00912353	-1.33321	-1.52143	-1.29516
LOC646471	112.548	-0.314885	0.0993831	-3.18072	0.00146909	0.269497	87.5616	83.0622	91.4515	97.9981	132.35	110.688	115.334	141.804	112.226	101.538	98.6666	87.9043	150.397	138.122	132.79	118.872	-1.16775	-1.37804	-0.985955	-0.679993	0.925491	-0.0869077	0.130215	1.36731	-0.0150504	-0.514562	-0.648752	-1.15173	1.7689	1.19523	0.946048	0.295549
GALNT12	898.698	0.341265	0.110136	3.17537	0.00149646	0.272045	411.42	2028.53	1426.51	1844.25	397.051	291.569	640.745	718.384	645.849	529.065	702.36	1544.6	242.306	501.601	1169.45	1285.47	-0.854859	1.98213	0.925968	1.65884	-0.880066	-1.06512	-0.452542	-0.316335	-0.443588	-0.648467	-0.344447	1.13315	-1.15154	-0.696648	0.47499	0.678539
MMP3	1646.86	-0.340977	0.108808	-3.16173	0.00156837	0.282573	2041.51	667.093	806.375	760.371	1716.88	2204.32	2597.58	1537.1	1738.4	1601.09	2004.03	882.631	3811.91	1450.28	1392.62	1137.57	0.493007	-1.22396	-1.04997	-1.10744	0.0874714	0.696397	1.18767	-0.137115	0.114355	-0.0571762	0.446188	-0.954704	2.70466	-0.245572	-0.317601	-0.636219
RNF144A	38.069	0.370674	0.115394	3.13548	0.00171576	0.306391	74.3674	15.5742	4.6727	3.5421	71.6898	74.2421	79.4523	51.5043	44.5602	52.3721	52.6222	2.69095	41.7769	33.9247	3.34766	2.76446	1.24964	-0.774428	-1.14973	-1.18865	1.15746	1.24533	1.4247	0.462534	0.223473	0.492412	0.50102	-1.21796	0.12765	-0.142675	-1.19535	-1.21543
ZNF16	116.66	-0.298332	0.0955744	-3.13215	0.00173533	0.307169	134.341	109.019	102.799	77.9262	106.616	106.639	107.645	123.744	133.681	100.469	117.669	92.3892	138.328	161.142	133.906	120.254	0.862956	-0.372959	-0.676527	-1.89054	-0.490267	-0.489142	-0.440023	0.345732	0.830723	-0.790273	0.0492242	-1.18463	1.05754	2.17107	0.841727	0.175387
PELI1	608.687	0.256568	0.0826914	3.11723	0.00182562	0.319667	320.26	874.749	956.569	1035.47	362.126	330.715	389.573	465.545	523.72	589.988	627.081	952.596	302.65	378.018	855.884	774.048	-1.10326	1.0177	1.33067	1.63249	-0.943116	-1.06326	-0.838129	-0.547529	-0.325004	-0.0715254	0.070357	1.31548	-1.17061	-0.882325	0.945545	0.632517
TMEM191B	17.6106	-0.148875	0.0665683	-3.11529	0.00183762	0.319667	0	48.0203	30.0388	11.807	0	0	0	24.0799	8.2519	10.1538	6.57777	26.9095	31.5647	15.7508	36.8242	31.7913	-1.15041	1.9865	0.811867	-0.37912	-1.15041	-1.15041	-1.15041	0.422605	-0.611356	-0.487116	-0.720718	0.607445	0.911548	-0.121494	1.25512	0.926346
HTR7	596.196	-0.261661	0.0845473	-3.10335	0.00191345	0.330014	490.585	533.415	601.444	484.087	492.638	430.604	395.98	652.164	723.966	704.886	650.468	577.657	540.314	680.918	746.527	833.484	-0.853465	-0.507347	0.0424065	-0.905977	-0.836876	-1.33818	-1.61799	0.452291	1.03254	0.878346	0.438586	-0.149819	-0.451595	0.684653	1.21485	1.91757
KRTAP2-3	12.5226	0.276403	0.0927444	3.08639	0.00202604	0.34647	25.189	6.48923	3.33765	3.5421	7.3528	25.6473	24.3483	28.0932	14.3033	14.9635	27.7728	2.69095	12.9972	3.63479	0	0	1.19888	-0.571066	-0.869367	-0.850015	-0.489329	1.24226	1.11931	1.47377	0.168541	0.231027	1.44344	-0.930577	0.0449225	-0.841241	-1.18528	-1.18528
AOC2	29.2866	-0.351496	0.114855	-3.07522	0.0021035	0.350798	33.5853	22.0634	21.3609	16.5298	40.4404	37.796	38.4447	21.4044	18.1542	26.7205	27.0419	15.2487	49.2039	43.6175	33.4766	23.4979	0.41303	-0.694033	-0.761528	-1.22572	1.0717	0.817611	0.879938	-0.757355	-1.06964	-0.246564	-0.215676	-1.34881	1.91372	1.37696	0.402583	-0.556202
CCBE1	958.385	0.263533	0.0852513	3.07619	0.00209668	0.350798	1896.37	354.312	303.058	357.752	2018.34	1895.2	2488.65	715.04	635.946	623.656	715.515	362.381	1960.73	484.639	254.422	268.152	1.19327	-0.768483	-0.833687	-0.764107	1.34845	1.19179	1.94676	-0.309577	-0.410197	-0.425833	-0.308972	-0.758218	1.27515	-0.602686	-0.895561	-0.878093
SCN3B	11.3916	0.325346	0.106154	3.07959	0.00207285	0.350798	5.99737	25.9569	19.3583	27.1561	9.191	5.39943	7.68894	10.7022	7.15164	8.55055	10.963	17.0427	2.78512	2.4232	6.69531	15.2045	-0.713474	1.92648	1.05372	2.08509	-0.291068	-0.792561	-0.489739	-0.0911912	-0.560804	-0.375777	-0.0567008	0.747435	-1.13834	-1.18621	-0.621161	0.50431
SNORA8	24.5818	-0.312778	0.0940443	-3.06128	0.0022039	0.364528	17.9921	41.5311	9.34541	7.0842	7.3528	25.6473	17.9408	26.0866	20.9048	17.6355	4.38518	14.3517	27.8512	53.3103	47.9831	53.9069	-0.401966	1.03389	-0.929409	-1.06734	-1.05096	0.0649927	-0.405094	0.091789	-0.224295	-0.423719	-1.23198	-0.624027	0.199432	1.75241	1.42746	1.78881
LOC100128239	7.84383	0.278102	0.0940073	3.04253	0.00234597	0.380119	1.19947	6.48923	13.3506	17.7105	5.5146	1.34986	5.12596	6.68887	14.8534	13.3602	13.1555	13.4547	0.928375	1.2116	5.57943	5.52891	-1.18507	-0.241602	0.982165	1.75979	-0.415434	-1.15824	-0.484751	-0.205996	1.25021	0.983888	0.947379	1.00074	-1.23342	-1.1829	-0.403872	-0.412881
NR4A2	1406.44	0.296872	0.0976844	3.04142	0.00235467	0.380119	887.611	911.088	1432.52	1427.47	801.456	876.057	750.953	1868.87	2703.87	2366.9	2811.63	1264.75	657.289	1852.53	981.979	908.124	-0.729104	-0.696112	0.0366415	0.0295434	-0.850177	-0.745341	-0.921148	0.649838	1.82325	1.34971	1.97468	-0.199125	-1.05277	0.626881	-0.596491	-0.700278
PPM1N	29.6456	0.279591	0.101131	3.04605	0.00231873	0.380119	15.5932	37.6376	22.0285	25.9754	33.0876	21.5977	33.3187	67.5575	44.5602	49.1657	52.6222	18.8366	32.4931	8.48118	4.46354	6.91114	-0.792561	0.450747	-0.429609	-0.207001	0.194129	-0.453903	0.207164	2.13824	0.841188	1.10094	1.29588	-0.609628	0.160599	-1.19368	-1.42027	-1.28223
ADGRD1	31.1586	0.318145	0.111004	3.02056	0.00252304	0.395376	7.19685	81.7643	66.7529	97.9981	3.6764	9.449	21.7853	11.3711	6.60152	6.41291	8.77036	76.2435	1.85675	4.84639	41.2877	52.5247	-0.723904	1.52884	1.07533	2.01927	-0.83026	-0.655865	-0.283175	-0.597798	-0.74189	-0.747588	-0.676367	1.36205	-0.885233	-0.794914	0.306009	0.645486
FCGR1B	5.48679	0.206254	0.0756837	3.0241	0.00249376	0.395376	3.59842	5.19139	7.34282	24.7947	5.5146	8.09914	3.84447	4.68221	8.2519	6.94732	2.19259	2.69095	0.928375	1.2116	1.11589	1.38223	-0.329215	-0.0514997	0.323578	3.36611	0.00484929	0.455434	-0.28632	-0.14027	0.482065	0.254628	-0.574306	-0.487423	-0.794707	-0.745331	-0.762017	-0.715583
GADD45A	1066.92	0.338225	0.115297	3.02002	0.00252755	0.395376	758.068	2090.83	1340.4	1396.77	773.883	847.71	1672.34	1345.13	855.997	858.262	871.92	1151.73	799.331	525.833	830.218	952.356	-0.760809	2.52221	0.673656	0.812512	-0.721853	-0.539992	1.49134	0.685313	-0.519579	-0.514	-0.480355	0.208895	-0.659166	-1.33288	-0.58308	-0.282217
MB21D2	686.811	0.225338	0.0748884	3.02505	0.00248593	0.395376	370.638	1182.34	1443.2	1253.9	330.876	288.869	385.728	371.232	421.947	397.601	439.98	1289.86	296.152	323.497	1050.05	1143.1	-0.716891	1.12356	1.71503	1.28583	-0.807046	-0.902292	-0.682674	-0.715543	-0.600552	-0.655755	-0.559664	1.36736	-0.885781	-0.823778	0.823604	1.0346
MAP3K8	381.861	0.303632	0.102578	3.00602	0.00264693	0.410865	103.155	812.452	702.908	654.108	113.968	144.435	181.971	380.596	365.834	294.46	322.311	572.275	84.4821	241.108	557.943	577.772	-1.18219	1.82644	1.36179	1.15479	-1.13632	-1.00709	-0.847873	-0.00536431	-0.0679817	-0.370731	-0.252595	0.80768	-1.26139	-0.597033	0.746885	0.830994
ARRDC3-AS1	76.2314	0.302786	0.107871	2.99511	0.00274347	0.416245	43.1811	136.274	51.3997	48.4087	123.159	64.7931	157.623	125.751	88.5704	82.8335	89.1653	43.9522	59.416	42.4059	32.3607	30.409	-0.820226	1.4901	-0.61626	-0.69049	1.16464	-0.283869	2.01994	1.22894	0.306221	0.163846	0.320987	-0.80109	-0.417317	-0.839464	-1.08876	-1.1372
CSF1R	40.661	-0.33457	0.111271	-2.99632	0.00273263	0.416245	19.1916	55.8074	56.0724	48.4087	20.2202	22.9476	23.0668	24.0799	31.9073	22.9796	24.1185	63.6858	28.7796	29.0783	90.3867	89.8449	-0.893315	0.630226	0.641253	0.322374	-0.850515	-0.737033	-0.732072	-0.689918	-0.364228	-0.7357	-0.688312	0.958035	-0.494369	-0.481939	2.06903	2.04648
RUNX1	5522.7	0.229515	0.0768364	2.99519	0.00274274	0.416245	4196.96	8399.66	6774.09	7650.94	4885.94	4382.99	5627.02	5260.12	4491.23	4774.95	4767.42	6824.25	4320.66	3700.22	6169.73	6137.1	-0.981554	2.13005	0.926499	1.5757	-0.471449	-0.843825	0.077233	-0.194409	-0.763681	-0.553623	-0.559196	0.963636	-0.889973	-1.34933	0.479044	0.454883
CCL20	30.3872	0.278256	0.105247	2.99117	0.00277907	0.418498	17.9921	20.7655	45.392	33.0596	11.0292	21.5977	25.6298	38.1265	69.3159	37.4087	62.1234	32.2914	2.78512	10.9044	30.1289	27.6446	-0.697452	-0.541395	0.844298	0.150373	-1.08924	-0.49457	-0.267691	0.435482	2.19046	0.395089	1.78575	0.107147	-1.55313	-1.09627	-0.0145331	-0.154322
GXYLT2	338.825	0.218092	0.0731484	2.98198	0.00286393	0.421833	185.919	490.586	492.636	492.352	183.82	179.531	228.105	317.052	358.682	387.981	358.123	458.358	152.253	308.957	427.384	399.464	-1.26125	1.2518	1.26871	1.26636	-1.27856	-1.31394	-0.913275	-0.179595	0.163791	0.405463	0.159177	0.985966	-1.53894	-0.246365	0.730475	0.500178
LOC101926935	10.8011	0.295922	0.10169	2.98326	0.00285197	0.421833	2.39895	29.8505	19.3583	35.421	1.8382	6.74929	3.84447	8.69553	9.35215	7.48173	5.84691	16.1457	0.928375	2.4232	10.043	12.4401	-0.840335	1.90521	0.85585	2.46235	-0.896418	-0.405238	-0.695762	-0.210586	-0.144914	-0.331983	-0.495489	0.534538	-0.987413	-0.83791	-0.0758227	0.163921
PAQR5	653.138	-0.208327	0.0704359	-2.98572	0.00282915	0.421833	909.202	141.465	118.82	132.238	768.368	781.567	845.783	1015.37	1129.96	1021.79	996.167	121.093	972.937	1180.1	143.949	171.396	0.60159	-1.20211	-1.25531	-1.22379	0.270719	0.301729	0.452595	0.851018	1.12023	0.866104	0.805903	-1.24997	0.751327	1.23802	-1.19627	-1.13179
SPATA2	543.032	0.278446	0.0937692	2.97252	0.00295365	0.431897	465.396	534.713	739.622	637.578	470.579	453.552	374.195	511.698	656.851	646.101	683.357	689.78	414.055	428.906	541.204	440.931	-0.670144	-0.0718131	1.69693	0.816102	-0.625402	-0.77238	-1.45738	-0.270472	0.982464	0.889672	1.21126	1.2667	-1.11331	-0.985125	-0.0157806	-0.881323
PTCH2	80.9511	0.341456	0.115358	2.96555	0.00302147	0.438103	39.5827	85.6579	66.7529	87.3718	77.2044	55.3441	89.7042	129.764	119.928	112.226	141.788	78.0375	65.9146	77.5422	43.5195	24.8801	-1.2629	0.14369	-0.433443	0.196013	-0.114378	-0.781731	0.267218	1.49017	1.18988	0.954764	1.85722	-0.0889456	-0.459035	-0.104065	-1.14271	-1.71174
SLC6A7	15.2609	0.260837	0.0962533	2.96371	0.00303952	0.438103	2.39895	58.4031	42.7219	21.2526	0	4.04957	3.84447	8.69553	6.05139	10.1538	8.0395	35.8793	0	0	12.2747	30.409	-0.731212	2.45268	1.56118	0.340636	-0.867594	-0.637372	-0.649033	-0.373246	-0.523567	-0.290342	-0.410541	1.17218	-0.867594	-0.867594	-0.169764	0.861187
RGPD6	28.5221	-0.012669	0.0249454	-2.96004	0.00307602	0.439676	13.1942	0	0	0	0	14.8484	0	137.791	105.074	27.7893	0	0	0	37.5595	104.893	15.2045	-0.338141	-0.629213	-0.629213	-0.629213	-0.629213	-0.301649	-0.629213	2.41052	1.68878	-0.0161665	-0.629213	-0.629213	-0.629213	0.19937	1.68479	-0.293793
SRGAP2	2182.08	-0.131557	0.0444806	-2.95824	0.00309401	0.439676	2183.04	2097.32	2096.04	1957.6	2009.15	2190.82	2023.47	2217.36	2248.37	2216.2	2409.66	1988.61	2308.87	2591.61	2268.59	2106.52	0.00582704	-0.510715	-0.518421	-1.35262	-1.04198	0.0526742	-0.955705	0.2126	0.399446	0.205595	1.37133	-1.16576	0.764004	2.4677	0.521329	-0.455302
JADE1	1314.88	0.151957	0.0514228	2.9549	0.00312766	0.441351	1319.42	1445.8	1491.93	1473.51	1303.28	1275.62	1384.01	1123.73	1188.82	1288.46	1251.97	1575.1	1177.18	1164.35	1326.79	1248.15	0.0350816	1.01178	1.36826	1.22595	-0.0896342	-0.303472	0.534226	-1.47729	-0.974226	-0.204191	-0.486216	2.01106	-1.06422	-1.1634	0.0920034	-0.515712
TSHZ2	20.5517	0.32105	0.107345	2.95272	0.00314987	0.441398	50.3779	3.89354	3.33765	4.7228	68.0134	48.5949	44.8521	8.69553	20.3547	19.2387	15.3481	3.58793	30.6364	6.05799	1.11589	0	1.38939	-0.775984	-0.801879	-0.737355	2.2109	1.30633	1.13198	-0.552294	-0.00917879	-0.0611622	-0.242398	-0.79022	0.46977	-0.675158	-0.905375	-0.957356
MRPS15	539.859	0.179035	0.0606044	2.95019	0.00317583	0.441966	598.538	539.904	528.683	498.255	555.137	579.089	594.611	587.282	571.581	559.527	584.691	520.25	587.661	460.407	451.933	420.198	1.05104	0.000806582	-0.200186	-0.745201	0.273648	0.702673	0.980706	0.849437	0.568204	0.352283	0.803016	-0.351237	0.856221	-1.42314	-1.57491	-2.14336
WAC-AS1	534.823	-0.182685	0.0621289	-2.94326	0.00324775	0.448879	638.12	467.225	416.538	492.352	610.283	681.678	624.085	486.281	434.6	466.005	487.486	435.934	764.981	493.12	516.655	541.834	1.03121	-0.674838	-1.18084	-0.423994	0.75331	1.46605	0.891101	-0.484605	-1.00053	-0.687014	-0.472571	-0.987218	2.29766	-0.416324	-0.181378	0.0699824
CCDC80	7488.57	0.185006	0.0632715	2.9405	0.00327687	0.449823	3815.53	13475.5	13590.2	14772.9	3845.52	3883.54	4044.38	4012.65	4243.13	4293.98	4572.28	13770.5	2821.33	4330.25	12085	12260.4	-0.778158	1.26838	1.29268	1.54324	-0.771805	-0.76375	-0.729675	-0.736397	-0.687569	-0.676795	-0.617835	1.33086	-0.988786	-0.669111	0.973791	1.01094
UGCG	1864.96	0.281163	0.096662	2.93685	0.0033156	0.452064	1081.93	3328.98	2758.9	3282.35	1064.32	1025.89	1687.72	1513.02	1413.83	1363.28	1598.4	2854.2	1050.92	975.336	2415.89	2424.43	-0.92971	1.73825	1.06139	1.68288	-0.950616	-0.996241	-0.21044	-0.417864	-0.535641	-0.595656	-0.316494	1.17454	-0.966524	-1.05627	0.654128	0.664265
IL7	85.5558	0.332291	0.113848	2.9334	0.00335268	0.454052	122.346	32.4462	22.696	41.3245	101.101	156.583	142.245	129.095	133.131	128.258	122.785	35.8793	69.6281	66.6379	35.7083	29.0268	0.764809	-1.10405	-1.30674	-0.919486	0.323158	1.47653	1.17847	0.905102	0.988993	0.887706	0.773928	-1.03268	-0.331107	-0.393268	-1.03624	-1.17513
C9orf85	91.3392	0.293935	0.0997059	2.9244	0.00345118	0.455248	86.3622	99.9342	94.7891	109.805	106.616	90.4404	73.0449	92.9752	91.8711	105.279	108.168	107.638	78.9118	81.177	68.069	66.347	-0.34127	0.58935	0.236558	1.26619	1.04749	-0.0616276	-1.25442	0.112181	0.0364738	0.955815	1.15392	1.11759	-0.85213	-0.696808	-1.59561	-1.71369
CNTD1	8.52068	-0.313285	0.103823	-2.92856	0.00340536	0.455248	9.5958	5.19139	7.34282	5.9035	9.191	4.04957	6.40745	6.01998	6.60152	8.55055	9.50123	4.48491	20.4242	16.9624	7.8112	8.29337	0.246182	-0.762348	-0.269709	-0.599287	0.153492	-1.0238	-0.483892	-0.572615	-0.439453	0.00684017	0.224527	-0.924117	2.7257	1.93299	-0.162459	-0.0520496
GPRC5B	504.737	0.274594	0.0951174	2.92806	0.00341085	0.455248	236.296	1314.72	854.437	926.85	240.804	233.525	275.52	210.699	217.3	212.695	263.842	1027.94	166.179	178.105	810.133	906.742	-0.687528	2.07452	0.895651	1.08111	-0.675983	-0.694626	-0.587069	-0.753088	-0.736182	-0.747976	-0.616979	1.34003	-0.867112	-0.836568	0.782178	1.02961
VCAM1	228.763	0.312606	0.109497	2.92435	0.00345175	0.455248	58.7743	486.693	528.016	635.217	80.8808	112.038	64.0745	60.8687	61.6142	86.0399	58.4691	527.426	39.9201	59.3683	391.676	409.14	-0.77007	1.16845	1.35565	1.84128	-0.669925	-0.528778	-0.746059	-0.760582	-0.757205	-0.646553	-0.771452	1.35297	-0.855481	-0.767379	0.738011	0.817125
LINC00623	115.327	0.303856	0.104267	2.91984	0.00350207	0.458885	128.344	114.211	180.9	172.382	124.998	122.837	130.712	58.1931	85.2696	79.0926	72.3555	183.881	104.906	50.8871	110.473	125.783	0.321874	-0.0275956	1.62143	1.4108	0.239135	0.185709	0.38043	-1.41272	-0.74321	-0.895947	-1.06253	1.69514	-0.257658	-1.59338	-0.120022	0.25855
PANK1	151.959	0.286807	0.0982192	2.91665	0.00353812	0.460618	148.735	205.06	169.552	220.791	132.35	125.537	173.001	166.553	137.532	151.772	126.439	163.251	128.116	104.197	130.559	147.898	-0.10581	1.74269	0.57739	2.25896	-0.64352	-0.867137	0.690569	0.478946	-0.473483	-0.0061252	-0.837513	0.370584	-0.782499	-1.56746	-0.702328	-0.133259
GOLGA8T	3.4339	0.075009	0.0437519	2.90047	0.00372605	0.480083	5.99737	5.19139	9.34541	0	5.5146	16.1983	0	2.67555	0	3.74087	0	6.27888	0	0	0	0	0.55943	0.383539	1.29008	-0.749383	0.454075	2.78559	-0.749383	-0.165496	-0.749383	0.0669904	-0.749383	0.620864	-0.749383	-0.749383	-0.749383	-0.749383
OSTC	1721.69	0.209375	0.0722622	2.8997	0.00373522	0.480083	1239.06	2446.44	2407.11	2865.56	1251.81	1179.78	1378.88	1445.46	1522.75	1486.19	1664.91	2266.68	1222.67	1353.35	1933.83	1882.6	-0.923651	1.387	1.31173	2.18909	-0.899236	-1.0371	-0.656058	-0.528637	-0.380729	-0.450691	-0.108674	1.04297	-0.955013	-0.704912	0.405979	0.307931
FAM20A	31.9681	-0.332697	0.115372	-2.89269	0.00381955	0.484747	29.9869	18.1699	18.6908	35.421	20.2202	32.3966	32.0372	36.7888	37.4086	20.842	28.5037	26.0125	40.8485	39.9827	51.3307	42.8491	-0.206463	-1.43792	-1.38363	0.359833	-1.22425	0.0446549	0.00720763	0.502368	0.566963	-1.15946	-0.361027	-0.620634	0.925436	0.835214	2.0178	1.13392
NCOA7	1661.91	0.312051	0.110616	2.89318	0.00381367	0.484747	891.21	1475.65	2489.22	3086.35	874.984	881.457	852.19	1391.28	2020.06	2038.24	2584.33	2381.49	551.455	1258.85	1910.4	1903.33	-1.02662	-0.248103	1.10203	1.89746	-1.04823	-1.03961	-1.0786	-0.360487	0.477092	0.5013	1.22874	0.958534	-1.4792	-0.536898	0.331005	0.321592
KMT2E-AS1	406.952	0.313728	0.109269	2.8864	0.00389674	0.491453	407.821	365.993	273.687	417.968	628.665	450.852	765.049	510.36	428.549	374.087	376.395	312.15	411.27	278.667	238.799	270.917	0.00631601	-0.297517	-0.968005	0.0800177	1.61047	0.318883	2.60113	0.751136	0.156874	-0.238725	-0.22196	-0.688618	0.031366	-0.931827	-1.22142	-0.988126
CDC42EP3	1583.41	0.251239	0.0889463	2.87812	0.00400058	0.501415	484.588	3877.97	3536.57	3713.3	488.961	444.103	563.855	372.57	390.04	400.807	514.528	3570.89	454.904	253.224	3307.48	2960.73	-0.712731	1.48833	1.26688	1.38152	-0.709894	-0.738991	-0.661315	-0.785389	-0.774058	-0.767074	-0.693311	1.28915	-0.731985	-0.862801	1.11829	0.893379
PLK3	1121.13	0.28826	0.101654	2.87114	0.00408996	0.507996	735.278	1759.88	1398.47	1330.65	827.19	828.812	1102.08	1312.36	1129.41	1115.31	1263.66	1287.17	753.84	631.242	1200.69	1261.97	-1.29311	2.14068	0.929485	0.702182	-0.985081	-0.979646	-0.0638291	0.640874	0.0277598	-0.0194841	0.477689	0.55647	-1.2309	-1.64177	0.266652	0.472031
TFPI2	63594.7	0.222466	0.0782614	2.8701	0.00410344	0.507996	26634.3	109554	120325	134174	20643	21321	25715.6	40569.3	39065	40919.7	49670.2	123615	19416	33682.4	101399	110812	-0.845083	1.05083	1.29712	1.61375	-0.982073	-0.966571	-0.866089	-0.526466	-0.560861	-0.518454	-0.318378	1.37234	-1.01013	-0.683932	0.864386	1.0796
GEMIN2	99.9343	0.276139	0.0960492	2.86661	0.00414889	0.510491	103.155	131.083	122.158	153.491	117.645	91.7903	94.8302	74.9153	77.0177	84.9711	80.395	123.784	85.4105	59.3683	110.473	88.4626	0.130228	1.25953	0.898646	2.16566	0.716157	-0.329315	-0.206391	-1.01168	-0.926669	-0.60506	-0.790103	0.964389	-0.587294	-1.64035	0.426136	-0.463874
CCR7	96.9593	0.313173	0.109853	2.85589	0.00429159	0.519552	33.5853	132.38	134.173	147.588	71.6898	43.1954	60.23	99.6641	106.174	133.068	145.442	131.856	44.562	75.1191	84.8073	107.814	-1.63451	0.913562	0.959806	1.30578	-0.651737	-1.38665	-0.947304	0.0697609	0.237672	0.931297	1.25044	0.900051	-1.3514	-0.563292	-0.313419	0.279955
GRM2	14.2296	0.294719	0.104579	2.85774	0.00426671	0.519552	9.5958	19.4677	20.6934	16.5298	14.7056	16.1983	25.6298	13.3777	7.15164	17.6355	21.195	16.1457	11.1405	8.48118	5.57943	4.14669	-0.755868	0.854437	1.05437	0.375207	0.0776444	0.32113	1.8596	-0.138959	-1.15456	0.555571	1.1362	0.312551	-0.503897	-0.937683	-1.41102	-1.64473
RGS3	1810.01	0.26687	0.0941558	2.85529	0.00429978	0.519552	929.593	3301.72	2493.22	2366.12	1014.69	979.996	1299.43	1901.64	1837.97	1915.86	2001.1	2421.85	981.292	1174.04	2148.08	2193.6	-1.27589	2.16175	0.990091	0.805903	-1.15257	-1.20284	-0.739926	0.13279	0.0405183	0.153388	0.276925	0.886666	-1.20097	-0.921642	0.489917	0.555881
LOC541472	39.7592	0.31765	0.115213	2.8515	0.00435131	0.52265	23.9895	71.3816	56.0724	66.1192	20.2202	18.898	25.6298	28.7621	39.6091	37.9431	40.9284	69.0677	2.78512	16.9624	62.4896	55.2891	-0.737651	1.47918	0.763075	1.23303	-0.913964	-0.975813	-0.660924	-0.514404	-0.00702084	-0.0849518	0.0546887	1.37095	-1.72952	-1.06635	1.06324	0.726435
C6orf141	22.4086	-0.334295	0.114959	-2.84711	0.00441187	0.526788	15.5932	28.5526	28.0362	29.5175	27.573	16.1983	26.9113	8.69553	12.1028	10.1538	4.38518	19.7336	38.0634	16.9624	34.5924	41.4669	-0.619629	0.558584	0.511634	0.646305	0.469522	-0.564615	0.409359	-1.24673	-0.936958	-1.11415	-1.63861	-0.243199	1.42325	-0.495148	1.10769	1.73268
DYRK2	734.414	0.224502	0.0791549	2.83981	0.00451406	0.534365	743.674	712.518	784.347	879.622	836.381	791.016	763.768	560.527	666.753	760.999	756.444	888.91	622.011	558.546	706.355	718.759	0.0948113	-0.224199	0.511258	1.48678	1.04404	0.579548	0.300548	-1.78044	-0.692783	0.272202	0.225558	1.58188	-1.1509	-1.80072	-0.287298	-0.160297
H3F3A	22.7712	0.0193225	0.0228221	2.83694	0.00455477	0.534365	0	0	74.7633	0	0	93.1401	30.7557	75.5842	0	12.2914	16.8099	60.9948	0	0	0	0	-0.680804	-0.680804	1.55443	-0.680804	-0.680804	2.10386	0.238718	1.57898	-0.680804	-0.31332	-0.17823	1.14279	-0.680804	-0.680804	-0.680804	-0.680804
KLF10	1555.87	0.31516	0.114799	2.83849	0.00453269	0.534365	1400.99	1061.64	2248.91	2101.65	1457.69	1436.25	898.324	1205.33	2037.12	1985.33	2437.43	1937.48	792.832	1045.61	1517.6	1329.7	-0.305332	-0.974318	1.36625	1.07594	-0.19354	-0.235817	-1.29628	-0.69104	0.948732	0.84664	1.7379	0.752312	-1.50424	-1.00592	-0.0754337	-0.445857
APBA1	538.983	-0.199005	0.0708184	-2.83353	0.00460376	0.53699	842.031	132.38	102.799	97.9981	827.19	789.666	877.82	707.682	725.067	733.744	646.814	89.6983	1001.72	808.136	113.82	127.165	0.861983	-1.15653	-1.24067	-1.25433	0.819771	0.713038	0.963781	0.479844	0.529292	0.553975	0.306713	-1.27794	1.31619	0.765572	-1.20932	-1.17137
GREM1	26308.6	0.280865	0.103304	2.826	0.00471331	0.543485	4277.33	52410.9	65510	68864.3	4018.31	4279.05	4618.49	6550.41	7658.86	9745.49	12016.1	65378.4	2509.4	7190.83	51418.9	54490.2	-0.811093	0.960975	1.44322	1.56672	-0.820629	-0.81103	-0.798533	-0.727408	-0.6866	-0.609779	-0.526184	1.43838	-0.87618	-0.703831	0.924451	1.03752
SERPINE2	9618.21	0.218169	0.0772684	2.82725	0.00469495	0.543485	5438.42	6419.15	6601.86	7876.45	5038.51	5287.39	5441.2	17493.4	18573.4	17374.7	19454.9	6090.51	3583.53	17397.3	5548.18	6272.55	-0.701005	-0.536523	-0.50588	-0.292116	-0.768074	-0.726334	-0.700537	1.32077	1.50189	1.30086	1.64973	-0.59164	-1.01209	1.30466	-0.682596	-0.561109
HSD17B7P2	20.4199	0.323147	0.113399	2.81396	0.00489351	0.558638	17.9921	29.8505	17.3558	16.5298	18.382	22.9476	16.6594	23.411	36.8585	29.9269	21.195	25.1155	12.0689	18.174	7.8112	12.4401	-0.325651	1.26498	-0.41101	-0.5218	-0.273352	0.339053	-0.504421	0.40122	2.205	1.27524	0.103976	0.629853	-1.12017	-0.301259	-1.69128	-1.07038
INHBB	3.36635	0.199025	0.0733542	2.81353	0.00490009	0.558638	2.39895	9.08493	4.6727	9.4456	3.6764	1.34986	5.12596	2.00666	2.20051	2.13764	5.84691	3.58793	0	1.2116	1.11589	0	-0.338032	1.99821	0.456474	2.12424	0.108341	-0.704611	0.614852	-0.475108	-0.407373	-0.42934	0.86677	0.0774277	-1.17628	-0.752922	-0.786366	-1.17628
TIPARP	4573.73	0.310176	0.113219	2.80106	0.00509343	0.577417	4280.92	3443.19	5593.89	6550.52	5433.72	4948.58	3328.03	3298.95	5227.3	6066.62	6336.59	4742.35	3146.26	2927.22	3918.99	3936.59	-0.243194	-0.938985	0.847305	1.64184	0.714273	0.31133	-1.03463	-1.05878	0.542829	1.23993	1.46416	0.140046	-1.1856	-1.36753	-0.543804	-0.529187
SNHG18	318.842	0.252994	0.0910716	2.79456	0.00519701	0.583325	209.908	452.949	517.335	396.715	200.364	237.575	176.846	304.343	338.878	297.666	317.195	448.491	118.832	272.609	409.53	402.229	-0.96458	1.18748	1.75761	0.689553	-1.04909	-0.719597	-1.25734	-0.128378	0.177418	-0.187503	-0.0145819	1.14802	-1.77104	-0.409374	0.803023	0.738372
SOCS3	4455.38	0.306284	0.110035	2.79417	0.00520335	0.583325	3440.09	5954.52	4749.47	4029.73	3200.31	4130.56	5821.81	5240.73	4688.18	6472.77	5976.27	4015.79	3976.23	3869.84	2848.85	2870.89	-0.879155	1.29814	0.25466	-0.368577	-1.08679	-0.281263	1.18322	0.680049	0.201587	1.7469	1.31697	-0.380646	-0.414905	-0.507026	-1.39112	-1.37204
ZRANB2-AS1	72.7959	-0.316029	0.114949	-2.79218	0.00523536	0.583671	141.538	2.59569	4.00517	2.3614	101.101	80.9914	57.667	107.691	92.4213	119.708	111.822	5.3819	173.606	150.238	6.69531	6.91114	1.13333	-1.15737	-1.13413	-1.16123	0.466659	0.135118	-0.249425	0.575301	0.323558	0.773422	0.643414	-1.11144	1.66203	1.27677	-1.08978	-1.08622
ADAMTS1	19128.7	0.260953	0.0935488	2.77863	0.00545883	0.589876	14430.9	13994.7	13287.2	17657.4	14913.3	13494.5	15135.7	31917.3	32191.2	31865.2	32120	13513.9	14992.3	28311.4	8459.52	9775.12	-0.536621	-0.586446	-0.667263	-0.168068	-0.481512	-0.643578	-0.456114	1.46079	1.49209	1.45485	1.48395	-0.641359	-0.472489	1.04891	-1.21871	-1.06843
ALDH1A3	2847.96	-0.157279	0.0565456	-2.77335	0.00554828	0.589876	1965.94	4199.83	3722.14	3888.05	2088.2	1968.09	2045.26	1983.92	1890.23	1943.11	1717.53	4464.28	2258.74	2007.62	4538.3	4886.18	-0.747494	1.14568	0.740845	0.881444	-0.643884	-0.74567	-0.680274	-0.732258	-0.811652	-0.766838	-0.958015	1.36979	-0.499356	-0.712173	1.43252	1.72734
CLK1	613.274	0.235913	0.0850141	2.77349	0.00554587	0.589876	612.931	472.416	525.345	630.494	738.957	662.78	836.812	723.735	715.164	648.239	588.345	601.875	563.523	534.315	470.903	486.544	-0.00325735	-1.34026	-0.836637	0.163848	1.19587	0.471049	2.12697	1.05104	0.969487	0.332691	-0.237196	-0.108455	-0.473374	-0.751296	-1.35465	-1.20583
IGSF9	17.9329	0.290371	0.107433	2.78254	0.00539355	0.589876	3.59842	50.616	30.0388	41.3245	5.5146	5.39943	5.12596	22.7421	23.1053	15.4979	17.5407	17.0427	0.928375	8.48118	17.8542	22.1157	-1.03174	2.3524	0.871337	1.68364	-0.893816	-0.902106	-0.921789	0.346152	0.372292	-0.175261	-0.0282248	-0.0640724	-1.22391	-0.680294	-0.00566489	0.30106
PCMT1	1396.59	0.191788	0.06911	2.7713	0.00558335	0.589876	1693.66	1305.63	1302.35	1570.33	1740.78	1521.29	1799.21	1344.46	1277.39	1339.76	1287.05	1246.81	1562.45	1218.87	1014.34	1120.99	1.31334	-0.402095	-0.416616	0.768121	1.52165	0.551308	1.77999	-0.230438	-0.526944	-0.251204	-0.484251	-0.66217	0.733298	-0.785687	-1.6899	-1.21841
PTGER3	235.725	-0.243692	0.111755	-2.77342	0.00554704	0.589876	320.26	2.59569	0.667529	1.1807	246.319	315.867	365.224	586.614	422.497	338.281	309.155	1.79397	463.259	373.172	12.2747	12.4401	0.424748	-1.17137	-1.18106	-1.17848	0.0532295	0.402675	0.650675	1.76305	0.938444	0.515298	0.368953	-1.1754	1.14325	0.690608	-1.12274	-1.1219
RBP5	21.4845	-0.317209	0.115385	-2.77309	0.00555273	0.589876	15.5932	16.872	14.6856	23.614	18.382	16.1983	23.0668	19.3977	21.4549	21.9108	27.0419	11.6608	27.8512	32.7131	25.6654	27.6446	-1.01961	-0.798283	-1.17668	0.368546	-0.536949	-0.914883	0.273844	-0.361163	-0.00512106	0.0737737	0.961817	-1.70019	1.10188	1.94332	0.723572	1.06611
RPL36AL	1638.62	0.269039	0.0970957	2.77219	0.00556802	0.589876	1537.73	2138.85	1959.2	2761.66	1669.09	1580.68	1926.08	1515.03	1175.07	1302.36	1179.61	1913.26	1469.62	1188.58	1321.21	1579.89	-0.238872	1.18434	0.758999	2.65889	0.0721346	-0.137169	0.680586	-0.292612	-1.09749	-0.796132	-1.08674	0.650247	-0.400127	-1.06551	-0.751499	-0.139052
SNORD13	7.26578	-0.177121	0.0667229	-2.77692	0.00548769	0.589876	7.19685	3.89354	0.667529	3.5421	1.8382	2.69971	12.8149	12.04	8.80202	0.53441	4.38518	0	16.7107	7.26959	14.5065	19.3512	-0.0111905	-0.547469	-1.0712	-0.604524	-0.881145	-0.741282	0.900876	0.775069	0.249403	-1.09281	-0.467653	-1.17957	1.53335	0.000618312	1.1755	1.96202
TBC1D8	240.827	-0.276183	0.101955	-2.77567	0.00550888	0.589876	357.443	54.5096	38.0492	38.9631	327.2	332.065	392.136	357.854	353.731	309.958	300.385	30.4974	511.534	325.92	58.026	64.9647	0.7207	-1.15146	-1.25319	-1.24754	0.533791	0.563858	0.935102	0.72324	0.697759	0.427232	0.368072	-1.29986	1.673	0.525881	-1.12973	-1.08685
PTGS2	18217.5	0.270262	0.113462	2.76419	0.0057064	0.599737	4133.39	17533.9	40103.1	52920.2	3909.85	4527.42	3672.75	6110.28	11796.4	13079.7	18014.3	44460.7	1519.75	5789.01	32753.5	31155.4	-0.841616	-0.0408477	1.30781	2.07371	-0.854974	-0.81807	-0.869142	-0.723484	-0.383704	-0.307017	-0.0121399	1.56821	-0.997798	-0.742682	0.868619	0.773127
CD83	30.3781	0.311454	0.113717	2.76105	0.00576165	0.602406	47.979	9.08493	11.348	11.807	49.6314	58.0439	41.0077	34.7821	62.1643	37.4087	51.1604	8.07285	18.5675	26.6551	10.043	8.29337	0.896442	-1.08449	-0.969232	-0.945854	0.980604	1.40906	0.541382	0.224304	1.61892	0.358079	1.05848	-1.13604	-0.601532	-0.189615	-1.0357	-1.12481
ADAMTSL4-AS1	71.6585	0.295584	0.111164	2.75615	0.00584862	0.603917	61.1732	79.1687	36.0466	113.347	130.512	89.0906	160.186	70.2331	57.2132	70.5421	66.5086	38.5703	75.1983	42.4059	24.5495	31.7913	-0.281661	0.201739	-0.956623	1.11986	1.58095	0.468266	2.37806	-0.0382913	-0.388038	-0.0299915	-0.138341	-0.88883	0.0950874	-0.785795	-1.26546	-1.07093
ARL5A	832.552	0.179485	0.0651899	2.75156	0.00593128	0.603917	854.026	947.428	979.265	983.523	840.058	823.413	782.99	761.862	758.074	818.715	754.982	971.432	686.069	825.098	783.351	750.55	0.233124	1.24713	1.59277	1.63899	0.0814824	-0.0992211	-0.538067	-0.767441	-0.808559	-0.150218	-0.842131	1.50773	-1.59028	-0.0809271	-0.534144	-0.890244
GCH1	139.517	0.304049	0.115095	2.75293	0.00590651	0.603917	53.9764	301.1	257.666	276.284	53.3078	68.8427	119.178	125.751	76.4676	78.5582	92.8197	226.937	52.9174	38.7711	183.005	226.685	-0.941678	1.77881	1.30066	1.50561	-0.949038	-0.778021	-0.223895	-0.151545	-0.694082	-0.671067	-0.514069	0.96237	-0.953337	-1.10907	0.478746	0.959605
ITPRIP	6654.05	0.205907	0.0752342	2.75157	0.00593109	0.603917	4697.14	8779.93	9001.63	7408.89	4683.74	4198.06	4818.4	6641.37	7041.07	7070.24	8313.57	8639.74	3633.66	5413.42	8366.91	7757.07	-1.07674	1.16972	1.2917	0.415333	-1.08412	-1.35135	-1.01002	-0.00697547	0.212947	0.228997	0.913111	1.09258	-1.6619	-0.682629	0.942457	0.606908
LOC646626	13.1671	0.223218	0.0905968	2.75021	0.00595567	0.603917	3.59842	41.5311	17.3558	34.2403	7.3528	4.04957	16.6594	19.3977	13.203	6.94732	4.38518	15.2487	3.7135	2.4232	12.2747	8.29337	-0.855818	2.53685	0.374628	1.88477	-0.520029	-0.815467	0.312342	0.557258	0.00321148	-0.556295	-0.785451	0.186175	-0.845526	-0.960929	-0.0798151	-0.435905
PCDHGB2	161.851	-0.292799	0.105903	-2.75098	0.00594167	0.603917	97.1574	125.891	206.934	158.214	121.321	90.4404	84.5783	131.771	185.393	183.302	162.252	209.894	117.904	227.78	271.16	215.628	-1.17356	-0.652325	0.817813	-0.0659835	-0.735223	-1.29541	-1.40175	-0.545669	0.427047	0.389131	0.00726466	0.871507	-0.797221	1.19597	1.98289	0.975518
NFKBIZ	7720.42	0.299487	0.113829	2.73901	0.00616243	0.621511	5394.04	11201.7	8231.3	8541.18	5805.04	6102.7	10303.2	9587.82	8244.75	8619.49	9594.78	7595.65	4804.34	3616.62	7553.43	8330.69	-1.11527	1.66894	0.244918	0.393476	-0.918238	-0.775536	1.23818	0.895235	0.251363	0.431017	0.89857	-0.0598145	-1.39798	-1.96737	-0.0800572	0.292566
TCTEX1D2	103.135	0.267002	0.0970869	2.7375	0.00619078	0.621511	93.559	128.487	111.477	115.709	121.321	97.1897	96.1117	126.42	96.8223	106.882	101.59	109.432	88.1956	78.7538	81.4596	96.756	-0.641396	1.69798	0.558728	0.842126	1.21805	-0.398221	-0.470425	1.55952	-0.422832	0.250937	-0.1035	0.421729	-1.00062	-1.63301	-1.45178	-0.42727
RHOB	8798.81	0.300205	0.115	2.7355	0.00622858	0.622211	4565.2	19944	10402.1	11448.1	4900.64	5411.58	10778.6	11606.5	8945.06	9487.91	9329.47	8606.55	5535.9	3920.73	7255.48	8643.08	-1.08622	2.85954	0.411361	0.679725	-1.00016	-0.869067	0.50796	0.720379	0.0375237	0.176804	0.136154	-0.0493275	-0.83717	-1.25158	-0.395973	-0.0399561
FAM46C	98.5639	0.296355	0.107698	2.72692	0.00639282	0.632356	116.349	54.5096	74.7633	95.6367	101.101	130.936	94.8302	128.426	116.627	150.169	151.289	69.9647	101.193	95.7162	45.7513	49.7602	0.535183	-1.32566	-0.716197	-0.0880831	0.0763475	0.974132	-0.112352	0.898604	0.543542	1.55288	1.58657	-0.860595	0.0791094	-0.0856907	-1.58921	-1.46858
LLPH	285.485	0.228999	0.083838	2.72746	0.0063824	0.632356	381.433	245.293	276.357	323.512	398.89	353.663	337.032	231.435	260.21	250.638	236.8	299.592	263.658	242.32	215.366	251.566	1.69143	-0.708533	-0.160916	0.670359	1.99917	1.20188	0.908695	-0.952836	-0.44557	-0.614307	-0.858258	0.248689	-0.384777	-0.760952	-1.23611	-0.597956
TXNL4B	208.902	0.221985	0.081303	2.72385	0.00645265	0.635162	275.879	189.486	221.62	170.021	246.319	259.173	251.172	192.639	201.896	215.367	209.758	194.645	205.171	164.777	189.7	154.81	1.92997	-0.55949	0.366462	-1.12038	1.07818	1.44856	1.21802	-0.468615	-0.201869	0.186291	0.0246594	-0.410813	-0.107517	-1.27147	-0.5533	-1.55869
CLEC16A	1147.74	-0.167769	0.0617286	-2.7204	0.00652035	0.638709	1206.67	1070.72	1039.34	958.728	1231.59	1251.32	1026.47	1078.91	1159.67	1093.94	1186.19	1075.48	1277.44	1215.23	1308.93	1183.19	0.584584	-0.763982	-1.07527	-1.87494	0.831817	1.02746	-1.20294	-0.682735	0.11831	-0.533718	0.381429	-0.716776	1.28663	0.669508	1.59899	0.351633
RNU5A-1	1.87212	-0.163712	0.0539344	-2.71022	0.00672396	0.655472	3.59842	1.29785	0	0	1.8382	0	1.28149	2.67555	0.550127	0	0	0.896983	5.57025	3.63479	4.46354	4.14669	0.916655	-0.304933	-0.99408	-0.99408	-0.0180095	-0.99408	-0.313619	0.426614	-0.701967	-0.99408	-0.99408	-0.517789	1.96368	0.935967	1.37603	1.20778
AKIRIN1	1224.99	0.165537	0.061449	2.69633	0.00701087	0.680156	1162.29	1571.69	1566.69	1288.14	1036.75	1071.79	957.272	1210.02	1161.32	1260.67	1242.47	1451.32	936.73	1041.97	1323.44	1317.26	-0.322387	1.78272	1.757	0.324737	-0.967931	-0.787752	-1.37657	-0.07699	-0.327394	0.18348	0.0898759	1.16377	-1.4822	-0.941046	0.506225	0.47447
COL15A1	851.401	0.283539	0.108347	2.68729	0.00720339	0.695489	483.388	2225.81	1645.46	1395.59	389.699	481.899	692.004	375.245	331.726	350.573	486.024	1459.39	388.061	242.32	1259.83	1415.4	-0.599762	2.23991	1.2941	0.886877	-0.752451	-0.602189	-0.259774	-0.776006	-0.84693	-0.816215	-0.595466	0.990859	-0.75512	-0.992639	0.665635	0.919169
SRGN	2028.05	0.275697	0.104688	2.68244	0.00730863	0.70229	352.646	4576.21	3509.2	3896.31	461.388	399.558	670.219	2060.84	1823.12	1636.36	2149.47	3241.7	343.499	1491.48	2648	3188.8	-1.21598	1.84941	1.07499	1.35595	-1.13706	-1.18193	-0.985491	0.0237986	-0.148735	-0.28428	0.0881248	0.880845	-1.22262	-0.389435	0.449947	0.842455
SLC7A5P1	136.458	0.293301	0.113858	2.68022	0.0073573	0.703616	140.339	224.527	137.511	198.358	156.247	124.187	248.609	182.606	114.426	82.2991	65.7777	129.166	146.683	53.3103	76.9961	102.285	0.0692945	1.57263	0.0188045	1.10532	0.353368	-0.21912	2.00264	0.82405	-0.39341	-0.967094	-1.26211	-0.130217	0.182589	-1.48474	-1.06179	-0.610214
RGCC	489.117	0.297911	0.114195	2.67663	0.00743663	0.707848	470.194	342.632	177.563	290.452	514.696	489.998	865.005	1187.27	650.25	733.744	726.478	135.444	585.804	445.868	102.661	107.814	-0.0628245	-0.486325	-1.03434	-0.659558	0.0849205	0.00292415	1.24793	2.31784	0.53495	0.812148	0.788025	-1.17418	0.320996	-0.143586	-1.28301	-1.26591
BAMBI	593.831	0.287988	0.11422	2.67487	0.00747593	0.708226	94.7585	2363.38	1465.23	1468.79	82.719	97.1897	246.046	221.401	146.334	155.513	164.444	1069.2	72.4132	138.122	716.398	999.351	-0.723645	2.56581	1.26351	1.26868	-0.741102	-0.72012	-0.504281	-0.540015	-0.648862	-0.635552	-0.622602	0.689282	-0.756045	-0.660769	0.177721	0.587997
MTMR4	1735.15	-0.149173	0.0559653	-2.6689	0.00761011	0.708226	1911.96	1454.89	1499.27	1327.11	1816.14	1955.94	1972.21	1658.17	1789.56	1791.88	1699.99	1550.88	1971.87	1905.84	1836.75	1619.97	0.884413	-1.4019	-1.17989	-2.04106	0.405118	1.10441	1.18578	-0.385068	0.272159	0.283732	-0.175889	-0.921719	1.18406	0.853804	0.508181	-0.576135
PLXNA4	1581.2	-0.268903	0.09963	-2.66902	0.00760733	0.708226	298.669	2022.05	2379.07	1969.41	325.362	313.167	244.764	1226.07	1893.54	1650.79	1718.99	2532.18	334.215	1749.55	3614.35	3027.08	-1.22074	0.419601	0.759427	0.3695	-1.19533	-1.20694	-1.27205	-0.338023	0.297283	0.0662349	0.131149	0.905159	-1.18691	0.160232	1.93519	1.37621
SCARNA6	25.9053	-0.272148	0.0941096	-2.66863	0.00761609	0.708226	19.1916	31.1483	14.0181	4.7228	3.6764	13.4986	17.9408	56.1865	20.9048	14.9635	21.195	25.1155	55.7025	55.7335	24.5495	35.9379	-0.394761	0.308282	-0.698956	-1.24551	-1.30704	-0.729505	-0.468303	1.7805	-0.294026	-0.64337	-0.27696	-0.0464402	1.75204	1.75386	-0.0797233	0.589907
ZFAS1	612.043	0.240865	0.0903116	2.67015	0.00758171	0.708226	575.748	503.565	742.292	850.104	667.267	641.182	640.745	531.096	601.838	612.433	547.417	748.084	486.468	506.448	565.754	572.243	-0.361229	-1.07964	1.29632	2.36933	0.549625	0.290014	0.285659	-0.805632	-0.101559	0.00388805	-0.643197	1.35396	-1.24979	-1.05094	-0.460696	-0.396114
ING1	782.235	0.290838	0.109976	2.66217	0.00776385	0.715955	656.113	842.303	670.199	662.373	792.265	849.06	1295.59	1178.58	882.403	884.982	883.614	560.614	767.766	563.393	465.324	561.185	-0.564413	0.268811	-0.501373	-0.536398	0.0448847	0.299052	2.29731	1.77369	0.448265	0.459808	0.453685	-0.99178	-0.0647504	-0.979345	-1.41822	-0.989227
MMP24	51.2769	-0.308182	0.115056	-2.65769	0.00786773	0.715955	40.7821	51.9139	34.044	22.4333	68.0134	64.7931	55.104	61.5376	49.5114	38.4775	50.4296	25.1155	102.121	71.4843	39.056	45.6135	-0.53146	0.0322564	-0.872684	-1.46065	0.847546	0.684469	0.193808	0.519605	-0.0894066	-0.648169	-0.0429088	-1.32483	2.57478	1.02331	-0.618874	-0.286795
PLK2	1620.56	0.222227	0.0845841	2.65731	0.00787661	0.715955	832.435	2084.34	2572.66	2566.84	886.013	1017.79	1014.94	1432.75	1491.39	1633.69	1638.6	2311.52	660.074	1119.52	2311	2355.32	-1.18563	0.697713	1.43233	1.42358	-1.10503	-0.906787	-0.911079	-0.282524	-0.19431	0.0197595	0.0271399	1.03948	-1.44493	-0.753755	1.03869	1.10536
TNFAIP3	7093.65	0.258611	0.113804	2.66024	0.00780842	0.715955	4442.85	6369.83	9563.69	8438.46	4292.2	5584.36	5164.4	6851.4	10323.7	9497.53	11628	8526.72	1495.61	2835.14	9584.34	8900.17	-0.910527	-0.248626	0.848438	0.461932	-0.962276	-0.518429	-0.662681	-0.0832096	1.10949	0.825712	1.55752	0.492247	-1.92288	-1.46276	0.85553	0.620525
TPT1	23399.2	0.187766	0.0707066	2.66008	0.00781226	0.715955	19838.1	27919.3	27350	33324.1	18236.8	18487.6	21110	20625.1	24016.3	25147.7	23730.4	27481.8	15641.3	22381.8	23025.2	26071.6	-0.796745	1.01131	0.883941	2.22056	-1.15502	-1.09889	-0.512182	-0.620662	0.138075	0.391208	0.0741048	0.91342	-1.73573	-0.227618	-0.0836818	0.597915
ABCA13	64.296	-0.289223	0.110869	-2.6538	0.0079592	0.719725	82.7637	20.7655	24.031	31.8789	101.101	106.639	64.0745	69.5642	72.6167	77.4894	62.8543	30.4974	94.6942	104.197	46.8672	38.7024	0.628621	-1.48173	-1.37058	-1.10345	1.2528	1.4413	-0.00754225	0.179323	0.283227	0.449088	-0.0490767	-1.15047	1.03472	1.3582	-0.59326	-0.87118
DUSP5	1420.78	0.28092	0.107321	2.65101	0.00802508	0.719725	1125.11	2136.26	1742.92	1765.15	990.79	1097.43	1900.45	1428.74	1296.65	1204.56	1566.97	1691.71	1109.41	805.712	1460.69	1409.87	-0.814793	1.97169	0.887747	0.949003	-1.18494	-0.891054	1.32186	0.0219512	-0.342067	-0.595842	0.402879	0.746628	-0.858057	-1.69497	0.110003	-0.0300457
PHACTR1	115.326	-0.258073	0.098768	-2.65249	0.00798996	0.719725	141.538	38.9354	54.0699	64.9385	130.512	99.8894	130.712	150.499	162.837	167.27	168.829	48.4371	151.325	179.316	81.4596	74.6403	0.540782	-1.57599	-1.26376	-1.03953	0.313312	-0.318462	0.317431	0.725664	0.980207	1.07166	1.10383	-1.37997	0.742697	1.32018	-0.698684	-0.839371
CAMLG	554.272	0.154349	0.0583963	2.64156	0.00825246	0.732805	531.367	608.69	626.142	591.531	544.107	543.992	492.092	539.123	560.029	605.486	571.535	597.391	476.256	520.987	488.758	570.86	-0.504488	1.19861	1.58301	0.820659	-0.223874	-0.226408	-1.36956	-0.33367	0.126805	1.12804	0.380243	0.949727	-1.71835	-0.733121	-1.443	0.36538
SNHG24	52.7094	-0.296483	0.115055	-2.64044	0.00827987	0.732805	58.7743	6.48923	6.00776	17.7105	75.3662	49.9447	41.0077	86.2864	81.4187	81.2303	86.9728	16.1457	64.0578	130.853	18.97	22.1157	0.166836	-1.27145	-1.28469	-0.962769	0.623257	-0.0760522	-0.321898	0.923654	0.789752	0.784568	0.942536	-1.00581	0.31218	2.14961	-0.928121	-0.841589
TIFA	202.266	0.262679	0.0995417	2.64113	0.00826309	0.732805	201.512	232.315	202.929	211.345	196.687	225.426	226.824	259.528	255.809	196.128	225.837	139.929	151.325	173.258	167.383	170.014	-0.0214805	0.85621	0.0188988	0.258716	-0.158941	0.659932	0.699751	1.63162	1.52565	-0.174874	0.671634	-1.7762	-1.45149	-0.826523	-0.993944	-0.918966
CDADC1	108.86	0.273593	0.1036	2.63105	0.00851222	0.750079	115.15	105.126	84.7762	127.516	152.571	126.887	110.208	134.446	117.727	127.724	100.859	93.2862	80.7686	104.197	80.3437	80.1693	0.28989	-0.172093	-1.10995	0.859815	2.01455	0.830824	0.0621477	1.17923	0.408682	0.869414	-0.368724	-0.717744	-1.29465	-0.214872	-1.31424	-1.32228
MYLIP	419.989	0.266429	0.101554	2.62433	0.00868188	0.761702	353.845	406.226	572.072	611.603	376.831	431.954	362.661	337.788	459.906	480.434	477.254	448.491	371.35	331.978	361.547	335.882	-0.785357	-0.163412	1.80576	2.27512	-0.512431	0.142071	-0.680675	-0.976012	0.473952	0.717695	0.679933	0.338424	-0.577513	-1.045	-0.69391	-0.998645
RTKN2	153.928	0.278069	0.105655	2.62221	0.00873617	0.763148	165.527	167.422	159.539	208.984	139.703	174.132	114.053	169.897	161.737	181.165	192.217	136.341	138.328	138.122	127.211	88.4626	0.38098	0.44321	0.184312	1.80824	-0.467176	0.663567	-1.30963	0.524496	0.256494	0.894564	1.25756	-0.577591	-0.51235	-0.519106	-0.877468	-2.15009
SLC5A2	8.01178	-0.253328	0.0873479	-2.61827	0.00883773	0.768692	2.39895	2.59569	3.33765	1.1807	22.0584	8.09914	5.12596	4.68221	6.60152	5.3441	8.0395	4.48491	26.9229	18.174	2.23177	6.91114	-0.739923	-0.713986	-0.616177	-0.900521	1.85173	0.0115169	-0.380429	-0.438928	-0.185911	-0.351673	0.00365406	-0.464936	2.49299	1.33965	-0.761961	-0.145094
HP09053	35.9933	0.282926	0.111621	2.61032	0.00904571	0.780058	29.9869	60.9988	30.7063	38.9631	40.4404	24.2974	52.5411	65.5509	34.1078	28.8581	47.5061	31.3944	32.4931	16.9624	18.97	22.1157	-0.420044	1.7487	-0.369729	0.207687	0.310999	-0.81792	1.15723	2.06703	-0.131853	-0.49898	0.805121	-0.321611	-0.244776	-1.33088	-1.19048	-0.970496
TMPRSS11D	2.74297	0.117705	0.056377	2.61159	0.00901229	0.780058	4.7979	0	2.00259	7.0842	11.0292	6.74929	0	1.33777	2.20051	3.20646	3.65432	0.896983	0.928375	0	0	0	0.637279	-0.85066	-0.229611	1.34631	2.56975	1.24245	-0.85066	-0.435785	-0.168232	0.143737	0.282629	-0.572485	-0.562749	-0.85066	-0.85066	-0.85066
CDA	40.0961	0.294275	0.114878	2.60637	0.00915076	0.781426	26.3884	53.2117	33.3765	23.614	31.2494	55.3441	51.2596	73.5775	55.0127	46.4936	53.353	33.1884	25.0661	25.4435	24.5495	30.409	-0.897868	0.859092	-0.440144	-1.0796	-0.579468	0.998769	0.731224	2.19308	0.977056	0.419049	0.868349	-0.452464	-0.984482	-0.95976	-1.01832	-0.634514
CDIPT-AS1	1.43708	0.104799	0.0513115	2.60536	0.00917776	0.781426	0	1.29785	5.34023	1.1807	1.8382	2.69971	1.28149	0.668887	1.10025	2.13764	3.65432	1.79397	0	0	0	0	-0.95929	-0.0929407	2.60547	-0.171139	0.267761	0.842846	-0.10386	-0.512789	-0.22484	0.467644	1.48007	0.238233	-0.95929	-0.95929	-0.95929	-0.95929
FRMD6-AS1	99.4449	0.29749	0.115267	2.60595	0.00916202	0.781426	110.352	101.232	45.392	68.4806	185.658	133.636	229.387	140.466	83.0691	91.9184	76.7407	61.8918	119.76	65.4263	33.4766	44.2313	0.205162	0.0336179	-1.01676	-0.582451	1.62171	0.643148	2.44426	0.771629	-0.308035	-0.141575	-0.427076	-0.706389	0.382143	-0.639905	-1.24089	-1.03859
HEY1	136.169	0.277847	0.106049	2.59969	0.00933081	0.784527	139.139	106.423	118.82	94.456	176.467	145.785	153.779	201.335	216.75	158.72	153.481	91.4922	104.906	184.163	62.4896	70.4937	0.0647891	-0.648808	-0.378409	-0.909843	0.878998	0.209742	0.384111	1.42141	1.75765	0.491884	0.377625	-0.974489	-0.6819	1.04685	-1.6071	-1.43251
PDCD5	620.717	0.201548	0.0773277	2.60255	0.00925325	0.784527	764.065	524.33	682.882	664.734	733.442	699.226	650.997	531.096	568.281	614.571	643.16	671.84	650.791	531.891	517.771	482.398	1.69024	-1.13651	0.732997	0.51901	1.32916	0.925708	0.357028	-1.05674	-0.618285	-0.0724703	0.264625	0.602798	0.3546	-1.04736	-1.21386	-1.63094
RABGEF1	993.895	0.179947	0.0691578	2.60029	0.00931444	0.784527	929.593	1221.27	1133.46	1266.89	965.055	950.299	857.316	937.779	935.215	943.233	985.204	1144.55	942.3	868.715	846.957	974.471	-0.504728	1.78477	1.09553	2.14283	-0.226369	-0.342194	-1.07205	-0.440472	-0.460596	-0.397662	-0.0682178	1.18254	-0.404982	-0.982573	-1.15336	-0.152463
TSSK4	11.6751	-0.286963	0.108496	-2.59641	0.00942036	0.788769	10.7953	5.19139	6.67529	7.0842	20.2202	18.898	8.97042	6.01998	6.60152	9.08496	9.50123	11.6608	25.9945	14.5392	14.5065	11.0578	-0.150562	-1.10956	-0.855618	-0.785641	1.46234	1.23607	-0.46285	-0.967762	-0.868243	-0.443249	-0.372013	-0.00244728	2.45049	0.490135	0.484545	-0.10563
CAV2	1667.33	0.18606	0.0718927	2.5898	0.00960309	0.792781	1496.94	2643.71	2172.14	2304.73	1408.06	1413.3	1655.68	1401.32	1282.9	1279.38	1270.97	2121.36	1420.41	1239.46	1797.69	1769.25	-0.395854	2.26838	1.17279	1.48082	-0.602349	-0.590179	-0.0270617	-0.618018	-0.893142	-0.901317	-0.920844	1.05483	-0.573654	-0.994043	0.302855	0.236786
CHCHD1	136.168	0.239478	0.0921169	2.59306	0.00951266	0.792781	122.346	164.827	154.867	164.117	158.085	129.586	126.867	143.811	134.231	134.137	153.481	123.784	118.832	101.774	119.4	128.547	-0.749929	1.5549	1.01452	1.51642	1.18914	-0.357117	-0.504633	0.414648	-0.105117	-0.110221	0.939349	-0.671949	-0.940611	-1.86611	-0.909807	-0.413491
CXCL12	556.027	-0.268082	0.105458	-2.58877	0.009632	0.792781	771.262	201.166	218.95	186.551	512.858	699.226	425.454	886.275	844.994	776.497	845.609	238.597	830.895	821.463	303.521	333.117	0.778335	-1.28325	-1.21894	-1.33611	-0.156109	0.517837	-0.472179	1.19424	1.04497	0.797265	1.04719	-1.14789	0.993981	0.959872	-0.913117	-0.80609
IER3	20041.2	0.282486	0.11521	2.5876	0.00966471	0.792781	10030	43379.2	31507.4	27304.9	7913.45	11361.7	19600.4	21207	17412.1	17134.8	18846.8	25761.3	8869.69	7960.2	23834.2	28536.1	-1.01478	2.36564	1.16226	0.736275	-1.22932	-0.879785	-0.0446838	0.118175	-0.266501	-0.294608	-0.121072	0.579817	-1.13239	-1.22458	0.384472	0.861078
MEX3B	559.856	0.194551	0.0752683	2.59022	0.00959148	0.792781	418.617	770.921	718.261	603.338	367.64	433.304	452.366	644.138	574.882	594.263	545.224	724.762	314.719	513.717	665.067	616.474	-1.05584	1.57783	1.18417	0.325051	-1.43692	-0.946044	-0.803549	0.630054	0.11233	0.257215	-0.10938	1.23277	-1.83253	-0.344911	0.786515	0.423252
ANKRD42	591.643	0.236225	0.0918749	2.5777	0.00994604	0.806028	452.202	600.903	708.248	863.092	652.561	579.089	560.011	520.394	569.381	661.599	578.113	637.755	424.267	497.967	540.088	620.621	-1.33056	0.0883587	1.11265	2.59018	0.581285	-0.119795	-0.301838	-0.679866	-0.212427	0.667524	-0.129105	0.44	-1.59711	-0.893868	-0.491939	0.276505
RNY1	26.0016	-0.267204	0.0962353	-2.57919	0.00990331	0.806028	11.9947	14.2763	14.0181	61.3964	31.2494	22.9476	29.4743	18.7288	13.203	6.41291	9.50123	10.7638	35.2782	38.7711	46.8672	51.1425	-0.837028	-0.700685	-0.716115	2.11514	0.313602	-0.182504	0.20752	-0.43461	-0.764823	-1.17059	-0.986037	-0.910588	0.554358	0.763087	1.24689	1.50238
ZSCAN32	188.331	-0.216475	0.084225	-2.57837	0.0099268	0.806028	202.711	147.955	174.893	152.31	176.467	182.231	185.816	181.937	221.151	176.355	217.797	151.59	203.314	241.108	198.628	199.041	0.551177	-1.54765	-0.515113	-1.3807	-0.454756	-0.233843	-0.0964209	-0.245096	1.25797	-0.459054	1.12943	-1.4083	0.574284	2.02293	0.39465	0.410495
TLR9	19.4365	-0.291206	0.110125	-2.56744	0.0102453	0.826956	8.39632	25.9569	16.6882	12.9877	18.382	12.1487	17.9408	11.3711	21.4549	14.9635	26.3111	12.5578	33.4215	35.1363	15.6224	27.6446	-1.36747	0.807645	-0.34041	-0.79877	-0.130612	-0.90269	-0.185256	-0.999011	0.250012	-0.554045	0.851512	-0.852024	1.73223	1.94464	-0.472428	1.01668
PIK3R3	253.137	0.240956	0.0940999	2.55866	0.0105076	0.84475	131.942	228.421	301.723	270.38	172.791	155.234	138.401	316.383	425.798	397.066	424.632	234.113	119.76	287.149	237.684	208.717	-1.2015	-0.24503	0.481673	0.170946	-0.796535	-0.970595	-1.13747	0.627011	1.71172	1.42689	1.70016	-0.188605	-1.32227	0.337184	-0.153203	-0.440376
ACIN1	3516.87	-0.13246	0.0518696	-2.55488	0.0106224	0.848635	3973.86	3148.58	3351.66	3308.32	3672.73	3755.3	3683	2958.49	3492.2	3366.78	3276.46	3289.24	3758.06	3738.99	3704.74	3791.45	1.62471	-1.30935	-0.587331	-0.741421	0.554114	0.847694	0.590643	-1.98517	-0.0876819	-0.533588	-0.854693	-0.809274	0.857499	0.7897	0.667927	0.976217
MUC12	56.1957	0.280473	0.112416	2.5543	0.01064	0.848635	59.9737	80.4665	36.7141	38.9631	139.703	70.1926	105.082	64.882	41.8096	39.5463	36.5432	37.6733	79.8402	26.6551	18.97	22.1157	0.115294	0.740667	-0.594515	-0.525883	2.54838	0.42714	1.49186	0.265078	-0.439016	-0.508085	-0.599731	-0.565244	0.721555	-0.901482	-1.13601	-1.04001
MOCS3	548.747	0.252917	0.0995207	2.5473	0.010856	0.862454	569.75	731.986	553.382	604.518	503.667	480.549	762.486	597.316	467.608	611.365	489.679	554.335	520.818	390.134	453.049	489.309	0.213973	1.86674	0.0472159	0.568172	-0.459251	-0.694764	2.17747	0.494794	-0.826607	0.637916	-0.601759	0.0569324	-0.284524	-1.61586	-0.974918	-0.605524
ANO7	36.0641	-0.284286	0.111736	-2.54242	0.0110086	0.871151	22.79	58.4031	46.0595	43.6859	23.8966	20.2479	19.2223	24.0799	27.5063	22.9796	28.5037	43.0552	26.9229	33.9247	62.4896	73.2581	-0.795267	1.33836	0.598839	0.456633	-0.728969	-0.947571	-1.00901	-0.717987	-0.512706	-0.783908	-0.452954	0.418846	-0.547662	-0.128171	1.58318	2.22834
FOXJ1	4.32939	0.185515	0.077464	2.53999	0.0110855	0.873805	3.59842	6.48923	6.67529	11.807	1.8382	4.04957	10.2519	4.68221	2.20051	2.67205	6.57777	2.69095	1.85675	0	1.11589	2.76446	-0.223286	0.659762	0.716597	2.28417	-0.760976	-0.0854747	1.80914	0.107774	-0.650304	-0.506263	0.686807	-0.50049	-0.75531	-1.32249	-0.98162	-0.478035
POLR2A	11993.2	-0.163582	0.0646014	-2.53632	0.0112024	0.879587	13028.7	9780.57	10472.2	8593.14	12374.8	12910	12602.2	12243.3	12924.1	12873.9	12193	10823.9	12715	14512.5	12832.7	11010.8	0.69975	-1.49517	-1.0278	-2.29758	0.25786	0.619567	0.411524	0.16902	0.629087	0.595167	0.135027	-0.790146	0.487785	1.70245	0.567293	-0.66382
HDGFRP3	1258.41	0.18209	0.0720848	2.52462	0.0115823	0.905887	1282.24	1497.72	1284.99	1592.76	1261.01	1193.27	1341.72	1309.68	1147.01	1252.66	1104.33	1309.59	1127.05	1174.04	1172.8	1083.67	0.17282	1.73552	0.192802	2.42485	0.0188363	-0.472377	0.604194	0.371835	-0.807868	-0.0417193	-1.11739	0.371219	-0.952674	-0.61188	-0.620893	-1.26728
RMND5A	590.473	0.185316	0.0736997	2.52312	0.0116318	0.906246	399.425	922.769	811.715	822.948	419.11	383.359	502.344	531.096	500.615	491.122	511.604	838.679	314.719	472.523	714.166	811.368	-0.977242	1.69975	1.13169	1.18915	-0.876551	-1.05942	-0.450795	-0.303723	-0.459637	-0.508194	-0.403425	1.26962	-1.41053	-0.603333	0.632714	1.12992
OR10A5	1.08492	-0.139297	0.0446635	-2.51948	0.0117527	0.909435	0	0	0.667529	1.1807	1.8382	0	0	0	0	0	0.730863	0.896983	5.57025	1.2116	1.11589	4.14669	-0.675786	-0.675786	-0.259988	0.0596616	0.469213	-0.675786	-0.675786	-0.675786	-0.675786	-0.675786	-0.220538	-0.117063	2.79387	0.0789074	0.0192889	1.90715
RNU2-1	14.4126	-0.243029	0.0915723	-2.51853	0.0117846	0.909435	19.1916	19.4677	8.01035	5.9035	1.8382	16.1983	20.5038	18.7288	11.5527	6.94732	5.11604	2.69095	24.1377	24.232	21.2018	24.8801	0.58148	0.615075	-0.778976	-1.03532	-1.52996	0.217275	0.741144	0.525174	-0.347973	-0.908318	-1.13114	-1.4262	1.18329	1.19476	0.82607	1.27362
TRIM17	18.3391	-0.277172	0.111297	-2.51783	0.0118079	0.909435	17.9921	15.5742	8.01035	5.9035	38.6022	14.8484	20.5038	22.0733	19.2544	17.1011	12.4247	6.27888	30.6364	27.8667	15.6224	20.7334	-0.0396576	-0.315998	-1.18044	-1.42123	2.31581	-0.39894	0.247398	0.426763	0.104608	-0.141489	-0.675943	-1.37833	1.40541	1.08888	-0.310486	0.273639
BPGM	958.321	0.269477	0.108444	2.51515	0.0118981	0.912895	820.441	751.453	1023.32	1471.15	1099.24	877.407	779.145	902.328	978.125	1259.07	1164.27	1042.29	516.176	928.084	858.116	862.511	-0.61802	-0.927241	0.291355	2.29866	0.63166	-0.362679	-0.803116	-0.250976	0.088768	1.34804	0.923104	0.376393	-1.98182	-0.135531	-0.449149	-0.429449
AKR7A2P1	19.5974	0.263936	0.107892	2.51112	0.0120347	0.912965	19.1916	31.1483	18.0233	36.6017	42.2786	20.2479	17.9408	13.3777	14.3033	13.8946	13.1555	24.2185	25.9945	4.84639	10.043	8.29337	-0.0395138	1.12458	-0.153259	1.65552	2.20821	0.063323	-0.161285	-0.605545	-0.515434	-0.555218	-0.627177	0.449904	0.622809	-1.43615	-0.930214	-1.10055
RGAG4	295.306	-0.20213	0.0808689	-2.51171	0.0120148	0.912965	421.016	202.464	230.298	180.647	398.89	349.613	352.41	278.926	313.572	284.84	274.074	182.984	428.909	304.111	267.812	254.33	1.59758	-1.17988	-0.826161	-1.45714	1.31639	0.690162	0.725702	-0.208169	0.232136	-0.133003	-0.269829	-1.42744	1.6979	0.111899	-0.349402	-0.520743
SLC6A13	3.10997	-0.195709	0.0718185	-2.51236	0.0119928	0.912965	2.39895	0	2.00259	1.1807	5.5146	0	5.12596	2.00666	0.550127	2.13764	2.92345	2.69095	6.49862	7.26959	6.69531	2.76446	-0.298113	-1.30393	-0.464297	-0.808891	1.00819	-1.30393	0.845245	-0.462589	-1.07327	-0.407674	-0.0782031	-0.175686	1.42077	1.74401	1.50323	-0.144866
BTG3	477.023	0.193806	0.0771105	2.50971	0.0120831	0.913198	503.779	468.523	523.343	590.35	536.755	464.351	499.781	497.652	456.605	452.645	479.446	462.843	503.179	403.462	380.517	409.14	0.507559	-0.161251	0.878675	2.14979	1.1331	-0.24039	0.431709	0.391318	-0.387327	-0.46245	0.04597	-0.268991	0.496173	-1.39544	-1.8307	-1.28773
ASTN1	3.69056	0.156704	0.068556	2.50643	0.0121959	0.918285	1.19947	0	0.667529	4.7228	3.6764	5.39943	2.56298	12.04	6.60152	9.61937	10.2321	0	0	1.2116	1.11589	0	-0.617665	-0.915075	-0.749561	0.255943	-0.00351163	0.423713	-0.279585	2.07023	0.72177	1.47005	1.62197	-0.915075	-0.915075	-0.614659	-0.638391	-0.915075
CCDC117	658.174	0.146438	0.0585681	2.50204	0.012348	0.926286	620.128	764.432	727.607	845.381	588.224	592.587	648.434	650.827	607.34	632.741	594.923	749.878	514.32	554.912	688.501	750.55	-0.428226	1.196	0.781507	2.10713	-0.787325	-0.738217	-0.109634	-0.0826988	-0.57217	-0.286264	-0.711929	1.03218	-1.61917	-1.16228	0.34135	1.03975
AMIGO2	1450.06	0.206158	0.0840278	2.49885	0.0124597	0.931201	316.661	3430.21	3298.26	3289.43	253.672	276.721	239.638	446.816	496.764	468.143	581.036	3481.19	174.534	470.1	2867.82	3110.01	-0.783481	1.3688	1.27759	1.27149	-0.827023	-0.81109	-0.836724	-0.693509	-0.658982	-0.678767	-0.600728	1.40405	-0.881728	-0.677414	0.980048	1.14747
GOLGA8J	2.67603	-0.147365	0.055515	-2.49585	0.0125656	0.935648	0	1.29785	2.00259	0	0	0	6.40745	3.34443	0.550127	1.60323	2.19259	0	3.7135	3.63479	11.1589	6.91114	-0.845327	-0.435353	-0.212734	-0.845327	-0.845327	-0.845327	1.17871	0.211139	-0.671549	-0.338886	-0.152714	-0.845327	0.327723	0.30286	2.67962	1.33782
AARD	1.39274	0.0989835	0.0500886	2.4913	0.0127278	0.93735	1.19947	3.89354	3.33765	1.1807	3.6764	2.69971	1.28149	0.668887	0.550127	1.60323	2.19259	0	0	0	0	0	-0.139788	1.80885	1.40676	-0.153368	1.65179	0.945344	-0.0804664	-0.523566	-0.609465	0.15225	0.578538	-1.00738	-1.00738	-1.00738	-1.00738	-1.00738
LPIN3	184.265	-0.264031	0.106146	-2.49319	0.0126601	0.93735	184.719	167.422	116.818	107.444	211.393	166.032	253.735	218.057	224.452	185.44	151.289	114.814	226.523	290.783	160.687	168.632	0.00887838	-0.329343	-1.31886	-1.50216	0.530461	-0.356519	1.35841	0.660767	0.785807	0.0229775	-0.644817	-1.35805	0.826318	2.08286	-0.461035	-0.305689
ZFP36L1	4559.49	0.210641	0.084544	2.49157	0.0127181	0.93735	4223.35	5078.47	4786.85	5016.79	3771.99	4468.03	4635.15	5132.37	4844.96	5706.43	5550.91	3927.89	4435.77	3775.34	4003.8	3593.79	-0.520503	0.803621	0.352055	0.708112	-1.21942	-0.141631	0.117146	0.88707	0.44204	1.77598	1.53516	-0.978013	-0.191573	-1.21423	-0.860474	-1.49534
BTBD11	1537.24	-0.229468	0.0928173	-2.48998	0.012775	0.937405	2487.71	900.706	671.534	635.217	2246.28	2190.82	2782.11	1685.59	1331.86	1255.33	1231.5	740.908	3038.57	1502.38	1041.12	854.217	1.21427	-0.813206	-1.10598	-1.15238	0.905834	0.834977	1.59039	0.189528	-0.26239	-0.360158	-0.390593	-1.01736	1.91802	-0.0445357	-0.633819	-0.872597
TLN2	2540.42	-0.167758	0.0677863	-2.4883	0.0128356	0.938444	3837.12	1400.38	1464.56	1224.39	3580.82	3695.91	3534.35	2697.62	2504.18	2507.45	2631.84	1500.65	3720.93	2932.07	1898.12	1516.3	1.37189	-1.20614	-1.13824	-1.39234	1.10072	1.22249	1.05156	0.166318	-0.038342	-0.0348785	0.0967235	-1.10005	1.24896	0.414358	-0.679537	-1.08349
HCN2	137.426	-0.257156	0.103825	-2.48575	0.012928	0.941634	139.139	114.211	86.1113	55.4929	113.968	129.586	151.216	199.328	177.691	168.873	144.711	97.7711	181.033	221.722	106.009	111.961	0.0386823	-0.52439	-1.15908	-1.85067	-0.529857	-0.17709	0.311464	1.3982	0.90947	0.710306	0.164538	-0.895714	0.984961	1.90403	-0.709639	-0.575211
RHCE	7.03819	0.228753	0.0938837	2.48324	0.0130193	0.941634	3.59842	20.7655	7.34282	12.9877	5.5146	4.04957	6.40745	7.35775	5.50127	6.41291	10.2321	8.07285	1.85675	3.63479	3.34766	5.52891	-0.749587	2.99144	0.0663836	1.2965	-0.332018	-0.651274	-0.137451	0.0696376	-0.334924	-0.136259	0.696007	0.225469	-1.12913	-0.741662	-0.804234	-0.328899
WWP2	1158.91	-0.126446	0.0509617	-2.48332	0.0130162	0.941634	1285.84	1013.62	973.925	926.85	1323.5	1437.6	1287.9	1046.81	1100.25	1137.22	1111.64	1053.95	1413.91	1198.27	1162.75	1068.46	0.829545	-0.949528	-1.20894	-1.5166	1.07572	1.82137	0.843008	-0.732622	-0.38333	-0.141711	-0.308889	-0.68591	1.66659	0.257256	0.0251308	-0.591094
KIAA0101	445.239	0.174893	0.0703767	2.47807	0.0132095	0.948596	668.107	337.44	325.754	331.777	667.267	618.235	639.463	479.592	380.688	438.216	382.242	341.75	553.311	393.769	280.087	286.121	1.59631	-0.772113	-0.855814	-0.812677	1.59029	1.23909	1.39114	0.246055	-0.462351	-0.0503016	-0.45122	-0.74124	0.774076	-0.368653	-1.18291	-1.13969
TMEM88	36.6011	0.234399	0.103843	2.47836	0.0131989	0.948596	16.7926	54.5096	47.3946	59.035	23.8966	32.3966	41.0077	48.1598	28.0565	42.2184	57.0074	46.6431	37.135	3.63479	20.0859	27.6446	-1.25669	1.13615	0.684756	1.42325	-0.805998	-0.266745	0.279559	0.733306	-0.54209	0.356368	1.29461	0.637082	0.0338691	-2.09145	-1.04776	-0.568221
CCL2	3706.15	0.240936	0.115088	2.47	0.0135115	0.950931	410.22	5827.33	10866.7	10429.1	376.831	379.31	331.906	749.822	1144.81	899.411	1956.52	8550.94	158.752	577.932	8989.57	7649.25	-0.790267	0.508596	1.71689	1.61197	-0.798272	-0.797678	-0.809044	-0.70884	-0.614133	-0.672973	-0.41951	1.16164	-0.850561	-0.750054	1.26681	0.945438
CRTC1	930.693	-0.192897	0.0782003	-2.47236	0.0134225	0.950931	814.443	731.986	857.775	611.603	746.31	909.804	739.419	1179.92	1292.25	1160.2	1072.91	748.981	920.019	1307.31	932.88	865.275	-0.54754	-0.935918	-0.343445	-1.50293	-0.868452	-0.0983874	-0.900905	1.17385	1.70294	1.081	0.669839	-0.855871	-0.0502718	1.7739	0.0103023	-0.308119
INTS6	940.063	0.273339	0.111586	2.47443	0.013345	0.950931	819.241	1680.71	959.239	918.585	852.925	863.909	1336.59	1143.8	895.056	850.78	801.757	895.189	759.41	666.379	777.772	819.662	-0.478679	2.93435	0.0759748	-0.0850933	-0.345227	-0.301712	1.571	0.807163	-0.178311	-0.353726	-0.547948	-0.177784	-0.71572	-1.0843	-0.642974	-0.477013
MOV10	1733.42	-0.159275	0.0644275	-2.47437	0.0133471	0.950931	1597.7	1700.18	1669.49	1383.78	1593.72	1644.13	1822.28	1799.97	1989.81	1768.36	1708.03	1544.6	1736.06	2020.94	1910.4	1845.28	-0.815528	-0.199742	-0.384148	-2.10095	-0.839442	-0.536559	0.533934	0.399912	1.5406	0.209956	-0.15258	-1.13457	0.0158651	1.7277	1.06342	0.672124
RNASEK	1684.07	0.178313	0.07222	2.46964	0.0135248	0.950931	1510.14	2033.73	2112.06	1617.56	1189.32	1394.4	1237.92	1898.97	2042.62	1896.09	1892.21	1963.5	1247.74	1647.77	1666.02	1595.09	-0.567525	1.1409	1.39651	-0.217019	-1.61434	-0.945162	-1.45576	0.7012	1.16992	0.691791	0.679132	0.911746	-1.42373	-0.118434	-0.0589064	-0.290328
TUBG2	382.322	-0.175293	0.0710027	-2.47067	0.013486	0.950931	272.281	386.758	403.188	309.343	312.494	291.569	308.839	436.783	473.659	433.406	420.977	378.527	343.499	530.68	418.457	396.7	-1.5373	0.0619699	0.291489	-1.01953	-0.975511	-1.26784	-1.02658	0.76082	1.27598	0.713646	0.540014	-0.0530264	-0.542374	2.07257	0.504803	0.200851
CCT6P3	54.7727	0.273603	0.110401	2.46123	0.0138461	0.965132	47.979	60.9988	57.4075	63.7578	49.6314	48.5949	39.7262	71.5709	65.4651	63.5947	48.237	80.7285	31.5647	48.4639	55.7943	42.8491	-0.539802	0.494697	0.209348	0.713916	-0.408506	-0.490867	-1.19554	1.33471	0.849567	0.70096	-0.519302	2.06233	-1.84401	-0.501272	0.0811662	-0.947402
DBR1	476.496	0.182131	0.0738834	2.46061	0.0138703	0.965132	600.937	437.374	433.226	484.087	553.298	568.29	674.063	427.419	427.448	472.418	403.437	466.431	512.463	427.694	335.881	399.464	1.44041	-0.452832	-0.500846	0.0878704	0.888998	1.06252	2.28686	-0.568072	-0.567727	-0.047199	-0.845664	-0.116499	0.416322	-0.564884	-1.62762	-0.891647
LINC00936	253.223	0.273677	0.114426	2.4625	0.0137971	0.965132	184.719	249.187	150.194	175.924	248.157	306.418	562.574	496.314	313.572	328.662	258.726	133.65	220.953	170.835	103.777	147.898	-0.537261	-0.0316533	-0.808035	-0.606237	-0.0397272	0.4172	2.42619	1.90652	0.473312	0.591658	0.0431601	-0.937784	-0.253083	-0.64615	-1.17207	-0.826039
ALG14	130.251	0.229561	0.09327	2.45467	0.0141014	0.971021	131.942	146.657	164.88	170.021	126.836	124.187	129.43	129.764	127.629	127.724	105.975	141.723	97.4793	112.679	146.181	100.903	0.0823179	0.798371	1.68516	1.93534	-0.166172	-0.295081	-0.0399135	-0.0236805	-0.127559	-0.122959	-1.18132	0.558297	-1.59475	-0.855111	0.77522	-1.42816
CABLES2	342.789	-0.20124	0.0821558	-2.45445	0.0141102	0.971021	403.023	273.846	326.422	247.947	393.375	413.056	343.439	287.621	313.022	311.026	340.582	317.532	397.344	387.711	392.792	335.882	1.1926	-1.36502	-0.324055	-1.87779	1.00156	1.39124	0.0128756	-1.09227	-0.589358	-0.62887	-0.0436854	-0.500065	1.08015	0.889427	0.990013	-0.136758
CAMK2A	16.3073	0.267028	0.111408	2.45667	0.014023	0.971021	9.5958	42.8289	34.044	29.5175	12.8674	9.449	11.5334	11.3711	4.95114	5.87851	3.65432	34.0853	5.57025	3.63479	21.2018	20.7334	-0.533166	2.1069	1.40901	1.04943	-0.273267	-0.544828	-0.379241	-0.392137	-0.902141	-0.82847	-1.00516	1.4123	-0.852958	-1.00671	0.388824	0.351615
CASC4	2778.25	0.157081	0.064128	2.4535	0.0141474	0.971021	1944.35	4172.58	3467.81	4121.82	1873.13	1850.65	2114.46	2716.35	2663.71	2808.32	2669.11	3330.5	1733.28	2585.55	3193.66	3206.77	-1.085	1.81417	0.897195	1.74814	-1.17767	-1.20691	-0.863673	-0.0805454	-0.14903	0.0391229	-0.142003	0.718531	-1.35963	-0.250729	0.540494	0.557549
EN1	12.113	0.221307	0.0973607	2.45109	0.0142425	0.974235	10.7953	31.1483	17.3558	25.9754	12.8674	1.34986	23.0668	4.01332	4.95114	6.41291	2.92345	23.3216	5.57025	2.4232	7.8112	13.8223	-0.139537	2.01568	0.555163	1.46791	0.0798845	-1.13973	1.15992	-0.85769	-0.758382	-0.603592	-0.973097	1.18689	-0.692824	-1.02607	-0.455526	0.180998
PHF13	1346.41	0.152342	0.0622467	2.44632	0.0144322	0.983876	1447.77	1419.84	1405.82	1138.19	1547.77	1436.25	1668.5	1300.32	1263.64	1392.67	1316.29	1314.08	1342.43	1182.52	1140.43	1226.04	0.703047	0.509374	0.41207	-1.44425	1.39668	0.623156	2.23414	-0.319723	-0.574113	0.320892	-0.208951	-0.224248	-0.0276026	-1.1368	-1.42872	-0.834947
CPT1A	3285.46	-0.17968	0.0737083	-2.44231	0.0145937	0.99154	3713.57	3134.3	2617.38	2272.85	3384.13	3335.5	3339.56	3381.89	3334.87	3432.51	3299.85	3081.14	3577.03	3783.82	3568.6	3310.44	1.12234	-0.396295	-1.75146	-2.65469	0.258658	0.131167	0.141821	0.252792	0.129515	0.385504	0.0377102	-0.53567	0.764367	1.3065	0.742274	0.0654707
MTF2	396.337	0.1807	0.0739884	2.4397	0.0146994	0.995368	418.617	351.716	355.793	462.834	454.036	441.403	462.618	395.312	385.089	420.046	382.242	400.951	368.565	356.21	316.911	369.055	0.50978	-1.02099	-0.927709	1.52154	1.32022	1.03117	1.51658	-0.023462	-0.257387	0.542484	-0.322529	0.105575	-0.635475	-0.918174	-1.81737	-0.624255
BEX1	32.9307	0.278899	0.113168	2.43814	0.0147632	0.996344	28.7874	16.872	15.3532	34.2403	27.573	39.1459	51.2596	64.882	45.6605	47.028	50.4296	22.4246	30.6364	37.5595	12.2747	2.76446	-0.249078	-0.96538	-1.05669	0.0787282	-0.322081	0.37363	1.10185	1.92078	0.765262	0.847473	1.05196	-0.631584	-0.137925	0.278266	-1.24175	-1.81347
A1BG	321.663	0.0757798	0.0961631	0.830041	0.406515	0.999738	205.11	896.812	262.339	164.117	148.894	230.826	594.611	628.084	234.904	232.468	229.491	230.525	324.003	184.163	244.379	335.882	-0.565769	2.79188	-0.28797	-0.764756	-0.838652	-0.440942	1.32494	1.48743	-0.421144	-0.432968	-0.447419	-0.442403	0.0113577	-0.667451	-0.375152	0.0690197
A1BG-AS1	163.999	0.0584429	0.0897924	0.654207	0.512978	0.999738	181.121	171.316	169.552	208.984	154.409	203.828	196.068	107.691	143.033	135.74	132.286	180.294	181.961	134.487	157.34	165.867	0.604618	0.258386	0.196117	1.58853	-0.338634	1.40648	1.13244	-1.98835	-0.740345	-0.997872	-1.11983	0.575411	0.634308	-1.04211	-0.235137	0.0659933
A1CF	3.51322	0.15684	0.0729125	2.27066	0.0231675	0.999738	2.39895	5.19139	5.34023	7.0842	3.6764	5.39943	2.56298	2.00666	1.65038	1.06882	7.30863	8.07285	1.85675	1.2116	0	1.38223	-0.439378	0.661734	0.720427	1.40811	0.0643464	0.743769	-0.374698	-0.594065	-0.734553	-0.963874	1.49661	1.79795	-0.653178	-0.907573	-1.38533	-0.84029
A2M	116.457	-0.0854822	0.115426	-0.903069	0.366489	0.999738	197.913	0	0.667529	0	172.791	174.132	139.682	147.155	228.853	181.165	219.99	0.896983	142.041	250.801	4.46354	2.76446	0.842511	-1.20453	-1.19763	-1.20453	0.582666	0.596533	0.24022	0.317512	1.16252	0.669279	1.07085	-1.19525	0.26462	1.38953	-1.15836	-1.17594
A2M-AS1	2.92587	0.0652477	0.0643933	0.992733	0.32084	0.999738	1.19947	0	1.33506	0	3.6764	5.39943	11.5334	4.01332	4.95114	3.20646	2.92345	1.79397	5.57025	1.2116	0	0	-0.571039	-0.967789	-0.526192	-0.967789	0.248252	0.818177	2.84711	0.359694	0.669896	0.0928091	-0.000799729	-0.3744	0.874678	-0.567029	-0.967789	-0.967789
A2ML1	0.307819	-0.0164319	0.0149975	-0.679315	0.496939	0.999738	0	0	0	0	0	0	0	0	0	0	0	0	3.7135	1.2116	0	0	-0.321599	-0.321599	-0.321599	-0.321599	-0.321599	-0.321599	-0.321599	-0.321599	-0.321599	-0.321599	-0.321599	-0.321599	3.55815	0.944241	-0.321599	-0.321599
A3GALT2	5.32194	-0.14175	0.0739847	-1.78535	0.0742041	0.999738	2.39895	10.3828	6.67529	2.3614	5.5146	1.34986	1.28149	7.35775	2.75063	3.74087	2.19259	2.69095	20.4242	2.4232	6.69531	6.91114	-0.607065	1.05107	0.281072	-0.614863	0.0400133	-0.824947	-0.839146	0.42281	-0.534025	-0.328367	-0.649923	-0.546421	3.13654	-0.602029	0.28523	0.330056
A4GALT	1113.79	0.0134052	0.111442	0.118485	0.905684	0.999738	626.126	1402.97	945.889	733.215	520.211	639.832	903.45	2145.79	1845.12	1524.67	1414.22	794.727	638.722	1787.11	877.086	1021.47	-0.966342	0.573043	-0.332706	-0.754137	-1.17622	-0.939181	-0.416802	2.04499	1.4492	0.814197	0.595332	-0.632245	-0.941382	1.33424	-0.469045	-0.182941
A4GNT	0.271492	-0.000518863	0.0231845	-0.0492858	0.960692	0.999738	1.19947	0	0.667529	0	0	0	0	0	0	0.53441	0.730863	0	0	1.2116	0	0	2.07755	-0.607812	0.88664	-0.607812	-0.607812	-0.607812	-0.607812	-0.607812	-0.607812	0.588615	1.02843	-0.607812	-0.607812	2.10469	-0.607812	-0.607812
AAAS	1450.23	-0.0417547	0.104263	-0.404147	0.686104	0.999738	1432.17	1658.65	1317.03	989.427	1270.2	1565.83	2090.11	1765.86	1411.07	1394.27	1295.82	1160.7	1666.43	1589.62	1201.81	1394.67	-0.0675454	0.779624	-0.498237	-1.72371	-0.673442	0.432438	2.39357	1.18067	-0.146466	-0.209309	-0.577591	-1.08305	0.808742	0.521398	-0.929261	-0.207835
AACS	869.225	0.0257204	0.1059	0.243189	0.807859	0.999738	753.27	1232.95	842.422	710.781	766.53	774.818	1137.96	1050.15	889.004	802.683	777.639	753.466	862.46	840.849	827.987	884.626	-0.787304	2.46962	-0.181988	-1.07579	-0.697274	-0.640999	1.82465	1.22844	0.134296	-0.451802	-0.621847	-0.785976	-0.0459337	-0.192669	-0.279998	0.104569
AADAC	256.606	0.0877288	0.110265	0.901575	0.367282	0.999738	136.74	133.678	532.688	520.689	161.762	105.289	83.2968	102.34	212.899	216.436	233.145	600.979	64.9862	189.009	409.53	402.229	-0.677368	-0.694671	1.56016	1.49235	-0.53597	-0.855101	-0.979379	-0.871767	-0.24699	-0.227003	-0.132576	1.94607	-1.08285	-0.381993	0.864181	0.822921
AADACL2-AS1	0.232006	-0.00200265	0.0187148	-0.158035	0.874429	0.999738	0	0	0	0	0	0	1.28149	0.668887	0.550127	0	0	0	0	1.2116	0	0	-0.518868	-0.518868	-0.518868	-0.518868	-0.518868	-0.518868	2.34711	0.977057	0.711457	-0.518868	-0.518868	-0.518868	-0.518868	2.1908	-0.518868	-0.518868
AADACP1	14.1966	-0.0229955	0.0909615	-0.103583	0.9175	0.999738	5.99737	6.48923	35.379	48.4087	1.8382	4.04957	0	3.34443	4.95114	5.87851	5.11604	31.3944	4.64187	2.4232	36.8242	30.409	-0.511223	-0.480555	1.32074	2.13314	-0.770549	-0.632669	-0.885161	-0.676635	-0.576456	-0.518634	-0.566174	1.07229	-0.595739	-0.734074	1.41084	1.01085
AADAT	124.488	-0.0947017	0.0869225	-1.09542	0.273334	0.999738	143.937	75.2751	106.137	97.9981	143.38	151.184	138.401	123.744	136.431	136.809	130.094	100.462	150.397	145.392	107.125	105.049	0.853257	-2.15911	-0.805118	-1.1622	0.828808	1.1712	0.610374	-0.0326586	0.523969	0.540529	0.245918	-1.0541	1.13666	0.917082	-0.761779	-0.85284
AAED1	143.494	-0.00668332	0.108051	-0.0640073	0.948964	0.999738	169.126	195.975	100.797	118.07	152.571	160.633	133.275	161.871	135.331	141.619	141.788	118.402	193.102	145.392	110.473	117.489	0.9204	1.88452	-1.53323	-0.912967	0.325918	0.615428	-0.366975	0.659867	-0.293137	-0.0673628	-0.0612948	-0.901055	1.78136	0.0681285	-1.18578	-0.933815
AAGAB	834.138	0.0372182	0.0735463	0.50724	0.611986	0.999738	903.204	789.091	891.151	1070.89	878.66	786.967	848.346	665.542	760.825	759.396	798.103	892.498	816.97	789.962	822.407	872.186	0.777274	-0.506956	0.641631	2.66446	0.501054	-0.530861	0.159899	-1.89737	-0.82506	-0.841142	-0.405535	0.656785	-0.193208	-0.497156	-0.132014	0.428198
AAK1	3593.57	-0.0446448	0.0819199	-0.546436	0.584766	0.999738	4418.86	2940.92	3204.81	3603.5	4264.63	4337.09	3378.01	2908.99	3311.76	3493.97	3623.62	3464.15	4351.29	3551.19	3752.72	2891.62	1.60268	-1.26741	-0.754959	0.0192761	1.30316	1.44388	-0.418616	-1.32943	-0.547259	-0.19342	0.0583568	-0.251332	1.47146	-0.0822957	0.309063	-1.36315
AAMDC	165.616	0.0580725	0.0913997	0.638711	0.523011	0.999738	159.53	166.124	177.563	223.152	136.027	183.581	180.69	153.844	133.131	139.481	155.674	187.469	149.468	150.238	156.224	197.659	-0.248709	0.0207794	0.488231	2.35134	-1.20922	0.734162	0.616032	-0.481087	-1.32758	-1.06806	-0.4063	0.893087	-0.659904	-0.628445	-0.383824	1.30949
AAMP	2547.31	0.0306562	0.114967	0.271768	0.7858	0.999738	2030.71	4663.16	2350.37	1833.63	2001.8	2209.72	4371.16	3208.65	1962.3	2047.86	1931.67	2180.57	2780.48	2073.04	2303.19	2808.69	-0.603821	2.47308	-0.230192	-0.834178	-0.637611	-0.394593	2.13177	0.772992	-0.68378	-0.583779	-0.71958	-0.428666	0.272537	-0.554341	-0.285342	0.305505
AANAT	1.89119	0.111305	0.0601265	2.03048	0.0423083	0.999738	0	5.19139	2.67012	3.5421	0	1.34986	2.56298	3.34443	1.65038	1.60323	0.730863	5.3819	0	0	2.23177	0	-1.04903	1.8306	0.432067	0.915751	-1.04903	-0.300273	0.372638	0.806106	-0.133575	-0.159729	-0.643625	1.93628	-1.04903	-1.04903	0.188919	-1.04903
AAR2	562.024	-0.0789071	0.089408	-0.880513	0.378581	0.999738	568.551	645.03	636.155	445.124	420.948	585.838	545.914	507.016	548.476	498.604	564.227	613.536	565.38	500.39	679.574	667.616	0.0864595	1.0995	0.981951	-1.54846	-1.8687	0.315445	-0.213385	-0.728636	-0.179452	-0.840061	0.0291792	0.682338	0.0444593	-0.816407	1.55708	1.39869
AARS	4293.89	-0.0326704	0.0729645	-0.450343	0.652463	0.999738	4752.32	3489.91	4033.21	3511.4	5132.26	4806.84	4656.93	4025.36	4132.55	4341.01	4244.86	4426.61	4093.2	4858.51	4161.14	4036.11	0.992828	-1.74119	-0.564552	-1.69464	1.81567	1.11091	0.786249	-0.581556	-0.349411	0.10205	-0.106191	0.287439	-0.434625	1.2228	-0.287504	-0.558278
AARS2	1394.21	0.00379482	0.110559	0.0364238	0.970944	0.999738	1282.24	1980.51	1297.01	1101.59	1345.56	1308.01	2074.73	1634.09	1258.14	1091.26	1064.87	1270.13	1538.32	1149.81	1354.68	1556.39	-0.376836	1.9732	-0.327126	-0.984795	-0.163718	-0.290097	2.29029	0.807315	-0.457941	-1.01956	-1.10839	-0.417594	0.484992	-0.822535	-0.13302	0.545815
AARSD1	325.628	0.0514819	0.111497	0.461049	0.644764	0.999738	304.667	455.544	276.357	348.307	347.42	357.712	547.196	321.734	250.858	248.5	223.644	287.035	349.069	289.572	249.958	352.468	-0.25345	1.57088	-0.595753	0.274222	0.263502	0.38795	2.67909	-0.0470736	-0.904078	-0.93258	-1.23313	-0.466647	0.28344	-0.435967	-0.914953	0.324544
AASDH	166.834	0.0214845	0.115375	0.180157	0.857029	0.999738	178.722	85.6579	146.189	200.719	224.261	203.828	106.364	114.38	205.747	195.594	205.373	162.354	146.683	204.76	133.906	154.81	0.283898	-1.93865	-0.493049	0.809237	1.37145	0.883496	-1.44415	-1.25272	0.929322	0.686839	0.920374	-0.106997	-0.481244	0.905743	-0.786383	-0.287169
AASDHPPT	436.031	-0.0378357	0.0765229	-0.494391	0.62103	0.999738	442.606	360.801	441.237	502.978	466.903	450.852	445.958	386.616	426.348	420.58	426.093	417.097	404.771	459.195	429.616	494.838	0.181312	-2.07441	0.143553	1.84604	0.851287	0.408696	0.273746	-1.36257	-0.266994	-0.426037	-0.274016	-0.522087	-0.86196	0.638755	-0.17689	1.62157
AASS	607.841	0.00758895	0.102029	0.0785604	0.937382	0.999738	525.37	473.714	670.199	781.623	549.622	556.141	388.291	513.036	707.463	717.712	688.473	683.501	438.193	730.593	673.995	627.532	-0.705515	-1.14741	0.533452	1.48665	-0.498045	-0.442276	-1.87818	-0.811027	0.852229	0.939908	0.689782	0.647244	-1.45128	1.0501	0.56592	0.168447
AATBC	49.0031	-0.0504422	0.111214	-0.449711	0.652919	0.999738	38.3832	63.5945	39.3842	54.3122	62.4988	31.0467	30.7557	70.2331	31.9073	47.5624	53.353	52.025	90.9807	38.7711	50.2148	29.0268	-0.625469	0.85937	-0.566512	0.312683	0.794841	-1.05756	-1.07469	1.25036	-1.00687	-0.0848488	0.256192	0.177977	2.4723	-0.602621	0.071365	-1.17652
AATF	761.939	0.0591495	0.0729258	0.808847	0.418603	0.999738	972.774	656.71	624.807	710.781	999.981	943.55	1216.13	727.749	604.039	633.81	638.044	603.669	1039.78	608.222	595.883	615.092	1.04914	-0.523632	-0.682387	-0.254567	1.18453	0.903723	2.26014	-0.170137	-0.785734	-0.63759	-0.61652	-0.787572	1.38257	-0.764918	-0.826321	-0.730733
AATK	20.5848	0.0179901	0.0873135	0.303853	0.76124	0.999738	15.5932	50.616	16.0207	16.5298	27.573	16.1983	23.0668	26.0866	10.4524	14.4291	19.7333	8.07285	57.5592	6.05799	8.92708	12.4401	-0.34463	2.07341	-0.315112	-0.279963	0.482481	-0.302851	0.171364	0.379855	-0.699557	-0.425002	-0.0587862	-0.863847	2.55279	-1.00296	-0.804869	-0.562326
AATK-AS1	1.55321	0.0315105	0.0558617	0.504275	0.614068	0.999738	2.39895	2.59569	0.667529	1.1807	1.8382	2.69971	0	2.67555	1.65038	2.67205	2.19259	0	1.85675	2.4232	0	0	0.781901	0.963795	-0.818821	-0.344387	0.263482	1.05996	-1.43596	1.03762	0.0898384	1.03439	0.59112	-1.43596	0.28063	0.804317	-1.43596	-1.43596
ABALON	319.627	0.0538406	0.110873	0.494737	0.620786	0.999738	278.278	507.458	307.731	270.38	294.112	319.916	362.661	379.259	285.516	270.411	256.533	325.605	358.353	208.395	302.405	387.024	-0.597117	2.71243	-0.171794	-0.711167	-0.36846	0.00417118	0.621448	0.861126	-0.4926	-0.71072	-0.911132	0.0863196	0.559225	-1.60629	-0.248706	0.973264
ABAT	43.8177	0.0944032	0.115265	0.872305	0.383042	0.999738	28.7874	55.8074	91.4515	49.5894	22.0584	31.0467	33.3187	32.1066	44.0101	33.1334	41.6592	53.819	12.0689	32.7131	81.4596	58.0536	-0.720612	0.574835	2.28375	0.276719	-1.04323	-0.612291	-0.503362	-0.561478	0.00922603	-0.512247	-0.103486	0.479501	-1.52216	-0.532396	1.8047	0.682526
ABCA1	10032.7	0.00135685	0.0673103	0.0200795	0.98398	0.999738	9074.02	8933.08	9543.66	9955.66	10060.5	9758.12	9620.14	9596.52	10644.9	10954.9	11567.4	10762.9	8826.99	10915.3	11219.1	9089.54	-1.09707	-1.25837	-0.559616	-0.0881234	0.031822	-0.314195	-0.472097	-0.499132	0.700695	1.05536	1.75632	0.835676	-1.37978	1.01007	1.35776	-1.07932
ABCA10	51.1971	0.0472315	0.113833	0.459108	0.646157	0.999738	34.7848	33.744	78.7684	97.9981	60.6606	45.8951	24.3483	21.4044	41.2595	37.9431	41.6592	86.1104	37.135	26.6551	74.7643	76.0226	-0.677342	-0.720294	1.13788	1.9315	0.390565	-0.218812	-1.10806	-1.22956	-0.410127	-0.546997	-0.39363	1.44089	-0.580347	-1.01285	0.972629	1.02456
ABCA11P	81.4913	-0.131535	0.104976	-1.25999	0.207674	0.999738	83.9632	85.6579	51.3997	67.2999	95.5864	112.038	97.3932	77.5908	74.2671	84.9711	69.432	58.3039	111.405	83.6002	62.4896	88.4626	0.141363	0.238277	-1.72087	-0.811573	0.806068	1.7469	0.909391	-0.223058	-0.413136	0.199002	-0.689642	-1.32603	1.71069	0.120605	-1.08667	0.398674
ABCA12	1.55023	0.0159781	0.051081	0.392157	0.694942	0.999738	3.59842	0	2.00259	1.1807	0	2.69971	1.28149	0.668887	1.10025	0.53441	3.65432	2.69095	0.928375	0	4.46354	0	1.39889	-1.05879	0.308956	-0.252383	-1.05879	0.785085	-0.183545	-0.601945	-0.307327	-0.693791	1.43707	0.779098	-0.424718	-1.05879	1.98976	-1.05879
ABCA17P	3.51822	-0.0618444	0.0727712	-0.785446	0.432192	0.999738	8.39632	3.89354	0.667529	3.5421	3.6764	6.74929	5.12596	1.33777	2.75063	0.53441	1.46173	1.79397	9.28375	4.84639	2.23177	0	1.75718	0.135197	-1.02687	0.00860141	0.0569793	1.16389	0.579136	-0.785438	-0.2765	-1.07482	-0.740787	-0.621109	2.07685	0.478431	-0.463404	-1.26733
ABCA2	4075.26	-0.0507653	0.110828	-0.448051	0.654117	0.999738	2786.38	6864.31	4747.47	2973	2397.01	2601.17	3686.84	5109.62	4372.96	3748.35	3864.08	4395.22	3047.85	4166.68	5326.12	5117.01	-1.07974	2.3365	0.563139	-0.923401	-1.40593	-1.2349	-0.325387	0.866533	0.249396	-0.273863	-0.176914	0.268044	-0.860695	0.0765938	1.0479	0.87272
ABCA3	240.594	-0.068115	0.110244	-0.627612	0.530258	0.999738	151.134	288.122	215.612	173.563	148.894	117.438	214.009	315.046	377.937	306.217	309.886	231.422	181.033	245.954	262.233	311.001	-1.20802	0.641797	-0.337342	-0.905149	-1.23826	-1.66304	-0.358991	1.00536	1.85461	0.886138	0.935688	-0.123856	-0.804276	0.0723865	0.292205	0.950749
ABCA4	8.46557	0.0532079	0.0824359	0.838693	0.401642	0.999738	0	22.0634	20.0259	33.0596	0	0	0	0	0.550127	2.67205	3.65432	18.8366	0	1.2116	22.3177	11.0578	-0.766112	1.23057	1.04618	2.2257	-0.766112	-0.766112	-0.766112	-0.766112	-0.716327	-0.524299	-0.435406	0.938555	-0.766112	-0.656466	1.25358	0.234593
ABCA5	53.9534	0.0548375	0.10595	0.522153	0.601564	0.999738	31.1863	16.872	66.7529	88.5525	45.955	39.1459	12.8149	37.4576	86.92	84.4367	88.4345	66.3767	29.708	77.5422	46.8672	44.2313	-0.875209	-1.42548	0.492039	1.33006	-0.307472	-0.569229	-1.58144	-0.634127	1.2673	1.17184	1.32552	0.477578	-0.932039	0.906803	-0.272407	-0.373734
ABCA6	433.468	0.0161007	0.115066	0.156003	0.876031	0.999738	347.848	231.017	433.894	680.083	422.786	317.216	193.505	312.37	542.975	593.729	598.577	497.825	248.804	482.216	532.277	500.367	-0.591019	-1.39748	0.00293922	1.70233	-0.0737348	-0.80246	-1.65641	-0.835913	0.755901	1.10625	1.13971	0.444245	-1.27469	0.336495	0.682057	0.461787
ABCA7	385.264	-0.0180685	0.115088	-0.179806	0.857305	0.999738	137.94	406.226	281.03	174.744	161.762	144.435	246.046	1001.32	768.527	603.348	584.691	226.04	191.245	653.051	270.044	313.766	-0.95267	0.0807458	-0.401499	-0.810904	-0.86091	-0.927652	-0.536254	2.37301	1.4763	0.840044	0.768176	-0.613316	-0.747342	1.03149	-0.443815	-0.275403
ABCA8	1160.84	-0.0346147	0.0961305	-0.354927	0.722644	0.999738	843.231	922.769	1263.63	1412.12	961.379	838.261	891.916	1105.67	1418.23	1445.04	1486.58	1105.98	702.78	1629.6	1249.79	1296.53	-1.14091	-0.855198	0.369232	0.90261	-0.716506	-1.15876	-0.966025	-0.198194	0.924554	1.02089	1.17008	-0.197079	-1.64543	1.68383	0.319512	0.487406
ABCA9	225.4	0.0337857	0.114257	0.343816	0.730985	0.999738	81.5643	240.102	322.417	408.522	132.35	83.6911	76.8894	149.831	221.151	262.929	295.269	322.017	64.9862	205.972	402.834	335.882	-1.22798	0.12551	0.828263	1.56338	-0.794402	-1.20982	-1.26789	-0.645168	-0.0362798	0.3204	0.596493	0.824851	-1.36952	-0.165871	1.51482	0.943219
ABCB1	56.1466	-0.197092	0.11527	-1.77166	0.0764512	0.999738	85.1627	7.78708	9.34541	7.0842	86.3954	87.7407	44.8521	70.902	75.3673	105.279	76.7407	7.17586	74.27	136.911	12.2747	11.0578	0.690975	-1.15161	-1.1145	-1.16835	0.720331	0.752367	-0.26896	0.351378	0.457713	1.17001	0.490417	-1.16616	0.431581	1.92327	-1.04474	-1.07372
ABCB10	642.789	0.00989967	0.106015	0.0920667	0.926645	0.999738	756.868	885.131	499.979	486.448	619.474	781.567	918.828	670.893	545.726	505.017	530.607	557.026	809.543	541.584	603.694	572.243	0.798364	1.69599	-0.999432	-1.09413	-0.16317	0.971215	1.93181	0.196681	-0.679285	-0.964176	-0.78509	-0.600198	1.167	-0.708268	-0.273603	-0.493709
ABCB11	2.63178	0.0205354	0.0595442	0.388768	0.697448	0.999738	1.19947	0	0.667529	2.3614	1.8382	1.34986	6.40745	2.67555	3.30076	3.74087	5.11604	3.58793	0	8.48118	0	1.38223	-0.591906	-1.08759	-0.811735	-0.111735	-0.32795	-0.52976	1.56031	0.0180869	0.276459	0.458336	1.02663	0.395134	-1.08759	2.41729	-1.08759	-0.516382
ABCB4	6.79954	-0.0224336	0.0949364	-0.255988	0.79796	0.999738	11.9947	2.59569	4.6727	4.7228	11.0292	6.74929	2.56298	8.69553	8.80202	5.87851	8.0395	6.27888	10.2121	8.48118	6.69531	1.38223	1.68005	-1.35946	-0.687789	-0.671589	1.36781	-0.0162525	-1.37004	0.613134	0.647574	-0.297851	0.400984	-0.168375	1.10358	0.543818	-0.0337074	-1.75188
ABCB6	1243.97	-0.062886	0.114429	-0.546998	0.58438	0.999738	910.401	1849.43	1172.18	779.262	733.442	1028.59	1436.55	1773.89	1418.23	1269.22	1156.23	1099.7	1101.05	1502.38	1199.58	1473.46	-1.04609	1.89872	-0.225144	-1.45734	-1.60103	-0.675443	0.603917	1.66181	0.546455	0.0791794	-0.275179	-0.452442	-0.448204	0.810366	-0.139232	0.719656
ABCB7	358.372	-0.032848	0.11534	-0.279176	0.78011	0.999738	382.632	181.699	426.551	469.919	334.553	377.96	198.631	258.19	419.747	399.204	366.893	412.612	284.083	434.964	377.169	409.14	0.285701	-2.08055	0.8029	1.31361	-0.280499	0.230678	-1.88115	-1.17976	0.722768	0.480853	0.100356	0.638751	-0.874846	0.901967	0.221365	0.597859
ABCB8	1262.45	-0.0160972	0.110945	-0.143605	0.885812	0.999738	1063.93	1816.99	1278.99	876.079	1036.75	1147.38	1554.45	1636.1	1258.14	1096.07	1136.49	1144.55	1344.29	1078.32	1369.19	1361.5	-0.808286	2.25787	0.0673271	-1.57316	-0.918988	-0.46853	1.1889	1.52135	-0.0175519	-0.677423	-0.512853	-0.480046	0.333208	-0.749704	0.43461	0.403276
ABCB9	261.319	-0.067818	0.112519	-0.598578	0.549454	0.999738	160.73	390.652	298.386	162.937	147.056	188.98	242.201	353.172	320.724	258.12	284.306	257.434	213.526	329.555	302.405	270.917	-1.39678	1.79592	0.514709	-1.36613	-1.58665	-1.00449	-0.265461	1.27547	0.824897	-0.0444196	0.319199	-0.0539417	-0.663646	0.947521	0.570521	0.133279
ABCC1	7294.4	-0.0436583	0.0646738	-0.679618	0.496747	0.999738	8053.27	5984.37	5460.39	4761.76	7896.91	7926.36	7736.35	8464.09	8886.19	8567.65	8494.83	5867.16	7247.82	9978.72	6067.07	5317.43	0.499292	-0.861919	-1.20667	-1.66632	0.396417	0.415793	0.290777	0.769586	1.0473	0.837725	0.789808	-0.939034	-0.0306457	1.76612	-0.80751	-1.30072
ABCC10	1574.58	-0.0520327	0.104808	-0.497095	0.619122	0.999738	1333.82	2068.77	1462.56	1120.48	1402.55	1460.55	2004.25	1876.23	1637.18	1482.45	1394.49	1421.72	1657.15	1533.88	1677.18	1660.06	-0.965039	1.98081	-0.449018	-1.82012	-0.689547	-0.457078	1.72221	1.20906	0.250898	-0.369271	-0.721853	-0.612708	0.330951	-0.163127	0.411222	0.342607
ABCC11	0.66948	-0.00178446	0.028241	-0.126264	0.899523	0.999738	1.19947	0	1.33506	0	0	0	0	0.668887	0	1.06882	3.65432	0	2.78512	0	0	0	0.474034	-0.598792	0.595302	-0.598792	-0.598792	-0.598792	-0.598792	-0.000530767	-0.598792	0.357174	2.66968	-0.598792	1.89226	-0.598792	-0.598792	-0.598792
ABCC12	0.237289	-0.000374598	0.0186666	-0.0753876	0.939906	0.999738	0	0	0	0	0	0	0	0.668887	0.550127	0	1.46173	0	0	0	1.11589	0	-0.511276	-0.511276	-0.511276	-0.511276	-0.511276	-0.511276	-0.511276	0.929943	0.674056	-0.511276	2.63824	-0.511276	-0.511276	-0.511276	1.89307	-0.511276
ABCC2	20.6417	-0.172587	0.113822	-1.4886	0.136592	0.999738	19.1916	20.7655	27.3687	16.5298	12.8674	17.5481	10.2519	13.3777	13.203	19.2387	22.6568	31.3944	14.854	32.7131	27.8971	30.409	-0.198657	0.0169678	0.921569	-0.56331	-1.06504	-0.423802	-1.42335	-0.99513	-1.01906	-0.192197	0.276056	1.47307	-0.792888	1.65373	0.993962	1.33808
ABCC3	664.099	-0.0794023	0.0752559	-1.05801	0.290052	0.999738	443.806	656.71	663.524	543.122	474.256	561.541	599.737	841.459	848.845	802.149	825.145	615.33	567.237	792.385	713.051	677.292	-1.68861	-0.0566372	-0.00441007	-0.927325	-1.4552	-0.786142	-0.493356	1.35952	1.41613	1.05819	1.23446	-0.373829	-0.742478	0.983346	0.375226	0.101127
ABCC4	2311.92	-0.060617	0.104163	-0.590249	0.555024	0.999738	2664.03	1238.15	1861.07	2068.59	2873.11	2919.74	1847.91	2127.06	2810.05	3024.76	2640.61	1680.05	2595.74	3141.67	1807.73	1690.47	0.601144	-1.8332	-0.769712	-0.415431	0.958088	1.0377	-0.792185	-0.315604	0.850426	1.21699	0.561155	-1.07876	0.484544	1.41659	-0.860772	-1.06098
ABCC5	729.724	-0.0234249	0.0956501	-0.242413	0.80846	0.999738	741.275	608.69	746.965	868.995	751.824	732.972	639.463	534.44	733.869	770.619	714.054	818.048	598.802	759.672	915.026	740.875	0.1181	-1.23748	0.176273	1.42394	0.225954	0.0332098	-0.92285	-1.99663	0.0423741	0.418112	-0.160221	0.903045	-1.33858	0.306189	1.89456	0.114003
ABCC5-AS1	0.647351	0.000565747	0.0209709	0.0542755	0.956716	0.999738	0	0	0	0	1.8382	2.69971	0	0	0	0	0	3.58793	0	0	2.23177	0	-0.536776	-0.536776	-0.536776	-0.536776	0.987439	1.7018	-0.536776	-0.536776	-0.536776	-0.536776	-0.536776	2.4383	-0.536776	-0.536776	1.31378	-0.536776
ABCC6	24.8245	-0.0186006	0.0984351	-0.170144	0.864897	0.999738	59.9737	6.48923	4.6727	12.9877	23.8966	17.5481	28.1928	46.1532	23.1053	40.0807	20.4642	10.7638	40.8485	54.5219	3.34766	4.14669	1.9029	-0.992634	-1.09098	-0.640821	-0.0502365	-0.393929	0.182348	1.15469	-0.0930756	0.825936	-0.236061	-0.761219	0.867501	1.60775	-1.16271	-1.11945
ABCC6P1	0.833758	-0.0153122	0.0333159	-0.614784	0.538698	0.999738	1.19947	0	0	0	0	0	0	1.33777	3.85089	2.67205	0	0	1.85675	2.4232	0	0	0.292842	-0.667619	-0.667619	-0.667619	-0.667619	-0.667619	-0.667619	0.403583	2.41592	1.47198	-0.667619	-0.667619	0.819145	1.27272	-0.667619	-0.667619
ABCC6P2	1.57745	0.0858827	0.0469368	2.41867	0.0155773	0.999738	2.39895	0	0.667529	3.5421	1.8382	1.34986	2.56298	2.67555	6.05139	0	1.46173	2.69095	0	0	0	0	0.480421	-0.922512	-0.532133	1.14895	0.152489	-0.1331	0.576347	0.642178	2.61641	-0.922512	-0.0676772	0.651186	-0.922512	-0.922512	-0.922512	-0.922512
ABCC8	0.162231	0.000925895	0.0149914	0.121475	0.903315	0.999738	0	2.59569	0	0	0	0	0	0	0	0	0	0	0	0	0	0	-0.25	3.75	-0.25	-0.25	-0.25	-0.25	-0.25	-0.25	-0.25	-0.25	-0.25	-0.25	-0.25	-0.25	-0.25	-0.25
ABCC9	295.142	-0.00974349	0.114987	-0.0774845	0.938238	0.999738	320.26	185.592	333.765	382.547	272.054	276.721	169.157	201.335	337.228	331.868	306.963	385.703	208.884	393.769	330.302	286.121	0.350001	-1.5265	0.538182	1.21793	-0.321714	-0.256683	-1.75551	-1.30713	0.586436	0.511759	0.164717	1.2619	-1.20193	1.3743	0.489933	-0.125692
ABCD1	1177.09	-0.00455271	0.104089	-0.0490242	0.9609	0.999738	969.175	1318.61	1084.07	776.901	911.748	1112.28	1414.76	1692.95	1501.3	1295.94	1165.73	985.784	1198.53	1350.93	1022.15	1032.52	-0.867897	0.590778	-0.388297	-1.67052	-1.10762	-0.270517	0.99215	2.15341	1.35336	0.496149	-0.0474192	-0.798566	0.0895182	0.725689	-0.646759	-0.603454
ABCD2	0.280166	0.0110273	0.0234293	0.476264	0.633886	0.999738	0	1.29785	0	0	0	0	0	0.668887	0.550127	1.06882	0	0.896983	0	0	0	0	-0.613763	2.22944	-0.613763	-0.613763	-0.613763	-0.613763	-0.613763	0.851573	0.591404	1.72771	-0.613763	1.35127	-0.613763	-0.613763	-0.613763	-0.613763
ABCD3	833.039	0.0292069	0.115399	0.252333	0.800783	0.999738	1105.92	432.183	893.821	1119.3	930.13	997.544	535.662	543.136	930.264	949.646	787.14	885.322	726.917	911.121	923.953	656.559	1.34829	-1.98063	0.300328	1.41444	0.479727	0.812824	-1.46934	-1.43241	0.480391	0.576156	-0.226785	0.258333	-0.524346	0.385807	0.449207	-0.871988
ABCD4	370.71	-0.08912	0.094815	-0.944881	0.344719	0.999738	286.674	354.312	333.097	283.368	318.009	409.007	397.262	497.652	432.399	361.261	393.935	318.429	324.931	454.349	407.298	359.379	-1.38575	-0.270403	-0.62024	-1.44027	-0.869046	0.63151	0.437834	2.09326	1.01726	-0.155819	0.382984	-0.862117	-0.754896	1.37921	0.603334	-0.186843
ABCE1	1523.96	-0.0223248	0.114793	-0.197771	0.843224	0.999738	2180.64	747.56	1630.77	1806.47	2158.05	1849.3	1030.32	734.437	1219.08	1423.13	1379.87	2004.76	1289.51	1536.31	1876.92	1516.3	1.45989	-1.72605	0.23745	0.62805	1.40965	0.723274	-1.09745	-1.75523	-0.6778	-0.224164	-0.320342	1.06887	-0.52122	0.0274356	0.784665	-0.0170292
ABCF1	2864.57	-0.00893668	0.0479377	-0.186355	0.852166	0.999738	3016.68	2882.52	2723.52	2865.56	3233.4	3253.16	3585.61	2660.16	2418.36	2497.3	2384.08	2838.05	3231.67	2560.11	2812.03	2870.89	0.453455	0.053512	-0.420475	0.00295725	1.0995	1.15841	2.14947	-0.609346	-1.33019	-1.09486	-1.43238	-0.0790382	1.09437	-0.907621	-0.156616	0.0188459
ABCF2	1931.97	-0.0693819	0.0825691	-0.842617	0.399443	0.999738	2481.71	1554.82	1877.76	1860.78	2461.35	2228.61	1808.18	1486.93	1752.7	1852.26	1740.19	1859.45	2058.21	1911.9	2015.29	1961.38	1.99521	-1.36881	-0.196753	-0.258364	1.92131	1.07662	-0.449276	-1.61519	-0.650625	-0.289286	-0.696055	-0.26322	0.458154	-0.0728404	0.302388	0.106745
ABCF3	1706.73	-0.0266714	0.0952102	-0.275721	0.782762	0.999738	1472.95	2343.91	1949.18	1609.29	1542.25	1490.24	2092.67	1763.85	1450.13	1411.38	1311.17	1748.22	1683.14	1524.19	1809.97	2105.13	-0.803552	2.19016	0.83338	-0.334916	-0.565364	-0.74413	1.32658	0.196347	-0.881995	-1.01522	-1.35965	0.142608	-0.0810773	-0.627443	0.354845	1.36942
ABCG1	372.202	0.0706002	0.10294	0.724975	0.468467	0.999738	291.472	642.434	572.072	491.171	354.773	380.66	431.862	163.877	145.233	102.607	165.175	584.833	306.364	115.102	650.561	557.038	-0.412212	1.37982	1.02055	0.607465	-0.0889956	0.043185	0.304627	-1.06372	-1.15892	-1.37657	-1.0571	1.08571	-0.336176	-1.31277	1.42132	0.943786
ABCG2	149.389	0.0566279	0.112522	0.461189	0.644663	0.999738	266.283	23.3612	39.3842	30.6982	277.568	283.47	178.127	139.128	193.094	218.574	214.143	36.7763	219.096	214.453	25.6654	30.409	1.15666	-1.24704	-1.0885	-1.17444	1.26832	1.32672	0.284356	-0.101533	0.432458	0.684572	0.640732	-1.1143	0.689746	0.643797	-1.22424	-1.1773
ABCG4	10.3364	-0.103268	0.104617	-0.978377	0.327888	0.999738	7.19685	7.78708	9.34541	12.9877	11.0292	5.39943	14.0964	6.68887	10.4524	14.9635	8.77036	8.07285	10.2121	16.9624	14.5065	6.91114	-0.909588	-0.738585	-0.287106	0.768141	0.200725	-1.43034	1.08935	-1.05676	0.0336136	1.34056	-0.453709	-0.655793	-0.0360013	1.91968	1.20817	-0.992362
ABCG5	0.322578	-0.00338489	0.0154099	-0.182549	0.855152	0.999738	0	1.29785	0	0	0	0	0	2.00666	0	0	0	0	1.85675	0	0	0	-0.456387	1.37982	-0.456387	-0.456387	-0.456387	-0.456387	-0.456387	2.38265	-0.456387	-0.456387	-0.456387	-0.456387	2.17056	-0.456387	-0.456387	-0.456387
ABCG8	0.866025	-0.0490906	0.0331949	-1.63272	0.102528	0.999738	0	0	0	0	1.8382	2.69971	1.28149	1.33777	0	0	0	0	0.928375	2.4232	3.34766	0	-0.749254	-0.749254	-0.749254	-0.749254	0.841091	1.58644	0.359445	0.408139	-0.749254	-0.749254	-0.749254	-0.749254	0.0539425	1.34721	2.14702	-0.749254
ABHD1	1.49319	-0.0165138	0.0518786	-0.27819	0.780867	0.999738	1.19947	2.59569	2.00259	0	3.6764	2.69971	1.28149	2.67555	0	0.53441	0.730863	0	2.78512	1.2116	1.11589	1.38223	-0.258812	0.971493	0.448866	-1.31575	1.92378	1.06315	-0.186543	1.04186	-1.31575	-0.844846	-0.671737	-1.31575	1.13841	-0.248129	-0.332468	-0.0977743
ABHD10	571.911	0.0489421	0.0696768	0.701885	0.482751	0.999738	668.107	538.606	532.688	644.662	632.341	589.888	607.426	567.885	582.034	546.167	516.72	517.559	538.457	576.72	570.217	521.1	2.05281	-0.710719	-0.837012	1.5525	1.28957	0.383614	0.757879	-0.0859246	0.216017	-0.549386	-1.17776	-1.15987	-0.713901	0.10263	-0.0361478	-1.0843
ABHD11	337.365	-0.0148613	0.0965231	-0.161113	0.872005	0.999738	417.417	314.079	241.646	206.623	468.741	390.109	467.744	424.743	336.677	301.941	298.192	230.525	491.11	315.015	255.538	237.743	0.850643	-0.247443	-1.01713	-1.38929	1.39602	0.56046	1.38542	0.928489	-0.00730811	-0.376418	-0.416257	-1.1353	1.63372	-0.237492	-0.869511	-1.0586
ABHD11-AS1	5.66884	-0.0289497	0.0776613	-0.399427	0.689578	0.999738	0	11.6806	2.00259	1.1807	0	0	3.84447	15.3844	6.60152	10.1538	8.0395	6.27888	0.928375	12.116	5.57943	6.91114	-1.16294	1.2333	-0.752119	-0.920727	-1.16294	-1.16294	-0.374263	1.99312	0.191337	0.920073	0.486334	0.125149	-0.972491	1.32261	-0.0183422	0.254856
ABHD12	1742.65	0.0478011	0.114986	0.408114	0.68319	0.999738	1654.08	2319.25	1405.82	928.03	1748.13	1610.38	2893.6	2483.58	1710.34	1701.03	1634.21	1327.53	2055.42	1610.21	1301.12	1499.72	-0.1817	1.18278	-0.690956	-1.67104	0.0112329	-0.271334	2.36095	1.51986	-0.0662773	-0.0853909	-0.222449	-0.851536	0.641584	-0.271675	-0.905717	-0.498335
ABHD12B	0.599338	-0.00312264	0.0322844	-0.289605	0.772119	0.999738	1.19947	0	0	0	0	2.69971	0	0	1.10025	0.53441	1.46173	0	0	1.2116	0	1.38223	0.735337	-0.734358	-0.734358	-0.734358	-0.734358	2.57355	-0.734358	-0.734358	0.613763	-0.0795554	1.05667	-0.734358	-0.734358	0.750191	-0.734358	0.959263
ABHD13	199.085	-0.0219326	0.109044	-0.192887	0.847047	0.999738	221.903	171.316	215.612	264.477	204.04	184.93	131.993	130.433	169.439	202.007	203.18	243.082	149.468	192.644	235.452	265.388	0.544487	-0.662655	0.39437	1.56042	0.11824	-0.337773	-1.60099	-1.63823	-0.707441	0.0697157	0.0977122	1.04989	-1.18399	-0.153706	0.867802	1.58216
ABHD14A	109.523	-0.0398629	0.114884	-0.359757	0.719029	0.999738	68.37	111.615	140.849	61.3964	38.6022	64.7931	61.5115	177.255	188.143	126.121	138.864	129.166	77.9835	124.795	111.589	131.312	-0.946952	0.0481409	0.720832	-1.10742	-1.63193	-1.02926	-1.10477	1.55857	1.80912	0.38193	0.675165	0.451995	-0.725741	0.351416	0.0475353	0.501381
ABHD14B	659.69	0.00696839	0.0935514	0.070198	0.944036	0.999738	521.771	717.709	612.792	506.52	431.977	541.293	712.508	847.479	917.061	777.031	847.802	557.026	599.73	804.501	566.87	592.976	-0.950917	0.400025	-0.323355	-1.05607	-1.57003	-0.816322	0.364164	1.29476	1.7745	0.809037	1.29698	-0.707843	-0.413412	0.998431	-0.639976	-0.459978
ABHD15	738.836	-0.0346917	0.11527	-0.311712	0.755259	0.999738	665.708	1001.94	547.374	344.764	544.107	711.375	975.213	1145.13	864.249	760.465	756.444	552.541	824.397	825.098	605.926	696.643	-0.362165	1.30301	-0.948216	-1.95164	-0.964393	-0.136002	1.17066	2.01219	0.621107	0.107117	0.0872021	-0.922624	0.423739	0.427212	-0.658239	-0.20896
ABHD16A	920.844	-0.0532516	0.100874	-0.525525	0.599218	0.999738	729.281	1181.04	982.603	649.385	652.561	766.719	913.702	1082.26	1010.58	914.375	973.51	967.844	723.204	929.295	1094.68	1162.45	-1.11276	1.51144	0.358748	-1.57685	-1.5584	-0.895283	-0.0414854	0.937629	0.521276	-0.0375765	0.30593	0.273019	-1.14805	0.0490947	1.0098	1.40347
ABHD16B	221.002	-0.0627451	0.115216	-0.547723	0.583882	0.999738	218.304	307.59	189.578	106.263	174.629	242.974	325.498	272.237	206.848	202.007	195.141	170.427	298.937	198.702	220.945	205.952	-0.0474799	1.52401	-0.553081	-2.01949	-0.816198	0.38673	1.83922	0.901773	-0.249128	-0.334329	-0.455181	-0.890163	1.37171	-0.392496	-0.000998397	-0.26489
ABHD17A	2353.76	0.0104374	0.113868	0.0897646	0.928474	0.999738	1957.54	3785.82	2153.45	1317.66	1641.51	2170.57	4025.16	3549.78	2229.66	2013.66	1792.81	1779.61	3014.43	1959.15	2010.82	2258.56	-0.495778	1.79189	-0.250647	-1.29644	-0.891215	-0.229223	2.09136	1.49654	-0.155283	-0.425566	-0.701905	-0.718414	0.826675	-0.493762	-0.429108	-0.119122
ABHD17B	449.381	0.106394	0.113828	0.928959	0.35291	0.999738	413.819	587.925	364.471	309.343	358.449	440.053	613.833	727.749	552.877	493.26	409.284	334.575	453.047	464.042	278.971	388.406	-0.293264	1.14248	-0.700206	-1.15481	-0.749863	-0.0769226	1.35613	2.29552	0.853465	0.361839	-0.330663	-0.946742	0.0302258	0.120895	-1.40527	-0.502825
ABHD17C	498.318	-0.0868146	0.0724745	-1.19571	0.231808	0.999738	530.168	539.904	570.737	466.377	391.537	468.4	489.529	461.532	448.353	439.285	467.753	562.408	553.311	447.08	576.913	559.803	0.55518	0.7249	1.26236	-0.55678	-1.86133	-0.521501	-0.153206	-0.641231	-0.87095	-1.02903	-0.532793	1.11717	0.958601	-0.893151	1.37	1.07175
ABHD2	6442.68	-0.0959821	0.108414	-0.894702	0.370946	0.999738	6105.33	3653.44	5743.42	5149.03	5591.81	5956.92	3976.46	6215.96	8984.12	9478.82	9847.65	5489.53	4701.29	9634.62	6991.02	5563.47	-0.169209	-1.39901	-0.350732	-0.648862	-0.426777	-0.243646	-1.23699	-0.113716	1.27472	1.52285	1.70785	-0.478074	-0.873439	1.601	0.275033	-0.44099
ABHD3	111.553	-0.14439	0.0943927	-1.5307	0.125843	0.999738	105.554	85.6579	110.142	115.709	102.939	117.438	90.9857	105.015	111.126	113.829	117.669	121.093	120.689	140.545	128.327	98.1382	-0.437615	-1.8888	-0.102931	0.30307	-0.628314	0.429179	-1.50019	-0.476897	-0.031213	0.165991	0.446061	0.69578	0.666314	2.11464	1.22343	-0.978496
ABHD4	553.776	-0.0140594	0.0834939	-0.167216	0.8672	0.999738	303.467	595.712	646.836	519.508	294.112	400.908	399.825	640.124	765.226	698.473	703.091	617.124	356.496	630.031	626.012	663.47	-1.63833	0.27448	0.609098	-0.224291	-1.69956	-1.00056	-1.00765	0.565171	1.38399	0.947078	0.9773	0.41463	-1.29124	0.499106	0.472799	0.717972
ABHD5	451.723	0.0226337	0.11408	0.223806	0.822908	0.999738	411.42	285.526	626.81	818.225	330.876	338.814	173.001	224.746	439.001	513.568	518.913	673.634	264.587	461.619	656.14	490.691	-0.223689	-0.922415	0.971754	2.03413	-0.670717	-0.62666	-1.54694	-1.25975	-0.07061	0.343245	0.372913	1.23163	-1.03863	0.0549213	1.13454	0.216277
ABHD6	213.59	-0.00342471	0.0848911	-0.0406213	0.967598	0.999738	184.719	263.463	209.604	207.803	154.409	215.977	189.66	241.468	217.85	227.124	233.145	212.585	183.818	253.224	233.22	189.365	-1.01058	1.74575	-0.139511	-0.20255	-2.07155	0.0835686	-0.837617	0.975847	0.149129	0.473753	0.684524	-0.0351717	-1.04212	1.38735	0.687133	-0.847946
ABHD8	621.946	0.0201704	0.11331	0.169677	0.865264	0.999738	412.619	850.09	595.436	399.077	413.595	487.298	640.745	1064.87	833.442	759.93	654.854	470.916	581.163	696.669	533.393	557.038	-1.13381	1.23574	-0.143589	-1.20717	-1.12853	-0.729314	0.101824	2.39908	1.14556	0.747391	0.178245	-0.818049	-0.220901	0.404735	-0.479644	-0.35157
ABI1	1002.4	0.01957	0.115403	0.176401	0.859979	0.999738	1038.74	515.245	1184.86	1251.54	1205.86	1031.29	594.611	640.793	1079.35	1182.11	1052.44	1263.85	750.127	1062.57	1130.39	1054.64	0.151014	-2.02428	0.758182	1.03525	0.845425	0.120041	-1.69449	-1.50259	0.319733	0.746754	0.207935	1.08639	-1.04828	0.250019	0.531832	0.217065
ABI2	1420.25	-0.0222374	0.0918748	-0.24248	0.808408	0.999738	1540.13	1138.21	1443.87	1546.72	1735.26	1530.74	1168.72	1124.4	1327.46	1502.23	1518.73	1402.88	1490.04	1376.37	1538.81	1339.38	0.711833	-1.67469	0.140251	0.750975	1.87053	0.656092	-1.49355	-1.75671	-0.550981	0.486786	0.584815	-0.10311	0.414439	-0.260501	0.703996	-0.480176
ABI3	11.0256	0.0118755	0.0923421	0.179751	0.857348	0.999738	4.7979	35.0419	30.0388	10.6263	1.8382	8.09914	1.28149	3.34443	4.95114	10.1538	2.92345	16.1457	6.49862	4.84639	17.8542	17.969	-0.621289	2.39589	1.89678	-0.0398393	-0.916553	-0.291952	-0.972091	-0.766289	-0.606002	-0.0869785	-0.808286	0.510783	-0.451622	-0.616452	0.681222	0.692676
ABI3BP	449.217	0.0467302	0.105996	0.660839	0.508716	0.999738	67.1706	360.801	819.058	1044.92	106.616	32.3966	19.2223	290.297	498.415	446.766	642.429	818.945	23.2094	497.967	844.725	674.528	-1.13014	-0.261543	1.09404	1.76216	-1.01345	-1.233	-1.27197	-0.470104	0.145534	-0.00724791	0.571545	1.0937	-1.26018	0.144208	1.16996	0.666497
ABL1	12124.3	0.00817865	0.0817338	0.104597	0.916696	0.999738	9827.29	16059.6	14134.9	10685.3	9281.08	9659.58	11618	12985.1	11987.8	11931.8	12286.5	13690.6	9503.77	11777.9	15094.6	13465.7	-1.12825	1.93286	0.98754	-0.706802	-1.39653	-1.21063	-0.248713	0.422774	-0.0670651	-0.0945928	0.0796669	0.769323	-1.28715	-0.170146	1.45889	0.65882
ABL2	3502.06	0.133184	0.109665	1.22247	0.221529	0.999738	3851.51	2451.63	3176.77	4953.04	4992.55	4146.76	3506.15	2682.9	2833.7	2959.03	3758.1	4009.51	4121.98	2299.61	3611	2678.76	0.421105	-1.26583	-0.391996	1.7485	1.79612	0.776896	0.00492916	-0.987134	-0.805414	-0.654392	0.308538	0.611505	0.747037	-1.44902	0.131279	-0.992129
ABLIM1	413.908	-0.0754361	0.114042	-0.766468	0.443398	0.999738	874.417	10.3828	18.6908	10.6263	1020.2	889.556	597.174	375.245	465.407	521.584	447.288	9.86681	736.201	616.703	16.7383	12.4401	1.27228	-1.11485	-1.09189	-1.11417	1.67505	1.31411	0.506323	-0.106815	0.142281	0.297484	0.0922235	-1.11627	0.890423	0.560278	-1.09729	-1.10916
ABLIM2	4.82104	0.0219554	0.0783977	0.324664	0.745435	0.999738	1.19947	9.08493	6.67529	2.3614	1.8382	0	6.40745	7.35775	4.40101	5.3441	6.57777	6.27888	0	12.116	3.34766	4.14669	-1.08662	1.27934	0.556352	-0.737991	-0.894972	-1.44651	0.475988	0.761118	-0.126024	0.156939	0.527092	0.437413	-1.44651	2.18878	-0.442074	-0.202332
ABLIM3	3823.31	-0.165663	0.0845375	-1.9672	0.0491599	0.999738	4358.89	2777.39	3469.15	2875	4393.3	4331.69	3707.35	3322.36	3999.42	3781.48	4114.76	3582.55	4022.65	4257.55	4363.11	3816.33	1.04386	-2.03854	-0.690279	-1.84829	1.11093	0.990853	-0.226018	-0.976377	0.343241	-0.0815286	0.568047	-0.469256	0.388513	0.846356	1.05209	-0.0136019
ABR	4518.63	-0.0635695	0.0889112	-0.71033	0.477499	0.999738	3869.5	6151.79	4987.78	4017.92	3284.87	3728.31	4668.47	4524.35	4368.55	4078.08	4127.92	5002.47	4063.5	4045.52	5823.8	5555.18	-0.813909	2.04777	0.588253	-0.627814	-1.54697	-0.990954	0.187879	0.00717602	-0.188168	-0.552385	-0.489896	0.606679	-0.570671	-0.593205	1.63652	1.29969
ABRA	2.55713	-0.0264395	0.057548	-0.621333	0.534381	0.999738	1.19947	0	2.00259	2.3614	1.8382	4.04957	2.56298	6.68887	2.20051	3.20646	3.65432	0	5.57025	0	5.57943	0	-0.637056	-1.19989	-0.260209	-0.0918416	-0.337344	0.700305	0.00274569	1.93875	-0.167339	0.304688	0.514839	-1.19989	1.41386	-1.19989	1.41816	-1.19989
ABRACL	263.793	-0.067806	0.0705424	-0.96452	0.334785	0.999738	275.879	233.612	230.298	246.766	257.348	248.374	233.231	276.919	318.523	288.047	314.271	222.452	259.017	321.073	248.842	246.037	0.375521	-0.937732	-1.04073	-0.529032	-0.200249	-0.479089	-0.949581	0.407831	1.7005	0.753576	1.56839	-1.2845	-0.148411	1.77973	-0.464528	-0.551702
ABT1	534.753	-0.0796206	0.0744744	-1.06912	0.285014	0.999738	640.519	465.927	538.696	477.003	624.988	599.337	504.907	463.538	511.068	486.847	438.518	559.717	631.295	451.926	564.638	597.123	1.53458	-0.998603	0.0572105	-0.837902	1.30924	0.937052	-0.433041	-1.03326	-0.343654	-0.695071	-1.39628	0.362211	1.40074	-1.20175	0.433604	0.904932
ABTB1	649.709	0.0127671	0.114976	0.127701	0.898385	0.999738	322.659	1253.72	803.705	650.566	310.656	340.164	622.804	896.308	668.404	561.13	608.809	642.24	404.771	617.915	754.338	937.151	-1.31183	2.42275	0.617695	0.00343766	-1.35998	-1.24162	-0.107919	0.989135	0.0749877	-0.355298	-0.164052	-0.0299589	-0.982469	-0.127529	0.41968	1.15296
ABTB2	748.309	-0.0393451	0.111909	-0.357646	0.720608	0.999738	662.11	914.982	620.802	442.763	775.721	801.815	1154.62	937.11	724.517	661.065	617.58	629.682	863.388	674.86	727.557	764.372	-0.522759	1.0108	-0.773273	-1.853	0.16624	0.32449	2.4641	1.14499	-0.14429	-0.529098	-0.792815	-0.71942	0.697905	-0.445436	-0.125852	0.0974173
ACAA1	762.741	0.031861	0.105785	0.300284	0.76396	0.999738	615.33	950.024	795.695	563.194	676.458	685.727	959.835	1038.11	765.776	806.424	755.713	634.167	745.485	703.938	729.789	778.195	-1.14335	1.4526	0.255593	-1.54773	-0.669234	-0.597337	1.52871	2.13584	0.0235381	0.338812	-0.054515	-0.997253	-0.133846	-0.45609	-0.255587	0.11986
ACAA2	941.307	-0.0174175	0.0802198	-0.207614	0.83553	0.999738	699.294	1432.82	1136.13	1226.75	694.84	730.273	850.909	802.664	678.856	751.914	762.291	1195.68	639.65	825.098	1196.23	1437.52	-0.86674	1.7603	0.697748	1.02227	-0.882691	-0.755793	-0.32375	-0.496533	-0.939935	-0.678287	-0.641125	0.910996	-1.08035	-0.416189	0.912968	1.77711
ACACA	3584.07	-0.127463	0.0797928	-1.59536	0.110633	0.999738	3381.32	3230.34	3800.24	3886.86	4172.72	3525.83	3039.69	2850.79	3179.73	3391.9	3251.61	3964.66	3499.04	3809.26	4517.1	3843.98	-0.457931	-0.798931	0.488254	0.683898	1.32952	-0.131544	-1.22953	-1.65618	-0.913237	-0.434038	-0.750888	0.859616	-0.192036	0.508626	2.10736	0.587034
ACACB	343.269	0.0528424	0.0918831	0.569183	0.569232	0.999738	220.703	215.443	278.36	237.321	275.73	295.619	260.142	490.294	575.982	606.02	507.95	249.361	194.03	583.99	262.233	239.126	-0.815388	-0.850386	-0.43182	-0.704838	-0.449313	-0.317001	-0.553014	0.978106	1.54816	1.748	1.09557	-0.624737	-0.992835	1.60144	-0.539105	-0.692831
ACAD10	457.993	-0.0980012	0.0846315	-1.16271	0.244948	0.999738	465.396	424.396	414.536	308.163	431.977	402.257	426.736	556.514	575.982	480.969	568.612	369.557	381.562	644.57	432.963	443.695	0.0841943	-0.382082	-0.494219	-1.70395	-0.295863	-0.633853	-0.35547	1.12043	1.34184	0.261293	1.25802	-1.00574	-0.869213	2.12186	-0.284648	-0.162598
ACAD11	717.31	-0.0123596	0.113036	-0.129372	0.897063	0.999738	726.882	262.165	459.26	589.169	1001.82	737.022	577.952	814.035	1111.81	1066.68	990.32	424.273	565.38	1220.08	475.367	454.753	0.0332655	-1.58187	-0.896861	-0.445357	0.988821	0.068509	-0.484345	0.33617	1.37108	1.21425	0.948854	-1.01846	-0.528037	1.74739	-0.840881	-0.912525
ACAD8	552.888	0.0667165	0.0814987	0.815748	0.414644	0.999738	525.37	611.286	524.01	438.04	544.107	516.995	647.152	628.084	645.298	640.757	577.382	461.049	505.036	642.147	441.89	497.602	-0.365501	0.775651	-0.383558	-1.52544	-0.116624	-0.476733	1.25203	0.998774	1.22741	1.16709	0.325336	-1.21982	-0.635581	1.18555	-1.47429	-0.734314
ACAD9	1064.36	-0.0340454	0.0794402	-0.429197	0.66778	0.999738	1001.56	1151.19	1054.7	907.958	1073.51	1035.34	1240.48	1258.18	1016.08	1007.9	987.397	972.329	1212.46	983.817	1050.05	1076.76	-0.619263	0.856329	-0.0952648	-1.54234	0.0902666	-0.286143	1.73689	1.91139	-0.476047	-0.556787	-0.75895	-0.907537	1.46053	-0.794248	-0.141103	0.122285
ACADL	0.536227	0.0116992	0.0282434	0.406367	0.684473	0.999738	0	1.29785	0	0	1.8382	0	0	1.33777	1.10025	0	0	1.79397	0	1.2116	0	0	-0.727506	1.0333	-0.727506	-0.727506	1.7664	-0.727506	-0.727506	1.08747	0.76522	-0.727506	-0.727506	1.70639	-0.727506	0.916282	-0.727506	-0.727506
ACADM	396.747	0.0816693	0.104965	0.77863	0.436197	0.999738	458.199	297.207	415.871	517.147	409.919	476.5	344.721	317.721	380.137	429.131	347.891	455.667	324.003	436.175	378.285	359.379	0.973278	-1.57651	0.302879	1.90688	0.208614	1.26312	-0.823993	-1.25161	-0.263062	0.512894	-0.77378	0.933177	-1.15212	0.624461	-0.292401	-0.591826
ACADS	184.487	-0.0400984	0.112559	-0.363908	0.715927	0.999738	131.942	280.335	168.885	67.2999	126.836	179.531	269.113	288.29	194.195	171.011	175.407	137.238	246.948	165.989	171.846	176.925	-0.873645	1.59363	-0.259411	-1.94843	-0.958546	-0.0824007	1.40705	1.7259	0.161407	-0.224059	-0.150965	-0.785587	1.03851	-0.307561	-0.210172	-0.125725
ACADSB	255.017	-0.0215806	0.114977	-0.19406	0.846129	0.999738	347.848	106.423	233.635	356.571	340.067	322.616	210.164	132.44	240.405	290.184	251.417	223.349	278.512	242.32	284.551	219.774	1.30758	-2.09305	-0.301183	1.43046	1.19799	0.952175	-0.631788	-1.7266	-0.205821	0.495354	-0.0507124	-0.446075	0.330946	-0.178858	0.415999	-0.496423
ACADVL	7972.08	-0.0552094	0.093357	-0.590011	0.555183	0.999738	6992.94	9972.65	7705.96	7039.33	6871.2	6876.17	9644.49	8849.37	8096.21	7577.39	6978.28	7587.58	7099.28	8692	8161.58	9408.83	-0.93165	1.90354	-0.253215	-0.887503	-1.04749	-1.04275	1.59129	0.834737	0.118112	-0.375542	-0.945591	-0.365851	-0.830464	0.685003	0.180312	1.36706
ACAN	2.41903	0.0155092	0.0491696	0.164393	0.869422	0.999738	3.59842	0	0.667529	0	1.8382	2.69971	7.68894	7.35775	4.95114	0	2.19259	0	6.49862	1.2116	0	0	0.422811	-0.867221	-0.627912	-0.867221	-0.208227	0.100625	1.88926	1.77053	0.907758	-0.867221	-0.081179	-0.867221	1.46253	-0.432864	-0.867221	-0.867221
ACAP1	19.8073	0.0260424	0.09622	0.279416	0.779926	0.999738	10.7953	49.3182	14.0181	11.807	22.0584	13.4986	37.1632	28.0932	15.9537	8.01614	15.3481	16.1457	15.7824	20.5972	18.97	19.3512	-0.854283	2.79745	-0.548777	-0.758377	0.213394	-0.598026	1.64523	0.785458	-0.365298	-1.11773	-0.422699	-0.347096	-0.381536	0.0748763	-0.0793641	-0.0432329
ACAP2	1331.65	-0.0348164	0.102802	-0.3406	0.733404	0.999738	1457.36	913.684	1231.59	1544.36	1439.31	1386.3	949.584	1147.14	1403.37	1601.63	1577.93	1258.47	1308.08	1575.08	1275.46	1237.09	0.60098	-1.99819	-0.478364	1.01687	0.514687	0.261271	-1.82656	-0.8821	0.342875	1.29066	1.1774	-0.349879	-0.112694	1.16374	-0.268656	-0.452054
ACAP3	2716.05	-0.071311	0.11454	-0.627627	0.530248	0.999738	2197.44	3367.91	2142.1	1603.39	2446.65	2321.75	4020.03	4121.68	3008.64	2753.81	2302.22	1911.47	3274.38	3211.95	2256.32	2517.04	-0.715535	0.899386	-0.791884	-1.53515	-0.371699	-0.544013	1.79912	1.93937	0.403695	0.0521033	-0.570965	-1.11009	0.770334	0.684196	-0.634295	-0.274577
ACAT1	389.255	0.022496	0.107409	0.201753	0.840109	0.999738	478.59	221.932	325.087	412.064	505.505	475.15	301.15	369.225	445.052	448.904	451.674	313.047	404.771	502.813	280.087	293.032	0.997305	-1.86794	-0.716356	0.254632	1.29777	0.958896	-0.983577	-0.223607	0.622899	0.665898	0.696817	-0.850762	0.173216	1.26772	-1.21871	-1.0742
ACAT2	874.932	0.122716	0.10064	1.21554	0.224159	0.999738	846.829	1104.47	785.014	783.985	1011.01	897.655	1360.94	905.672	810.336	756.724	741.826	820.739	995.218	809.347	691.849	677.292	-0.16115	1.31624	-0.515617	-0.52152	0.780322	0.130303	2.78695	0.176278	-0.370411	-0.677843	-0.763271	-0.310757	0.68976	-0.376084	-1.04986	-1.13333
ACBD3	1980.8	0.117824	0.0726935	1.62253	0.104689	0.999738	1957.54	2103.81	2070.68	2660.12	1887.83	1938.39	1737.7	1781.91	1945.25	1978.92	1833.74	2254.12	1558.74	2002.77	1909.28	2071.96	-0.0957955	0.506732	0.37024	2.79837	-0.382957	-0.174671	-1.00141	-0.819274	-0.146443	-0.00773927	-0.605797	1.12591	-1.7386	0.090517	-0.294609	0.375535
ACBD4	170.18	0.0761557	0.11435	0.661189	0.508491	0.999738	133.142	277.739	163.545	138.142	99.2628	128.236	179.408	259.528	208.498	189.715	195.141	126.475	157.824	173.258	145.065	147.898	-0.771846	2.24145	-0.138272	-0.667645	-1.47785	-0.874068	0.192318	1.86195	0.79852	0.407106	0.520162	-0.910783	-0.257492	0.0641562	-0.523372	-0.464326
ACBD5	700.731	-0.0725067	0.0677834	-1.07	0.284621	0.999738	743.674	587.925	664.191	741.48	726.089	724.873	689.441	598.653	715.715	739.088	694.32	687.986	777.05	759.672	706.355	655.176	0.805417	-2.1157	-0.6853	0.764258	0.47561	0.452802	-0.211735	-1.91448	0.281029	0.71941	-0.120226	-0.23903	1.43138	1.10545	0.105492	-0.854379
ACBD6	780.547	0.11446	0.111671	1.0268	0.304515	0.999738	706.49	1236.85	736.285	668.276	647.047	695.176	963.68	1026.07	781.18	773.291	706.014	709.513	816.041	657.897	564.638	800.31	-0.441968	2.72318	-0.264159	-0.670029	-0.796726	-0.50949	1.09293	1.46528	0.00377301	-0.0433084	-0.444811	-0.423928	0.211826	-0.731969	-1.28854	0.117944
ACBD7	40.7623	0.0397624	0.112242	0.34783	0.727967	0.999738	50.3779	36.3397	18.0233	22.4333	64.337	37.796	73.0449	55.5176	39.059	50.2345	43.1209	10.7638	85.4105	42.4059	12.2747	11.0578	0.430666	-0.19808	-1.01844	-0.820923	1.05587	-0.132855	1.44588	0.660862	-0.0762887	0.424242	0.105639	-1.34358	1.99971	0.0736143	-1.27591	-1.33041
ACCS	81.7059	-0.0124954	0.114806	-0.114032	0.909212	0.999738	29.9869	142.763	94.7891	70.842	44.1168	35.0963	61.5115	125.751	102.874	81.7647	100.859	84.3164	56.6309	96.9278	83.6914	95.3738	-1.66356	1.96393	0.420828	-0.349441	-1.20907	-1.49922	-0.649561	1.41672	0.680871	0.00189071	0.616073	0.0839681	-0.806549	0.48962	0.0638644	0.439634
ACD	662.89	-0.00170505	0.111295	-0.0219682	0.982473	0.999738	674.105	773.517	567.4	415.606	608.445	739.722	1126.43	822.062	648.049	586.247	553.264	508.589	799.331	614.28	591.419	577.772	0.0680881	0.671634	-0.579735	-1.5013	-0.330545	0.46646	2.81422	0.966358	-0.0900999	-0.465308	-0.665557	-0.936783	0.828355	-0.295117	-0.43391	-0.516766
ACE	175.316	-0.0199522	0.0943075	-0.209143	0.834337	0.999738	152.333	177.805	237.64	173.563	143.38	174.132	149.934	152.506	194.745	169.942	184.908	167.736	152.253	176.893	217.598	179.69	-0.913021	0.0988725	2.4759	-0.0696494	-1.26871	-0.0470586	-1.00832	-0.906153	0.771824	-0.213485	0.381065	-0.301138	-0.916192	0.062652	1.67968	0.173745
ACE2	0.933984	-0.0146064	0.0426404	-0.240159	0.810207	0.999738	0	0	2.00259	2.3614	0	1.34986	0	0.668887	0.550127	0	2.19259	0.896983	0	2.4232	1.11589	1.38223	-1.00944	-1.00944	1.15494	1.54274	-1.00944	0.449474	-1.00944	-0.286516	-0.414871	-1.00944	1.3603	-0.0399904	-1.00944	1.60953	0.196598	0.484461
ACER2	55.6615	0.00789313	0.115019	0.110661	0.911885	0.999738	29.9869	48.0203	96.1242	86.1911	33.0876	31.0467	23.0668	37.4576	50.0615	44.8904	54.8148	95.0802	21.3526	33.9247	100.43	105.049	-0.852953	-0.253853	1.34423	1.01424	-0.749941	-0.817743	-1.08285	-0.604762	-0.186041	-0.357834	-0.0281311	1.30955	-1.1398	-0.722131	1.48727	1.64074
ACER3	359.214	0.0494783	0.102741	0.500247	0.616901	0.999738	358.643	398.439	518.003	517.147	363.964	302.368	233.231	208.693	250.308	263.464	296.731	525.632	275.727	228.992	591.419	414.669	-0.00464401	0.318835	1.2907	1.28374	0.0386065	-0.46207	-1.02404	-1.2235	-0.885239	-0.778298	-0.507893	1.35271	-0.678617	-1.0585	1.88746	0.450756
ACHE	6.10592	-0.0265863	0.0893005	-0.328661	0.742412	0.999738	9.5958	1.29785	4.00517	2.3614	11.0292	4.04957	8.97042	10.7022	7.70177	6.41291	2.92345	4.48491	11.1405	6.05799	5.57943	1.38223	1.02212	-1.4082	-0.615272	-1.0967	1.44194	-0.602269	0.838961	1.34616	0.467395	0.0899118	-0.932089	-0.474765	1.47454	-0.0140398	-0.154202	-1.38349
ACKR2	2.15096	0.0138644	0.0637244	0.219636	0.826155	0.999738	2.39895	1.29785	2.00259	2.3614	3.6764	2.69971	5.12596	1.33777	1.10025	1.60323	3.65432	0	3.7135	1.2116	2.23177	0	0.177612	-0.610993	-0.106261	0.150719	1.09252	0.393019	2.13068	-0.582398	-0.752509	-0.39228	1.0767	-1.54051	1.11909	-0.672765	0.0578788	-1.54051
ACKR3	3.02132	0.0383189	0.0653827	0.630408	0.528428	0.999738	4.7979	2.59569	4.6727	3.5421	3.6764	1.34986	3.84447	2.00666	5.50127	0	2.92345	3.58793	0	4.84639	2.23177	2.76446	1.08761	-0.260563	1.01097	0.318821	0.401039	-1.02326	0.503928	-0.621165	1.51821	-1.84963	-0.0599103	0.346878	-1.84963	1.1173	-0.483354	-0.157247
ACKR4	199.564	0.0846593	0.113836	0.690823	0.489677	0.999738	183.52	6.48923	12.6831	23.614	226.099	230.826	130.712	263.541	451.104	479.365	480.908	18.8366	134.614	530.68	14.5065	5.52891	-0.0835577	-1.0055	-0.973248	-0.916322	0.138188	0.162805	-0.358572	0.333183	1.30998	1.45716	1.4652	-0.941201	-0.338249	1.7244	-0.963752	-1.01051
ACLY	15558.8	-0.0752552	0.0964131	-0.780387	0.435163	0.999738	16419.6	12765.6	16602.1	13718.6	16516.2	15669.1	12818.7	12549.6	16207.3	16347.6	15028.7	18286.8	12560	18050.4	18475.7	16924	0.414021	-1.34335	0.501799	-0.885039	0.460495	0.0530884	-1.3178	-1.44722	0.311903	0.379384	-0.254908	1.31204	-1.44225	1.19834	1.4029	0.656611
ACO1	5348.7	-0.0234107	0.0648642	-0.359285	0.719382	0.999738	5286.08	5088.86	5872.25	5876.34	4783	5248.24	4888.88	4425.35	5170.64	5588.86	5377.69	5909.32	4724.5	5387.97	6188.7	5762.51	-0.126237	-0.523853	1.0555	1.06375	-1.14047	-0.202523	-0.927011	-1.8615	-0.358978	0.484159	0.0584503	1.13023	-1.25841	0.0791774	1.69346	0.834256
ACO2	2703.18	-0.110437	0.0750279	-1.47242	0.140907	0.999738	2715.61	3068.11	2542.62	2034.35	2354.74	2641.67	2583.48	2922.37	2839.2	2751.67	2746.58	2575.24	2670.01	3158.63	2796.41	2850.16	0.0465073	1.36512	-0.600611	-2.50192	-1.30343	-0.230082	-0.447749	0.819924	0.508835	0.181415	0.162375	-0.47859	-0.124089	1.70375	0.34875	0.549806
ACOT1	206.45	0.0876178	0.110285	0.835504	0.403434	0.999738	106.753	719.007	273.687	204.261	154.409	152.534	280.646	135.115	79.2182	98.3314	94.2814	226.04	119.76	115.102	245.495	298.561	-0.643451	3.30808	0.433951	-0.0141277	-0.335878	-0.347979	0.478867	-0.460401	-0.821163	-0.697806	-0.723945	0.126433	-0.559502	-0.589568	0.251997	0.594493
ACOT11	147.963	-0.0730598	0.101591	-0.724619	0.468686	0.999738	124.745	147.955	110.142	92.0946	161.762	134.986	142.245	203.342	176.591	162.995	157.867	145.311	127.187	209.606	146.181	124.401	-0.747031	-0.000275475	-1.21688	-1.79757	0.443969	-0.417547	-0.18397	1.7818	0.92109	0.483649	0.318642	-0.085324	-0.66846	1.98337	-0.0573407	-0.758124
ACOT12	6.52643	-0.0595411	0.0778778	-0.846345	0.397361	0.999738	10.7953	0	0	0	18.382	13.4986	12.8149	2.67555	4.95114	10.6882	2.92345	0	20.4242	7.26959	0	0	0.606211	-0.926807	-0.926807	-0.926807	1.68359	0.990102	0.893014	-0.546858	-0.223705	0.591004	-0.511653	-0.926807	1.9736	0.105534	-0.926807	-0.926807
ACOT13	234.534	0.0493097	0.095397	0.514964	0.606578	0.999738	205.11	250.484	235.638	240.863	238.966	276.721	285.772	244.144	210.698	209.489	247.763	208.1	298.008	226.569	204.207	170.014	-0.876017	0.474877	0.0328589	0.18842	0.131951	1.25599	1.52547	0.286096	-0.709641	-0.745662	0.393846	-0.787002	1.88977	-0.237146	-0.902907	-1.9209
ACOT2	995.261	0.0618837	0.110699	0.566441	0.571094	0.999738	662.11	1977.92	863.115	647.024	744.471	838.261	1779.99	1579.24	901.657	798.942	767.407	717.586	1040.71	794.808	786.699	1024.23	-0.812382	2.39619	-0.322234	-0.84917	-0.611545	-0.38284	1.91355	1.42403	-0.22825	-0.478719	-0.555618	-0.677104	0.110823	-0.4888	-0.508574	0.0706451
ACOT4	2.9171	0.08347	0.0624656	1.43674	0.150792	0.999738	0	15.5742	2.67012	3.5421	0	2.69971	0	3.34443	2.20051	4.80969	3.65432	2.69095	0.928375	1.2116	3.34766	0	-0.785903	3.40997	-0.0665406	0.168383	-0.785903	-0.0585666	-0.785903	0.115129	-0.19306	0.509886	0.198615	-0.0609282	-0.535788	-0.459484	0.115997	-0.785903
ACOT7	2117.83	0.0059982	0.109128	0.0600343	0.952128	0.999738	1967.14	3208.28	2234.22	1642.35	1652.54	1815.56	2646.28	2486.92	1923.24	1805.77	1850.55	2040.64	2129.69	1726.53	2249.62	2505.98	-0.354617	2.56608	0.27389	-1.11891	-1.09494	-0.711322	1.24356	0.868555	-0.457915	-0.734356	-0.628986	-0.181659	0.0279095	-0.920834	0.31014	0.913408
ACOT8	332.256	-0.0278479	0.114201	-0.246183	0.805541	0.999738	245.892	498.373	308.398	217.249	277.568	249.724	378.039	517.718	348.23	329.196	328.158	265.507	322.146	356.21	304.637	369.055	-1.04387	2.00784	-0.288368	-1.39009	-0.661009	-0.997566	0.553376	2.24166	0.193074	-0.0369859	-0.0495392	-0.806794	-0.122202	0.289523	-0.333837	0.444784
ACOT9	969.907	0.0509859	0.0597327	0.854883	0.392616	0.999738	1134.7	942.237	1019.98	1092.15	1082.7	981.346	1105.93	791.293	802.635	831.541	855.11	1071	924.661	854.176	1002.06	1027	1.43116	-0.240304	0.434891	1.06159	0.979543	0.0993395	1.18124	-1.55117	-1.45267	-1.20163	-0.996948	0.877911	-0.392938	-1.00506	0.279269	0.495782
ACOX1	1591.33	-0.0971282	0.0669773	-1.4495	0.147199	0.999738	1516.14	1854.62	1568.69	1482.96	1411.74	1389	1626.21	1594.63	1454.53	1601.63	1545.05	1593.04	1408.34	1718.05	1897	1799.66	-0.479429	1.6787	-0.144331	-0.690956	-1.14505	-1.29	0.222383	0.0210073	-0.872187	0.0656373	-0.295107	0.010908	-1.16669	0.807909	1.94892	1.32828
ACOX2	111.205	-0.0485614	0.0924744	-0.52861	0.597076	0.999738	67.1706	127.189	135.508	114.528	56.9842	70.1926	55.104	139.797	147.984	121.311	138.864	129.166	67.7713	132.064	124.979	150.663	-1.27138	0.461506	0.70171	0.095948	-1.56549	-1.18413	-1.61977	0.825541	1.06191	0.291793	0.798596	0.518574	-1.25404	0.602265	0.397702	1.13926
ACOX3	538.208	0.00139793	0.0926073	0.0200168	0.98403	0.999738	434.21	772.219	594.101	506.52	417.272	457.602	562.574	596.647	528.121	463.333	460.444	597.391	469.758	485.851	640.518	624.767	-1.09429	2.46231	0.588117	-0.333423	-1.27252	-0.848155	0.256383	0.614906	-0.106131	-0.787847	-0.818247	0.622732	-0.720248	-0.550913	1.07653	0.910796
ACOXL	1.42035	-0.0487088	0.0487529	-1.07965	0.2803	0.999738	0	0	0	0	0	2.69971	1.28149	3.34443	1.10025	1.60323	2.19259	1.79397	0.928375	3.63479	0	4.14669	-0.989392	-0.989392	-0.989392	-0.989392	-0.989392	0.89119	-0.0967253	1.34029	-0.222972	0.127394	0.537935	0.260259	-0.3427	1.54255	-0.989392	1.89913
ACP1	789.299	0.0109501	0.107873	0.101936	0.918807	0.999738	921.196	485.395	855.105	1007.14	794.103	793.716	625.367	628.084	858.747	824.594	834.646	862.001	715.777	863.869	782.235	776.813	1.04486	-2.40746	0.521297	1.72566	0.0380541	0.03499	-1.29863	-1.2771	0.550153	0.279597	0.359228	0.575923	-0.582425	0.590726	-0.0559565	-0.0989154
ACP2	1278.17	-0.0296714	0.105909	-0.2772	0.781627	0.999738	915.199	1853.33	1403.15	896.151	790.426	1065.04	1070.04	1716.36	1424.28	1410.84	1295.82	1312.29	1025.85	1399.4	1313.4	1559.15	-1.21362	1.92308	0.417869	-1.27731	-1.63081	-0.712627	-0.695888	1.46514	0.488524	0.443598	0.059018	0.11407	-0.84364	0.405327	0.117784	0.939494
ACP5	8.49261	-0.0732811	0.0856057	-0.843083	0.399182	0.999738	0	15.5742	12.0155	11.807	11.0292	4.04957	5.12596	9.36441	5.50127	4.27528	10.2321	5.3819	12.0689	10.9044	3.34766	15.2045	-1.85766	1.54901	0.770598	0.724986	0.554852	-0.971866	-0.736418	0.190697	-0.654324	-0.922495	0.380491	-0.680434	0.782267	0.527547	-1.1254	1.46815
ACP6	178.526	-0.0169263	0.0936469	-0.190214	0.849141	0.999738	217.105	136.274	134.173	110.986	154.409	237.575	226.824	220.064	226.652	177.424	203.911	129.166	210.741	191.432	142.833	136.841	0.900315	-0.986014	-1.03503	-1.57616	-0.562804	1.37802	1.12712	0.969363	1.12312	-0.0257073	0.592411	-1.1519	0.751803	0.301204	-0.83294	-0.972789
ACPP	114.693	-0.0360679	0.115254	-0.309682	0.756803	0.999738	299.869	40.2332	50.7322	28.3368	314.332	311.817	261.424	12.7088	13.7532	17.1011	32.158	43.0552	305.435	21.8088	54.6784	27.6446	1.43473	-0.576908	-0.495563	-0.669081	1.54679	1.5273	1.13686	-0.790166	-0.782074	-0.756135	-0.639475	-0.555044	1.47786	-0.71966	-0.464989	-0.674445
ACPT	4.23606	-0.103591	0.0666915	-1.33714	0.181178	0.999738	3.59842	3.89354	2.00259	0	1.8382	5.39943	6.40745	8.69553	2.75063	0.53441	2.92345	1.79397	20.4242	3.63479	1.11589	2.76446	-0.131427	-0.0705991	-0.460354	-0.873119	-0.494237	0.239788	0.447556	0.919165	-0.30617	-0.762969	-0.270549	-0.503354	3.33664	-0.123931	-0.643117	-0.303321
ACRBP	4.68604	0.0441858	0.0882683	0.476194	0.633936	0.999738	3.59842	3.89354	4.6727	1.1807	7.3528	4.04957	3.84447	5.35109	7.15164	6.41291	7.30863	4.48491	4.64187	2.4232	4.46354	4.14669	-0.633535	-0.461631	-0.00777076	-2.04185	1.55338	-0.370743	-0.490215	0.387388	1.4362	1.0059	1.52765	-0.117157	-0.0257294	-1.3181	-0.129608	-0.314174
ACRC	16.6896	0.00826142	0.113967	0.0678764	0.945884	0.999738	17.9921	12.9785	14.6856	18.8912	7.3528	20.2479	11.5334	20.7355	15.9537	19.7732	18.2716	21.5276	12.9972	19.3856	16.7383	17.969	0.335852	-0.956875	-0.516695	0.567674	-2.40741	0.917476	-1.32947	1.04321	-0.189744	0.795078	0.407911	1.24744	-0.952033	0.69514	0.0125598	0.329885
ACRV1	3.01135	-0.0660569	0.0712108	-0.769018	0.441883	0.999738	1.19947	2.59569	2.67012	4.7228	5.5146	4.04957	1.28149	2.00666	0.550127	2.13764	2.19259	2.69095	7.427	0	2.23177	6.91114	-0.839796	-0.192655	-0.158161	0.793248	1.16024	0.48121	-0.801782	-0.465669	-1.14076	-0.404962	-0.379491	-0.148505	2.04663	-1.39575	-0.361332	1.80753
ACSBG1	6.21273	0.064665	0.0848513	0.82696	0.40826	0.999738	10.7953	16.872	12.6831	3.5421	1.8382	4.04957	2.56298	4.68221	4.40101	2.13764	5.11604	8.96983	3.7135	3.63479	3.34766	11.0578	1.03095	2.39806	1.45565	-0.600822	-0.984155	-0.486655	-0.821099	-0.344328	-0.40759	-0.91679	-0.246726	0.620275	-0.562262	-0.579969	-0.644568	1.09002
ACSBG2	2.41491	0.0138217	0.0636689	0.231097	0.817239	0.999738	2.39895	3.89354	0.667529	3.5421	3.6764	1.34986	1.28149	5.35109	1.10025	2.13764	2.92345	1.79397	4.64187	0	1.11589	2.76446	-0.0105685	0.979362	-1.15736	0.746588	0.835542	-0.705426	-0.750709	1.94476	-0.870749	-0.183646	0.336833	-0.411274	1.47501	-1.59949	-0.860395	0.231523
ACSF2	181.232	-0.0258425	0.0911262	-0.286114	0.774791	0.999738	190.716	160.933	192.916	139.323	204.04	193.03	194.786	170.566	185.393	193.991	187.832	155.178	158.752	191.432	170.73	210.099	0.482013	-1.03167	0.593796	-2.12998	1.15917	0.599573	0.688858	-0.542092	0.21144	0.648418	0.335411	-1.32416	-1.14252	0.518401	-0.53374	1.46708
ACSF3	593.425	-0.0248429	0.104344	-0.238776	0.811279	0.999738	488.186	777.41	553.382	472.28	571.68	531.844	636.9	777.915	656.301	537.082	534.261	548.953	698.138	523.41	580.26	606.798	-1.12948	1.97463	-0.429769	-1.3002	-0.233375	-0.660925	0.466599	1.98005	0.674819	-0.60471	-0.63498	-0.477294	1.12383	-0.751439	-0.141293	0.14353
ACSL1	791.859	-0.0982457	0.106624	-0.918711	0.358247	0.999738	832.435	558.074	866.453	866.634	737.119	772.118	552.322	589.958	847.745	853.452	839.762	883.528	620.154	942.623	1025.5	881.862	0.286206	-1.64899	0.526146	0.527424	-0.386106	-0.139237	-1.68956	-1.4241	0.394192	0.434446	0.337885	0.646586	-1.21111	1.06341	1.64797	0.634834
ACSL3	2516.39	0.0290907	0.0857007	0.335607	0.737167	0.999738	2921.92	1950.66	2156.12	2579.83	3020.16	2966.99	2320.78	2211.34	2708.27	2881	2669.84	2223.62	2592.02	3007.19	1998.55	2053.99	1.05553	-1.47251	-0.937743	0.165117	1.31125	1.17283	-0.509161	-0.794013	0.499437	0.949026	0.399412	-0.762046	0.196852	1.27746	-1.34787	-1.20357
ACSL4	5213.69	-0.000348484	0.109262	0.00168917	0.998652	0.999738	5388.04	3641.76	5872.92	7254.22	5036.67	5090.31	3758.61	3598.61	4751.99	5826.67	5520.94	6377.55	4442.27	5412.21	5599.51	5846.83	0.173801	-1.56703	0.657168	2.03416	-0.176471	-0.122998	-1.45054	-1.61004	-0.46026	0.611059	0.306289	1.16022	-0.769013	0.197892	0.384612	0.631156
ACSL5	13.0811	-0.113694	0.0980455	-1.02651	0.304652	0.999738	11.9947	3.89354	25.3661	22.4333	5.5146	6.74929	10.2519	4.01332	9.35215	7.48173	6.57777	16.1457	6.49862	6.05799	37.9401	29.0268	-0.106072	-0.897076	1.19951	0.913151	-0.738795	-0.61824	-0.276243	-0.885381	-0.364096	-0.546724	-0.634987	0.299227	-0.642715	-0.685739	2.42724	1.55694
ACSL6	0.322387	0.00546263	0.0155405	0.372531	0.709498	0.999738	0	0	1.33506	2.3614	0	0	0	0	0	0	1.46173	0	0	0	0	0	-0.446147	-0.446147	1.40142	2.82177	-0.446147	-0.446147	-0.446147	-0.446147	-0.446147	-0.446147	1.57672	-0.446147	-0.446147	-0.446147	-0.446147	-0.446147
ACSM3	5.61416	0.0735477	0.0639603	1.33951	0.180406	0.999738	4.7979	5.19139	1.33506	11.807	5.5146	5.39943	3.84447	8.69553	7.15164	7.48173	17.5407	0	0.928375	1.2116	8.92708	0	-0.173076	-0.0896424	-0.907322	1.3131	-0.0211092	-0.0455302	-0.375237	0.65336	0.326002	0.395993	2.52886	-1.1904	-0.993553	-0.9335	0.702458	-1.1904
ACSM4	0.146894	0.00181793	0.0149914	0.087304	0.93043	0.999738	0	0	0	0	0	0	1.28149	0	0	1.06882	0	0	0	0	0	0	-0.364262	-0.364262	-0.364262	-0.364262	-0.364262	-0.364262	2.81352	-0.364262	-0.364262	2.28615	-0.364262	-0.364262	-0.364262	-0.364262	-0.364262	-0.364262
ACSM6	0.600468	-0.00315322	0.024406	-0.0893093	0.928836	0.999738	0	0	0	0	0	2.69971	0	2.67555	0.550127	0	0	0.896983	2.78512	0	0	0	-0.555258	-0.555258	-0.555258	-0.555258	-0.555258	1.94119	-0.555258	1.91884	-0.0465515	-0.555258	-0.555258	0.274189	2.02017	-0.555258	-0.555258	-0.555258
ACSS1	16.8814	-0.115566	0.108165	-1.09886	0.27183	0.999738	45.58	11.6806	6.00776	2.3614	20.2202	28.347	37.1632	6.68887	13.203	8.01614	10.963	8.96983	36.2066	13.3276	8.92708	12.4401	2.22459	-0.40314	-0.842874	-1.12552	0.258809	0.888761	1.57215	-0.790078	-0.28513	-0.687194	-0.458771	-0.613268	1.498	-0.275476	-0.616582	-0.344272
ACSS2	904.105	-0.0461456	0.0760983	-0.606101	0.544448	0.999738	659.711	1070.72	987.943	800.515	584.548	699.226	612.552	1141.79	1227.33	1097.14	1045.87	806.388	668.43	1193.42	909.446	960.649	-1.12755	0.768718	0.386798	-0.47793	-1.47432	-0.94524	-1.34512	1.09659	1.49126	0.890607	0.654032	-0.450835	-1.08732	1.33481	0.0246417	0.260872
ACSS3	174.111	0.084271	0.106072	0.779011	0.435973	0.999738	167.926	121.998	128.166	105.082	187.496	236.225	275.52	202.004	208.498	249.569	209.758	86.1104	175.463	230.204	87.039	114.725	-0.102257	-0.861597	-0.759622	-1.14126	0.221295	1.02692	1.67659	0.461143	0.568512	1.24754	0.589341	-1.45492	0.0223421	0.92737	-1.43957	-0.981835
ACTA1	4.3972	0.0241987	0.0762385	0.319766	0.749146	0.999738	4.7979	6.48923	4.6727	0	3.6764	4.04957	3.84447	2.00666	6.05139	7.48173	7.30863	4.48491	9.28375	1.2116	2.23177	2.76446	0.161163	0.841425	0.110809	-1.76857	-0.289908	-0.139817	-0.222311	-0.961485	0.665324	1.24061	1.17099	0.0352795	1.96539	-1.28126	-0.870945	-0.656696
ACTA2	1236.73	-0.0225831	0.0551783	-0.397423	0.691056	0.999738	478.59	1966.24	2210.19	2152.42	498.152	543.992	493.373	818.717	876.352	824.594	883.614	2197.61	453.975	886.889	2288.68	2214.33	-0.990331	0.952925	1.27159	1.19612	-0.964778	-0.904899	-0.97102	-0.546036	-0.470751	-0.53836	-0.461264	1.25515	-1.02248	-0.456986	1.37412	1.277
ACTA2-AS1	14.5096	0.0083631	0.0962714	0.0527444	0.957936	0.999738	11.9947	9.08493	7.34282	9.4456	36.764	28.347	5.12596	11.3711	7.70177	17.6355	23.3876	11.6608	18.5675	14.5392	12.2747	6.91114	-0.29109	-0.627889	-0.82953	-0.586142	2.57585	1.60162	-1.08612	-0.363277	-0.787983	0.361806	1.02759	-0.329745	0.469678	0.00341713	-0.258682	-0.879495
ACTB	143284	-0.0199281	0.0819045	-0.244211	0.807067	0.999738	163512	156648	138384	105383	141894	159154	155469	155124	135647	134810	132101	138970	179811	128759	138148	128737	1.14915	0.75916	-0.278385	-2.15316	-0.0789653	0.90153	0.692209	0.672619	-0.433887	-0.481423	-0.63535	-0.245127	2.0751	-0.825195	-0.291817	-0.82646
ACTBL2	12.8098	-0.131652	0.10401	-1.1609	0.245682	0.999738	0	23.3612	25.3661	25.9754	1.8382	1.34986	8.97042	7.35775	1.65038	5.87851	5.11604	22.4246	3.7135	7.26959	30.1289	34.5557	-1.07927	0.889	1.05792	1.10925	-0.924393	-0.965537	-0.323478	-0.459351	-0.940217	-0.583983	-0.648223	0.810082	-0.766392	-0.466779	1.4592	1.83217
ACTC1	3.14485	0.0241665	0.0710891	0.322634	0.746973	0.999738	0	3.89354	2.67012	5.9035	0	0	2.56298	4.01332	7.15164	6.41291	2.92345	2.69095	0	8.48118	2.23177	1.38223	-1.16955	0.278433	-0.17655	1.02593	-1.16955	-1.16955	-0.216394	0.322978	1.4901	1.21537	-0.0823358	-0.168803	-1.16955	1.98455	-0.339569	-0.655508
ACTG1	73724.2	-0.0730103	0.0776656	-0.944903	0.344709	0.999738	97957.5	66090.3	58609.7	44356.5	84231.9	91332.7	88448.4	78404.9	71574.2	69349.3	71764.2	61431.7	99614.6	73948.6	63445.9	59026.7	1.57161	-0.495088	-0.980226	-1.9046	0.681461	1.14197	0.954916	0.303559	-0.139434	-0.28373	-0.127111	-0.797213	1.67908	0.0145571	-0.666585	-0.953184
ACTG1P17	3.41227	-0.0653218	0.0790155	-0.809837	0.418034	0.999738	2.39895	3.89354	2.00259	2.3614	1.8382	2.69971	6.40745	2.67555	2.20051	4.80969	2.19259	3.58793	2.78512	3.63479	5.57943	5.52891	-0.700278	0.33259	-0.974192	-0.726227	-1.08779	-0.492428	2.06988	-0.50913	-0.837416	0.965712	-0.842886	0.121393	-0.433404	0.153777	1.49766	1.46275
ACTG1P4	2.37409	-0.0700966	0.0611093	-1.07457	0.282569	0.999738	1.19947	0	2.67012	2.3614	0	2.69971	1.28149	0.668887	2.20051	2.67205	6.57777	1.79397	5.57025	6.05799	2.23177	0	-0.566373	-1.14473	0.14274	-0.0061169	-1.14473	0.157011	-0.526827	-0.822211	-0.0836966	0.143671	2.02693	-0.279722	1.54112	1.7763	-0.0686218	-1.14473
ACTG2	117.934	-0.0259539	0.115365	-0.163951	0.86977	0.999738	113.95	180.401	199.591	158.214	40.4404	117.438	61.5115	40.8021	37.4086	47.5624	57.0074	264.61	81.697	42.4059	236.568	207.334	-0.0505678	0.792934	1.03653	0.511301	-0.983675	-0.00629869	-0.716206	-0.979084	-1.02216	-0.89327	-0.77338	1.86186	-0.459978	-0.958726	1.5059	1.13482
ACTL10	107.583	-0.0292553	0.105838	-0.28229	0.777721	0.999738	70.769	180.401	74.7633	50.7701	102.939	67.4929	183.253	192.639	106.725	81.2303	84.7802	78.0375	165.251	70.2727	119.4	92.6093	-0.788217	1.55907	-0.702697	-1.21641	-0.0994313	-0.858361	1.62014	1.8211	-0.0183858	-0.564235	-0.488229	-0.632594	1.2347	-0.798844	0.252997	-0.320602
ACTL6A	787.713	0.0374505	0.100363	0.366219	0.714202	0.999738	1020.75	487.99	690.225	846.562	1108.44	1059.64	989.31	538.454	734.969	767.947	695.051	716.689	850.391	804.501	653.909	638.59	1.27918	-1.64521	-0.535122	0.323026	1.76047	1.49262	1.10658	-1.36821	-0.289518	-0.108502	-0.508631	-0.389857	0.344045	0.0921482	-0.734466	-0.818553
ACTL7A	2.3232	0.0534388	0.0601278	0.928568	0.353113	0.999738	2.39895	0	2.00259	4.7228	0	5.39943	5.12596	3.34443	1.10025	2.67205	3.65432	0.896983	4.64187	1.2116	0	0	0.0385703	-1.18297	-0.163256	1.22187	-1.18297	1.5664	1.42715	0.520007	-0.622721	0.177631	0.677799	-0.726225	1.18066	-0.566024	-1.18297	-1.18297
ACTL7B	3.20308	-0.0784251	0.0622013	-1.25038	0.211162	0.999738	4.7979	0	2.67012	0	7.3528	2.69971	5.12596	4.68221	3.30076	1.06882	0	1.79397	7.427	3.63479	6.69531	0	0.605677	-1.21646	-0.20241	-1.21646	1.57598	-0.191169	0.730267	0.56174	0.0370951	-0.810549	-1.21646	-0.535154	1.60415	0.163954	1.32627	-1.21646
ACTL8	2.16074	-0.0183992	0.0648544	-0.323127	0.746599	0.999738	3.59842	1.29785	2.00259	0	3.6764	4.04957	2.56298	0.668887	3.30076	2.13764	1.46173	0.896983	2.78512	3.63479	1.11589	1.38223	1.15097	-0.690808	-0.126612	-1.72983	1.2134	1.51215	0.322021	-1.19434	0.912667	-0.0184943	-0.55961	-1.01173	0.499864	1.18009	-0.836481	-0.623254
ACTN1	23857.3	-0.0568108	0.0821966	-0.687846	0.49155	0.999738	24700.8	31341.7	26020.3	20122.7	23111.7	23721	27284.2	20498.7	19234.6	18836.3	17958	27491.6	23579.8	20329.4	29027.5	28458.7	0.204984	1.81891	0.525661	-0.907624	-0.181206	-0.0331195	0.832825	-0.816239	-1.12344	-1.22024	-1.43369	0.883239	-0.0674478	-0.857384	1.2565	1.11827
ACTN1-AS1	2.27613	0.0807692	0.0597188	1.49521	0.134859	0.999738	1.19947	2.59569	2.00259	0	5.5146	6.74929	1.28149	3.34443	3.85089	3.74087	0.730863	1.79397	0	0	2.23177	1.38223	-0.549657	0.163142	-0.139651	-1.16201	1.65331	2.28364	-0.507787	0.545389	0.803943	0.747777	-0.788893	-0.246157	-1.16201	-1.16201	-0.0226488	-0.456357
ACTN2	3.14033	0.0518003	0.0709592	0.768172	0.442385	0.999738	3.59842	7.78708	1.33506	4.7228	5.5146	0	3.84447	2.00666	2.20051	4.80969	2.19259	2.69095	1.85675	2.4232	1.11589	4.14669	0.235226	2.38607	-0.926995	0.812584	1.21917	-1.61254	0.361567	-0.582133	-0.482594	0.857199	-0.486659	-0.230756	-0.659111	-0.368245	-1.03954	0.516754
ACTN3	2.27396	0.0233163	0.0613213	0.3609	0.718174	0.999738	2.39895	0	2.00259	1.1807	7.3528	4.04957	1.28149	2.00666	1.65038	3.74087	3.65432	0	4.64187	2.4232	0	0	0.0614538	-1.11807	-0.13343	-0.537537	2.49717	0.873035	-0.487981	-0.131428	-0.306604	0.721251	0.678696	-1.11807	1.16426	0.0733752	-1.11807	-1.11807
ACTN4	17805.3	-0.0787803	0.0571676	-1.37775	0.168281	0.999738	17459.6	19214.6	17731.6	15627.7	16882	17023	18130.5	17594.4	17355.9	17765.9	16220.8	18944.3	16710.7	18816.1	20167.4	19240.6	-0.283346	1.15484	-0.0604371	-1.78441	-0.756588	-0.641036	0.266468	-0.172852	-0.368249	-0.0323008	-1.29845	0.933307	-0.896954	0.828281	1.93558	1.17615
ACTR10	610.556	0.0591488	0.10522	0.568382	0.569776	0.999738	590.141	490.586	742.96	756.829	645.209	635.783	447.24	415.379	627.694	629.534	604.424	782.169	479.97	586.413	720.862	613.71	-0.186209	-1.09428	1.20768	1.33418	0.31607	0.230096	-1.48965	-1.78026	0.15632	0.173104	-0.0559339	1.56532	-1.19111	-0.220215	1.00612	0.0287607
ACTR1A	4598.64	-0.0689425	0.0893267	-0.774524	0.438621	0.999738	4629.97	5095.35	4047.23	3292.97	4380.43	4814.94	6126.8	4983.2	4599.61	4310.01	4350.83	4050.77	5271.31	4584.69	4492.55	4547.53	0.0506285	0.802571	-0.890954	-2.10966	-0.352571	0.349497	2.46917	0.621375	0.00156733	-0.466353	-0.400402	-0.885225	1.08689	-0.0225441	-0.171409	-0.0825752
ACTR1B	1783.98	-0.0374826	0.0983567	-0.381204	0.703052	0.999738	1736.84	2231	1812.34	1324.75	1579.01	1704.87	2161.87	2070.87	1826.97	1566.89	1626.17	1601.11	2072.13	1669.58	1766.45	1792.75	-0.193409	1.83421	0.11639	-1.8843	-0.840988	-0.324585	1.55057	1.17719	0.176414	-0.890742	-0.647497	-0.750309	1.18235	-0.469377	-0.0719265	0.0360053
ACTR2	9206.25	0.0148622	0.115232	0.129347	0.897083	0.999738	11596.5	4943.5	9878.1	13520.2	11509	10345.3	7140.46	5329.69	7996.09	9486.3	8334.04	10872.3	8180.84	9521.95	9673.61	8972.05	1.06651	-1.90199	0.299772	1.92483	1.02745	0.508235	-0.92173	-1.72967	-0.539958	0.124959	-0.38917	0.743387	-0.457525	0.140862	0.208531	-0.104497
ACTR3	5334.43	0.0400785	0.0827613	0.484709	0.627883	0.999738	6276.85	4961.67	5349.58	7364.03	6374.88	5742.29	5601.39	3957.8	4149.6	4560.65	4206.85	5861.78	5627.81	4703.42	5225.69	5386.55	1.036	-0.40977	0.016655	2.23112	1.14376	0.448362	0.293468	-1.51331	-1.30246	-0.850604	-1.23953	0.579716	0.322509	-0.693658	-0.119534	0.0572924
ACTR3B	124.897	-0.0166933	0.0915313	-0.180168	0.85702	0.999738	104.354	115.508	137.511	120.431	121.321	118.787	131.993	119.731	121.578	127.724	111.091	150.693	100.264	127.218	139.486	150.663	-1.41083	-0.644799	0.866284	-0.306697	-0.245584	-0.419601	0.487349	-0.35482	-0.227955	0.194131	-0.948155	1.7716	-1.69171	0.159371	1.0019	1.76952
ACTR3BP2	0.158578	0.00182213	0.0149914	0.100609	0.919861	0.999738	1.19947	0	0	0	0	0	0	1.33777	0	0	0	0	0	0	0	0	2.39809	-0.365343	-0.365343	-0.365343	-0.365343	-0.365343	-0.365343	2.71671	-0.365343	-0.365343	-0.365343	-0.365343	-0.365343	-0.365343	-0.365343	-0.365343
ACTR3BP5	0.160186	0.00081879	0.0149914	0.0284465	0.977306	0.999738	0	0	0	0	0	0	2.56298	0	0	0	0	0	0	0	0	0	-0.25	-0.25	-0.25	-0.25	-0.25	-0.25	3.75	-0.25	-0.25	-0.25	-0.25	-0.25	-0.25	-0.25	-0.25	-0.25
ACTR3C	1.53662	-0.015727	0.0534058	-0.391569	0.695376	0.999738	1.19947	0	0	2.3614	0	0	2.56298	2.67555	0.550127	3.74087	2.92345	1.79397	1.85675	2.4232	1.11589	1.38223	-0.281604	-1.28349	-1.28349	0.688915	-1.28349	-1.28349	0.857287	0.951311	-0.823984	1.84114	1.15838	0.214955	0.267396	0.74053	-0.351424	-0.128956
ACTR5	223.087	-0.165552	0.0835768	-1.98135	0.0475517	0.999738	238.695	225.825	210.272	175.924	237.128	238.925	230.668	206.686	209.048	189.715	184.178	233.216	304.507	193.856	219.829	270.917	0.476083	0.0835291	-0.390877	-1.43851	0.428272	0.483077	0.231238	-0.500246	-0.428198	-1.01787	-1.18678	0.308939	2.48341	-0.891587	-0.0993559	1.45888
ACTR6	185.437	0.0390827	0.113034	0.348165	0.727716	0.999738	193.115	120.7	194.918	272.742	222.422	188.98	160.186	146.486	166.688	174.218	165.175	237.7	138.328	226.569	176.31	182.454	0.19558	-1.64895	0.241507	2.22378	0.942069	0.0902454	-0.643175	-0.992134	-0.477555	-0.285776	-0.516099	1.33123	-1.19994	1.04768	-0.232482	-0.0759767
ACTR8	728.226	-0.0585497	0.0982385	-0.599613	0.548764	0.999738	812.044	452.949	642.831	726.131	851.087	776.168	657.404	619.389	789.982	795.736	801.757	753.466	704.636	874.773	729.789	663.47	0.799183	-2.62468	-0.814215	-0.0199761	1.17144	0.457114	-0.675262	-1.03772	0.588824	0.643688	0.7011	0.240655	-0.224916	1.39729	0.0149043	-0.617427
ACTRT3	99.656	-0.148964	0.103353	-1.45139	0.146671	0.999738	149.934	63.5945	81.4385	69.6613	117.645	121.487	117.897	88.9619	111.676	90.8496	74.5481	83.4194	119.76	121.16	92.6185	89.8449	2.12015	-1.52065	-0.768199	-1.26483	0.758561	0.920584	0.769194	-0.450952	0.506851	-0.37135	-1.05876	-0.68467	0.847767	0.906779	-0.296761	-0.413719
ACVR1	1254.28	-0.0276874	0.103602	-0.26363	0.792065	0.999738	1251.05	929.258	1468.56	1432.19	1231.59	1263.47	939.332	961.19	1332.41	1371.83	1328.71	1327.53	919.091	1377.59	1510.91	1423.7	-0.0158319	-1.59627	1.05245	0.873796	-0.111393	0.0451395	-1.5468	-1.43945	0.383729	0.577348	0.365573	0.359801	-1.64621	0.605624	1.26041	0.832081
ACVR1B	1216.83	0.0091207	0.0556876	0.167216	0.8672	0.999738	919.997	1531.46	1493.26	1299.95	1025.72	961.098	1008.53	1174.56	1161.32	1188.53	1223.47	1408.26	892.168	1140.11	1494.17	1546.71	-1.32297	1.40227	1.23203	0.370452	-0.851791	-1.13979	-0.928379	-0.188384	-0.247428	-0.126156	0.029563	0.853192	-1.447	-0.341931	1.23607	1.47026
ACVR1C	3.42429	0.0141849	0.0727809	0.212242	0.831918	0.999738	1.19947	2.59569	1.33506	9.4456	1.8382	4.04957	3.84447	3.34443	2.75063	4.27528	2.19259	5.3819	6.49862	2.4232	2.23177	1.38223	-1.01605	-0.378413	-0.954131	2.74986	-0.724351	0.285557	0.191888	-0.036472	-0.307654	0.388634	-0.562505	0.894015	1.40401	-0.457191	-0.544612	-0.932589
ACVR2A	207.778	-0.033919	0.111796	-0.293155	0.769404	0.999738	215.905	164.827	275.69	332.957	202.202	197.079	173.001	112.373	167.789	182.768	177.6	231.422	155.039	207.183	281.203	247.419	0.146614	-0.774874	1.22515	2.25829	-0.100601	-0.193021	-0.627402	-1.72116	-0.721438	-0.4512	-0.544438	0.426533	-0.951454	-0.0107395	1.32461	0.715133
ACVR2B	249.771	-0.0142081	0.0743552	-0.186642	0.851941	0.999738	196.714	312.781	281.697	317.608	216.908	183.581	220.416	226.084	206.848	218.574	233.145	330.09	218.168	212.03	331.418	290.268	-1.0331	1.22691	0.621664	1.32091	-0.63989	-1.28882	-0.571575	-0.46122	-0.835776	-0.607454	-0.323716	1.56394	-0.615349	-0.734875	1.5898	0.788549
ACVR2B-AS1	5.58664	0.0258348	0.0761069	0.298768	0.765117	0.999738	1.19947	6.48923	2.00259	1.1807	14.7056	5.39943	8.97042	12.04	7.70177	3.74087	2.19259	5.3819	3.7135	6.05799	4.46354	4.14669	-1.1585	0.238344	-0.946425	-1.16346	2.40801	-0.0494363	0.893541	1.7041	0.558533	-0.487406	-0.896252	-0.0540658	-0.494633	0.124467	-0.296572	-0.380243
ACVRL1	1027.03	-0.124142	0.0942751	-1.33561	0.181677	0.999738	728.081	572.35	463.933	371.921	658.076	764.019	817.59	2204.65	1929.29	1970.9	1551.62	441.316	911.664	2047.6	439.659	559.803	-0.450011	-0.684434	-0.847636	-0.986143	-0.55539	-0.395913	-0.315272	1.77268	1.35819	1.42082	0.789675	-0.881682	-0.173662	1.53627	-0.884176	-0.703322
ACY1	541.602	-0.0367624	0.109316	-0.338016	0.735351	0.999738	478.59	743.666	550.044	353.029	424.624	431.954	586.922	738.451	577.083	567.009	545.955	464.637	611.799	585.202	502.148	504.513	-0.601613	1.92925	0.0806044	-1.80043	-1.11686	-1.04688	0.432705	1.87945	0.338762	0.242577	0.0415642	-0.734834	0.670221	0.416279	-0.376689	-0.354107
ACYP1	136.229	0.136572	0.115185	1.18962	0.234196	0.999738	122.346	94.7428	138.179	247.947	143.38	151.184	121.741	94.313	126.529	164.598	120.592	174.015	107.691	144.18	109.357	118.872	-0.370045	-1.10582	0.051959	2.97783	0.190595	0.398619	-0.386169	-1.11727	-0.258556	0.756172	-0.416796	1.00717	-0.760672	0.211931	-0.716284	-0.462664
ACYP2	69.8399	0.0308053	0.108174	0.288784	0.772747	0.999738	43.1811	90.8493	91.4515	108.624	44.1168	36.4461	53.8225	78.2597	50.6116	64.1291	63.5851	107.638	55.7025	65.4263	84.8073	78.787	-1.1827	0.932065	0.958782	1.72065	-1.14119	-1.48149	-0.710598	0.373539	-0.853047	-0.253353	-0.277489	1.67688	-0.627196	-0.195807	0.664016	0.396933
ADA	48.1501	0.0700707	0.113702	0.662169	0.507863	0.999738	25.189	96.0407	106.137	73.2034	22.0584	25.6473	37.1632	17.3911	25.8559	25.6517	26.3111	74.4496	22.281	19.3856	94.8502	78.787	-0.706296	1.47313	1.7837	0.770649	-0.802593	-0.692197	-0.337963	-0.946163	-0.685779	-0.692063	-0.671779	0.808982	-0.795746	-0.884811	1.43652	0.942404
ADAL	108.726	-0.0734808	0.095641	-0.773518	0.439216	0.999738	134.341	80.4665	92.7865	83.8297	141.541	105.289	111.49	121.068	108.925	110.088	108.168	98.6681	108.62	140.545	91.5026	102.285	1.39864	-1.54302	-0.870318	-1.35938	1.79179	-0.187668	0.150902	0.673928	0.0108746	0.0743939	-0.0304731	-0.549173	-0.00579089	1.7374	-0.940425	-0.351689
ADAM10	3141.27	-0.0114032	0.114719	-0.0815071	0.935039	0.999738	2737.2	2137.55	4184.07	4961.3	2755.46	2690.27	1723.6	1852.82	2892.57	3222.49	3215.8	4422.13	1970.94	3380.36	4105.34	4008.46	-0.412179	-1.02386	1.06372	1.85655	-0.39355	-0.460056	-1.44611	-1.31431	-0.253697	0.0828469	0.0760223	1.30655	-1.19382	0.243882	0.983412	0.884591
ADAM11	11.6976	0.0542129	0.107364	0.485997	0.626969	0.999738	17.9921	9.08493	10.0129	5.9035	12.8674	12.1487	12.8149	11.3711	12.1028	16.5667	18.2716	8.07285	18.5675	9.69278	8.92708	2.76446	1.3966	-0.57968	-0.373779	-1.28556	0.259554	0.100095	0.247903	-0.072444	0.0899041	1.08033	1.4586	-0.804235	1.52426	-0.444813	-0.614703	-1.98203
ADAM12	8796.84	0.119257	0.0981275	1.29099	0.196708	0.999738	928.393	24226.9	18683.5	17632.6	913.586	1023.19	1375.04	4191.24	3432.24	3652.15	3963.47	18318.2	734.344	3724.45	18080.7	19869.5	-0.9012	1.76726	1.13235	1.01199	-0.902896	-0.890342	-0.850044	-0.527495	-0.614426	-0.589238	-0.553582	1.09051	-0.923425	-0.580958	1.06331	1.26819
ADAM15	2729.53	0.0151865	0.115057	0.138006	0.890236	0.999738	1327.82	5195.28	3047.94	2033.17	1235.27	1370.11	2219.54	4409.97	3243	2815.8	3028.7	2786.93	1718.42	3007.19	3054.18	3179.13	-1.29526	2.27851	0.294232	-0.64348	-1.38078	-1.25619	-0.471259	1.55283	0.474477	0.0797258	0.276453	0.0530406	-0.934323	0.256574	0.299997	0.415457
ADAM17	895.487	0.0433063	0.0857279	0.515655	0.606095	0.999738	714.887	950.024	1116.78	1183.06	806.97	716.774	618.959	694.973	825.74	884.448	880.69	1204.65	558.882	823.886	1134.86	1212.21	-0.835696	0.252361	1.02398	1.3307	-0.409596	-0.826963	-1.27958	-0.927844	-0.322742	-0.0510811	-0.0684675	1.43059	-1.55758	-0.331319	1.10764	1.4656
ADAM19	9636.15	0.0420676	0.0759123	0.569327	0.569134	0.999738	4091.41	13033	11976.8	10706.6	4229.7	4125.16	4467.27	12320.9	12600.6	11775.7	12573	11451.8	3329.15	11477.5	14277.7	11742	-1.39532	0.854802	0.58902	0.269373	-1.36052	-1.38682	-1.30073	0.675607	0.746007	0.538415	0.739061	0.456898	-1.58714	0.463361	1.16804	0.529939
ADAM1A	48.3822	-0.0338453	0.114876	-0.30594	0.759651	0.999738	76.7664	15.5742	50.7322	34.2403	68.0134	58.0439	35.8817	44.1465	40.1592	56.6474	48.9679	50.231	58.4876	41.1943	53.5625	41.4669	1.97169	-2.27899	0.163241	-0.982359	1.36367	0.67114	-0.86834	-0.29423	-0.571204	0.574137	0.0406813	0.128428	0.701965	-0.499302	0.359844	-0.48037
ADAM20	3.41244	-0.0935923	0.0804304	-1.12436	0.260862	0.999738	2.39895	2.59569	2.00259	3.5421	5.5146	4.04957	3.84447	2.67555	3.30076	1.60323	2.92345	2.69095	6.49862	4.84639	3.34766	2.76446	-0.780322	-0.628842	-1.0855	0.0998303	1.61853	0.490551	0.332634	-0.56736	-0.0859868	-1.39298	-0.376488	-0.555502	2.37616	1.10405	-0.0498799	-0.498905
ADAM20P1	1.75407	-0.00549367	0.0528955	-0.0416654	0.966765	0.999738	0	1.29785	3.33765	3.5421	3.6764	0	0	0	1.65038	0.53441	2.92345	3.58793	2.78512	0	3.34766	1.38223	-1.14894	-0.298834	1.03726	1.17118	1.25915	-1.14894	-1.14894	-1.14894	-0.0679208	-0.798894	0.765958	1.2012	0.67535	-1.14894	1.04381	-0.243563
ADAM21	4.28999	0.0464417	0.0810923	0.600494	0.548177	0.999738	1.19947	2.59569	6.00776	5.9035	9.191	2.69971	2.56298	1.33777	3.85089	4.27528	4.38518	9.86681	2.78512	3.63479	5.57943	2.76446	-1.23318	-0.676062	0.685429	0.643826	1.95561	-0.634556	-0.689116	-1.178	-0.175213	-0.00587141	0.0379829	2.22528	-0.600475	-0.261439	0.514513	-0.608722
ADAM21P1	0.380688	-0.00442676	0.0160067	-0.136058	0.891775	0.999738	0	2.59569	0	0	0	0	0	0	0	0	0.730863	0	0	0	0	2.76446	-0.415444	2.41723	-0.415444	-0.415444	-0.415444	-0.415444	-0.415444	-0.415444	-0.415444	-0.415444	0.382145	-0.415444	-0.415444	-0.415444	-0.415444	2.6014
ADAM22	16.8599	0.219124	0.107868	2.01118	0.0443068	0.999738	23.9895	19.4677	7.34282	12.9877	33.0876	21.5977	14.0964	22.0733	21.4549	19.7732	27.0419	5.3819	11.1405	20.5972	5.57943	4.14669	0.838533	0.306712	-1.11933	-0.455421	1.90859	0.557229	-0.325026	0.613159	0.540436	0.342637	1.19754	-1.34996	-0.672677	0.439551	-1.32673	-1.49524
ADAM23	359.627	-0.0805466	0.0916315	-0.90855	0.363588	0.999738	508.577	137.572	129.501	151.13	542.269	499.447	394.699	416.047	529.772	489.519	505.027	148.002	448.405	510.083	191.932	152.045	0.870949	-1.29841	-1.3456	-1.21913	1.06795	0.817563	0.205074	0.329906	0.994879	0.759512	0.850188	-1.23742	0.519108	0.879751	-0.980549	-1.21378
ADAM28	8.57769	-0.118876	0.0756923	-1.43213	0.152106	0.999738	8.39632	1.29785	7.34282	14.1684	14.7056	8.09914	3.84447	5.35109	8.80202	5.3441	8.77036	0.896983	17.6391	16.9624	15.6224	0	-0.0313651	-1.25895	-0.213553	0.966834	1.05974	-0.0827579	-0.818544	-0.557994	0.0387954	-0.559204	0.0333198	-1.32827	1.56705	1.45001	1.21828	-1.48339
ADAM30	1.71579	-0.0204227	0.0503774	-0.229318	0.818622	0.999738	1.19947	0	0.667529	3.5421	0	4.04957	1.28149	1.33777	1.65038	0.53441	3.65432	0.896983	7.427	1.2116	0	0	-0.256127	-0.851147	-0.520008	0.905974	-0.851147	1.15771	-0.215442	-0.187521	-0.0324474	-0.586044	0.961641	-0.406183	2.83315	-0.250113	-0.851147	-0.851147
ADAM32	25.3755	0.00422724	0.115392	0.03749	0.970094	0.999738	19.1916	27.2548	23.3635	33.0596	25.7348	26.9971	12.8149	24.0799	25.8559	24.5828	32.158	27.8065	14.854	32.7131	27.8971	27.6446	-1.07551	0.326843	-0.349929	1.33642	0.0624884	0.282034	-2.18455	-0.225333	0.083556	-0.137864	1.17961	0.422792	-1.82991	1.27616	0.43856	0.394635
ADAM33	467.674	-0.101589	0.106726	-0.962518	0.33579	0.999738	567.351	369.886	293.713	227.875	514.696	610.135	897.042	547.149	463.757	440.353	382.242	269.992	795.617	481.004	301.289	320.677	0.533003	-0.522895	-0.930216	-1.28227	0.251442	0.761781	2.29595	0.424976	-0.0209457	-0.146089	-0.456829	-1.05706	1.7536	0.0712818	-0.889704	-0.786031
ADAM8	323.451	-0.0936833	0.113419	-0.865914	0.386537	0.999738	447.404	125.891	68.088	59.035	529.402	430.604	870.131	433.438	273.413	222.849	253.61	54.716	1030.5	196.279	80.3437	99.5205	0.426087	-0.679112	-0.87781	-0.908929	0.707954	0.368338	1.87921	0.37808	-0.172007	-0.34582	-0.24008	-0.923776	2.43046	-0.437154	-0.83568	-0.769761
ADAM9	10812.6	0.0356517	0.0971457	0.373219	0.708985	0.999738	9288.73	9332.82	11798.6	15267.6	9481.44	8909.06	7922.17	9261.4	11075.1	12883	12339.2	11921.8	7203.26	13067.1	11447.9	11802.9	-0.711045	-0.690474	0.460042	2.07869	-0.621127	-0.888199	-1.34868	-0.723795	0.122492	0.966036	0.71228	0.517537	-1.68412	1.05192	0.296401	0.462036
ADAMTS10	261.345	0.0312882	0.115403	0.337845	0.73548	0.999738	62.3727	471.118	435.896	270.38	91.91	64.7931	147.371	330.43	343.279	266.67	230.953	299.592	52.9174	331.978	343.693	438.166	-1.41917	1.49621	1.24499	0.064444	-1.2085	-1.40191	-0.812918	0.492748	0.584394	0.0379828	-0.216772	0.272798	-1.48661	0.503788	0.587344	1.26118
ADAMTS12	3338.84	0.0351206	0.0764869	0.4846	0.62796	0.999738	1134.7	5541.81	5934.33	5716.95	1014.69	1212.17	1099.52	2214.68	2503.08	2620.74	3001.66	5782.85	949.727	2388.06	6593.76	5712.75	-1.03181	1.03126	1.21502	1.11325	-1.088	-0.995549	-1.04829	-0.526248	-0.391244	-0.33616	-0.157846	1.1441	-1.11841	-0.445086	1.52371	1.11129
ADAMTS13	98.5435	-0.0485685	0.114496	-0.432621	0.66529	0.999738	62.3727	131.083	98.1268	61.3964	90.0718	68.8427	97.3932	134.446	108.925	133.068	110.36	73.5526	88.1956	100.563	81.4596	136.841	-1.40617	1.26498	-0.0162023	-1.44413	-0.329345	-1.15465	-0.0447215	1.39575	0.40359	1.34217	0.45939	-0.971545	-0.402286	0.0784925	-0.664153	1.48883
ADAMTS14	847.306	-0.0755717	0.114146	-0.612183	0.540417	0.999738	64.7716	1336.78	1142.81	755.648	79.0426	78.2917	142.245	1317.71	1396.22	1363.81	1265.12	706.822	79.8402	1290.35	1397.09	1140.34	-1.38572	0.866772	0.523283	-0.16231	-1.36045	-1.36178	-1.24853	0.832992	0.972027	0.914639	0.73988	-0.248771	-1.35904	0.784552	0.973563	0.518907
ADAMTS15	422.371	-0.0921833	0.106876	-0.856431	0.391759	0.999738	103.155	342.632	310.401	257.393	101.101	113.388	135.838	876.241	939.066	787.185	743.288	277.168	76.1267	863.869	467.556	363.526	-1.01651	-0.253921	-0.356555	-0.525355	-1.02305	-0.983921	-0.912432	1.4453	1.64536	1.16171	1.02193	-0.462383	-1.10258	1.4059	0.143887	-0.187384
ADAMTS16	8.78268	-0.0917864	0.0883676	-1.14236	0.253304	0.999738	8.39632	2.59569	0.667529	2.3614	18.382	5.39943	10.2519	11.3711	9.90228	13.8946	13.8864	2.69095	3.7135	27.8667	2.23177	6.91114	-0.0534126	-0.855338	-1.1219	-0.887728	1.32709	-0.467727	0.203119	0.35784	0.154783	0.70672	0.70558	-0.842169	-0.700803	2.63833	-0.905649	-0.258735
ADAMTS17	37.9611	-0.10128	0.115041	-0.882264	0.377634	0.999738	3.59842	54.5096	54.7374	41.3245	3.6764	5.39943	3.84447	62.8753	42.9099	46.4936	38.7358	62.7888	2.78512	52.0987	62.4896	69.1114	-1.36606	0.657869	0.666926	0.133707	-1.36296	-1.29447	-1.35628	0.990444	0.196732	0.339202	0.0307942	0.987003	-1.39839	0.562027	0.975108	1.23835
ADAMTS18	567.329	0.000730464	0.104936	0.135641	0.892105	0.999738	111.551	1277.08	1336.39	1185.42	130.512	90.4404	125.586	66.2198	56.1129	56.6474	65.0468	1287.17	80.7686	42.4059	1653.74	1512.16	-0.696279	1.08427	1.17488	0.944245	-0.667312	-0.728529	-0.674838	-0.76553	-0.78097	-0.780153	-0.767322	1.09968	-0.743304	-0.80191	1.65968	1.44339
ADAMTS19	20.0349	0.00460283	0.104142	-0.120337	0.904216	0.999738	38.3832	0	0	0	18.382	29.6969	51.2596	34.1132	29.7068	31.5302	21.195	0	40.8485	25.4435	0	0	1.03613	-1.13138	-1.13138	-1.13138	-0.0933413	0.545613	1.76327	0.795007	0.546177	0.649141	0.0655119	-1.13138	1.17535	0.305427	-1.13138	-1.13138
ADAMTS19-AS1	1.10431	-0.024228	0.0367814	-0.628784	0.52949	0.999738	0	0	0	0	1.8382	4.04957	0	1.33777	1.10025	3.20646	0	0	3.7135	2.4232	0	0	-0.742173	-0.742173	-0.742173	-0.742173	0.493226	1.97942	-0.742173	0.156904	-0.00272612	1.41279	-0.742173	-0.742173	1.75356	0.886383	-0.742173	-0.742173
ADAMTS2	4043.08	-0.0115356	0.114858	-0.0934233	0.925567	0.999738	3550.44	7317.26	4355.63	2812.43	3681.92	3525.83	5750.04	4347.76	3058.7	2928.03	2721	3934.17	4416.28	3383.99	4290.58	4615.26	-0.41721	2.77286	0.264691	-1.04223	-0.305868	-0.438058	1.4456	0.25803	-0.833659	-0.944325	-1.11965	-0.0922396	0.316055	-0.558176	0.209601	0.484572
ADAMTS3	148.994	-0.0439081	0.111776	-0.402046	0.68765	0.999738	196.714	67.488	124.828	127.516	209.555	201.129	158.905	105.684	156.786	147.497	166.637	131.856	170.821	203.548	107.125	107.814	1.14852	-1.96168	-0.581627	-0.51694	1.45758	1.25478	0.238533	-1.04238	0.187542	-0.0360264	0.424631	-0.412464	0.525333	1.31302	-1.0077	-0.991122
ADAMTS4	1937.91	0.0723556	0.095919	0.767794	0.442609	0.999738	1470.56	3144.68	2578	2132.34	1402.55	1398.45	2093.95	1803.32	1545.31	1474.44	1539.2	2494.51	1548.53	1330.33	2635.72	2414.75	-0.824882	2.12993	1.12974	0.343165	-0.944916	-0.952145	0.275406	-0.237561	-0.69295	-0.818034	-0.703729	0.982382	-0.687261	-1.07237	1.23162	0.841614
ADAMTS5	1153.72	-0.0386219	0.0784105	-0.50357	0.614564	0.999738	1111.91	450.353	506.655	466.377	976.085	1048.84	944.458	2198.63	1998.61	2152.6	1817.66	417.097	1013.79	2498.31	406.182	451.989	-0.0567559	-0.954834	-0.878403	-0.933081	-0.241145	-0.14238	-0.284079	1.41848	1.14695	1.356	0.901303	-0.999979	-0.189966	1.82531	-1.0148	-0.952613
ADAMTS6	1742.77	0.0065535	0.107791	0.0867413	0.930877	0.999738	1095.12	1661.24	2582	3047.39	1308.8	961.098	973.932	1059.52	1474.89	1322.66	1629.83	3024.63	897.738	1474.51	2851.09	2519.8	-0.826426	-0.104025	1.07091	1.66476	-0.553762	-0.997445	-0.981069	-0.871859	-0.341823	-0.53607	-0.144117	1.63572	-1.0783	-0.342301	1.41427	0.991537
ADAMTS7	1677.98	0.0816676	0.115129	0.84579	0.39767	0.999738	148.735	5266.66	3501.19	2369.67	141.541	188.98	299.868	1106.34	968.773	840.092	821.491	3013.86	123.474	845.695	3508.34	3702.99	-0.935221	2.19468	1.115	0.423004	-0.93962	-0.910609	-0.842794	-0.349592	-0.433721	-0.512417	-0.523793	0.816967	-0.95067	-0.50899	1.11937	1.23841
ADAMTS7P1	10.1401	-0.0701292	0.0958162	-0.627019	0.530647	0.999738	3.59842	28.5526	20.6934	8.2649	0	0	1.28149	6.01998	2.75063	6.41291	6.57777	21.5276	0.928375	7.26959	29.013	19.3512	-0.645035	1.81554	1.04059	-0.184903	-0.999853	-0.999853	-0.873493	-0.406261	-0.72863	-0.367516	-0.35126	1.12285	-0.908311	-0.283045	1.86094	0.908246
ADAMTS8	6.61054	0.0204218	0.084703	0.233474	0.815394	0.999738	9.5958	6.48923	2.00259	2.3614	16.5438	5.39943	11.5334	4.68221	7.15164	8.01614	8.77036	0	15.7824	6.05799	0	1.38223	0.591247	-0.0240248	-0.91263	-0.841565	1.96734	-0.239867	0.975001	-0.381917	0.107169	0.278388	0.427765	-1.30925	1.81653	-0.109435	-1.30925	-1.0355
ADAMTS9	150.506	0.0549447	0.0994903	0.58629	0.55768	0.999738	11.9947	288.122	355.793	357.752	22.0584	26.9971	17.9408	57.5242	68.2157	70.5421	73.0863	326.502	10.2121	70.2727	341.461	309.619	-0.949472	0.943337	1.40721	1.42064	-0.880487	-0.846633	-0.908712	-0.637374	-0.564086	-0.548139	-0.530699	1.20642	-0.961692	-0.549986	1.30897	1.0907
ADAMTS9-AS1	0.740733	0.018642	0.0276154	0.692399	0.488687	0.999738	0	0	2.00259	3.5421	0	0	0	0	0	1.60323	0	3.58793	0	0	1.11589	0	-0.57999	-0.57999	0.988024	2.19345	-0.57999	-0.57999	-0.57999	-0.57999	-0.57999	0.675329	-0.57999	2.22934	-0.57999	-0.57999	0.293742	-0.57999
ADAMTS9-AS2	2.1503	0.0511299	0.0601559	0.888176	0.374446	0.999738	1.19947	3.89354	4.00517	9.4456	0	0	0	4.68221	1.10025	1.06882	1.46173	1.79397	0.928375	1.2116	2.23177	1.38223	-0.395419	0.724965	0.77139	3.0339	-0.894245	-0.894245	-0.894245	1.05295	-0.436682	-0.449755	-0.286356	-0.148187	-0.508161	-0.390377	0.0338828	-0.319417
ADAMTSL1	1822.1	0.0761003	0.0947991	0.822267	0.410925	0.999738	776.06	2646.31	2551.96	1922.18	1108.44	728.923	865.005	1953.15	2299.53	1932.42	2343.15	2473.88	676.785	2108.18	2477.26	2290.35	-1.43845	1.1334	1.00366	0.137624	-0.981386	-1.50327	-1.31614	0.180211	0.656531	0.151713	0.716514	0.896286	-1.57496	0.3934	0.900942	0.643913
ADAMTSL2	176.437	0.041796	0.108822	0.616672	0.537451	0.999738	0	763.134	438.567	308.163	1.8382	2.69971	6.40745	12.04	8.2519	11.757	8.0395	384.806	0	10.9044	366.01	500.367	-0.718468	2.38909	1.06742	0.536403	-0.710983	-0.707474	-0.692376	-0.66944	-0.684865	-0.670592	-0.68573	0.848501	-0.718468	-0.674064	0.771964	1.31908
ADAMTSL3	30.0066	0.196964	0.111681	1.71985	0.0854605	0.999738	71.9685	5.19139	5.34023	7.0842	104.777	58.0439	62.793	22.7421	18.1542	16.5667	20.4642	7.17586	63.1295	13.3276	3.34766	0	1.32984	-0.786439	-0.781722	-0.726453	2.36962	0.888549	1.03906	-0.230225	-0.375626	-0.425936	-0.302418	-0.723548	1.04972	-0.528589	-0.84487	-0.950963
ADAMTSL4	1494.51	0.0283302	0.113275	0.220434	0.825533	0.999738	1816	889.025	582.753	486.448	1573.5	1760.21	2785.96	2722.37	1995.31	1791.34	1694.87	483.474	2291.23	1978.54	505.496	555.656	0.399796	-0.75296	-1.13383	-1.25359	0.098227	0.330417	1.60599	1.52692	0.622772	0.369126	0.249161	-1.25729	0.990767	0.601918	-1.2299	-1.16753
ADAMTSL5	113.1	-0.00625154	0.115109	-0.0840381	0.933026	0.999738	115.15	124.593	77.4334	46.0473	79.0426	80.9914	133.275	241.468	152.385	138.412	133.017	67.2737	104.906	130.853	71.4166	113.343	0.0445173	0.249682	-0.774866	-1.45673	-0.739905	-0.697568	0.43829	2.78879	0.853458	0.549895	0.432691	-0.995585	-0.178017	0.385665	-0.90558	0.00526456
ADAP1	114.007	0.0335815	0.115093	0.346426	0.729023	0.999738	57.5748	363.397	185.573	174.744	60.6606	67.4929	80.7338	48.1598	35.7582	27.7893	29.9654	183.881	64.0578	37.5595	195.28	211.481	-0.59575	2.6328	0.755522	0.641196	-0.563173	-0.491045	-0.351261	-0.695143	-0.826066	-0.910194	-0.887221	0.737664	-0.527308	-0.80705	0.857996	1.02903
ADAP2	25.3824	-0.0629663	0.106292	-0.628299	0.529808	0.999738	47.979	0	3.33765	1.1807	38.6022	43.1954	35.8817	23.411	42.9099	37.9431	27.0419	2.69095	74.27	25.4435	2.23177	0	1.01834	-1.14389	-0.993478	-1.09068	0.595768	0.802767	0.473164	-0.0888437	0.789898	0.566063	0.0747886	-1.02262	2.20318	0.00275457	-1.04332	-1.14389
ADAR	7192.5	-0.0787443	0.0988351	-0.795481	0.426334	0.999738	7338.39	5888.33	8090.45	6824.45	7124.87	7483.61	5372	5448.75	7260.57	7463.56	7838.51	8121.28	6122.63	7582.18	9392.4	7728.04	0.137483	-1.22907	0.846244	-0.346861	-0.06374	0.274344	-1.71567	-1.64334	0.0641488	0.255454	0.60881	0.875299	-1.00826	0.367238	2.07323	0.504701
ADARB1	1597.52	-0.0460464	0.0457922	-1.00673	0.314063	0.999738	1279.84	1537.95	1562.02	1473.51	1272.04	1355.26	1289.18	1975.89	1978.25	1939.37	1877.59	1552.68	1491.9	1971.27	1528.76	1474.84	-1.2083	-0.226585	-0.135036	-0.471662	-1.23799	-0.921453	-1.17278	1.43913	1.44812	1.30023	1.06523	-0.170564	-0.401737	1.42155	-0.261524	-0.466625
ADARB2	0.287647	0.00406962	0.0150009	0.301535	0.763007	0.999738	0	2.59569	0	0	0	0	0	2.00666	0	0	0	0	0	0	0	0	-0.362584	2.90933	-0.362584	-0.362584	-0.362584	-0.362584	-0.362584	2.16685	-0.362584	-0.362584	-0.362584	-0.362584	-0.362584	-0.362584	-0.362584	-0.362584
ADAT1	757.974	-0.128546	0.084828	-1.51771	0.129089	0.999738	742.475	574.946	658.851	637.578	814.323	776.168	617.678	721.729	845.544	872.691	887.268	757.951	733.416	1008.05	816.828	662.088	-0.135621	-1.60154	-0.867348	-1.05349	0.493069	0.159202	-1.22763	-0.317155	0.766265	1.0038	1.13136	-0.000204481	-0.214888	2.18822	0.514987	-0.83903
ADAT2	114.62	-0.112021	0.113319	-0.995275	0.319603	0.999738	110.352	55.8074	88.1138	112.167	189.335	134.986	94.8302	91.6375	130.93	131.465	125.709	86.1104	132.758	161.142	95.9661	92.6093	-0.131038	-1.80562	-0.813769	-0.0753192	2.29385	0.625261	-0.607567	-0.705589	0.500749	0.517163	0.340439	-0.875278	0.556854	1.42831	-0.572693	-0.675751
ADAT3	191.635	0.0150788	0.110987	0.147969	0.882367	0.999738	177.522	355.61	178.898	122.793	124.998	167.382	333.187	274.912	152.385	135.74	122.785	153.384	263.658	119.948	161.803	221.157	-0.18537	2.15377	-0.167303	-0.904228	-0.875268	-0.318556	1.85925	1.09383	-0.515541	-0.73417	-0.90433	-0.50242	0.946008	-0.941592	-0.391834	0.387757
ADCK1	96.6285	-0.0823438	0.110239	-0.743475	0.457194	0.999738	85.1627	132.38	102.799	72.0227	62.4988	62.0934	82.0153	134.446	109.475	90.8496	86.2419	101.359	68.6997	117.525	112.704	125.783	-0.475869	1.48382	0.256114	-1.02122	-1.41649	-1.43332	-0.606496	1.56955	0.533176	-0.239844	-0.431079	0.196332	-1.15914	0.867269	0.667199	1.21
ADCK2	360.406	0.0580134	0.112438	0.526526	0.598523	0.999738	303.467	628.158	428.554	272.742	323.523	325.316	463.899	378.59	278.914	274.152	302.577	366.866	374.135	250.801	399.487	395.317	-0.603983	2.84019	0.722878	-0.929903	-0.391235	-0.372224	1.09781	0.192884	-0.864429	-0.914943	-0.613419	0.0685234	0.14563	-1.16264	0.41455	0.370323
ADCK3	236.633	-0.0321092	0.0944499	-0.337507	0.735734	0.999738	164.328	307.59	287.038	230.237	198.526	187.63	211.446	268.892	232.704	247.432	244.839	211.688	207.028	205.972	271.16	309.619	-1.68775	1.65628	1.17655	-0.149305	-0.889503	-1.14383	-0.587922	0.753005	-0.0917202	0.252065	0.191554	-0.582268	-0.691052	-0.7157	0.805937	1.70366
ADCK4	622.292	-0.0299824	0.114327	-0.265171	0.790877	0.999738	442.606	859.175	580.083	460.473	430.139	607.436	875.257	847.479	661.252	622.587	586.883	450.285	656.361	621.55	584.724	670.381	-1.25917	1.65999	-0.295787	-1.13397	-1.34654	-0.104107	1.77269	1.57803	0.273019	0.00206873	-0.248131	-1.20536	0.238743	-0.00520208	-0.263264	0.336991
ADCK5	397.195	-0.0159641	0.113986	-0.147546	0.882701	0.999738	305.866	572.35	282.365	237.321	349.258	353.663	695.849	672.9	380.688	340.419	308.424	271.786	538.457	404.674	307.984	333.117	-0.63907	1.22564	-0.803519	-1.11871	-0.335436	-0.304616	2.08981	1.92923	-0.11551	-0.397288	-0.621168	-0.877545	0.988476	0.0523311	-0.624248	-0.448382
ADCY1	42.5087	0.0484152	0.105109	0.471737	0.637114	0.999738	45.58	40.2332	29.3713	33.0596	132.35	18.898	53.8225	42.8087	27.5063	19.7732	40.1975	43.0552	66.843	23.0204	34.5924	29.0268	0.11343	-0.0840345	-0.485183	-0.348968	3.31799	-0.871977	0.417839	0.0110822	-0.554059	-0.839656	-0.0853551	0.0201835	0.898702	-0.719732	-0.292358	-0.497905
ADCY10	4.44382	-0.0125538	0.0724584	-0.186094	0.852371	0.999738	2.39895	6.48923	6.00776	10.6263	3.6764	1.34986	1.28149	2.00666	9.35215	2.13764	4.38518	2.69095	3.7135	6.05799	8.92708	0	-0.645339	0.645509	0.493562	1.95112	-0.242189	-0.97642	-0.997996	-0.769141	1.54901	-0.727805	-0.0185062	-0.553187	-0.230482	0.509413	1.41487	-1.40242
ADCY10P1	24.4794	-0.108003	0.114327	-0.957265	0.338434	0.999738	16.7926	19.4677	15.3532	17.7105	20.2202	43.1954	15.3779	21.4044	34.1078	31.5302	28.5037	21.5276	31.5647	32.7131	20.0859	22.1157	-0.948937	-0.618699	-1.12664	-0.835627	-0.525801	2.3105	-1.12359	-0.379616	1.18864	0.87042	0.496798	-0.364405	0.874688	1.01646	-0.542378	-0.291807
ADCY2	1.1242	-0.00587147	0.0412646	-0.0607954	0.951522	0.999738	4.7979	0	0	0	1.8382	2.69971	1.28149	0	1.10025	0	0.730863	0.896983	4.64187	0	0	0	2.27238	-0.695382	-0.695382	-0.695382	0.441646	0.974539	0.0972891	-0.695382	-0.0148154	-0.695382	-0.243303	-0.140549	2.17587	-0.695382	-0.695382	-0.695382
ADCY3	1914.27	-0.108322	0.0820107	-1.32241	0.186031	0.999738	2097.88	2084.34	1848.39	1335.37	1996.29	2166.52	2196.47	1818.7	1702.64	1683.39	1653.94	1923.13	2067.49	1897.36	2119.07	2037.41	0.791075	0.732742	-0.283875	-2.49423	0.35335	1.08681	1.21586	-0.411777	-0.91183	-0.994776	-1.12165	0.0381589	0.660136	-0.0728695	0.882351	0.530512
ADCY4	31.8438	-0.0521179	0.112035	-0.415578	0.677718	0.999738	16.7926	85.6579	54.0699	47.228	27.573	14.8484	20.5038	14.7155	10.4524	19.2387	17.5407	29.6004	14.854	25.4435	44.6354	66.347	-0.6922	2.47489	1.02217	0.707513	-0.196414	-0.781614	-0.521524	-0.787727	-0.983786	-0.579705	-0.657796	-0.103173	-0.781358	-0.294347	0.58828	1.58679
ADCY5	6.39827	0.023409	0.0935709	0.276228	0.782373	0.999738	2.39895	11.6806	6.00776	7.0842	11.0292	2.69971	5.12596	4.68221	4.40101	4.80969	6.57777	11.6608	8.35537	3.63479	6.69531	5.52891	-1.35455	1.78911	-0.132262	0.232323	1.56848	-1.25268	-0.430925	-0.581222	-0.676461	-0.538045	0.0607977	1.78239	0.662863	-0.935976	0.100608	-0.294445
ADCY6	2444.36	-0.0262557	0.0992683	-0.259898	0.794943	0.999738	1847.19	3654.74	2690.14	2160.68	1683.79	1765.61	2432.27	2859.49	2663.16	2350.87	2332.92	2471.19	2030.36	2539.51	2649.11	2978.7	-1.19405	2.42018	0.491451	-0.567217	-1.52077	-1.35716	-0.0241766	0.830065	0.437505	-0.186935	-0.22283	0.0536471	-0.827806	0.190256	0.409408	1.06843
ADCY7	2923.49	-0.0618667	0.103426	-0.598664	0.549397	0.999738	2839.16	3627.48	2710.17	2017.82	2797.74	2832	3867.53	3490.25	2868.36	2551.27	2391.39	2664.94	3447.98	2945.39	2817.61	2906.83	-0.177572	1.48222	-0.449152	-1.90688	-0.264769	-0.192638	1.98764	1.19328	-0.116085	-0.783704	-1.12034	-0.544387	1.10429	0.0461078	-0.222937	-0.0350935
ADCY8	1.16195	-0.00464525	0.0445936	-0.124561	0.900871	0.999738	0	0	1.33506	0	3.6764	2.69971	3.84447	0.668887	0.550127	0	1.46173	0	1.85675	0	1.11589	1.38223	-0.895498	-0.895498	0.133409	-0.895498	1.93784	1.18513	2.06737	-0.379998	-0.471524	-0.895498	0.231031	-0.895498	0.535468	-0.895498	-0.0355037	0.169763
ADCY9	1475.75	-0.0790269	0.0653188	-1.20913	0.226614	0.999738	1564.11	1641.78	1464.56	1298.77	1319.83	1482.14	1485.25	1362.52	1450.13	1368.62	1326.52	1618.16	1461.26	1491.48	1727.39	1549.48	0.716763	1.34671	-0.0907742	-1.43555	-1.26474	0.0518593	0.0770276	-0.918436	-0.207784	-0.868949	-1.21048	1.15512	-0.117519	0.127567	2.04115	0.598041
ADCYAP1R1	2.69412	-0.0399056	0.0635585	-0.479128	0.631848	0.999738	7.19685	1.29785	0.667529	0	5.5146	4.04957	7.68894	1.33777	1.10025	0.53441	1.46173	0	11.1405	0	1.11589	0	1.32015	-0.409371	-0.594173	-0.789886	0.826935	0.397404	1.46443	-0.397665	-0.467303	-0.633203	-0.361323	-0.789886	2.47639	-0.789886	-0.46272	-0.789886
ADD1	6909.44	-0.0677009	0.0332965	-2.03403	0.0419482	0.999738	7478.72	6073.92	6354.88	6320.29	7132.22	7333.77	6870.06	6825.99	7165.95	7281.86	7183.66	6342.57	7597.82	7406.5	6779	6403.87	1.17691	-1.72732	-1.14649	-1.218	0.460562	0.877248	-0.0814091	-0.172531	0.530291	0.769932	0.566902	-1.17194	1.42312	1.02759	-0.269667	-1.04521
ADD2	4.60782	0.0260542	0.0781142	0.580233	0.561758	0.999738	3.59842	5.19139	10.6805	15.3491	3.6764	0	3.84447	0.668887	0	0.53441	1.46173	8.07285	0.928375	0	10.043	9.6756	-0.211539	0.122299	1.27265	2.25106	-0.195197	-0.965662	-0.159975	-0.825484	-0.965662	-0.853666	-0.659328	0.726168	-0.771103	-0.965662	1.13905	1.06206
ADD3	2641.14	0.0297781	0.114069	0.297075	0.766409	0.999738	2082.29	1508.1	3723.48	4817.26	2185.62	1883.05	1035.44	1378.58	2741.83	2985.75	3098.13	3784.37	1319.22	2705.5	3635.55	3374.02	-0.519178	-1.05261	1.00551	2.02165	-0.42318	-0.704272	-1.49171	-1.17294	0.0935466	0.320148	0.424554	1.06208	-1.22808	0.0597926	0.923828	0.68086
ADD3-AS1	1.79652	-0.0363639	0.0513536	-0.947033	0.343622	0.999738	0	2.59569	1.33506	1.1807	0	0	0	0.668887	2.20051	1.60323	5.11604	4.48491	3.7135	0	4.46354	1.38223	-1.0038	0.446536	-0.257839	-0.344086	-1.0038	-1.0038	-1.0038	-0.63006	0.225726	-0.108	1.85477	1.50213	1.07111	-1.0038	1.49019	-0.231483
ADGRA2	7181.23	-0.0128432	0.112032	-0.125953	0.899769	0.999738	6911.37	8034.97	5858.24	3843.18	6264.59	7398.57	10779.9	10399.2	8019.74	7629.23	7152.96	4791.68	8758.29	7570.06	5506.89	5980.9	-0.145804	0.461267	-0.714806	-1.80353	-0.495257	0.117424	1.94433	1.73863	0.453041	0.242049	-0.0152757	-1.29106	0.85207	0.210081	-0.904634	-0.64853
ADGRA3	3828.78	-0.0472999	0.075637	-0.625994	0.531319	0.999738	2864.35	3118.73	3632.69	3681.42	2970.53	3195.11	3170.4	4135.06	4869.17	5416.78	5281.95	3271.3	2679.29	5486.11	3827.49	3660.14	-1.02488	-0.754554	-0.208377	-0.156594	-0.912033	-0.67338	-0.699636	0.325468	1.10559	1.68751	1.54423	-0.592422	-1.22153	1.76119	-0.00137774	-0.179209
ADGRB1	0.901318	0.0119965	0.0358659	0.447595	0.654446	0.999738	0	2.59569	0.667529	0	0	0	5.12596	0	0.550127	1.06882	0.730863	0.896983	2.78512	0	0	0	-0.626951	1.1786	-0.162622	-0.626951	-0.626951	-0.626951	2.93863	-0.626951	-0.244287	0.116512	-0.118567	-0.00301583	1.31036	-0.626951	-0.626951	-0.626951
ADGRB2	1569.64	0.0567399	0.111032	0.545156	0.585646	0.999738	604.535	3723.52	2749.55	1737.99	599.254	662.78	964.961	1484.93	1219.63	1107.3	1203	2229	674	1081.96	2482.84	2588.91	-1.03883	2.31843	1.27006	0.181217	-1.04452	-0.976136	-0.650869	-0.0911787	-0.376744	-0.49766	-0.394644	0.70974	-0.964058	-0.524936	0.982974	1.09715
ADGRB3	1.49635	0.00735417	0.0463093	0.159718	0.873103	0.999738	0	3.89354	0	0	0	1.34986	1.28149	1.33777	4.40101	4.27528	0.730863	0.896983	0.928375	4.84639	0	0	-0.837149	1.34114	-0.837149	-0.837149	-0.837149	-0.0819557	-0.120205	-0.0887163	1.62505	1.5547	-0.428259	-0.335321	-0.317759	1.87422	-0.837149	-0.837149
ADGRE1	0.542452	-0.0314437	0.0290607	-0.880903	0.37837	0.999738	0	0	0	1.1807	0	0	0	1.33777	0	1.06882	0	0	0	1.2116	1.11589	2.76446	-0.665251	-0.665251	-0.665251	0.782733	-0.665251	-0.665251	-0.665251	0.975364	-0.665251	0.645525	-0.665251	-0.665251	-0.665251	0.820625	0.703245	2.72502
ADGRE2	114.472	0.0162906	0.108581	0.195227	0.845215	0.999738	81.5643	159.635	199.591	184.189	82.719	89.0906	74.3264	40.1332	39.059	52.9065	62.1234	232.319	64.0578	46.0407	245.495	178.307	-0.454634	0.623937	1.17594	0.963159	-0.438681	-0.350656	-0.554628	-1.02702	-1.04186	-0.850549	-0.723216	1.62808	-0.69649	-0.945402	1.81011	0.881901
ADGRE4P	1.34326	0.0052668	0.0331468	0.444426	0.656734	0.999738	0	0	2.00259	1.1807	0	0	5.12596	0.668887	0	1.60323	0	5.3819	0	0	0	5.52891	-0.643494	-0.643494	0.315853	-0.0778752	-0.643494	-0.643494	1.81211	-0.323061	-0.643494	0.124539	-0.643494	1.93472	-0.643494	-0.643494	-0.643494	2.00515
ADGRE5	4633.87	-0.0489991	0.0765104	-0.638818	0.522941	0.999738	5388.04	5216.05	4904.34	3814.84	4396.98	5002.57	4955.52	4215.99	4206.27	3847.75	3948.12	4969.28	5634.31	3812.9	5223.46	4605.59	1.24223	0.958929	0.445493	-1.34908	-0.390209	0.607301	0.529799	-0.68832	-0.704337	-1.29487	-1.12954	0.552474	1.64787	-1.35228	0.971138	-0.0465961
ADGRF1	0.481581	0.00530666	0.0150053	0.164214	0.869562	0.999738	0	1.29785	0	0	0	0	6.40745	0	0	0	0	0	0	0	0	0	-0.298553	0.506038	-0.298553	-0.298553	-0.298553	-0.298553	3.6737	-0.298553	-0.298553	-0.298553	-0.298553	-0.298553	-0.298553	-0.298553	-0.298553	-0.298553
ADGRF2	0.415244	0.0126234	0.0209483	0.556759	0.577692	0.999738	0	0	2.00259	0	0	0	1.28149	0.668887	0	0	0	2.69095	0	0	0	0	-0.494378	-0.494378	1.88984	-0.494378	-0.494378	-0.494378	1.03132	0.301979	-0.494378	-0.494378	-0.494378	2.70938	-0.494378	-0.494378	-0.494378	-0.494378
ADGRF3	29.8997	0.0275135	0.112834	0.226852	0.820538	0.999738	28.7874	28.5526	16.0207	12.9877	40.4404	32.3966	64.0745	38.1265	33.5577	20.3076	24.1185	30.4974	36.2066	31.5015	20.0859	20.7334	-0.0919193	-0.111319	-1.14694	-1.39758	0.87107	0.206338	2.82415	0.679854	0.302294	-0.79268	-0.47775	0.0493949	0.521194	0.132374	-0.810995	-0.757487
ADGRF4	53.3605	-0.0322858	0.113344	-0.183469	0.85443	0.999738	17.9921	81.7643	123.493	107.444	29.4112	21.5977	38.4447	4.01332	4.40101	5.3441	9.50123	148.899	16.7107	13.3276	95.9661	135.458	-0.673256	0.540682	1.33501	1.0295	-0.455887	-0.604621	-0.283931	-0.939349	-0.93197	-0.914017	-0.834884	1.81863	-0.697647	-0.762048	0.81102	1.56278
ADGRF5	37.0095	0.0646524	0.110586	0.616617	0.537487	0.999738	9.5958	41.5311	50.0647	49.5894	14.7056	2.69971	2.56298	29.431	67.1154	61.4571	72.3555	43.9522	2.78512	64.2147	52.4466	27.6446	-1.11555	0.184	0.531259	0.511919	-0.907616	-1.39618	-1.40174	-0.308392	1.22511	0.994854	1.43834	0.282521	-1.3927	1.10707	0.628187	-0.381088
ADGRG1	734.835	-0.15306	0.0921022	-1.66752	0.0954107	0.999738	183.52	787.793	772.331	533.676	176.467	182.231	157.623	1389.95	1461.69	1158.07	1181.81	628.785	211.669	1291.56	830.218	809.986	-1.18533	0.113859	0.080616	-0.432493	-1.2005	-1.1881	-1.24101	1.40849	1.56273	0.909948	0.96099	-0.228009	-1.12481	1.19697	0.205074	0.161574
ADGRG2	5.99696	0.0984537	0.0739026	1.3551	0.175386	0.999738	3.59842	1.29785	3.33765	8.2649	3.6764	1.34986	0	8.02664	11.5527	11.757	21.9259	4.48491	0.928375	15.7508	0	0	-0.373096	-0.730954	-0.41366	0.352782	-0.360966	-0.722864	-0.932836	0.31572	0.864198	0.895985	2.47777	-0.235201	-0.788426	1.51722	-0.932836	-0.932836
ADGRG3	0.213184	-0.00216066	0.0149914	-0.108014	0.913985	0.999738	0	1.29785	0	0	0	0	0	0	0	0	0.730863	0	0	0	0	1.38223	-0.447646	2.27759	-0.447646	-0.447646	-0.447646	-0.447646	-0.447646	-0.447646	-0.447646	-0.447646	1.08703	-0.447646	-0.447646	-0.447646	-0.447646	2.45478
ADGRG4	0.378522	-0.00499601	0.0165599	-0.167829	0.866718	0.999738	0	0	0	2.3614	1.8382	0	0	0	0	0	0	0	1.85675	0	0	0	-0.461058	-0.461058	-0.461058	2.41524	1.77796	-0.461058	-0.461058	-0.461058	-0.461058	-0.461058	-0.461058	-0.461058	1.80055	-0.461058	-0.461058	-0.461058
ADGRG5	0.270331	-0.00168075	0.0192043	0.0234434	0.981297	0.999738	0	1.29785	0	1.1807	0	0	0	0	0	0	0.730863	0	0	0	1.11589	0	-0.545146	2.07208	-0.545146	1.83584	-0.545146	-0.545146	-0.545146	-0.545146	-0.545146	-0.545146	0.928705	-0.545146	-0.545146	-0.545146	1.70513	-0.545146
ADGRG6	36.7594	-0.0932082	0.113545	-0.868796	0.384959	0.999738	105.554	16.872	13.3506	11.807	82.719	103.939	49.9781	7.35775	15.9537	13.8946	12.4247	19.7336	73.3416	18.174	22.3177	20.7334	1.98868	-0.574896	-0.676692	-0.721314	1.32858	1.942	0.38212	-0.849931	-0.601443	-0.660965	-0.703458	-0.492174	1.0575	-0.53726	-0.417475	-0.463272
ADGRL1	455.555	-0.0317545	0.105953	-0.272657	0.785117	0.999738	166.727	1047.36	744.962	558.471	211.393	166.032	238.357	392.636	346.03	292.856	349.353	666.458	187.532	384.076	748.759	787.87	-1.07137	2.19524	1.07353	0.381757	-0.90569	-1.07395	-0.805671	-0.233389	-0.406271	-0.603511	-0.393944	0.782323	-0.994201	-0.265141	1.08761	1.23269
ADGRL2	1348.93	-0.0339173	0.114215	-0.246829	0.80504	0.999738	1000.36	874.749	1990.57	2145.33	911.748	855.809	490.81	578.587	1227.33	1285.79	1381.33	2487.33	598.802	1279.45	2394.69	2080.25	-0.5228	-0.711199	0.962349	1.19446	-0.655707	-0.739605	-1.28704	-1.15539	-0.182383	-0.0947067	0.0485912	1.70741	-1.12507	-0.104219	1.56846	1.09686
ADGRL3	14.042	-0.0853968	0.109171	-0.72087	0.470989	0.999738	11.9947	12.9785	22.696	18.8912	16.5438	9.449	3.84447	11.3711	7.15164	9.08496	6.57777	23.3216	12.9972	6.05799	32.3607	19.3512	-0.266577	-0.138484	1.12686	0.631429	0.325769	-0.598065	-1.32785	-0.347787	-0.897209	-0.645467	-0.971935	1.20832	-0.136039	-1.03962	2.38532	0.691327
ADGRL4	715.021	0.0112494	0.114943	0.163639	0.870015	0.999738	383.832	443.864	1188.87	1353.08	363.964	360.412	225.542	407.352	701.411	751.38	737.441	1245.91	220.953	691.822	1258.72	1105.78	-0.832336	-0.681466	1.19086	1.60356	-0.882268	-0.891195	-1.23015	-0.773226	-0.0342034	0.0913763	0.0563462	1.33422	-1.24168	-0.0583024	1.36641	0.982054
ADGRV1	1.97865	-0.00503961	0.0505754	-0.108212	0.913827	0.999738	4.7979	2.59569	0.667529	3.5421	5.5146	0	0	0	2.20051	0.53441	2.19259	1.79397	1.85675	4.84639	1.11589	0	1.51632	0.331876	-0.705176	0.840895	1.90179	-1.0642	-1.0642	-1.0642	0.119327	-0.776773	0.115069	-0.0993286	-0.0655609	1.5424	-0.46403	-1.0642
ADH1B	1.11932	0.0257075	0.0392393	0.369205	0.711975	0.999738	1.19947	0	0	0	0	1.34986	0	0.668887	2.20051	6.41291	3.65432	0	0	2.4232	0	0	0.0444125	-0.620216	-0.620216	-0.620216	-0.620216	0.127739	-0.620216	-0.249586	0.599084	2.93318	1.40464	-0.620216	-0.620216	0.722475	-0.620216	-0.620216
ADH1C	2.45537	-0.0114508	0.0522262	-0.385433	0.699917	0.999738	8.39632	0	0	0	1.8382	2.69971	0	4.01332	2.75063	2.67205	6.57777	0	1.85675	8.48118	0	0	1.98649	-0.82101	-0.82101	-0.82101	-0.206365	0.0817018	-0.82101	0.520936	0.0987275	0.0724508	1.37842	-0.82101	-0.200163	2.01487	-0.82101	-0.82101
ADH4	0.786224	-0.0486675	0.0362379	-1.06144	0.288489	0.999738	0	0	0	0	0	1.34986	1.28149	0	0.550127	1.06882	2.19259	0	3.7135	2.4232	0	0	-0.689769	-0.689769	-0.689769	-0.689769	-0.689769	0.494487	0.434506	-0.689769	-0.207132	0.247927	1.23383	-0.689769	2.56816	1.43615	-0.689769	-0.689769
ADH5	2310.84	0.0247233	0.0886444	0.274889	0.783401	0.999738	2583.67	1600.25	2033.29	2530.24	2757.3	2672.72	2523.25	1984.59	2349.59	2578.53	2458.62	2027.18	2384.07	2676.42	1886.96	1926.83	0.781521	-2.03555	-0.795058	0.628474	1.2789	1.03661	0.608456	-0.934583	0.110992	0.766791	0.423327	-0.812567	0.209749	1.04721	-1.21423	-1.10004
ADH6	1.7502	-0.00279205	0.0420557	-0.395887	0.692189	0.999738	0	0	1.33506	0	9.191	2.69971	1.28149	2.00666	0	3.74087	1.46173	0	0.928375	1.2116	0	4.14669	-0.731544	-0.731544	-0.17352	-0.731544	3.11009	0.396877	-0.19591	0.107195	-0.731544	0.832055	-0.120575	-0.731544	-0.343504	-0.225123	-0.731544	1.00168
ADHFE1	21.6145	-0.096377	0.114498	-0.881413	0.378094	0.999738	15.5932	6.48923	13.3506	8.2649	22.0584	32.3966	19.2223	24.0799	31.9073	34.2022	37.274	12.5578	22.281	37.5595	13.3906	15.2045	-0.583958	-1.46687	-0.801447	-1.29466	0.0430504	1.04566	-0.231996	0.239099	0.998212	1.22077	1.51868	-0.878336	0.0646365	1.54637	-0.797564	-0.62165
ADI1	1176.47	0.10825	0.0853001	1.27074	0.203822	0.999738	949.984	1556.12	1297.68	1490.04	933.806	1075.84	1300.71	1214.7	1108.5	1121.73	1068.52	1213.62	1013.79	1111.04	1072.37	1295.15	-1.27859	2.14319	0.684222	1.77018	-1.36992	-0.568125	0.701355	0.215786	-0.383701	-0.309067	-0.609413	0.209688	-0.918419	-0.369418	-0.587717	0.669949
ADIG	0.218292	0.00198153	0.0149914	0.221081	0.82503	0.999738	0	2.59569	0	0	0	0	0	0	0	0	0	0.896983	0	0	0	0	-0.324695	3.53623	-0.324695	-0.324695	-0.324695	-0.324695	-0.324695	-0.324695	-0.324695	-0.324695	-0.324695	1.00951	-0.324695	-0.324695	-0.324695	-0.324695
ADIPOR1	2083.8	0.00712789	0.0403998	0.177692	0.858965	0.999738	1663.67	2538.59	2490.55	2370.85	1608.43	1749.41	1750.51	2075.55	2052.52	1977.85	2103.43	2416.47	1776.91	2069.41	2363.44	2333.2	-1.35682	1.46875	1.31362	0.927024	-1.53524	-1.07991	-1.07636	-0.0266274	-0.101013	-0.34217	0.06338	1.07437	-0.991114	-0.046477	0.903122	0.805452
ADIPOR2	1785.01	-0.00758316	0.0996007	-0.0764777	0.939039	0.999738	1980.33	1282.27	1961.87	2057.96	1900.7	2015.34	1580.08	1299.65	1813.77	1908.91	1787.69	1807.42	1659.01	1954.31	1824.47	1726.4	0.842141	-2.16759	0.762531	1.17684	0.4988	0.993065	-0.883587	-2.09268	0.123985	0.534203	0.0115608	0.0966209	-0.543279	0.729931	0.17014	-0.252688
ADIRF	1153.48	-0.0250259	0.113877	-0.272258	0.785424	0.999738	1054.34	536.011	403.188	234.959	1023.88	971.897	1467.31	2858.82	2003.01	1795.62	1750.42	374.939	1442.69	1738.64	360.431	439.549	-0.131585	-0.819522	-0.995808	-1.21908	-0.172012	-0.241003	0.416515	2.26337	1.12752	0.852257	0.792269	-1.0333	0.383851	0.776641	-1.05256	-0.947549
ADK	609.431	0.0212816	0.0742546	0.288286	0.773128	0.999738	652.514	569.755	649.506	762.732	621.312	668.179	639.463	498.989	501.165	486.313	589.076	676.325	593.231	569.451	655.025	617.856	0.586258	-0.539894	0.545323	2.08606	0.161673	0.799423	0.408666	-1.50284	-1.47323	-1.67533	-0.276979	0.910267	-0.220434	-0.544028	0.620419	0.114649
ADM2	42.6556	0.0641405	0.113978	0.611111	0.541126	0.999738	26.3884	92.1471	72.0931	62.5771	38.6022	26.9971	15.3779	34.1132	17.0539	24.0484	32.158	66.3767	41.7769	10.9044	56.9101	64.9647	-0.685762	2.08638	1.24098	0.839816	-0.170875	-0.660101	-1.14993	-0.360114	-1.07927	-0.784407	-0.442539	0.999993	-0.037044	-1.33851	0.600918	0.94047
ADM5	43.9128	-0.129603	0.115128	-1.15216	0.249257	0.999738	50.3779	36.3397	30.7063	14.1684	55.146	53.9943	57.667	48.8287	36.8585	50.7689	47.5061	32.2914	68.6997	31.5015	43.5195	44.2313	0.489847	-0.573801	-1.00063	-2.25368	0.851116	0.763851	1.04213	0.372466	-0.534495	0.519471	0.272256	-0.880534	1.87805	-0.940379	-0.0298012	0.0241305
ADNP	2610.18	-0.0146232	0.115401	-0.126905	0.899015	0.999738	3073.05	1325.1	2628.06	3228.03	3012.81	3004.78	1604.42	1694.96	2638.41	2982.01	3041.85	2918.78	2120.41	2902.99	3172.46	2414.75	0.763347	-2.11929	0.0294895	1.01893	0.663998	0.650757	-1.65864	-1.50934	0.0465496	0.613195	0.711894	0.50893	-0.807708	0.482883	0.927285	-0.322288
ADNP-AS1	21.3259	0.129302	0.091594	1.48425	0.137742	0.999738	11.9947	19.4677	8.67788	43.6859	36.764	13.4986	17.9408	14.0466	11.5527	21.3764	43.1209	42.1582	19.4959	15.7508	13.3906	8.29337	-0.739812	-0.147328	-1.00279	1.77278	1.22399	-0.620583	-0.268383	-0.577132	-0.774863	0.00399898	1.72799	1.65166	-0.145095	-0.442021	-0.629142	-1.03327
ADNP2	1289.9	0.00921344	0.0639116	0.142821	0.886432	0.999738	1619.29	1113.55	1259.63	1081.52	1444.83	1444.35	1353.25	1157.17	1244.94	1305.56	1299.48	1265.64	1460.33	1216.44	1272.11	1100.25	2.23062	-1.19418	-0.204981	-1.4111	1.04916	1.04592	0.429039	-0.898786	-0.304467	0.106087	0.0648644	-0.164245	1.15418	-0.497414	-0.120457	-1.28424
ADO	897.719	0.0238107	0.110977	0.221632	0.8246	0.999738	822.84	1392.59	920.523	801.695	674.62	791.016	1171.28	1098.98	752.023	704.352	740.365	878.146	935.802	679.706	980.863	1018.7	-0.377226	2.49304	0.114879	-0.483745	-1.12392	-0.537544	1.37814	1.01391	-0.733983	-0.974139	-0.792715	-0.0986032	0.191852	-1.0983	0.41886	0.609487
ADORA1	3.94614	-0.0353463	0.0726038	-0.52801	0.597492	0.999738	5.99737	2.59569	2.00259	2.3614	1.8382	8.09914	10.2519	4.01332	1.10025	5.87851	1.46173	0.896983	7.427	3.63479	5.57943	0	0.692693	-0.456043	-0.656333	-0.535163	-0.711846	1.40245	2.12944	0.0226847	-0.961048	0.652552	-0.83898	-1.02969	1.17547	-0.105142	0.551553	-1.3326
ADORA2A	166.66	-0.0119733	0.038318	-0.16254	0.87088	0.999738	0	613.882	392.507	224.333	12.8674	0	53.8225	68.2264	8.2519	0	20.4642	447.594	67.7713	0	419.573	337.264	-0.806992	2.16552	1.09359	0.279263	-0.744686	-0.806992	-0.546375	-0.476629	-0.767035	-0.806992	-0.707901	1.36033	-0.478833	-0.806992	1.22464	0.826091
ADORA2A-AS1	29.0143	0.0765697	0.106918	0.771325	0.440514	0.999738	22.79	48.0203	36.0466	34.2403	45.955	25.6473	26.9113	32.1066	19.8046	13.8946	21.9259	29.6004	55.7025	8.48118	27.8971	15.2045	-0.484177	1.47846	0.547036	0.406528	1.3178	-0.261913	-0.163589	0.240546	-0.716413	-1.17614	-0.551396	0.0455976	2.07605	-1.59725	-0.0869008	-1.07425
ADORA2B	345.185	0.109791	0.114856	1.02473	0.305489	0.999738	49.1785	1046.06	666.862	576.182	34.9258	51.2946	92.2672	286.283	217.85	187.578	233.876	552.541	52.9174	164.777	642.75	667.616	-0.971456	2.30019	1.0557	0.7581	-1.01823	-0.964511	-0.830044	-0.193308	-0.417897	-0.517247	-0.365301	0.680516	-0.959185	-0.592075	0.976568	1.05818
ADORA3	0.659565	0.00510378	0.0268688	0.163512	0.870115	0.999738	0	0	0	2.3614	0	0	0	0	1.10025	3.20646	1.46173	0	0	2.4232	0	0	-0.600162	-0.600162	-0.600162	1.54856	-0.600162	-0.600162	-0.600162	-0.600162	0.400999	2.31751	0.729917	-0.600162	-0.600162	1.60479	-0.600162	-0.600162
ADPGK	1566.28	-0.0369423	0.0568108	-0.649579	0.515964	0.999738	1507.74	1752.09	1633.44	1388.5	1457.69	1476.74	1545.48	1555.83	1516.7	1569.56	1521.66	1672.87	1416.7	1635.66	1749.71	1660.06	-0.534569	1.69688	0.613369	-1.62344	-0.991593	-0.817623	-0.189957	-0.0954026	-0.452752	0.0299871	-0.407466	0.973439	-1.36595	0.633578	1.6751	0.856399
ADPGK-AS1	48.8539	0.27355	0.11539	2.37519	0.0175401	0.999738	38.3832	44.1268	42.0543	46.0473	88.2336	36.4461	64.0745	71.5709	56.663	54.5098	54.8148	46.6431	56.6309	31.5015	22.3177	27.6446	-0.619324	-0.2796	-0.402182	-0.166004	2.32925	-0.733897	0.900272	1.34367	0.461899	0.334537	0.352576	-0.130763	0.459995	-1.02636	-1.56957	-1.2545
ADPRH	137.267	-0.0792485	0.0952323	-0.831453	0.405718	0.999738	116.349	138.87	166.882	167.659	60.6606	102.589	85.8598	139.128	149.634	156.582	149.096	161.457	107.691	142.969	157.34	193.512	-0.609254	0.0466625	0.862537	0.885172	-2.23119	-1.01001	-1.49726	0.0542	0.36019	0.56254	0.344513	0.704522	-0.861407	0.166044	0.58461	1.63813
ADPRHL1	28.8973	0.116828	0.114745	1.02426	0.305713	0.999738	22.79	29.8505	32.7089	46.0473	23.8966	31.0467	37.1632	33.4443	18.7043	34.2022	25.5802	25.1155	31.5647	20.5972	17.8542	31.7913	-0.821439	0.1282	0.512665	2.30669	-0.6726	0.289096	1.11177	0.611577	-1.37097	0.713513	-0.446153	-0.508656	0.35877	-1.11638	-1.48532	0.389238
ADPRHL2	999.932	-0.00463022	0.115341	-0.0397023	0.96833	0.999738	967.976	1493.82	810.38	624.59	955.864	1013.74	1827.4	1165.87	783.38	753.517	736.71	854.825	1263.52	753.614	912.794	1080.9	-0.101789	1.57319	-0.603779	-1.19558	-0.140368	0.0439919	2.63575	0.528561	-0.689783	-0.784904	-0.83844	-0.46221	0.839601	-0.784598	-0.277561	0.257917
ADPRM	61.2378	-0.00449234	0.114801	-0.0347991	0.97224	0.999738	58.7743	50.616	85.4437	62.5771	49.6314	66.143	35.8817	41.471	68.7658	67.3356	69.432	71.7586	43.6336	83.6002	68.069	56.6714	-0.172814	-0.745106	1.69802	0.0939523	-0.814175	0.344097	-1.7787	-1.38662	0.528084	0.427756	0.574819	0.738027	-1.23492	1.5687	0.479203	-0.320329
ADRA1B	4.35299	0.041636	0.0746828	0.696211	0.486297	0.999738	1.19947	11.6806	7.34282	1.1807	1.8382	5.39943	5.12596	6.01998	2.20051	3.20646	2.19259	5.3819	0	2.4232	8.92708	5.52891	-0.996935	2.31652	0.945189	-1.00287	-0.795012	0.330816	0.244362	0.526993	-0.680475	-0.362458	-0.682977	0.325274	-1.37613	-0.610075	1.44603	0.371751
ADRA1D	21.5126	0.126544	0.107328	1.16108	0.245609	0.999738	25.189	15.5742	8.67788	7.0842	23.8966	24.2974	55.104	36.1199	26.4061	20.842	24.8494	10.7638	39.9201	15.7508	5.57943	4.14669	0.266459	-0.430409	-0.930242	-1.04575	0.172791	0.201842	2.43466	1.05872	0.354673	-0.048605	0.241845	-0.779058	1.33415	-0.417608	-1.15481	-1.25866
ADRA2A	3.72927	-0.127949	0.0696227	-1.50783	0.131599	0.999738	5.99737	6.48923	4.00517	0	1.8382	4.04957	1.28149	0.668887	1.10025	2.67205	2.19259	2.69095	13.9256	0	4.46354	8.29337	0.626663	0.762562	0.0762311	-1.03037	-0.522491	0.0884977	-0.676307	-0.845565	-0.726381	-0.292104	-0.424575	-0.286882	2.81719	-1.03037	0.202875	1.26103
ADRA2B	2.51632	0.0704432	0.0660892	1.03129	0.302405	0.999738	1.19947	1.29785	2.00259	2.3614	1.8382	0	2.56298	8.02664	2.75063	4.80969	5.84691	1.79397	0	2.4232	3.34766	0	-0.605459	-0.560229	-0.236205	-0.0712302	-0.311786	-1.15695	0.0214511	2.53353	0.107731	1.05444	1.53133	-0.332124	-1.15695	-0.0428182	0.382229	-1.15695
ADRA2C	1.93337	-0.0270643	0.0489095	-0.550218	0.58217	0.999738	1.19947	0	2.67012	0	0	0	1.28149	8.02664	3.85089	2.67205	1.46173	0	3.7135	6.05799	0	0	-0.30057	-0.791823	0.301741	-0.791823	-0.791823	-0.791823	-0.266981	2.49554	0.785332	0.302532	-0.193163	-0.791823	0.729064	1.68927	-0.791823	-0.791823
ADRBK1	2701.69	-0.0786986	0.0991437	-0.796135	0.425954	0.999738	2552.48	3129.11	2476.53	1921	2308.78	2495.89	3495.9	3308.98	2770.99	2718.01	2484.94	2314.22	2918.81	2877.54	2677.01	2776.9	-0.377138	1.08032	-0.569103	-1.97325	-0.993108	-0.520188	2.00741	1.53496	0.175147	0.041236	-0.547865	-0.979369	0.548777	0.444476	-0.0623907	0.190085
ADRBK2	96.0509	0.0572305	0.108189	0.528571	0.597103	0.999738	158.331	73.9773	96.7917	119.251	147.056	133.636	114.053	52.842	62.1643	65.198	65.0468	92.3892	128.116	82.3886	79.2278	66.347	1.87412	-0.664237	0.0222928	0.698126	1.53484	1.131	0.541704	-1.30024	-1.01971	-0.928423	-0.932971	-0.110186	0.964891	-0.411123	-0.506238	-0.893847
ADRM1	3714.78	-0.0409568	0.107136	-0.378831	0.704814	0.999738	3874.3	5214.75	3748.18	2648.31	3575.3	3914.59	5122.11	3863.49	2959.13	2915.2	2609.18	3504.51	4703.15	2939.34	3743.79	4101.07	0.198573	1.8671	0.0415758	-1.32749	-0.173612	0.248716	1.75179	0.185112	-0.940594	-0.995272	-1.37619	-0.261727	1.23028	-0.965234	0.0361218	0.480847
ADSL	908.987	-0.0568305	0.0722747	-0.787833	0.430795	0.999738	1150.3	983.768	766.323	693.071	998.143	1038.04	1052.1	900.321	811.437	831.007	835.377	794.727	1157.68	848.118	834.682	848.688	1.75145	0.54277	-1.03546	-1.56714	0.647107	0.936683	1.03875	-0.0628931	-0.708027	-0.565984	-0.534265	-0.829308	1.80506	-0.441787	-0.539309	-0.43765
ADSS	1659.17	0.00176171	0.103658	0.0176431	0.985924	0.999738	1793.21	1166.76	1729.57	2202.01	1959.52	1766.96	1323.78	1303.66	1580.51	1764.09	1566.97	1740.15	1596.8	1714.41	1620.27	1718.11	0.534046	-1.96187	0.280464	2.16276	1.19665	0.429455	-1.33629	-1.41644	-0.3134	0.417992	-0.367355	0.322613	-0.248494	0.220075	-0.155021	0.234815
ADSSL1	49.3631	0.00531093	0.11514	0.014308	0.988584	0.999738	46.7795	49.3182	26.0336	35.421	29.4112	33.7464	44.8521	99.6641	96.2721	68.9388	57.0074	23.3216	58.4876	64.2147	24.5495	31.7913	-0.108618	-0.00188725	-0.980817	-0.586153	-0.838817	-0.656556	-0.189649	2.11476	1.97215	0.823006	0.321381	-1.09484	0.383614	0.624392	-1.04321	-0.738755
ADTRP	58.2259	0.11147	0.115021	0.983447	0.325387	0.999738	41.9816	70.0837	86.1113	114.528	45.955	29.6969	52.5411	56.1865	52.262	40.0807	46.0444	73.5526	25.9945	65.4263	75.8802	55.2891	-0.725881	0.529874	1.24607	2.51588	-0.548327	-1.27483	-0.254028	-0.0911309	-0.266497	-0.810823	-0.544334	0.684882	-1.44027	0.321753	0.788891	-0.131228
AEBP1	15869	0.0083027	0.0887471	0.107407	0.914466	0.999738	8339.95	26184.1	21025.2	17723.5	7442.88	8435.26	10864.5	17552.9	16267.8	15249.9	15158.8	21136.5	8041.58	16130	22020.9	22329.9	-1.28248	1.75705	0.878296	0.315895	-1.43529	-1.26625	-0.852459	0.286841	0.0679339	-0.10545	-0.120963	0.897262	-1.3333	0.0444626	1.0479	1.10054
AEBP2	442.853	0.0375271	0.114845	0.328391	0.742616	0.999738	478.59	249.187	464.6	610.422	540.431	533.194	324.217	296.317	438.451	510.361	444.365	483.474	347.212	497.967	450.818	416.051	0.370227	-2.00635	0.225292	1.73597	1.01088	0.935905	-1.22905	-1.51809	-0.0456101	0.699366	0.0156593	0.420818	-0.990824	0.570961	0.0825066	-0.27767
AEN	1709.13	-0.0426414	0.0916505	-0.454164	0.649711	0.999738	1556.92	2585.31	2116.73	1800.57	1393.36	1618.48	1992.72	1295.63	1154.17	1094.47	1207.39	2066.65	1998.79	1027.43	2250.74	2186.69	-0.316917	1.82431	0.848683	0.190389	-0.65747	-0.18874	0.590462	-0.86094	-1.15549	-1.27978	-1.04468	0.744398	0.603111	-1.41936	1.1277	0.994329
AES	5932.81	0.0365681	0.113265	0.32058	0.748529	0.999738	4860.27	9230.29	5625.94	4908.17	3521.99	5236.1	6650.93	8408.57	6605.37	5797.81	6123.17	5131.64	6361.22	5515.19	5306.03	5642.26	-0.783701	2.40946	-0.224232	-0.748701	-1.76158	-0.509087	0.524728	1.80903	0.491438	-0.0986443	0.139099	-0.585413	0.313041	-0.305152	-0.457984	-0.212306
AFAP1	6845.8	0.118314	0.0771116	1.56015	0.118725	0.999738	3089.85	12304.9	12411.4	11361.9	2939.28	2875.2	3320.34	4072.18	4155.66	4134.19	5408.39	12944.4	2758.2	3485.77	12574.9	11696.4	-0.862243	1.25322	1.27767	1.03674	-0.896807	-0.911519	-0.809329	-0.636731	-0.617568	-0.622496	-0.329982	1.40002	-0.938377	-0.771353	1.31521	1.11354
AFAP1-AS1	130.707	-0.0588312	0.114995	-0.482836	0.629212	0.999738	71.9685	136.274	150.194	242.044	147.056	76.9419	92.2672	109.697	70.9663	70.0077	98.6666	224.246	122.545	77.5422	219.829	181.072	-1.00018	0.0947843	0.331809	1.89577	0.278377	-0.915491	-0.654539	-0.357747	-1.01724	-1.03356	-0.545574	1.59272	-0.138977	-0.905268	1.51752	0.857582
AFAP1L1	138.579	-0.0197309	0.100319	-0.199498	0.841873	0.999738	167.926	132.38	110.81	86.1911	161.762	190.33	183.253	150.499	138.632	119.173	118.4	112.123	205.171	98.1394	124.979	117.489	0.848329	-0.179168	-0.802687	-1.51432	0.67013	1.49592	1.29136	0.344584	0.00153872	-0.560931	-0.583289	-0.764733	1.92492	-1.16894	-0.393109	-0.609606
AFAP1L2	1.21176	0.0237017	0.0368985	0.761404	0.446416	0.999738	0	2.59569	2.00259	5.9035	0	0	3.84447	1.33777	0.550127	0	0.730863	0	0	2.4232	0	0	-0.696648	0.795628	0.454649	2.6973	-0.696648	-0.696648	1.51355	0.0724439	-0.380378	-0.696648	-0.276471	-0.696648	-0.696648	0.696458	-0.696648	-0.696648
AFF1	1841.5	-0.0160611	0.107852	-0.138413	0.889914	0.999738	1680.46	1626.2	2307.65	2487.74	1623.13	1546.94	994.436	1305	1659.73	1947.39	2085.88	2383.28	1396.28	1753.18	2604.48	2062.29	-0.355307	-0.475026	1.02847	1.4258	-0.481801	-0.649913	-1.86891	-1.18371	-0.401049	0.233617	0.539185	1.19535	-0.98232	-0.194867	1.68337	0.487117
AFF2	63.862	-0.277705	0.113964	-2.42285	0.0153993	0.999738	8.39632	73.9773	82.7736	89.7332	18.382	14.8484	3.84447	48.8287	67.6656	74.8173	77.4715	105.844	14.854	89.6582	148.413	102.285	-1.32515	0.241667	0.451823	0.618097	-1.08658	-1.171	-1.4339	-0.359165	0.0908717	0.261737	0.325149	1.003	-1.17087	0.616305	2.02003	0.917973
AFF3	36.1334	-0.0975545	0.108501	-0.838427	0.401791	0.999738	34.7848	16.872	56.0724	43.6859	36.764	43.1954	19.2223	12.04	20.9048	25.1172	28.5037	47.5401	25.9945	15.7508	82.5755	69.1114	-0.0671629	-0.959207	0.992951	0.376109	0.031403	0.351683	-0.842162	-1.19984	-0.758376	-0.548599	-0.379957	0.568045	-0.504913	-1.01504	2.31279	1.64229
AFF4	4933.62	0.0701067	0.105816	0.667763	0.504285	0.999738	5158.94	4003.86	5204.72	6735.89	5345.49	4762.3	3427.98	3712.32	4746.49	5313.63	5539.95	5894.07	3988.3	4810.04	5696.59	4597.29	0.259971	-1.07273	0.312796	2.07942	0.475206	-0.197666	-1.73716	-1.4091	-0.2159	0.438453	0.699565	1.10815	-1.09068	-0.142577	0.880301	-0.388042
AFG3L1P	246.614	-0.0315268	0.0949517	-0.338936	0.734658	0.999738	286.674	221.932	166.882	138.142	362.126	284.82	340.876	260.197	235.454	234.071	230.222	226.04	314.719	253.224	194.164	196.276	0.660677	-0.407052	-1.31492	-1.78891	1.90501	0.630092	1.55457	0.224012	-0.184042	-0.206847	-0.270331	-0.339305	1.12319	0.109015	-0.864995	-0.830157
AFG3L2	1560.09	0.0534583	0.0683894	0.782716	0.433794	0.999738	1620.49	1804.01	1592.72	1564.43	1718.72	1529.39	1974.77	1448.14	1323.6	1366.49	1294.36	1629.82	1495.61	1403.03	1516.49	1679.41	0.334625	1.35137	0.180794	0.0240202	0.878838	-0.17011	2.29748	-0.620254	-1.31022	-1.07264	-1.47225	0.386303	-0.357243	-0.870175	-0.241582	0.661048
AFMID	162.096	0.00955539	0.105286	0.0863907	0.931156	0.999738	122.346	190.783	157.537	102.721	148.894	149.834	199.912	200.666	195.295	166.736	180.523	146.208	165.251	193.856	136.138	136.841	-1.33807	0.965672	-0.153482	-1.99871	-0.444411	-0.412773	1.27297	1.29834	1.11754	0.156174	0.620291	-0.53483	0.106182	1.06909	-0.873816	-0.850163
AFP	6.23815	-0.0421331	0.0824766	-0.513599	0.607532	0.999738	9.5958	3.89354	3.33765	0	7.3528	4.04957	3.84447	10.7022	6.05139	11.757	8.77036	1.79397	1.85675	21.8088	2.23177	2.76446	0.6184	-0.431824	-0.534207	-1.14892	0.205293	-0.403087	-0.440862	0.822172	-0.0343974	1.01645	0.466374	-0.818517	-0.806954	2.86775	-0.737884	-0.639775
AFTPH	449.795	0.0523267	0.114975	0.472577	0.636515	0.999738	439.008	293.313	545.371	583.266	531.24	402.257	272.957	286.952	474.209	488.985	469.214	624.3	285.939	433.752	578.028	487.927	-0.0943214	-1.36823	0.835693	1.16703	0.712134	-0.415655	-1.54622	-1.42385	0.21347	0.342665	0.169798	1.52582	-1.43271	-0.140276	1.12124	0.333413
AGA	557.044	0.029099	0.0874471	0.320463	0.748617	0.999738	678.903	384.163	304.393	324.693	580.871	596.637	779.145	741.126	734.969	773.825	699.436	288.828	557.025	849.33	289.014	330.353	0.595821	-0.8453	-1.23533	-1.13608	0.116501	0.193586	1.08596	0.900062	0.869956	1.05994	0.69622	-1.31143	-9.62787e-05	1.42912	-1.31053	-1.1084
AGAP1	1611.03	-0.017657	0.108758	-0.169508	0.865397	0.999738	1892.77	1715.75	1108.77	1063.81	1724.23	1773.71	2716.76	2071.54	1499.64	1291.13	1384.99	1207.34	2342.29	1417.57	1300.01	1266.12	0.606899	0.225589	-1.08191	-1.17875	0.243853	0.350437	2.38183	0.991985	-0.239926	-0.689077	-0.48691	-0.869577	1.5752	-0.416724	-0.669964	-0.742955
AGAP1-IT1	13.0371	0.0212632	0.100444	0.251147	0.8017	0.999738	19.1916	5.19139	5.34023	12.9877	27.573	14.8484	34.6002	10.7022	5.50127	6.94732	9.50123	6.27888	36.2066	4.84639	3.34766	5.52891	0.569816	-0.726391	-0.71261	-0.00457023	1.34581	0.167705	1.99642	-0.216174	-0.697701	-0.563818	-0.327365	-0.625705	2.14515	-0.758332	-0.897092	-0.695141
AGAP11	59.641	-0.0497502	0.115366	-0.471372	0.637375	0.999738	28.7874	22.0634	16.0207	27.1561	49.6314	21.5977	42.2891	107.022	166.688	114.364	108.899	26.0125	35.2782	139.334	20.0859	29.0268	-0.622298	-0.757917	-0.879795	-0.6552	-0.201887	-0.76731	-0.349976	0.955644	2.15908	1.10372	0.993498	-0.678266	-0.491382	1.60735	-0.797801	-0.617469
AGAP2	16.353	0.0677618	0.110716	0.596925	0.550558	0.999738	16.7926	12.9785	15.3532	16.5298	22.0584	16.1983	21.7853	28.7621	18.1542	17.6355	10.963	8.07285	18.5675	16.9624	11.1589	9.6756	0.0842946	-0.647015	-0.191702	0.0338987	1.09392	-0.0296642	1.04156	2.37926	0.345347	0.245902	-1.03346	-1.58759	0.424595	0.116836	-0.995898	-1.28029
AGAP2-AS1	627.364	-0.07858	0.109465	-0.718263	0.472595	0.999738	627.325	768.325	665.527	383.728	446.683	634.433	776.582	706.344	631.545	594.798	567.15	568.687	752.912	550.065	703.008	660.705	-0.000351898	1.29182	0.349739	-2.23277	-1.65582	0.0647856	1.36749	0.723806	0.0383224	-0.298444	-0.551818	-0.537732	1.15057	-0.708389	0.693228	0.305555
AGAP3	2634.78	-0.0185176	0.110165	-0.175343	0.86081	0.999738	2454.12	3168.04	2142.77	1623.46	2527.53	2595.78	3866.25	3575.2	2856.81	2647.46	2277.37	2032.56	2793.48	2858.16	2267.48	2470.04	-0.32027	0.945367	-0.872243	-1.79287	-0.190144	-0.0691517	2.18315	1.66717	0.393606	0.0224837	-0.63362	-1.06761	0.281338	0.396002	-0.651157	-0.292051
AGAP4	160.949	0.0412154	0.104733	0.387538	0.698358	0.999738	179.921	162.231	139.514	97.9981	249.995	179.531	144.808	154.513	163.938	174.752	176.138	148.899	158.752	180.528	146.181	117.489	0.573229	0.038722	-0.647672	-1.90205	2.69049	0.56144	-0.487694	-0.194476	0.0902941	0.417042	0.458925	-0.36409	-0.0663881	0.591565	-0.44622	-1.31312
AGAP5	107.399	0.0323049	0.114078	0.277268	0.781575	0.999738	111.551	53.2117	95.4567	128.696	128.674	109.338	65.356	119.062	119.928	117.036	138.864	121.99	110.477	118.737	97.082	82.9337	0.177506	-2.31683	-0.510623	0.910558	0.909607	0.0829004	-1.7976	0.498629	0.535646	0.412002	1.34529	0.623812	0.131563	0.484723	-0.441131	-1.04605
AGAP6	208.488	0.0159411	0.0865241	0.187052	0.85162	0.999738	165.527	250.484	208.937	263.296	194.849	186.28	202.475	207.355	186.493	191.853	184.178	253.846	222.81	179.316	237.684	200.423	-1.47571	1.44259	0.0154119	1.88268	-0.468492	-0.76284	-0.206536	-0.0389227	-0.755537	-0.571415	-0.835069	1.55807	0.491965	-1.00205	1.00288	-0.277028
AGAP7P	28.9904	0.108255	0.0948334	1.23317	0.217512	0.999738	31.1863	25.9569	9.34541	18.8912	22.0584	35.0963	29.4743	46.1532	36.8585	55.5786	36.5432	20.6306	43.6336	49.6755	0	2.76446	0.135349	-0.186971	-1.21084	-0.622477	-0.427262	0.376344	0.0298227	1.05785	0.484958	1.6388	0.465524	-0.515266	0.902552	1.27495	-1.78686	-1.61647
AGAP9	212.687	0.0183783	0.113321	0.18414	0.853903	0.999738	161.929	329.653	260.336	348.307	220.584	122.837	137.119	94.313	154.035	134.137	182.716	354.308	203.314	116.313	342.577	240.508	-0.561977	1.29503	0.527567	1.50155	0.0874387	-0.994795	-0.836664	-1.31061	-0.649373	-0.869687	-0.33183	1.568	-0.103772	-1.06702	1.43811	0.308029
AGBL2	8.4128	-0.0544561	0.0915647	-0.56552	0.57172	0.999738	5.99737	3.89354	8.67788	3.5421	9.191	17.5481	2.56298	9.36441	10.4524	9.08496	8.0395	8.07285	21.3526	8.48118	5.57943	2.76446	-0.478965	-0.896143	0.0525632	-0.965831	0.154313	1.81148	-1.15999	0.188699	0.404441	0.133286	-0.0740238	-0.0674112	2.56589	0.0135597	-0.561842	-1.12003
AGBL3	4.01196	-0.00598742	0.0781803	-0.0472505	0.962314	0.999738	5.99737	1.29785	2.67012	7.0842	3.6764	8.09914	1.28149	6.01998	3.30076	3.20646	1.46173	3.58793	5.57025	1.2116	5.57943	4.14669	0.909781	-1.2437	-0.614877	1.4078	-0.153764	1.87288	-1.25119	0.92014	-0.325896	-0.369108	-1.1686	-0.194304	0.714058	-1.28322	0.718263	0.0617353
AGBL5	668.643	-0.0344537	0.0871853	-0.399148	0.689785	0.999738	663.309	526.926	632.818	504.159	597.415	645.232	508.751	682.264	866.999	871.622	887.268	638.652	559.81	843.272	679.574	590.212	-0.0406915	-1.08126	-0.273336	-1.25496	-0.543445	-0.178619	-1.21993	0.103929	1.51341	1.54867	1.66805	-0.228822	-0.830364	1.33237	0.0834027	-0.598407
AGBL5-AS1	3.14817	-0.0172153	0.0601475	-0.332824	0.739267	0.999738	0	5.19139	1.33506	4.7228	3.6764	0	2.56298	8.69553	0.550127	2.67205	2.92345	4.48491	6.49862	1.2116	4.46354	1.38223	-1.28669	0.835085	-0.741036	0.643569	0.215895	-1.28669	-0.239173	2.26726	-1.06185	-0.194595	-0.0918428	0.546342	1.36937	-0.791496	0.537606	-0.721757
AGER	73.9934	0.0313556	0.115293	0.267581	0.789022	0.999738	81.5643	96.0407	56.0724	54.3122	86.3954	87.7407	133.275	56.1865	61.064	88.712	63.5851	39.4672	115.118	63.0031	50.2148	51.1425	0.293073	0.853464	-0.693731	-0.761871	0.480091	0.532167	2.29482	-0.689317	-0.500503	0.569766	-0.402911	-1.33653	1.59198	-0.425442	-0.920483	-0.884574
AGFG1	1617.24	0.0268669	0.0990802	0.279452	0.779898	0.999738	1609.69	1604.14	1909.8	2157.14	1431.96	1326.91	1016.22	1213.36	1471.59	1500.09	1810.35	2184.15	1256.09	1469.67	2159.24	1755.43	-0.0213163	-0.037015	0.826617	1.52546	-0.5235	-0.82031	-1.69814	-1.14114	-0.411528	-0.331005	0.545621	1.60178	-1.0204	-0.416955	1.53139	0.390452
AGFG2	452.451	-0.0787842	0.108297	-0.730543	0.465058	0.999738	374.236	524.33	385.164	308.163	371.317	429.255	599.737	612.031	463.207	469.746	457.521	365.072	545.884	511.294	348.156	474.104	-0.865413	0.795309	-0.744497	-1.59648	-0.897716	-0.256658	1.62965	1.76568	0.119005	0.191361	0.0560917	-0.966809	1.0338	0.651073	-1.15398	0.239585
AGGF1	664.966	0.0214447	0.0734656	0.29325	0.769331	0.999738	674.105	799.474	639.493	807.599	597.415	602.036	615.115	652.164	617.242	687.785	610.271	672.737	602.515	682.129	631.591	747.786	0.135372	1.99248	-0.377339	2.11284	-1.00064	-0.932189	-0.738455	-0.189634	-0.706945	0.338022	-0.810207	0.115114	-0.925096	0.254244	-0.494391	1.22682
AGK	400.262	0.019497	0.114946	0.171027	0.864202	0.999738	479.79	220.634	453.252	478.184	501.829	464.351	271.676	252.17	416.446	382.103	417.323	489.753	360.209	397.404	454.165	364.908	0.908195	-2.05133	0.605139	0.889851	1.15988	0.731884	-1.46844	-1.69119	0.184814	-0.207379	0.194832	1.02197	-0.4574	-0.032641	0.615565	-0.403737
AGL	409.448	-0.0134521	0.115222	-0.101807	0.91891	0.999738	381.433	267.356	467.938	608.061	397.051	338.814	212.727	276.25	410.394	475.624	450.943	528.323	244.163	512.506	534.509	445.078	-0.242311	-1.22899	0.505892	1.71785	-0.107222	-0.61093	-1.70149	-1.15206	0.00818438	0.572375	0.358897	1.02818	-1.4296	0.891371	1.08168	0.308168
AGMAT	106.785	0.0511682	0.115403	0.44222	0.65833	0.999738	100.756	199.868	99.4618	83.8297	126.836	128.236	142.245	93.6441	50.0615	80.6958	78.9333	121.99	125.331	98.1394	85.9231	92.6093	-0.176346	2.72258	-0.214195	-0.671416	0.586464	0.627429	1.03717	-0.384356	-1.6591	-0.763078	-0.814632	0.444718	0.542436	-0.252874	-0.610185	-0.414623
AGMO	0.240279	0.00182087	0.0149914	0.0347569	0.972274	0.999738	0	0	0	0	0	0	3.84447	0	0	0	0	0	0	0	0	0	-0.25	-0.25	-0.25	-0.25	-0.25	-0.25	3.75	-0.25	-0.25	-0.25	-0.25	-0.25	-0.25	-0.25	-0.25	-0.25
AGO1	2559.65	-0.0671789	0.0941222	-0.714323	0.475028	0.999738	2617.25	2101.21	2692.81	2386.19	2612.08	2682.17	2355.38	1963.18	2567.99	2771.98	2760.47	2719.65	2151.97	2970.84	3160.19	2441.02	0.182303	-1.45084	0.42143	-0.548944	0.165942	0.387737	-0.646474	-1.88768	0.0263977	0.671984	0.635555	0.506371	-1.2902	1.30131	1.90056	-0.375448
AGO2	1873.22	-0.00224129	0.11233	-0.0298915	0.976154	0.999738	2690.42	1024	1700.86	1351.9	2560.61	2420.29	1587.77	1347.81	2020.06	1993.35	2145.08	1903.4	2376.64	1584.77	1900.35	1364.26	1.68526	-1.75131	-0.355448	-1.07509	1.41757	1.12819	-0.588686	-1.08354	0.302822	0.247725	0.560643	0.0622256	1.03817	-0.594863	0.0559453	-1.04961
AGO3	453.35	0.120088	0.0945302	1.27552	0.202126	0.999738	416.218	423.098	493.304	585.627	533.078	426.555	342.158	385.948	442.852	437.681	475.792	573.172	329.573	438.598	496.569	453.371	-0.514954	-0.419536	0.554096	1.83446	1.10569	-0.371596	-1.54204	-0.934747	-0.145585	-0.21729	0.311238	1.66172	-1.71656	-0.204574	0.599374	0.000296582
AGO4	426.191	-0.0128936	0.109933	-0.122076	0.902839	0.999738	474.992	254.378	405.858	421.51	545.946	507.546	306.276	339.125	463.207	494.863	477.254	438.625	415.912	449.503	456.397	367.673	0.633219	-2.2294	-0.263845	-0.0607462	1.55389	1.05563	-1.55599	-1.12974	0.480296	0.891063	0.662569	0.161329	-0.133385	0.302479	0.391937	-0.759319
AGPAT1	2811.85	-0.0208271	0.105237	-0.199795	0.841641	0.999738	2712.01	3575.57	2716.84	2056.78	1987.1	2748.31	3267.8	3719.01	2931.07	2774.65	2750.24	2442.48	3121.2	2827.87	2653.57	2705.02	-0.216971	1.65982	-0.20647	-1.641	-1.79245	-0.138085	0.990933	1.97156	0.259123	-0.0808282	-0.13389	-0.802742	0.672319	0.0348241	-0.343974	-0.232163
AGPAT2	1252.93	0.0117117	0.115362	0.101577	0.919092	0.999738	1116.71	1926	1237.6	826.49	968.732	1031.29	1740.26	1878.23	1148.11	1162.88	1016.63	1043.19	1490.97	1029.86	1118.12	1311.73	-0.409583	2.02387	-0.0460863	-1.28224	-0.854539	-0.666431	1.46537	1.88023	-0.315157	-0.270772	-0.710512	-0.630649	0.715771	-0.67074	-0.405355	0.176832
AGPAT3	3973.35	-0.00380691	0.0935295	-0.0388802	0.968986	0.999738	3768.75	5113.52	4085.95	3468.9	3290.38	3749.9	5075.98	4254.12	3665.49	3656.43	3430.67	3909.05	4146.12	3526.96	4257.1	4174.33	-0.383759	2.13851	0.211181	-0.946167	-1.281	-0.419106	2.0681	0.526608	-0.577428	-0.594426	-1.01786	-0.120606	0.324047	-0.837261	0.532203	0.376957
AGPAT4	862.446	-0.0804196	0.0783779	-1.02812	0.303893	0.999738	825.238	621.669	744.962	872.537	950.35	800.465	818.872	838.784	1006.73	959.265	965.471	839.576	870.815	1048.03	863.695	772.666	-0.34828	-2.25381	-1.09971	0.094465	0.822834	-0.58017	-0.407877	-0.221488	1.3506	0.906286	0.964373	-0.214073	0.0783466	1.73719	0.0116957	-0.840389
AGPAT4-IT1	54.1348	0.0257413	0.113376	0.22305	0.823497	0.999738	70.769	36.3397	28.7038	56.6736	123.159	60.7436	41.0077	56.1865	39.059	43.2872	60.6617	44.8491	92.8375	59.3683	29.013	23.4979	0.650782	-0.6962	-0.994943	0.0993259	2.70046	0.258556	-0.513575	0.0802677	-0.589814	-0.424393	0.255352	-0.363284	1.51417	0.20475	-0.982844	-1.19861
AGPAT5	547.087	0.0246897	0.069599	0.35914	0.71949	0.999738	670.506	539.904	647.503	670.638	555.137	606.086	640.745	414.71	374.086	404.014	372.01	642.24	663.788	375.595	566.87	609.563	1.04833	-0.0610112	0.852943	1.04945	0.0683743	0.501141	0.795535	-1.12442	-1.46948	-1.21528	-1.48712	0.808235	0.991266	-1.45667	0.168035	0.530675
AGPS	1700.47	0.0627957	0.0849652	0.745141	0.456186	0.999738	1592.9	1730.03	1928.49	2478.29	1676.44	1610.38	1478.84	1339.11	1445.73	1647.58	1355.75	2112.39	1260.73	1581.13	1946.1	2023.58	-0.330764	0.0908995	0.701164	2.39178	-0.0738898	-0.277022	-0.681507	-1.11117	-0.783307	-0.162617	-1.06	1.26666	-1.35218	-0.366948	0.755321	0.993567
AGRN	19197.2	0.0171549	0.114068	0.161134	0.871988	0.999738	8485.08	39365	21383.6	13569.8	8426.31	9179.03	19820.8	32176.8	21265.7	19319.4	18045	18908.4	12561.8	19143.2	22042.1	23463.3	-1.29955	2.44666	0.265245	-0.682694	-1.30668	-1.21536	0.0756497	1.57462	0.250938	0.0148277	-0.139779	-0.0350379	-0.804973	-0.00654777	0.345125	0.517545
AGRP	0.975224	0.00727943	0.0444351	0.103085	0.917895	0.999738	1.19947	0	0	1.1807	3.6764	0	2.56298	0.668887	0.550127	1.06882	0.730863	0.896983	1.85675	1.2116	0	0	0.218174	-0.948796	-0.948796	0.199908	2.62798	-0.948796	1.54473	-0.298036	-0.413578	0.091059	-0.237738	-0.0761207	0.857637	0.229968	-0.948796	-0.948796
AGT	2.9137	0.0403543	0.0586414	0.780483	0.435107	0.999738	0	1.29785	2.00259	8.2649	0	0	6.40745	6.01998	6.60152	2.67205	3.65432	0.896983	0	2.4232	2.23177	4.14669	-1.08392	-0.60111	-0.338942	1.99068	-1.08392	-1.08392	1.29969	1.15555	1.37189	-0.089898	0.275513	-0.750234	-1.08392	-0.182473	-0.253684	0.458677
AGTPBP1	234.718	0.0197254	0.114618	0.183851	0.85413	0.999738	205.11	173.911	287.705	377.824	194.849	179.531	125.586	141.804	265.161	288.581	245.57	307.665	158.752	252.012	295.71	255.712	-0.425766	-0.874411	0.761971	2.05791	-0.573319	-0.7936	-1.56934	-1.33613	0.437781	0.77457	0.15606	1.049	-1.09241	0.2487	0.877077	0.301907
AGTR1	57.1451	0.100592	0.112388	0.878908	0.379451	0.999738	68.37	28.5526	47.3946	51.9508	60.6606	68.8427	58.9485	57.5242	76.4676	75.3517	70.8938	47.5401	67.7713	76.3306	24.5495	33.1735	0.661249	-1.68436	-0.574398	-0.305994	0.207094	0.689094	0.106235	0.0223325	1.13827	1.07254	0.809919	-0.565825	0.625981	1.1302	-1.92018	-1.41215
AGTRAP	1075.59	-0.0158433	0.0958916	-0.169617	0.865312	0.999738	939.189	1216.08	1058.03	680.083	777.559	967.848	1018.78	1395.3	1328.01	1340.3	1295.82	948.111	1026.78	1197.06	974.168	1046.35	-0.666764	0.686745	-0.0858273	-1.93332	-1.45684	-0.526673	-0.277687	1.56278	1.23384	1.29394	1.07652	-0.62315	-0.238589	0.593752	-0.49578	-0.142953
AGXT	0.34309	4.69996e-05	0.0156653	0.0489477	0.960961	0.999738	0	3.89354	0.667529	0	0	0	0	0	0	0	0	0	0.928375	0	0	0	-0.347952	3.60076	0.329036	-0.347952	-0.347952	-0.347952	-0.347952	-0.347952	-0.347952	-0.347952	-0.347952	-0.347952	0.593578	-0.347952	-0.347952	-0.347952
AHCTF1	1666.45	-0.0462831	0.115319	-0.405608	0.68503	0.999738	2346.17	767.027	1566.02	2022.54	2402.53	2043.68	1150.78	924.401	1419.88	1515.05	1664.18	1939.28	1727.71	1672	1953.91	1548.1	1.47925	-1.95739	-0.218563	0.774939	1.6019	0.820955	-1.12225	-1.61491	-0.536618	-0.329492	-0.00495598	0.593738	0.133301	0.0120811	0.625594	-0.257578
AHCTF1P1	20.5908	-0.183162	0.112372	-1.59099	0.111611	0.999738	15.5932	14.2763	23.3635	33.0596	16.5438	12.1487	3.84447	12.7088	21.4549	17.6355	24.8494	25.1155	12.0689	35.1363	31.2448	30.409	-0.558657	-0.70586	0.309947	1.39382	-0.45239	-0.943693	-1.87198	-0.881079	0.0965968	-0.330354	0.47604	0.505793	-0.952618	1.62596	1.19095	1.09752
AHCY	1926.59	-0.043121	0.0838314	-0.510091	0.609988	0.999738	1860.38	2223.21	2351.7	1584.5	1597.4	1841.21	1744.11	1854.15	1726.85	1703.16	1742.38	2401.22	1802.9	1619.91	2393.57	2378.82	-0.214783	0.962265	1.37911	-1.10978	-1.06794	-0.277004	-0.592001	-0.234998	-0.647994	-0.724827	-0.597608	1.53975	-0.401259	-0.994922	1.51494	1.46706
AHCYL1	3997.48	0.015803	0.0770413	0.205976	0.836809	0.999738	3964.26	3748.18	4095.29	4764.12	4044.04	3828.19	3914.95	3591.92	3909.75	4294.52	3977.36	3880.35	3255.81	4705.85	3879.93	4105.22	-0.0898623	-0.674364	0.264568	2.07376	0.125939	-0.457927	-0.223256	-1.09705	-0.237323	0.803469	-0.0544384	-0.316854	-2.00623	1.91612	-0.317978	0.291423
AHCYL2	303.031	-0.105084	0.0782222	-1.3448	0.17869	0.999738	182.32	376.376	346.448	311.705	205.879	209.228	217.853	376.583	358.132	320.646	343.506	293.313	251.59	357.421	338.113	359.379	-1.7941	1.09011	0.645297	0.128921	-1.44395	-1.39417	-1.26598	1.0932	0.818965	0.261808	0.601574	-0.144427	-0.76456	0.808397	0.521424	0.8375
AHDC1	1213.38	-0.0826557	0.104526	-0.786633	0.431496	0.999738	809.645	1827.37	1402.48	1011.86	740.795	915.203	1049.54	1478.91	1254.29	1263.88	1121.88	1284.48	1168.82	1119.52	1486.36	1478.98	-1.42772	2.17128	0.668733	-0.712625	-1.6712	-1.05444	-0.579377	0.939013	0.144683	0.178597	-0.323574	0.251448	-0.157549	-0.331917	0.965361	0.939284
AHI1	671.393	0.0487554	0.115357	0.439527	0.66028	0.999738	610.533	442.566	780.342	1126.39	634.179	506.196	313.965	476.247	767.977	734.279	807.604	870.073	398.273	771.788	819.06	682.821	-0.292954	-1.10147	0.524426	2.19013	-0.179129	-0.795178	-1.72049	-0.93934	0.464907	0.302702	0.655656	0.956353	-1.31467	0.483252	0.710797	0.0550084
AHNAK	77019.6	-0.0131143	0.0908167	-0.148753	0.881749	0.999738	101942	71738.5	49986.6	65231.3	128303	104837	103944	69078.6	55031.9	58098.9	60917.5	62413.9	117886	62290.7	70202.6	50411.3	0.981779	-0.208039	-1.06492	-0.464377	2.02021	1.0958	1.06065	-0.312821	-0.866164	-0.745347	-0.634313	-0.575366	1.60986	-0.580219	-0.268544	-1.04819
AHNAK2	5715.72	-0.0805786	0.076226	-1.06156	0.288438	0.999738	5462.41	5380.87	4553.88	3991.95	5814.23	5475.02	5802.58	7412.6	6473.89	6449.79	6591.66	4892.14	6180.19	6712.25	5823.8	4434.19	-0.273424	-0.361433	-1.25409	-1.86065	0.106336	-0.259809	0.0937651	1.83163	0.818379	0.792365	0.945499	-0.888971	0.501357	1.07567	0.116671	-1.38329
AHR	3299.96	0.0879054	0.11089	0.789203	0.429994	0.999738	2650.84	4450.32	2865.7	2890.35	2385.98	2499.94	4266.08	4961.13	3564.82	3564.51	4031.44	2621.88	3186.18	3305.24	2664.73	2890.24	-0.838543	1.48604	-0.56098	-0.529135	-1.18068	-1.03348	1.24804	2.14591	0.342146	0.341748	0.944934	-0.875951	-0.146982	0.00681612	-0.820594	-0.529282
AHRR	3715.24	-0.0571372	0.0960348	-0.610576	0.54148	0.999738	3605.62	2968.18	2254.91	1805.29	3856.55	3903.79	4518.53	5698.91	5206.4	5028.79	4639.52	1786.79	4576.89	4974.82	2220.61	2398.17	-0.0835706	-0.56956	-1.11335	-1.45615	0.107735	0.143752	0.612435	1.51236	1.13687	1.00146	0.704678	-1.47025	0.656926	0.960311	-1.13951	-1.00414
AHSA1	1266.5	-0.0811425	0.0632541	-1.28173	0.199939	0.999738	1393.79	1227.76	1331.05	1190.15	1270.2	1465.94	1386.57	1024.73	1033.14	1080.04	1000.55	1492.58	1328.5	1138.9	1429.45	1470.69	0.743361	-0.226247	0.376975	-0.445936	0.0215698	1.16476	0.701207	-1.41195	-1.36288	-1.08895	-1.55318	1.3203	0.362089	-0.745205	0.951615	1.19248
AHSA2	821.166	-0.011449	0.113831	-0.103466	0.917593	0.999738	552.958	946.13	644.166	828.851	764.692	568.29	1112.33	1293.63	963.822	822.991	752.789	610.845	761.267	1086.8	626.012	803.075	-1.2635	0.588697	-0.83383	0.0362074	-0.266044	-1.19127	1.37166	2.22572	0.672039	0.00859796	-0.322114	-0.990799	-0.282176	1.25139	-0.919352	-0.0852237
AICDA	0.350903	0.00250367	0.023938	0.17898	0.857953	0.999738	0	0	0.667529	2.3614	0	0	0	0.668887	0	0.53441	0	0	0	0	0	1.38223	-0.525231	-0.525231	0.473924	3.0093	-0.525231	-0.525231	-0.525231	0.475956	-0.525231	0.274671	-0.525231	-0.525231	-0.525231	-0.525231	-0.525231	1.54368
AIDA	2202.03	-0.000515478	0.114656	-0.00378934	0.996977	0.999738	2738.4	1296.55	2361.72	2970.64	2707.67	2452.69	1654.4	1213.36	2002.46	2263.22	2232.79	2503.48	2070.28	2219.65	2372.37	2172.86	1.10996	-1.87382	0.330453	1.59057	1.04637	0.518713	-1.13328	-2.04598	-0.413	0.126629	0.0636429	0.623815	-0.272663	0.0364486	0.352499	-0.0603656
AIF1	0.284901	-0.00511633	0.0149922	-0.235781	0.813603	0.999738	0	0	0	0	0	0	0	0	0	0	0	1.79397	0	0	0	2.76446	-0.356837	-0.356837	-0.356837	-0.356837	-0.356837	-0.356837	-0.356837	-0.356837	-0.356837	-0.356837	-0.356837	1.89009	-0.356837	-0.356837	-0.356837	3.10562
AIF1L	2.68452	0.0135945	0.0651297	0.269394	0.787626	0.999738	7.19685	6.48923	2.00259	5.9035	0	0	1.28149	2.67555	1.10025	2.67205	1.46173	1.79397	2.78512	1.2116	2.23177	4.14669	2.0687	1.74429	-0.312638	1.47576	-1.23074	-1.23074	-0.64323	-0.00411567	-0.726319	-0.00571956	-0.560599	-0.408282	0.0461209	-0.675272	-0.207568	0.670338
AIFM1	712.672	0.0869514	0.0791667	1.09834	0.272054	0.999738	762.866	608.69	704.911	745.022	731.604	843.661	784.271	591.296	704.712	735.348	706.745	786.654	621.083	712.419	646.097	717.377	0.730893	-1.51413	-0.113018	0.471057	0.275675	1.90739	1.04259	-1.76742	-0.115911	0.330187	-0.0863089	1.07728	-1.33368	-0.00368095	-0.969426	0.0685044
AIFM2	1009.49	0.0481807	0.086656	0.547387	0.584113	0.999738	1075.93	807.261	704.911	661.192	1108.44	1187.87	1557.01	1288.94	1149.76	1188.53	1046.6	665.561	1329.43	1101.34	629.359	649.647	0.23155	-0.704757	-1.06145	-1.21381	0.344835	0.621681	1.90812	0.97391	0.488868	0.623955	0.129328	-1.19858	1.11501	0.320117	-1.32474	-1.25404
AIFM3	6.81821	-0.15582	0.0884492	-1.75657	0.0789911	0.999738	3.59842	9.08493	4.00517	2.3614	3.6764	6.74929	1.28149	15.3844	8.2519	9.61937	6.57777	0.896983	10.2121	15.7508	3.34766	8.29337	-0.710853	0.500436	-0.621052	-0.983958	-0.693637	-0.0152178	-1.22238	1.89121	0.316523	0.618428	-0.0530841	-1.30727	0.749293	1.97209	-0.766216	0.325679
AIG1	285.139	0.0731072	0.0942157	0.774084	0.438881	0.999738	251.89	368.588	294.38	277.465	220.584	175.481	267.831	359.861	317.973	325.455	328.158	282.55	225.595	356.21	230.988	279.21	-0.597728	1.5002	0.166139	-0.137961	-1.16052	-1.97134	-0.311141	1.3433	0.590273	0.724784	0.773363	-0.0465456	-1.07043	1.27766	-0.973478	-0.106579
AIM1	313.358	-0.0117529	0.0994775	-0.14722	0.882958	0.999738	527.769	98.6364	113.48	120.431	579.033	579.089	448.521	249.495	315.222	397.066	369.817	125.578	522.675	317.439	136.138	113.343	1.18209	-1.1838	-1.10197	-1.06364	1.46472	1.46503	0.745181	-0.352093	0.010278	0.461499	0.311268	-1.03527	1.154	0.0224957	-0.977051	-1.10273
AIM1L	0.237956	-0.00216066	0.0149914	-0.108014	0.913985	0.999738	0	2.59569	0	0	0	0	0	0	0	0	0	0	0	1.2116	0	0	-0.341108	3.3798	-0.341108	-0.341108	-0.341108	-0.341108	-0.341108	-0.341108	-0.341108	-0.341108	-0.341108	-0.341108	-0.341108	1.39571	-0.341108	-0.341108
AIM2	1.66004	-0.0370381	0.0533239	-0.644702	0.51912	0.999738	5.99737	0	1.33506	0	0	1.34986	1.28149	0.668887	1.10025	1.60323	1.46173	2.69095	3.7135	1.2116	0	4.14669	2.55631	-0.978382	-0.191534	-0.978382	-0.978382	-0.182812	-0.223106	-0.584158	-0.329922	-0.0334817	-0.116879	0.607591	1.21025	-0.264299	-0.978382	1.46556
AIMP1	343.931	-0.0152661	0.100129	-0.154335	0.877345	0.999738	407.821	214.145	335.767	380.185	439.33	373.91	348.565	285.615	321.824	337.747	323.773	356.102	316.576	335.613	363.779	362.144	1.2635	-2.56666	-0.161448	0.716971	1.88662	0.592876	0.0916449	-1.15327	-0.437188	-0.122297	-0.398654	0.240699	-0.540978	-0.164505	0.392507	0.360181
AIMP2	473.334	-0.00576184	0.104345	-0.0534726	0.957355	0.999738	587.743	621.669	439.902	358.933	463.227	491.348	698.412	474.241	386.189	361.261	350.814	434.14	612.727	361.056	434.079	497.602	1.07074	1.38825	-0.312889	-1.07067	-0.0945924	0.168593	2.10648	0.00848608	-0.815583	-1.04888	-1.14665	-0.366815	1.30457	-1.0508	-0.36738	0.227127
AIP	1103.48	0.0511507	0.114646	0.44752	0.654499	0.999738	827.637	1750.8	1064.71	857.188	889.689	912.503	1576.23	1523.72	1101.9	999.88	983.742	949.008	1097.34	1011.68	948.502	1161.07	-1.00754	2.36443	-0.141601	-0.899602	-0.780887	-0.697555	1.72681	1.53502	-0.00574245	-0.378398	-0.437344	-0.564217	-0.0224153	-0.335283	-0.566064	0.21038
AIPL1	0.285093	0.00389435	0.0150934	0.322604	0.746995	0.999738	0	2.59569	0	0	0	0	0	0	0	1.06882	0	0.896983	0	0	0	0	-0.406334	3.29322	-0.406334	-0.406334	-0.406334	-0.406334	-0.406334	-0.406334	-0.406334	1.11702	-0.406334	0.872106	-0.406334	-0.406334	-0.406334	-0.406334
AIRE	4.36571	-0.0615283	0.063629	-1.75531	0.079206	0.999738	3.59842	1.29785	0	0	5.5146	6.74929	1.28149	8.69553	7.15164	8.55055	8.0395	0	4.64187	2.4232	2.23177	9.6756	-0.222856	-0.891054	-1.26801	-1.26801	0.333695	0.692306	-0.895805	1.25759	0.80917	1.21548	1.06705	-1.26801	0.080212	-0.564199	-0.619798	1.54225
AIRN	22.0506	0.105566	0.0994938	1.08725	0.276928	0.999738	11.9947	32.4462	14.6856	18.8912	51.4696	36.4461	29.4743	26.7555	14.8534	8.01614	16.079	22.4246	36.2066	16.9624	7.8112	8.29337	-0.807492	0.834768	-0.591412	-0.253703	2.36236	1.15597	0.596122	0.377801	-0.577939	-1.12698	-0.479524	0.0300285	1.13673	-0.408589	-1.14343	-1.10471
AJAP1	9.21512	0.0160512	0.0855398	0.274118	0.783994	0.999738	28.7874	5.19139	0.667529	3.5421	22.0584	14.8484	34.6002	0.668887	1.65038	1.60323	1.46173	0.896983	27.8512	0	2.23177	1.38223	1.61413	-0.331838	-0.704921	-0.467855	1.05919	0.46458	2.09351	-0.704809	-0.623865	-0.627754	-0.639424	-0.685998	1.53692	-0.759972	-0.575918	-0.64598
AJUBA	486.008	0.0393926	0.111542	0.338632	0.734887	0.999738	445.005	663.2	321.749	292.814	516.534	460.301	1048.26	836.108	442.852	414.702	317.926	248.464	635.008	431.329	273.392	428.491	-0.189402	0.818484	-0.758748	-0.892406	0.141007	-0.118746	2.59715	1.61718	-0.199349	-0.329379	-0.776409	-1.09727	0.688262	-0.252576	-0.982119	-0.265685
AK1	1177.2	-0.0236038	0.108008	-0.221631	0.824601	0.999738	912.8	1399.08	1039.34	945.741	830.867	1062.34	1580.08	1603.32	1325.25	1274.03	1186.19	949.905	1121.48	1381.22	992.022	1231.57	-1.12147	0.941102	-0.584737	-0.981755	-1.469	-0.487204	1.70881	1.80741	0.627973	0.410711	0.0381288	-0.964093	-0.236363	0.865358	-0.785452	0.230586
AK2	2547.22	0.0777832	0.11537	0.680324	0.496299	0.999738	2055.9	4724.16	2273.6	2478.29	2268.34	2240.76	4373.72	3061.49	1855.58	1907.84	1766.5	2245.15	2763.77	1984.6	2213.92	2541.92	-0.576502	2.55435	-0.321054	-0.0808825	-0.327231	-0.359589	2.14316	0.603431	-0.811554	-0.750227	-0.916077	-0.354443	0.254093	-0.660166	-0.39109	-0.00622214
AK3	897.288	0.0362423	0.0973525	0.38029	0.70373	0.999738	740.076	781.304	1102.76	1142.92	716.898	666.829	536.944	754.504	1054.04	1054.92	1030.52	1123.92	561.667	1001.99	1024.38	1062.93	-0.748158	-0.551958	0.977811	1.16893	-0.858457	-1.09673	-1.71484	-0.679495	0.745978	0.750176	0.634025	1.07852	-1.59719	0.498272	0.604829	0.788292
AK4	33.4976	0.0853076	0.113074	0.74376	0.457022	0.999738	46.7795	19.4677	26.7012	46.0473	66.1752	28.347	56.3855	28.0932	23.1053	26.1861	29.2345	26.9095	36.2066	35.1363	30.1289	11.0578	0.943537	-0.996675	-0.482815	0.891522	2.3214	-0.365896	1.62594	-0.383923	-0.738262	-0.519407	-0.302846	-0.468016	0.192446	0.116414	-0.239311	-1.59411
AK5	810.738	0.0936503	0.101283	0.896255	0.370117	0.999738	1428.57	231.017	144.854	234.959	1590.04	1469.99	1806.9	927.077	710.213	838.489	687.012	181.191	1621.87	791.173	143.949	164.485	1.02185	-0.958807	-1.10131	-0.952286	1.2889	1.09035	1.64756	0.192415	-0.166258	0.0458977	-0.204632	-1.04121	1.34154	-0.0323577	-1.10281	-1.06884
AK6	160.074	-0.0281914	0.114666	-0.247442	0.804566	0.999738	225.501	94.7428	165.547	214.887	244.481	214.627	116.616	96.3197	128.179	123.983	127.901	162.354	185.675	155.084	162.919	142.37	1.41656	-1.41449	0.118495	1.18676	1.82748	1.18112	-0.940921	-1.38035	-0.690551	-0.781408	-0.696578	0.0493571	0.554279	-0.108032	0.0615968	-0.383323
AK7	1.94111	0.0703785	0.0511631	1.64127	0.100742	0.999738	0	5.19139	2.00259	11.807	0	0	0	1.33777	1.10025	0	2.19259	5.3819	0.928375	0	1.11589	0	-0.615973	1.03141	0.0195089	3.13075	-0.615973	-0.615973	-0.615973	-0.191457	-0.266829	-0.615973	0.0798027	1.09187	-0.321372	-0.615973	-0.261869	-0.615973
AK8	13.6909	0.134195	0.097779	1.43072	0.152512	0.999738	11.9947	24.6591	15.3532	2.3614	11.0292	10.7989	29.4743	20.0666	11.0025	11.2226	14.6173	17.0427	10.2121	7.26959	12.2747	9.6756	-0.256408	1.65806	0.251285	-1.71268	-0.402369	-0.43719	2.38597	0.963814	-0.406401	-0.373133	0.140039	0.506688	-0.525887	-0.970711	-0.214082	-0.606993
AK9	24.2982	0.0211132	0.106464	0.1849	0.853308	0.999738	17.9921	18.1699	18.0233	29.5175	5.5146	35.0963	6.40745	24.7488	35.2081	49.7001	36.5432	19.7336	13.9256	29.0783	20.0859	29.0268	-0.540844	-0.525601	-0.538171	0.447633	-1.61098	0.926098	-1.53441	0.038644	0.935688	2.1786	1.05019	-0.391484	-0.889609	0.409968	-0.361268	0.405548
AKAP1	554.996	0.0116086	0.0718921	0.162513	0.870902	0.999738	518.173	538.606	619.467	513.605	597.415	557.491	584.359	509.023	551.227	521.584	510.874	631.476	480.898	576.72	603.694	565.332	-0.828341	-0.368692	1.45026	-0.931108	0.95421	0.0561155	0.660511	-1.03418	-0.0847981	-0.751616	-0.992541	1.7204	-1.66684	0.488681	1.09544	0.232487
AKAP10	667.038	0.0425156	0.0563795	0.754426	0.450593	0.999738	604.535	698.242	693.563	687.167	637.856	677.628	586.922	647.482	698.111	733.21	645.352	730.144	583.019	679.706	689.617	680.056	-1.36502	0.681459	0.579277	0.439608	-0.637324	0.23128	-1.74968	-0.427089	0.678598	1.44514	-0.473601	1.37819	-1.83491	0.276661	0.493104	0.284311
AKAP11	2681.25	-0.0186301	0.115155	-0.16264	0.870802	0.999738	3027.47	1303.04	2563.31	3658.99	3465.01	3074.97	1589.05	1658.17	2559.19	3065.37	3055.74	2968.12	2428.63	3107.75	3082.07	2293.12	0.509001	-2.02618	-0.173387	1.43742	1.15224	0.578835	-1.6057	-1.50408	-0.179449	0.564719	0.550557	0.421737	-0.371392	0.627016	0.589272	-0.570613
AKAP12	5186.84	0.0669268	0.0932862	0.734989	0.462346	0.999738	2957.9	6741.02	6117.9	8810.38	3009.13	3031.78	2810.31	4607.96	4726.14	5203.01	6352.67	6941.75	2293.09	5696.93	7557.89	6131.57	-1.14796	0.800442	0.479523	1.86622	-1.12157	-1.10991	-1.22398	-0.298138	-0.237274	0.00832918	0.600431	0.903825	-1.49036	0.262711	1.22115	0.486559
AKAP13	4369.36	0.00436621	0.0761569	0.0636238	0.94927	0.999738	3278.16	4770.88	5184.03	5855.09	3623.09	3409.74	3138.37	3623.36	4113.85	4053.5	4673.14	5839.36	3183.4	4166.68	6149.64	4847.48	-1.08987	0.401037	0.813681	1.48393	-0.745361	-0.958456	-1.2295	-0.745097	-0.255204	-0.315481	0.303412	1.46821	-1.18452	-0.20243	1.77812	0.477535
AKAP17A	1421.77	0.0613411	0.103965	0.597717	0.550029	0.999738	1349.41	2173.89	1526.64	1343.64	1290.42	1348.51	1881.23	1414.7	1172.87	1150.05	1067.06	1421.72	1648.79	941.411	1439.49	1578.51	-0.23766	2.47024	0.344427	-0.256618	-0.43141	-0.240621	1.50902	-0.0232372	-0.817477	-0.892427	-1.16499	-0.000171951	0.745625	-1.57767	0.0582038	0.514773
AKAP2	4175.49	-0.0284084	0.0936236	-0.303019	0.761875	0.999738	6559.93	3461.36	3260.88	3027.31	5972.31	5886.73	4523.66	3230.72	3227.04	3617.95	3502.3	3591.52	7696.23	2907.83	3501.65	2840.48	1.58928	-0.475989	-0.609612	-0.765288	1.19762	1.14058	0.232059	-0.629712	-0.632165	-0.371614	-0.448701	-0.389233	2.34665	-0.844925	-0.449134	-0.889818
AKAP3	7.04115	0.0553659	0.0873561	0.555632	0.578462	0.999738	15.5932	0	0.667529	7.0842	14.7056	14.8484	15.3779	6.68887	7.15164	7.48173	2.92345	0.896983	8.35537	7.26959	2.23177	1.38223	1.5368	-1.2653	-1.14534	0.00773571	1.37731	1.40297	1.49811	-0.0633062	0.0198555	0.0791726	-0.739952	-1.10411	0.236166	0.0410495	-0.864248	-1.01691
AKAP5	33.2865	0.0596646	0.115401	0.528728	0.596994	0.999738	28.7874	44.1268	27.3687	34.2403	58.8224	36.4461	34.6002	32.7754	31.9073	24.0484	26.3111	28.7035	35.2782	19.3856	43.5195	26.2623	-0.474966	1.14441	-0.624737	0.100697	2.69582	0.333567	0.138692	-0.0539481	-0.145593	-0.975256	-0.736388	-0.483827	0.210271	-1.46751	1.0803	-0.741534
AKAP6	89.9855	-0.228383	0.113578	-1.95292	0.0508291	0.999738	22.79	109.019	130.836	135.781	22.0584	18.898	20.5038	54.8487	72.0666	73.7485	92.8197	167.736	15.7824	95.7162	239.915	167.25	-1.02078	0.289144	0.620565	0.695682	-1.0319	-1.07991	-1.05551	-0.533772	-0.272211	-0.24666	0.043054	1.18112	-1.12724	0.0870562	2.27762	1.17374
AKAP7	59.9961	0.0149945	0.11513	0.116148	0.907535	0.999738	63.5721	22.0634	56.74	60.2157	110.292	70.1926	57.667	42.8087	60.5139	72.1453	69.432	49.3341	56.6309	76.3306	54.6784	37.3202	0.185611	-1.96883	-0.169002	0.0114003	2.61053	0.529233	-0.120885	-0.89208	0.0268786	0.630586	0.489759	-0.553394	-0.174665	0.84782	-0.276006	-1.17695
AKAP8	1165.68	0.0706979	0.092509	0.763812	0.444979	0.999738	1129.9	1401.67	1104.76	990.607	1183.8	1205.42	1573.67	1334.43	1103	1074.7	991.051	1121.23	1345.21	980.182	1034.43	1076.76	-0.212609	1.40265	-0.362054	-1.04052	0.107723	0.236228	2.42489	1.00297	-0.372497	-0.540733	-1.03789	-0.264177	1.06708	-1.10248	-0.78009	-0.528498
AKAP8L	1225.52	0.0229924	0.0897681	0.255723	0.798165	0.999738	1037.55	1404.27	1223.58	1157.09	1009.17	1136.58	1453.21	1559.84	1339.01	1228.61	1148.92	1088.94	1125.19	1313.37	1129.28	1253.68	-1.22091	1.16103	-0.0125773	-0.444473	-1.4052	-0.577666	1.4789	2.17151	0.737143	0.0200722	-0.49753	-0.887113	-0.651644	0.570632	-0.625107	0.182931
AKAP9	1237.6	-0.00284065	0.113454	-0.00928531	0.992592	0.999738	1169.49	682.667	1260.96	2379.11	1533.06	1171.68	602.3	726.411	1125.56	1186.92	1285.59	1512.31	790.047	1427.26	1633.66	1314.5	-0.155848	-1.26982	0.0534706	2.61209	0.676102	-0.150841	-1.45373	-1.16973	-0.256369	-0.11595	0.109822	0.628629	-1.02411	0.434009	0.906293	0.175978
AKIP1	472.963	-0.00186742	0.0962445	-0.0222803	0.982224	0.999738	497.782	556.776	435.896	330.596	446.683	460.301	577.952	573.236	483.561	515.171	420.977	404.539	469.758	499.178	443.006	451.989	0.384425	1.29819	-0.574115	-2.20511	-0.407046	-0.19611	1.62617	1.55313	0.164161	0.653761	-0.805197	-1.05981	-0.0496428	0.406052	-0.463991	-0.324863
AKIRIN2	898.417	0.0706393	0.0934278	0.752237	0.451908	0.999738	861.223	1014.92	871.793	912.681	705.869	812.614	966.243	1190.62	1035.34	966.747	905.54	745.393	970.151	970.49	680.69	764.372	-0.275764	0.863731	-0.197395	0.105753	-1.42757	-0.636153	0.502863	2.1664	1.01514	0.5066	0.0528064	-1.13454	0.531842	0.53435	-1.61425	-0.99382
AKNA	386.84	0.0227669	0.0830197	0.279535	0.779834	0.999738	238.695	556.776	522.008	390.812	273.892	301.018	281.928	391.968	401.592	373.552	390.281	463.74	280.369	347.729	524.466	450.607	-1.52014	1.74376	1.38699	0.0407597	-1.15898	-0.880635	-1.07653	0.0526196	0.151383	-0.136344	0.0353148	0.789096	-1.09252	-0.401328	1.41222	0.654329
AKNAD1	5.02075	0.0437034	0.068965	0.639933	0.522216	0.999738	4.7979	1.29785	6.00776	11.807	11.0292	4.04957	0	1.33777	5.50127	9.61937	8.0395	1.79397	5.57025	3.63479	4.46354	1.38223	-0.0620579	-1.03673	0.274858	1.88979	1.6732	-0.270447	-1.39815	-1.02561	0.133811	1.2806	0.840643	-0.898574	0.153021	-0.385952	-0.155168	-1.01323
AKR1A1	1560.77	0.0327111	0.112939	0.296933	0.766518	0.999738	1039.94	2754.03	1784.97	1552.62	1045.94	1159.53	1742.83	2024.05	1396.77	1321.06	1471.96	1429.79	1357.28	1380.01	1543.27	1968.29	-1.21218	2.7772	0.521808	-0.0189707	-1.19823	-0.933859	0.423713	1.07824	-0.381696	-0.557906	-0.206703	-0.304846	-0.473599	-0.420707	-0.0407357	0.94847
AKR1B1	4273.62	0.0504254	0.107215	0.475841	0.634187	0.999738	2783.98	6099.88	4537.2	3602.32	2678.26	3077.67	4820.96	5125.68	4791.6	4792.58	5018.84	4320.77	3229.82	4140.03	4282.77	5075.54	-1.54628	1.89571	0.2736	-0.696829	-1.65602	-1.24142	0.568157	0.884459	0.53768	0.5387	0.773558	0.0489409	-1.08349	-0.138669	0.00949641	0.832419
AKR1B10	16.9623	0.0759139	0.0992121	0.77901	0.435974	0.999738	7.19685	5.19139	10.0129	15.3491	25.7348	8.09914	14.0964	20.7355	23.1053	40.0807	29.2345	16.1457	3.7135	26.6551	6.69531	19.3512	-0.95549	-1.15171	-0.679954	-0.157845	0.858329	-0.867207	-0.280416	0.369177	0.60105	2.26198	1.20075	-0.0799042	-1.29631	0.948378	-1.00456	0.233734
AKR1B15	0.160183	-0.00316273	0.0149914	-0.164949	0.868984	0.999738	0	0	0	1.1807	0	0	0	0	0	0	0	0	0	0	0	1.38223	-0.364676	-0.364676	-0.364676	2.32333	-0.364676	-0.364676	-0.364676	-0.364676	-0.364676	-0.364676	-0.364676	-0.364676	-0.364676	-0.364676	-0.364676	2.78214
AKR1C1	1347.38	-0.0961532	0.1005	-0.966355	0.333867	0.999738	707.69	686.561	867.788	602.157	597.415	749.171	650.997	2241.44	2933.82	2495.16	2658.88	920.304	538.457	2972.05	916.142	1020.08	-0.682964	-0.705522	-0.512036	-0.795635	-0.800698	-0.638677	-0.743492	0.954534	1.69376	1.22542	1.40021	-0.455967	-0.863644	1.73457	-0.460412	-0.349437
AKR1C2	138.2	0.134393	0.114869	1.18391	0.236449	0.999738	75.5669	76.573	104.802	136.961	75.3662	89.0906	83.2968	185.95	320.174	250.638	208.296	93.2862	46.4187	316.227	72.5325	76.0226	-0.695996	-0.684816	-0.371128	-0.0137672	-0.698226	-0.545718	-0.610099	0.530614	2.02213	1.24944	0.778924	-0.499095	-1.0199	1.97828	-0.729715	-0.690932
AKR1C3	252.336	-0.027865	0.0961963	-0.301692	0.762887	0.999738	87.5616	112.913	142.184	144.045	69.8516	107.989	96.1117	450.83	568.831	538.685	621.234	136.341	76.1267	593.683	141.717	149.281	-0.767976	-0.649821	-0.513396	-0.504719	-0.850519	-0.672771	-0.728127	0.925129	1.47511	1.3346	1.71934	-0.540626	-0.821272	1.59093	-0.515569	-0.480319
AKR1C6P	0.139486	-0.00725136	0.0149914	-0.412814	0.679743	0.999738	0	0	0	0	0	0	0	0	0	0	0	0	0	0	2.23177	0	-0.25	-0.25	-0.25	-0.25	-0.25	-0.25	-0.25	-0.25	-0.25	-0.25	-0.25	-0.25	-0.25	-0.25	3.75	-0.25
AKR1C8P	0.160186	0.00081879	0.0149914	0.0284465	0.977306	0.999738	0	0	0	0	0	0	2.56298	0	0	0	0	0	0	0	0	0	-0.25	-0.25	-0.25	-0.25	-0.25	-0.25	3.75	-0.25	-0.25	-0.25	-0.25	-0.25	-0.25	-0.25	-0.25	-0.25
AKR1E2	24.3543	-0.0356539	0.115051	-0.336897	0.736195	0.999738	25.189	10.3828	22.0285	14.1684	18.382	26.9971	32.0372	28.7621	30.257	28.3237	40.1975	17.0427	23.2094	25.4435	27.8971	19.3512	0.112795	-1.88814	-0.314322	-1.37655	-0.807111	0.357156	1.03828	0.595679	0.797694	0.536431	2.14108	-0.988112	-0.154732	0.1472	0.478782	-0.676132
AKR7A2	1842.96	0.0620186	0.114381	0.546044	0.585036	0.999738	1027.95	3990.88	1967.21	1453.44	1014.69	1087.98	2037.57	2982.57	1891.89	1741.64	1860.05	1544.6	1527.18	1656.25	1724.04	1979.35	-1.09519	2.88633	0.166968	-0.52342	-1.11301	-1.01451	0.261516	1.53138	0.0657508	-0.136144	0.0229681	-0.400917	-0.424337	-0.250885	-0.159793	0.183286
AKR7A3	20.5977	-0.0789009	0.110753	-0.718845	0.472237	0.999738	7.19685	19.4677	31.3739	31.8789	16.5438	13.4986	10.2519	23.411	19.2544	25.1172	13.1555	26.9095	25.9945	26.6551	16.7383	22.1157	-1.82757	-0.154104	1.46963	1.5385	-0.552856	-0.968157	-1.41093	0.383677	-0.183189	0.616366	-1.01494	0.860787	0.736002	0.826101	-0.526335	0.207017
AKR7L	15.5283	0.0391342	0.108745	0.370953	0.710673	0.999738	23.9895	19.4677	13.3506	23.614	16.5438	5.39943	7.68894	14.7155	18.1542	16.0323	16.079	13.4547	9.28375	14.5392	22.3177	13.8223	1.59201	0.741218	-0.409744	1.52136	0.191075	-1.90579	-1.47501	-0.152928	0.494072	0.0948301	0.103619	-0.390146	-1.17494	-0.186106	1.27746	-0.320991
AKT1	8788.67	-0.0528396	0.0818626	-0.647753	0.517144	0.999738	9197.57	9470.39	8109.14	6512.74	9040.27	9347.76	11402.7	9246.02	8223.29	8418.55	7793.2	8108.72	9305.1	9114.85	8324.5	9003.84	0.393027	0.655251	-0.653135	-2.18755	0.241837	0.537386	2.51252	0.439594	-0.54342	-0.35574	-0.956813	-0.653537	0.49638	0.313518	-0.446139	0.206817
AKT1S1	2639.57	-0.0197004	0.114003	-0.17327	0.862439	0.999738	2225.03	3720.93	2616.71	2016.64	1538.57	2315.01	3301.12	3834.73	2738.53	2556.08	2278.83	2374.31	2911.38	2545.57	2471.69	2787.96	-0.699804	1.82549	-0.0385788	-1.05159	-1.85863	-0.547905	1.11679	2.0176	0.167063	-0.140936	-0.60897	-0.447784	0.458863	-0.158686	-0.283407	0.2505
AKT2	3971.42	-0.0558963	0.0732996	-0.764919	0.44432	0.999738	4492.03	3964.92	3752.18	2852.57	3806.91	4238.55	4487.78	4154.45	4141.35	4050.29	3740.56	3721.58	4251.03	4060.06	3998.22	3830.16	1.35114	-0.0168527	-0.568972	-2.9037	-0.426925	0.693289	1.34009	0.475035	0.441032	0.2047	-0.599133	-0.648385	0.725667	0.230065	0.0695547	-0.366607
AKT3	1576.08	0.0303403	0.114404	0.286886	0.7742	0.999738	1499.34	869.557	2122.07	2839.58	1560.63	1174.38	741.982	848.817	1528.8	1667.89	1700.72	2250.53	971.08	1652.62	2013.06	1776.16	-0.134672	-1.23998	0.958256	2.21752	-0.0271055	-0.705007	-1.46388	-1.27638	-0.0829705	0.161141	0.218754	1.1837	-1.0618	0.134336	0.766923	0.351163
AKTIP	295.845	0.0279193	0.114767	0.245909	0.805752	0.999738	307.065	168.72	325.087	363.656	387.86	330.715	193.505	208.024	313.022	350.573	328.889	300.489	231.165	301.688	331.418	291.65	0.17813	-2.01823	0.464234	1.07655	1.46083	0.553589	-1.62475	-1.39425	0.272695	0.868848	0.524592	0.0737264	-1.02686	0.0927546	0.564747	-0.0666011
ALAD	1122.35	0.0182423	0.108462	0.172093	0.863364	0.999738	929.593	1752.09	1194.21	951.644	950.35	1000.24	1518.56	1197.98	953.919	1031.94	910.656	1062.03	1057.42	1045.61	1150.48	1250.92	-0.84119	2.74814	0.313578	-0.744959	-0.750608	-0.532873	1.72904	0.330013	-0.73503	-0.394533	-0.923829	-0.263254	-0.283367	-0.334905	0.122734	0.561044
ALAS1	1053.78	-0.140181	0.0704274	-1.99686	0.0458405	0.999738	1335.02	632.051	759.648	750.925	1134.17	1294.51	1111.05	1043.46	1246.59	1194.94	1251.24	790.242	1388.85	1281.87	846.957	798.928	1.12312	-1.68417	-1.17461	-1.20945	0.321047	0.961379	0.228721	-0.0411928	0.769984	0.563732	0.78856	-1.05243	1.33811	0.91089	-0.825943	-1.01775
ALAS2	0.390492	0.00326105	0.0242515	0.0782892	0.937598	0.999738	0	0	0.667529	0	1.8382	0	0	0	0	1.06882	1.46173	0	0	1.2116	0	0	-0.61075	-0.61075	0.4333	-0.61075	2.26429	-0.61075	-0.61075	-0.61075	-0.61075	1.06094	1.67547	-0.61075	-0.61075	1.28425	-0.61075	-0.61075
ALB	0.399566	0.00578329	0.0279876	0.196705	0.844058	0.999738	0	0	0	2.3614	0	1.34986	0	0.668887	0.550127	0.53441	0	0	0.928375	0	0	0	-0.596018	-0.596018	-0.596018	2.92639	-0.596018	1.41751	-0.596018	0.401736	0.224586	0.201141	-0.596018	-0.596018	0.788804	-0.596018	-0.596018	-0.596018
ALCAM	3303.44	0.143707	0.106364	1.36117	0.173459	0.999738	3037.07	5541.81	3321.62	3967.15	2955.83	2707.81	4519.81	3377.21	2545.44	2482.87	2525.13	3611.25	2822.26	2486.2	3464.82	3488.75	-0.32004	2.68937	0.0218497	0.797442	-0.417651	-0.715636	1.46146	0.0886324	-0.910731	-0.985906	-0.935124	0.369834	-0.578132	-0.981904	0.1939	0.222643
ALDH16A1	1511.35	0.0145437	0.109275	0.139434	0.889107	0.999738	970.375	3373.1	1451.21	891.429	863.954	985.396	2201.6	2487.59	1381.92	1214.18	1116.76	1241.42	1490.04	1319.43	1429.45	1763.72	-0.80864	2.78293	-0.0898969	-0.926648	-0.967716	-0.786187	1.03178	1.45927	-0.193471	-0.444206	-0.589827	-0.403479	-0.0318498	-0.286878	-0.122423	0.377247
ALDH18A1	3442.52	-0.0274657	0.0727263	-0.375677	0.707157	0.999738	3257.77	3636.57	3739.5	3209.14	3203.98	3446.19	3378.01	3115.67	3337.62	3318.15	3276.46	3880.35	2649.58	3735.36	3854.27	4041.64	-0.523079	0.549436	0.840875	-0.660769	-0.675375	0.0103915	-0.182652	-0.925418	-0.297007	-0.35213	-0.470165	1.23968	-2.24511	0.829146	1.16583	1.69635
ALDH1A1	82.1132	0.0174205	0.104817	-0.0477755	0.961895	0.999738	145.136	0	2.00259	1.1807	185.658	163.333	83.2968	84.2797	135.331	138.946	120.592	0	68.6997	181.74	2.23177	1.38223	0.872322	-1.13655	-1.10883	-1.12021	1.4332	1.12418	0.016383	0.0299877	0.736605	0.786646	0.532603	-1.13655	-0.185659	1.37896	-1.10566	-1.11742
ALDH1A2	149.363	-0.0365112	0.11326	-0.328023	0.742894	0.999738	2.39895	86.9557	128.166	114.528	5.5146	1.34986	8.97042	271.568	379.037	335.075	346.429	107.638	0.928375	354.998	114.936	131.312	-1.04259	-0.442729	-0.150378	-0.247126	-1.02049	-1.05004	-0.995974	0.86695	1.62936	1.31748	1.39803	-0.296005	-1.05303	1.45882	-0.24423	-0.128058
ALDH1B1	774.995	0.0733445	0.101269	0.727796	0.466738	0.999738	1000.36	1064.23	739.622	559.652	944.835	920.603	1175.13	674.907	571.031	571.818	513.797	721.174	905.165	512.506	756.57	768.519	1.08895	1.39758	-0.170918	-1.04052	0.820652	0.703562	1.93339	-0.483618	-0.985534	-0.981731	-1.26208	-0.260057	0.62897	-1.26832	-0.0890279	-0.0312911
ALDH1L2	1530.66	0.0711705	0.113615	0.633646	0.526312	0.999738	1385.39	1014.92	1741.58	1941.07	1435.63	1349.86	867.568	1195.3	1757.1	1913.72	2178.7	1852.27	994.289	2010.04	1580.09	1273.03	-0.363048	-1.28893	0.527128	1.02568	-0.237485	-0.451858	-1.65717	-0.83812	0.565917	0.957326	1.61956	0.80375	-1.34048	1.19804	0.123539	-0.643854
ALDH2	1054.55	-0.0170033	0.06743	-0.257257	0.796981	0.999738	854.026	860.472	829.739	740.299	775.721	881.457	850.909	1470.21	1762.06	1618.73	1463.19	701.441	842.964	1664.74	756.57	800.31	-0.520051	-0.503332	-0.583039	-0.814995	-0.723131	-0.448911	-0.528135	1.07799	1.83487	1.46315	1.05978	-0.915772	-0.548739	1.58247	-0.772797	-0.659359
ALDH3A1	1.40869	0.0226386	0.0399735	0.289698	0.772048	0.999738	0	0	0	1.1807	0	0	0	7.35775	1.65038	2.13764	6.57777	0	0	3.63479	0	0	-0.583079	-0.583079	-0.583079	-0.0943685	-0.583079	-0.583079	-0.583079	2.46241	0.100039	0.301724	2.13957	-0.583079	-0.583079	0.92142	-0.583079	-0.583079
ALDH3A2	423.379	0.033975	0.103436	0.332109	0.739807	0.999738	226.701	648.923	439.902	439.22	200.364	209.228	321.654	643.469	520.42	507.155	524.029	406.333	241.377	525.833	427.384	492.073	-1.34725	1.54499	0.11318	0.108514	-1.52766	-1.46694	-0.696821	1.50762	0.664731	0.573865	0.689456	-0.116765	-1.24672	0.701815	0.0274336	0.470558
ALDH3B1	1107.75	0.00447485	0.11025	0.0543687	0.956641	0.999738	669.307	2138.85	1537.32	1085.06	639.694	695.176	1052.1	1187.27	912.11	879.638	845.609	1392.12	841.107	917.179	1384.81	1546.71	-1.08357	2.54822	1.06161	-0.0560789	-1.15675	-1.01963	-0.137537	0.196521	-0.483512	-0.563761	-0.64786	0.702766	-0.658985	-0.470983	0.684715	1.08483
ALDH4A1	406.653	-0.0174467	0.111736	-0.155756	0.876226	0.999738	286.674	602.201	396.512	298.717	327.2	414.406	493.373	510.36	419.196	380.5	363.239	363.278	458.617	384.076	401.719	406.375	-1.49292	2.43326	-0.126181	-1.34307	-0.988656	0.0964769	1.07909	1.29046	0.156083	-0.325432	-0.540208	-0.539724	0.646605	-0.280924	-0.0613976	-0.00345406
ALDH5A1	5.65351	0.100172	0.0897562	1.14011	0.254242	0.999738	2.39895	2.59569	9.34541	7.0842	7.3528	4.04957	7.68894	7.35775	3.30076	5.87851	4.38518	11.6608	2.78512	4.84639	5.57943	4.14669	-1.24463	-1.16939	1.41188	0.547134	0.649855	-0.613389	0.778401	0.651747	-0.899754	0.0860441	-0.485043	2.29734	-1.09695	-0.308664	-0.028332	-0.576249
ALDH6A1	501.065	-0.0798314	0.0940764	-0.857417	0.391214	0.999738	597.338	262.165	431.891	368.378	477.932	602.036	430.58	575.911	612.291	633.275	665.817	357.896	565.38	673.648	372.706	389.788	0.745279	-1.84938	-0.535489	-1.02716	-0.179074	0.781648	-0.545637	0.579407	0.861031	1.02348	1.27539	-1.1083	0.497883	1.33601	-0.993661	-0.861418
ALDH7A1	761.908	-0.0163716	0.0727389	-0.227093	0.820351	0.999738	854.026	597.01	727.607	740.299	849.249	849.06	803.494	676.244	763.025	821.387	807.604	685.295	783.548	907.487	661.72	663.47	1.05437	-1.88739	-0.392603	-0.24733	0.999688	0.997529	0.475985	-0.980487	0.0127931	0.680793	0.523031	-0.876896	0.247692	1.66627	-1.14673	-1.1267
ALDH8A1	8.6889	0.0775528	0.0965424	0.908379	0.363678	0.999738	7.19685	7.78708	12.0155	23.614	9.191	6.74929	6.40745	6.68887	2.20051	3.20646	4.38518	17.0427	8.35537	0	14.5065	9.6756	-0.253175	-0.153023	0.564471	2.53253	0.085199	-0.329118	-0.387123	-0.339371	-1.10097	-0.930275	-0.730266	1.41749	-0.0565934	-1.47436	0.987147	0.167427
ALDH9A1	1414.83	-0.0455069	0.0958088	-0.483315	0.628872	0.999738	1732.04	883.834	1266.97	1192.51	1852.91	1738.62	1448.08	1170.55	1418.78	1567.42	1475.61	1285.38	1357.28	1595.67	1330.13	1321.41	1.28998	-2.1593	-0.601259	-0.904068	1.78148	1.31671	0.135244	-0.993351	0.0160677	0.620548	0.247198	-0.52641	-0.233995	0.735431	-0.344397	-0.379875
ALDOA	23360	-0.054163	0.0748105	-0.722709	0.469859	0.999738	22279	26234.7	26350	19167.5	18621	21897.4	20227	25048.5	24465.8	23638.5	22858.5	25310.2	21924.5	23324.5	25191.1	27221.6	-0.420979	1.11956	1.16449	-1.63279	-1.84563	-0.569616	-1.22014	0.657586	0.430656	0.108484	-0.195311	0.759507	-0.559057	-0.0138325	0.713139	1.50393
ALDOB	1.00902	-0.0174257	0.0399742	-0.551216	0.581486	0.999738	2.39895	0	0	0	5.5146	1.34986	0	0	0	1.06882	0.730863	0.896983	1.85675	1.2116	1.11589	0	0.97731	-0.709478	-0.709478	-0.709478	3.16804	0.239655	-0.709478	-0.709478	-0.709478	0.0420475	-0.195581	-0.0787767	0.596069	0.14244	0.0751412	-0.709478
ALDOC	267.673	0.00318702	0.0847145	0.0358333	0.971415	0.999738	207.509	233.612	279.027	281.007	220.584	233.525	174.283	294.979	382.888	333.472	331.812	241.288	192.174	344.094	253.306	279.21	-1.01957	-0.577211	0.192412	0.225957	-0.797996	-0.578687	-1.58265	0.46274	1.9525	1.11506	1.08693	-0.44713	-1.27946	1.29507	-0.243474	0.195514
ALG1	1047.45	-0.00092696	0.0979605	-0.00815287	0.993495	0.999738	958.38	1369.23	1027.99	876.079	946.673	1013.74	1401.95	1121.72	934.115	942.698	863.881	1081.76	1065.77	992.298	1014.34	1148.63	-0.577299	2.08545	-0.126119	-1.1107	-0.653171	-0.218488	2.29752	0.48134	-0.734565	-0.678933	-1.18976	0.222346	0.118732	-0.357471	-0.214621	0.655742
ALG10	171.835	-0.0148868	0.103599	-0.143041	0.886257	0.999738	217.105	137.572	138.846	238.501	183.82	180.881	173.001	134.446	150.185	151.238	166.637	184.778	175.463	176.893	179.657	160.339	1.62089	-1.2268	-1.18118	2.38699	0.429123	0.323883	0.0417455	-1.33872	-0.775202	-0.737486	-0.186124	0.463437	0.129889	0.181106	0.28008	-0.411637
ALG10B	175.77	0.0526983	0.112195	0.467284	0.640296	0.999738	184.719	129.785	155.534	229.056	286.759	205.178	162.749	112.373	156.786	145.894	171.022	208.997	181.961	175.682	160.687	145.134	0.213321	-1.09613	-0.482348	1.27016	2.64562	0.701	-0.31037	-1.51117	-0.45251	-0.712145	-0.113171	0.792026	0.147588	-0.00210144	-0.359514	-0.730256
ALG11	313.551	0.0531056	0.113807	0.47372	0.6357	0.999738	367.039	128.487	385.164	399.077	408.081	349.613	162.749	209.361	325.125	351.107	344.237	404.539	245.091	317.439	357.083	262.623	0.615333	-2.12899	0.823845	0.983894	1.08748	0.414861	-1.73484	-1.1986	0.133146	0.432048	0.353011	1.04674	-0.787569	0.0447236	0.500798	-0.585874
ALG12	896.009	-0.0561136	0.107391	-0.522687	0.601192	0.999738	812.044	1104.47	934.541	563.194	628.665	832.862	1073.89	1058.85	950.068	924.529	814.182	891.601	868.03	911.121	956.313	1011.79	-0.570536	1.41646	0.26182	-2.26146	-1.81659	-0.429081	1.20868	1.10648	0.367331	0.193788	-0.556011	-0.0299528	-0.190114	0.102687	0.409765	0.786734
ALG13	383.123	0.0719528	0.112454	0.638419	0.523201	0.999738	446.205	251.782	375.819	515.966	514.696	392.808	267.831	300.33	401.042	352.71	439.98	435.037	398.273	371.96	350.388	315.148	0.815722	-1.69842	-0.0944584	1.71783	1.70141	0.125239	-1.49088	-1.07063	0.231713	-0.393283	0.735228	0.671307	0.1959	-0.144353	-0.423315	-0.879012
ALG1L	1.32356	-0.0889874	0.0416908	-1.58502	0.112961	0.999738	0	0	0	1.1807	0	0	2.56298	3.34443	0.550127	0.53441	0.730863	0	7.427	4.84639	0	0	-0.608831	-0.608831	-0.608831	-0.0657133	-0.608831	-0.608831	0.57013	0.929596	-0.355775	-0.363005	-0.272637	-0.608831	2.80756	1.62049	-0.608831	-0.608831
ALG1L9P	6.62694	-0.00363622	0.0858419	-0.0289291	0.976921	0.999738	2.39895	7.78708	5.34023	1.1807	11.0292	6.74929	14.0964	8.69553	4.40101	4.27528	8.77036	5.3819	13.9256	7.26959	3.34766	1.38223	-1.06014	0.290898	-0.322632	-1.36561	1.10384	0.0306781	1.87291	0.518684	-0.558136	-0.589663	0.537449	-0.312185	1.8301	0.16114	-0.822258	-1.31508
ALG2	1077.96	0.105934	0.113338	0.954849	0.339654	0.999738	774.861	2571.03	1117.44	1010.68	794.103	899.005	1786.4	1245.47	712.414	681.907	739.634	1044.09	1095.48	703.938	884.897	1185.95	-0.621722	3.06266	0.0809982	-0.138001	-0.582251	-0.367072	1.45318	0.343604	-0.749815	-0.812392	-0.69398	-0.0694718	0.0359496	-0.7672	-0.396011	0.221525
ALG3	927.444	-0.102286	0.107242	-0.945459	0.344425	0.999738	843.231	1377.02	1117.44	793.43	477.932	765.369	730.449	1050.82	913.21	836.885	802.488	1040.5	960.868	907.487	1149.36	1072.61	-0.403228	2.15263	0.909755	-0.64168	-2.15234	-0.776044	-0.943248	0.590752	-0.0681537	-0.43361	-0.598311	0.541335	0.16004	-0.0955585	1.06258	0.69508
ALG5	257.078	0.0620722	0.105649	0.588533	0.556175	0.999738	292.672	201.166	339.772	317.608	235.29	233.525	203.757	195.315	237.655	266.67	287.96	306.768	258.088	242.32	226.525	268.152	0.82755	-1.29992	1.92262	1.40732	-0.506563	-0.547586	-1.23969	-1.43596	-0.451579	0.223026	0.718007	1.15529	0.0234923	-0.343123	-0.710348	0.257482
ALG6	73.6355	-0.0404351	0.115403	-0.357094	0.721021	0.999738	106.753	40.2332	60.0776	88.5525	84.5572	101.239	56.3855	42.1399	77.5678	83.9023	76.0098	62.7888	83.5537	82.3886	78.112	53.9069	1.71125	-1.72596	-0.700562	0.770788	0.564345	1.42634	-0.891339	-1.62744	0.20319	0.530503	0.122683	-0.560471	0.512491	0.452289	0.231305	-1.01941
ALG8	376.553	0.00799971	0.115266	0.0629579	0.9498	0.999738	516.974	163.529	374.484	417.968	459.55	479.199	313.965	242.806	371.886	385.844	423.17	413.509	346.284	405.885	384.98	324.824	1.60919	-2.44123	-0.0237177	0.474602	0.951131	1.17631	-0.717256	-1.53273	-0.0534938	0.106465	0.534218	0.423506	-0.346886	0.336137	0.0965708	-0.592815
ALG9	574.524	-0.0546345	0.114718	-0.4854	0.627393	0.999738	792.853	282.931	575.41	511.243	718.737	747.821	404.951	385.279	561.679	643.964	632.197	585.73	576.521	642.147	578.028	552.891	1.64077	-2.19136	0.00666099	-0.475563	1.08378	1.30235	-1.27437	-1.4222	-0.0965287	0.52185	0.433422	0.0842151	0.0150071	0.508197	0.0263384	-0.16257
ALK	22.249	0.095705	0.0950474	1.0898	0.275803	0.999738	33.5853	6.48923	2.67012	5.9035	49.6314	47.245	65.356	14.0466	8.2519	18.7043	11.6938	12.5578	71.4848	3.63479	3.34766	1.38223	0.481787	-0.669786	-0.832097	-0.694679	1.16374	1.06232	1.83203	-0.3486	-0.594873	-0.150648	-0.448593	-0.411876	2.09251	-0.791099	-0.803302	-0.886832
ALKBH1	151.218	0.04699	0.0952703	0.48937	0.62458	0.999738	191.916	121.998	137.511	136.961	145.218	172.782	140.964	157.857	194.195	157.116	165.175	127.372	158.752	139.334	156.224	116.107	1.80185	-1.29366	-0.606835	-0.631176	-0.265626	0.954716	-0.453967	0.29396	1.90274	0.261161	0.617948	-1.05574	0.333577	-0.526137	0.221647	-1.55445
ALKBH2	210.161	0.0360292	0.0850345	0.425983	0.67012	0.999738	178.722	216.74	248.321	273.922	193.011	224.076	196.068	183.275	191.994	199.869	190.025	230.525	235.807	178.105	212.018	210.099	-1.16589	0.243987	1.4151	2.3645	-0.635983	0.516028	-0.522627	-0.997036	-0.673695	-0.381661	-0.746737	0.755154	0.951051	-1.18876	0.0688682	-0.00231018
ALKBH3	239.111	0.0350723	0.0786862	0.447532	0.654491	0.999738	239.895	267.356	280.362	219.61	229.775	251.073	222.979	214.044	249.207	203.61	236.8	259.228	233.022	212.03	251.074	255.712	0.0363831	1.31119	1.91493	-0.905261	-0.433392	0.555307	-0.748872	-1.16367	0.468679	-1.64801	-0.107298	0.933855	-0.282665	-1.25717	0.555339	0.77065
ALKBH3-AS1	1.69302	0.0473269	0.051081	0.964984	0.334553	0.999738	2.39895	0	0.667529	3.5421	7.3528	1.34986	0	0	2.20051	1.60323	2.92345	1.79397	0.928375	1.2116	1.11589	0	0.380892	-0.913481	-0.55331	0.997689	3.05379	-0.185154	-0.913481	-0.913481	0.273821	-0.0484454	0.663893	0.0544684	-0.412569	-0.259753	-0.311396	-0.913481
ALKBH4	367.97	0.0250671	0.11529	0.210418	0.833341	0.999738	344.249	499.671	304.393	204.261	290.436	409.007	586.922	532.434	352.081	343.625	339.852	278.962	448.405	335.613	278.971	338.646	-0.23165	1.28612	-0.620864	-1.59871	-0.757166	0.40074	2.13817	1.60607	-0.155169	-0.237742	-0.274596	-0.869216	0.785484	-0.315992	-0.869123	-0.286368
ALKBH5	6590.54	0.0631911	0.111711	0.567742	0.57021	0.999738	5677.11	10006.4	6651.93	5452.47	5137.77	6202.59	9174.18	8374.46	6199.38	5945.84	5508.52	5946.1	6960.95	5630.29	6006.81	6573.88	-0.651619	2.43679	0.0437902	-0.811872	-1.03637	-0.276754	1.84311	1.2726	-0.279049	-0.459915	-0.771891	-0.459731	0.264242	-0.685018	-0.416422	-0.0118873
ALKBH6	375.486	0.0300571	0.114308	0.259026	0.795615	0.999738	315.462	532.117	365.806	344.764	218.746	307.767	439.551	567.216	411.495	357.52	354.469	346.235	456.76	357.421	297.941	334.499	-0.680412	1.77553	-0.109726	-0.348247	-1.77675	-0.767633	0.726223	2.1734	0.408187	-0.203653	-0.238241	-0.331572	0.921305	-0.204772	-0.879019	-0.464608
ALKBH7	788.41	0.0378315	0.111086	0.33602	0.736856	0.999738	530.168	1426.33	791.69	480.545	457.712	550.742	1140.53	1475.56	813.087	758.327	638.775	600.979	878.242	703.938	557.943	809.986	-0.828237	2.04596	0.0105191	-0.987388	-1.06062	-0.762252	1.12931	2.20385	0.0791454	-0.0964811	-0.479912	-0.601132	0.288113	-0.270918	-0.739158	0.0691998
ALKBH8	289.988	-0.0117386	0.115053	-0.0932205	0.925728	0.999738	346.648	155.742	382.494	443.943	369.478	303.718	220.416	147.155	248.107	247.966	238.261	324.708	180.105	295.63	376.053	359.379	0.641634	-1.52023	1.04756	1.74342	0.900168	0.155483	-0.787843	-1.61747	-0.474266	-0.475863	-0.585759	0.393177	-1.24434	0.0638918	0.974623	0.785806
ALMS1	812.452	-0.0220411	0.114735	-0.203608	0.83866	0.999738	1113.11	345.227	678.877	889.067	1275.71	1085.29	507.47	525.076	727.817	806.958	951.584	862.001	881.956	806.924	963.009	579.154	1.22201	-1.899	-0.542904	0.311397	1.88288	1.10891	-1.23958	-1.16802	-0.34399	-0.0223275	0.565493	0.201387	0.282494	-0.0224674	0.611927	-0.948221
ALMS1-IT1	8.97048	0.0259391	0.096567	0.303952	0.761164	0.999738	8.39632	5.19139	10.6805	11.807	22.0584	6.74929	8.97042	8.02664	5.50127	3.74087	7.30863	11.6608	15.7824	4.84639	10.043	2.76446	-0.117996	-0.776644	0.351421	0.582936	2.68971	-0.456479	-1.11458e-05	-0.193969	-0.712961	-1.07474	-0.341527	0.552885	1.39992	-0.847545	0.220408	-1.2754
ALMS1P	0.560824	0.0132371	0.0280012	0.482683	0.629321	0.999738	0	1.29785	0	2.3614	1.8382	0	0	0	1.65038	0	0	0.896983	0.928375	0	0	0	-0.686955	0.902781	-0.686955	2.20553	1.56466	-0.686955	-0.686955	-0.686955	1.3346	-0.686955	-0.686955	0.411762	0.450214	-0.686955	-0.686955	-0.686955
ALOX12	4.69891	-0.0886181	0.07875	-1.06156	0.288437	0.999738	9.5958	6.48923	0.667529	4.7228	3.6764	4.04957	5.12596	4.68221	4.95114	2.13764	4.38518	0.896983	9.28375	10.9044	2.23177	1.38223	1.58665	0.580085	-1.30621	0.00774074	-0.331304	-0.210393	0.138368	-0.00541233	0.081725	-0.829881	-0.101652	-1.23187	1.48554	2.01064	-0.799382	-1.07464
ALOX12-AS1	7.79421	0.0514031	0.0912362	0.544782	0.585903	0.999738	3.59842	2.59569	6.00776	14.1684	12.8674	9.449	14.0964	6.01998	7.70177	9.08496	10.963	2.69095	7.427	9.69278	5.57943	2.76446	-1.06804	-1.32329	-0.454743	1.62256	1.29139	0.42123	1.60423	-0.451633	-0.0235301	0.328564	0.806609	-1.29904	-0.0934744	0.483285	-0.563777	-1.28033
ALOX12P2	2.5511	0.09258	0.0561346	1.55831	0.11916	0.999738	3.59842	0	0.667529	0	14.7056	1.34986	1.28149	4.01332	4.40101	4.27528	4.38518	0	0.928375	1.2116	0	0	0.283788	-0.691263	-0.510385	-0.691263	3.29346	-0.325497	-0.344023	0.396211	0.501262	0.467192	0.496973	-0.691263	-0.439705	-0.362961	-0.691263	-0.691263
ALOX15	0.285152	0.00304736	0.0149936	0.29456	0.76833	0.999738	0	3.89354	0	0	0	0	0	0.668887	0	0	0	0	0	0	0	0	-0.291985	3.69487	-0.291985	-0.291985	-0.291985	-0.291985	-0.291985	0.392931	-0.291985	-0.291985	-0.291985	-0.291985	-0.291985	-0.291985	-0.291985	-0.291985
ALOX15B	0.122836	0.000925895	0.0149914	0.103747	0.91737	0.999738	0	1.29785	0.667529	0	0	0	0	0	0	0	0	0	0	0	0	0	-0.346181	3.31146	1.53507	-0.346181	-0.346181	-0.346181	-0.346181	-0.346181	-0.346181	-0.346181	-0.346181	-0.346181	-0.346181	-0.346181	-0.346181	-0.346181
ALOX5	1.12274	-0.0430688	0.0400074	-1.01578	0.309732	0.999738	0	0	0	1.1807	1.8382	5.39943	0	0.668887	0.550127	0.53441	0.730863	0	3.7135	0	3.34766	0	-0.684756	-0.684756	-0.684756	0.0353525	0.436362	2.60835	-0.684756	-0.276803	-0.349234	-0.35882	-0.239003	-0.684756	1.58011	-0.684756	1.35698	-0.684756
ALOX5AP	3.01244	0.0681033	0.0695099	1.02264	0.306479	0.999738	1.19947	1.29785	6.67529	1.1807	1.8382	6.74929	3.84447	6.01998	2.20051	1.60323	3.65432	3.58793	0.928375	2.4232	2.23177	2.76446	-0.931432	-0.880893	1.88183	-0.941078	-0.603279	1.91985	0.427465	1.54516	-0.41714	-0.723999	0.329773	0.295666	-1.07071	-0.302731	-0.401078	-0.127404
ALOXE3	3.21924	-0.0249399	0.0702272	-0.374122	0.708313	0.999738	0	2.59569	8.67788	1.1807	1.8382	0	0	2.00666	4.40101	2.67205	3.65432	8.07285	1.85675	1.2116	7.8112	5.52891	-1.10828	-0.214667	1.87924	-0.701805	-0.475448	-1.10828	-1.10828	-0.417453	0.406848	-0.188381	0.149784	1.67095	-0.469063	-0.691168	1.58087	0.79515
ALPI	0.164459	0.00081879	0.0149914	0.0284466	0.977306	0.999738	0	0	0	0	0	1.34986	1.28149	0	0	0	0	0	0	0	0	0	-0.365821	-0.365821	-0.365821	-0.365821	-0.365821	2.63679	2.48471	-0.365821	-0.365821	-0.365821	-0.365821	-0.365821	-0.365821	-0.365821	-0.365821	-0.365821
ALPK1	348.683	-0.0248183	0.0948965	-0.275942	0.782592	0.999738	395.827	168.72	222.287	253.851	477.932	418.456	372.913	337.119	448.353	483.641	464.829	226.937	378.777	455.561	233.22	240.508	0.4356	-1.66284	-1.16788	-0.876242	1.19425	0.644691	0.223885	-0.106852	0.920939	1.24699	1.07318	-1.12492	0.278063	0.987537	-1.06687	-0.999527
ALPK2	119.949	-0.0274489	0.114685	-0.154992	0.876827	0.999738	10.7953	193.379	311.069	252.67	20.2202	12.1487	7.68894	28.7621	31.9073	34.2022	40.9284	344.441	7.427	39.9827	334.766	248.801	-0.817407	0.549884	1.43121	0.993886	-0.746827	-0.807271	-0.840669	-0.682861	-0.659308	-0.642122	-0.591753	1.68112	-0.84263	-0.598835	1.60866	0.964915
ALPK3	747.273	-0.107037	0.0982257	-1.09542	0.273333	0.999738	28.7874	1474.35	1389.8	1203.13	31.2494	17.5481	20.5038	634.773	824.64	626.862	724.286	1288.07	38.9917	631.242	1561.12	1461.02	-1.21424	1.22877	1.08586	0.770403	-1.21008	-1.23323	-1.22824	-0.190125	0.130749	-0.203494	-0.038849	0.913941	-1.19699	-0.196092	1.3754	1.20622
ALPL	8.22235	0.0184008	0.0737666	0.492057	0.622679	0.999738	7.19685	18.1699	22.0285	12.9877	1.8382	1.34986	0	3.34443	0.550127	0.53441	0	26.9095	0	2.4232	24.5495	9.6756	-0.106248	1.03061	1.43039	0.493716	-0.661432	-0.712028	-0.85188	-0.505379	-0.794884	-0.796512	-0.85188	1.93609	-0.85188	-0.600824	1.69158	0.150564
ALPP	0.254782	0.00297276	0.0149932	0.277586	0.78133	0.999738	0	0	0	3.5421	0	0	0	0	0	0.53441	0	0	0	0	0	0	-0.287338	-0.287338	-0.287338	3.70738	-0.287338	-0.287338	-0.287338	-0.287338	-0.287338	0.315359	-0.287338	-0.287338	-0.287338	-0.287338	-0.287338	-0.287338
ALS2	1049.05	-0.0192643	0.104268	-0.182369	0.855293	0.999738	1194.68	715.114	1078.06	1292.87	1281.23	1092.03	911.139	740.457	918.161	950.715	1060.48	1243.22	1032.35	926.872	1237.52	1109.93	0.812315	-1.86274	0.161811	1.36003	1.2951	0.239765	-0.769292	-1.72137	-0.73012	-0.548533	0.0637667	1.08309	-0.0931473	-0.681529	1.05128	0.339586
ALS2CL	17.4422	-0.0390754	0.111896	-0.347293	0.728371	0.999738	3.59842	31.1483	20.0259	22.4333	5.5146	5.39943	12.8149	21.4044	26.9562	21.9108	16.8099	13.4547	5.57025	27.8667	23.4336	20.7334	-1.57517	1.55951	0.293978	0.5679	-1.35714	-1.37025	-0.526502	0.450826	1.08252	0.508448	-0.0719462	-0.453698	-1.35081	1.18613	0.681715	0.374485
ALS2CR11	30.9079	-0.0305021	0.107116	-0.282808	0.777324	0.999738	31.1863	6.48923	25.3661	35.421	44.1168	47.245	26.9113	27.4243	33.0076	37.4087	32.8889	18.8366	34.3499	64.2147	8.92708	20.7334	0.0196174	-1.72063	-0.390496	0.318007	0.930744	1.15117	-0.281619	-0.245465	0.147949	0.458064	0.139583	-0.850585	0.24253	2.34691	-1.54885	-0.716931
ALS2CR12	7.90419	0.0307977	0.0873735	0.368681	0.712365	0.999738	8.39632	2.59569	10.0129	9.4456	16.5438	12.1487	1.28149	3.34443	10.4524	6.41291	8.77036	8.07285	8.35537	4.84639	3.34766	12.4401	0.119845	-1.29273	0.513524	0.375366	2.10393	1.03363	-1.61276	-1.11039	0.620543	-0.363156	0.210931	0.0410717	0.109873	-0.744636	-1.10961	1.10458
ALX1	0.184093	-0.00226857	0.0149914	-0.197864	0.843151	0.999738	1.19947	0	0	0	0	0	0	0	0	0.53441	0	0	0	1.2116	0	0	2.41572	-0.43798	-0.43798	-0.43798	-0.43798	-0.43798	-0.43798	-0.43798	-0.43798	0.833449	-0.43798	-0.43798	-0.43798	2.44457	-0.43798	-0.43798
ALX3	53.3534	-0.112209	0.1139	-0.988124	0.323092	0.999738	33.5853	51.9139	40.0517	53.1315	82.719	47.245	75.6079	50.8354	44.5602	43.8216	51.8913	46.6431	60.3444	53.3103	55.7943	62.2003	-1.58969	-0.115766	-1.06968	-0.0178478	2.36148	-0.49122	1.78962	-0.202494	-0.707119	-0.76652	-0.11758	-0.539622	0.562185	-0.00347001	0.196281	0.711433
ALX4	19.121	0.187719	0.108474	1.7994	0.0719558	0.999738	13.1942	32.4462	22.696	28.3368	16.5438	16.1983	20.5038	17.3911	11.5527	12.8258	19.0025	35.8793	22.281	1.2116	23.4336	12.4401	-0.691407	1.55447	0.417044	1.07509	-0.300653	-0.340961	0.161312	-0.201816	-0.882907	-0.734382	-0.0138343	1.95498	0.368632	-2.08927	0.50309	-0.779385
ALYREF	2538.63	0.00663193	0.093021	0.066766	0.946768	0.999738	3194.2	2560.65	1967.88	1997.74	3178.25	3251.81	4348.09	2517.69	1983.21	2050	1713.87	2057.68	3543.61	2139.68	1921.55	2192.21	0.877628	0.0294777	-0.764089	-0.724103	0.856274	0.954746	2.42238	-0.0280378	-0.743566	-0.654153	-1.10413	-0.643867	1.34539	-0.534088	-0.826101	-0.46376
AMACR	288.725	-0.069188	0.0963847	-0.728154	0.466519	0.999738	359.842	231.017	199.591	205.442	365.802	356.362	479.277	345.814	249.757	286.444	232.415	171.324	401.058	288.36	223.177	223.921	0.819566	-0.665042	-1.0272	-0.959772	0.888246	0.779462	2.19595	0.657905	-0.449071	-0.0262944	-0.648933	-1.35295	1.29454	-0.00420588	-0.755389	-0.746814
AMBP	2.00705	-0.0732376	0.0567186	-1.21299	0.225134	0.999738	2.39895	0	0.667529	0	0	1.34986	3.84447	2.00666	4.95114	1.06882	1.46173	1.79397	1.85675	8.48118	2.23177	0	0.176745	-0.905173	-0.60412	-0.905173	-0.905173	-0.296392	0.828668	-0.000176487	1.32777	-0.423139	-0.245939	-0.0961007	-0.0677855	2.91981	0.101348	-0.905173
AMBRA1	1380.6	-0.0791517	0.0773256	-1.02507	0.305328	0.999738	1365	1519.78	1335.06	1008.32	1376.81	1383.6	1540.35	1427.4	1433.63	1323.73	1355.75	1280.89	1522.53	1360.62	1475.2	1380.85	-0.124822	1.11408	-0.364505	-2.97988	-0.0302854	0.0240736	1.27874	0.374671	0.424505	-0.455161	-0.198865	-0.798079	1.13614	-0.159864	0.757252	0.00200405
AMD1	1012.72	0.0869888	0.09436	0.913925	0.360756	0.999738	1592.9	645.03	799.032	1054.37	1608.43	1362.01	1304.56	747.146	829.591	868.416	898.962	853.031	1273.73	930.507	759.918	675.91	1.83665	-1.16398	-0.676462	0.131833	1.8858	1.10572	0.92385	-0.840715	-0.579725	-0.456819	-0.360119	-0.505522	0.826265	-0.260259	-0.800285	-1.06622
AMDHD1	3.48097	0.0190208	0.0700178	0.289582	0.772136	0.999738	2.39895	0	6.00776	7.0842	0	4.04957	2.56298	6.68887	2.20051	3.20646	5.11604	2.69095	1.85675	2.4232	1.11589	8.29337	-0.432803	-1.39237	1.01071	1.44128	-1.39237	0.227439	-0.367192	1.28315	-0.512179	-0.109803	0.654024	-0.316004	-0.64968	-0.423105	-0.946023	1.92494
AMDHD2	510.363	-0.0338355	0.115344	-0.301325	0.763167	0.999738	518.173	658.008	383.162	260.935	496.314	526.444	918.828	710.358	459.906	430.2	411.476	327.399	782.62	410.732	386.096	485.162	0.0446014	0.843199	-0.726446	-1.42448	-0.0802335	0.0918387	2.33273	1.14216	-0.288162	-0.457813	-0.564743	-1.04491	1.55485	-0.568995	-0.709687	-0.143922
AMER1	249.842	-0.0269821	0.0853782	-0.316976	0.751262	0.999738	250.69	229.719	246.986	227.875	279.407	303.718	230.668	204.679	260.21	258.12	269.689	233.216	288.725	252.012	254.422	207.334	0.0309501	-0.734095	-0.104189	-0.801357	1.07854	1.96543	-0.699469	-1.64755	0.378233	0.301988	0.724025	-0.606535	1.41847	0.0791822	0.167082	-1.5507
AMER2	0.41582	0.00548383	0.0150104	0.422632	0.672563	0.999738	0	5.19139	0	0	0	0	0	0	0	0	1.46173	0	0	0	0	0	-0.313908	3.60514	-0.313908	-0.313908	-0.313908	-0.313908	-0.313908	-0.313908	-0.313908	-0.313908	0.78957	-0.313908	-0.313908	-0.313908	-0.313908	-0.313908
AMER3	0.122921	0.000872342	0.0149914	0.0735935	0.941334	0.999738	0	1.29785	0	0	0	0	0	0.668887	0	0	0	0	0	0	0	0	-0.346284	3.30992	-0.346284	-0.346284	-0.346284	-0.346284	-0.346284	1.53806	-0.346284	-0.346284	-0.346284	-0.346284	-0.346284	-0.346284	-0.346284	-0.346284
AMFR	3424.52	-0.0608239	0.0559001	-1.08949	0.27594	0.999738	3623.61	3460.06	3126.04	2736.86	3297.73	3366.54	3683	3791.92	3662.74	3473.66	3541.76	3091.9	3612.31	3788.67	3189.2	3346.38	0.693281	0.123744	-1.03941	-2.39462	-0.441522	-0.201903	0.900084	1.27937	0.829541	0.171112	0.408263	-1.15829	0.653907	1.26804	-0.819464	-0.272134
AMH	21.1267	-0.0857944	0.0933963	-0.905387	0.365261	0.999738	7.19685	32.4462	18.6908	17.7105	3.6764	9.449	41.0077	24.0799	15.4035	18.1699	30.6963	15.2487	33.4215	14.5392	18.97	37.3202	-1.2668	1.02942	-0.221521	-0.310672	-1.58696	-1.06199	1.80801	0.268574	-0.520471	-0.268891	0.870277	-0.534552	1.11811	-0.599079	-0.196127	1.47267
AMHR2	0.276536	-0.000232981	0.0234812	-0.0356907	0.971529	0.999738	1.19947	0	0	0	0	0	0	0.668887	0	0	0.730863	0.896983	0.928375	0	0	0	2.11248	-0.632953	-0.632953	-0.632953	-0.632953	-0.632953	-0.632953	0.898034	-0.632953	-0.632953	1.03989	1.42011	1.49197	-0.632953	-0.632953	-0.632953
AMIGO1	32.9497	-0.0261179	0.115036	-0.200123	0.841384	0.999738	23.9895	70.0837	49.3972	30.6982	7.3528	10.7989	19.2223	31.4377	28.0565	29.9269	24.1185	49.3341	19.4959	19.3856	61.3737	52.5247	-0.49043	2.03249	0.900231	-0.123236	-1.40102	-1.2124	-0.751355	-0.0827621	-0.267829	-0.16545	-0.483369	0.896777	-0.736383	-0.742421	1.55575	1.07141
AMIGO3	291.118	-0.206384	0.0861525	-2.39647	0.0165539	0.999738	257.887	320.568	267.012	265.658	226.099	252.423	316.528	293.641	283.865	275.221	281.382	291.519	382.49	277.456	324.723	341.41	-0.864331	0.766009	-0.626999	-0.66222	-1.69115	-1.00644	0.66092	0.0656371	-0.188635	-0.413475	-0.253214	0.0104497	2.37661	-0.355345	0.874065	1.30812
AMMECR1	829.1	0.0963901	0.0723053	1.33443	0.182064	0.999738	712.488	939.641	959.239	1174.8	718.737	653.331	806.057	837.446	772.378	750.845	771.061	956.184	736.201	757.249	843.609	876.333	-0.901416	0.854492	1.00599	2.67226	-0.853113	-1.3587	-0.178123	0.0645175	-0.438465	-0.60491	-0.448643	0.982368	-0.718111	-0.555414	0.112159	0.365116
AMMECR1L	1060.32	0.102267	0.0814177	1.26284	0.206645	0.999738	1007.56	992.853	1278.99	1335.37	1007.33	990.795	926.517	844.804	1041.94	1047.44	1102.87	1252.19	875.457	822.675	1285.5	1152.78	-0.32643	-0.417419	1.35296	1.70184	-0.327819	-0.43015	-0.827857	-1.33344	-0.113706	-0.0796566	0.263305	1.18716	-1.14378	-1.47035	1.39326	0.572084
AMN	4.56554	-0.055582	0.0625883	-0.879979	0.378871	0.999738	0	5.19139	4.00517	3.5421	5.5146	8.09914	0	10.0333	3.30076	3.74087	5.11604	0	14.854	2.4232	4.46354	2.76446	-1.18185	0.16201	-0.145056	-0.264929	0.245678	0.914718	-1.18185	1.4154	-0.327403	-0.213476	0.142506	-1.18185	2.66329	-0.554571	-0.0264027	-0.466231
AMN1	100.945	-0.0457035	0.114116	-0.393632	0.693852	0.999738	89.9606	59.701	142.851	133.419	93.7482	80.9914	66.6374	75.5842	94.6218	115.967	113.284	118.402	83.5537	127.218	118.284	100.903	-0.450494	-1.69147	1.7186	1.33178	-0.295159	-0.818327	-1.407	-1.04008	-0.259335	0.616047	0.506013	0.715903	-0.713246	1.07746	0.711066	-0.0017488
AMOT	211.272	-0.143901	0.0944278	-1.5331	0.125251	0.999738	209.908	134.976	166.215	175.924	238.966	213.277	179.408	200.666	264.061	265.602	255.802	180.294	201.457	285.937	225.409	182.454	-0.0325288	-1.8192	-1.07435	-0.842833	0.660329	0.0478106	-0.759757	-0.252896	1.25868	1.29542	1.06177	-0.738654	-0.234027	1.7803	0.337069	-0.687136
AMOTL1	4239.65	-0.000430588	0.0929934	0.018931	0.984896	0.999738	3046.67	5543.1	6963	6679.22	2821.64	2717.26	2288.74	2197.29	2593.85	2904.52	3072.55	7535.55	2286.59	2770.92	7958.49	6455.01	-0.551372	0.602429	1.25867	1.12752	-0.655375	-0.703616	-0.90167	-0.943935	-0.760656	-0.617071	-0.539409	1.5233	-0.902665	-0.678814	1.71877	1.02389
AMOTL2	4018.86	0.0403758	0.0956188	0.4197	0.674704	0.999738	4024.24	4664.46	3541.24	3065.1	4082.64	3929.43	5337.4	5063.47	3651.19	3906	4248.51	3416.61	4355.93	3694.16	3695.81	3625.59	0.0089275	1.07224	-0.793255	-1.58406	0.105933	-0.148526	2.1899	1.73494	-0.610648	-0.187448	0.38141	-1.00025	0.559826	-0.539279	-0.536539	-0.653173
AMPD1	0.121404	-0.00326984	0.0149914	-0.238346	0.811613	0.999738	0	0	0	0	0	0	0	0	0	0	0.730863	0	0	1.2116	0	0	-0.353789	-0.353789	-0.353789	-0.353789	-0.353789	-0.353789	-0.353789	-0.353789	-0.353789	-0.353789	1.77606	-0.353789	-0.353789	3.17699	-0.353789	-0.353789
AMPD2	3448.67	-0.0511914	0.0914651	-0.552377	0.58069	0.999738	2595.66	4856.54	4236.14	2995.44	2400.69	2590.38	3205	3568.51	3442.69	3141.79	3106.9	4053.47	2640.3	3227.7	4463.54	4653.96	-1.08885	1.79713	1.0052	-0.578547	-1.33773	-1.0956	-0.311036	0.152975	-0.00763043	-0.391723	-0.436264	0.772016	-1.03188	-0.28207	1.29547	1.53855
AMPD3	989.9	0.0588141	0.0973159	0.636536	0.524427	0.999738	543.362	1406.87	1706.87	1508.93	579.033	616.885	690.723	589.958	650.8	589.454	782.755	1715.03	631.295	431.329	1840.09	1555.01	-0.860323	0.803348	1.38136	0.999999	-0.791597	-0.71867	-0.57641	-0.770549	-0.653328	-0.77152	-0.399096	1.39708	-0.690907	-1.07617	1.63803	1.08877
AMPH	30.4117	-0.112734	0.11429	-1.0187	0.308345	0.999738	28.7874	6.48923	13.3506	7.0842	40.4404	49.9447	51.2596	26.0866	41.8096	52.9065	34.3506	10.7638	53.8457	47.2523	11.1589	11.0578	-0.0893177	-1.31541	-0.938133	-1.2827	0.551441	1.07405	1.14635	-0.237826	0.626728	1.23691	0.216583	-1.08037	1.28855	0.926003	-1.05865	-1.0642
AMT	102.281	-0.12794	0.105213	-1.2401	0.214937	0.999738	76.7664	48.0203	40.7193	38.9631	130.512	86.3909	125.586	147.155	172.19	166.736	152.75	49.3341	116.047	187.798	54.6784	42.8491	-0.478248	-1.01707	-1.15392	-1.18684	0.529171	-0.297846	0.436832	0.841125	1.31038	1.20815	0.946007	-0.992443	0.258029	1.60293	-0.892268	-1.114
AMTN	0.643152	-0.0220269	0.026048	-0.31212	0.75495	0.999738	0	0	0.667529	1.1807	0	0	0	0	0	1.06882	0	1.79397	0	0	5.57943	0	-0.449475	-0.449475	0.0170359	0.375672	-0.449475	-0.449475	-0.449475	-0.449475	-0.449475	0.297482	-0.449475	0.80426	-0.449475	-0.449475	3.44977	-0.449475
AMY2B	16.177	-0.108473	0.10278	-1.05363	0.292054	0.999738	8.39632	7.78708	14.0181	11.807	25.7348	20.2479	7.68894	9.36441	13.203	19.7732	20.4642	19.7336	8.35537	20.5972	26.7812	24.8801	-1.13672	-1.22573	-0.315406	-0.638437	1.39634	0.594727	-1.24006	-0.995286	-0.434484	0.525375	0.62633	0.5196	-1.1427	0.645758	1.54922	1.27147
AMZ1	55.9606	-0.0123993	0.113741	-0.0811081	0.935356	0.999738	33.5853	153.146	83.4411	67.2999	38.6022	25.6473	29.4743	43.4776	37.4086	21.9108	33.6197	86.1104	60.3444	23.0204	78.112	80.1693	-0.645925	2.80553	0.793303	0.327342	-0.501097	-0.875077	-0.764601	-0.360355	-0.535554	-0.982941	-0.644931	0.870357	0.12655	-0.950911	0.639461	0.698851
AMZ2	894.67	0.0776394	0.0740136	1.04374	0.296606	0.999738	1115.51	760.538	724.269	753.287	1012.85	1066.39	1305.84	884.937	885.704	1005.22	893.115	640.446	965.51	976.548	652.793	671.763	1.18017	-0.716797	-0.910619	-0.75555	0.631546	0.917655	2.19727	-0.0520127	-0.047915	0.590802	-0.00830827	-1.35857	0.378567	0.437554	-1.29259	-1.19121
AMZ2P1	46.9013	0.153094	0.115054	1.33539	0.18175	0.999738	45.58	51.9139	43.3894	64.9385	45.955	41.8456	46.1336	48.1598	57.2132	48.6313	50.4296	42.1582	29.708	48.4639	22.3177	63.5825	-0.123452	0.468364	-0.328139	1.68535	-0.0884136	-0.472389	-0.0717267	0.117597	0.963514	0.161647	0.329676	-0.443178	-1.60649	0.146009	-2.29702	1.55865
ANAPC1	1492.55	-0.0845739	0.111636	-0.76338	0.445237	0.999738	2100.28	876.047	1350.41	1492.4	1996.29	1954.59	1286.62	882.261	1340.11	1387.33	1463.92	1532.94	1671.07	1594.46	1674.94	1277.18	1.74932	-1.77459	-0.409151	-0.000427891	1.44998	1.32996	-0.592786	-1.7567	-0.438808	-0.30289	-0.082422	0.116261	0.513865	0.293341	0.525002	-0.619947
ANAPC10	75.1374	0.0193368	0.115378	0.171179	0.864083	0.999738	71.9685	42.8289	85.4437	110.986	73.528	89.0906	53.8225	46.8221	78.118	80.6958	93.5505	77.1405	68.6997	70.2727	91.5026	67.7292	-0.179615	-1.83122	0.584151	2.03186	-0.0912202	0.790852	-1.20811	-1.60489	0.168933	0.315045	1.04364	0.113533	-0.364885	-0.275732	0.927562	-0.419893
ANAPC11	1477.85	0.0950051	0.11533	0.827602	0.407896	0.999738	1295.43	2304.98	1361.76	1053.18	1354.75	1313.41	2506.59	2187.93	1318.65	1310.37	1186.19	1149.93	1783.41	1137.69	1014.34	1367.02	-0.395067	1.7913	-0.251424	-0.919703	-0.266595	-0.356131	2.22794	1.53781	-0.344778	-0.362712	-0.63165	-0.710177	0.661738	-0.736689	-1.00383	-0.240022
ANAPC13	903.769	-0.00514668	0.114745	-0.048405	0.961393	0.999738	1069.93	471.118	919.855	879.622	1086.38	971.897	585.641	674.907	1021.58	1036.75	1153.3	998.342	710.207	1132.84	819.06	928.858	0.82551	-2.14945	0.0799187	-0.119965	0.907213	0.338468	-1.58049	-1.13701	0.585322	0.660686	1.23971	0.469848	-0.961634	1.13807	-0.420842	0.124644
ANAPC15	400.587	0.0291586	0.0712972	0.407205	0.683858	0.999738	524.17	338.738	367.809	371.921	487.123	512.946	480.558	402.67	347.13	387.981	346.429	308.562	479.041	365.902	312.448	375.966	1.71756	-0.85958	-0.455558	-0.398409	1.20268	1.56156	1.11144	0.0289429	-0.74295	-0.175196	-0.752686	-1.27896	1.09036	-0.482048	-1.22496	-0.342182
ANAPC16	491.543	0.0809327	0.0732756	1.10534	0.26901	0.999738	389.829	594.414	529.351	489.991	419.11	399.558	499.781	527.751	500.065	499.139	587.614	525.632	404.771	479.793	489.874	528.011	-1.65046	1.66925	0.613493	-0.0251857	-1.17534	-1.4926	0.133677	0.587545	0.138289	0.123255	1.55891	0.553152	-1.408	-0.190662	-0.0270842	0.591762
ANAPC1P1	0.160554	0.00182213	0.0149914	0.0928889	0.925992	0.999738	0	0	0	0	0	1.34986	0	0.668887	0.550127	0	0	0	0	0	0	0	-0.423125	-0.423125	-0.423125	-0.423125	-0.423125	3.13429	-0.423125	1.33966	1.02668	-0.423125	-0.423125	-0.423125	-0.423125	-0.423125	-0.423125	-0.423125
ANAPC2	1591.51	-0.0500198	0.114323	-0.443319	0.657535	0.999738	1511.34	2064.87	1357.09	913.862	1514.68	1480.79	2601.42	2034.75	1582.71	1345.11	1266.59	1268.33	1730.49	1674.43	1490.82	1626.88	-0.205297	1.21213	-0.600286	-1.73524	-0.196746	-0.283512	2.58606	1.135	-0.022526	-0.630957	-0.832028	-0.827553	0.355882	0.212324	-0.257831	0.090577
ANAPC4	295.633	-0.010218	0.112006	-0.0959919	0.923527	0.999738	345.449	151.848	273.019	354.21	369.478	349.613	263.987	232.104	311.372	301.407	312.81	293.313	254.375	344.094	303.521	269.535	0.900752	-2.5999	-0.408901	1.05917	1.33525	0.976051	-0.572227	-1.14873	0.284577	0.104398	0.310578	-0.0419486	-0.746032	0.876252	0.142619	-0.471913
ANAPC5	2570.07	-0.0580267	0.0648558	-0.894065	0.371287	0.999738	2568.07	2372.46	2748.88	2487.74	2466.87	2556.63	2147.78	2373.88	2541.03	2565.7	2741.47	2816.53	2289.37	2739.42	2903.53	2801.78	-0.00945489	-0.935839	0.846833	-0.389932	-0.488767	-0.0636588	-1.99993	-0.92914	-0.137515	-0.020701	0.811713	1.16717	-1.32935	0.80202	1.57922	1.09733
ANAPC7	907.969	-0.0336601	0.063537	-0.531068	0.595372	0.999738	1086.72	778.708	761.651	964.632	1115.79	997.544	1008.53	872.897	865.899	844.367	800.295	801.903	1046.28	925.661	842.493	814.133	1.55968	-1.12784	-1.27667	0.494399	1.81328	0.78157	0.877439	-0.306014	-0.367072	-0.554945	-0.939481	-0.925458	1.20679	0.154363	-0.571295	-0.818748
ANG	91.2412	0.0293808	0.115092	0.266063	0.790191	0.999738	40.7821	202.464	101.464	99.1788	29.4112	18.898	62.793	119.062	99.0228	92.9873	108.168	113.917	42.7052	95.7162	88.1549	145.134	-1.09456	2.41265	0.221764	0.172184	-1.34122	-1.56927	-0.617099	0.603487	0.168799	0.0378766	0.367173	0.491881	-1.05284	0.0970731	-0.0669468	1.16905
ANGEL1	420.149	0.0346364	0.0940963	0.369546	0.71172	0.999738	287.874	554.181	497.977	340.042	319.847	307.767	365.224	531.096	526.471	448.37	496.987	384.806	306.364	467.677	461.976	425.726	-1.46555	1.48502	0.862299	-0.887557	-1.11131	-1.24514	-0.608542	1.22925	1.17801	0.312673	0.851335	-0.39159	-1.2607	0.526587	0.463431	0.0617955
ANGEL2	445.629	0.0198025	0.0969904	0.202871	0.839236	0.999738	556.556	365.993	425.884	520.689	545.946	529.144	395.98	319.059	423.047	429.665	420.977	454.77	436.336	465.253	438.543	402.229	1.69748	-1.21866	-0.302166	1.14861	1.53511	1.278	-0.759769	-1.93687	-0.345568	-0.244295	-0.377244	0.13988	-0.142214	0.300301	-0.108445	-0.664152
ANGPT1	339.265	0.000849806	0.114611	-0.0154585	0.987666	0.999738	382.632	81.7643	170.887	220.791	367.64	336.114	215.29	333.774	582.584	669.081	553.264	217.967	195.887	735.44	207.555	157.574	0.219945	-1.30597	-0.853965	-0.600868	0.143909	-0.0159803	-0.628767	-0.0278484	1.23404	1.67273	1.08534	-0.615191	-0.727174	2.00928	-0.667999	-0.921486
ANGPT2	18.1664	0.00192971	0.0973849	0.0707142	0.943625	0.999738	20.3911	20.7655	16.6882	27.1561	42.2786	8.09914	5.12596	14.0466	13.7532	11.757	14.6173	20.6306	33.4215	6.05799	23.4336	12.4401	0.223695	0.26135	-0.148634	0.903934	2.42454	-1.01229	-1.31125	-0.414253	-0.443761	-0.644479	-0.356873	0.247781	1.53393	-1.21753	0.529627	-0.575797
ANGPTL1	60.2871	0.0770505	0.112103	0.725947	0.467872	0.999738	23.9895	37.6376	100.129	125.154	42.2786	39.1459	12.8149	42.1399	77.5678	66.8012	80.395	79.8315	22.281	56.9451	81.4596	76.0226	-1.17729	-0.734623	1.29226	2.10392	-0.584093	-0.685702	-1.53973	-0.588594	0.560489	0.21128	0.652186	0.633909	-1.2327	-0.108396	0.686716	0.51037
ANGPTL2	3447.83	0.0544504	0.0851102	0.664856	0.506143	0.999738	1603.7	6363.34	6270.1	4740.51	1599.23	1906	1960.68	2390.6	2285.78	2403.77	2128.27	5920.09	1353.57	2417.14	5656.42	6166.12	-0.932459	1.47418	1.42704	0.653623	-0.934716	-0.779606	-0.751957	-0.534574	-0.587577	-0.527913	-0.667215	1.25006	-1.05893	-0.521156	1.11674	1.37446
ANGPTL3	2.84329	0.0425148	0.0503456	1.07654	0.281687	0.999738	4.7979	2.59569	1.33506	4.7228	12.8674	1.34986	0	0	0	1.60323	1.46173	8.07285	5.57025	0	1.11589	0	0.543452	-0.0688409	-0.419343	0.522572	2.78707	-0.415229	-0.790538	-0.790538	-0.790538	-0.344782	-0.384125	1.45401	0.758193	-0.790538	-0.480281	-0.790538
ANGPTL4	993.142	-0.0641707	0.115255	-0.481634	0.630066	0.999738	873.217	2053.19	1129.46	902.055	711.384	820.713	1234.07	575.242	382.338	305.148	312.079	1410.06	797.474	279.879	1968.42	2135.54	-0.192957	1.7056	0.219331	-0.146558	-0.453344	-0.277435	0.387655	-0.672393	-0.982773	-1.10697	-1.09582	0.670808	-0.314827	-1.14763	1.56921	1.8381
ANGPTL5	0.637755	-0.0337523	0.036957	-0.947949	0.343155	0.999738	0	0	1.33506	0	0	0	0	1.33777	0.550127	1.06882	1.46173	0	1.85675	1.2116	0	1.38223	-0.903609	-0.903609	0.987981	-0.903609	-0.903609	-0.903609	-0.903609	0.991827	-0.124157	0.610757	1.16745	-0.903609	1.72714	0.813054	-0.903609	1.05481
ANGPTL6	10.1295	0.174666	0.100894	1.79285	0.0729966	0.999738	16.7926	15.5742	5.34023	12.9877	5.5146	14.8484	12.8149	7.35775	8.80202	8.55055	9.50123	16.1457	3.7135	6.05799	11.1589	6.91114	1.56013	1.27483	-1.12136	0.669232	-1.08053	1.10491	0.62877	-0.648972	-0.310808	-0.369688	-0.147096	1.40865	-1.50224	-0.9533	0.241022	-0.753541
ANGPTL7	12.1656	-0.00702398	0.0984577	-0.0498729	0.960224	0.999738	17.9921	11.6806	7.34282	8.2649	29.4112	16.1983	11.5334	12.7088	4.95114	3.74087	11.6938	11.6608	25.0661	8.48118	11.1589	2.76446	0.808035	-0.0672562	-0.668831	-0.540955	2.39166	0.559263	-0.0876727	0.0753398	-1.00051	-1.16836	-0.0654264	-0.0700082	1.78907	-0.510961	-0.139616	-1.30377
ANK1	11.9687	-0.118176	0.104809	-1.11773	0.263684	0.999738	14.3937	7.78708	13.3506	5.9035	9.191	4.04957	15.3779	14.0466	12.6529	8.55055	11.6938	14.3517	8.35537	14.5392	23.4336	13.8223	0.524304	-0.904106	0.298774	-1.31135	-0.600565	-1.71219	0.737092	0.449263	0.147931	-0.739037	-0.0594345	0.51523	-0.781237	0.555758	2.47881	0.400761
ANK2	155.203	-0.0093887	0.114362	-0.0752595	0.940008	0.999738	158.331	96.0407	172.223	198.358	139.703	126.887	94.8302	125.751	171.639	185.975	196.602	175.809	98.4077	239.896	161.803	140.987	0.0762916	-1.44294	0.41511	1.05254	-0.378024	-0.690619	-1.47246	-0.718323	0.40089	0.750517	1.00972	0.502574	-1.38521	2.06565	0.160989	-0.346706
ANK3	1113.7	-0.0616986	0.115202	-0.464321	0.642418	0.999738	437.808	1051.26	1938.5	2007.19	415.433	423.855	242.201	546.48	902.207	920.253	1040.02	2113.29	308.22	833.579	2645.76	1993.17	-0.876539	-0.0809842	1.06965	1.15873	-0.905556	-0.894634	-1.13021	-0.735607	-0.274279	-0.250876	-0.0955572	1.29633	-1.0446	-0.36328	1.98687	1.14055
ANKAR	16.7109	-0.0610436	0.101907	-0.645926	0.518327	0.999738	21.5905	2.59569	14.6856	10.6263	29.4112	32.3966	11.5334	9.36441	18.7043	18.1699	13.1555	15.2487	12.0689	24.232	15.6224	17.969	0.646682	-1.87064	-0.268401	-0.806372	1.68313	2.07877	-0.686157	-0.973606	0.264179	0.193359	-0.47118	-0.19378	-0.615193	0.99674	-0.144257	0.166728
ANKDD1A	46.1661	-0.0769199	0.114351	-0.668562	0.503775	0.999738	31.1863	59.701	68.088	56.6736	36.764	22.9476	37.1632	43.4776	39.6091	39.5463	52.6222	47.5401	56.6309	33.9247	60.2578	52.5247	-1.19855	1.08294	1.754	0.840721	-0.752269	-1.85774	-0.720331	-0.215105	-0.52463	-0.529655	0.516561	0.109938	0.8373	-0.979443	1.1275	0.508761
ANKDD1B	2.45491	-0.0105304	0.062179	-0.115642	0.907936	0.999738	1.19947	5.19139	4.6727	0	3.6764	2.69971	3.84447	2.67555	2.20051	0.53441	1.46173	0.896983	5.57025	2.4232	2.23177	0	-0.713112	1.55438	1.25975	-1.39444	0.693833	0.139055	0.789298	0.125327	-0.144506	-1.09088	-0.564147	-0.884933	1.76958	-0.0180137	-0.126747	-1.39444
ANKEF1	49.1389	-0.142633	0.115147	-1.34403	0.178939	0.999738	76.7664	10.3828	3.33765	7.0842	62.4988	101.239	83.2968	55.5176	70.4162	69.4732	58.4691	7.17586	78.9118	73.9075	11.1589	16.5867	0.821909	-1.15299	-1.36258	-1.25112	0.397454	1.54997	1.01619	0.189764	0.632993	0.604941	0.27757	-1.24839	0.885737	0.736857	-1.1299	-0.968419
ANKFY1	2395	-0.155238	0.0926877	-1.67868	0.0932139	0.999738	2655.64	1643.07	2285.62	2082.75	2645.17	2490.49	1947.86	2082.24	2545.44	2534.7	2601.14	2383.28	2410.06	2825.45	2787.48	2399.55	0.814343	-2.34931	-0.341739	-0.97557	0.781644	0.298347	-1.39702	-0.977167	0.47003	0.436502	0.644083	-0.0365981	0.0470645	1.34489	1.22628	0.014222
ANKH	5190.92	-0.0633354	0.0947001	-0.646509	0.51795	0.999738	1873.58	4674.84	6077.18	5525.68	1926.43	1717.02	1741.54	6203.25	8952.21	7790.62	7465.04	5782.85	1368.42	9168.16	6238.91	6549	-1.2385	-0.192673	0.330878	0.124978	-1.21877	-1.29695	-1.28779	0.377945	1.40424	0.970575	0.849021	0.22099	-1.42709	1.48487	0.391258	0.507026
ANKHD1	1091.03	0.026275	0.0796826	0.327048	0.743632	0.999738	1313.42	952.62	970.587	1081.52	1398.87	1220.27	1175.13	929.083	1034.24	1145.24	969.856	1061.13	1086.2	1234.62	985.326	898.449	1.52588	-0.949709	-0.826427	-0.0652761	2.11215	0.886726	0.576971	-1.1112	-0.389701	0.371915	-0.831446	-0.205182	-0.0331854	0.985165	-0.725297	-1.32139
ANKHD1-EIF4EBP3	912.974	-0.176192	0.112639	-1.55718	0.119428	0.999738	770.063	526.926	945.889	897.332	772.044	1102.83	659.967	713.702	794.933	906.893	1081.68	1151.73	866.174	1050.46	1317.86	1049.11	-0.695459	-1.87865	0.160174	-0.07612	-0.685815	0.923923	-1.23122	-0.969731	-0.574432	-0.0295929	0.820974	1.16185	-0.227749	0.669032	1.97032	0.662494
ANKIB1	2057.34	-0.0792758	0.0938548	-0.843389	0.399011	0.999738	2108.68	1632.69	2066	2356.68	2194.81	2101.73	1617.24	1596.63	1965.6	2199.63	2099.04	2237.08	1843.75	2293.55	2373.49	2230.92	0.19944	-1.64992	0.0336385	1.16301	0.534106	0.172442	-1.70996	-1.79002	-0.356451	0.552825	0.162	0.698314	-0.82988	0.917754	1.22832	0.674387
ANKK1	3.34199	-0.0117395	0.0676492	-0.0164454	0.986879	0.999738	1.19947	10.3828	5.34023	8.2649	0	1.34986	3.84447	0	0	1.06882	2.19259	5.3819	5.57025	0	3.34766	5.52891	-0.673749	2.21409	0.62838	1.54809	-1.05094	-0.626458	0.158012	-1.05094	-1.05094	-0.714835	-0.361447	0.641482	0.700712	-1.05094	0.00178167	0.687714
ANKLE1	54.8512	0.17722	0.112576	1.54753	0.121735	0.999738	62.3727	32.4462	28.7038	24.7947	69.8516	52.6444	56.3855	105.684	77.0177	75.3517	79.6641	43.0552	56.6309	63.0031	27.8971	22.1157	0.31604	-0.941415	-1.09866	-1.26292	0.630292	-0.0927223	0.0644715	2.1359	0.931397	0.861396	1.04259	-0.495645	0.0747797	0.342528	-1.13256	-1.37548
ANKLE2	3789.04	0.0190016	0.0848875	0.224392	0.822452	0.999738	3897.09	4685.23	3599.98	3422.85	4112.06	3768.8	4958.08	3945.76	3181.38	3276.46	3100.32	3657.9	4287.23	3237.39	3603.19	3890.97	0.204154	1.69331	-0.357222	-0.691912	0.610318	-0.0382486	2.20886	0.296112	-1.14816	-0.9685	-1.30131	-0.2478	0.941312	-1.04233	-0.35116	0.192592
ANKMY1	148.888	-0.0120409	0.109984	-0.0954882	0.923927	0.999738	82.7637	268.654	198.924	140.503	93.7482	85.041	108.927	177.255	137.532	129.327	123.516	188.366	97.4793	124.795	175.194	250.183	-1.17261	2.12387	0.887304	-0.148689	-0.977817	-1.13223	-0.708653	0.503043	-0.201387	-0.346882	-0.449934	0.700087	-0.911652	-0.427259	0.466494	1.79631
ANKMY2	373.976	-0.0112768	0.0776684	-0.147119	0.883038	0.999738	395.827	286.824	347.783	386.089	431.977	375.26	388.291	336.45	379.037	405.082	425.363	345.338	382.49	421.636	334.766	341.41	0.55463	-2.21222	-0.664888	0.307455	1.47225	0.0325873	0.363357	-0.952551	0.128457	0.789574	1.30435	-0.726932	0.216111	1.20976	-0.995307	-0.826636
ANKRA2	248.95	0.185792	0.0871487	2.13035	0.0331424	0.999738	181.121	321.866	289.708	264.477	169.114	191.68	249.89	309.694	286.066	277.893	282.113	257.434	172.678	245.954	215.366	268.152	-1.38699	1.49099	0.833409	0.317486	-1.6325	-1.17108	0.0192211	1.2421	0.75894	0.591821	0.678119	0.173475	-1.55964	-0.0612645	-0.686742	0.392644
ANKRD1	3.11636	-0.0033389	0.0584935	0.292269	0.770081	0.999738	0	6.48923	3.33765	10.6263	0	0	0	0.668887	0	2.13764	0	10.7638	0	0	8.92708	6.91114	-0.749803	0.811522	0.0532424	1.80691	-0.749803	-0.749803	-0.749803	-0.588868	-0.749803	-0.235482	-0.749803	1.83999	-0.749803	-0.749803	1.39807	0.913035
ANKRD10	1123.33	0.0325243	0.0919547	0.350324	0.726096	0.999738	670.506	1201.81	1057.37	883.164	733.442	846.36	908.576	1969.87	1575.56	1474.97	1362.33	993.857	806.758	1472.09	944.039	1072.61	-1.26459	0.219152	-0.18422	-0.670708	-1.08883	-0.773487	-0.59974	2.3641	1.26293	0.982008	0.66744	-0.361579	-0.884084	0.973967	-0.500705	-0.14165
ANKRD11	7332.19	-0.020298	0.084266	-0.2416	0.80909	0.999738	7127.28	8455.47	6628.56	6591.85	7134.06	7089.45	9202.37	8460.75	6920.59	6989.54	6610.66	6590.13	8528.05	6955.78	7066.9	6963.67	-0.246663	1.35211	-0.846975	-0.89117	-0.238501	-0.292197	2.25117	1.35846	-0.495455	-0.412457	-0.868526	-0.893235	1.43947	-0.453096	-0.319341	-0.443603
ANKRD12	796.088	0.0767522	0.114949	0.66115	0.508516	0.999738	1003.96	391.95	688.222	962.271	1064.32	881.457	597.174	589.289	891.205	960.334	1004.21	812.666	788.19	924.449	648.329	529.394	1.04243	-2.02667	-0.540924	0.833367	1.34511	0.428104	-0.997513	-1.03705	0.476989	0.823656	1.04367	0.0831353	-0.0396085	0.6437	-0.74098	-1.33742
ANKRD13A	1459.18	-0.00700603	0.0810383	-0.0897625	0.928476	0.999738	2361.77	1135.62	1287	1174.8	2174.59	2001.84	1641.59	1012.03	1127.21	1162.34	1194.23	1405.57	1967.23	1178.88	1333.48	1188.72	2.10173	-0.753439	-0.400941	-0.662204	1.66588	1.26361	0.424748	-1.04123	-0.773015	-0.691209	-0.61695	-0.124829	1.18302	-0.652686	-0.292694	-0.629791
ANKRD13B	410.218	-0.127256	0.111434	-1.12834	0.259177	0.999738	255.488	630.754	491.969	303.44	242.643	259.173	411.358	466.214	435.15	390.653	346.429	420.685	287.796	478.581	555.711	587.447	-1.27154	1.81231	0.67181	-0.87748	-1.3771	-1.24126	0.0093674	0.460161	0.204885	-0.160779	-0.524203	0.086014	-1.00604	0.561792	1.19563	1.45643
ANKRD13C	1211.74	-0.0305934	0.0772575	-0.39441	0.693279	0.999738	1104.72	1511.99	1234.26	1172.44	1136.01	1060.99	1353.25	1266.87	1125.56	1145.24	1045.13	1240.53	1259.8	1165.56	1192.88	1372.55	-0.871343	2.44464	0.183396	-0.319984	-0.616567	-1.22737	1.15221	0.4489	-0.701644	-0.541405	-1.35645	0.234413	0.391364	-0.375985	-0.153516	1.30935
ANKRD13D	932.799	0.0383424	0.0972678	0.395335	0.692595	0.999738	784.456	1240.74	971.922	845.381	759.177	765.369	1020.07	1204	1005.63	910.099	887.268	872.764	904.237	843.272	902.751	1007.64	-1.06288	2.20643	0.280325	-0.626351	-1.24401	-1.19964	0.625273	1.94315	0.521852	-0.16264	-0.326228	-0.430149	-0.204646	-0.641464	-0.215293	0.536278
ANKRD16	178.2	0.0110561	0.111383	0.0888441	0.929206	0.999738	158.331	292.016	138.179	82.649	143.38	176.831	297.305	282.939	189.244	149.635	165.906	91.4922	234.879	138.122	136.138	174.161	-0.300315	1.72023	-0.604899	-1.44418	-0.526288	-0.020692	1.80018	1.58304	0.166909	-0.431748	-0.185819	-1.31053	0.856651	-0.605751	-0.63574	-0.0610543
ANKRD17	3922.43	-0.019542	0.114522	-0.17004	0.864979	0.999738	4474.04	2381.55	3879.68	4675.57	4729.69	4412.68	2759.05	2439.43	3847.03	4147.55	4339.87	4627.53	3224.25	4245.44	4991.35	3584.12	0.666676	-1.8623	-0.0516651	0.910247	0.975654	0.59252	-1.40606	-1.79234	-0.0911188	0.272085	0.504516	0.852189	-0.843819	0.390389	1.2919	-0.408877
ANKRD18A	3.00961	-0.0473494	0.0683768	-0.637322	0.523915	0.999738	0	1.29785	6.67529	7.0842	0	0	3.84447	0.668887	1.10025	3.74087	2.92345	4.48491	1.85675	3.63479	6.69531	4.14669	-1.23361	-0.701634	1.50253	1.67014	-1.23361	-1.23361	0.342201	-0.959438	-0.782625	0.299736	-0.0353135	0.604714	-0.472545	0.256257	1.51073	0.466077
ANKRD18B	27.1203	0.000434577	0.105244	0.0255662	0.979603	0.999738	65.9711	9.08493	13.3506	5.9035	69.8516	95.8399	38.4447	10.0333	5.50127	6.41291	4.38518	9.86681	76.1267	8.48118	2.23177	12.4401	1.23945	-0.575383	-0.439296	-0.67688	1.36325	2.19235	0.361279	-0.545127	-0.689712	-0.660628	-0.725318	-0.550438	1.56345	-0.594644	-0.794018	-0.468344
ANKRD18DP	0.161208	0.000872342	0.0149914	0.0735937	0.941334	0.999738	0	1.29785	0	0	0	0	1.28149	0	0	0	0	0	0	0	0	0	-0.365954	2.58025	-0.365954	-0.365954	-0.365954	-0.365954	2.54311	-0.365954	-0.365954	-0.365954	-0.365954	-0.365954	-0.365954	-0.365954	-0.365954	-0.365954
ANKRD19P	9.30107	-0.0561602	0.102548	-0.553315	0.580048	0.999738	5.99737	9.08493	9.34541	5.9035	9.191	5.39943	7.68894	15.3844	7.15164	11.2226	12.4247	9.86681	11.1405	18.174	6.69531	4.14669	-0.880427	-0.057602	0.0118151	-0.905443	-0.0293327	-1.03978	-0.42963	1.62119	-0.572816	0.512082	0.832432	0.150768	0.490201	2.3646	-0.694428	-1.37363
ANKRD2	20.1755	0.136843	0.102713	1.28918	0.197335	0.999738	21.5905	9.08493	5.34023	3.5421	18.382	14.8484	30.7557	63.5442	41.8096	39.5463	21.195	2.69095	11.1405	29.0783	3.34766	6.91114	0.0824702	-0.646363	-0.864605	-0.969401	-0.104525	-0.310463	0.616622	2.52755	1.26085	1.12894	0.0594202	-1.01901	-0.526563	0.518863	-0.980734	-0.773052
ANKRD20A1	1.43293	0.0317078	0.0327962	1.34143	0.179781	0.999738	1.19947	0	2.00259	9.4456	3.6764	0	0	0	1.65038	3.74087	0	0	0	1.2116	0	0	-0.0934989	-0.573885	0.228145	3.20905	0.898503	-0.573885	-0.573885	-0.573885	0.0870872	0.924321	-0.573885	-0.573885	-0.573885	-0.0886436	-0.573885	-0.573885
ANKRD20A12P	2.9079	0.00205127	0.0696237	0.101737	0.918965	0.999738	5.99737	1.29785	3.33765	4.7228	3.6764	2.69971	5.12596	0.668887	0.550127	0.53441	3.65432	2.69095	3.7135	1.2116	1.11589	5.52891	1.66595	-0.868191	0.231736	0.978657	0.414404	-0.112258	1.19605	-1.20735	-1.27139	-1.27986	0.402495	-0.116985	0.434408	-0.9147	-0.966311	1.41334
ANKRD20A2	1.48426	-0.0363941	0.0297185	-0.65553	0.512126	0.999738	0	2.59569	0	2.3614	0	0	0	0	1.65038	0	3.65432	0	0	1.2116	12.2747	0	-0.476927	0.35713	-0.476927	0.281846	-0.476927	-0.476927	-0.476927	-0.476927	0.0533788	-0.476927	0.697291	-0.476927	-0.476927	-0.087612	3.46723	-0.476927
ANKRD20A3	0.601457	0.00819441	0.0150987	0.554082	0.579522	0.999738	0	0	0	0	0	0	0	3.34443	0	0	0	6.27888	0	0	0	0	-0.347942	-0.347942	-0.347942	-0.347942	-0.347942	-0.347942	-0.347942	1.58681	-0.347942	-0.347942	-0.347942	3.28438	-0.347942	-0.347942	-0.347942	-0.347942
ANKRD20A4	1.35733	-0.00727398	0.0225141	0.103006	0.917958	0.999738	0	0	6.67529	3.5421	0	0	0	0	0	3.20646	0	0	0	0	0	8.29337	-0.508942	-0.508942	1.99402	0.819201	-0.508942	-0.508942	-0.508942	-0.508942	-0.508942	0.693348	-0.508942	-0.508942	-0.508942	-0.508942	-0.508942	2.60073
ANKRD20A5P	3.9216	0.0637365	0.062195	1.04011	0.298288	0.999738	0	2.59569	1.33506	9.4456	0	0	0	3.34443	7.70177	7.48173	15.3481	6.27888	0	3.63479	5.57943	0	-0.880591	-0.29773	-0.580805	1.24041	-0.880591	-0.880591	-0.880591	-0.129601	0.848836	0.799427	2.56582	0.529327	-0.880591	-0.0644012	0.372265	-0.880591
ANKRD20A8P	0.351236	0.00431801	0.0149993	0.316639	0.751517	0.999738	0	0	0	4.7228	0	0	0	0	0	0	0	0.896983	0	0	0	0	-0.295896	-0.295896	-0.295896	3.68278	-0.295896	-0.295896	-0.295896	-0.295896	-0.295896	-0.295896	-0.295896	0.459758	-0.295896	-0.295896	-0.295896	-0.295896
ANKRD20A9P	3.97843	0.00897229	0.0711652	0.149582	0.881094	0.999738	2.39895	5.19139	3.33765	3.5421	9.191	0	6.40745	6.01998	2.75063	0.53441	5.84691	3.58793	7.427	2.4232	2.23177	2.76446	-0.632695	0.485879	-0.256679	-0.17478	2.08802	-1.59365	0.972998	0.81779	-0.49182	-1.37958	0.748462	-0.156421	1.3814	-0.622982	-0.699662	-0.486282
ANKRD22	3.67753	0.0811364	0.0738504	1.10814	0.267801	0.999738	1.19947	5.19139	3.33765	2.3614	5.5146	2.69971	7.68894	6.68887	1.65038	2.67205	8.0395	2.69095	1.85675	3.63479	2.23177	1.38223	-1.10405	0.674475	-0.151429	-0.586378	0.818478	-0.435648	1.78721	1.34165	-0.903161	-0.447974	1.9434	-0.439554	-0.811217	-0.0190397	-0.644133	-1.02263
ANKRD23	66.9181	0.101224	0.114123	0.902891	0.366584	0.999738	62.3727	131.083	53.4023	48.4087	71.6898	59.3937	110.208	82.273	54.4625	46.4936	47.5061	64.5828	79.8402	41.1943	62.4896	55.2891	-0.187765	2.65056	-0.558321	-0.764602	0.197116	-0.310823	1.78826	0.634297	-0.514525	-0.843711	-0.801886	-0.0964691	0.5338	-1.06262	-0.182937	-0.480378
ANKRD24	16.592	-0.103839	0.111764	-0.981434	0.326379	0.999738	11.9947	11.6806	4.00517	7.0842	16.5438	22.9476	17.9408	32.1066	20.9048	22.9796	23.3876	6.27888	23.2094	26.6551	6.69531	11.0578	-0.546218	-0.58354	-1.49549	-1.12966	-0.00572663	0.755129	0.160261	1.84334	0.51242	0.758935	0.807414	-1.22534	0.786233	1.19564	-1.17586	-0.657537
ANKRD26	222.348	0.00382246	0.109284	0.0353949	0.971765	0.999738	256.688	73.9773	203.596	376.643	336.391	256.473	124.304	109.697	202.997	246.363	248.494	237.7	191.245	227.78	239.915	225.303	0.450876	-1.9481	-0.246207	2.02589	1.49737	0.448057	-1.2873	-1.47909	-0.254081	0.315313	0.34329	0.201577	-0.408378	0.0713267	0.230658	0.0388029
ANKRD26P1	0.156083	0.000872342	0.0149914	0.0735937	0.941334	0.999738	1.19947	1.29785	0	0	0	0	0	0	0	0	0	0	0	0	0	0	2.44425	2.67469	-0.365638	-0.365638	-0.365638	-0.365638	-0.365638	-0.365638	-0.365638	-0.365638	-0.365638	-0.365638	-0.365638	-0.365638	-0.365638	-0.365638
ANKRD27	727.674	0.0508824	0.0686687	0.741856	0.458175	0.999738	914	698.242	706.913	815.864	761.015	758.62	739.419	596.647	668.954	640.223	659.239	839.576	769.623	633.666	727.557	713.23	2.2565	-0.356443	-0.251424	1.06802	0.403777	0.374767	0.14224	-1.58681	-0.711132	-1.05908	-0.828785	1.35519	0.508017	-1.13849	-0.00141762	-0.174925
ANKRD28	1524.66	-0.0392731	0.11506	-0.338588	0.73492	0.999738	1727.24	813.75	1630.11	2000.11	1827.17	1661.67	1071.32	919.05	1408.87	1499.55	1558.93	1916.85	1430.63	1724.1	1720.69	1484.51	0.597582	-2.09706	0.311044	1.40248	0.892353	0.404165	-1.33726	-1.78644	-0.341551	-0.0740633	0.101093	1.15689	-0.277388	0.58832	0.578265	-0.118427
ANKRD29	79.9719	-0.0784006	0.108662	-0.770928	0.44075	0.999738	173.924	6.48923	6.00776	7.0842	150.732	152.534	124.304	96.3197	100.673	87.1088	88.4345	5.3819	168.036	100.563	7.8112	4.14669	1.45242	-1.13598	-1.14342	-1.12678	1.0939	1.12175	0.685343	0.252723	0.320024	0.11033	0.130824	-1.1531	1.36139	0.318315	-1.11554	-1.17219
ANKRD30B	1.54704	0.0562833	0.0462841	1.3385	0.180732	0.999738	0	6.48923	1.33506	4.7228	0	0	0	0	1.10025	0.53441	0	8.07285	0	0	1.11589	1.38223	-0.606097	1.93624	-0.0830515	1.24419	-0.606097	-0.606097	-0.606097	-0.606097	-0.175043	-0.396727	-0.606097	2.55666	-0.606097	-0.606097	-0.168919	-0.0645712
ANKRD30BL	0.382669	-0.000176882	0.0164334	-0.09494	0.924363	0.999738	0	0	0	0	0	1.34986	3.84447	0	0	0	0	0	0.928375	0	0	0	-0.381135	-0.381135	-0.381135	-0.381135	-0.381135	0.963312	3.44792	-0.381135	-0.381135	-0.381135	-0.381135	-0.381135	0.543519	-0.381135	-0.381135	-0.381135
ANKRD31	0.89038	-0.0343852	0.0334781	-0.884481	0.376436	0.999738	3.59842	0	1.33506	0	0	0	0	0.668887	0	1.60323	0	0	0.928375	0	3.34766	2.76446	2.10713	-0.692807	0.346005	-0.692807	-0.692807	-0.692807	-0.692807	-0.172345	-0.692807	0.554669	-0.692807	-0.692807	0.0295635	-0.692807	1.91201	1.45822
ANKRD33	1.54205	-0.0333237	0.0498778	-0.807269	0.419511	0.999738	0	0	0	1.1807	0	1.34986	1.28149	2.00666	4.95114	4.80969	1.46173	0	2.78512	4.84639	0	0	-0.829279	-0.829279	-0.829279	-0.194325	-0.829279	-0.103356	-0.140123	0.249858	1.83333	1.75726	-0.043195	-0.829279	0.668498	1.777	-0.829279	-0.829279
ANKRD33B	27.91	0.114638	0.114966	0.981368	0.326411	0.999738	20.3911	31.1483	17.3558	17.7105	33.0876	18.898	30.7557	50.8354	46.2106	35.271	39.4666	15.2487	17.6391	30.2899	25.6654	16.5867	-0.67677	0.291473	-0.949973	-0.918043	0.466026	-0.811158	0.256137	2.06347	1.64721	0.662551	1.04019	-1.13962	-0.924468	0.214211	-0.20204	-1.01919
ANKRD34A	124.854	0.110521	0.115389	0.949684	0.342273	0.999738	89.9606	198.571	104.802	100.36	45.955	95.8399	124.304	223.408	165.588	143.756	161.521	114.814	108.62	132.064	103.777	84.3159	-0.776374	1.64022	-0.446148	-0.544996	-1.75551	-0.645559	-0.0122167	2.19286	0.906351	0.420587	0.815854	-0.223385	-0.361202	0.160438	-0.468949	-0.901968
ANKRD35	213.02	-0.0070281	0.115095	-0.0775923	0.938152	0.999738	167.926	275.144	150.862	119.251	196.687	187.63	344.721	359.192	228.303	247.966	198.795	112.123	276.656	216.876	150.644	175.543	-0.619918	0.854039	-0.854515	-1.28908	-0.224528	-0.349043	1.81054	2.00949	0.210097	0.480419	-0.195557	-1.38707	0.874827	0.0530114	-0.8575	-0.515209
ANKRD36	551.172	0.0291012	0.11539	0.234162	0.81486	0.999738	658.512	216.74	302.391	597.434	1141.52	626.334	580.515	503.003	567.18	546.701	651.93	398.26	738.986	640.935	370.474	277.828	0.486819	-1.51675	-1.1283	0.209815	2.67742	0.340883	0.133079	-0.218461	0.0726049	-0.0202757	0.456971	-0.693499	0.851796	0.407105	-0.819519	-1.2397
ANKRD36B	403.785	0.0725731	0.114839	0.622164	0.533834	0.999738	496.582	170.018	181.568	363.656	803.294	534.543	456.21	430.094	412.595	432.872	450.212	252.052	699.066	456.772	160.687	160.339	0.494211	-1.24497	-1.18346	-0.213717	2.12766	0.696379	0.2792	0.140114	0.0469186	0.154907	0.247255	-0.808083	1.57258	0.282194	-1.29466	-1.29652
ANKRD36BP1	178.741	-0.0140504	0.109338	-0.131062	0.895726	0.999738	199.113	67.488	166.215	281.007	251.834	202.479	96.1117	88.293	186.493	210.557	225.837	160.56	162.466	255.647	184.121	121.636	0.329286	-1.79827	-0.202472	1.653	1.18145	0.38369	-1.3356	-1.46198	0.1253	0.514274	0.761248	-0.293875	-0.263073	1.2431	0.086962	-0.923032
ANKRD36C	364.757	0.124989	0.112558	1.10736	0.268137	0.999738	358.643	297.207	269.682	432.136	588.224	363.112	439.551	466.214	344.379	311.561	368.355	299.592	541.242	308.957	239.915	207.334	-0.0580914	-0.641847	-0.903387	0.640232	2.12336	-0.0156305	0.710684	0.964033	-0.193623	-0.505459	0.0341935	-0.619182	1.67694	-0.530196	-1.18622	-1.4958
ANKRD37	37.22	0.195762	0.114783	1.7043	0.0883244	0.999738	21.5905	51.9139	50.7322	36.6017	47.7932	17.5481	30.7557	42.1399	45.6605	42.2184	40.1975	42.1582	25.9945	26.6551	33.4766	40.0846	-1.51463	1.42395	1.30944	-0.059922	1.02463	-1.90637	-0.626443	0.47677	0.817949	0.484377	0.288539	0.478547	-1.08785	-1.02382	-0.362774	0.277602
ANKRD39	238.701	0.130285	0.112509	1.15811	0.24682	0.999738	285.475	384.163	242.981	166.479	216.908	228.126	308.839	274.912	228.853	226.055	191.486	213.482	260.873	203.548	185.237	201.805	0.85906	2.67159	0.0785939	-1.32647	-0.40027	-0.194233	1.28817	0.665064	-0.180885	-0.232263	-0.86717	-0.463189	0.407217	-0.645632	-0.981947	-0.677644
ANKRD40	1470.18	-0.041401	0.100151	-0.41292	0.679665	0.999738	1680.46	1040.87	1597.4	1671.87	1713.2	1627.93	1249.45	1044.8	1313.15	1453.59	1482.19	1584.07	1464.05	1469.67	1612.45	1517.69	1.00281	-2.04728	0.606682	0.961836	1.15894	0.752277	-1.0526	-2.02855	-0.748829	-0.0790877	0.0572866	0.543136	-0.0292402	-0.00243424	0.678485	0.22656
ANKRD44	218.029	-0.0515653	0.112121	-0.44057	0.659525	0.999738	212.307	125.891	215.612	229.056	202.202	86.3909	49.9781	210.699	347.68	300.338	291.615	259.228	119.76	390.134	244.379	203.188	-0.0625745	-1.00766	-0.0264305	0.120598	-0.173086	-1.43965	-1.83788	-0.0801573	1.41793	0.900176	0.80477	0.450576	-1.07471	1.88223	0.288178	-0.162308
ANKRD44-IT1	1.28873	0.0410628	0.0434032	1.05715	0.290442	0.999738	1.19947	0	0	2.3614	1.8382	1.34986	0	0	1.10025	2.13764	2.92345	5.3819	0	1.2116	1.11589	0	-0.0614474	-0.887232	-0.887232	0.738486	0.378287	0.0420843	-0.887232	-0.887232	-0.129757	0.584436	1.12544	2.81796	-0.887232	-0.0531012	-0.118995	-0.887232
ANKRD45	3.67034	0.0606973	0.0680437	1	0.317308	0.999738	8.39632	1.29785	2.00259	2.3614	16.5438	2.69971	3.84447	0.668887	2.20051	2.67205	0.730863	5.3819	7.427	0	1.11589	1.38223	1.13029	-0.567419	-0.398869	-0.313053	3.07889	-0.23214	0.0416451	-0.717844	-0.351534	-0.238757	-0.703022	0.409345	0.898462	-0.877819	-0.610938	-0.547237
ANKRD46	89.2487	-0.0468758	0.115141	-0.3988	0.69004	0.999738	73.1679	57.1053	105.47	119.251	99.2628	80.9914	42.2891	63.5442	103.424	86.0399	93.5505	120.196	72.4132	104.197	93.7343	113.343	-0.705893	-1.41099	0.712046	1.31699	0.43959	-0.362467	-2.06137	-1.12834	0.622242	-0.140853	0.188837	1.35848	-0.739023	0.656201	0.196906	1.05765
ANKRD49	64.9248	0.00713219	0.111929	0.0677949	0.945949	0.999738	82.7637	27.2548	65.4179	114.528	86.3954	63.4433	39.7262	40.8021	54.4625	78.0238	55.5456	70.8616	47.3471	77.5422	66.9531	67.7292	0.840163	-1.77415	0.0232221	2.33616	1.01121	-0.0697741	-1.18678	-1.13611	-0.492742	0.616925	-0.441731	0.279609	-0.827857	0.594246	0.095528	0.13208
ANKRD50	2082.45	-0.0746069	0.115173	-0.624669	0.532188	0.999738	2001.92	1258.91	2561.31	3128.86	2154.37	1968.09	999.562	1035.44	1653.68	1900.36	1837.39	3174.42	1436.2	2035.48	3386.71	2786.57	-0.107729	-1.10167	0.640571	1.39979	0.0962041	-0.152985	-1.4486	-1.40061	-0.573579	-0.243591	-0.327826	1.46074	-0.864512	-0.0628337	1.74472	0.94191
ANKRD52	5721.68	-0.0489587	0.068072	-0.714225	0.475088	0.999738	5095.37	7680.66	6896.91	5845.65	4926.38	5093.01	5838.46	4751.1	4626.01	4727.92	4446.57	6917.53	5417.99	4502.3	7936.17	6844.8	-0.534465	1.67171	1.00289	0.105789	-0.678673	-0.536476	0.0996612	-0.828247	-0.934991	-0.848028	-1.08812	1.02049	-0.25915	-1.04057	1.88975	0.95842
ANKRD53	29.8731	0.0581691	0.115145	0.473698	0.635715	0.999738	38.3832	14.2763	16.6882	17.7105	27.573	29.6969	19.2223	64.882	44.0101	46.4936	35.0814	21.5276	28.7796	43.6175	18.97	11.0578	0.581038	-1.0649	-0.900223	-0.830425	-0.157045	-0.0120359	-0.727202	2.39029	0.965227	1.13479	0.355606	-0.569807	-0.0746623	0.938421	-0.744428	-1.28465
ANKRD54	718.006	0.0226072	0.115401	0.198269	0.842835	0.999738	711.288	1164.17	576.078	480.545	661.752	737.022	1234.07	879.586	582.584	571.818	498.449	580.348	894.025	529.468	605.926	780.959	-0.0298125	1.98015	-0.629903	-1.0539	-0.249663	0.0843982	2.29041	0.717123	-0.601027	-0.648807	-0.974434	-0.610951	0.781206	-0.836765	-0.497432	0.2794
ANKRD55	0.939845	-0.0322712	0.0362536	-0.696687	0.485999	0.999738	0	2.59569	0.667529	1.1807	0	0	0	0	2.75063	1.06882	0	0	0.928375	0	4.46354	1.38223	-0.715955	1.26139	-0.207445	0.183479	-0.715955	-0.715955	-0.715955	-0.715955	1.37942	0.09825	-0.715955	-0.715955	-0.00873779	-0.715955	2.68428	0.336999
ANKRD6	10.6385	-0.00373564	0.0817868	-0.0120108	0.990417	0.999738	1.19947	11.6806	12.6831	29.5175	16.5438	5.39943	1.28149	3.34443	2.20051	4.80969	10.2321	27.8065	11.1405	4.84639	17.8542	9.6756	-1.08238	0.119507	0.234457	2.16488	0.677175	-0.600765	-1.07297	-0.836414	-0.96759	-0.668392	-0.046598	1.96868	0.0575702	-0.664183	0.827434	-0.110411
ANKRD60	1.89359	-0.0273407	0.0565057	-0.400814	0.688557	0.999738	0	2.59569	2.00259	8.2649	0	2.69971	1.28149	0.668887	1.10025	0	0	2.69095	2.78512	1.2116	2.23177	2.76446	-0.936217	0.34713	0.0538903	3.15007	-0.936217	0.39856	-0.302631	-0.60551	-0.392236	-0.936217	-0.936217	0.394226	0.440787	-0.337186	0.167202	0.43057
ANKRD61	20.96	-0.109199	0.114599	-0.967627	0.333231	0.999738	19.1916	10.3828	11.348	18.8912	34.9258	31.0467	25.6298	22.7421	13.7532	18.7043	24.8494	15.2487	29.708	24.232	16.7383	17.969	-0.249728	-1.49364	-1.35734	-0.292147	1.97214	1.42436	0.659426	0.251654	-1.0177	-0.318535	0.54922	-0.806513	1.23532	0.462034	-0.596168	-0.422378
ANKRD62	0.414863	0.00186172	0.0198481	0.175801	0.86045	0.999738	0	3.89354	0	0	0	0	1.28149	0	0	0.53441	0	0	0.928375	0	0	0	-0.412185	3.45622	-0.412185	-0.412185	-0.412185	-0.412185	0.861031	-0.412185	-0.412185	0.118774	-0.412185	-0.412185	0.510196	-0.412185	-0.412185	-0.412185
ANKRD62P1-PARP4P3	0.137037	0.00184503	0.0149922	0.100423	0.920008	0.999738	0	0	0	0	0	0	0	0	0	0	2.19259	0	0	0	0	0	-0.25	-0.25	-0.25	-0.25	-0.25	-0.25	-0.25	-0.25	-0.25	-0.25	3.75	-0.25	-0.25	-0.25	-0.25	-0.25
ANKRD65	33.5536	0.00439355	0.108914	-0.0017957	0.998567	0.999738	44.3806	14.2763	12.6831	5.9035	42.2786	62.0934	85.8598	55.5176	39.6091	26.7205	20.4642	7.17586	60.3444	44.8291	7.8112	6.91114	0.442849	-0.788493	-0.853662	-1.13096	0.356875	1.16735	2.13946	0.898383	0.247685	-0.279494	-0.535393	-1.07892	1.09581	0.461196	-1.05293	-1.08975
ANKRD7	2.79406	0.10571	0.0663879	1.55456	0.120052	0.999738	5.99737	0	1.33506	0	7.3528	8.09914	2.56298	2.67555	2.20051	3.74087	5.84691	0.896983	2.78512	1.2116	0	0	1.18678	-1.03516	-0.540537	-1.03516	1.68895	1.96546	-0.0856106	-0.0439059	-0.219901	0.35078	1.13104	-0.702837	-0.003309	-0.586277	-1.03516	-1.03516
ANKRD9	1363.26	0.0460009	0.103976	0.424568	0.671152	0.999738	1131.1	2029.83	797.03	533.676	1005.5	1186.52	3080.7	2944.44	1400.07	1201.89	1031.98	670.943	1903.17	1217.66	714.166	963.413	-0.306128	0.878987	-0.746658	-1.09393	-0.471763	-0.233048	2.26472	2.08504	0.0485485	-0.21279	-0.43684	-0.912923	0.71196	-0.191996	-0.855927	-0.527255
ANKS1A	1081.57	-0.147371	0.0704649	-2.09261	0.036384	0.999738	1005.16	1134.32	984.605	857.188	1025.72	935.451	1203.32	1173.23	1145.36	1074.7	1111.64	996.548	1143.76	1275.81	1161.64	1076.76	-0.704764	0.486441	-0.894332	-2.06948	-0.515175	-1.34767	1.12282	0.84529	0.58831	-0.0634281	0.277316	-0.784188	0.573499	1.79142	0.738392	-0.0444427
ANKS1B	9.55105	-0.10095	0.0974735	-1.11817	0.263495	0.999738	4.7979	2.59569	6.67529	4.7228	18.382	6.74929	5.12596	16.7222	8.80202	16.5667	16.8099	2.69095	8.35537	15.7508	11.1589	6.91114	-0.859866	-1.25825	-0.520237	-0.873451	1.59756	-0.506851	-0.800518	1.29729	-0.135502	1.26916	1.31315	-1.24102	-0.216303	1.12156	0.290859	-0.47757
ANKS3	630.015	0.0183021	0.114963	0.165761	0.868345	0.999738	526.569	1096.68	560.724	474.641	476.094	518.345	1031.6	873.566	526.471	480.969	453.135	553.438	649.862	507.659	584.724	765.755	-0.508776	2.29521	-0.34079	-0.764174	-0.757029	-0.549225	1.97512	1.19786	-0.509259	-0.733055	-0.869947	-0.376625	0.0976171	-0.601781	-0.222754	0.667612
ANKS4B	0.175932	-0.00166953	0.0176419	-0.107163	0.91466	0.999738	0	0	0.667529	0	0	0	0	0.668887	0.550127	0	0	0	0.928375	0	0	0	-0.545143	-0.545143	1.52326	-0.545143	-0.545143	-0.545143	-0.545143	1.52747	1.15948	-0.545143	-0.545143	-0.545143	2.33152	-0.545143	-0.545143	-0.545143
ANKS6	1055.68	0.0302319	0.0841556	0.365444	0.71478	0.999738	833.635	1617.12	1192.87	1086.24	841.896	830.162	1038.01	997.979	947.868	918.116	1022.48	1230.66	829.039	945.046	1337.95	1221.89	-1.01517	2.56677	0.627207	0.139712	-0.977404	-1.03105	-0.080823	-0.263822	-0.492919	-0.628942	-0.151816	0.799958	-1.03619	-0.50582	1.29045	0.759861
ANKZF1	465.643	-0.0105417	0.0985131	-0.107633	0.914287	0.999738	392.228	555.478	446.577	396.715	384.184	449.502	611.27	526.414	504.466	452.645	449.481	409.921	406.628	545.219	438.543	481.016	-1.1051	1.35228	-0.286998	-1.03756	-1.22619	-0.242961	2.19211	0.914773	0.584397	-0.195658	-0.243284	-0.838773	-0.888343	1.19785	-0.407935	0.231401
ANLN	4756.98	0.0224603	0.114466	0.166668	0.867631	0.999738	8991.26	1572.99	2719.51	3497.23	8654.25	8050.55	5143.9	3084.24	4484.63	4836.41	4945.02	3328.7	6404.86	5104.46	2954.86	2338.73	1.87037	-1.40643	-0.899989	-0.556454	1.72151	1.45484	0.170912	-0.738884	-0.1203	0.0350864	0.0830642	-0.630897	0.727903	0.153492	-0.79603	-1.06819
ANO1	3.6256	-0.0727059	0.076637	-0.836449	0.402902	0.999738	0	5.19139	6.00776	3.5421	0	0	0	5.35109	6.60152	3.20646	2.19259	5.3819	0	9.69278	6.69531	4.14669	-1.19745	0.517143	0.786772	-0.0275776	-1.19745	-1.19745	-1.19745	0.569889	0.982875	-0.138432	-0.473289	0.580064	-1.19745	2.00385	1.01385	0.172103
ANO1-AS2	0.448988	-0.0148678	0.0254215	-0.282427	0.777616	0.999738	0	0	1.33506	0	0	0	0	1.33777	0	0	0	0.896983	0	0	2.23177	1.38223	-0.613176	-0.613176	1.21009	-0.613176	-0.613176	-0.613176	-0.613176	1.2138	-0.613176	-0.613176	-0.613176	0.611819	-0.613176	-0.613176	2.43472	1.27451
ANO10	1303.9	-0.0285383	0.100705	-0.280456	0.779128	0.999738	1251.05	1052.55	1499.27	1428.65	1261.01	1212.17	766.331	1133.09	1479.84	1451.46	1461	1471.05	1059.28	1536.31	1411.59	1387.76	-0.247135	-1.17537	0.91361	0.583354	-0.200587	-0.42895	-2.51384	-0.798742	0.82275	0.690017	0.734628	0.781652	-1.14394	1.0868	0.503612	0.392143
ANO2	0.185833	-0.00634342	0.0149921	-0.396071	0.692052	0.999738	0	0	0	0	0	0	0	0	0.550127	0	0	0	0	2.4232	0	0	-0.303545	-0.303545	-0.303545	-0.303545	-0.303545	-0.303545	-0.303545	-0.303545	0.59505	-0.303545	-0.303545	-0.303545	-0.303545	3.65458	-0.303545	-0.303545
ANO3	56.2361	-0.0861534	0.113637	-0.738191	0.460398	0.999738	32.3858	25.9569	67.4204	94.456	42.2786	37.796	23.0668	35.451	63.2645	71.0765	73.0863	76.2435	38.9917	87.235	64.7213	66.347	-1.06485	-1.35188	0.499348	1.70641	-0.62316	-0.823296	-1.48091	-0.927994	0.3138	0.662579	0.752314	0.893274	-0.76991	1.38401	0.378841	0.451421
ANO4	29.2781	-0.0138904	0.0954562	-0.317636	0.750761	0.999738	46.7795	0	0	0	14.7056	40.4957	15.3779	41.471	66.5653	72.1453	61.3925	0	22.281	87.235	0	0	0.577072	-0.965379	-0.965379	-0.965379	-0.480494	0.369878	-0.458328	0.402034	1.22946	1.41345	1.0589	-0.965379	-0.230713	1.911	-0.965379	-0.965379
ANO5	0.300626	-0.00119648	0.0149938	-0.263127	0.792453	0.999738	3.59842	0	0	0	0	0	0	0	0	0	0	0	0	1.2116	0	0	3.54641	-0.32329	-0.32329	-0.32329	-0.32329	-0.32329	-0.32329	-0.32329	-0.32329	-0.32329	-0.32329	-0.32329	-0.32329	0.979648	-0.32329	-0.32329
ANO6	2341.85	-0.00457951	0.104304	-0.0363049	0.971039	0.999738	2213.03	1865.01	2660.1	2960.02	2393.34	2184.07	1776.14	1654.16	2268.72	2392.02	2368.73	2986.06	1625.58	2492.26	2910.23	2720.23	-0.289348	-1.07104	0.714807	1.38843	0.115633	-0.354398	-1.27062	-1.54462	-0.164262	0.112668	0.0603597	1.44692	-1.60879	0.337811	1.2766	0.849847
ANO8	1279.2	-0.0445862	0.111985	-0.400162	0.689037	0.999738	996.763	1820.88	1229.59	839.478	847.411	1051.54	1387.85	1820.71	1498.54	1328.01	1248.31	1138.27	1330.36	1307.31	1233.05	1389.14	-0.998052	1.91413	-0.175318	-1.55385	-1.52582	-0.804492	0.383941	1.91353	0.775092	0.172466	-0.109145	-0.498006	0.180781	0.0993401	-0.163075	0.388489
ANO9	0.603919	-0.0121217	0.0348558	-0.303261	0.761691	0.999738	0	0	0.667529	0	0	0	1.28149	0.668887	0.550127	0	1.46173	1.79397	1.85675	0	0	1.38223	-0.842064	-0.842064	0.0886938	-0.842064	-0.842064	-0.842064	0.944758	0.0905865	-0.0750044	-0.842064	1.19607	1.65932	1.74686	-0.842064	-0.842064	1.08522
ANOS1	2.13921	0.0556494	0.0515376	1.17517	0.239925	0.999738	0	2.59569	0.667529	0	1.8382	0	10.2519	2.00666	6.05139	2.67205	2.92345	1.79397	0.928375	0	1.11589	1.38223	-0.804673	0.171709	-0.553579	-0.804673	-0.113226	-0.804673	3.05163	-0.049859	1.47159	0.20043	0.294997	-0.129865	-0.455461	-0.804673	-0.384928	-0.284742
ANP32A	975.644	0.0778526	0.0966762	0.800998	0.423133	0.999738	1235.46	712.518	883.809	1212.58	1147.04	1174.38	1348.13	700.993	848.295	922.925	904.809	891.601	1147.47	919.603	752.107	808.604	1.27184	-1.28805	-0.449553	1.15984	0.838998	0.972824	1.82337	-1.34447	-0.623397	-0.258069	-0.346752	-0.411408	0.841121	-0.274335	-1.09426	-0.817693
ANP32A-IT1	36.4846	-0.00267268	0.111431	-0.00778829	0.993786	0.999738	41.9816	22.0634	24.6986	53.1315	66.1752	39.1459	32.0372	37.4576	23.1053	20.842	38.7358	36.7763	72.4132	25.4435	29.013	20.7334	0.349573	-0.917091	-0.749512	1.05863	1.88812	0.169238	-0.282823	0.0618792	-0.850832	-0.994766	0.143159	0.0185499	2.28482	-0.702136	-0.475143	-1.00167
ANP32AP1	1.79487	-0.070289	0.0594585	-1.05391	0.291925	0.999738	2.39895	0	2.67012	1.1807	1.8382	1.34986	1.28149	0.668887	0.550127	2.13764	0	3.58793	2.78512	2.4232	4.46354	1.38223	0.485393	-1.44224	0.703284	-0.493507	0.0348145	-0.357584	-0.41252	-0.904765	-1.00019	0.275421	-1.44224	1.44078	0.795696	0.504875	2.14435	-0.331573
ANP32B	1667.6	0.140085	0.0846627	1.6502	0.0989019	0.999738	2095.48	1401.67	1546.66	2007.19	1832.69	2038.28	1978.62	1583.92	1471.59	1586.66	1580.86	1519.49	2045.21	1530.25	1216.31	1246.77	1.4712	-0.914362	-0.415832	1.16762	0.567613	1.27453	1.06938	-0.287724	-0.673973	-0.278308	-0.298265	-0.509273	1.29834	-0.472281	-1.5517	-1.44698
ANP32E	2168.34	0.126618	0.105554	1.19057	0.233823	0.999738	2920.72	1480.84	1708.21	2682.55	2957.67	2788.8	3411.32	1691.61	1743.9	2166.5	1815.46	1773.34	2403.56	2200.26	1411.59	1537.04	1.21169	-1.10719	-0.741027	0.828129	1.27119	0.999248	2.0018	-0.767749	-0.683542	-0.00296347	-0.568291	-0.636139	0.378825	0.0514141	-1.21871	-1.01669
ANPEP	23183.7	-0.0320683	0.0778357	-0.409508	0.682167	0.999738	18936.1	24461.8	26414.8	20821.6	16178	18786	19503	24193.6	25649.1	24873.6	27623	26746.2	18116.3	23038.5	30375.5	25221.5	-1.05839	0.318484	0.80512	-0.58856	-1.74564	-1.0958	-0.917139	0.251658	0.614327	0.421081	1.10617	0.887707	-1.26267	-0.0361652	1.79204	0.507786
ANTXR1	6860.33	0.0253099	0.0752286	0.34866	0.727345	0.999738	3632.01	11310.7	10230.6	10036	3840	3698.61	4340.4	6260.78	5847.84	6174.57	5704.39	9004.81	3304.09	6862.49	8942.7	10575.4	-1.16233	1.60232	1.21341	1.14335	-1.08744	-1.13835	-0.907276	-0.215864	-0.364537	-0.246904	-0.416187	0.772097	-1.28039	0.0007755	0.749736	1.33758
ANTXR2	10839.4	0.0637049	0.110083	0.600704	0.548037	0.999738	7491.92	20407.3	13325.9	13787	7409.79	7054.35	12753.4	10420.6	7865.16	7610.53	7463.58	13064.6	8648.74	6743.75	14015.5	15367.6	-0.845114	2.41559	0.627763	0.744187	-0.865849	-0.955584	0.483225	-0.105726	-0.750883	-0.815169	-0.852269	0.561786	-0.553056	-1.034	0.801871	1.14323
ANXA1	6819.25	0.0051847	0.114362	0.0729113	0.941877	0.999738	6780.63	3962.33	9677.84	10853	6850.97	6006.86	3057.63	3124.37	5512.27	6253.13	6434.52	11435.6	4369.86	5942.89	9464.94	9381.19	-0.0146062	-1.0804	1.08102	1.52543	0.0119962	-0.307219	-1.42252	-1.39728	-0.494259	-0.214091	-0.145493	1.74576	-0.92628	-0.331413	1.00051	0.968839
ANXA10	235.44	0.115805	0.109176	1.10489	0.269207	0.999738	193.115	336.142	393.842	382.547	191.173	136.336	153.779	104.346	140.832	122.914	179.792	426.964	99.3361	135.699	340.345	429.873	-0.339613	0.808043	1.27103	1.1804	-0.3552	-0.795217	-0.655253	-1.0519	-0.759135	-0.902911	-0.446517	1.5368	-1.0921	-0.800326	0.841765	1.56014
ANXA11	4639.49	-0.0706685	0.074266	-0.951899	0.341148	0.999738	4694.74	5012.28	4748.13	3705.04	3874.93	4681.3	4158.43	5175.18	4939.04	4683.57	4574.47	4668.8	4860.97	4657.38	4828.43	4969.11	0.137504	0.927711	0.270369	-2.3254	-1.90262	0.104062	-1.19712	1.33307	0.745431	0.109687	-0.161787	0.0729329	0.551161	0.0445277	0.470197	0.820276
ANXA13	0.183489	0.00278075	0.014994	0.177659	0.85899	0.999738	1.19947	0	0.667529	0	0	0	0	0	0	1.06882	0	0	0	0	0	0	2.49463	-0.450535	1.1885	-0.450535	-0.450535	-0.450535	-0.450535	-0.450535	-0.450535	2.17382	-0.450535	-0.450535	-0.450535	-0.450535	-0.450535	-0.450535
ANXA2	27605.8	-0.0681022	0.102383	-0.669465	0.503199	0.999738	36622.4	17023.9	26024.3	26598.8	36786.1	33819.3	24645.6	19923.5	25661.2	26242.7	26553.7	28575.2	31406.9	27968.5	26840.4	27000.5	1.7232	-2.02237	-0.302252	-0.192452	1.75449	1.1875	-0.565741	-1.46822	-0.371644	-0.260507	-0.201067	0.185263	0.726451	0.0693205	-0.146284	-0.115692
ANXA2P1	3.62874	-0.00549602	0.0672453	-0.11919	0.905125	0.999738	10.7953	0	5.34023	0	3.6764	10.7989	1.28149	3.34443	2.75063	1.60323	3.65432	0.896983	6.49862	2.4232	2.23177	2.76446	2.17834	-1.10299	0.520225	-1.10299	0.0144863	2.17943	-0.713472	-0.086419	-0.266911	-0.615676	0.00777352	-0.830346	0.872329	-0.366439	-0.424624	-0.262708
ANXA2P2	234.856	0.0341377	0.115384	0.283741	0.776609	0.999738	388.63	111.615	254.329	214.887	306.98	329.365	235.794	110.366	236.554	255.982	257.995	192.851	219.096	222.934	196.396	223.921	2.18958	-1.75483	0.27727	-0.284332	1.02697	1.34571	0.0133569	-1.77261	0.024184	0.300816	0.329473	-0.598103	-0.2244	-0.169757	-0.547634	-0.155702
ANXA2P3	1.27741	0.0594918	0.0451659	1.60909	0.107597	0.999738	2.39895	0	2.67012	3.5421	3.6764	1.34986	0	0.668887	1.10025	0	2.92345	0.896983	0	1.2116	0	0	0.833822	-0.949711	1.03543	1.68371	1.78356	0.0538601	-0.949711	-0.452417	-0.131712	-0.949711	1.22377	-0.282836	-0.949711	-0.048931	-0.949711	-0.949711
ANXA2R	30.2364	0.0493636	0.114352	0.436051	0.6628	0.999738	51.5774	24.6591	19.3583	34.2403	33.0876	35.0963	39.7262	28.0932	28.0565	34.2022	24.1185	18.8366	62.2011	19.3856	20.0859	11.0578	1.63823	-0.428139	-0.835047	0.307355	0.21887	0.373064	0.728474	-0.16452	-0.167343	0.304431	-0.469638	-0.875095	2.45375	-0.832958	-0.779194	-1.47223
ANXA3	49.9495	-0.0262595	0.115291	-0.256578	0.797504	0.999738	74.3674	19.4677	24.6986	37.7824	79.0426	55.3441	48.6966	44.1465	61.6142	70.5421	78.9333	17.0427	54.7741	86.0234	30.1289	16.5867	1.02363	-1.27784	-1.05855	-0.510059	1.21962	0.226152	-0.0525218	-0.243267	0.489	0.863269	1.21504	-1.3795	0.202256	1.51227	-0.830904	-1.39861
ANXA4	593.409	-0.0160063	0.096559	-0.162673	0.870776	0.999738	575.748	498.373	638.158	592.711	553.298	575.039	490.81	491.632	644.748	692.06	591.999	701.441	412.198	708.785	646.097	681.439	-0.201795	-1.08589	0.51131	-0.00796583	-0.458303	-0.209892	-1.1723	-1.16292	0.586614	1.12721	-0.0161016	1.23439	-2.07053	1.3183	0.602029	1.00584
ANXA5	12358.8	0.0116827	0.0920957	0.128538	0.897723	0.999738	14363.7	10969.4	13915.3	14592.3	13595.3	13674.1	11364.2	8579.14	10794.6	10909.4	10766.3	14614.5	10455.4	12464.9	12635.2	14046.2	1.09136	-0.756267	0.847285	1.21578	0.673111	0.715961	-0.541341	-2.05736	-0.851427	-0.788908	-0.866795	1.2279	-1.03608	0.0577889	0.150461	0.918536
ANXA6	10404.1	-0.0871545	0.061436	-1.42149	0.155176	0.999738	11395	9892.19	8820.06	7700.53	11795.7	12170.3	13385.2	10348.3	10014	9771.68	9600.62	9084.64	12254.5	10703.3	9463.82	10065.4	0.673624	-0.347977	-1.0768	-1.83784	0.946034	1.20067	2.0265	-0.0378869	-0.265202	-0.429897	-0.54618	-0.896937	1.25793	0.203377	-0.639176	-0.230236
ANXA7	2444.97	0.059381	0.0577606	1.02829	0.303814	0.999738	2353.37	2292	2576.66	2837.22	2442.97	2232.66	2218.26	2345.12	2527.28	2497.83	2748.05	2531.29	2203.03	2499.53	2351.17	2463.13	-0.507368	-0.847289	0.729394	2.17257	-0.0110973	-1.17592	-1.25571	-0.553078	0.455886	0.292764	1.67865	0.478065	-1.34004	0.302156	-0.519549	0.100577
ANXA8	44.2305	0.0444001	0.115342	0.550375	0.582062	0.999738	1.19947	116.806	110.142	126.335	3.6764	6.74929	1.28149	0.668887	0.550127	2.13764	0	121.093	3.7135	1.2116	101.546	110.578	-0.762922	1.28674	1.16859	1.45568	-0.719008	-0.664527	-0.761468	-0.77233	-0.774435	-0.746289	-0.784189	1.36273	-0.71835	-0.762708	1.01617	1.17632
ANXA8L1	8.88195	0.0948313	0.0657574	1.81009	0.0702825	0.999738	0	23.3612	29.3713	27.1561	9.191	0	0	0	0	0	1.46173	33.1884	0	1.2116	3.34766	13.8223	-0.72114	1.1756	1.66356	1.48371	0.0250923	-0.72114	-0.72114	-0.72114	-0.72114	-0.72114	-0.60246	1.97348	-0.72114	-0.622769	-0.449339	0.401114
ANXA9	14.0361	-0.0543118	0.100466	-0.585767	0.558032	0.999738	8.39632	5.19139	16.0207	18.8912	9.191	4.04957	5.12596	14.0466	21.4549	33.6678	14.6173	11.6608	9.28375	13.3276	13.3906	26.2623	-0.705139	-1.10585	0.248131	0.607028	-0.605781	-1.24861	-1.11403	0.00131323	0.92757	2.45454	0.0726614	-0.296987	-0.594185	-0.0885883	-0.0807056	1.52864
AOC3	33.6475	-0.0763513	0.115383	-0.66596	0.505437	0.999738	27.5879	41.5311	26.0336	23.614	34.9258	31.0467	35.8817	26.0866	34.658	47.5624	34.3506	31.3944	51.0606	25.4435	31.2448	35.9379	-0.778051	1.01226	-0.977621	-1.2883	0.164139	-0.33394	0.286874	-0.970823	0.129747	1.78669	0.0902782	-0.289297	2.23585	-1.05339	-0.308508	0.294096
AOC4P	1.70137	-0.00652529	0.0574128	-0.274643	0.78359	0.999738	1.19947	0	0.667529	1.1807	1.8382	0	1.28149	1.33777	3.30076	4.80969	4.38518	0.896983	2.78512	2.4232	1.11589	0	-0.339872	-1.15212	-0.700091	-0.352586	0.0926556	-1.15212	-0.284334	-0.24622	1.08306	2.10486	1.8174	-0.544711	0.733886	0.488798	-0.396477	-1.15212
AOX1	362.677	-0.117912	0.113761	-1.08245	0.279054	0.999738	557.756	67.488	156.202	129.877	542.269	542.643	428.017	355.179	469.808	508.758	445.827	207.203	505.964	529.468	186.353	170.014	1.10037	-1.66505	-1.16465	-1.31314	1.01302	1.01512	0.368564	-0.0422926	0.60429	0.823992	0.46902	-0.87697	0.808233	0.940811	-0.994579	-1.08674
AP1AR	475.91	0.17084	0.0991484	1.72959	0.0837044	0.999738	434.21	703.433	556.719	593.892	433.815	359.062	620.241	472.903	353.181	392.791	364.701	577.657	418.697	347.729	457.513	528.011	-0.383155	2.09057	0.74251	1.08407	-0.386779	-1.07364	1.32617	-0.0276285	-1.12768	-0.763727	-1.02183	0.934894	-0.525693	-1.17778	-0.169037	0.478731
AP1B1	3975.6	-0.101203	0.0956244	-1.05984	0.289216	0.999738	4009.84	4831.88	3664.73	2693.18	3465.01	3863.29	4524.94	4532.38	3995.57	3858.97	3788.8	3526.94	4434.85	4037.04	4185.68	4196.45	0.0670045	1.67534	-0.608208	-2.50908	-0.998977	-0.219728	1.0748	1.08935	0.0390764	-0.22818	-0.365479	-0.877814	0.898531	0.120222	0.411042	0.432097
AP1B1P1	0.162231	0.000925895	0.0149914	0.121475	0.903315	0.999738	0	2.59569	0	0	0	0	0	0	0	0	0	0	0	0	0	0	-0.25	3.75	-0.25	-0.25	-0.25	-0.25	-0.25	-0.25	-0.25	-0.25	-0.25	-0.25	-0.25	-0.25	-0.25	-0.25
AP1G1	2757.87	-0.0681566	0.113204	-0.598593	0.549444	0.999738	3073.05	1757.28	3094	3072.18	3045.9	2887.34	1854.31	1755.83	2637.31	2898.64	2830.63	3344.85	2256.88	3116.23	3580.88	2920.65	0.563066	-1.78753	0.600481	0.561508	0.514554	0.231299	-1.61419	-1.79014	-0.215389	0.251474	0.129987	1.04862	-0.895017	0.640198	1.47028	0.290798
AP1G2	116.529	-0.171154	0.101475	-1.69004	0.0910195	0.999738	89.9606	131.083	132.171	82.649	84.5572	70.1926	79.4523	147.824	156.236	123.449	135.941	99.5651	81.697	168.412	136.138	145.134	-0.833778	0.456734	0.490886	-1.06323	-1.00335	-1.45415	-1.16355	0.982123	1.24611	0.217162	0.609194	-0.532364	-1.09311	1.62823	0.615387	0.897706
AP1M1	1928.96	-0.0782555	0.0880761	-0.892204	0.372283	0.999738	2622.05	1461.38	1731.57	1367.25	2200.33	2478.34	1809.46	1802.65	1864.93	1818.06	1848.35	1955.42	2519.61	1795.59	1870.22	1718.11	1.94879	-1.31471	-0.554999	-1.57937	0.763016	1.54471	-0.335987	-0.355144	-0.180031	-0.31181	-0.226636	0.0744125	1.66075	-0.375	-0.165145	-0.592845
AP1M2	0.753185	0.0208938	0.0323496	0.749888	0.453322	0.999738	0	2.59569	0	0	1.8382	0	2.56298	1.33777	0	1.60323	0.730863	0	0	0	0	1.38223	-0.768355	1.87962	-0.768355	-0.768355	1.10687	-0.768355	1.84624	0.596362	-0.768355	0.867164	-0.0227715	-0.768355	-0.768355	-0.768355	-0.768355	0.641713
AP1S1	1830.68	0.0484176	0.115393	0.395225	0.692677	0.999738	2097.88	1611.93	924.528	788.708	2163.56	2224.56	4437.8	2773.2	1724.65	1670.56	1522.39	847.649	2919.74	1753.18	849.189	981.382	0.277049	-0.22682	-0.939557	-1.08038	0.345152	0.408402	2.70322	0.977266	-0.109944	-0.16602	-0.319658	-1.01927	1.1292	-0.0803569	-1.01767	-0.880607
AP1S2	339.84	-0.00791354	0.113162	-0.080375	0.935939	0.999738	548.16	150.55	273.019	340.042	499.991	518.345	328.061	216.05	320.724	337.747	287.229	309.459	463.259	327.131	263.349	254.33	1.85446	-1.68506	-0.594841	0.00179107	1.42566	1.58905	-0.104858	-1.10198	-0.170176	-0.0186371	-0.468344	-0.270455	1.09867	-0.113136	-0.680928	-0.761213
AP1S3	231.124	0.115856	0.112841	1.0278	0.304042	0.999738	152.333	424.396	259.001	303.44	150.732	124.187	211.446	279.595	191.444	214.833	251.417	290.622	212.598	185.374	225.409	221.157	-1.0887	2.67057	0.385199	0.999237	-1.11082	-1.47762	-0.271908	0.66975	-0.548284	-0.225108	0.280402	0.822129	-0.255989	-0.632152	-0.0789708	-0.137726
AP2A1	7135.79	-0.033046	0.108376	-0.304905	0.760438	0.999738	6557.53	10076.5	7207.98	4638.97	5200.27	6374.03	7500.56	9300.87	7595.05	7125.28	6777.3	6541.7	7167.05	7086.63	7373.77	7649.25	-0.444517	2.26052	0.0554889	-1.91932	-1.48785	-0.585576	0.280394	1.6643	0.35303	-0.00808048	-0.275579	-0.456687	0.0240281	-0.0377895	0.182932	0.394699
AP2A2	2200.7	-0.0846084	0.0831288	-1.01921	0.308102	0.999738	2154.26	2442.55	2072.01	1693.12	1919.08	2046.38	2484.81	2487.59	2310.53	2142.45	2166.28	2082.79	2465.76	2115.45	2343.36	2284.82	-0.209614	1.09144	-0.580788	-2.2907	-1.27095	-0.696442	1.28216	1.29471	0.495654	-0.262904	-0.155354	-0.532121	1.19621	-0.384748	0.643803	0.379637
AP2B1	5799.19	-0.0858154	0.100777	-0.857045	0.39142	0.999738	6902.98	3709.25	5298.85	5157.3	6553.19	6565.71	4933.73	4592.58	6155.92	6531.02	6638.43	5720.06	5694.65	6881.87	6179.77	5271.82	1.20485	-2.28131	-0.546161	-0.70067	0.823029	0.836695	-0.944705	-1.3171	0.389384	0.798832	0.916081	-0.0863805	-0.114117	1.18181	0.415424	-0.575662
AP2M1	12103.8	-0.0261385	0.0718842	-0.360804	0.718246	0.999738	12021.1	14149.1	13301.9	10943.9	11003.5	11216	10658.1	10639.3	11596.7	12215.5	11239.9	14267.4	9811.99	12552.2	13771.1	14272.9	-0.0567331	1.40386	0.822316	-0.796109	-0.755228	-0.609379	-0.992249	-1.00518	-0.348075	0.0766975	-0.592916	1.48505	-1.57303	0.307742	1.14442	1.48881
AP2S1	3378.77	0.0340355	0.114506	0.299623	0.764465	0.999738	2721.61	5823.44	3421.75	2762.84	2376.79	2810.4	4346.81	4472.18	2970.13	3094.77	2902.99	3121.5	3565.89	3021.72	3003.96	3643.55	-0.761799	2.83391	0.0498268	-0.714003	-1.16151	-0.658866	1.12217	1.2675	-0.473702	-0.329225	-0.551537	-0.298234	0.216909	-0.413897	-0.434487	0.306943
AP3B1	1767.01	-0.0635998	0.108263	-0.585996	0.557878	0.999738	1859.19	1117.45	1806.33	2185.48	1970.55	1807.46	1351.97	1303.66	1731.8	1823.94	1930.21	1924.93	1568.02	2035.48	2000.78	1854.95	0.317121	-2.23483	0.135285	1.43972	0.700275	0.139156	-1.42795	-1.59416	-0.121154	0.195858	0.561482	0.543298	-0.684615	0.923675	0.804282	0.302552
AP3B2	11.194	-0.177982	0.0980411	-1.88447	0.0595015	0.999738	21.5905	1.29785	0.667529	1.1807	23.8966	20.2479	35.8817	8.69553	3.85089	5.3441	3.65432	0.896983	37.135	7.26959	3.34766	4.14669	0.834762	-0.79458	-0.845189	-0.803986	1.01992	0.726955	1.98223	-0.200605	-0.589591	-0.469698	-0.605374	-0.826766	2.08286	-0.315097	-0.629997	-0.565841
AP3D1	7310.18	-0.113528	0.0811522	-1.40006	0.161496	0.999738	8002.89	8020.69	6744.05	5249.39	7273.76	7772.48	8879.44	7385.85	6882.08	6624.54	6390.67	6749.8	8940.25	7043.02	7841.32	7162.71	0.741793	0.760854	-0.606251	-2.20681	-0.0390032	0.495051	1.68045	0.0810229	-0.458434	-0.734225	-0.984667	-0.600095	1.74556	-0.286097	0.568775	-0.157924
AP3M1	780.596	-0.00587072	0.11516	-0.0500924	0.960049	0.999738	892.409	375.078	827.736	929.211	884.175	846.36	452.366	452.836	864.249	947.508	939.89	926.583	635.008	891.736	884.897	739.492	0.579137	-2.10039	0.244163	0.769753	0.536487	0.340628	-1.70007	-1.69763	0.433281	0.864524	0.825067	0.756143	-0.754073	0.57565	0.540228	-0.212896
AP3M2	394.456	-0.111876	0.0992921	-1.12603	0.260152	0.999738	428.212	271.25	405.19	451.027	439.33	390.109	354.973	280.263	407.644	380.5	372.01	419.788	393.631	415.578	460.861	440.931	0.617701	-2.25452	0.196422	1.03519	0.82114	-0.0795497	-0.7225	-2.08958	0.24132	-0.255385	-0.410743	0.463544	-0.0150991	0.386507	1.21512	0.850435
AP3S1	709.496	0.0479777	0.114889	0.42455	0.671165	0.999738	740.076	377.673	863.115	1381.42	704.031	749.171	381.884	446.816	714.064	717.178	706.745	826.121	618.298	684.553	727.557	713.23	0.133503	-1.44863	0.670653	2.9334	-0.0238571	0.173209	-1.43025	-1.14677	0.019945	0.033537	-0.0120085	0.50915	-0.398142	-0.108893	0.0788503	0.016303
AP3S2	665.241	-0.134949	0.087208	-1.54752	0.121738	0.999738	543.362	493.182	688.222	586.808	584.548	645.232	511.314	665.542	802.084	736.416	809.797	690.677	566.309	917.179	757.686	645.501	-1.03185	-1.45668	0.194563	-0.664028	-0.683162	-0.169403	-1.30317	0.00254767	1.15854	0.60258	1.22383	0.215342	-0.837579	2.13295	0.782651	-0.167125
AP4B1	426.429	0.00225063	0.0968264	0.0285092	0.977256	0.999738	473.792	349.121	491.301	466.377	511.02	410.357	337.032	339.125	396.091	370.346	389.55	536.396	410.342	336.824	461.976	543.216	0.65782	-1.07372	0.900999	0.554822	1.17486	-0.223228	-1.24162	-1.21254	-0.421359	-0.77893	-0.512204	1.52731	-0.223436	-1.24451	0.49371	1.62203
AP4B1-AS1	13.3442	0.000638341	0.100819	-0.00793357	0.99367	0.999738	20.3911	1.29785	10.0129	12.9877	14.7056	16.1983	12.8149	27.4243	12.6529	11.757	10.2321	11.6608	19.4959	19.3856	5.57943	6.91114	1.10862	-1.89515	-0.524081	-0.0560876	0.214176	0.449006	-0.083274	2.21511	-0.108757	-0.249701	-0.489604	-0.264841	0.967786	0.950432	-1.22157	-1.01206
AP4E1	629.653	-0.066685	0.111484	-0.59909	0.549113	0.999738	730.48	349.121	616.129	775.72	744.471	758.62	621.522	375.245	568.831	621.518	560.572	705.925	638.722	637.3	663.952	706.319	0.82045	-2.28275	-0.110045	1.18858	0.934301	1.04943	-0.0661615	-2.07017	-0.494923	-0.0661938	-0.562124	0.620645	0.0737942	0.0622279	0.279095	0.623846
AP4M1	665.095	0.0589992	0.115176	0.512685	0.608172	0.999738	524.17	1116.15	566.732	425.052	531.24	541.293	1099.52	936.441	642.548	613.502	608.809	558.82	660.074	617.915	523.35	675.91	-0.689675	2.20742	-0.481381	-1.17475	-0.655076	-0.605879	2.12603	1.32795	-0.110345	-0.252492	-0.275459	-0.520101	-0.0245715	-0.230897	-0.693689	0.0529259
AP4S1	208.149	0.027575	0.113218	0.245887	0.80577	0.999738	183.52	288.122	151.529	157.033	253.672	230.826	296.024	252.17	163.938	184.906	173.946	183.881	280.369	140.545	196.396	193.512	-0.480207	1.55924	-1.10393	-0.996617	0.887557	0.442123	1.7133	0.858282	-0.861997	-0.453182	-0.666874	-0.473151	1.40808	-1.31808	-0.229159	-0.285384
AP5B1	1526.25	-0.00855947	0.114901	-0.0750427	0.940181	0.999738	1488.55	2407.51	1377.11	976.439	1382.33	1438.95	2395.1	1822.05	1376.42	1253.72	1154.76	1211.82	1758.34	1386.07	1426.1	1564.68	-0.0944071	2.20687	-0.373466	-1.37684	-0.360407	-0.218617	2.17581	0.740749	-0.375209	-0.682456	-0.930275	-0.787385	0.581216	-0.35104	-0.250788	0.0962517
AP5M1	440.208	0.048708	0.103662	0.47547	0.634452	0.999738	448.603	347.823	491.969	611.603	424.624	453.552	430.58	318.39	442.852	445.698	447.288	444.007	316.576	454.349	495.453	469.958	0.118309	-1.30186	0.729403	2.41525	-0.219597	0.188043	-0.135667	-1.71662	0.0372593	0.0773603	0.0997785	0.0535304	-1.74219	0.199275	0.778499	0.419228
AP5S1	730.116	-0.0236465	0.112123	-0.212316	0.831861	0.999738	622.527	999.342	718.261	517.147	503.667	646.582	912.42	997.979	744.871	730.538	678.241	648.519	854.105	667.59	678.458	761.608	-0.730576	1.82817	-0.0804984	-1.44616	-1.53769	-0.567236	1.23793	1.81891	0.100196	0.00286501	-0.352253	-0.554083	0.84194	-0.424578	-0.35078	0.213845
AP5Z1	1262.92	-0.0376311	0.114671	-0.33089	0.740728	0.999738	1134.7	1763.77	1128.79	770.997	1077.19	1163.58	1863.29	1733.75	1292.25	1076.84	1001.28	1017.18	1444.55	1170.4	1274.34	1293.77	-0.425693	1.66293	-0.445319	-1.63326	-0.61666	-0.329826	1.99333	1.56326	0.0973813	-0.617824	-0.86867	-0.815894	0.603056	-0.307162	0.0379286	0.102424
APAF1	1099.97	0.0784202	0.0927735	0.838935	0.401506	0.999738	1253.45	1207	754.308	806.418	1264.68	1372.8	1387.85	1327.74	1028.74	1151.12	1137.22	862.897	1393.49	1114.67	775.54	761.608	0.645357	0.450028	-1.45346	-1.23434	0.692583	1.14722	1.21049	0.957729	-0.299529	0.215065	0.15664	-0.996855	1.2342	0.0618055	-1.36418	-1.42276
APBA2	336.31	0.0188015	0.0852793	0.240943	0.809599	0.999738	239.895	609.988	556.052	426.233	220.584	203.828	244.764	203.342	196.945	188.112	203.18	565.099	224.667	167.2	594.767	536.305	-0.552442	1.56813	1.25908	0.515241	-0.66309	-0.759097	-0.524541	-0.761887	-0.798536	-0.849148	-0.762812	1.31092	-0.639697	-0.968969	1.48091	1.14593
APBA3	580.915	-0.0142007	0.115387	-0.121792	0.903064	0.999738	474.992	934.45	613.459	315.247	397.051	502.147	729.167	832.095	628.244	564.336	450.212	481.68	570.95	530.68	603.694	666.234	-0.671897	2.24256	0.206437	-1.6852	-1.16629	-0.499646	0.940403	1.5933	0.300223	-0.105161	-0.829083	-0.629474	-0.0632076	-0.318655	0.144492	0.541202
APBB1	1496.33	-0.0310735	0.0956322	-0.323468	0.746341	0.999738	1369.8	2003.88	1552.67	1246.82	1360.27	1347.16	1767.17	1665.53	1449.03	1372.9	1300.21	1340.99	1464.05	1461.19	1518.72	1720.87	-0.624849	2.50648	0.278253	-1.23218	-0.671918	-0.736666	1.33755	0.835577	-0.233561	-0.609548	-0.968532	-0.767127	-0.159418	-0.173543	0.110578	1.1089
APBB1IP	43.5865	-0.0972912	0.11347	-0.928325	0.353239	0.999738	43.1811	1.29785	0.667529	2.3614	23.8966	28.347	33.3187	67.5575	107.825	118.105	102.321	0.896983	38.0634	128.429	1.11589	0	-0.00870722	-0.90831	-0.921848	-0.885466	-0.422915	-0.327326	-0.220539	0.514871	1.37976	1.60056	1.26155	-0.91692	-0.11863	1.82233	-0.912218	-0.936186
APBB2	2939.26	0.044225	0.104339	0.469312	0.638846	0.999738	1543.72	3916.9	5457.05	4825.52	1683.79	1433.55	1171.28	1383.93	1905.64	1846.92	2239.37	5851.02	1122.4	1697.45	5977.8	4971.88	-0.752236	0.526975	1.35716	1.01675	-0.676736	-0.811624	-0.952994	-0.838372	-0.557154	-0.588805	-0.377265	1.56952	-0.97934	-0.669374	1.63786	1.09564
APBB3	245.269	0.0343127	0.105179	0.329453	0.741814	0.999738	179.921	345.227	306.396	221.972	180.144	155.234	235.794	323.741	295.418	221.78	240.454	241.288	201.457	230.204	257.769	287.504	-1.20208	1.83875	1.12444	-0.428557	-1.19799	-1.65621	-0.174292	1.44351	0.922499	-0.432082	-0.0885694	-0.0732222	-0.805921	-0.277129	0.229949	0.776912
APC	1350.87	-0.0038791	0.115337	-0.0309601	0.975301	0.999738	1637.28	791.687	1286.33	1872.59	1746.29	1529.39	832.968	834.102	1244.39	1382.52	1399.6	1584.07	1192.03	1297.62	1696.15	1286.85	0.87287	-1.70414	-0.196684	1.58998	1.20508	0.544055	-1.57833	-1.57487	-0.324506	0.0964573	0.148528	0.710706	-0.484056	-0.16227	1.05226	-0.19508
APC2	239.947	-0.0411652	0.113469	-0.363385	0.716317	0.999738	245.892	185.592	98.1268	115.709	336.391	252.423	383.165	457.518	237.655	215.367	207.565	95.9772	585.804	222.934	121.631	77.4048	0.0421392	-0.385278	-1.00525	-0.880624	0.683608	0.0884322	1.01515	1.54218	-0.0162504	-0.174229	-0.229529	-1.02048	2.45149	-0.120593	-0.838642	-1.15213
APCDD1	22.8069	-0.02555	0.0928407	-0.303279	0.761677	0.999738	77.9658	0	0	0	36.764	79.6416	70.4819	2.00666	3.30076	4.27528	2.92345	0	86.3388	1.2116	0	0	1.59604	-0.659921	-0.659921	-0.659921	0.403853	1.64452	1.37949	-0.601858	-0.564413	-0.536215	-0.57533	-0.659921	1.83831	-0.624863	-0.659921	-0.659921
APCDD1L	12046.3	-0.0112311	0.114186	-0.0367682	0.97067	0.999738	3097.04	30722.6	22254.1	13971.2	2308.78	3081.72	4721.01	10821.2	8416.94	7199.03	7687.22	19399.9	3245.6	7142.37	23539.6	25133.1	-0.968129	2.02039	1.10427	0.208232	-1.0534	-0.969786	-0.79245	-0.13253	-0.392627	-0.524379	-0.471567	0.795508	-0.952059	-0.530509	1.24333	1.41571
APCDD1L-AS1	225.752	0.0477434	0.0986871	0.51042	0.609757	0.999738	85.1627	436.077	353.79	423.871	66.1752	59.3937	103.801	201.335	172.19	165.133	157.136	356.999	66.843	157.508	361.547	445.078	-0.972966	1.45557	0.886102	1.3711	-1.10437	-1.1513	-0.84398	-0.168984	-0.370687	-0.419526	-0.474869	0.908308	-1.09975	-0.472295	0.93978	1.51787
APEH	3868.09	-0.0263687	0.0963136	-0.274333	0.783829	0.999738	3444.89	4929.22	3566.61	3130.04	3610.23	3594.67	4833.78	4618.66	3816.23	3661.77	3547.61	3462.35	3931.67	4161.84	3817.44	3762.43	-0.820083	2.05628	-0.584217	-1.43021	-0.499692	-0.529838	1.87133	1.45447	-0.100499	-0.399802	-0.621029	-0.786243	0.123201	0.569231	-0.0981444	-0.204756
APEX1	2755.78	-0.0113831	0.0600382	-0.191018	0.848511	0.999738	2956.7	2327.04	2762.9	2392.1	3027.52	3103.32	2919.23	2664.84	2725.88	2977.73	2625.99	2678.39	2734.99	2945.39	2492.89	2757.55	0.889941	-1.89898	0.0315519	-1.61082	1.20358	1.53934	0.723968	-0.402772	-0.132444	0.983066	-0.574853	-0.34277	-0.0920728	0.839842	-1.1644	0.00782576
APEX2	552.483	-0.0283075	0.0676573	-0.417975	0.675966	0.999738	572.149	576.244	572.74	465.196	496.314	584.488	598.455	527.751	557.828	516.774	523.298	589.318	571.879	512.506	567.985	606.798	0.486003	0.58719	0.500599	-2.15706	-1.38805	0.790923	1.13609	-0.611166	0.132098	-0.882443	-0.721216	0.910272	0.479317	-0.987921	0.383105	1.34226
APH1A	2532.03	-0.0111731	0.0713264	-0.156969	0.875269	0.999738	2866.74	2820.22	2560.64	2040.25	2408.04	2794.2	2967.93	2440.1	2420.56	2310.25	2351.92	2377.9	2887.25	2276.59	2443.79	2546.07	1.27268	1.09579	0.108796	-1.86988	-0.471425	0.996866	1.65741	-0.349543	-0.423845	-0.843252	-0.684826	-0.586032	1.35063	-0.971239	-0.335512	0.0533725
APH1B	288.827	-0.0774422	0.0980303	-0.79012	0.429457	0.999738	253.089	224.527	303.726	295.175	209.555	288.869	194.786	279.595	318.523	362.864	379.318	294.21	245.091	371.96	341.461	258.477	-0.631867	-1.13686	0.263426	0.112243	-1.40158	0.000755291	-1.6627	-0.163231	0.525057	1.30904	1.59996	0.0951871	-0.773282	1.46987	0.93061	-0.53661
API5	1777.55	-0.00287262	0.114998	-0.0284653	0.977291	0.999738	2213.03	918.876	1828.36	2076.85	2439.29	2058.53	1216.13	1151.82	1787.91	1974.64	1759.92	1968.88	1749.99	1908.27	1782.07	1606.15	1.09655	-2.16212	0.127957	0.753651	1.66628	0.707524	-1.41363	-1.57557	0.0261017	0.496292	-0.0443819	0.481773	-0.0693932	0.329155	0.0113896	-0.431573
APIP	254.541	0.0853999	0.111249	0.762842	0.445557	0.999738	343.05	147.955	232.3	317.608	457.712	356.362	280.646	164.546	173.84	237.812	220.721	224.246	300.793	205.972	208.671	200.423	1.07082	-1.28953	-0.26908	0.763016	2.45805	1.23188	0.315831	-1.0888	-0.976357	-0.202392	-0.409172	-0.366526	0.559581	-0.587614	-0.554962	-0.654742
APITD1	269.545	-0.0326708	0.0724321	-0.449887	0.652792	0.999738	298.669	301.1	268.347	288.091	261.025	245.674	281.928	236.117	250.308	251.707	267.496	256.537	297.08	248.378	264.465	295.797	1.35937	1.47285	-0.0559213	0.865627	-0.39768	-1.11416	0.577963	-1.56023	-0.89789	-0.832577	-0.0956258	-0.60713	1.28519	-0.987975	-0.237109	1.22531
APITD1-CORT	39.8813	0.181322	0.114589	1.5819	0.113673	0.999738	56.3753	32.4462	36.0466	46.0473	51.4696	45.8951	49.9781	53.5109	21.4549	34.7366	27.7728	57.4069	38.9917	38.7711	22.3177	24.8801	1.36395	-0.614842	-0.317111	0.50989	0.958284	0.497308	0.834942	1.12709	-1.52375	-0.425436	-1.0013	1.44926	-0.0735631	-0.0918064	-1.45241	-1.24051
APLF	80.6508	0.109395	0.115179	0.983675	0.325275	0.999738	86.3622	49.3182	101.464	140.503	91.91	80.9914	66.6374	56.8554	63.2645	74.2829	67.2394	101.359	46.4187	56.9451	100.43	106.432	0.225051	-1.23465	0.820147	2.35845	0.443663	0.0134208	-0.55219	-0.937647	-0.685096	-0.250924	-0.528468	0.815995	-1.3489	-0.934111	0.779373	1.01588
APLN	22.8481	0.205853	0.111872	1.91811	0.0550973	0.999738	10.7953	62.2966	38.0492	35.421	3.6764	13.4986	16.6594	23.411	15.4035	12.8258	17.5407	33.1884	4.64187	8.48118	32.3607	37.3202	-0.766082	2.50736	0.966183	0.799136	-1.21856	-0.594259	-0.393359	0.0357792	-0.473179	-0.637019	-0.337339	0.657229	-1.15719	-0.913166	0.604621	0.919848
APLNR	1.91874	-0.0390693	0.0464209	-0.272288	0.785401	0.999738	0	6.48923	0.667529	3.5421	0	0	0	0.668887	0	2.13764	0	3.58793	0	0	6.69531	6.91114	-0.719485	1.71384	-0.469176	0.608727	-0.719485	-0.719485	-0.719485	-0.468667	-0.719485	0.0820838	-0.719485	0.625913	-0.719485	-0.719485	1.79111	1.87205
APLP1	459.672	0.0341473	0.115002	0.293635	0.769037	0.999738	232.698	665.795	418.541	330.596	205.879	282.12	433.143	890.957	670.604	589.988	513.797	367.763	298.008	644.57	369.358	440.931	-1.19995	1.08972	-0.217448	-0.682387	-1.34173	-0.938665	-0.140248	2.28008	1.11514	0.688946	0.286145	-0.485896	-0.854669	0.977504	-0.477464	-0.0990775
APLP2	15463.7	0.00906316	0.0514468	0.175845	0.860416	0.999738	12835.6	13502.8	14189	14774.1	12959.3	12888.4	13096.8	17740.2	19597.7	20328.9	20329.7	14122.1	11359.6	20782.5	14363.7	14548	-0.831176	-0.620156	-0.403132	-0.218084	-0.792041	-0.814459	-0.748554	0.720002	1.30747	1.53873	1.53897	-0.424291	-1.29798	1.68219	-0.347889	-0.289606
APMAP	3668.89	-0.0177531	0.0496958	-0.357197	0.720944	0.999738	3512.06	3583.35	3828.95	3395.69	3654.34	3643.26	3894.45	3539.75	3651.19	3827.44	3551.27	3781.68	3403.42	3917.1	3675.73	3842.6	-0.942989	-0.514316	0.962377	-1.64269	-0.0874772	-0.154093	1.35621	-0.776518	-0.10644	0.953323	-0.707263	0.678169	-1.59622	1.49239	0.0410875	1.04444
APOA1	74.6227	0.0502882	0.103286	0.36649	0.714	0.999738	67.1706	42.8289	11.348	14.1684	119.483	99.8894	252.453	137.791	77.0177	68.4044	70.1629	17.0427	93.7658	73.9075	16.7383	31.7913	-0.122049	-0.520713	-1.0363	-0.99011	0.734716	0.413815	2.91248	1.03455	0.0392254	-0.101842	-0.0730417	-0.943036	0.313523	-0.0117139	-0.948021	-0.701486
APOA1-AS	2.87513	0.0196697	0.0693165	0.3347	0.737851	0.999738	2.39895	0	5.34023	8.2649	3.6764	2.69971	1.28149	2.00666	2.75063	2.13764	1.46173	3.58793	5.57025	1.2116	2.23177	1.38223	-0.231757	-1.39932	1.19975	2.62318	0.389975	-0.0853753	-0.77562	-0.422682	-0.0605936	-0.358936	-0.687899	0.346916	1.3117	-0.809636	-0.313122	-0.72659
APOA1BP	900.987	0.0199559	0.0813141	0.244146	0.807118	0.999738	959.58	946.13	928.533	663.553	781.235	923.302	985.465	1018.05	929.714	953.387	904.078	893.395	916.306	892.947	802.321	917.8	0.677361	0.52188	0.318445	-2.74486	-1.38439	0.257976	0.976612	1.35325	0.332097	0.605767	0.0357345	-0.0877688	0.177093	-0.0929418	-1.14063	0.194365
APOA2	0.193255	-0.00633366	0.0149922	-0.378363	0.705161	0.999738	0	0	0	0	0	0	0	0.668887	0	0	0	0	0	2.4232	0	0	-0.312905	-0.312905	-0.312905	-0.312905	-0.312905	-0.312905	-0.312905	0.77011	-0.312905	-0.312905	-0.312905	-0.312905	-0.312905	3.61057	-0.312905	-0.312905
APOA4	0.86047	0.0155779	0.0377284	0.440497	0.659577	0.999738	0	2.59569	3.33765	3.5421	0	0	0	0	0	0	0	1.79397	0	0	1.11589	1.38223	-0.667164	1.3454	1.92068	2.0792	-0.667164	-0.667164	-0.667164	-0.667164	-0.667164	-0.667164	-0.667164	0.723785	-0.667164	-0.667164	0.198036	0.404545
APOA5	1.04402	0.023338	0.039395	0.611904	0.540601	0.999738	0	1.29785	2.67012	0	0	1.34986	0	0.668887	2.75063	3.74087	1.46173	0	0	0	0	2.76446	-0.808979	0.196678	1.26	-0.808979	-0.808979	0.23698	-0.808979	-0.290682	1.32239	2.08969	0.323664	-0.808979	-0.808979	-0.808979	-0.808979	1.33311
APOBEC2	2.05933	-0.000707592	0.0445005	-0.0785671	0.937377	0.999738	0	1.29785	2.00259	0	1.8382	2.69971	0	4.68221	0	2.67205	4.38518	5.3819	4.64187	0	3.34766	0	-1.0426	-0.385523	-0.0287255	-1.0426	-0.111951	0.324217	-1.0426	1.32792	-1.0426	0.31021	1.17754	1.68216	1.3075	-1.0426	0.652258	-1.0426
APOBEC3A	0.162231	0.000925895	0.0149914	0.121475	0.903315	0.999738	0	2.59569	0	0	0	0	0	0	0	0	0	0	0	0	0	0	-0.25	3.75	-0.25	-0.25	-0.25	-0.25	-0.25	-0.25	-0.25	-0.25	-0.25	-0.25	-0.25	-0.25	-0.25	-0.25
APOBEC3B	550.649	-0.0448395	0.0863413	-0.531742	0.594905	0.999738	597.338	284.228	415.203	316.428	549.622	515.645	424.173	827.413	791.632	806.424	825.876	367.763	557.025	789.962	390.56	351.086	0.234301	-1.33697	-0.679701	-1.17538	-0.00515136	-0.175655	-0.634688	1.38887	1.20932	1.28355	1.38116	-0.917768	0.0319973	1.20094	-0.803367	-1.00146
APOBEC3B-AS1	0.133229	-0.00226857	0.0149914	-0.177247	0.859315	0.999738	0	0	0	0	0	0	0	0.668887	0	0.53441	0	0	0.928375	0	0	0	-0.450676	-0.450676	-0.450676	-0.450676	-0.450676	-0.450676	-0.450676	1.81197	-0.450676	1.35707	-0.450676	-0.450676	2.68974	-0.450676	-0.450676	-0.450676
APOBEC3C	681.164	0.0162692	0.0999215	0.162022	0.871288	0.999738	648.916	477.608	768.326	711.962	637.856	714.074	586.922	561.196	875.251	780.772	782.024	670.046	583.019	779.057	723.094	598.505	-0.309408	-1.95302	0.836272	0.29549	-0.415523	0.315756	-0.904205	-1.15104	1.86216	0.955688	0.967696	-0.106672	-0.941651	0.939233	0.402289	-0.793073
APOBEC3D	45.1585	-0.00963151	0.112105	-0.10709	0.914717	0.999738	39.5827	32.4462	28.7038	17.7105	40.4404	45.8951	57.667	66.2198	73.1668	65.7324	55.5456	31.3944	51.0606	60.5799	30.1289	26.2623	-0.333206	-0.759673	-0.983315	-1.64026	-0.281948	0.0440194	0.747491	1.25859	1.67374	1.22947	0.620719	-0.822526	0.352701	0.92156	-0.89815	-1.12921
APOBEC3F	157.746	0.148684	0.105571	1.40454	0.160159	0.999738	113.95	210.251	186.241	142.865	108.454	167.382	176.846	167.891	161.737	177.958	199.526	145.311	130.901	170.835	128.327	135.458	-1.47204	1.76479	0.957756	-0.500177	-1.65678	0.323898	0.641972	0.340981	0.134158	0.679377	1.40429	-0.417945	-0.902302	0.439958	-0.988819	-0.749114
APOBEC3G	65.0053	0.0586761	0.111946	0.518511	0.604102	0.999738	104.354	60.9988	57.4075	50.7701	68.0134	91.7903	57.667	70.902	67.6656	58.2506	72.3555	42.1582	81.697	52.0987	62.4896	41.4669	2.33106	-0.23735	-0.450101	-0.843305	0.178202	1.58676	-0.434727	0.349321	0.157594	-0.400153	0.435428	-1.35348	0.988824	-0.764598	-0.149036	-1.39444
APOBEC3H	0.310954	0.00864026	0.0195534	0.431599	0.666033	0.999738	0	0	1.33506	0	0	0	1.28149	0	0	0	1.46173	0.896983	0	0	0	0	-0.548623	-0.548623	1.80685	-0.548623	-0.548623	-0.548623	1.71234	-0.548623	-0.548623	-0.548623	2.03034	1.03395	-0.548623	-0.548623	-0.548623	-0.548623
APOBEC4	9.8939	0.105615	0.0811449	1.48701	0.137013	0.999738	4.7979	6.48923	10.6805	33.0596	25.7348	2.69971	6.40745	4.01332	2.75063	6.94732	8.77036	17.9397	6.49862	1.2116	13.3906	6.91114	-0.579992	-0.387496	0.0895211	2.63656	1.8029	-0.818793	-0.396804	-0.669287	-0.812997	-0.335359	-0.127874	0.915712	-0.386427	-0.98816	0.397972	-0.339477
APOBR	0.511264	0.029376	0.0292936	0.991687	0.32135	0.999738	0	2.59569	0	1.1807	0	0	0	1.33777	1.10025	1.06882	0	0.896983	0	0	0	0	-0.663864	2.70658	-0.663864	0.869248	-0.663864	-0.663864	-0.663864	1.0732	0.764789	0.723973	-0.663864	0.500847	-0.663864	-0.663864	-0.663864	-0.663864
APOC1	10.2872	0.0945585	0.103271	0.954569	0.339796	0.999738	1.19947	16.872	16.6882	16.5298	3.6764	6.74929	12.8149	10.7022	11.5527	8.01614	7.30863	14.3517	4.64187	4.84639	18.97	9.6756	-1.68165	1.21849	1.18448	1.15516	-1.2233	-0.654677	0.467737	0.0767894	0.234166	-0.420251	-0.551172	0.752121	-1.04464	-1.0068	1.60672	-0.113175
APOC3	0.419219	0.0126419	0.0319885	0.348872	0.727186	0.999738	0	0	0.667529	0	0	0	0	0.668887	1.10025	0.53441	0.730863	1.79397	0	1.2116	0	0	-0.74126	-0.74126	0.43906	-0.74126	-0.74126	-0.74126	-0.74126	0.44146	1.2042	0.203679	0.551048	2.43082	-0.74126	1.40108	-0.74126	-0.74126
APOD	1.86591	0.00838512	0.0568594	0.136601	0.891346	0.999738	2.39895	5.19139	0.667529	1.1807	0	2.69971	2.56298	3.34443	0	2.67205	1.46173	0.896983	1.85675	2.4232	1.11589	1.38223	0.401506	2.50487	-0.902659	-0.516121	-1.40547	0.628053	0.525058	1.11368	-1.40547	0.607213	-0.304442	-0.729827	-0.00689766	0.419769	-0.564942	-0.364323
APOE	76.7027	0.0509869	0.109557	0.4928	0.622154	0.999738	20.3911	241.399	107.472	88.5525	31.2494	25.6473	60.23	83.6108	50.6116	56.6474	62.1234	95.0802	52.9174	33.9247	102.661	114.725	-1.05762	3.09326	0.577898	0.222557	-0.853684	-0.958901	-0.309384	0.129744	-0.490031	-0.37667	-0.273823	0.345157	-0.446726	-0.803437	0.487544	0.714117
APOF	0.206312	-0.00226776	0.0149914	-0.157244	0.875053	0.999738	0	0	0	0	1.8382	0	0	0	0	0.53441	0	0	0.928375	0	0	0	-0.407471	-0.407471	-0.407471	-0.407471	3.22303	-0.407471	-0.407471	-0.407471	-0.407471	0.648003	-0.407471	-0.407471	1.4261	-0.407471	-0.407471	-0.407471
APOH	0.160186	0.00081879	0.0149914	0.0284465	0.977306	0.999738	0	0	0	0	0	0	2.56298	0	0	0	0	0	0	0	0	0	-0.25	-0.25	-0.25	-0.25	-0.25	-0.25	3.75	-0.25	-0.25	-0.25	-0.25	-0.25	-0.25	-0.25	-0.25	-0.25
APOL1	350.007	0.151456	0.104378	1.44297	0.149028	0.999738	244.693	436.077	267.012	239.682	248.157	238.925	346.002	557.851	525.371	488.45	499.911	301.386	265.515	450.714	238.799	251.566	-0.874426	0.714638	-0.689112	-0.91603	-0.845662	-0.922319	-0.0332523	1.72574	1.45605	1.1495	1.24465	-0.403699	-0.701538	0.836176	-0.923359	-0.817361
APOL2	642.474	0.0414226	0.0572376	0.724101	0.469003	0.999738	612.931	700.837	651.508	651.746	650.723	638.482	645.871	577.249	690.959	630.069	630.735	669.149	597.873	627.608	623.78	680.056	-0.901093	1.7802	0.275578	0.282839	0.251626	-0.121739	0.103613	-1.98948	1.4789	-0.37837	-0.358046	0.813657	-1.3604	-0.453444	-0.5702	1.14635
APOL3	160.253	0.0199382	0.105617	0.181878	0.855679	0.999738	105.554	170.018	123.493	146.407	101.101	107.989	158.905	246.15	223.351	233.537	219.99	109.432	125.331	264.128	95.9661	132.694	-0.941352	0.168054	-0.632625	-0.238285	-1.01798	-0.899449	-0.0232012	1.47826	1.0859	1.26119	1.02805	-0.87461	-0.600999	1.78766	-1.10635	-0.474278
APOL4	8.41314	-0.0698527	0.0834985	-0.85731	0.391274	0.999738	8.39632	5.19139	1.33506	1.1807	0	8.09914	0	10.7022	21.4549	21.3764	14.6173	2.69095	4.64187	29.0783	4.46354	1.38223	-0.00190048	-0.363959	-0.799605	-0.817043	-0.950426	-0.0354725	-0.950426	0.258591	1.47332	1.46445	0.700874	-0.646431	-0.426037	2.33453	-0.446183	-0.794276
APOL5	0.911125	0.041474	0.0393777	1.15438	0.248346	0.999738	0	0	0.667529	2.3614	0	1.34986	1.28149	2.00666	0	0.53441	3.65432	1.79397	0.928375	0	0	0	-0.832891	-0.832891	-0.22268	1.32575	-0.832891	0.40106	0.338563	1.00147	-0.832891	-0.344369	2.50765	0.807035	0.0157684	-0.832891	-0.832891	-0.832891
APOL6	656.006	0.0873164	0.0809856	1.07779	0.281128	0.999738	622.527	665.795	634.82	846.562	656.238	688.427	699.693	566.547	625.494	679.769	663.624	650.313	583.019	689.399	646.097	577.772	-0.515824	0.15083	-0.326421	2.93599	0.00357	0.499529	0.673109	-1.37834	-0.470116	0.366127	0.117374	-0.0877221	-1.12454	0.514503	-0.152667	-1.2054
APOLD1	775.294	0.0712694	0.0967376	0.755786	0.449778	0.999738	347.848	1631.39	1308.36	1206.68	363.964	355.012	520.285	649.489	545.175	523.187	541.57	1098.8	405.7	501.601	1254.25	1151.4	-1.01301	2.02888	1.26331	1.02233	-0.974817	-0.996031	-0.604351	-0.298148	-0.545362	-0.597473	-0.553907	0.766689	-0.875907	-0.648628	1.13509	0.891329
APOM	13.5811	0.112753	0.107422	1.08759	0.276778	0.999738	14.3937	12.9785	18.6908	8.2649	7.3528	10.7989	12.8149	16.0533	18.1542	17.6355	13.8864	17.9397	3.7135	8.48118	22.3177	13.8223	0.164761	-0.122201	1.03608	-1.07796	-1.2629	-0.564156	-0.155369	0.501271	0.927265	0.822098	0.0618995	0.883768	-2.00084	-1.03411	1.77149	0.0488981
APOO	106.238	0.00926731	0.113421	0.0847325	0.932474	0.999738	93.559	86.9557	136.176	113.347	104.777	121.487	64.0745	78.9286	111.676	85.5055	133.017	141.723	91.9091	122.371	98.1979	116.107	-0.574711	-0.874016	1.35698	0.322224	-0.0662153	0.691181	-1.91115	-1.23786	0.246459	-0.939749	1.2138	1.60842	-0.649496	0.731259	-0.364446	0.447326
APOOL	647.799	0.0523981	0.0971398	0.53945	0.589576	0.999738	573.349	853.983	646.836	828.851	643.37	589.888	777.864	591.965	520.97	629	605.155	586.627	617.369	689.399	628.243	581.918	-0.788811	2.18455	-0.0102083	1.91827	-0.0469243	-0.613581	1.37805	-0.591575	-1.34377	-0.199179	-0.451821	-0.64813	-0.32241	0.440756	-0.207197	-0.698017
APOPT1	344.695	0.0886946	0.0894451	0.991754	0.321317	0.999738	351.446	380.269	342.442	327.054	334.553	414.406	474.151	351.834	311.922	293.925	295.269	334.575	446.548	261.705	286.782	308.237	0.115171	0.606881	-0.0384266	-0.300948	-0.173024	1.18924	2.20847	0.121795	-0.559097	-0.866109	-0.843188	-0.172648	1.73757	-1.41577	-0.987962	-0.621957
APP	23854.3	-0.00558499	0.0615058	-0.0865314	0.931044	0.999738	16004.6	31385.8	27371.4	27466.6	16398.6	16202.3	19377.4	26744.8	24263.3	25149.3	24725.8	26702.3	16076.7	25925.8	27424	30450.5	-1.48692	1.42664	0.666208	0.684253	-1.41229	-1.44946	-0.848032	0.547515	0.0774752	0.245301	0.165086	0.539469	-1.47327	0.392379	0.676177	1.24947
APPBP2	985.979	0.0242468	0.088983	0.272867	0.784955	0.999738	1033.95	838.409	923.86	1064.99	950.35	1023.19	882.946	806.677	1063.94	1174.1	1102.87	1023.46	783.548	1121.94	993.138	988.293	0.420003	-1.29211	-0.543905	0.691824	-0.311965	0.32583	-0.902145	-1.56995	0.682659	1.64715	1.02351	0.328157	-1.77246	1.19045	0.0626805	0.0202653
APPL1	935.231	-0.0226641	0.114276	-0.216104	0.828907	0.999738	1456.16	337.44	804.373	985.885	1376.81	1258.07	631.774	513.705	928.063	1096.61	1085.33	823.43	992.432	1118.3	826.871	728.435	1.72383	-1.97817	-0.433028	0.16762	1.46125	1.06831	-1.00418	-1.39489	-0.0237181	0.534019	0.496705	-0.369963	0.189288	0.605815	-0.358578	-0.684317
APPL2	808.64	-0.0309677	0.0998005	-0.305392	0.760068	0.999738	803.648	687.859	887.146	966.993	761.015	777.518	522.848	638.118	806.485	858.796	877.767	949.008	614.584	863.869	996.485	926.093	-0.0367564	-0.889385	0.578094	1.16606	-0.350688	-0.22917	-2.10447	-1.25566	-0.0158617	0.369335	0.509029	1.03362	-1.42895	0.40669	1.38323	0.864886
APRT	1300.27	0.04695	0.112158	0.424642	0.671097	0.999738	958.38	2851.37	1230.92	877.26	729.766	998.894	1855.6	1911.01	1139.86	1052.25	1089.72	1171.46	1428.77	1022.59	1106.96	1379.46	-0.654763	2.97059	-0.132802	-0.810119	-1.09259	-0.577172	1.06354	1.16966	-0.307198	-0.474984	-0.403233	-0.246685	0.2461	-0.531795	-0.370215	0.151675
APTR	189.153	0.0642535	0.110481	0.586474	0.557557	0.999738	207.509	315.377	124.16	115.709	158.085	205.178	308.839	342.47	186.493	135.206	114.746	132.753	255.303	126.006	127.211	171.396	0.238188	1.63784	-0.843317	-0.952985	-0.403119	0.207944	1.55301	1.9894	-0.0345112	-0.699998	-0.965481	-0.731816	0.858346	-0.819367	-0.803735	-0.230399
APTX	568.591	0.0248763	0.0745792	0.332803	0.739283	0.999738	579.346	645.03	520.673	528.954	639.694	596.637	725.323	567.885	505.016	533.341	539.377	498.722	666.573	531.891	490.989	528.011	0.157582	1.11999	-0.702116	-0.580782	1.04181	0.410929	2.29647	-0.010355	-0.931519	-0.516501	-0.428053	-1.02374	1.43565	-0.537738	-1.13704	-0.594588
AQP1	185.199	0.152595	0.106121	1.40843	0.159005	0.999738	38.3832	96.0407	83.4411	63.7578	56.9842	40.4957	65.356	456.181	519.87	408.823	459.713	70.8616	50.1322	443.445	55.7943	53.9069	-0.767322	-0.46598	-0.53183	-0.634704	-0.670105	-0.756281	-0.626351	1.41626	1.74913	1.16876	1.43473	-0.597576	-0.705917	1.3497	-0.676324	-0.686188
AQP10	2.31747	-0.0414625	0.0659593	-0.673624	0.50055	0.999738	1.19947	1.29785	1.33506	2.3614	0	1.34986	5.12596	6.01998	2.20051	2.13764	2.19259	0.896983	3.7135	3.63479	2.23177	1.38223	-0.704223	-0.642259	-0.61882	0.0276691	-1.45977	-0.609498	1.76905	2.33219	-0.0736775	-0.113278	-0.0786635	-0.894762	0.87935	0.829774	-0.0539844	-0.589107
AQP11	28.6339	0.106879	0.108498	0.987598	0.32335	0.999738	31.1863	37.6376	15.3532	16.5298	49.6314	21.5977	61.5115	39.4643	21.4549	26.1861	20.4642	25.1155	35.2782	21.8088	10.043	24.8801	0.190735	0.672814	-0.992427	-0.904501	1.56908	-0.525792	2.45684	0.809321	-0.536462	-0.182919	-0.610498	-0.262918	0.496509	-0.510022	-1.38924	-0.280509
AQP2	4.82285	0.0871728	0.0786036	1.1375	0.25533	0.999738	14.3937	2.59569	3.33765	2.3614	1.8382	10.7989	12.8149	4.01332	1.10025	5.87851	2.19259	3.58793	7.427	1.2116	2.23177	1.38223	2.23217	-0.51943	-0.346388	-0.574073	-0.696097	1.39376	1.86395	-0.188803	-0.868205	0.246206	-0.613444	-0.288014	0.607354	-0.842237	-0.604306	-0.802441
AQP3	24.3777	-0.0120052	0.108553	-0.126838	0.899069	0.999738	28.7874	15.5742	17.3558	16.5298	23.8966	45.8951	14.0964	35.451	39.6091	32.0646	14.6173	11.6608	38.9917	32.7131	14.5065	8.29337	0.373878	-0.746406	-0.595353	-0.665382	-0.0407865	1.82436	-0.871699	0.938852	1.2914	0.651734	-0.827536	-1.0782	1.23905	0.706723	-0.836927	-1.36371
AQP5	4.45727	0.0142191	0.0759017	0.173009	0.862644	0.999738	4.7979	2.59569	6.00776	2.3614	0	5.39943	3.84447	8.02664	6.60152	2.67205	8.0395	3.58793	2.78512	2.4232	1.11589	11.0578	0.116932	-0.639048	0.532258	-0.719477	-1.53011	0.323427	-0.210365	1.2253	0.736084	-0.612836	1.22972	-0.298429	-0.574019	-0.698263	-1.14704	2.26586
AQP6	3.25625	-0.0289568	0.0565821	-0.32254	0.747044	0.999738	2.39895	1.29785	0	3.5421	7.3528	0	2.56298	4.68221	2.20051	3.20646	2.92345	4.48491	14.854	1.2116	0	1.38223	-0.234375	-0.535402	-0.890216	0.078147	1.11994	-0.890216	-0.189532	0.389837	-0.288627	-0.0136133	-0.0909827	0.3359	3.17067	-0.558981	-0.890216	-0.512333
AQP7	0.149	0.00187415	0.0149914	0.128346	0.897875	0.999738	0	0	0	1.1807	0	0	0	0.668887	0	0.53441	0	0	0	0	0	0	-0.43353	-0.43353	-0.43353	3.00184	-0.43353	-0.43353	-0.43353	1.51266	-0.43353	1.12139	-0.43353	-0.43353	-0.43353	-0.43353	-0.43353	-0.43353
AQP7P1	11.2866	-0.102093	0.0878595	-0.817552	0.413613	0.999738	8.39632	12.9785	11.348	23.614	20.2202	12.1487	6.40745	0	1.10025	0	0.730863	23.3216	29.708	0	22.3177	8.29337	-0.290997	0.170347	0.00618587	1.24116	0.899466	0.0868046	-0.491243	-1.13636	-1.02559	-1.13636	-1.06278	1.21172	1.85472	-1.13636	1.11065	-0.301362
AQP7P3	0.520824	-0.0160127	0.0291127	-0.413932	0.678924	0.999738	0	0	0	0	0	1.34986	1.28149	0.668887	0	0	0	1.79397	1.85675	0	0	1.38223	-0.70666	-0.70666	-0.70666	-0.70666	-0.70666	1.12484	1.03208	0.200894	-0.70666	-0.70666	-0.70666	1.72742	1.8126	-0.70666	-0.70666	1.16877
AQP8	1.09136	-0.0276676	0.0498343	-0.673165	0.500843	0.999738	0	0	1.33506	1.1807	1.8382	0	0	2.67555	1.10025	2.13764	0.730863	0.896983	1.85675	1.2116	1.11589	1.38223	-1.34697	-1.34697	0.300781	0.11027	0.92177	-1.34697	-1.34697	1.95524	0.0109803	1.29134	-0.444928	-0.2399	0.944663	0.148404	0.0302736	0.359
AQP9	0.25357	-0.00939639	0.0151037	-0.473169	0.636093	0.999738	0	0	0	0	0	0	0	0	0	0	0	0.896983	0.928375	0	2.23177	0	-0.414319	-0.414319	-0.414319	-0.414319	-0.414319	-0.414319	-0.414319	-0.414319	-0.414319	-0.414319	-0.414319	1.0513	1.10259	-0.414319	3.23226	-0.414319
AQR	834.914	-0.0751587	0.115378	-0.658134	0.510452	0.999738	1144.3	441.268	781.009	833.574	1029.39	993.495	558.729	471.565	865.899	919.719	894.577	891.601	747.342	1025.01	966.356	794.781	1.54375	-1.96419	-0.268969	-0.00668326	0.970397	0.791277	-1.37809	-1.81301	0.154609	0.423155	0.297703	0.282854	-0.436961	0.948537	0.655864	-0.200249
AR	875.833	-0.0302857	0.0668999	-0.45922	0.646076	0.999738	1085.52	547.691	548.041	616.325	1045.94	1164.93	1128.99	926.408	974.824	992.933	1027.59	620.712	1087.13	1092.86	651.677	501.749	0.856464	-1.34026	-1.33883	-1.05993	0.694771	1.18077	1.034	0.206569	0.404321	0.478284	0.619854	-1.04201	0.863008	0.88643	-0.915541	-1.52791
ARAF	1798.22	-0.0407046	0.095256	-0.423497	0.671932	0.999738	1802.81	2438.65	2051.98	1405.03	1373.14	1600.93	1863.29	1841.44	1723.55	1655.07	1533.35	1917.75	1730.49	1635.66	2082.24	2116.19	0.0163665	2.28513	0.905447	-1.40294	-1.51676	-0.703961	0.232148	0.154218	-0.266455	-0.510799	-0.945091	0.426482	-0.241678	-0.580055	1.01341	1.13455
ARAP1	4648.28	-0.0164343	0.114154	-0.137454	0.890672	0.999738	3212.19	8072.61	4808.88	3688.51	3242.59	3367.89	5669.31	5981.85	4536.34	4174.27	3978.09	4344.09	4141.48	4610.13	5047.15	5497.12	-1.15752	2.76009	0.129446	-0.773602	-1.13303	-1.03202	0.822973	1.07489	-0.0902248	-0.382062	-0.540191	-0.245187	-0.408495	-0.0307518	0.321497	0.684188
ARAP2	4.69432	-0.0197655	0.0672974	-0.436577	0.662418	0.999738	5.99737	0	0	0	5.5146	5.39943	2.56298	2.67555	13.7532	10.6882	8.77036	0	2.78512	16.9624	0	0	0.24268	-0.874271	-0.874271	-0.874271	0.152769	0.131319	-0.396941	-0.375977	1.68712	1.1163	0.759122	-0.874271	-0.355569	2.2848	-0.874271	-0.874271
ARAP3	1610.38	-0.101374	0.0986069	-1.01201	0.311534	0.999738	803.648	2783.88	2086.03	1619.92	709.546	892.256	1055.95	1738.44	1495.79	1407.1	1467.57	2182.36	919.091	1547.21	2572.12	2485.25	-1.22746	1.78549	0.723699	0.0145091	-1.37064	-1.09264	-0.843585	0.194832	-0.174351	-0.3093	-0.217289	0.870268	-1.05181	-0.0961209	1.46329	1.33112
ARCN1	5577.9	-0.0293948	0.1134	-0.25548	0.798353	0.999738	6326.03	3510.68	6360.22	6950.78	5652.47	5874.58	3465.15	3724.36	5743.87	5794.07	6218.92	6426.88	4891.61	5945.31	6774.54	5586.97	0.672439	-1.85808	0.703168	1.23398	0.0670228	0.266662	-1.899	-1.66602	0.149179	0.194297	0.576164	0.763089	-0.616862	0.330237	1.07557	0.00814987
AREG	1083.8	0.0140394	0.114234	0.0815762	0.934984	0.999738	581.745	700.837	479.953	410.884	439.33	560.191	806.057	3458.81	1966.15	1952.2	1920.71	420.685	684.212	1965.21	434.079	559.803	-0.562973	-0.429432	-0.677115	-0.754565	-0.722667	-0.587143	-0.311446	2.66317	0.989404	0.973756	0.938447	-0.743575	-0.448074	0.988349	-0.728555	-0.587578
AREL1	1999.1	-0.121844	0.0838801	-1.45276	0.146291	0.999738	1941.95	1840.35	2090.03	1682.5	1999.96	2015.34	1681.31	1713.69	2073.98	2037.17	1979.18	2233.49	1731.42	2280.23	2516.32	2168.72	-0.243102	-0.675277	0.386788	-1.3467	0.00366323	0.0690585	-1.35174	-1.21403	0.31849	0.161925	-0.0847447	0.99698	-1.13861	1.19579	2.20004	0.721473
ARF1	11752.3	-0.0796156	0.0824864	-0.962559	0.335769	0.999738	11844.8	10395.8	13757.8	12501.3	10404.2	11402.2	8559.07	10338.3	12270	11287.3	11359.8	13651.2	12041	10922.6	13659.5	13641.2	0.0626031	-0.917488	1.35646	0.506597	-0.911763	-0.236734	-2.15976	-0.95634	0.350201	-0.314502	-0.265434	1.28437	0.195311	-0.561179	1.29003	1.27763
ARF3	6459.19	-0.0211222	0.047745	-0.44148	0.658866	0.999738	6340.42	6995.39	7008.39	6401.76	5838.13	6212.04	6807.27	5880.85	5995.28	6321.53	6172.87	6878.06	5925.82	6486.89	7035.66	7046.6	-0.267206	1.20642	1.23566	-0.129211	-1.39733	-0.556049	0.783162	-1.3012	-1.04375	-0.309711	-0.644178	0.942442	-1.20004	0.0623415	1.29701	1.32164
ARF4	4174.07	0.0722007	0.106624	0.688013	0.491445	0.999738	3893.49	3452.27	5166.01	6231.73	3635.96	3644.61	2682.16	3002.63	4308.59	4277.41	4458.27	5523.62	2737.78	4348.42	4831.78	4590.38	-0.284241	-0.731227	1.00489	2.08454	-0.545138	-0.536372	-1.5114	-1.18674	0.136277	0.104693	0.287909	1.36718	-1.45506	0.176631	0.666303	0.421749
ARF5	2241.88	0.066325	0.114109	0.583756	0.559384	0.999738	1905.96	3717.03	2223.54	1984.76	1681.95	1900.6	3040.97	3023.37	2092.68	2001.36	1907.55	1881.87	2307.94	1950.67	1953.91	2295.88	-0.611182	2.68398	-0.0333683	-0.467824	-1.01876	-0.620946	1.45392	1.42189	-0.271459	-0.437608	-0.608292	-0.655022	0.120194	-0.52984	-0.52394	0.0982559
ARF6	3546.04	0.0310998	0.0697627	0.44466	0.656566	0.999738	4037.43	3846.82	3298.26	3154.83	3669.05	3899.74	4745.35	3515.67	3090.06	3212.34	3289.62	3187.88	4320.66	3171.96	3123.36	3173.6	0.989868	0.605894	-0.499126	-0.788055	0.247794	0.712496	2.41592	-0.0611795	-0.918528	-0.672216	-0.51654	-0.721486	1.5604	-0.753544	-0.851445	-0.750252
ARFGAP1	5275.28	-0.00403109	0.112214	-0.03379	0.973045	0.999738	4427.26	8133.61	5172.68	4123	4205.8	4295.25	7018.72	6631.34	5199.25	4716.16	4350.1	4784.51	5427.28	5008.74	5040.45	5870.33	-0.750945	2.53113	-0.0908525	-1.02037	-0.947052	-0.867848	1.54386	1.20083	-0.0673303	-0.495113	-0.819274	-0.434594	0.134599	-0.236025	-0.207946	0.52693
ARFGAP2	2298.86	-0.062828	0.0891844	-0.707313	0.479372	0.999738	2485.31	2547.67	1942.51	1729.73	2531.2	2568.78	3270.36	2390.6	2016.76	2009.38	1996.72	1949.14	2692.29	2457.12	1972.88	2221.24	0.476606	0.636013	-0.910875	-1.45478	0.593912	0.68996	2.48331	0.234512	-0.72107	-0.739944	-0.772307	-0.893917	1.00567	0.404545	-0.833231	-0.198395
ARFGAP3	1529.95	-0.0031206	0.114758	-0.0214224	0.982909	0.999738	1526.93	878.642	1789.65	2052.06	1606.59	1452.45	921.391	1036.11	1656.43	1757.14	1732.15	1818.18	1160.47	1833.15	1644.81	1613.06	-0.00864147	-1.86445	0.74341	1.49459	0.219385	-0.221863	-1.74207	-1.41369	0.362067	0.650355	0.578812	0.825105	-1.05768	0.867939	0.328814	0.237915
ARFGEF1	1575.91	0.0165341	0.109028	0.150732	0.880187	0.999738	1829.2	1091.49	1552.01	1918.64	2022.02	1677.87	1194.35	1121.72	1461.14	1685.53	1726.3	1735.66	1508.61	1661.1	1637	1391.9	0.934977	-1.78815	-0.0882353	1.26513	1.64675	0.376382	-1.40847	-1.67655	-0.423663	0.404641	0.555143	0.589702	-0.248426	0.314471	0.225521	-0.67922
ARFGEF2	2242.55	-0.0784595	0.0884383	-0.881365	0.37812	0.999738	2185.44	2121.98	2549.29	2635.32	1911.73	1969.44	1567.26	1774.56	2095.43	2068.7	2249.6	2890.08	1743.49	2207.53	3165.77	2745.11	-0.128728	-0.271794	0.691509	0.885446	-0.745766	-0.615663	-1.52231	-1.055	-0.331641	-0.391904	0.0158986	1.45975	-1.12504	-0.0789338	2.08124	1.13293
ARFGEF3	7.9949	-0.180711	0.0945133	-1.79523	0.0726168	0.999738	9.5958	7.78708	7.34282	5.9035	14.7056	5.39943	5.12596	4.01332	1.65038	6.94732	4.38518	8.96983	19.4959	9.69278	4.46354	12.4401	0.354458	-0.0460148	-0.14438	-0.463064	1.48584	-0.574671	-0.635222	-0.881574	-1.40476	-0.231948	-0.799239	0.215861	2.54646	0.375932	-0.781889	0.984214
ARFIP1	664.943	0.0698335	0.100366	0.699881	0.484002	0.999738	675.304	568.457	718.261	958.728	733.442	608.786	649.715	505.678	602.939	647.704	602.231	783.963	503.179	693.034	631.591	756.079	0.0919072	-0.855892	0.472963	2.60605	0.607626	-0.498152	-0.135083	-1.41278	-0.550018	-0.152919	-0.556291	1.05578	-1.43494	0.24918	-0.295855	0.808429
ARFIP2	1146.9	-0.0356488	0.0899987	-0.392138	0.694956	0.999738	931.992	1635.29	1236.26	1053.18	863.954	961.098	1166.16	1199.98	1088.15	1070.96	1054.64	1275.51	1054.63	1114.67	1188.42	1455.49	-1.11223	2.52761	0.462502	-0.485009	-1.46435	-0.961592	0.0996607	0.274731	-0.304047	-0.39303	-0.477497	0.665614	-0.477509	-0.166797	0.214878	1.59707
ARFRP1	1275.01	0.0585467	0.115272	0.511374	0.609089	0.999738	1153.89	2058.38	1152.16	1056.73	1207.7	1168.98	2158.03	1612.69	1060.64	935.217	852.187	1136.48	1504.9	988.664	1079.06	1274.41	-0.321155	2.0773	-0.325767	-0.578817	-0.178484	-0.281163	2.34152	0.895428	-0.56843	-0.901027	-1.1212	-0.367341	0.609599	-0.759301	-0.519593	-0.00156965
ARG1	1.00865	-0.0419621	0.0369493	-0.973955	0.330079	0.999738	0	0	0.667529	0	3.6764	0	0	1.33777	0.550127	1.60323	0	0.896983	4.64187	0	0	2.76446	-0.686935	-0.686935	-0.232317	-0.686935	1.81686	-0.686935	-0.686935	0.224149	-0.312274	0.404936	-0.686935	-0.0760492	2.47439	-0.686935	-0.686935	1.19578
ARG2	131.09	0.0821655	0.103087	0.80467	0.42101	0.999738	113.95	123.295	176.895	167.659	102.939	91.7903	74.3264	130.433	151.285	159.788	149.827	134.547	64.9862	146.603	158.456	150.663	-0.513905	-0.233708	1.37334	1.09643	-0.844035	-1.17831	-1.70192	-0.019711	0.605479	0.860439	0.561771	0.103653	-1.98196	0.465117	0.820479	0.586834
ARGFX	0.405773	0.00320621	0.0245102	0.0288203	0.977008	0.999738	0	0	0	0	1.8382	0	0	2.00666	0	0.53441	0.730863	0	0	0	0	1.38223	-0.57379	-0.57379	-0.57379	-0.57379	2.02555	-0.57379	-0.57379	2.26376	-0.57379	0.181901	0.4597	-0.57379	-0.57379	-0.57379	-0.57379	1.38077
ARGFXP2	5.99226	-0.130762	0.0863768	-1.51416	0.129986	0.999738	9.5958	2.59569	3.33765	3.5421	14.7056	5.39943	8.97042	5.35109	4.95114	2.13764	2.92345	1.79397	12.0689	4.84639	12.2747	1.38223	0.857219	-0.807986	-0.631489	-0.582852	2.07276	-0.141025	0.708454	-0.152524	-0.247666	-0.91695	-0.730018	-0.998704	1.44552	-0.272584	1.49449	-1.09665
ARGLU1	826.499	0.0835446	0.113621	0.735413	0.462088	0.999738	686.099	1258.91	765.656	981.162	775.721	776.168	1120.02	1001.99	730.018	714.506	687.012	641.343	1063.92	696.669	617.084	707.701	-0.724593	2.23166	-0.314007	0.798207	-0.262062	-0.259755	1.51486	0.905711	-0.497932	-0.577991	-0.719885	-0.95558	1.2253	-0.670046	-1.08078	-0.613108
ARHGAP1	4850.68	-0.110009	0.0831852	-1.32051	0.186666	0.999738	4749.92	5676.78	5427.01	3846.72	3691.11	4639.46	4400.63	4694.25	4804.25	4675.55	4659.99	5222.23	4712.43	4776.12	6137.37	5497.12	-0.159933	1.31118	0.914745	-1.59349	-1.84047	-0.335255	-0.714317	-0.248298	-0.0736918	-0.277973	-0.302676	0.589723	-0.219436	-0.118351	2.04222	1.02603
ARHGAP10	742.774	0.00854037	0.106515	0.0792293	0.93685	0.999738	790.454	506.16	778.339	838.297	941.159	819.363	601.018	550.494	777.879	751.914	759.367	830.606	661.931	862.657	720.862	693.879	0.40883	-2.02883	0.304953	0.819062	1.70105	0.656715	-1.21548	-1.6487	0.301008	0.078375	0.14228	0.753116	-0.693182	1.02794	-0.187884	-0.419248
ARHGAP11A	2294.43	0.0449131	0.10322	0.422977	0.672312	0.999738	3551.64	1384.8	1471.23	2392.1	3674.56	3435.39	3768.86	1603.99	1601.42	1944.72	1830.81	1681.84	3344.93	2214.8	1310.05	1499.72	1.35803	-0.982567	-0.889204	0.105501	1.4908	1.23245	1.59266	-0.745803	-0.748581	-0.377755	-0.500792	-0.661708	1.13474	-0.0860142	-1.06331	-0.858436
ARHGAP11B	186.858	0.179207	0.115345	1.54507	0.12233	0.999738	218.304	59.701	108.807	116.889	330.876	265.922	173.001	232.104	263.511	223.383	231.684	180.294	256.231	169.624	79.2278	80.1693	0.395736	-1.60021	-0.982228	-0.88052	1.81239	0.994978	-0.174382	0.569393	0.964633	0.459651	0.564109	-0.08261	0.873028	-0.216885	-1.35447	-1.34262
ARHGAP12	620.807	0.019262	0.113335	0.169963	0.865039	0.999738	626.126	281.633	619.467	936.295	641.532	692.477	256.298	411.365	724.517	852.383	770.33	696.956	542.171	731.805	621.548	528.011	0.0286607	-1.82772	-0.00722131	1.70008	0.111682	0.386209	-1.96424	-1.12863	0.558864	1.2479	0.80574	0.410345	-0.42375	0.598138	0.00399247	-0.500052
[truncated: 25,265 more rows]
