# Supplementary material for: Adventitial fibroblasts direct smooth muscle cell-state transition in pulmonary vascular disease
Source: bioRxiv preprint, doi:10.1101/2024.05.15.594343, version 4 (2025-02-20)
Supplement: transcriptomic dataset [file 594343_file03.xlsx]

## Sheet: array
designID	072363
name	Agilent-072363:Catalog gene expression microarray for Human, v3 8x60K
spotCount	62976
rowCount	328
colCount	192

## Sheet: targets|design
Targets					Design
FILENAME	ID	TARGET	DYE	LABEL	Fib_donor	Fib_IPAH	PASMC_donor	PASMC_IPAH
257236316977_b1.gpr	5	Fib_IPAH	Cy3	5	0	1	0	0
257236316977_b2.gpr	11	PASMC_donor	Cy3	11	0	0	1	0
257236316977_b3.gpr	12	PASMC_donor	Cy3	12	0	0	1	0
257236316977_b4.gpr	6	Fib_IPAH	Cy3	6	0	1	0	0
257236316977_b5.gpr	13	PASMC_IPAH	Cy3	13	0	0	0	1
257236316977_b6.gpr	3	Fib_donor	Cy3	3	1	0	0	0
257236316977_b7.gpr	4	Fib_donor	Cy3	4	1	0	0	0
257236316977_b8.gpr	14	PASMC_IPAH	Cy3	14	0	0	0	1
257236316978_b1.gpr	15	PASMC_IPAH	Cy3	15	0	0	0	1
257236316978_b3.gpr	2	Fib_donor	Cy3	2	1	0	0	0
257236316978_b4.gpr	16	PASMC_IPAH	Cy3	16	0	0	0	1
257236316978_b5.gpr	7	Fib_IPAH	Cy3	7	0	1	0	0
257236316978_b6.gpr	9	PASMC_donor	Cy3	9	0	0	1	0
257236316978_b7.gpr	10	PASMC_donor	Cy3	10	0	0	1	0
257236316978_b8.gpr	8	Fib_IPAH	Cy3	8	0	1	0	0

## Sheet: processing
read.gpr(targets=, path=".", badFlagID=-100)
setAnnotations(object=Eraw, ann.path=getOption("annotationPath"))
createEList(object=Eraw[, Eraw$targets$ID != "1"], badSpotsFactor=4, bc=TRUE, bc.offset=1)
normalizeE(object=E, by=NA)
averageSpots(object=E)
uniqueFeatures(object=E, by="ENTREZ_ID", keep="max")
fitModel(object=E, arrWts=FALSE, paired=NULL, model=NULL, design=NULL)
fitContrasts(object=fit, contrMat=NULL)
eBayes(object)

## Sheet: annotation
	Date	Organism	URL
biomart	2016-02-23 09:28:42	hsa	http://www.ensembl.org/biomart/
mirTargets	2016-02-23 09:29:29	hsa	http://mirdb.org/miRDB/download/miRDB_v5.0_prediction_result.txt.gz
tfTargets	2016-02-23 09:29:52	hsa	http://itfp.biosino.org/itfp/system_data/human/human.zip
kegg	2016-02-23 09:29:06	hsa	http://rest.kegg.jp/link/pathway/hsa
go	2016-02-23 09:29:01	hsa	ftp://ftp.ncbi.nlm.nih.gov/gene/DATA/gene2go.gz

## Sheet: contrasts
	PASMC_IPAH - PASMC_donor	Fib_IPAH - Fib_donor	PASMC_donor - Fib_donor	(PASMC_IPAH - PASMC_donor) - (Fib_IPAH - Fib_donor)
Fib_donor	0	-1	-1	1
Fib_IPAH	0	1	0	-1
PASMC_donor	-1	0	1	-1
PASMC_IPAH	1	0	0	1

## Sheet: data
	Annotations								Coefficients (LFC)				Confidence interval (half width)				Significance (-log P)				Anova	Mean	mean E-values by target
GENE_LABEL	GENE_NAME	BIOTYPE	ENSEMBL_GENE_ID	ENTREZ_ID	KEGG_IDS	GO_IDS	MIR_IDS	TF_IDS	PASMC_IPAH - PASMC_donor	Fib_IPAH - Fib_donor	PASMC_donor - Fib_donor	(PASMC_IPAH - PASMC_donor) - (Fib_IPAH - Fib_donor)	PASMC_IPAH - PASMC_donor	Fib_IPAH - Fib_donor	PASMC_donor - Fib_donor	(PASMC_IPAH - PASMC_donor) - (Fib_IPAH - Fib_donor)	PASMC_IPAH - PASMC_donor	Fib_IPAH - Fib_donor	PASMC_donor - Fib_donor	(PASMC_IPAH - PASMC_donor) - (Fib_IPAH - Fib_donor)	(-log P)	Expr.	Fib_IPAH	PASMC_donor	PASMC_IPAH	Fib_donor
BLID	BH3-like motif containing, cell death inducer	protein coding	ENSG00000259571	414899			miR-1229-5p|miR-1237-3p|miR-193a-5p|miR-197-5p|miR-3115|miR-3132|miR-3140-5p|miR-4293|miR-6124|miR-6868-3p		-2.3	-0.66	4.29	-1.65	0.67	0.72	0.72	0.99	5.82	1.14	9.15	2.57	9.94	5.18	3.01965	7.96883	5.66425	3.67713
SBSN	suprabasin	protein coding	ENSG00000189001	374897		GO:0070062	miR-3591-5p		2.18	-1.37	-4.92	3.55	0.69	0.75	0.75	1.02	5.32	2.9	9.84	5.89	9.07	7.2	8.23966	4.69475	6.87061	9.61387
A_22_P00023347		(NA)							-1.89	-0.02	2.6	-1.87	0.61	0.66	0.66	0.9	5.23	0.02	6.6	3.38	6.67	3.6	2.70193	5.32025	3.4341	2.71788
Hs.716456		(NA)							1.41	-0.5	-2.12	1.91	0.46	0.5	0.5	0.68	5.16	1.31	7.05	4.74	6.4	4.01	4.39874	2.77868	4.18836	4.90125
Hs.677218		(NA)							-1.7	-0.04	3.09	-1.66	0.57	0.61	0.61	0.83	5.1	0.05	8.13	3.22	8.28	3.21	1.99197	5.11884	3.41671	2.03265
Hs.440049		(NA)							-1.7	-0.69	0.66	-1.01	0.57	0.62	0.62	0.84	5.04	1.51	1.41	1.67	4.32	4.18	3.77653	5.12263	3.42363	4.46664
A_21_P0009512		(NA)							-1.45	-0.26	1.47	-1.19	0.51	0.55	0.55	0.75	4.84	0.49	4.53	2.42	5.2	2.82	2.22879	3.96597	2.51267	2.49133
Hs.667221		(NA)							-1.67	-0.67	0.76	-1	0.59	0.64	0.64	0.87	4.76	1.39	1.65	1.56	4.12	3.02	2.56263	3.99712	2.3286	3.23346
SPATA6	spermatogenesis associated 6	protein coding	ENSG00000132122	54558		GO:0007283|GO:0044458|GO:0097224	let-7c-3p|miR-1185-5p|miR-1246|miR-1250-3p|miR-1253|miR-1255b-2-3p|miR-1257|miR-1297|miR-140-5p|miR-196a-5p|miR-196b-5p|miR-198|miR-203a-5p|miR-2054|miR-218-1-3p|miR-31-3p|miR-3117-5p|miR-3134|miR-3148|miR-3174|miR-3182|miR-320a|miR-320b|miR-320c|miR-320d|miR-328-3p|miR-3622b-5p|miR-3679-5p|miR-3686|miR-370-5p|miR-3919|miR-4251|miR-4261|miR-4275|miR-4422|miR-4429|miR-4433b-3p|miR-4447|miR-4461|mi…		-1.58	-0.46	-1.11	-1.12	0.58	0.63	0.63	0.85	4.6	0.86	2.77	1.87	6.58	4.05	4.72391	4.07894	2.49732	5.18727
LRRC1	leucine rich repeat containing 1	protein coding	ENSG00000137269	55227			miR-1193|miR-124-3p|miR-142-3p|miR-150-3p|miR-188-5p|miR-196b-3p|miR-199a-3p|miR-199b-3p|miR-22-3p|miR-223-5p|miR-2467-5p|miR-3129-5p|miR-3163|miR-374b-3p|miR-384|miR-431-3p|miR-432-5p|miR-4325|miR-4459|miR-4531|miR-4719|miR-506-3p|miR-544a|miR-548c-3p|miR-5582-5p|miR-5689|miR-630|miR-6768-5p|miR-6793-3p|miR-6866-3p|miR-6885-3p|miR-7-5p|miR-8084|miR-892c-5p	ANKRD28|DMWD|DRAP1|NCOA2|OSBPL9|SFPQ|TIA1|TRIM13|WDR89|ZNF564|ZNF638	-2.01	-0.36	0.92	-1.65	0.74	0.8	0.8	1.09	4.6	0.45	1.57	2.29	3.59	4.45	4.23483	5.51146	3.49858	4.59503
A_21_P0013323		(NA)							-1.63	0.13	1.09	-1.76	0.6	0.65	0.65	0.88	4.59	0.17	2.6	3.21	3.58	3.35	3.29376	4.25384	2.62323	3.16592
A_24_P237757		(NA)							-1.63	-0.24	2.01	-1.38	0.61	0.66	0.66	0.9	4.46	0.35	5.14	2.3	5.53	5.92	5.10539	7.36158	5.73557	5.34845
A_33_P3214785		(NA)							-1.96	-1.03	1.54	-0.94	0.75	0.8	0.8	1.1	4.44	1.81	3.05	1.05	4.93	4.09	3.03759	5.60233	3.63737	4.06431
LOC101927482	uncharacterized LOC101927482	asRNA	ENSG00000229056	101927482					1.99	0.05	-1	1.94	0.76	0.82	0.82	1.12	4.41	0.05	1.71	2.71	3.33	3.45	3.49079	2.43963	4.43012	3.4418
SYTL1	synaptotagmin-like 1	protein coding	ENSG00000142765	84958		GO:0005515|GO:0005886|GO:0006887|GO:0019897|GO:0042043|GO:0042470|GO:0070062			-1.74	-0.46	-0.63	-1.28	0.67	0.73	0.73	0.99	4.34	0.7	1.06	1.84	5.01	4.54	4.99922	4.83041	3.09231	5.45794
Hs.711081		(NA)							-1.46	0.15	1.28	-1.61	0.57	0.61	0.61	0.84	4.33	0.21	3.38	3.09	3.66	2.88	2.70119	3.82696	2.36367	2.55149
Hs.738422		(NA)							-2.78	-0.61	4.22	-2.17	1.08	1.17	1.17	1.59	4.31	0.54	6.1	1.98	6.61	4.41	2.45247	7.27807	4.49847	3.05905
NDUFV2-AS1	NDUFV2 antisense RNA 1	asRNA	ENSG00000266053	101927275					1.65	-0.33	-0.87	1.98	0.65	0.7	0.7	0.95	4.3	0.48	1.76	3.4	3.33	3.2	2.98538	2.44652	4.09992	3.31574
GOLGA8A	golgin A8 family, member A	protein coding	ENSG00000215252	23015		GO:0005737|GO:0005794			-2.27	-0.62	2.16	-1.65	0.89	0.96	0.96	1.31	4.27	0.72	3.71	1.77	4.59	4.49	3.48013	6.26955	3.99956	4.10506
SNORD123	small nucleolar RNA, C/D box 123	other ncRNA							-1.4	0.32	1.72	-1.72	0.55	0.6	0.6	0.81	4.24	0.57	4.87	3.45	4.47	3.08	2.77247	4.1669	2.76729	2.45023
CTSC	cathepsin C	protein coding	ENSG00000109861	1075	04142	GO:0000139|GO:0005515|GO:0005615|GO:0005764|GO:0005788|GO:0006508|GO:0006888|GO:0006955|GO:0008234|GO:0016020|GO:0018279|GO:0019902|GO:0030134|GO:0033116|GO:0043687|GO:0044267|GO:0048208|GO:0051087|GO:0061024|GO:0070062|GO:1903052	miR-1205|miR-1236-3p|miR-1260a|miR-1260b|miR-1264|miR-1277-5p|miR-135a-3p|miR-137|miR-198|miR-23a-5p|miR-23b-5p|miR-24-1-5p|miR-24-2-5p|miR-302f|miR-3123|miR-3133|miR-3157-3p|miR-3159|miR-345-3p|miR-3613-3p|miR-425-5p|miR-4283|miR-4316|miR-4330|miR-4426|miR-4441|miR-4514|miR-4516|miR-4647|miR-4662b|miR-4692|miR-4775|miR-511-5p|miR-548c-3p|miR-548u|miR-561-5p|miR-578|miR-6077|miR-6126|miR-670-5p|m…	ARPC1B|RCOR3|TGFB1|WDR1	1.53	0.13	-1.03	1.4	0.61	0.66	0.66	0.9	4.21	0.17	2.38	2.36	3.35	10.48	10.7162	9.55232	11.0824	10.5844
PHLPP1	PH domain and leucine rich repeat protein phosphatase 1	protein coding	ENSG00000081913	23239	04151	GO:0005515|GO:0005829|GO:0007173|GO:0008543|GO:0038095|GO:0042981|GO:0043408|GO:0045087|GO:0046328|GO:0048011|GO:0048015|GO:0051898|GO:1900744	miR-126-5p|miR-1275|miR-1277-5p|miR-1279|miR-1283|miR-1284|miR-141-3p|miR-16-2-3p|miR-186-3p|miR-190a-5p|miR-190b|miR-195-3p|miR-200a-3p|miR-2113|miR-2117|miR-224-5p|miR-26b-3p|miR-29b-1-5p|miR-3164|miR-3173-5p|miR-3175|miR-331-3p|miR-338-5p|miR-34c-3p|miR-3529-3p|miR-3606-3p|miR-3622a-3p|miR-3622b-3p|miR-3660|miR-3679-3p|miR-3686|miR-3912-5p|miR-3918|miR-3919|miR-4273|miR-4276|miR-4278|miR-4297|…		-1.24	0.05	0.76	-1.3	0.5	0.54	0.54	0.74	4.16	0.08	2.08	2.76	3.13	3.42	3.38544	4.09752	2.85366	3.33265
Hs.719438		(NA)							-1.63	-0.53	3	-1.1	0.67	0.73	0.73	0.99	4.05	0.85	6.88	1.5	7.65	6.05	4.49966	8.03238	6.39781	5.0317
CALB2	calbindin 2	protein coding	ENSG00000172137	794		GO:0005737	miR-1205|miR-1275|miR-154-3p|miR-186-3p|miR-1909-3p|miR-3194-3p|miR-3921|miR-4297|miR-4311|miR-4483|miR-4516|miR-4651|miR-4653-5p|miR-4763-3p|miR-487a-3p|miR-490-3p|miR-5581-5p|miR-608|miR-619-3p|miR-6722-3p|miR-6782-5p|miR-6809-5p|miR-6811-5p|miR-6867-5p|miR-9-5p		1.49	0.24	-0.02	1.25	0.62	0.67	0.67	0.91	4.03	0.34	0.03	2.01	3.58	2.89	2.68029	2.41413	3.90599	2.4391
WWC3-AS1	WWC3 antisense RNA 1	asRNA	ENSG00000225076						-1.22	0.09	1.42	-1.31	0.51	0.55	0.55	0.74	4.03	0.13	4.37	2.75	4.26	5.55	5.17881	6.51011	5.28839	5.09091
A_33_P3324675		(NA)							-3.22	-0.36	3.15	-2.86	1.33	1.44	1.44	1.96	4.03	0.22	3.6	2.16	4	4.38	3.29613	6.80308	3.58518	3.65251
SNORD63	small nucleolar RNA, C/D box 63	other ncRNA	ENSG00000206989	26785					-1.46	0.4	1.42	-1.86	0.61	0.65	0.65	0.89	4.02	0.67	3.55	3.4	3.46	3.63	3.55211	4.57198	3.1094	3.15343
ENSG00000187229		asRNA	ENSG00000187229						-1.46	0.07	1.25	-1.53	0.61	0.66	0.66	0.89	4.01	0.09	3.03	2.67	3.35	2.82	2.60159	3.77524	2.31479	2.52918
Hs.520751		(NA)							-2.32	-0.32	2.16	-2	0.97	1.04	1.04	1.42	4.01	0.28	3.37	2.07	3.88	4.12	3.34929	5.82983	3.50532	3.6698
LOC100128361	uncharacterized LOC100128361	lncRNA							1.28	1.34	-0.09	-0.06	0.54	0.58	0.58	0.79	3.99	3.84	0.13	0.06	4.59	3.53	4.22354	2.78939	4.07204	2.88212
SHROOM3	shroom family member 3	protein coding	ENSG00000138771	57619	04530	GO:0000902|GO:0005856|GO:0005912|GO:0007389|GO:0016324|GO:0043296|GO:0043482|GO:0045176	miR-1252-5p|miR-140-5p|miR-153-5p|miR-186-3p|miR-205-5p|miR-2053|miR-30c-1-3p|miR-30c-2-3p|miR-3170|miR-324-5p|miR-329-5p|miR-3656|miR-3671|miR-370-3p|miR-3942-3p|miR-3973|miR-4252|miR-4254|miR-4256|miR-4257|miR-4297|miR-4306|miR-4318|miR-4328|miR-4422|miR-4476|miR-4493|miR-4499|miR-4516|miR-4524b-3p|miR-4530|miR-4691-3p|miR-4701-5p|miR-4711-3p|miR-4717-5p|miR-4762-3p|miR-4796-5p|miR-4999-3p|miR-…	CCNB2|FGD2|VAC14	-2.24	0.16	2.29	-2.4	0.94	1.01	1.01	1.38	3.99	0.12	3.74	2.71	3.75	4.41	3.90114	6.03821	3.79363	3.74611
Hs.512767		(NA)							-1.73	0.83	2.14	-2.57	0.72	0.78	0.78	1.06	3.99	1.42	4.63	4.02	4.02	4.22	4.14761	5.45555	3.72247	3.31493
A_21_P0010044		(NA)							-1.69	-0.18	2.49	-1.51	0.71	0.77	0.77	1.05	3.96	0.21	5.49	2.13	5.7	7.14	6.13013	8.79963	7.10918	6.3133
FILIP1L	filamin A interacting protein 1-like	protein coding	ENSG00000168386	11259					-1.61	0.05	-1.04	-1.66	0.68	0.74	0.74	1	3.92	0.06	2.08	2.55	6.15	6.06	7.0851	5.99026	4.38304	7.03193
CMKLR1	chemokine-like receptor 1	protein coding	ENSG00000174600	1240		GO:0001501|GO:0004872|GO:0004950|GO:0005515|GO:0005886|GO:0005887|GO:0006935|GO:0006955|GO:0007186|GO:0010759|GO:0032088|GO:0032695|GO:0045600|GO:0050848|GO:0070098	miR-106a-5p|miR-106b-5p|miR-1205|miR-124-3p|miR-1252-3p|miR-1266-5p|miR-1285-3p|miR-129-5p|miR-1321|miR-152-5p|miR-1587|miR-15a-5p|miR-15b-5p|miR-16-5p|miR-17-5p|miR-186-3p|miR-195-5p|miR-204-5p|miR-20a-3p|miR-20a-5p|miR-20b-5p|miR-211-5p|miR-22-3p|miR-2355-3p|miR-27a-3p|miR-27b-3p|miR-302a-3p|miR-302b-3p|miR-302c-3p|miR-302d-3p|miR-302e|miR-3173-3p|miR-3183|miR-3185|miR-3187-5p|miR-3189-3p|miR-3…		2.76	-0.39	-0.28	3.15	1.18	1.27	1.27	1.74	3.89	0.27	0.19	2.86	3.66	3.43	2.56137	2.66698	5.42912	2.94673
LOC102723376	uncharacterized LOC102723376	lncRNA							1.74	0.79	-0.1	0.95	0.74	0.8	0.8	1.09	3.87	1.27	0.1	1.07	3.28	3.44	3.61528	2.72084	4.45683	2.82492
ADM	adrenomedullin	protein coding	ENSG00000148926	133		GO:0001570|GO:0002031|GO:0005102|GO:0005515|GO:0005576|GO:0005615|GO:0005737|GO:0006171|GO:0006701|GO:0007165|GO:0007267|GO:0008015|GO:0019731|GO:0030819|GO:0031623|GO:0045906|GO:0050829|GO:0050830	let-7f-2-3p|miR-1185-1-3p|miR-1185-2-3p|miR-1277-5p|miR-1297|miR-181a-5p|miR-181b-5p|miR-181c-5p|miR-181d-5p|miR-26a-5p|miR-26b-5p|miR-302f|miR-3065-5p|miR-3121-3p|miR-329-5p|miR-338-5p|miR-361-3p|miR-3613-3p|miR-365a-3p|miR-365b-3p|miR-3675-3p|miR-374c-5p|miR-3943|miR-3978|miR-410-3p|miR-4262|miR-4296|miR-4316|miR-4325|miR-4329|miR-4465|miR-4495|miR-4666a-3p|miR-4670-3p|miR-4708-3p|miR-5004-5p|m…		-1.6	-0.22	-1.5	-1.38	0.69	0.75	0.75	1.02	3.84	0.27	3.24	1.96	6.73	11.59	12.6516	11.378	9.77502	12.8764
RNF180	ring finger protein 180	protein coding	ENSG00000164197	285671				ABT1|EIF4A3|LIMCH1|PDRG1	-1.26	0.02	2.31	-1.28	0.54	0.59	0.59	0.8	3.84	0.02	6.58	2.43	6.59	6.79	5.9063	8.19668	6.9338	5.89079
Hs.720286		(NA)							-1.89	-0.5	1.81	-1.38	0.82	0.88	0.88	1.2	3.83	0.61	3.32	1.58	4.07	3.46	2.62613	4.93551	3.04997	3.12864
Hs.667154		(NA)							-1.56	0.48	3	-2.04	0.67	0.73	0.73	0.99	3.83	0.74	6.87	3.33	6.39	4.6	3.76534	6.28722	4.72905	3.28453
TTC31	tetratricopeptide repeat domain 31	protein coding	ENSG00000115282	64427			miR-1180-5p|miR-133a-5p|miR-153-5p|miR-185-3p|miR-188-5p|miR-1911-3p|miR-224-5p|miR-3123|miR-3166|miR-3188|miR-4251|miR-4519|miR-4531|miR-4638-3p|miR-4793-5p|miR-548a-3p|miR-548f-3p|miR-552-3p|miR-589-5p|miR-616-5p|miR-6730-5p|miR-6840-3p|miR-6846-5p|miR-6848-5p|miR-6863|miR-6866-3p|miR-6871-3p|miR-7110-3p|miR-7114-3p		1.9	0.32	-1.24	1.58	0.83	0.89	0.89	1.22	3.8	0.33	2.01	1.85	3.02	3.67	4.05242	2.49747	4.39768	3.73407
MDH1B	malate dehydrogenase 1B, NAD (soluble)	protein coding	ENSG00000138400	130752				APBB3	-1.46	-0.1	2.93	-1.36	0.63	0.68	0.68	0.93	3.8	0.12	7.09	2.15	7.33	6.69	5.44389	8.46859	7.01255	5.54309
KRT73-AS1	KRT73 antisense RNA 1	asRNA	ENSG00000257495	100127967					1.21	0.1	-0.35	1.11	0.53	0.57	0.57	0.77	3.79	0.15	0.68	2.1	2.86	3.1	3.03545	2.58259	3.78846	2.9348
A_21_P0005725		(NA)							-1.02	0.6	1.1	-1.61	0.44	0.48	0.48	0.65	3.79	1.74	3.78	4.12	3.48	2.77	2.89401	3.39491	2.37651	2.29754
Hs.656323		(NA)							-1.5	-0.03	1.15	-1.47	0.66	0.71	0.71	0.97	3.78	0.04	2.49	2.28	3.03	3.55	3.31247	4.50167	2.99958	3.34732
LINC01004	lincRNA 1004	lincRNA							-1.86	-0.21	2.73	-1.66	0.81	0.88	0.88	1.2	3.78	0.21	5.27	2.01	5.46	3.98	2.86951	5.81087	3.94701	3.07818
A_22_P00006224		(NA)							-1.94	0.17	2.37	-2.11	0.85	0.91	0.91	1.25	3.78	0.16	4.36	2.62	4.16	4.18	3.56072	5.75841	3.82311	3.38721
ASAP1-IT1	ASAP1 intronic transcript 1 (non-protein coding)	lncRNA							-1.61	-0.2	2.76	-1.41	0.71	0.76	0.76	1.04	3.77	0.23	6.13	1.96	6.39	5.14	3.94809	6.91148	5.3038	4.14767
A_21_P0014122		(NA)							-1.53	0.25	0.89	-1.77	0.67	0.72	0.72	0.98	3.77	0.32	1.74	2.83	2.77	2.78	2.89456	3.54268	2.01684	2.64897
Hs.483238		(NA)							-1.98	0.23	2.66	-2.21	0.87	0.94	0.94	1.29	3.74	0.21	4.76	2.67	4.48	3.22	2.4985	4.92635	2.94619	2.26874
BNIP3	BCL2/adenovirus E1B 19kDa interacting protein 3	protein coding	ENSG00000176171	664	04068|05134	GO:0001666|GO:0005515|GO:0005634|GO:0005635|GO:0005654|GO:0005737|GO:0005739|GO:0005741|GO:0006915|GO:0008219|GO:0008626|GO:0010508|GO:0010637|GO:0016239|GO:0030425|GO:0031307|GO:0031966|GO:0035694|GO:0042802|GO:0042803|GO:0043065|GO:0043066|GO:0043068|GO:0043243|GO:0043653|GO:0045837|GO:0046902|GO:0046982|GO:0051020|GO:0051402|GO:0051607|GO:0060548|GO:0071279|GO:0071456|GO:0072593|GO:0090141|GO:…	miR-1267|miR-145-5p|miR-26a-1-3p|miR-26a-2-3p|miR-27a-3p|miR-27b-3p|miR-29a-5p|miR-320a|miR-320b|miR-320c|miR-320d|miR-3591-5p|miR-3646|miR-3689a-5p|miR-3689b-5p|miR-3689e|miR-3689f|miR-3942-3p|miR-411-5p|miR-4291|miR-4310|miR-4429|miR-451b|miR-4680-3p|miR-4699-3p|miR-4717-5p|miR-4753-5p|miR-4765|miR-5011-5p|miR-5195-3p|miR-583|miR-6074|miR-6083|miR-6124|miR-622|miR-6515-3p|miR-6719-3p|miR-6835-3…		-1.27	-0.01	-0.03	-1.27	0.56	0.61	0.61	0.83	3.73	0.01	0.04	2.3	3.6	10.38	10.7297	10.7007	9.43026	10.735
DNAJA4	DnaJ (Hsp40) homolog, subfamily A, member 4	protein coding	ENSG00000140403	55466		GO:0005515|GO:0005829|GO:0016020|GO:0042026|GO:0051082|GO:0051087|GO:0090084	miR-1227-5p|miR-1250-3p|miR-1273h-3p|miR-140-3p|miR-141-3p|miR-181a-5p|miR-181b-5p|miR-181c-5p|miR-181d-5p|miR-200a-3p|miR-2110|miR-3160-3p|miR-3192-5p|miR-335-3p|miR-3609|miR-3922-5p|miR-3942-5p|miR-421|miR-4262|miR-4267|miR-4269|miR-4289|miR-4457|miR-4504|miR-4667-3p|miR-4703-5p|miR-4742-5p|miR-4766-3p|miR-4771|miR-4775|miR-512-5p|miR-520g-5p|miR-548ah-5p|miR-552-3p|miR-590-3p|miR-6505-5p|miR-6…	ANKRD15|CHERP|DISC1|E2F4|EHMT1|IGHMBP2|INHBC|KRT7|LIMD1|NCAPD2|NLRP1|PAX8|PKNOX2|RAI1|STRN4|TTC13|XDH|ZNF628	1.11	0.59	-0.8	0.53	0.5	0.53	0.53	0.73	3.71	1.48	2.23	0.83	3.92	5.14	5.69797	4.31045	5.42454	5.10948
TRAPPC3L	trafficking protein particle complex 3-like	protein coding	ENSG00000173626	100128327			miR-2392|miR-28-5p|miR-3064-5p|miR-3134|miR-3138|miR-3139|miR-3173-5p|miR-3606-3p|miR-3921|miR-4477b|miR-4653-5p|miR-4796-5p|miR-513a-3p|miR-513c-3p|miR-5186|miR-5583-3p|miR-6504-5p|miR-6746-3p|miR-6799-3p|miR-708-5p|miR-8076		-1.33	-0.08	1.93	-1.25	0.59	0.64	0.64	0.87	3.71	0.1	5.12	2.11	5.2	7.5	6.76582	8.77772	7.44864	6.8482
SLC16A13	solute carrier family 16, member 13	protein coding	ENSG00000174327	201232		GO:0005794	miR-124-3p|miR-1271-5p|miR-4786-5p|miR-506-3p|miR-6825-5p|miR-96-5p		-1.24	0.04	1.2	-1.28	0.55	0.6	0.6	0.81	3.71	0.05	3.24	2.38	3.35	3.53	3.245	4.40839	3.16457	3.20882
LOC100505912	uncharacterized LOC100505912	lncRNA							-1.47	-0.05	2.14	-1.43	0.66	0.71	0.71	0.96	3.71	0.05	5.12	2.2	5.13	3.15	2.36462	4.54809	3.07486	2.4111
ABCA9	ATP-binding cassette, sub-family A (ABC1), member 9	protein coding	ENSG00000154258	10350	02010		miR-105-5p|miR-1185-5p|miR-1277-5p|miR-1304-3p|miR-146a-3p|miR-153-5p|miR-3156-3p|miR-3605-5p|miR-3613-3p|miR-3679-5p|miR-3680-3p|miR-3910|miR-3919|miR-3976|miR-409-5p|miR-4261|miR-4496|miR-4693-5p|miR-4711-3p|miR-4714-5p|miR-5000-5p|miR-5008-3p|miR-503-3p|miR-511-5p|miR-513a-5p|miR-5191|miR-5196-3p|miR-548aa|miR-548ap-3p|miR-548t-3p|miR-5582-5p|miR-5692b|miR-5692c|miR-570-3p|miR-5700|miR-581|miR…		-1.15	-0.23	2.02	-0.92	0.51	0.55	0.55	0.75	3.7	0.41	6.18	1.7	6.62	11.5	10.5604	12.8139	11.6665	10.7897
NXF3	nuclear RNA export factor 3	protein coding	ENSG00000147206	56000	03008|03013|03015|05164|05168	GO:0005515|GO:0005634|GO:0005654|GO:0005737|GO:0006406|GO:0042272	miR-4533|miR-4651|miR-4704-3p|miR-608|miR-6835-5p		1.79	1.04	0.17	0.75	0.8	0.86	0.86	1.18	3.69	1.67	0.16	0.71	3.4	3.28	3.47267	2.59736	4.391	2.43164
SLC2A1	solute carrier family 2 (facilitated glucose transporter), member 1	protein coding	ENSG00000117394	6513	04066|04911|04919|04920|04922|04931|04976|05166|05200|05211|05230	GO:0000139|GO:0005355|GO:0005515|GO:0005886|GO:0005887|GO:0005975|GO:0005989|GO:0006112|GO:0006461|GO:0006766|GO:0006767|GO:0008645|GO:0015758|GO:0016020|GO:0019852|GO:0030496|GO:0030864|GO:0042802|GO:0043621|GO:0044281|GO:0050796|GO:0055085|GO:0070062|GO:0072562|GO:1904659	miR-1238-5p|miR-1263|miR-1273g-5p|miR-1277-5p|miR-1284|miR-140-5p|miR-148a-3p|miR-148b-3p|miR-152-3p|miR-190a-3p|miR-198|miR-302e|miR-3064-5p|miR-3140-5p|miR-328-3p|miR-3591-5p|miR-3663-5p|miR-378a-3p|miR-378b|miR-378c|miR-378d|miR-378e|miR-378f|miR-378h|miR-378i|miR-3925-3p|miR-422a|miR-4254|miR-4262|miR-4269|miR-4293|miR-4296|miR-431-5p|miR-4427|miR-4433a-3p|miR-4433b-3p|miR-4436b-3p|miR-4492|m…		-1.15	0.1	2.44	-1.25	0.52	0.56	0.56	0.76	3.67	0.15	7.24	2.53	7.22	9.08	8.16048	10.5026	9.35128	8.05801
DEFB104B	defensin, beta 104B	protein coding	ENSG00000277006	503618					1.3	-0.78	-0.86	2.09	0.59	0.63	0.63	0.86	3.66	1.74	1.97	4.03	3.3	2.63	2.16783	2.08945	3.39229	2.9514
ENSG00000259238		asRNA	ENSG00000259238						1.34	0.53	-0.03	0.8	0.6	0.65	0.65	0.89	3.65	0.99	0.03	1.14	3.09	2.96	3.00704	2.44799	3.78427	2.47481
PDK1	pyruvate dehydrogenase kinase, isozyme 1	protein coding	ENSG00000152256	5163	04066|05230	GO:0004672|GO:0004740|GO:0005515|GO:0005739|GO:0005759|GO:0006090|GO:0006468|GO:0008283|GO:0008631|GO:0010510|GO:0010906|GO:0044237|GO:0044281|GO:0097411|GO:0098779	let-7c-3p|miR-1245a|miR-1275|miR-1277-5p|miR-128-3p|miR-1285-3p|miR-1295b-3p|miR-130a-3p|miR-130b-3p|miR-136-5p|miR-139-5p|miR-142-5p|miR-148a-3p|miR-148b-3p|miR-152-3p|miR-208a-5p|miR-208b-5p|miR-216a-3p|miR-216a-5p|miR-297|miR-301a-3p|miR-301b-3p|miR-30a-3p|miR-30d-3p|miR-30e-3p|miR-3121-3p|miR-3129-3p|miR-3138|miR-3160-5p|miR-3163|miR-3183|miR-3187-5p|miR-3194-5p|miR-320a|miR-320b|miR-320c|miR…		-1.51	0.22	0.62	-1.73	0.68	0.74	0.74	1.01	3.65	0.26	1.03	2.68	2.75	6.49	6.72212	7.12893	5.61416	6.50566
CITED4	Cbp/p300-interacting transactivator, with Glu/Asp-rich carboxy-terminal domain, 4	protein coding	ENSG00000179862	163732		GO:0003713|GO:0043627	miR-1275|miR-1281|miR-24-3p|miR-3612|miR-4443|miR-4665-5p|miR-4708-3p|miR-650|miR-7973		-1.89	-0.83	0.94	-1.07	0.85	0.92	0.92	1.26	3.64	1.12	1.33	1.04	3.12	9.52	8.91743	10.6842	8.79183	9.74434
Hs.655858		(NA)							-2	-0.15	3.3	-1.85	0.9	0.98	0.98	1.33	3.64	0.12	5.72	2.04	5.85	6.87	5.53379	8.97815	6.97684	5.6814
Hs.651710		(NA)							-1.33	-0.34	1.14	-0.99	0.6	0.65	0.65	0.89	3.63	0.55	2.72	1.51	3.5	2.85	2.3512	3.82855	2.49604	2.69346
AADAC	arylacetamide deacetylase	protein coding	ENSG00000114771	13		GO:0003824|GO:0004806|GO:0005789|GO:0006805|GO:0010898|GO:0016298|GO:0017171|GO:0019213|GO:0044281	miR-106a-5p|miR-106b-5p|miR-1178-3p|miR-142-5p|miR-17-5p|miR-188-3p|miR-203a-3p|miR-20a-5p|miR-20b-5p|miR-300|miR-33b-3p|miR-3668|miR-380-3p|miR-381-3p|miR-4491|miR-4657|miR-515-3p|miR-519d-3p|miR-519e-3p|miR-526b-3p|miR-548l|miR-5590-3p|miR-605-5p|miR-6833-5p|miR-93-5p		2.25	0.39	1.07	1.87	1.03	1.11	1.11	1.51	3.61	0.33	1.25	1.74	4.7	4.04	3.14666	3.83643	6.08879	2.76149
Hs.408455		(NA)							-1.3	0.42	1.39	-1.72	0.59	0.64	0.64	0.87	3.61	0.73	3.58	3.18	3.24	3.74	3.64786	4.62366	3.32388	3.22929
A_22_P00020315		(NA)							-1.33	-0.19	2.05	-1.14	0.61	0.66	0.66	0.89	3.6	0.26	5.3	1.82	5.55	7.16	6.28709	8.51982	7.18883	6.47445
A_33_P3261024		(NA)							-1.33	0.68	1.49	-2.01	0.61	0.66	0.66	0.89	3.6	1.37	3.75	3.72	3.32	2.79	2.8536	3.65886	2.32879	2.17139
A_21_P0013081		(NA)							0.99	0.16	0.09	0.83	0.45	0.49	0.49	0.67	3.59	0.3	0.15	1.75	3.4	3	2.80911	2.7374	3.72685	2.64882
Hs.593666		(NA)							-1.68	0.06	1.73	-1.74	0.77	0.83	0.83	1.13	3.58	0.06	3.39	2.32	3.39	3.41	2.98549	4.64933	2.97196	2.92093
ENSG00000259445		lincRNA	ENSG00000259445						-1.15	0.22	0.85	-1.37	0.53	0.57	0.57	0.78	3.57	0.37	2.23	2.76	2.67	2.71	2.72707	3.35928	2.21034	2.50762
Hs.689442		(NA)							-1.76	-0.09	2.07	-1.67	0.81	0.87	0.87	1.19	3.57	0.08	3.93	2.06	4	3.38	2.68408	4.83612	3.07832	2.77073
TMED8	transmembrane emp24 protein transport domain containing 8	protein coding	ENSG00000100580	283578					-1.21	-0.4	0.93	-0.81	0.56	0.6	0.6	0.82	3.55	0.75	2.31	1.27	3.35	2.52	2.05449	3.38539	2.17191	2.45626
Hs.434406		(NA)							-1.81	0.29	2.02	-2.1	0.84	0.9	0.9	1.23	3.55	0.29	3.68	2.65	3.43	3.39	3.00383	4.73457	2.92475	2.71472
A_33_P3322430		(NA)							-1.19	-0.41	2.1	-0.78	0.55	0.6	0.6	0.81	3.54	0.79	5.95	1.23	6.69	9.65	8.54357	11.0528	9.85997	8.95571
A_22_P00002237		(NA)							1.35	0.01	-0.23	1.33	0.62	0.68	0.68	0.92	3.53	0.01	0.32	2.15	2.86	2.74	2.51118	2.26996	3.61592	2.49999
A_21_P0007083		(NA)							0.92	-0.07	0.22	0.99	0.43	0.46	0.46	0.63	3.53	0.12	0.49	2.39	4.24	2.4	1.97876	2.27294	3.19739	2.04824
BCHE	butyrylcholinesterase	protein coding	ENSG00000114200	590		GO:0003990|GO:0004104|GO:0005576|GO:0042802|GO:0044267|GO:0050783|GO:0072562	miR-1279|miR-1287-3p|miR-1911-3p|miR-203a-3p|miR-3146|miR-3650|miR-4261|miR-4477b|miR-4496|miR-4509|miR-4720-5p|miR-4760-3p|miR-4799-3p|miR-494-3p|miR-5008-3p|miR-5582-3p|miR-5588-5p|miR-5690|miR-5696|miR-625-5p|miR-651-3p|miR-6737-3p|miR-6795-5p|miR-6887-5p|miR-7109-5p|miR-7157-3p|miR-8084		-1.72	-0.3	-0.58	-1.42	0.8	0.86	0.86	1.18	3.52	0.33	0.75	1.67	4.08	5.56	6.10574	5.83306	4.11283	6.40988
A_22_P00010667		(NA)							1.34	-0.34	-1.76	1.68	0.63	0.68	0.68	0.92	3.5	0.52	4.39	2.88	3.88	5.86	6.19334	4.77115	6.11146	6.53483
A_33_P3335624		(NA)							-1.46	-0.21	2.63	-1.25	0.68	0.74	0.74	1	3.5	0.25	6.03	1.75	6.34	7.78	6.61589	9.45341	7.99403	6.82471
A_21_P0010290		(NA)							-1.51	0.29	1.45	-1.8	0.71	0.76	0.76	1.04	3.5	0.36	3.03	2.7	2.95	2.84	2.68056	3.8438	2.3306	2.39218
Hs.744179		(NA)							1.78	-0.28	-1.79	2.06	0.84	0.9	0.9	1.23	3.49	0.28	3.19	2.59	3.06	3.54	3.81131	2.30287	4.08457	4.09242
A_33_P3359408		(NA)							1.08	-0.2	-0.51	1.28	0.51	0.55	0.55	0.75	3.49	0.34	1.19	2.67	2.58	2.36	2.19658	1.88344	2.96424	2.39602
ENSG00000281325		protein coding	ENSG00000281325						-1.42	0.44	2.78	-1.86	0.66	0.72	0.72	0.98	3.49	0.68	6.52	3.04	6.03	4.64	3.85537	6.19481	4.77764	3.41213
105372751		lincRNA	ENSG00000237484	105372751					-1.2	-0.33	2.08	-0.86	0.56	0.61	0.61	0.83	3.48	0.58	5.8	1.38	6.38	10.8	9.76287	12.1715	10.9761	10.0957
Hs.701992		(NA)							-1.37	-0.68	0.95	-0.69	0.64	0.7	0.7	0.95	3.47	1.25	1.97	0.85	3.48	5.45	4.81127	6.43491	5.06862	5.48801
LOC100131564	uncharacterized LOC100131564	lncRNA							-1.4	0.32	1.77	-1.71	0.66	0.71	0.71	0.97	3.47	0.45	4.17	2.77	3.72	4.89	4.55167	6.00592	4.60882	4.23413
MGAT5	mannosyl (alpha-1,6-)-glycoprotein beta-1,6-N-acetyl-glucosaminyltransferase	protein coding	ENSG00000152127	4249	00510|01100	GO:0000139|GO:0018279|GO:0043687|GO:0044267|GO:0070062	miR-1224-3p|miR-1251-3p|miR-1291|miR-155-3p|miR-1825|miR-186-3p|miR-18a-3p|miR-194-3p|miR-204-5p|miR-211-5p|miR-2110|miR-214-5p|miR-302e|miR-3064-5p|miR-3120-3p|miR-3155a|miR-3155b|miR-3173-5p|miR-3202|miR-377-3p|miR-378g|miR-4255|miR-4261|miR-4262|miR-4267|miR-4287|miR-4308|miR-4419a|miR-4435|miR-4436b-3p|miR-4469|miR-4492|miR-4496|miR-4498|miR-4506|miR-4519|miR-4530|miR-4531|miR-4632-5p|miR-464…	E2F4|EZH1|LHX3|LIMD1|NLRP1|PIAS1|RFX3|SOX15|TTC13|ZFP28	-1.12	-0.22	1.74	-0.91	0.53	0.57	0.57	0.78	3.46	0.36	5.17	1.6	5.52	9.53	8.7463	10.7058	9.58199	8.96263
A_33_P3274768		(NA)							1.21	-0.37	-1.13	1.58	0.57	0.62	0.62	0.84	3.45	0.66	2.9	3	2.81	4.3	4.30871	3.55398	4.7596	4.68167
A_21_P0007936		(NA)							-1.65	0.08	1.78	-1.73	0.78	0.84	0.84	1.15	3.44	0.08	3.44	2.26	3.36	4.02	3.57286	5.26789	3.61823	3.48928
MFSD7	major facilitator superfamily domain containing 7	protein coding	ENSG00000169026	84179			miR-1281|miR-3665|miR-764		2.12	-0.24	-1.1	2.36	1.01	1.09	1.09	1.49	3.42	0.18	1.32	2.41	2.43	5.8	5.65037	4.78424	6.90437	5.88603
OR6M1	olfactory receptor, family 6, subfamily M, member 1	protein coding	ENSG00000196099	390261	04740	GO:0005886			1.49	-0.44	-1.57	1.93	0.71	0.77	0.77	1.05	3.42	0.61	3.31	2.92	3.01	3.47	3.58526	2.45327	3.94768	4.02252
PRO2852	uncharacterized protein PRO2852	other ncRNA							-1.45	-0.01	2.73	-1.44	0.69	0.74	0.74	1.01	3.42	0.01	6.18	2.09	6.22	4.02	2.94949	5.68197	4.23398	2.95513
A_22_P00002317		(NA)							-1.73	-0.46	4.69	-1.28	0.83	0.89	0.89	1.22	3.42	0.53	8.37	1.39	9.13	4.62	2.24562	7.39038	5.65552	2.7042
A_33_P3242062		(NA)							1.18	0.75	-0.26	0.43	0.57	0.61	0.61	0.84	3.39	1.72	0.43	0.54	3	3.07	3.45078	2.43335	3.6172	2.69801
LSM11	LSM11, U7 small nuclear RNA associated	protein coding	ENSG00000155858	134353		GO:0005515|GO:0005634|GO:0005654|GO:0005683|GO:0006366|GO:0006369|GO:0006398|GO:0008334|GO:0010467|GO:0031124|GO:0071204|GO:0071209|GO:1900087	miR-101-5p|miR-1294|miR-1297|miR-132-3p|miR-15a-5p|miR-15b-5p|miR-16-5p|miR-1909-3p|miR-195-5p|miR-2110|miR-212-3p|miR-29b-2-5p|miR-3123|miR-3124-3p|miR-3173-5p|miR-320e|miR-3620-3p|miR-3682-5p|miR-424-5p|miR-4267|miR-4271|miR-4325|miR-4330|miR-4457|miR-4458|miR-4499|miR-4500|miR-4524a-5p|miR-4524b-5p|miR-4649-3p|miR-4725-3p|miR-4731-3p|miR-4742-5p|miR-4766-5p|miR-4774-3p|miR-4793-3p|miR-4801|miR…	APTX|DDX51|GTF3C2|MCM4|RAE1|RBM14|RC3H2|RFC5|RNGTT|UTP18|WHSC1|ZNF317	1.4	0.32	-0.12	1.08	0.67	0.72	0.72	0.99	3.38	0.43	0.13	1.47	2.72	3.11	3.02843	2.59702	3.99405	2.71312
EPC2	enhancer of polycomb homolog 2 (Drosophila)	protein coding	ENSG00000135999	26122			miR-106a-3p|miR-1207-3p|miR-1272|miR-1277-5p|miR-1297|miR-130a-3p|miR-130b-3p|miR-1468-3p|miR-17-3p|miR-181a-5p|miR-181b-5p|miR-181c-5p|miR-181d-5p|miR-186-5p|miR-194-5p|miR-19a-3p|miR-19b-3p|miR-203a-3p|miR-21-3p|miR-224-5p|miR-26a-5p|miR-26b-5p|miR-301a-3p|miR-301b-3p|miR-302b-5p|miR-302c-5p|miR-302d-5p|miR-30a-5p|miR-30b-5p|miR-30c-5p|miR-30d-5p|miR-30e-5p|miR-3121-3p|miR-3153|miR-3174|miR-335…		-0.87	-0.28	-0.38	-0.59	0.42	0.45	0.45	0.62	3.38	0.68	1.01	1.23	4.04	6.92	7.14993	7.05131	6.17738	7.42939
PDK2	pyruvate dehydrogenase kinase, isozyme 2	protein coding					miR-3688-3p|miR-4501|miR-450b-5p|miR-4764-3p|miR-570-3p|miR-576-3p		-1.42	-0.2	-0.9	-1.22	0.68	0.74	0.74	1.01	3.38	0.24	1.69	1.69	5	3.99	4.69827	3.99832	2.57565	4.89677
Hs.741792		(NA)							-1.56	-0.12	1.51	-1.45	0.75	0.81	0.81	1.11	3.38	0.11	2.96	1.87	3.18	3.23	2.75341	4.38071	2.81773	2.86866
ENSG00000222032		lincRNA	ENSG00000222032						1.43	0.12	-0.27	1.31	0.69	0.75	0.75	1.02	3.36	0.14	0.35	1.82	2.58	3.57	3.42563	3.03021	4.45827	3.30303
ENSG00000205041		lncRNA	ENSG00000205041						-1.44	0.38	2.14	-1.82	0.7	0.76	0.76	1.03	3.35	0.51	4.79	2.77	4.24	3.9	3.42467	5.18881	3.74381	3.04647
Hs.659681		(NA)							-1.45	1.35	3.32	-2.79	0.7	0.76	0.76	1.03	3.35	2.79	7.25	4.56	6.21	4.16	3.76458	5.7409	4.29544	2.41836
C19orf40	chromosome 19 open reading frame 40	protein coding	ENSG00000131944	91442	03460	GO:0003682|GO:0005515|GO:0005654|GO:0006281|GO:0036297|GO:0043231|GO:0043240	miR-1281|miR-302e|miR-4294|miR-4435|miR-4516|miR-4768-3p|miR-512-3p|miR-520b|miR-520c-3p|miR-6778-3p		1.43	0.13	-1.42	1.3	0.69	0.75	0.75	1.02	3.34	0.14	3.02	1.81	3.24	3.16	3.63049	2.08492	3.51303	3.50145
KLF17	Kruppel-like factor 17	protein coding	ENSG00000171872	128209		GO:0003700|GO:0005515|GO:0006357|GO:0044212	miR-1227-5p|miR-126-5p|miR-129-5p|miR-2467-3p|miR-3180-5p|miR-3194-3p|miR-3195|miR-3667-3p|miR-370-5p|miR-3943|miR-4279|miR-4292|miR-4726-3p|miR-4745-3p|miR-4755-3p|miR-4763-5p|miR-4764-3p|miR-4775|miR-4795-3p|miR-504-3p|miR-6735-5p|miR-6791-5p|miR-6808-5p|miR-6826-3p|miR-6852-3p|miR-6872-3p|miR-6893-5p|miR-7156-3p|miR-940		-1.13	-0.22	2.28	-0.9	0.55	0.59	0.59	0.81	3.33	0.36	6.44	1.51	6.9	10.6	9.52126	12.0213	10.8927	9.74569
VHL	von Hippel-Lindau tumor suppressor, E3 ubiquitin protein ligase	protein coding	ENSG00000134086	7428	04066|04120|05200|05211	GO:0000122|GO:0004842|GO:0005515|GO:0005634|GO:0005654|GO:0005829|GO:0006355|GO:0006508|GO:0008134|GO:0008285|GO:0016567|GO:0019899|GO:0045893|GO:0061418|GO:0061428|GO:0061630|GO:0071456	miR-1252-5p|miR-1281|miR-1285-3p|miR-143-3p|miR-150-5p|miR-155-3p|miR-1827|miR-18a-3p|miR-1976|miR-302e|miR-3065-3p|miR-3135b|miR-3173-3p|miR-320a|miR-320b|miR-320c|miR-320d|miR-33a-3p|miR-340-3p|miR-340-5p|miR-3612|miR-3613-3p|miR-3646|miR-3652|miR-371b-5p|miR-373-5p|miR-3921|miR-3929|miR-4262|miR-4297|miR-4419b|miR-4429|miR-4430|miR-4435|miR-4459|miR-4478|miR-4503|miR-4533|miR-4645-5p|miR-4653-…		-1.22	-0.22	1.41	-1	0.6	0.64	0.64	0.88	3.31	0.32	3.6	1.55	3.92	11.07	10.4755	12.1085	10.8895	10.6947
Hs.662784		(NA)							-1.42	0.17	1.7	-1.59	0.7	0.76	0.76	1.03	3.3	0.19	3.72	2.34	3.45	3.67	3.26993	4.80238	3.37893	3.09986
CARD14	caspase recruitment domain family, member 14	protein coding	ENSG00000141527	79092		GO:0001934|GO:0005737|GO:0033209|GO:0043066|GO:0050700|GO:0051092	miR-1247-3p|miR-3943|miR-4251|miR-4269|miR-4698|miR-520a-5p|miR-525-5p|miR-544b|miR-595|miR-648|miR-6715b-5p|miR-6779-3p|miR-935	DND1|UBTF	-0.98	-0.32	0.21	-0.66	0.48	0.52	0.52	0.71	3.29	0.67	0.39	1.18	2.48	2.66	2.57266	3.10156	2.1196	2.89141
A_33_P3294961		(NA)							-1.28	-0.13	2.35	-1.15	0.63	0.68	0.68	0.93	3.28	0.16	5.8	1.73	6.01	9.35	8.34399	10.8253	9.54044	8.47779
Hs.667735		(NA)							-1.4	-0.41	1.83	-0.99	0.69	0.75	0.75	1.02	3.27	0.58	4.11	1.25	4.66	3.34	2.43689	4.68088	3.28573	2.84672
A_33_P3724750		(NA)							-1.79	-0.57	2.53	-1.21	0.88	0.95	0.95	1.3	3.27	0.66	4.46	1.19	5.08	4.01	2.71502	5.81455	4.02818	3.28838
ENSG00000253927		lincRNA	ENSG00000253927						-1.12	0.45	1.04	-1.57	0.55	0.6	0.6	0.81	3.27	0.89	2.72	3.09	2.63	2.26	2.3365	2.92425	1.80633	1.88453
FAR2	fatty acyl CoA reductase 2	protein coding	ENSG00000064763	55711	04146	GO:0005777|GO:0005782|GO:0008611|GO:0035336|GO:0044255|GO:0044281|GO:0080019	miR-1225-5p|miR-1250-3p|miR-1258|miR-125a-3p|miR-1295b-5p|miR-1304-3p|miR-139-5p|miR-182-5p|miR-188-5p|miR-1912|miR-202-3p|miR-217|miR-218-1-3p|miR-30a-3p|miR-30d-3p|miR-30e-3p|miR-3121-3p|miR-3143|miR-3153|miR-3163|miR-3609|miR-3613-5p|miR-3658|miR-365a-3p|miR-365b-3p|miR-3688-3p|miR-372-5p|miR-3915|miR-3924|miR-3945|miR-4261|miR-4286|miR-4288|miR-4446-5p|miR-4452|miR-4477b|miR-4496|miR-450a-1-3…		1.82	-0.69	-1.88	2.5	0.9	0.97	0.97	1.33	3.26	0.81	3.1	3	2.78	3.86	3.87835	2.68165	4.49853	4.56369
PTK2B	protein tyrosine kinase 2 beta	protein coding	ENSG00000120899	2185	04020|04062|04072|04650|04670|04912|05161	GO:0001954|GO:0002040|GO:0002315|GO:0004683|GO:0004713|GO:0004715|GO:0005515|GO:0005634|GO:0005654|GO:0005737|GO:0005829|GO:0005925|GO:0006461|GO:0006468|GO:0006915|GO:0006950|GO:0006968|GO:0007165|GO:0007166|GO:0007229|GO:0008284|GO:0008285|GO:0008360|GO:0010595|GO:0010758|GO:0010976|GO:0014069|GO:0017146|GO:0018108|GO:0030027|GO:0030155|GO:0030335|GO:0030425|GO:0030426|GO:0030502|GO:0030838|GO:…	let-7c-3p|miR-129-5p|miR-1302|miR-130a-5p|miR-23a-3p|miR-23b-3p|miR-23c|miR-3150a-3p|miR-3153|miR-3175|miR-3184-5p|miR-3202|miR-330-3p|miR-3606-3p|miR-3690|miR-378a-3p|miR-378b|miR-378c|miR-378d|miR-378e|miR-378f|miR-378h|miR-378i|miR-3912-5p|miR-422a|miR-423-5p|miR-4298|miR-4476|miR-450a-2-3p|miR-450b-5p|miR-4514|miR-4643|miR-4651|miR-4670-3p|miR-4688|miR-4692|miR-4708-3p|miR-486-3p|miR-513a-3p|…		-1.13	0.15	1.78	-1.28	0.56	0.6	0.6	0.82	3.26	0.21	5	2.33	4.68	8.36	7.81918	9.45676	8.32749	7.67321
PGM5P2	phosphoglucomutase 5 pseudogene 2	lincRNA	ENSG00000277778	595135					-1.29	-0.49	2.13	-0.8	0.64	0.69	0.69	0.94	3.25	0.81	5.23	1.04	5.99	11.68	10.5259	13.1442	11.856	11.0135
A_24_P162244		(NA)							-1.16	0.36	1.37	-1.53	0.58	0.63	0.63	0.85	3.25	0.63	3.59	2.82	3.11	2.72	2.56489	3.57043	2.40559	2.20119
TMEM138	transmembrane protein 138	protein coding	ENSG00000149483	51524		GO:0005929|GO:0042384	miR-106a-5p|miR-106b-5p|miR-1248|miR-1252-5p|miR-17-5p|miR-20a-5p|miR-20b-5p|miR-320e|miR-4270|miR-4288|miR-4441|miR-4447|miR-4476|miR-4481|miR-4492|miR-4533|miR-4651|miR-4762-3p|miR-4790-3p|miR-4794|miR-501-5p|miR-519d-3p|miR-526b-3p|miR-5580-5p|miR-651-3p|miR-664a-5p|miR-6754-5p|miR-6758-5p|miR-6809-5p|miR-6815-3p|miR-6868-3p|miR-6876-5p|miR-7113-3p|miR-7151-5p|miR-7843-5p|miR-93-5p		1	0.17	-1.02	0.83	0.5	0.54	0.54	0.73	3.24	0.29	3.03	1.54	3.37	7.42	7.82289	6.63674	7.63214	7.6526
A_33_P3287388		(NA)							-1.37	-0.22	1.97	-1.15	0.68	0.74	0.74	1.01	3.23	0.27	4.5	1.55	4.74	7.02	6.16797	8.36402	6.99442	6.38971
CDC42EP3	CDC42 effector protein (Rho GTPase binding) 3	protein coding	ENSG00000163171	10602		GO:0005519|GO:0005829|GO:0007165|GO:0015629	let-7a-3p|let-7b-3p|let-7f-1-3p|miR-1205|miR-1245b-3p|miR-1252-3p|miR-1273d|miR-1277-5p|miR-1283|miR-1287-5p|miR-129-5p|miR-140-3p|miR-141-3p|miR-149-5p|miR-185-5p|miR-186-3p|miR-200a-3p|miR-26b-3p|miR-27a-3p|miR-27b-3p|miR-302f|miR-3120-3p|miR-329-5p|miR-3618|miR-3660|miR-3662|miR-3668|miR-3945|miR-3974|miR-4260|miR-4266|miR-4288|miR-4306|miR-4499|miR-450b-5p|miR-4511|miR-4514|miR-4520-5p|miR-45…		-1.42	0.37	1.53	-1.78	0.71	0.76	0.76	1.04	3.23	0.49	3.22	2.66	2.88	3.2	3.03342	4.19249	2.77662	2.66724
CCL26	chemokine (C-C motif) ligand 26	protein coding	ENSG00000006606	10344	04060|04062	GO:0001938|GO:0006935|GO:0006955|GO:0007267|GO:0030335|GO:0030838|GO:0043547	miR-3614-3p|miR-4279		2.2	0.45	-0.02	1.75	1.1	1.19	1.19	1.62	3.22	0.36	0.01	1.44	2.72	3.57	3.32826	2.86067	5.05918	2.87699
ATP6V0B	ATPase, H+ transporting, lysosomal 21kDa, V0 subunit b	protein coding	ENSG00000117410	533	00190|01100|04142|04145|04721|05110|05120|05152|05323	GO:0005215|GO:0006879|GO:0008286|GO:0010008|GO:0015992|GO:0030670|GO:0033572|GO:0034220|GO:0045454|GO:0055085	miR-1275|miR-3177-3p|miR-3940-5p|miR-3942-5p|miR-4316|miR-4426|miR-4447|miR-4472|miR-4507|miR-4647|miR-4662b|miR-4703-5p|miR-4750-3p|miR-548aa|miR-548ap-3p|miR-548t-3p|miR-634|miR-6736-3p|miR-6804-5p|miR-6836-3p|miR-6840-3p|miR-766-3p|miR-874-5p|miR-95-5p		0.92	0.19	-0.22	0.72	0.46	0.5	0.5	0.68	3.22	0.38	0.44	1.42	2.35	10.26	10.2736	9.85792	10.7767	10.0795
SERTAD4-AS1	SERTAD4 antisense RNA 1	asRNA							-2.2	0.08	3.48	-2.27	1.1	1.19	1.19	1.62	3.22	0.05	4.96	2.06	4.81	3.86	2.64378	6.04533	3.84901	2.56686
BMP8B	bone morphogenetic protein 8b	protein coding	ENSG00000116985	656	04350|04390	GO:0001501	miR-106a-5p|miR-106b-5p|miR-1207-5p|miR-1343-5p|miR-149-5p|miR-17-5p|miR-20a-5p|miR-20b-5p|miR-221-5p|miR-3124-3p|miR-3184-5p|miR-3197|miR-423-5p|miR-4284|miR-4323|miR-4435|miR-4443|miR-4478|miR-4492|miR-4498|miR-4683|miR-4763-3p|miR-5001-5p|miR-515-5p|miR-519a-3p|miR-519b-3p|miR-519c-3p|miR-519d-3p|miR-519e-5p|miR-526b-3p|miR-6165|miR-619-5p|miR-6506-5p|miR-671-5p|miR-6724-5p|miR-6773-5p|miR-677…		-1.04	-0.03	2.05	-1.01	0.52	0.57	0.57	0.77	3.21	0.04	6.13	1.87	6.24	9.94	9.09545	11.1811	10.14	9.12884
Hs.661642		(NA)							-1.74	0.6	2.39	-2.34	0.87	0.94	0.94	1.28	3.21	0.71	4.26	2.88	3.62	3.3	2.92783	4.71791	2.98279	2.32758
MIR100HG	mir-100-let-7a-2 cluster host gene (non-protein coding)	lncRNA							-0.95	-0.84	0.2	-0.12	0.48	0.52	0.52	0.71	3.2	2.47	0.38	0.13	3.33	8.53	8.05846	9.09649	8.14581	8.89401
Hs.636495		(NA)							-1.17	-0.35	2.14	-0.82	0.59	0.63	0.63	0.86	3.2	0.58	5.72	1.2	6.34	10.71	9.62301	12.1171	10.9511	9.97312
ENSG00000228412		lincRNA	ENSG00000228412						-1.27	1.35	1.54	-2.62	0.64	0.69	0.69	0.94	3.2	3.15	3.67	4.71	3.64	3.31	3.82436	4.00836	2.74256	2.47318
SLC2A6	solute carrier family 2 (facilitated glucose transporter), member 6	protein coding	ENSG00000160326	11182		GO:0005886|GO:0055085	miR-1207-5p|miR-1914-5p|miR-3064-5p|miR-4435|miR-4455|miR-4456|miR-4492|miR-4763-3p|miR-486-3p|miR-504-3p|miR-6504-5p|miR-661|miR-6778-3p|miR-6882-3p|miR-7150|miR-92a-2-5p		-1.16	-0.35	1.76	-0.81	0.58	0.63	0.63	0.86	3.19	0.59	4.7	1.2	5.26	8.48	7.59455	9.69903	8.54163	7.94342
A_33_P3241596		(NA)							-1.41	-0.23	2.64	-1.18	0.71	0.77	0.77	1.05	3.19	0.28	5.82	1.52	6.16	10.58	9.37013	12.2491	10.8371	9.60499
IL10RB	interleukin 10 receptor, beta	protein coding	ENSG00000243646	3588	04060|04630|05145|05152|05169	GO:0004872|GO:0005515|GO:0005886|GO:0006954|GO:0006955|GO:0007165|GO:0016021|GO:0019221|GO:0070062	miR-103a-3p|miR-107|miR-149-5p|miR-1827|miR-24-3p|miR-3168|miR-3689a-5p|miR-3689b-5p|miR-3689e|miR-3689f|miR-3927-3p|miR-4294|miR-4456|miR-4485-5p|miR-4534|miR-4649-3p|miR-4650-3p|miR-4671-3p|miR-619-5p|miR-6514-5p|miR-6831-5p|miR-6879-3p		0.93	0.09	-1.01	0.85	0.47	0.51	0.51	0.69	3.18	0.14	3.21	1.7	3.34	7.37	7.72867	6.63079	7.56158	7.64316
A_33_P3503937		(NA)							-1.34	-0.45	3.14	-0.89	0.68	0.74	0.74	1	3.18	0.67	7.09	1.11	7.88	4.8	3.1538	6.75037	5.40674	3.6057
ANKRD36	ankyrin repeat domain 36	protein coding	ENSG00000135976	375248			miR-1200|miR-3064-5p|miR-3180-5p|miR-4283|miR-4324|miR-6504-5p		-1.49	-0.38	2.61	-1.1	0.75	0.81	0.81	1.11	3.18	0.48	5.44	1.29	5.94	6.37	5.09184	8.08524	6.59662	5.47649
A_19_P00315603		(NA)							-1.6	-0.21	3.32	-1.39	0.81	0.88	0.88	1.19	3.18	0.21	6.37	1.61	6.7	6.36	4.86203	8.38692	6.78522	5.07081
CSRP2	cysteine and glycine-rich protein 2	protein coding	ENSG00000175183	1466		GO:0005515|GO:0005925	miR-1236-3p|miR-138-5p|miR-27a-3p|miR-27b-3p|miR-3591-5p|miR-3679-3p|miR-4299|miR-4302|miR-4495|miR-550b-2-5p|miR-6867-5p|miR-6889-3p		-1.2	0.33	1.01	-1.53	0.61	0.65	0.65	0.89	3.18	0.52	2.32	2.67	2.4	9.63	9.65384	10.3295	9.13313	9.32266
TLR1	toll-like receptor 1	protein coding	ENSG00000174125	7096	04620|05152	GO:0002224|GO:0002755|GO:0004872|GO:0005515|GO:0005794|GO:0005886|GO:0005887|GO:0006955|GO:0007165|GO:0034134|GO:0034142|GO:0035354|GO:0035663|GO:0038123|GO:0038124|GO:0042495|GO:0042535|GO:0045087|GO:0045121|GO:0045410|GO:0046982|GO:0071727	miR-1468-3p|miR-4459|miR-452-5p|miR-4676-3p|miR-548aw|miR-551b-5p|miR-8075|miR-892c-3p		1.57	1.02	-0.16	0.55	0.8	0.86	0.86	1.17	3.17	1.64	0.15	0.47	2.76	3.36	3.77674	2.60087	4.16856	2.7572
ENSG00000223883		lincRNA	ENSG00000223883						1.18	0.34	-0.23	0.83	0.6	0.64	0.64	0.88	3.17	0.56	0.33	1.22	2.37	2.44	2.50248	1.93455	3.11036	2.16105
Hs.677194		(NA)							-1.21	-0.29	2.19	-0.91	0.61	0.66	0.66	0.9	3.17	0.44	5.61	1.32	6.09	10.8	9.73252	12.2199	11.0108	10.0275
RARB	retinoic acid receptor, beta	protein coding	ENSG00000077092	5915	05200|05222|05223	GO:0003677|GO:0005515|GO:0005634|GO:0005654|GO:0006367|GO:0007165|GO:0010467|GO:0048566	let-7c-3p|miR-1-3p|miR-124-5p|miR-1277-5p|miR-128-3p|miR-1285-3p|miR-133a-3p|miR-133b|miR-141-3p|miR-144-3p|miR-15a-5p|miR-15b-5p|miR-16-5p|miR-190a-3p|miR-195-5p|miR-200a-3p|miR-2053|miR-206|miR-2110|miR-216a-3p|miR-29a-3p|miR-29a-5p|miR-29b-3p|miR-29c-3p|miR-30a-3p|miR-30d-3p|miR-30e-3p|miR-3125|miR-3182|miR-3187-5p|miR-33a-3p|miR-3613-3p|miR-3652|miR-3681-3p|miR-3682-5p|miR-3916|miR-424-5p|miR…	NLRP1	1.08	-0.07	-0.16	1.16	0.55	0.6	0.6	0.81	3.16	0.1	0.24	2.1	2.64	3.37	3.10794	3.02153	4.10474	3.1816
A_21_P0011003		(NA)							-1.16	0.06	1.09	-1.22	0.59	0.64	0.64	0.87	3.16	0.07	2.65	2.06	2.68	2.44	2.21867	3.24572	2.08521	2.15854
SGSM2	small G protein signaling modulator 2	protein coding	ENSG00000141258	9905		GO:0005096|GO:0005737|GO:0017137|GO:0034499|GO:0043547	miR-105-5p|miR-1200|miR-1207-5p|miR-1229-3p|miR-1258|miR-1266-5p|miR-1296-3p|miR-1343-5p|miR-1913|miR-210-5p|miR-3151-5p|miR-3173-5p|miR-324-3p|miR-34a-5p|miR-34c-5p|miR-3657|miR-3692-5p|miR-3714|miR-3918|miR-4268|miR-4269|miR-4292|miR-4443|miR-4483|miR-4492|miR-449a|miR-449b-5p|miR-4518|miR-4649-3p|miR-4651|miR-4672|miR-4685-5p|miR-4701-5p|miR-4722-5p|miR-485-5p|miR-5582-5p|miR-588|miR-596|miR-6…	SIN3B	-1.41	0.04	2.66	-1.46	0.72	0.78	0.78	1.06	3.16	0.04	5.82	2.01	5.78	7.7	6.68379	9.30421	7.89234	6.63987
SHROOM4	shroom family member 4	protein coding	ENSG00000158352	57477	04530	GO:0005737|GO:0007015|GO:0007420|GO:0009898|GO:0009925|GO:0016324|GO:0050890|GO:0051015	miR-1207-5p|miR-1237-3p|miR-134-3p|miR-204-3p|miR-212-5p|miR-29b-2-5p|miR-3119|miR-3125|miR-3170|miR-3173-3p|miR-3662|miR-3667-3p|miR-367-5p|miR-3671|miR-3916|miR-3928-3p|miR-4251|miR-4291|miR-4297|miR-4328|miR-4441|miR-4451|miR-4453|miR-4463|miR-4492|miR-4505|miR-4538|miR-4640-3p|miR-4660|miR-4694-3p|miR-4736|miR-4747-5p|miR-4763-3p|miR-504-3p|miR-510-5p|miR-5196-5p|miR-548av-3p|miR-5581-5p|miR-…	MBD6	-1.5	0.23	2.39	-1.74	0.77	0.83	0.83	1.13	3.16	0.25	4.9	2.32	4.53	6	5.29902	7.4613	5.95652	5.06698
A_22_P00000522		(NA)							-1.14	-0.05	2.08	-1.09	0.58	0.63	0.63	0.86	3.15	0.06	5.61	1.81	5.68	9.25	8.4093	10.535	9.39457	8.455
Hs.615802		(NA)							-1.37	-0.08	1.17	-1.29	0.7	0.76	0.76	1.03	3.15	0.08	2.32	1.77	2.61	3.73	3.41849	4.66276	3.29131	3.49711
SCFD2	sec1 family domain containing 2	protein coding	ENSG00000184178	152579			miR-3119|miR-3671|miR-3688-3p|miR-4292|miR-4667-3p|miR-4694-3p|miR-556-3p|miR-600|miR-6501-3p|miR-6791-5p|miR-6793-5p|miR-6880-3p|miR-7150|miR-765|miR-7847-3p		1.33	0.48	0.2	0.85	0.68	0.73	0.73	1	3.14	0.74	0.25	1.04	2.91	8.2	8.09171	7.81182	9.14078	7.60974
DNALI1	dynein, axonemal, light intermediate chain 1	protein coding	ENSG00000163879	7802	05016	GO:0003777|GO:0005515|GO:0005737|GO:0005858|GO:0005930|GO:0006928|GO:0007338	let-7a-3p|let-7b-3p|let-7f-1-3p|miR-1205|miR-1238-5p|miR-1273h-3p|miR-1296-3p|miR-183-5p|miR-27a-5p|miR-298|miR-3120-5p|miR-3128|miR-3158-3p|miR-3164|miR-3166|miR-3167|miR-3174|miR-3184-5p|miR-3188|miR-33a-3p|miR-33b-3p|miR-3607-5p|miR-3660|miR-3664-3p|miR-3927-3p|miR-3928-3p|miR-423-5p|miR-4276|miR-4435|miR-4464|miR-4483|miR-4514|miR-4526|miR-4661-5p|miR-4667-5p|miR-4692|miR-4694-3p|miR-4700-5p|…	ARMCX2|CLIP3|DTX3	1.32	-0.69	-1.33	2.02	0.68	0.73	0.73	1	3.14	1.21	2.88	3.28	2.66	3.97	3.82014	3.18054	4.5049	4.51461
A_33_P3349474		(NA)							-1.14	-0.25	2.14	-0.89	0.59	0.63	0.63	0.86	3.14	0.39	5.74	1.36	6.19	11.87	10.8475	13.2412	12.0979	11.1
EFR3B	EFR3 homolog B (S. cerevisiae)	protein coding	ENSG00000084710	22979		GO:0005515|GO:0005886|GO:0046854|GO:0090002	miR-1273h-5p|miR-128-3p|miR-1304-3p|miR-145-3p|miR-151a-5p|miR-151b|miR-1915-3p|miR-211-3p|miR-216a-3p|miR-22-3p|miR-224-5p|miR-2355-5p|miR-2467-5p|miR-25-3p|miR-28-5p|miR-302c-5p|miR-3074-5p|miR-30b-3p|miR-30c-1-3p|miR-30c-2-3p|miR-3125|miR-3139|miR-3143|miR-3155a|miR-3155b|miR-3176|miR-3184-5p|miR-3192-5p|miR-32-5p|miR-3616-3p|miR-3617-5p|miR-363-3p|miR-367-3p|miR-3681-3p|miR-3689a-3p|miR-3689b…		1.82	1.73	3.66	0.09	0.93	1.01	1.01	1.37	3.13	2.68	6.14	0.05	7.87	5.41	4.24194	6.16864	7.98778	2.50839
LOC101929415	uncharacterized LOC101929415	asRNA	ENSG00000254254	101929415					-1	-0.13	0.84	-0.87	0.51	0.55	0.55	0.76	3.13	0.21	2.26	1.57	2.67	2.3	2.02804	2.9964	1.99488	2.16002
Hs.656547		(NA)							-1.07	-0.2	1.87	-0.87	0.55	0.59	0.59	0.81	3.13	0.31	5.35	1.44	5.69	9.19	8.33502	10.4015	9.33228	8.53223
GFPT2	glutamine-fructose-6-phosphate transaminase 2	protein coding	ENSG00000131459	9945	00250|00520|01100|04931	GO:0005515|GO:0005829|GO:0006002|GO:0006048|GO:0006112|GO:0006488|GO:0018279|GO:0043687|GO:0044267	miR-1197|miR-1229-5p|miR-124-3p|miR-1245b-3p|miR-1249-5p|miR-1284|miR-146a-3p|miR-153-3p|miR-1537-5p|miR-2278|miR-2355-3p|miR-25-3p|miR-27a-3p|miR-27a-5p|miR-27b-3p|miR-30a-5p|miR-30b-5p|miR-30c-5p|miR-30d-5p|miR-30e-5p|miR-3121-3p|miR-3151-3p|miR-3184-5p|miR-32-5p|miR-3614-5p|miR-3622a-5p|miR-363-3p|miR-367-3p|miR-3675-3p|miR-378b|miR-3919|miR-423-5p|miR-4279|miR-4283|miR-4428|miR-4436a|miR-449b…		1.76	0.07	-0.9	1.69	0.9	0.98	0.98	1.33	3.12	0.06	1.17	1.79	2.14	11.44	11.5098	10.5316	12.2935	11.4353
ENSG00000279816		protein coding	ENSG00000279816						-1.28	-0.07	2.54	-1.22	0.66	0.71	0.71	0.97	3.12	0.07	6.02	1.77	6.17	10.92	9.85652	12.4616	11.1768	9.92279
ZNF248	zinc finger protein 248	protein coding	ENSG00000198105	57209					-1.31	-0.01	2.34	-1.3	0.67	0.73	0.73	0.99	3.12	0.01	5.45	1.87	5.44	8.87	7.96463	10.3199	9.00847	7.97948
ZNF449	zinc finger protein 449	protein coding	ENSG00000173275	203523		GO:0005515	miR-103a-2-5p|miR-103a-3p|miR-107|miR-1224-5p|miR-1225-3p|miR-1252-3p|miR-128-3p|miR-1322|miR-137|miR-15a-5p|miR-15b-5p|miR-16-5p|miR-1911-3p|miR-195-5p|miR-21-5p|miR-2115-5p|miR-216a-3p|miR-219a-5p|miR-297|miR-335-3p|miR-34b-3p|miR-3606-3p|miR-3662|miR-3671|miR-3678-3p|miR-3681-3p|miR-3692-3p|miR-378a-5p|miR-3923|miR-424-5p|miR-425-5p|miR-4282|miR-4302|miR-4423-3p|miR-4433a-3p|miR-4519|miR-4643|…	ANKRD17|HEATR1|NONO|NSMAF|PBRM1|RPAP3|TMEM118|ZBTB33|ZNF655	-1.36	-0.09	0.72	-1.27	0.7	0.76	0.76	1.03	3.12	0.1	1.21	1.72	2.15	4.35	4.25992	5.07199	3.71222	4.3544
Hs.733864		(NA)							-1.65	0.11	2.45	-1.76	0.85	0.91	0.91	1.25	3.12	0.1	4.51	2.07	4.28	4.2	3.41598	5.75523	4.10617	3.30584
ABCA3	ATP-binding cassette, sub-family A (ABC1), member 3	protein coding	ENSG00000167972	21	02010	GO:0005215|GO:0005615|GO:0005886|GO:0006810|GO:0016020|GO:0042493|GO:0042626|GO:0044267|GO:0055085|GO:0097208|GO:0097232	miR-1255a|miR-1255b-5p|miR-1273h-3p|miR-185-5p|miR-3183|miR-361-3p|miR-376a-3p|miR-376b-3p|miR-4267|miR-4306|miR-432-5p|miR-4483|miR-4644|miR-548az-5p|miR-548t-5p|miR-5587-5p|miR-6758-5p|miR-6829-5p|miR-6856-5p|miR-7151-5p|miR-8062|miR-939-3p		-1.83	0.31	3.88	-2.14	0.94	1.02	1.02	1.39	3.12	0.28	6.42	2.33	6.22	3.87	2.51946	6.08618	4.25657	2.20762
SLC25A20	solute carrier family 25 (carnitine/acylcarnitine translocase), member 20	protein coding	ENSG00000178537	788		GO:0005737|GO:0005739|GO:0005743|GO:0006853|GO:0044255|GO:0044281	miR-1229-3p|miR-1249-5p|miR-129-5p|miR-183-5p|miR-188-5p|miR-3161|miR-338-3p|miR-425-5p|miR-4266|miR-4279|miR-4297|miR-4318|miR-450b-5p|miR-4512|miR-4698|miR-4779|miR-501-5p|miR-548aw|miR-603|miR-6511b-5p|miR-6736-3p|miR-6797-5p|miR-6811-5p|miR-6826-3p|miR-6836-3p|miR-6840-3p|miR-6856-3p|miR-6866-3p|miR-6887-3p|miR-892a		1.54	0.83	-0.4	0.71	0.79	0.86	0.86	1.17	3.11	1.24	0.47	0.67	2.53	5.02	5.42926	4.20356	5.74181	4.60376
IDH3A	isocitrate dehydrogenase 3 (NAD+) alpha	protein coding	ENSG00000166411	3419	00020|01100|01200|01210|01230	GO:0005634|GO:0005739|GO:0005759|GO:0006099|GO:0044237|GO:0044281	miR-1178-5p|miR-1184|miR-1206|miR-1236-5p|miR-1295b-5p|miR-15a-5p|miR-15b-5p|miR-16-5p|miR-1912|miR-195-5p|miR-2053|miR-2113|miR-216a-5p|miR-2467-3p|miR-302a-5p|miR-3065-5p|miR-30a-3p|miR-30d-3p|miR-30e-3p|miR-3136-5p|miR-3150b-3p|miR-3154|miR-3173-3p|miR-3181|miR-3202|miR-3529-5p|miR-3613-3p|miR-3614-5p|miR-3658|miR-3686|miR-379-5p|miR-3978|miR-424-5p|miR-4252|miR-4283|miR-4328|miR-4436b-3p|miR-…	HNRPM|NDUFS1	1.03	0.43	-0.28	0.6	0.53	0.57	0.57	0.78	3.11	0.88	0.49	0.91	2.37	6.87	7.0543	6.34893	7.37865	6.62418
TMCO1	transmembrane and coiled-coil domains 1	protein coding	ENSG00000143183	54499		GO:0005783	miR-1227-5p|miR-1237-3p|miR-1323|miR-153-5p|miR-190a-3p|miR-1976|miR-203b-5p|miR-204-3p|miR-208a-5p|miR-208b-5p|miR-218-5p|miR-3065-5p|miR-3148|miR-3163|miR-3201|miR-3529-3p|miR-3613-3p|miR-3646|miR-3667-3p|miR-3977|miR-411-5p|miR-4261|miR-4267|miR-4282|miR-4306|miR-4311|miR-4428|miR-4436a|miR-4436b-3p|miR-4436b-5p|miR-4499|miR-4535|miR-4632-5p|miR-466|miR-4683|miR-4689|miR-4746-5p|miR-4765|miR-4…		0.9	0.37	-0.44	0.53	0.46	0.5	0.5	0.68	3.11	0.87	1.08	0.92	2.51	9.02	9.2856	8.47697	9.37687	8.91381
LOC729609	uncharacterized LOC729609	lncRNA							-1.07	0.03	1.89	-1.1	0.55	0.6	0.6	0.81	3.11	0.03	5.38	1.95	5.3	8.21	7.50944	9.37363	8.30247	7.48387
SDR42E1	short chain dehydrogenase/reductase family 42E, member 1	protein coding	ENSG00000184860	93517			let-7a-5p|let-7b-5p|let-7c-5p|let-7d-5p|let-7e-5p|let-7f-5p|let-7g-5p|let-7i-5p|miR-124-5p|miR-1273d|miR-148a-5p|miR-153-5p|miR-202-5p|miR-217|miR-3168|miR-335-3p|miR-3617-5p|miR-378j|miR-3927-3p|miR-3977|miR-4257|miR-4267|miR-4293|miR-4311|miR-4458|miR-4500|miR-4650-3p|miR-4651|miR-4671-3p|miR-4687-5p|miR-4694-3p|miR-4717-5p|miR-4762-3p|miR-4782-5p|miR-505-5p|miR-548as-3p|miR-562|miR-5706|miR-60…		-1.02	0.37	0.7	-1.4	0.53	0.57	0.57	0.78	3.11	0.73	1.73	2.83	2.32	3.18	3.34866	3.68043	2.65645	2.97678
Hs.604754		(NA)							-2.18	-0.62	1.9	-1.56	1.12	1.21	1.21	1.65	3.11	0.53	2.37	1.2	3.03	3.62	2.74134	5.25578	3.07748	3.35773
RASSF2	Ras association (RalGDS/AF-6) domain family member 2	protein coding	ENSG00000101265	9770		GO:0004672|GO:0005515|GO:0005634|GO:0005737|GO:0006468|GO:0031954|GO:0033137|GO:0043065|GO:0043234|GO:0045860|GO:0046330|GO:0050821	miR-106a-5p|miR-106b-5p|miR-1227-5p|miR-1254|miR-1273f|miR-1295b-5p|miR-130a-3p|miR-130b-3p|miR-1323|miR-15a-5p|miR-15b-5p|miR-16-5p|miR-17-5p|miR-181a-5p|miR-181b-5p|miR-181c-5p|miR-181d-5p|miR-1827|miR-185-5p|miR-188-3p|miR-1912|miR-193a-5p|miR-195-5p|miR-199a-5p|miR-199b-5p|miR-19a-3p|miR-19b-3p|miR-204-5p|miR-205-3p|miR-20a-5p|miR-20b-5p|miR-211-5p|miR-2113|miR-218-5p|miR-221-5p|miR-2276-3p|m…		2.02	0.82	1.5	1.2	1.04	1.13	1.13	1.54	3.1	0.84	1.91	0.93	4.59	4.02	3.28298	3.96465	5.98665	2.46381
LOC100652911	uncharacterized LOC100652911	other ncRNA							-1.23	-0.33	-0.05	-0.9	0.64	0.69	0.69	0.94	3.1	0.49	0.05	1.24	2.66	3.61	3.72157	4.00182	2.77046	4.05033
A_21_P0010703		(NA)							-1.24	0.02	0.53	-1.25	0.64	0.69	0.69	0.94	3.1	0.02	0.91	1.92	2.13	2.85	2.91065	3.42183	2.18589	2.8933
CYB561	cytochrome b561	protein coding	ENSG00000008283	1534		GO:0000293|GO:0005515	miR-1284|miR-182-5p|miR-185-5p|miR-1915-3p|miR-2467-3p|miR-300|miR-3125|miR-3135b|miR-367-5p|miR-381-3p|miR-3916|miR-4270|miR-4303|miR-4306|miR-4436b-3p|miR-4441|miR-4485-5p|miR-4492|miR-4516|miR-4530|miR-4632-5p|miR-4644|miR-4695-5p|miR-4701-5p|miR-4727-5p|miR-4729|miR-4731-5p|miR-4742-5p|miR-503-5p|miR-5095|miR-5197-3p|miR-532-3p|miR-548g-3p|miR-5585-5p|miR-5696|miR-588|miR-596|miR-6071|miR-608…	STAP2	1.51	0.69	-0.54	0.83	0.78	0.84	0.84	1.15	3.09	0.98	0.71	0.83	2.44	8.41	8.80105	7.57668	9.08718	8.11595
A_33_P3224971		(NA)							-1.05	-0.27	2.04	-0.77	0.54	0.59	0.59	0.8	3.09	0.47	5.9	1.25	6.43	9.76	8.75756	11.0674	10.0218	9.0291
UNC5C	unc-5 homolog C (C. elegans)	protein coding	ENSG00000182168	8633	04360	GO:0007411	let-7a-3p|let-7b-3p|let-7f-1-3p|miR-1224-3p|miR-1224-5p|miR-1236-3p|miR-124-5p|miR-1252-5p|miR-1266-5p|miR-1276|miR-1277-5p|miR-1286|miR-1299|miR-133a-3p|miR-133b|miR-140-3p|miR-141-3p|miR-148a-5p|miR-149-5p|miR-153-3p|miR-155-5p|miR-181a-2-3p|miR-185-5p|miR-186-5p|miR-200a-3p|miR-203a-3p|miR-203b-3p|miR-204-5p|miR-211-5p|miR-214-3p|miR-219b-5p|miR-224-3p|miR-2355-3p|miR-297|miR-301a-5p|miR-301b-…		-1.06	-0.21	0.5	-0.85	0.55	0.55	0.58	0.77	3.09	0.37	1.05	1.49	2.23	4.53	4.43896	5.14759	4.08444	4.64877
A_33_P3271038		(NA)							1.07	-0.75	-1.22	1.82	0.56	0.6	0.6	0.82	3.08	1.74	3.27	3.65	2.89	2.96	2.77715	2.3084	3.38182	3.52387
A_21_P0007658		(NA)							0.88	0.42	-0.05	0.46	0.46	0.49	0.49	0.67	3.08	1.04	0.08	0.78	2.5	2.36	2.45943	1.99067	2.86813	2.04346
CRYBB2P1	crystallin, beta B2 pseudogene 1	pseudogene							-1.13	-0.3	1.92	-0.84	0.59	0.64	0.64	0.87	3.08	0.47	5.13	1.24	5.61	9.38	8.43652	10.6558	9.52245	8.73428
A_33_P3307980		(NA)							-1.69	-0.02	2.3	-1.67	0.88	0.95	0.95	1.3	3.08	0.02	4.03	1.83	3.94	3.71	2.91696	5.24014	3.54692	2.9419
ZNF445	zinc finger protein 445	protein coding	ENSG00000185219	353274		GO:0070062	miR-10a-5p|miR-10b-3p|miR-10b-5p|miR-1227-5p|miR-1247-3p|miR-1275|miR-130b-5p|miR-142-5p|miR-1468-3p|miR-152-3p|miR-153-5p|miR-1909-3p|miR-1972|miR-19a-3p|miR-19b-3p|miR-2115-5p|miR-214-3p|miR-221-5p|miR-26b-3p|miR-296-5p|miR-3064-5p|miR-3128|miR-3143|miR-3613-3p|miR-3619-5p|miR-3620-3p|miR-371b-5p|miR-373-5p|miR-377-3p|miR-4276|miR-4284|miR-4286|miR-4291|miR-4302|miR-4323|miR-4428|miR-4447|miR-4…	CDC5L	-1.12	-0.15	1.17	-0.97	0.58	0.63	0.63	0.86	3.07	0.21	2.94	1.53	3.16	6.42	5.98428	7.30578	6.18516	6.13722
CCL7	chemokine (C-C motif) ligand 7	protein coding	ENSG00000108688	6354	04060|04062	GO:0002548|GO:0005515|GO:0005576|GO:0005623|GO:0006874|GO:0006935|GO:0007010|GO:0007165|GO:0007267|GO:0008009|GO:0008360|GO:0030335|GO:0031726|GO:0048245|GO:2000503	let-7a-5p|let-7b-5p|let-7c-5p|let-7d-5p|let-7e-5p|let-7f-5p|let-7g-5p|let-7i-5p|miR-130a-5p|miR-2115-5p|miR-23a-3p|miR-23b-3p|miR-23c|miR-324-5p|miR-3921|miR-4251|miR-4451|miR-4458|miR-4500|miR-4653-5p|miR-4699-5p|miR-485-3p|miR-513c-5p|miR-514b-5p|miR-539-3p|miR-5580-3p|miR-6798-3p|miR-6831-5p|miR-8083|miR-887-5p|miR-98-5p		2.18	-0.97	-0.19	3.14	1.14	1.23	1.23	1.67	3.06	0.94	0.12	2.99	3.48	3.4	2.20849	2.98705	5.16499	3.17489
ENSG00000237324		asRNA	ENSG00000237324						-1.05	-0.11	0.57	-0.94	0.55	0.59	0.59	0.81	3.06	0.15	1.25	1.61	2.12	2.53	2.42509	3.10606	2.05674	2.53273
TMSB15A	thymosin beta 15a	protein coding	ENSG00000158164	11013			miR-299-5p|miR-4477b|miR-4496|miR-4699-5p|miR-501-3p|miR-502-3p|miR-5680|miR-6750-5p|miR-6839-3p|miR-7113-5p|miR-7855-5p|miR-8060|miR-891b		-2.02	0.21	1.1	-2.22	1.05	1.14	1.14	1.55	3.06	0.15	1.25	2.12	2.09	5.55	5.6568	6.55044	4.533	5.45012
ENSG00000236166		lincRNA	ENSG00000236166						1.42	0.38	-0.34	1.04	0.74	0.8	0.8	1.09	3.05	0.48	0.41	1.22	2.21	4.52	4.60018	3.88279	5.30446	4.22027
LOC171391	uncharacterized LOC171391	lncRNA							-1.24	0.3	0.25	-1.54	0.65	0.7	0.7	0.96	3.05	0.41	0.33	2.45	2.69	5.82	6.23218	6.18559	4.9409	5.93582
Hs.662154		(NA)							1.24	0.76	-0.59	0.48	0.65	0.7	0.7	0.96	3.04	1.45	1.02	0.51	2.85	4.89	5.42874	4.07545	5.3169	4.66583
EMP3	epithelial membrane protein 3	protein coding	ENSG00000142227	2014		GO:0005515|GO:0005886|GO:0008219|GO:0008285|GO:0032060	miR-328-5p|miR-579-5p		1.06	0.05	-0.68	1.02	0.56	0.6	0.6	0.82	3.04	0.06	1.53	1.74	2.14	11.7	11.8151	11.0932	12.1541	11.77
Hs.679533		(NA)							-1.07	-0.12	1.32	-0.94	0.56	0.61	0.61	0.83	3.04	0.17	3.56	1.56	3.68	2.74	2.23117	3.671	2.60163	2.35571
ODF2L	outer dense fiber of sperm tails 2-like	protein coding	ENSG00000122417	57489		GO:0005813	let-7a-2-3p|let-7g-3p|miR-1183|miR-1227-3p|miR-2115-3p|miR-218-1-3p|miR-3064-3p|miR-3074-3p|miR-3130-5p|miR-3150a-3p|miR-331-5p|miR-4275|miR-4312|miR-4328|miR-4424|miR-4480|miR-4482-5p|miR-4524a-5p|miR-4524b-5p|miR-4652-3p|miR-4666a-5p|miR-4782-5p|miR-5008-3p|miR-532-3p|miR-551b-5p|miR-5589-5p|miR-561-3p|miR-5706|miR-576-5p|miR-578|miR-619-5p|miR-647|miR-6506-5p|miR-6737-3p|miR-6740-3p|miR-6763-5…		-1.1	-0.12	2.39	-0.97	0.58	0.62	0.62	0.85	3.04	0.17	6.46	1.57	6.78	12.44	11.3652	13.8795	12.7823	11.4898
ENSG00000231057		asRNA	ENSG00000231057						-1.35	-0.43	0.73	-0.92	0.71	0.76	0.76	1.04	3.04	0.6	1.22	1.1	2.35	3.78	3.43559	4.59201	3.24445	3.86524
VSNL1	visinin-like 1	protein coding	ENSG00000163032	7447		GO:0005515	miR-1273h-3p|miR-1290|miR-1302|miR-130a-5p|miR-130b-5p|miR-143-5p|miR-181b-2-3p|miR-181b-3p|miR-190a-3p|miR-196a-5p|miR-196b-5p|miR-203a-3p|miR-204-5p|miR-21-5p|miR-211-5p|miR-217|miR-23a-3p|miR-23b-3p|miR-23c|miR-3122|miR-3158-5p|miR-3163|miR-3180-5p|miR-3182|miR-323a-3p|miR-3672|miR-374b-3p|miR-376a-2-5p|miR-376a-3p|miR-376b-3p|miR-382-5p|miR-3910|miR-3913-5p|miR-3924|miR-4278|miR-4282|miR-4289…		-1.66	-0.09	1.32	-1.57	0.87	0.94	0.94	1.29	3.04	0.08	2.05	1.7	2.38	3.94	3.61239	5.02784	3.36542	3.70698
PCDH17	protocadherin 17	protein coding	ENSG00000118946	27253		GO:0005515	let-7f-2-3p|miR-1183|miR-1185-1-3p|miR-1185-2-3p|miR-1200|miR-124-3p|miR-1245a|miR-1250-3p|miR-127-5p|miR-1271-5p|miR-1286|miR-129-5p|miR-1295b-5p|miR-1304-3p|miR-130a-5p|miR-1323|miR-146a-3p|miR-150-3p|miR-153-5p|miR-15a-5p|miR-15b-5p|miR-16-5p|miR-182-3p|miR-190a-3p|miR-1910-3p|miR-1912|miR-193b-5p|miR-195-5p|miR-196b-3p|miR-19a-5p|miR-19b-1-5p|miR-19b-2-5p|miR-200c-5p|miR-205-3p|miR-2053|miR-2…	AKT3	1.45	0.1	-0.15	1.35	0.76	0.82	0.82	1.12	3.03	0.09	0.15	1.68	2.45	2.74	2.50048	2.25678	3.7058	2.40328
A_21_P0001254		(NA)							1.13	0.05	-0.86	1.07	0.59	0.64	0.64	0.87	3.03	0.07	1.93	1.72	2.3	4.82	5.01663	4.10409	5.23168	4.96247
TMEM5	transmembrane protein 5	protein coding	ENSG00000118600	10329		GO:0005794|GO:0005887|GO:0035269	miR-136-5p|miR-148a-3p|miR-148b-3p|miR-152-3p|miR-197-3p|miR-302f|miR-3133|miR-4698|miR-4700-3p|miR-4729|miR-4789-5p|miR-548c-3p|miR-548l|miR-5689|miR-5701|miR-6736-3p		1.07	0.33	-1.13	0.74	0.57	0.61	0.61	0.83	3.02	0.57	2.95	1.1	3.54	7.78	8.34609	6.87958	7.94916	8.01387
TMEM33	transmembrane protein 33	protein coding	ENSG00000109133	55161		GO:0005515|GO:0005635|GO:0005783|GO:0042470|GO:0070062	let-7a-3p|let-7b-3p|let-7f-1-3p|miR-100-3p|miR-103a-3p|miR-107|miR-1178-5p|miR-1185-5p|miR-1228-3p|miR-1233-3p|miR-1245b-3p|miR-1246|miR-1252-5p|miR-126-5p|miR-1276|miR-1277-5p|miR-1283|miR-1297|miR-1301-5p|miR-137|miR-139-5p|miR-143-3p|miR-153-5p|miR-1587|miR-15a-5p|miR-15b-5p|miR-16-1-3p|miR-16-5p|miR-181a-5p|miR-181b-5p|miR-181c-5p|miR-181d-5p|miR-195-5p|miR-205-3p|miR-2115-3p|miR-214-3p|miR-2…	CENTB2|CIRBP|NUP50|RERE|ROD1|ZBTB20	1.16	0.32	-1.53	0.84	0.61	0.66	0.66	0.9	3.01	0.49	3.83	1.18	4.28	4.05	4.78867	2.93925	4.09786	4.47014
INADL	InaD-like (Drosophila)	protein coding	ENSG00000132849	10207	04390|04530	GO:0005515|GO:0005886|GO:0005923|GO:0034329|GO:0045216|GO:0048471|GO:0070062|GO:0070830	miR-103a-3p|miR-107|miR-1250-3p|miR-1255a|miR-1255b-5p|miR-1301-3p|miR-1305|miR-1323|miR-141-3p|miR-143-3p|miR-143-5p|miR-144-5p|miR-18a-5p|miR-18b-5p|miR-200a-3p|miR-200a-5p|miR-200b-5p|miR-204-3p|miR-223-5p|miR-3074-5p|miR-3136-3p|miR-3143|miR-3157-5p|miR-3162-5p|miR-3168|miR-3183|miR-335-3p|miR-33a-3p|miR-340-3p|miR-3616-3p|miR-3672|miR-3686|miR-370-3p|miR-371b-5p|miR-373-5p|miR-377-5p|miR-392…	ANK3|CLIP1|NBEAL1|PPP1R13B	-1	-0.17	1.31	-0.83	0.53	0.57	0.57	0.78	3.01	0.27	3.78	1.41	4	5.58	5.01888	6.4993	5.49854	5.19092
AMZ1	archaelysin family metallopeptidase 1	protein coding	ENSG00000174945	155185			miR-1229-3p|miR-1252-5p|miR-17-3p|miR-18a-3p|miR-1972|miR-298|miR-4297|miR-4311|miR-4481|miR-4483|miR-4497|miR-4722-3p|miR-4726-3p|miR-4747-5p|miR-4757-5p|miR-5196-5p|miR-520g-3p|miR-520h|miR-548aj-5p|miR-548f-5p|miR-548g-5p|miR-548x-5p|miR-6089|miR-660-3p|miR-663b|miR-6727-3p|miR-6744-3p|miR-6887-3p		-1.18	-0.22	2.2	-0.97	0.63	0.68	0.68	0.92	3.01	0.29	5.5	1.39	5.84	10.16	9.14448	11.5568	10.3724	9.35996
A_33_P3382105		(NA)							-1.34	-0.33	2.1	-1.01	0.71	0.77	0.77	1.04	3.01	0.43	4.63	1.24	5.05	9.36	8.34708	10.7816	9.44177	8.68186
A_23_P216038		(NA)							-1.6	-0.35	2.89	-1.25	0.85	0.92	0.92	1.25	3.01	0.37	5.36	1.31	5.77	4.85	3.47422	6.71775	5.11555	3.82555
Hs.138411		(NA)							-1.61	-0.21	3.19	-1.4	0.85	0.92	0.92	1.26	3.01	0.2	5.85	1.5	6.13	4.46	3.03595	6.44	4.82511	3.25078
A_33_P3341722		(NA)							-1.23	0.39	2.54	-1.62	0.65	0.7	0.7	0.95	3.01	0.6	6.13	2.63	5.67	6.88	6.14229	8.28792	7.0629	5.74833
LINC01529	lincRNA 1529	lincRNA	ENSG00000225872	644050					1.34	-0.4	-1.48	1.74	0.71	0.77	0.77	1.04	3	0.55	3.09	2.57	2.68	4.46	4.59464	3.5214	4.85782	4.99917
L2HGDH	L-2-hydroxyglutarate dehydrogenase	protein coding	ENSG00000087299	79944	00650	GO:0005739|GO:0005743|GO:0006103|GO:0016021|GO:0044237|GO:0044267|GO:0044281|GO:0047545	miR-1227-3p|miR-124-3p|miR-1250-3p|miR-1257|miR-126-5p|miR-1304-5p|miR-140-3p|miR-153-5p|miR-155-3p|miR-16-1-3p|miR-186-5p|miR-190a-3p|miR-192-5p|miR-196a-3p|miR-21-3p|miR-215-5p|miR-299-5p|miR-3074-3p|miR-3130-5p|miR-3158-3p|miR-3168|miR-3182|miR-3190-5p|miR-335-3p|miR-338-5p|miR-33a-3p|miR-3591-3p|miR-3674|miR-3680-3p|miR-3685|miR-371b-5p|miR-373-5p|miR-3924|miR-3927-5p|miR-3973|miR-4277|miR-43…	BOP1|CENPA|CKAP5|COPS3|CREBZF|DARS2|DDX19A|KARS|MCM4|MRPS12|MRPS17|NOLC1|POLR3K|RPA1|WDR18|WDR5|WHSC1	-0.95	-0.3	1.94	-0.64	0.5	0.54	0.54	0.74	3	0.6	6.04	1.08	6.71	12.27	11.2645	13.5056	12.5594	11.5681
TNIP1	TNFAIP3 interacting protein 1	protein coding	ENSG00000145901	10318		GO:0002755|GO:0005515|GO:0005622|GO:0005654|GO:0005737|GO:0006412|GO:0006952|GO:0007159|GO:0009101|GO:0043124|GO:0045071|GO:0045944|GO:0050729|GO:0051019|GO:0070373|GO:0085032	miR-1207-3p|miR-149-5p|miR-1914-3p|miR-2276-3p|miR-2467-5p|miR-3194-3p|miR-4268|miR-4443|miR-4635|miR-4778-3p|miR-5004-3p|miR-505-5p|miR-516b-5p|miR-517a-3p|miR-517b-3p|miR-517c-3p|miR-5194|miR-548p|miR-5580-5p|miR-615-5p|miR-6510-5p|miR-6721-5p|miR-6732-5p|miR-6738-5p|miR-676-5p|miR-6880-5p|miR-6882-3p|miR-7113-5p|miR-760|miR-7977|miR-7978|miR-8057		-1.01	-0.36	0.53	-0.65	0.53	0.58	0.58	0.79	3	0.69	1.16	1	2.36	8.73	8.45144	9.34271	8.33495	8.81069
POMK	protein-O-mannose kinase	protein coding	ENSG00000185900	84197		GO:0006493|GO:0007420|GO:0016773|GO:0046835	miR-1273h-5p|miR-451b|miR-4742-5p|miR-6501-3p		1.27	-0.2	-0.32	1.47	0.67	0.73	0.73	0.99	3	0.25	0.44	2.21	2.39	3	2.68419	2.56341	3.83088	2.88658
GSG1	germ cell associated 1	protein coding	ENSG00000111305	83445		GO:0005515	miR-103b|miR-1224-3p|miR-1252-5p|miR-1260a|miR-1260b|miR-141-3p|miR-148a-5p|miR-200a-3p|miR-3130-5p|miR-3168|miR-34a-3p|miR-371a-3p|miR-3915|miR-4291|miR-4469|miR-4482-5p|miR-4524a-5p|miR-4524b-5p|miR-4534|miR-455-5p|miR-4656|miR-4713-3p|miR-4769-5p|miR-5008-3p|miR-5187-5p|miR-6131|miR-647|miR-6499-3p|miR-6737-3p|miR-6757-5p|miR-6819-3p|miR-6841-5p|miR-6877-3p|miR-7153-3p|miR-7157-3p|miR-7515|miR…		-1.11	-0.33	2.26	-0.78	0.59	0.64	0.64	0.87	3	0.53	6	1.14	6.62	10.27	9.11969	11.7058	10.5939	9.44666
FTX	FTX transcript, XIST regulator (non-protein coding)	lincRNA	ENSG00000230590	100302692					-1.24	-0.48	1.12	-0.76	0.66	0.71	0.71	0.97	3	0.76	2.4	0.94	3.24	3.08	2.4606	4.06442	2.82347	2.94113
Hs.446240		(NA)							-1.85	-0.41	1.88	-1.43	0.98	1.06	1.06	1.45	2.99	0.37	2.77	1.28	3.18	4.2	3.38678	5.68116	3.83339	3.80026
ZNF503-AS2	ZNF503 antisense RNA 2	asRNA							-1.57	0.16	-0.47	-1.73	0.84	0.9	0.9	1.23	2.99	0.14	0.53	2.05	3.79	4.35	5.13689	4.51559	2.94128	4.98133
A_33_P3338961		(NA)							-1.06	-0.33	1.75	-0.73	0.56	0.61	0.61	0.83	2.98	0.57	4.84	1.09	5.41	7.58	6.68619	8.76363	7.70475	7.01655
LOC100129940	uncharacterized LOC100129940	asRNA	ENSG00000197301	100129940					-1.56	0.01	2.37	-1.57	0.83	0.9	0.9	1.23	2.98	0.01	4.43	1.82	4.3	3.8	2.96001	5.32109	3.75695	2.95108
FAM224B	family with sequence similarity 224, member B (non-protein coding)	lincRNA	ENSG00000230663						-1.09	-0.21	2.22	-0.88	0.58	0.63	0.63	0.86	2.97	0.32	5.95	1.34	6.37	9.27	8.22631	10.6571	9.5659	8.43988
A_33_P3305117		(NA)							-1.23	-0.25	2.38	-0.98	0.66	0.71	0.71	0.97	2.97	0.33	5.66	1.32	6.07	9.08	7.9504	10.5865	9.35313	8.20228
A_22_P00018073		(NA)							-1.4	-0.02	0.92	-1.38	0.75	0.81	0.81	1.1	2.97	0.02	1.55	1.75	2.08	3.34	3.20205	4.14649	2.74701	3.22637
Hs.581653		(NA)							-1.43	-0.12	2.86	-1.31	0.77	0.83	0.83	1.13	2.97	0.12	5.85	1.6	6.05	6.62	5.38744	8.36748	6.93488	5.51027
DNHD1	dynein heavy chain domain 1	protein coding	ENSG00000179532	144132		GO:0070062			1.1	-0.96	-1.5	2.07	0.59	0.64	0.64	0.87	2.96	2.27	3.92	3.95	3.25	3.07	2.86887	2.3282	3.42985	3.83269
LINC01233	lincRNA 1233	lincRNA	ENSG00000269364	100128139					1.19	0.16	-0.83	1.04	0.64	0.69	0.69	0.94	2.96	0.2	1.67	1.48	2.23	3.44	3.6795	2.69198	3.88587	3.52152
A_21_P0012899		(NA)							-1.46	-0.7	2.27	-0.76	0.78	0.84	0.84	1.15	2.96	1	4.54	0.74	5.47	4.53	3.20069	6.16814	4.71253	3.8966
RASSF4	Ras association (RalGDS/AF-6) domain family member 4	protein coding	ENSG00000107551	83937		GO:0005515	miR-1273g-3p|miR-1285-3p|miR-134-3p|miR-153-3p|miR-1825|miR-185-3p|miR-2110|miR-3136-5p|miR-3151-5p|miR-3158-5p|miR-3187-5p|miR-326|miR-330-5p|miR-3663-3p|miR-367-5p|miR-3678-3p|miR-3919|miR-3934-3p|miR-4252|miR-4436b-3p|miR-4439|miR-4443|miR-4487|miR-4492|miR-4498|miR-4502|miR-4534|miR-4632-5p|miR-4640-5p|miR-4652-5p|miR-4660|miR-4667-5p|miR-4690-5p|miR-4700-5p|miR-4722-5p|miR-4726-5p|miR-4731-5…		-1.71	-0.58	-0.91	-1.13	0.92	0.99	0.99	1.35	2.96	0.63	1.16	1.03	3.8	4.52	5.0428	4.70765	2.99603	5.61953
LINC00937	long intergenic non-protein coding RNA 937	lincRNA	ENSG00000226091	389634					-0.97	-0.04	1.82	-0.93	0.52	0.57	0.57	0.77	2.95	0.06	5.47	1.68	5.55	10.58	9.83909	11.7063	10.7335	9.88174
Hs.568913		(NA)							-1.07	-0.24	2.08	-0.83	0.58	0.62	0.62	0.85	2.95	0.36	5.68	1.27	6.12	10.49	9.48723	11.8048	10.7369	9.72396
LOC100128398	uncharacterized LOC100128398	other ncRNA	ENSG00000176593	100128398					-1.31	-0.12	1.17	-1.19	0.71	0.77	0.77	1.04	2.93	0.13	2.29	1.55	2.53	3.99	3.62623	4.91793	3.60706	3.74989
Hs.673671		(NA)							-1.31	-0.61	1.42	-0.7	0.71	0.77	0.77	1.04	2.93	0.95	2.95	0.76	3.88	3.52	2.66901	4.6995	3.38873	3.27676
LRRC8B	leucine rich repeat containing 8 family, member B	protein coding	ENSG00000197147	23507		GO:0005515|GO:0005737|GO:0005886|GO:0098656	let-7a-3p|let-7b-3p|let-7f-1-3p|miR-1205|miR-1227-3p|miR-1249-5p|miR-125a-3p|miR-125a-5p|miR-125b-5p|miR-1275|miR-1279|miR-1303|miR-1323|miR-138-2-3p|miR-141-3p|miR-143-3p|miR-19a-3p|miR-19b-3p|miR-200a-3p|miR-200a-5p|miR-200b-5p|miR-216b-3p|miR-2681-5p|miR-27a-3p|miR-27b-3p|miR-3123|miR-3180-5p|miR-3611|miR-3616-5p|miR-3617-5p|miR-3646|miR-3662|miR-3678-3p|miR-3680-3p|miR-3688-5p|miR-374b-3p|miR…		1.72	0.21	-2.05	1.51	0.93	1.01	1.01	1.38	2.92	0.18	3.29	1.48	3.41	5.22	6.01191	3.74518	5.47002	5.79976
Hs.509499		(NA)							-1.25	-0.05	2.74	-1.2	0.68	0.74	0.74	1	2.91	0.05	6.28	1.66	6.46	7.69	6.52944	9.31907	8.06832	6.58048
A_22_P00007350		(NA)							-1.33	0.05	1	-1.38	0.72	0.78	0.78	1.06	2.91	0.05	1.83	1.84	2.11	2.73	2.58478	3.54144	2.21415	2.53657
Hs.681796		(NA)							-2.01	0.27	1.68	-2.28	1.1	1.18	1.18	1.61	2.91	0.2	2.09	2.08	2.16	4.34	4.1751	5.58601	3.57315	3.90395
TRAPPC11	trafficking protein particle complex 11	protein coding	ENSG00000168538	60684			miR-1275|miR-1305|miR-146a-3p|miR-2681-5p|miR-3121-3p|miR-3145-3p|miR-3925-5p|miR-3942-3p|miR-4311|miR-4326|miR-499a-3p|miR-499b-3p|miR-5003-3p|miR-5096|miR-548av-3p|miR-6780a-3p|miR-7-1-3p|miR-7-2-3p|miR-8078|miR-944		0.97	0.8	-0.21	0.17	0.53	0.57	0.57	0.78	2.9	2.05	0.35	0.18	2.86	5.36	5.79994	4.78525	5.75545	4.99685
ZNF763	zinc finger protein 763	protein coding	ENSG00000197054	284390		GO:0070062	miR-1263|miR-1827|miR-188-3p|miR-1972|miR-199a-5p|miR-199b-5p|miR-200a-5p|miR-200b-5p|miR-200c-5p|miR-203a-3p|miR-3151-5p|miR-3925-3p|miR-4302|miR-4316|miR-433-3p|miR-4500|miR-4729|miR-4768-5p|miR-550a-3p|miR-630|miR-6833-3p|miR-7153-3p|miR-7154-5p	AIPL1|ASB10|BACH1|DISC1|FBXL18|FOXN4|KLHL22|KRT7|NOBOX|PAX8|PHLDB1|RNF38|RUNX2|TRIM10|VAC14|ZNF219|ZNF491|ZNF551|ZNF804B	-1.09	-0.21	1.97	-0.88	0.59	0.64	0.64	0.87	2.9	0.3	5.21	1.31	5.55	8.57	7.65313	9.83492	8.74504	7.86365
Hs.584269		(NA)							-0.82	0.42	0.8	-1.24	0.45	0.48	0.48	0.66	2.9	1.08	2.56	3	2.38	2.28	2.38337	2.76666	1.94499	1.96204
LOC101929374	uncharacterized LOC101929374	lincRNA	ENSG00000234928	101929374					-1.82	-0.79	1.11	-1.04	0.99	1.07	1.07	1.46	2.9	0.86	1.36	0.81	2.52	3.18	2.49439	4.39234	2.56774	3.28389
SORT1	sortilin 1	protein coding	ENSG00000134243	6272	04142|04722	GO:0005515|GO:0005769|GO:0005794|GO:0005886|GO:0005905|GO:0006895|GO:0006897|GO:0007186|GO:0007218|GO:0008333|GO:0008625|GO:0009986|GO:0010465|GO:0010468|GO:0014902|GO:0016021|GO:0016023|GO:0016050|GO:0019899|GO:0030136|GO:0030379|GO:0032509|GO:0032868|GO:0038180|GO:0046323|GO:0048011|GO:0048227|GO:0048406|GO:0048471|GO:0051005	let-7f-2-3p|miR-1185-1-3p|miR-1185-2-3p|miR-1199-5p|miR-122-5p|miR-1226-5p|miR-1233-3p|miR-1253|miR-1271-5p|miR-1284|miR-1287-3p|miR-1296-3p|miR-138-5p|miR-1468-3p|miR-146a-3p|miR-146a-5p|miR-146b-3p|miR-146b-5p|miR-149-3p|miR-155-5p|miR-1827|miR-185-5p|miR-186-5p|miR-190a-3p|miR-1913|miR-1915-3p|miR-216b-5p|miR-2276-3p|miR-2909|miR-3064-5p|miR-3074-5p|miR-30a-3p|miR-30c-1-3p|miR-30c-2-3p|miR-30d…		-1.91	0.32	-0.01	-2.23	1.04	1.12	1.12	1.53	2.9	0.26	0.01	2.16	2.93	5.14	5.88766	5.55479	3.64477	5.56519
COQ6	coenzyme Q6 monooxygenase	protein coding	ENSG00000119723	51004	00130|01100	GO:0005739|GO:0006744|GO:0044281	miR-3156-5p|miR-4677-5p|miR-6721-5p|miR-939-3p		0.78	0.02	-0.59	0.76	0.43	0.46	0.46	0.63	2.88	0.03	1.83	1.68	2.13	6.04	6.15709	5.54529	6.32577	6.13976
A_33_P3256500		(NA)							-1.38	0.14	2.01	-1.52	0.76	0.82	0.82	1.11	2.88	0.15	4.11	1.99	3.79	3.86	3.25586	5.1243	3.74339	3.11243
WNT8A	wingless-type MMTV integration site family, member 8A	protein coding	ENSG00000061492	7478	04310|04340|04390|04550|04916|05166|05200|05205|05217	GO:0005576|GO:0005578|GO:0014034|GO:0044324|GO:0044335|GO:0060021|GO:0060070|GO:0090263	miR-15a-5p|miR-15b-5p|miR-16-5p|miR-195-5p|miR-346|miR-424-5p|miR-4258|miR-4269|miR-4286|miR-4426|miR-493-3p|miR-497-5p|miR-5095|miR-642a-5p|miR-6509-3p|miR-6715b-5p|miR-6838-5p|miR-6873-3p|miR-7-1-3p|miR-7-2-3p|miR-7151-3p|miR-7977		0.89	-0.1	-0.28	0.99	0.49	0.53	0.53	0.72	2.88	0.15	0.55	2	2.12	2.26	2.10242	1.9226	2.81239	2.1979
FAM20A	family with sequence similarity 20, member A	protein coding	ENSG00000108950	54757		GO:0001934|GO:0005515|GO:0005623|GO:0005783|GO:0031214|GO:0043539|GO:0044691|GO:0055074|GO:0070062|GO:0070166|GO:0071902	miR-1200|miR-1257|miR-1273g-5p|miR-1295b-3p|miR-1343-3p|miR-1825|miR-1912|miR-296-5p|miR-3064-5p|miR-3136-3p|miR-3160-5p|miR-3182|miR-3674|miR-3675-3p|miR-3921|miR-3944-5p|miR-4266|miR-4270|miR-4306|miR-4324|miR-4441|miR-4447|miR-4500|miR-450a-1-3p|miR-4652-3p|miR-4653-5p|miR-4659a-3p|miR-4659b-3p|miR-4762-3p|miR-4790-3p|miR-5089-5p|miR-548n|miR-6515-3p|miR-6754-5p|miR-6756-5p|miR-6762-3p|miR-676…		3.06	0.12	-6.05	2.94	1.68	1.82	1.82	2.48	2.87	0.05	5.64	1.64	5.73	6.35	8.84545	2.67365	5.73694	8.72469
CLDN14	claudin 14	protein coding	ENSG00000159261	23562	04514|04530|04670|05160	GO:0005783|GO:0005886|GO:0005923|GO:0006461|GO:0016338|GO:0034329|GO:0042802|GO:0045216|GO:0070830	miR-1277-5p|miR-190a-3p|miR-30a-3p|miR-30d-3p|miR-30e-3p|miR-335-3p|miR-374a-5p|miR-374b-5p|miR-4279|miR-4691-3p|miR-5011-5p|miR-9-5p		1.85	-0.16	2.57	2.01	1.02	1.1	1.1	1.5	2.87	0.12	3.88	1.93	7.05	4.41	2.43401	5.16	7.00741	2.59169
RHEBL1	Ras homolog enriched in brain like 1	protein coding	ENSG00000167550	121268		GO:0005515|GO:0005525|GO:0005737|GO:0031929|GO:0051092			1.12	-0.07	-0.49	1.18	0.61	0.66	0.66	0.9	2.87	0.08	0.86	1.87	1.94	4.93	4.84364	4.42035	5.53747	4.90977
ASCL1	achaete-scute family bHLH transcription factor 1	protein coding	ENSG00000139352	429		GO:0000122|GO:0000978|GO:0000989|GO:0001078|GO:0003358|GO:0003359|GO:0003677|GO:0003700|GO:0005515|GO:0005634|GO:0007219|GO:0010468|GO:0022008|GO:0043066|GO:0043425|GO:0045665|GO:0045666|GO:0045892|GO:0045944|GO:0060579|GO:0061549|GO:0070888	let-7c-3p|miR-1179|miR-1229-3p|miR-1258|miR-2054|miR-2115-5p|miR-224-3p|miR-2467-3p|miR-2682-5p|miR-2861|miR-3150b-3p|miR-34b-5p|miR-3605-3p|miR-3678-3p|miR-3689d|miR-374a-5p|miR-374b-5p|miR-4251|miR-4257|miR-4446-3p|miR-4447|miR-4456|miR-449c-5p|miR-4659a-3p|miR-4659b-3p|miR-466|miR-4666a-5p|miR-4695-3p|miR-4768-5p|miR-4784|miR-4789-5p|miR-497-3p|miR-504-3p|miR-522-3p|miR-548aa|miR-548an|miR-548…		0.88	-0.07	0.16	0.96	0.49	0.52	0.52	0.71	2.87	0.11	0.28	1.93	3.24	2.49	2.11242	2.34716	3.2285	2.18691
LOC729732	uncharacterized LOC729732	lncRNA							-1.03	-0.25	-0.04	-0.78	0.57	0.61	0.61	0.84	2.87	0.4	0.05	1.19	2.43	3.31	3.4243	3.63384	2.60059	3.67681
CKMT2	creatine kinase, mitochondrial 2 (sarcomeric)	protein coding	ENSG00000131730	1160	00330|01100	GO:0005739|GO:0005743|GO:0006595|GO:0006600|GO:0006936|GO:0034641|GO:0044281	miR-1324|miR-3166|miR-4428|miR-4477a|miR-4477b|miR-4530|miR-5192|miR-548ae-3p|miR-548ah-3p|miR-548aj-3p|miR-548am-3p|miR-548aq-3p|miR-548j-3p|miR-548x-3p|miR-634|miR-6808-5p|miR-6893-5p|miR-922|miR-940	INTS8	-1.18	-0.18	1.1	-1	0.65	0.7	0.7	0.96	2.87	0.23	2.38	1.38	2.67	3.21	2.79729	4.08549	2.90052	2.98215
ENSG00000257322		asRNA	ENSG00000257322						-1.19	-0.03	1.06	-1.16	0.66	0.71	0.71	0.96	2.87	0.03	2.23	1.67	2.36	2.49	2.22129	3.30952	2.11804	2.25055
A_21_P0005152		(NA)							-1.22	-0.45	-0.78	-0.77	0.67	0.72	0.72	0.98	2.87	0.69	1.43	0.93	3.97	4.07	4.47701	4.15172	2.935	4.92695
CEP68	centrosomal protein 68kDa	protein coding	ENSG00000011523	23177		GO:0005515|GO:0005634|GO:0005737|GO:0005813|GO:0005815|GO:0010457|GO:0019901|GO:0019904|GO:0030054|GO:0033365|GO:0051297	miR-100-3p|miR-1224-3p|miR-1248|miR-1250-3p|miR-1260a|miR-1260b|miR-1264|miR-1273h-3p|miR-1277-5p|miR-1297|miR-1299|miR-144-3p|miR-150-3p|miR-150-5p|miR-152-5p|miR-153-5p|miR-155-5p|miR-200b-3p|miR-200c-3p|miR-205-3p|miR-20a-3p|miR-214-5p|miR-224-5p|miR-26a-5p|miR-26b-5p|miR-29a-3p|miR-29b-3p|miR-29c-3p|miR-3117-3p|miR-3148|miR-3162-3p|miR-3166|miR-3184-3p|miR-3190-5p|miR-323a-3p|miR-329-5p|miR-3…	ARID1B|RCOR3|ZNF302|ZNF493	-1.65	0.08	1.77	-1.73	0.91	0.98	0.98	1.34	2.87	0.07	2.84	1.85	2.7	3.52	3.07956	4.76759	3.11634	2.99601
EPS15	epidermal growth factor receptor pathway substrate 15	protein coding	ENSG00000085832	2060	04144	GO:0005515|GO:0005737|GO:0005829|GO:0005886|GO:0005905|GO:0006895|GO:0007173|GO:0008283|GO:0016020|GO:0016050|GO:0016235|GO:0019065|GO:0031593|GO:0032456|GO:0042059|GO:0043231|GO:0046718|GO:0048268	miR-1178-3p|miR-1258|miR-1277-5p|miR-1285-3p|miR-1297|miR-130a-3p|miR-130b-3p|miR-140-5p|miR-145-5p|miR-1468-3p|miR-146a-3p|miR-148a-3p|miR-148b-3p|miR-152-3p|miR-19a-3p|miR-19b-3p|miR-26b-3p|miR-29a-5p|miR-301a-3p|miR-301b-3p|miR-3125|miR-3174|miR-3187-5p|miR-3188|miR-3614-3p|miR-3646|miR-3662|miR-3666|miR-3670|miR-3686|miR-3714|miR-371a-5p|miR-3916|miR-3927-3p|miR-4276|miR-4294|miR-4295|miR-431…	FOXN3|LNPEP|MBNL1|MTMR3|SMARCA2|TRIM33|ZNF407|ZNF493	-1.21	0.09	2.7	-1.3	0.67	0.72	0.72	0.98	2.86	0.1	6.31	1.91	6.31	6.55	5.50034	8.10732	6.89793	5.40716
HENMT1	HEN1 methyltransferase homolog 1 (Arabidopsis)	protein coding	ENSG00000162639	113802		GO:0001510|GO:0005515|GO:0008171|GO:0008173|GO:0010467|GO:0031047|GO:0034587|GO:0043186	miR-323a-3p|miR-3613-3p|miR-4725-5p|miR-504-5p|miR-526b-5p|miR-548ae-3p|miR-548ah-3p|miR-548aj-3p|miR-548am-3p|miR-548aq-3p|miR-548j-3p|miR-548x-3p|miR-570-3p|miR-6507-3p		1.1	0.42	-1.88	0.69	0.61	0.66	0.66	0.9	2.85	0.7	4.81	0.9	5.51	6.22	7.23337	4.93984	6.04377	6.81583
KRTCAP2	keratinocyte associated protein 2	protein coding	ENSG00000163463	200185					0.8	0.01	-1.08	0.79	0.44	0.48	0.48	0.65	2.85	0.02	3.74	1.69	3.62	11.34	11.7055	10.6178	11.4144	11.6946
Hs.675332		(NA)							-1	-0.41	1.76	-0.59	0.55	0.6	0.6	0.81	2.85	0.79	5.01	0.83	5.8	7.1	6.12077	8.29882	7.29974	6.53439
Hs.658840		(NA)							-1.44	0.6	0.99	-2.04	0.8	0.86	0.86	1.17	2.85	0.8	1.58	2.72	2.13	3.26	3.55738	3.94907	2.50859	2.95621
ZNF599	zinc finger protein 599	protein coding	ENSG00000153896	148103		GO:0005515	miR-1273f|miR-141-3p|miR-186-5p|miR-200a-3p|miR-2467-5p|miR-3125|miR-3134|miR-3190-5p|miR-340-5p|miR-378a-5p|miR-3916|miR-3926|miR-4258|miR-4284|miR-4469|miR-495-3p|miR-5591-3p|miR-5688|miR-6507-5p|miR-6744-5p|miR-6755-5p|miR-6776-3p|miR-6859-5p|miR-8485|miR-888-5p		1.08	0.72	-0.36	0.35	0.6	0.64	0.64	0.88	2.84	1.53	0.6	0.39	2.57	2.78	3.21229	2.12558	3.20311	2.48738
SLFN5	schlafen family member 5	protein coding	ENSG00000166750	162394			miR-1237-3p|miR-1245a|miR-1255b-2-3p|miR-126-5p|miR-1275|miR-1279|miR-133a-5p|miR-135a-5p|miR-135b-5p|miR-142-5p|miR-18a-3p|miR-18b-3p|miR-2116-5p|miR-218-5p|miR-22-3p|miR-2355-5p|miR-2681-5p|miR-27a-3p|miR-27b-3p|miR-298|miR-29b-2-5p|miR-3164|miR-3174|miR-335-3p|miR-3606-3p|miR-3677-5p|miR-379-3p|miR-3908|miR-411-3p|miR-4284|miR-4291|miR-4426|miR-4490|miR-4501|miR-4647|miR-4662b|miR-4666a-5p|miR…		-0.96	-0.48	1.27	-0.48	0.53	0.58	0.58	0.78	2.84	1.01	3.63	0.68	4.58	10.66	9.88564	11.6352	10.6732	10.3641
GJD4	gap junction protein, delta 4, 40.1kDa	protein coding	ENSG00000177291	219770			miR-1304-3p|miR-371a-5p|miR-4419a|miR-4532|miR-635|miR-6774-5p|miR-6778-3p|miR-6784-5p|miR-6809-5p	MBD6|MYCN|MYST3|POLL|PTBP1|PWWP2B|REXO1|SARDH|SCT|TTC28|ZNF192|ZNF286A|ZNF423	-0.99	-0.18	1.9	-0.81	0.55	0.59	0.59	0.81	2.84	0.28	5.44	1.31	5.79	8.66	7.77945	9.86342	8.87263	7.95993
METTL21A	methyltransferase like 21A	protein coding	ENSG00000144401	151194		GO:0005515|GO:0006479|GO:0016279|GO:0018022|GO:0030544|GO:0051117	let-7f-2-3p|miR-1-3p|miR-1207-5p|miR-1279|miR-1321|miR-138-1-3p|miR-149-3p|miR-190a-3p|miR-206|miR-218-5p|miR-323b-3p|miR-329-5p|miR-33a-5p|miR-33b-5p|miR-3617-5p|miR-4251|miR-4294|miR-4314|miR-4319|miR-4435|miR-4461|miR-4494|miR-4497|miR-4632-3p|miR-4646-5p|miR-4694-3p|miR-4739|miR-4756-5p|miR-4763-3p|miR-5001-3p|miR-5002-5p|miR-500a-5p|miR-501-5p|miR-5011-5p|miR-5095|miR-5096|miR-548av-3p|miR-6…		-1.34	-0.59	2.96	-0.75	0.74	0.8	0.8	1.09	2.84	0.86	6.23	0.78	7.14	8.44	6.79111	10.3369	9.00026	7.38186
TFRC	transferrin receptor	protein coding	ENSG00000072274	7037	04066|04144|04145|04640	GO:0001948|GO:0003725|GO:0004998|GO:0005515|GO:0005576|GO:0005615|GO:0005768|GO:0005886|GO:0005887|GO:0005905|GO:0006879|GO:0009897|GO:0009986|GO:0016023|GO:0016323|GO:0033572|GO:0035690|GO:0042802|GO:0042803|GO:0043231|GO:0044822|GO:0048471|GO:0055037|GO:0055085|GO:0070062|GO:0072562|GO:0097286|GO:1903561|GO:1990712	miR-10a-5p|miR-10b-5p|miR-1183|miR-1208|miR-1250-3p|miR-1275|miR-1279|miR-130b-5p|miR-140-5p|miR-1468-3p|miR-146b-3p|miR-153-5p|miR-181a-5p|miR-181b-2-3p|miR-181b-3p|miR-181b-5p|miR-181c-5p|miR-181d-5p|miR-21-3p|miR-215-3p|miR-302c-5p|miR-31-5p|miR-335-3p|miR-3591-3p|miR-3606-3p|miR-3606-5p|miR-3607-3p|miR-3662|miR-3664-5p|miR-3926|miR-3974|miR-4261|miR-4262|miR-4266|miR-4275|miR-4282|miR-4311|mi…	DDX3X|DHX9|G3BP2|GABPA|GLS|GTF2I|PPP2R1B|RB1|RNGTT|SFRS2|STIP1|WDR36|ZNF207	-1.4	-1.13	1.52	-0.27	0.78	0.84	0.84	1.14	2.84	1.94	2.86	0.21	4.66	9.46	8.19808	10.8485	9.44956	9.32651
A_21_P0010719		(NA)							-1.4	-0.32	1.22	-1.08	0.78	0.84	0.84	1.15	2.84	0.37	2.14	1.2	2.61	2.91	2.39828	3.9411	2.53641	2.72025
LINC00504	lincRNA 504	asRNA	ENSG00000269821	10984					-1.1	-0.18	2.4	-0.92	0.61	0.66	0.66	0.9	2.83	0.24	6.11	1.33	6.5	10.64	9.52409	12.1045	11.0021	9.70635
LINC00504	lincRNA 504	pseudogene	ENSG00000215146	441666					-1.15	-0.22	2.51	-0.93	0.64	0.69	0.69	0.94	2.83	0.29	6.14	1.28	6.57	10.59	9.40193	12.1267	10.978	9.62056
C18orf63	chromosome 18 open reading frame 63	protein coding	ENSG00000206043	644041			let-7a-3p|let-7b-3p|let-7f-1-3p|miR-1-3p|miR-105-5p|miR-106a-3p|miR-1277-5p|miR-1285-5p|miR-1299|miR-1323|miR-1468-3p|miR-182-3p|miR-2054|miR-206|miR-217|miR-224-3p|miR-29b-2-5p|miR-31-3p|miR-3115|miR-3117-5p|miR-3143|miR-3158-5p|miR-3163|miR-33a-3p|miR-3529-3p|miR-3609|miR-3680-3p|miR-3688-5p|miR-3690|miR-3691-5p|miR-374a-5p|miR-374b-5p|miR-380-3p|miR-384|miR-3928-3p|miR-4291|miR-4317|miR-4428|m…		-1.03	-0.38	0.62	-0.65	0.57	0.62	0.62	0.84	2.82	0.67	1.3	0.91	2.31	2.52	2.18308	3.18175	2.15373	2.56212
FRMD1	FERM domain containing 1	protein coding	ENSG00000153303	79981	04390		miR-133a-3p|miR-133b|miR-3202|miR-3678-3p|miR-4283|miR-4300|miR-4319|miR-4483|miR-4487|miR-4722-5p|miR-5591-5p|miR-6726-5p|miR-6784-5p|miR-6805-5p|miR-920	FBXL18	-1.27	-0.45	-0.26	-0.82	0.71	0.77	0.77	1.04	2.82	0.64	0.32	0.93	2.67	3.18	3.32272	3.51649	2.24488	3.77619
LMNTD2	lamin tail domain containing 2	protein coding	ENSG00000275873	256329			miR-4717-5p|miR-7108-3p		-1.7	-0.4	0.64	-1.29	0.95	1.02	1.02	1.39	2.82	0.38	0.69	1.18	1.93	3.53	3.3445	4.38494	2.68963	3.74485
QRSL1	glutaminyl-tRNA synthase (glutamine-hydrolyzing)-like 1	protein coding	ENSG00000130348	55278	00970|01100	GO:0005739|GO:0030956|GO:0032543|GO:0050567|GO:0070681	miR-126-5p|miR-1273g-3p|miR-197-3p|miR-28-3p|miR-298|miR-302a-3p|miR-302b-3p|miR-302c-3p|miR-302d-3p|miR-302e|miR-3125|miR-3173-3p|miR-338-5p|miR-3662|miR-3670|miR-372-3p|miR-373-3p|miR-383-3p|miR-3916|miR-4258|miR-4259|miR-4260|miR-4303|miR-4319|miR-4329|miR-4473|miR-4660|miR-4672|miR-4707-3p|miR-4709-3p|miR-4768-5p|miR-4775|miR-4795-3p|miR-489-3p|miR-5011-5p|miR-513a-5p|miR-517-5p|miR-520a-3p|m…	MRPL44|POLE3|PSMD7|YBX1	-0.93	0.42	1.13	-1.35	0.52	0.56	0.56	0.76	2.81	0.89	3.26	2.78	2.66	2.92	2.87753	3.5852	2.6563	2.45259
ENSG00000255248		lncRNA	ENSG00000255248						-1.72	-0.17	3.12	-1.54	0.96	1.04	1.04	1.41	2.81	0.14	5.1	1.46	5.25	4.69	3.36031	6.65535	4.93939	3.53416
Hs.519666		(NA)							-2.42	-0.92	2.79	-1.5	1.35	1.46	1.46	1.99	2.81	0.7	3.04	0.88	3.72	4.73	3.21146	6.92415	4.50055	4.13517
LAPTM5	lysosomal protein transmembrane 5	protein coding	ENSG00000162511	7805	04142	GO:0005515|GO:0005764	miR-1207-5p|miR-1272|miR-1587|miR-183-3p|miR-190a-3p|miR-203b-3p|miR-302f|miR-3127-5p|miR-3136-5p|miR-3620-5p|miR-4254|miR-4291|miR-4306|miR-4439|miR-4441|miR-4443|miR-4446-3p|miR-4459|miR-452-5p|miR-4633-3p|miR-4656|miR-4676-3p|miR-4680-3p|miR-4690-5p|miR-4691-3p|miR-4722-3p|miR-4731-3p|miR-4763-3p|miR-4792|miR-4801|miR-549a|miR-579-3p|miR-580-5p|miR-589-3p|miR-630|miR-6500-5p|miR-6501-3p|miR-66…	APBB1IP|ARHGAP25|BIN2|CORO1A|IKZF1|IRF8|KLHL6|LCP2|LGALS9|LYL1|PLEK|SAMSN1|TOX4|TRPV2	1.7	-0.31	-0.27	2.01	0.95	1.03	1.03	1.41	2.8	0.27	0.23	2.1	2.42	3.02	2.48662	2.52595	4.22607	2.79315
Hs.191518		(NA)							-1.15	-0.3	1.77	-0.86	0.65	0.7	0.7	0.95	2.8	0.42	4.23	1.13	4.63	9.52	8.66354	10.7256	9.57265	8.96019
A_23_P210131		(NA)							-1.23	-0.34	2.41	-0.89	0.69	0.75	0.75	1.02	2.8	0.46	5.47	1.09	6	5.96	4.75496	7.50402	6.27084	5.09619
A_33_P3228677		(NA)							-0.91	0.27	0.8	-1.18	0.51	0.55	0.55	0.75	2.8	0.51	2.15	2.39	2.08	2.27	2.28491	2.81261	1.90233	2.01235
Hs.133107		(NA)							-1.78	-0.24	2.99	-1.54	1	1.08	1.08	1.47	2.8	0.19	4.68	1.39	4.85	5.3	4.00279	7.22796	5.44882	4.23915
RENBP	renin binding protein	protein coding	ENSG00000102032	5973	00520	GO:0004866|GO:0008217|GO:0019262|GO:0050121|GO:0070062			1.01	0.4	0.38	0.61	0.57	0.62	0.62	0.84	2.79	0.73	0.67	0.84	3.04	3.95	3.77779	3.75249	4.76618	3.37449
SPCS3	signal peptidase complex subunit 3 homolog (S. cerevisiae)	protein coding	ENSG00000129128	60559	03060	GO:0005783|GO:0005789|GO:0006412|GO:0006614|GO:0010467|GO:0044267|GO:0050796	miR-1250-3p|miR-1252-3p|miR-1273g-3p|miR-129-1-3p|miR-129-2-3p|miR-1297|miR-1303|miR-141-3p|miR-186-5p|miR-202-3p|miR-203a-3p|miR-204-5p|miR-2052|miR-211-5p|miR-224-5p|miR-3119|miR-3123|miR-3125|miR-3163|miR-3191-5p|miR-340-3p|miR-340-5p|miR-3605-5p|miR-3606-5p|miR-3613-3p|miR-3646|miR-3662|miR-3671|miR-3684|miR-378g|miR-3916|miR-4271|miR-4282|miR-4297|miR-4303|miR-4434|miR-449c-3p|miR-4516|miR-4…		0.98	0.1	-0.36	0.88	0.55	0.59	0.59	0.81	2.79	0.14	0.65	1.45	1.86	10.28	10.2801	9.82195	10.7999	10.1782
ILDR1	immunoglobulin-like domain containing receptor 1	protein coding	ENSG00000145103	286676			miR-1207-3p|miR-124-3p|miR-1276|miR-3145-3p|miR-3652|miR-4430|miR-4492|miR-4498|miR-4659a-3p|miR-4659a-5p|miR-4659b-3p|miR-4659b-5p|miR-4713-3p|miR-4715-3p|miR-4756-3p|miR-5001-5p|miR-506-3p|miR-510-5p|miR-548a-3p|miR-548ar-3p|miR-548az-3p|miR-548e-3p|miR-548f-3p|miR-552-3p|miR-5582-5p|miR-5683|miR-6768-5p|miR-6778-3p|miR-6839-3p|miR-6882-5p|miR-762|miR-892a		-1.2	-0.19	2.21	-1.01	0.68	0.73	0.73	1	2.79	0.23	5.13	1.33	5.39	12.45	11.4505	13.8511	12.6471	11.6398
Hs.679824		(NA)							-1.23	-0.19	2.38	-1.03	0.69	0.75	0.75	1.02	2.79	0.23	5.41	1.33	5.7	3.96	2.88039	5.45415	4.22627	3.07518
A_33_P3609431		(NA)							-1.02	-0.01	1.73	-1.02	0.58	0.62	0.62	0.85	2.78	0.01	4.68	1.66	4.59	9.5	8.84942	10.5819	9.55808	8.85486
LOC101928389	uncharacterized LOC101928389	lncRNA	ENSG00000235834						-1.02	0.09	0.52	-1.11	0.57	0.62	0.62	0.84	2.78	0.12	1.02	1.89	1.84	3.06	3.12259	3.54517	2.52698	3.02871
MYADM	myeloid-associated differentiation marker	protein coding	ENSG00000179820	91663		GO:0001726|GO:0001933|GO:0005886|GO:0005911|GO:0010629|GO:0030335|GO:0030837|GO:0030864|GO:0031579|GO:0034115|GO:0045121|GO:0061028|GO:0070062|GO:0072661|GO:0090038|GO:1900026	miR-1227-5p|miR-124-3p|miR-1252-5p|miR-1275|miR-1277-5p|miR-1295b-5p|miR-140-3p|miR-150-5p|miR-190a-3p|miR-1910-3p|miR-1912|miR-2682-5p|miR-3065-3p|miR-3125|miR-3133|miR-3134|miR-3145-3p|miR-3163|miR-3202|miR-34a-5p|miR-34c-5p|miR-3612|miR-3914|miR-3916|miR-3919|miR-4259|miR-4271|miR-4296|miR-4306|miR-4311|miR-4443|miR-449a|miR-449b-5p|miR-4514|miR-451b|miR-4533|miR-4665-5p|miR-4692|miR-4725-3p|m…		0.93	-0.3	1.1	1.23	0.53	0.57	0.57	0.78	2.78	0.55	3.09	2.41	6.7	11.51	10.4542	11.8524	12.787	10.7528
A_21_P0006195		(NA)							1.21	0.02	-0.29	1.19	0.68	0.74	0.74	1.01	2.77	0.02	0.37	1.63	2	2.59	2.43187	2.1244	3.33302	2.41078
MXI1	MAX interactor 1, dimerization protein	protein coding	ENSG00000119950	4601		GO:0003714|GO:0005515|GO:0005634|GO:0005730|GO:0005737|GO:0008285|GO:0042994	miR-1252-3p|miR-125b-2-3p|miR-1294|miR-1297|miR-1298-5p|miR-1305|miR-133a-5p|miR-138-1-3p|miR-144-5p|miR-1913|miR-1915-3p|miR-1915-5p|miR-194-3p|miR-208a-5p|miR-208b-5p|miR-2113|miR-217|miR-24-3p|miR-26a-5p|miR-26b-5p|miR-302e|miR-3074-3p|miR-3136-3p|miR-3143|miR-3169|miR-3173-5p|miR-3202|miR-320a|miR-320b|miR-320c|miR-320d|miR-320e|miR-323a-3p|miR-324-3p|miR-335-3p|miR-34a-3p|miR-3606-3p|miR-361…	ANAPC5|NAPA|POLR2E|PSPC1|RBM22|STIP1	-1.43	-0.53	-0.36	-0.91	0.81	0.88	0.88	1.2	2.77	0.65	0.4	0.89	2.72	5.78	5.96407	6.13192	4.69783	6.49032
A_19_P00322228		(NA)							-1.55	-0.12	1.42	-1.43	0.88	0.95	0.95	1.29	2.77	0.11	2.22	1.49	2.38	3.93	3.49882	5.03938	3.48554	3.6237
PANDAR	promoter of CDKN1A antisense DNA damage activated RNA	lincRNA	ENSG00000281450	101154753					1.22	1	0.36	0.22	0.69	0.75	0.75	1.02	2.76	1.93	0.5	0.18	2.86	3.21	3.42499	2.78991	4.00991	2.42525
LOC101927229	uncharacterized LOC101927229	lincRNA	ENSG00000267013	101927229					1.05	0.8	0.07	0.25	0.6	0.64	0.64	0.88	2.76	1.75	0.09	0.26	2.55	2.54	2.80546	2.07788	3.1306	2.00346
GPATCH2	G patch domain containing 2	protein coding	ENSG00000092978	55105		GO:0010923	miR-106a-5p|miR-106b-5p|miR-1302|miR-1304-5p|miR-17-5p|miR-20a-5p|miR-20b-5p|miR-2467-3p|miR-29a-3p|miR-29b-3p|miR-29c-3p|miR-3144-3p|miR-330-3p|miR-3607-3p|miR-3672|miR-3977|miR-4261|miR-4298|miR-4455|miR-4456|miR-4738-3p|miR-4765|miR-4768-5p|miR-514a-3p|miR-514b-3p|miR-519d-3p|miR-526b-3p|miR-5584-5p|miR-561-5p|miR-5682|miR-6508-5p|miR-6731-3p|miR-6757-5p|miR-6830-5p|miR-6833-3p|miR-6864-3p|miR…	DDX55|RPAP3	0.95	0.26	-0.67	0.69	0.54	0.58	0.58	0.79	2.76	0.45	1.56	1.07	2.25	5.43	5.7275	4.79736	5.7502	5.46515
FAM161A	family with sequence similarity 161, member A	protein coding	ENSG00000170264	84140		GO:0005515|GO:0005813|GO:0032391|GO:0036064|GO:0042384	miR-1183|miR-148a-3p|miR-148b-3p|miR-152-3p|miR-15a-5p|miR-15b-5p|miR-16-5p|miR-182-5p|miR-195-5p|miR-19a-3p|miR-19b-3p|miR-210-5p|miR-3173-5p|miR-338-5p|miR-369-3p|miR-374a-5p|miR-374b-5p|miR-374c-5p|miR-3919|miR-424-5p|miR-4261|miR-4422|miR-4495|miR-4519|miR-4531|miR-4534|miR-4672|miR-4684-3p|miR-4761-3p|miR-497-5p|miR-5095|miR-548a-3p|miR-548ar-3p|miR-548aw|miR-548az-3p|miR-548e-3p|miR-548f-3p…		0.86	0.59	-0.17	0.27	0.49	0.53	0.53	0.72	2.76	1.52	0.29	0.36	2.4	5.54	5.83447	5.07303	5.93644	5.24253
Hs.741930		(NA)							1.51	0.44	-0.05	1.07	0.86	0.93	0.93	1.27	2.75	0.48	0.04	1.04	2.16	3.89	3.83214	3.34614	4.86099	3.39224
Hs.517180		(NA)							-1.08	0.07	2.07	-1.15	0.62	0.66	0.66	0.91	2.75	0.09	5.27	1.8	5.14	8.68	7.91773	9.91097	8.83065	7.84525
A_21_P0011258		(NA)							-1.23	-0.23	0.69	-1	0.7	0.76	0.76	1.03	2.75	0.28	1.15	1.25	1.92	2.73	2.5166	3.44068	2.20969	2.74824
TMEM132B	transmembrane protein 132B	protein coding	ENSG00000139364	114795			let-7a-3p|let-7b-3p|let-7f-1-3p|miR-10a-5p|miR-10b-5p|miR-1207-5p|miR-1248|miR-1250-3p|miR-125a-3p|miR-1260a|miR-1260b|miR-1298-3p|miR-1299|miR-1302|miR-134-3p|miR-137|miR-141-5p|miR-153-5p|miR-186-3p|miR-1911-3p|miR-1915-3p|miR-1972|miR-19a-3p|miR-19b-3p|miR-204-3p|miR-218-5p|miR-2355-5p|miR-299-3p|miR-302e|miR-3064-5p|miR-3065-5p|miR-3121-3p|miR-3148|miR-3156-3p|miR-3157-5p|miR-3175|miR-3180-5p…		-1.46	-0.66	1.51	-0.8	0.83	0.9	0.9	1.22	2.75	0.85	2.61	0.74	3.45	4.09	3.18767	5.35755	3.8984	3.84414
KIAA1217	KIAA1217	protein coding	ENSG00000120549	56243		GO:0005515|GO:0005737|GO:0048706	let-7a-3p|let-7b-3p|let-7c-3p|let-7f-1-3p|miR-1238-5p|miR-1244|miR-1252-5p|miR-129-1-3p|miR-129-2-3p|miR-1299|miR-130a-3p|miR-130b-3p|miR-148a-3p|miR-148b-3p|miR-148b-5p|miR-152-3p|miR-154-3p|miR-182-5p|miR-19a-3p|miR-19a-5p|miR-19b-1-5p|miR-19b-2-5p|miR-19b-3p|miR-301a-3p|miR-301b-3p|miR-3120-3p|miR-3121-3p|miR-3148|miR-3156-5p|miR-331-5p|miR-33a-3p|miR-34a-5p|miR-34c-5p|miR-3613-3p|miR-3666|miR…	MKL2|RBPMS|TFDP1	1.52	-0.08	0.8	1.6	0.87	0.94	0.94	1.28	2.74	0.06	1.04	1.76	4.09	3.93	3.04295	3.91565	5.43663	3.11958
Hs.659247		(NA)							0.99	0.25	0.19	0.74	0.57	0.61	0.61	0.83	2.74	0.4	0.28	1.11	2.63	2.69	2.50365	2.44307	3.43612	2.25357
A_33_P3385561		(NA)							-1.01	-0.26	1.67	-0.74	0.58	0.62	0.62	0.85	2.74	0.42	4.54	1.09	4.96	10.02	9.20115	11.1387	10.1312	9.46432
EP400NL	EP400 N-terminal like	other ncRNA							-1.17	-0.09	0.41	-1.08	0.67	0.72	0.72	0.99	2.74	0.1	0.6	1.48	1.83	2.71	2.73973	3.23507	2.06313	2.8269
SPEG	SPEG complex locus	protein coding	ENSG00000072195	10290		GO:0005515|GO:0007517|GO:0008285	miR-125a-5p|miR-125b-5p|miR-132-5p|miR-1324|miR-149-3p|miR-149-5p|miR-3667-3p|miR-3692-5p|miR-4279|miR-4319|miR-4436a|miR-4505|miR-4517|miR-4640-5p|miR-4726-5p|miR-4728-5p|miR-5000-3p|miR-5787|miR-6785-5p|miR-6867-3p|miR-6883-5p|miR-7111-3p|miR-7113-3p|miR-766-3p|miR-95-5p	INVS	-1.8	-0.54	2.07	-1.26	1.03	1.11	1.11	1.51	2.74	0.5	2.95	1.02	3.42	5.82	4.79917	7.40697	5.60241	5.33927
A_22_P00011868		(NA)							0.94	0.09	-0.14	0.85	0.54	0.58	0.58	0.79	2.73	0.13	0.21	1.44	2.04	2.49	2.37592	2.14556	3.08861	2.28621
OSTCP1	oligosaccharyltransferase complex subunit pseudogene 1	pseudogene	ENSG00000243775	202459					0.84	0	-1.21	0.83	0.48	0.52	0.52	0.7	2.73	0	3.9	1.64	3.74	7.75	8.17594	6.96543	7.80063	8.17566
ANP32A-IT1	ANP32A intronic transcript 1 (non-protein coding)	lncRNA							-0.94	-0.07	1.94	-0.87	0.54	0.58	0.58	0.79	2.73	0.1	5.64	1.48	5.82	10.23	9.39184	11.3979	10.4578	9.46254
Hs.679519		(NA)							-0.99	-0.08	1.85	-0.91	0.57	0.61	0.61	0.83	2.73	0.1	5.13	1.47	5.24	12.12	11.342	13.2675	12.2809	11.4196
SLC9A3R1	solute carrier family 9, subfamily A (NHE3, cation proton antiporter 3), member 3 regulator 1	protein coding	ENSG00000109062	9368		GO:0005102|GO:0005515|GO:0005737|GO:0005813|GO:0005886|GO:0005902|GO:0006461|GO:0008013|GO:0008285|GO:0008360|GO:0008361|GO:0010642|GO:0014067|GO:0015629|GO:0016020|GO:0016324|GO:0017081|GO:0019902|GO:0022612|GO:0030033|GO:0030165|GO:0031528|GO:0031698|GO:0031982|GO:0032782|GO:0034635|GO:0035414|GO:0040023|GO:0043231|GO:0043621|GO:0045198|GO:0045859|GO:0045930|GO:0048471|GO:0051683|GO:0051898|GO:…	miR-1252-5p|miR-1266-5p|miR-149-5p|miR-2117|miR-3150a-3p|miR-3175|miR-346|miR-4261|miR-4434|miR-4478|miR-4516|miR-4518|miR-4651|miR-4723-5p|miR-517-5p|miR-548c-3p|miR-551b-5p|miR-5698|miR-570-3p|miR-5703|miR-608|miR-6508-5p|miR-651-3p|miR-6734-3p|miR-6737-5p|miR-6741-5p|miR-6748-3p|miR-6748-5p|miR-6756-5p|miR-6763-5p|miR-6766-5p|miR-6770-5p|miR-6812-5p|miR-6819-5p|miR-6830-5p|miR-6864-5p|miR-6870…		-1.14	0.12	-0.37	-1.27	0.65	0.71	0.71	0.96	2.73	0.15	0.56	1.89	3.56	7.63	8.22117	7.72298	6.58053	8.09748
A_22_P00006980		(NA)							-1.42	0.04	1.35	-1.47	0.81	0.88	0.88	1.2	2.73	0.04	2.3	1.71	2.27	2.77	2.46663	3.76983	2.34495	2.42291
ADAMTS18	ADAM metallopeptidase with thrombospondin type 1 motif, 18	protein coding	ENSG00000140873	170692		GO:0001654|GO:0090331	miR-1292-5p|miR-142-5p|miR-148a-3p|miR-148b-3p|miR-152-3p|miR-16-1-3p|miR-182-5p|miR-1911-5p|miR-29a-3p|miR-29b-3p|miR-29c-3p|miR-302e|miR-3163|miR-326|miR-330-5p|miR-3662|miR-371b-5p|miR-373-5p|miR-377-5p|miR-3915|miR-4262|miR-4264|miR-4275|miR-4276|miR-4459|miR-4461|miR-451b|miR-4530|miR-466|miR-4660|miR-4694-3p|miR-4789-3p|miR-5003-3p|miR-502-5p|miR-520f-3p|miR-548ao-5p|miR-548ax|miR-556-3p|mi…		2.67	0.19	0.96	2.48	1.53	1.66	1.66	2.26	2.72	0.09	0.62	1.48	3.31	3.67	2.5901	3.35524	6.02669	2.39537
ENSG00000237899		lincRNA	ENSG00000237899						1.16	0.28	-0.01	0.88	0.66	0.72	0.72	0.98	2.72	0.37	0.01	1.12	2.17	2.96	2.85996	2.56833	3.72473	2.58163
CCDC23	coiled-coil domain containing 23	protein coding	ENSG00000177868	374969		GO:0009306|GO:0010596|GO:0031397|GO:0045177	miR-1273h-5p|miR-148b-5p|miR-30b-3p|miR-3143|miR-3663-5p|miR-3689a-3p|miR-3689b-3p|miR-3689c|miR-371a-5p|miR-3914|miR-3941|miR-4434|miR-4516|miR-4531|miR-4670-3p|miR-5000-5p|miR-548as-3p|miR-548az-5p|miR-5703|miR-6760-3p|miR-6779-5p|miR-6780a-5p|miR-6874-3p|miR-7106-5p|miR-8485		-1.13	-0.37	-0.83	-0.76	0.65	0.7	0.7	0.95	2.72	0.55	1.64	0.96	4.12	7.54	8.00801	7.54706	6.42095	8.37383
A_21_P0012081		(NA)							-1.23	0.27	2.49	-1.51	0.71	0.77	0.77	1.04	2.72	0.34	5.51	2.13	5.16	3.66	2.86268	5.07819	3.84416	2.58874
SAMD8	sterile alpha motif domain containing 8	protein coding	ENSG00000156671	142891		GO:0030176|GO:0046513|GO:2000303	miR-1-3p|miR-1252-5p|miR-126-5p|miR-1277-5p|miR-1278|miR-1297|miR-130a-3p|miR-130a-5p|miR-130b-3p|miR-130b-5p|miR-135a-5p|miR-135b-5p|miR-141-3p|miR-142-5p|miR-143-3p|miR-148a-5p|miR-153-5p|miR-186-5p|miR-190a-3p|miR-194-5p|miR-197-3p|miR-197-5p|miR-200a-3p|miR-206|miR-21-3p|miR-215-3p|miR-22-5p|miR-23a-3p|miR-23b-3p|miR-23c|miR-26a-1-3p|miR-26a-2-3p|miR-26a-5p|miR-26b-5p|miR-28-5p|miR-301a-3p|mi…		1.38	-0.03	-1.08	1.41	0.8	0.86	0.86	1.17	2.71	0.02	1.77	1.67	1.96	4.46	4.64528	3.59449	4.97718	4.67312
TNFRSF10A	tumor necrosis factor receptor superfamily, member 10a	protein coding	ENSG00000104689	8797	04060|04210|04650|05162|05164	GO:0002020|GO:0005035|GO:0005515|GO:0005886|GO:0006915|GO:0006919|GO:0007165|GO:0007166|GO:0008134|GO:0009986|GO:0010939|GO:0012501|GO:0016021|GO:0036462|GO:0043154|GO:0070266|GO:0097191|GO:0097296|GO:0097300|GO:1902041	miR-145-5p|miR-5095|miR-5195-3p|miR-6765-3p|miR-6778-3p|miR-7151-3p	ANK2	1.37	-0.66	0.15	2.03	0.79	0.85	0.85	1.16	2.71	0.91	0.14	2.73	3.68	4.74	3.8143	4.62064	5.99276	4.47211
LOC101929578	transcription factor CP2-like	other ncRNA							1.27	-0.03	-0.59	1.3	0.73	0.79	0.79	1.08	2.71	0.03	0.88	1.68	1.77	2.99	2.95015	2.38721	3.65602	2.97721
WBSCR16	Williams-Beuren syndrome chromosome region 16	protein coding	ENSG00000274523	81554		GO:0044822	miR-1207-3p|miR-185-5p|miR-1910-3p|miR-3714|miR-4306|miR-4492|miR-4644|miR-4645-5p|miR-4663|miR-4673|miR-4755-3p|miR-548aa|miR-548ac|miR-548an|miR-548ap-3p|miR-548bb-3p|miR-548d-3p|miR-548h-3p|miR-548t-3p|miR-548z|miR-6511a-5p|miR-6815-3p	AIP|ANAPC5|ATF1|BAZ2B|C16orf63|CDC27|DDX19A|DEDD|ELAVL1|G3BP1|GCN1L1|GRSF1|GSTO1|GTF2I|HEATR2|HNRPH1|HSF1|KARS|MRPL44|MRPS12|NFYC|PCBP1|PDCD11|PEX5|PHC3|PLEKHJ1|POLDIP3|POLR2E|PRICKLE3|PRPF40A|PRPF4|PSMD3|PTBP1|RXRB|STIP1|THOC4|WDR1|WDR77|XRN2|YBX1|ZNF317|ZNF672	1.04	0.13	-1.06	0.91	0.6	0.65	0.65	0.88	2.71	0.16	2.53	1.37	2.66	5.92	6.29994	5.11126	6.1505	6.17458
PIGL	phosphatidylinositol glycan anchor biosynthesis, class L	protein coding	ENSG00000108474	9487	00563|01100	GO:0005789|GO:0006501|GO:0016254|GO:0043687|GO:0044267	miR-3189-3p|miR-378g|miR-4271|miR-4483|miR-4651|miR-4725-3p|miR-513b-5p|miR-608|miR-659-3p|miR-6737-5p|miR-6762-3p|miR-6780b-5p|miR-6812-5p|miR-6819-5p|miR-6853-3p	CKAP5|IFIT2|KLF6|KLHDC4|LGALS14|PARP2|RIN2|TAF4B|WDR79	1.03	-0.16	-0.47	1.19	0.59	0.64	0.64	0.87	2.71	0.22	0.87	1.98	1.84	6.12	5.98415	5.67137	6.69745	6.14443
BTN1A1	butyrophilin, subfamily 1, member A1	protein coding	ENSG00000124557	696		GO:0004872|GO:0005615|GO:0005887	miR-1273f|miR-18a-5p|miR-18b-5p|miR-3125|miR-3198|miR-320e|miR-3911|miR-3916|miR-4279|miR-4294|miR-4309|miR-4446-3p|miR-4531|miR-4645-5p|miR-4673|miR-4721|miR-4735-3p|miR-4802-5p|miR-5004-5p|miR-513a-5p|miR-5589-5p|miR-651-3p|miR-6857-3p|miR-6859-5p|miR-6892-5p|miR-7159-5p|miR-765|miR-877-5p		1.15	-0.37	-0.61	1.51	0.66	0.71	0.71	0.97	2.71	0.53	1.05	2.36	1.96	2.86	2.61146	2.37071	3.51823	2.97748
A_21_P0005914		(NA)							0.92	-0.16	-0.48	1.08	0.53	0.57	0.57	0.78	2.71	0.26	1.01	2.03	1.82	2.4	2.28612	1.97283	2.89204	2.44885
A_33_P3225983		(NA)							-1.28	-0.31	2.35	-0.98	0.74	0.8	0.8	1.09	2.7	0.37	4.98	1.12	5.39	6.54	5.39788	8.05812	6.77386	5.70448
BAIAP2	BAI1-associated protein 2	protein coding	ENSG00000175866	10458	04520|04810	GO:0005515|GO:0005737|GO:0005829|GO:0005886|GO:0007264|GO:0007409|GO:0008022|GO:0008286|GO:0008360|GO:0009617|GO:0032956|GO:0038096|GO:0042802|GO:0045087|GO:0048010|GO:0051017|GO:0051764|GO:0070062|GO:0070064	miR-1275|miR-149-5p|miR-17-3p|miR-3065-3p|miR-3148|miR-3160-3p|miR-328-5p|miR-331-3p|miR-361-3p|miR-3618|miR-3665|miR-4261|miR-4262|miR-4302|miR-4316|miR-4447|miR-4496|miR-4505|miR-4532|miR-4534|miR-4689|miR-485-3p|miR-5010-3p|miR-539-3p|miR-548an|miR-5787|miR-6124|miR-651-3p|miR-6756-5p|miR-6766-5p|miR-6796-5p|miR-6858-5p|miR-6885-5p|miR-7155-5p|miR-7160-5p|miR-8485	ASB10|CHERP|E2F4|IGHMBP2|KRT7|MAPK8IP2|NARG1|NLRP1|PAX8|SCT|TRIM10|TTC13|ZNF628|ZNF771|ZNF804B	1.5	-0.68	-0.12	2.18	0.87	0.94	0.94	1.28	2.69	0.85	0.1	2.65	3.06	5.45	4.61105	5.1748	6.67327	5.29554
A_21_P0007460		(NA)							-0.93	-0.12	0.69	-0.82	0.54	0.58	0.58	0.8	2.69	0.17	1.63	1.35	2.02	2.44	2.23029	3.03773	2.10375	2.34654
RNF41	ring finger protein 41, E3 ubiquitin protein ligase	protein coding	ENSG00000181852	10193	04144	GO:0000209|GO:0004842|GO:0005515|GO:0005829|GO:0008285|GO:0010498|GO:0017160|GO:0030336|GO:0043408|GO:0051865|GO:0051896|GO:0061630|GO:0097191|GO:2000377|GO:2000379	miR-1200|miR-1224-3p|miR-1227-3p|miR-1236-3p|miR-1254|miR-1260a|miR-1260b|miR-1296-3p|miR-1302|miR-15a-5p|miR-15b-5p|miR-16-1-3p|miR-16-5p|miR-188-5p|miR-195-5p|miR-218-5p|miR-219a-1-3p|miR-24-3p|miR-2682-5p|miR-29a-5p|miR-29b-1-5p|miR-3116|miR-3135b|miR-3160-5p|miR-3168|miR-3170|miR-3182|miR-3190-3p|miR-3192-5p|miR-328-5p|miR-34a-5p|miR-34b-5p|miR-34c-5p|miR-3652|miR-3653-5p|miR-3686|miR-3692-5p…		-1.18	0.04	-0.38	-1.22	0.68	0.74	0.74	1	2.69	0.04	0.54	1.69	3.35	5.24	5.78678	5.36848	4.19046	5.74896
ENSG00000231774		lincRNA	ENSG00000231774						0.96	-0.34	-0.61	1.3	0.55	0.6	0.6	0.81	2.69	0.62	1.34	2.43	1.92	5.39	5.20624	4.94069	5.8958	5.55066
A_21_P0013456		(NA)							-1.08	0.28	1.34	-1.36	0.63	0.68	0.68	0.92	2.69	0.4	3.18	2.2	2.68	3.16	2.9423	4.00181	2.91811	2.66196
LOC100134868	uncharacterized LOC100134868	other ncRNA	ENSG00000125804	284800					-1.22	0.26	2.01	-1.48	0.7	0.76	0.76	1.04	2.69	0.33	4.45	2.1	3.98	6.76	6.20701	7.95566	6.73967	5.9427
PRDM6	PR domain containing 6	protein coding	ENSG00000061455	93166			miR-106a-5p|miR-106b-5p|miR-1250-3p|miR-127-5p|miR-1468-3p|miR-17-5p|miR-181a-2-3p|miR-185-3p|miR-18a-5p|miR-18b-5p|miR-1914-5p|miR-19a-5p|miR-19b-1-5p|miR-19b-2-5p|miR-200a-5p|miR-200b-5p|miR-204-5p|miR-208a-5p|miR-208b-5p|miR-20a-5p|miR-20b-5p|miR-211-5p|miR-216b-5p|miR-3124-3p|miR-3125|miR-3140-3p|miR-3199|miR-330-3p|miR-338-5p|miR-3663-5p|miR-3916|miR-3928-5p|miR-4287|miR-4314|miR-4436a|miR-4…		-1.5	0.61	1.35	-2.11	0.87	0.94	0.94	1.28	2.69	0.72	2.12	2.54	2.03	6.64	6.76798	7.50924	6.00608	6.15935
EGR3	early growth response 3	protein coding	ENSG00000179388	1960	05161|05203	GO:0001938|GO:0002042|GO:0003700|GO:0007517|GO:0007623|GO:0035767|GO:0035924|GO:0043066|GO:0044344	let-7a-2-3p|let-7g-3p|miR-1178-3p|miR-1250-3p|miR-1253|miR-1273h-3p|miR-1275|miR-1279|miR-1281|miR-1283|miR-1285-3p|miR-1294|miR-1296-3p|miR-130a-5p|miR-148a-3p|miR-148b-3p|miR-149-3p|miR-152-3p|miR-182-5p|miR-196a-3p|miR-1972|miR-203a-3p|miR-212-5p|miR-216a-5p|miR-23a-3p|miR-23b-3p|miR-23c|miR-302f|miR-30c-1-3p|miR-30c-2-3p|miR-3144-5p|miR-3148|miR-3164|miR-3175|miR-3179|miR-3187-5p|miR-335-3p|m…		1.23	-0.05	0.47	1.28	0.72	0.78	0.78	1.06	2.68	0.05	0.66	1.69	3.51	3.21	2.60048	3.11309	4.34772	2.64687
A_21_P0007372		(NA)							1.22	0.38	-0.2	0.84	0.71	0.76	0.76	1.04	2.68	0.51	0.23	0.97	1.92	2.58	2.64112	2.06451	3.28153	2.26456
IPO13	importin 13	protein coding	ENSG00000117408	9670		GO:0005515|GO:0006606	miR-129-5p|miR-3154|miR-3680-3p|miR-4300|miR-4425|miR-4651|miR-4695-5p|miR-4709-3p|miR-4747-5p|miR-5089-5p|miR-5196-5p|miR-5591-5p|miR-608|miR-6726-5p|miR-6849-3p|miR-920|miR-922		0.86	0.12	-0.07	0.74	0.5	0.54	0.54	0.73	2.68	0.19	0.11	1.32	2.07	5.65	5.54715	5.35668	6.21518	5.42927
A_22_P00015744		(NA)							-0.97	-0.16	1.82	-0.81	0.56	0.61	0.61	0.83	2.68	0.23	5.08	1.27	5.35	10.42	9.59112	11.567	10.5992	9.74721
TNFAIP8L1	tumor necrosis factor, alpha-induced protein 8-like 1	protein coding	ENSG00000185361	126282		GO:0005515|GO:0005737|GO:0032007	miR-1229-3p|miR-125a-5p|miR-125b-5p|miR-1281|miR-1285-3p|miR-1343-3p|miR-1910-5p|miR-193b-5p|miR-211-3p|miR-214-3p|miR-218-5p|miR-222-5p|miR-302e|miR-30a-3p|miR-30c-1-3p|miR-30c-2-3p|miR-30d-3p|miR-30e-3p|miR-3135b|miR-3615|miR-3619-5p|miR-3653-5p|miR-372-5p|miR-378a-5p|miR-4267|miR-4276|miR-4277|miR-4316|miR-4319|miR-4435|miR-4459|miR-4478|miR-4483|miR-4508|miR-4516|miR-4722-5p|miR-4733-3p|miR-5…		-0.95	0.17	2.33	-1.13	0.55	0.6	0.6	0.81	2.68	0.26	6.54	2.02	6.45	10.34	9.48213	11.6375	10.6849	9.30972
Hs.684462		(NA)							-1.13	0.45	1.07	-1.59	0.66	0.71	0.71	0.97	2.68	0.7	2.24	2.51	2.05	2.63	2.69286	3.3081	2.17336	2.24245
DEPDC1-AS1	DEPDC1 antisense RNA 1	asRNA	ENSG00000234264	101927220					1.33	0.69	-0.62	0.64	0.78	0.84	0.84	1.14	2.67	1	0.86	0.6	2.23	2.74	3.22058	1.90971	3.24413	2.52748
A_22_P00016721		(NA)							1.32	-0.03	-0.6	1.35	0.77	0.83	0.83	1.13	2.67	0.02	0.84	1.65	1.73	3.42	3.37191	2.79328	4.11582	3.39813
A_22_P00017519		(NA)							-0.77	-0.13	0.32	-0.64	0.45	0.48	0.48	0.66	2.67	0.24	0.76	1.25	1.77	2.37	2.31044	2.76534	1.99622	2.44126
Hs.131226		(NA)							-1.24	-0.29	2.26	-0.95	0.72	0.78	0.78	1.06	2.67	0.35	4.91	1.12	5.29	10.57	9.4875	12.0323	10.7951	9.77433
A_33_P3783812		(NA)							-1.43	0.18	2.2	-1.62	0.84	0.9	0.9	1.23	2.67	0.17	4.06	1.88	3.69	3.41	2.75417	4.76577	3.33162	2.56999
PLCB4	phospholipase C, beta 4	protein coding	ENSG00000101333	5332	00562|01100|04015|04020|04022|04062|04070|04071|04072|04261|04270|04310|04540|04611|04713|04720|04723|04724|04725|04726|04728|04730|04750|04911|04912|04915|04916|04918|04919|04921|04922|04924|04925|04933|04961|04970|04971|04972|05010|05016|05142|05143|05146|05200	GO:0004629|GO:0005515|GO:0005829|GO:0043647|GO:0044281	miR-124-5p|miR-1255b-2-3p|miR-1264|miR-1271-5p|miR-1303|miR-183-3p|miR-183-5p|miR-18b-3p|miR-190a-3p|miR-19a-5p|miR-19b-1-5p|miR-19b-2-5p|miR-2052|miR-214-3p|miR-3145-3p|miR-3168|miR-335-3p|miR-3619-5p|miR-3622b-5p|miR-365a-3p|miR-365b-3p|miR-3680-3p|miR-3688-5p|miR-382-5p|miR-3928-3p|miR-3943|miR-4261|miR-4302|miR-4451|miR-4496|miR-450b-5p|miR-466|miR-4760-3p|miR-4775|miR-4789-3p|miR-4789-5p|miR…		-1.16	0.51	1.64	-1.67	0.68	0.73	0.73	1	2.67	0.79	3.69	2.59	2.96	2.69	2.49654	3.62723	2.46476	1.99061
A_33_P3397658		(NA)							1.28	-0.69	1.67	1.97	0.75	0.81	0.81	1.1	2.66	1.04	3.35	2.81	7.23	5.24	3.49951	5.85728	7.14102	4.1862
ANKRD45	ankyrin repeat domain 45	protein coding	ENSG00000183831	339416		GO:0005515	let-7f-2-3p|miR-1185-1-3p|miR-1185-2-3p|miR-1224-3p|miR-149-3p|miR-185-5p|miR-224-5p|miR-302e|miR-30c-1-3p|miR-30c-2-3p|miR-3150b-3p|miR-3191-5p|miR-3194-5p|miR-3202|miR-338-5p|miR-3609|miR-3652|miR-371b-5p|miR-373-5p|miR-3942-3p|miR-4255|miR-4275|miR-4306|miR-4428|miR-4430|miR-4436a|miR-4441|miR-4464|miR-4476|miR-4516|miR-4644|miR-4653-3p|miR-4653-5p|miR-4662a-5p|miR-4672|miR-4700-3p|miR-4717-3p…		-1.03	-0.15	1.89	-0.88	0.6	0.65	0.65	0.89	2.66	0.21	4.91	1.28	5.14	10.29	9.44934	11.492	10.4613	9.60428
A_21_P0013011		(NA)							-1.14	-0.03	0.63	-1.12	0.67	0.72	0.72	0.98	2.66	0.03	1.08	1.55	1.73	2.53	2.48299	3.13799	1.99436	2.50917
Hs.645461		(NA)							-1.16	0.39	1.3	-1.56	0.68	0.74	0.74	1	2.66	0.56	2.76	2.35	2.3	2.98	2.89176	3.79415	2.6297	2.49733
PIAS4	protein inhibitor of activated STAT, 4	protein coding	ENSG00000105229	51588	04064|04120|04630	GO:0000724|GO:0005515|GO:0005634|GO:0005654|GO:0005737|GO:0006281|GO:0006302|GO:0006303|GO:0016925|GO:0019789|GO:0031625|GO:0033235|GO:0043687|GO:0044267|GO:0045892|GO:0061665|GO:1902174	miR-198|miR-4257|miR-4645-5p|miR-4673|miR-4755-3p|miR-5192|miR-520a-5p|miR-525-5p		1.14	-0.1	-0.9	1.24	0.67	0.72	0.72	0.98	2.65	0.12	1.75	1.79	1.87	3.87	3.97104	3.17959	4.31502	4.07558
A_24_P195272		(NA)							0.99	0.08	-0.53	0.91	0.58	0.62	0.62	0.85	2.65	0.1	1.05	1.43	1.74	2.83	2.91014	2.30026	3.28551	2.8344
Hs.131035		(NA)							-0.94	0.03	1.8	-0.97	0.55	0.59	0.59	0.81	2.65	0.04	5.17	1.66	5.1	7.32	6.62461	8.39806	7.46259	6.59495
A_22_P00006414		(NA)							1.2	-0.25	-0.28	1.44	0.7	0.76	0.76	1.03	2.65	0.3	0.36	2.05	2.15	2.83	2.47748	2.44251	3.63927	2.72538
EPB41L4A-AS1	EPB41L4A antisense RNA 1	asRNA							-1.1	-0.27	-1.43	-0.84	0.65	0.7	0.7	0.95	2.65	0.36	3.31	1.1	5.87	9.73	10.595	9.43241	8.32835	10.8603
ZNF623	zinc finger protein 623	protein coding	ENSG00000183309	9831			miR-1185-5p|miR-1199-5p|miR-1273g-3p|miR-1537-5p|miR-2054|miR-27a-5p|miR-3133|miR-3180-5p|miR-3679-5p|miR-3934-5p|miR-4257|miR-4267|miR-4286|miR-4297|miR-4446-3p|miR-4481|miR-4486|miR-4492|miR-4524a-3p|miR-466|miR-4672|miR-4789-3p|miR-542-3p|miR-544b|miR-548an|miR-552-3p|miR-671-5p|miR-6719-3p|miR-6747-5p|miR-6751-3p|miR-6768-5p|miR-6807-5p|miR-6815-5p|miR-6823-5p|miR-6829-5p|miR-6858-5p|miR-6865…		1.05	-0.35	-0.65	1.4	0.61	0.66	0.66	0.91	2.65	0.55	1.26	2.33	1.86	3.32	3.13272	2.8366	3.88594	3.48351
CEND1	cell cycle exit and neuronal differentiation 1	protein coding	ENSG00000184524	51286			miR-1237-5p|miR-185-3p|miR-193a-3p|miR-193b-3p|miR-214-3p|miR-3168|miR-3184-5p|miR-3619-5p|miR-3650|miR-423-5p|miR-4417|miR-4483|miR-4488|miR-4532|miR-4697-5p|miR-4747-3p|miR-4783-5p|miR-516a-3p|miR-516b-3p|miR-6085|miR-6721-5p|miR-6753-3p|miR-6813-5p|miR-6829-5p|miR-6867-5p|miR-7107-3p|miR-7160-5p|miR-7162-5p|miR-761		-1.2	-0.39	0.49	-0.81	0.7	0.76	0.76	1.04	2.65	0.53	0.72	0.94	1.86	7.45	7.22708	8.10326	6.90184	7.61448
RRP1	ribosomal RNA processing 1	protein coding	ENSG00000160214	8568		GO:0005634|GO:0005730|GO:0044822	miR-4479|miR-4667-5p|miR-4691-3p|miR-4700-5p|miR-8089		1.09	0.41	-0.5	0.68	0.64	0.69	0.69	0.95	2.64	0.64	0.84	0.83	1.95	5.7	5.9806	5.06901	6.16033	5.57032
HPN-AS1	HPN antisense RNA 1	asRNA							0.96	0.06	0.08	0.9	0.57	0.61	0.61	0.83	2.64	0.08	0.1	1.45	2.44	2.49	2.24152	2.25579	3.21846	2.17944
BCO2	beta-carotene oxygenase 2	protein coding	ENSG00000197580	83875		GO:0001523|GO:0005622|GO:0005739|GO:0005759|GO:0006766|GO:0006775|GO:0007603|GO:0016116|GO:0016119|GO:0016121|GO:0016702|GO:0044281|GO:0051881|GO:0055114|GO:2000377	miR-1226-5p|miR-1233-3p|miR-1297|miR-1302|miR-135a-3p|miR-142-5p|miR-18b-3p|miR-1909-5p|miR-208a-5p|miR-208b-5p|miR-3065-3p|miR-3122|miR-3166|miR-3180-5p|miR-3646|miR-3913-5p|miR-4298|miR-4328|miR-556-3p|miR-5590-3p|miR-5693|miR-6511b-5p|miR-6515-3p|miR-6750-5p|miR-6799-5p|miR-6809-5p|miR-6811-5p|miR-6822-5p|miR-6836-3p|miR-6892-3p|miR-7155-5p|miR-877-3p|miR-944		-1.38	0.09	1.64	-1.46	0.81	0.87	0.87	1.19	2.64	0.08	2.99	1.72	2.74	2.83	2.38533	3.94108	2.5649	2.29817
ENSG00000253713		lincRNA	ENSG00000253713						0.85	-0.22	-0.84	1.07	0.5	0.54	0.54	0.73	2.63	0.4	2.35	2.16	2.07	2.54	2.59454	1.98139	2.82718	2.81747
NOVA1	neuro-oncological ventral antigen 1	protein coding	ENSG00000139910	4857		GO:0003723|GO:0005634|GO:0005730|GO:0006396|GO:0007268|GO:0007626|GO:0008380|GO:0043231|GO:0044822	let-7a-5p|let-7b-5p|let-7c-3p|let-7c-5p|let-7d-5p|let-7e-5p|let-7f-5p|let-7g-5p|let-7i-5p|miR-1-5p|miR-101-3p|miR-103a-3p|miR-107|miR-1206|miR-1207-3p|miR-1224-5p|miR-1231|miR-1238-5p|miR-1244|miR-1248|miR-1252-3p|miR-1254|miR-126-5p|miR-1265|miR-1271-5p|miR-1272|miR-1273f|miR-1288-5p|miR-1303|miR-130b-5p|miR-132-3p|miR-1323|miR-133a-5p|miR-136-5p|miR-137|miR-138-1-3p|miR-140-3p|miR-146a-3p|miR-1…	NBEA	-1.53	-0.77	-1.12	-0.76	0.9	0.97	0.97	1.32	2.63	0.94	1.58	0.62	3.79	5.45	5.90008	5.54177	4.01367	6.66519
Hs.745450		(NA)							-1.59	-0.6	1.09	-0.99	0.94	1.01	1.01	1.38	2.63	0.64	1.43	0.83	2.26	3.83	3.23164	4.91743	3.32494	3.83049
CCNG2	cyclin G2	protein coding	ENSG00000138764	901	04068|04115	GO:0000075	let-7a-2-3p|let-7a-3p|let-7b-3p|let-7f-1-3p|let-7g-3p|miR-106a-5p|miR-106b-5p|miR-1229-3p|miR-1271-5p|miR-1273h-3p|miR-1278|miR-1283|miR-1290|miR-1295b-3p|miR-1304-3p|miR-1321|miR-1343-3p|miR-135a-5p|miR-135b-5p|miR-137|miR-142-5p|miR-144-3p|miR-153-5p|miR-154-3p|miR-16-1-3p|miR-17-5p|miR-183-3p|miR-1910-3p|miR-192-3p|miR-20a-5p|miR-20b-5p|miR-2115-5p|miR-216a-5p|miR-26b-3p|miR-3065-3p|miR-3065-5…		-1.16	0.24	0.07	-1.39	0.68	0.74	0.74	1	2.63	0.3	0.07	2.03	2.5	3.4	3.84493	3.67764	2.52236	3.60856
A_33_P3407049		(NA)							-1.71	-0.03	0.89	-1.67	1	1.09	1.09	1.48	2.63	0.02	1	1.54	1.7	3.48	3.43596	4.361	2.65378	3.46974
A_21_P0008919		(NA)							-1.05	0.03	1.87	-1.07	0.62	0.67	0.67	0.91	2.62	0.03	4.71	1.62	4.59	7.04	6.34608	8.18738	7.13896	6.32086
C5orf28	chromosome 5 open reading frame 28	protein coding	ENSG00000151881	64417			miR-1179|miR-1199-5p|miR-1200|miR-1243|miR-129-5p|miR-1468-3p|miR-203a-3p|miR-2053|miR-302a-3p|miR-302b-3p|miR-302c-3p|miR-302d-3p|miR-302e|miR-3121-3p|miR-3163|miR-3180-5p|miR-3664-3p|miR-3680-3p|miR-372-3p|miR-373-3p|miR-374a-5p|miR-374b-5p|miR-376a-3p|miR-376b-3p|miR-4286|miR-4288|miR-4307|miR-450b-5p|miR-4511|miR-4514|miR-4517|miR-4692|miR-4731-3p|miR-4775|miR-4801|miR-488-5p|miR-5197-3p|miR-…	CAND1|CCAR1|PTBP2|SP3|TRIM13|TRIM33|ZCCHC7	-1.13	-0.21	1.78	-0.91	0.67	0.72	0.72	0.98	2.62	0.26	4.13	1.18	4.35	9.09	8.29149	10.2788	9.15353	8.50223
A_33_P3299781		(NA)							-1.63	0.07	2.24	-1.7	0.97	1.04	1.04	1.42	2.62	0.05	3.52	1.66	3.28	4.45	3.73184	5.90988	4.27796	3.66638
ENSG00000237807		lincRNA	ENSG00000237807						1.87	-0.09	-1.34	1.96	1.11	1.2	1.2	1.64	2.6	0.06	1.51	1.66	1.76	4.55	4.69755	3.44763	5.31654	4.78593
A_21_P0006998		(NA)							-1.06	0.26	2.5	-1.32	0.63	0.68	0.68	0.92	2.6	0.37	6.22	2.1	6	6.56	5.70006	7.94404	6.88639	5.44039
LOC101060385	uncharacterized LOC101060385	lincRNA	ENSG00000228799	101060385					0.91	-0.32	-0.67	1.23	0.54	0.59	0.59	0.8	2.59	0.58	1.54	2.32	1.81	2.59	2.46607	2.12168	3.03248	2.78801
A_22_P00013558		(NA)							-0.94	0.3	0.78	-1.24	0.56	0.6	0.6	0.82	2.59	0.51	1.84	2.25	1.84	2.42	2.47788	2.95662	2.01965	2.17619
A_22_P00019636		(NA)							-1.74	0.39	3.41	-2.13	1.04	1.12	1.12	1.53	2.59	0.33	5.17	2.04	4.78	3.89	2.82486	5.84185	4.10541	2.43216
HLX	H2.0-like homeobox	protein coding	ENSG00000136630	3142		GO:0005515|GO:0007275|GO:0043565	miR-1537-3p|miR-30a-5p|miR-30b-5p|miR-30c-5p|miR-30d-5p|miR-30e-5p|miR-3919|miR-4306		1.97	0	-1.87	1.97	1.18	1.27	1.27	1.73	2.58	0	2.19	1.54	2.16	4.97	5.44199	3.56711	5.53721	5.43769
ALG6	ALG6, alpha-1,3-glucosyltransferase	protein coding	ENSG00000088035	29929	00510|01100	GO:0005789|GO:0006487|GO:0006488|GO:0016020|GO:0018279|GO:0043687|GO:0044267|GO:0046527	miR-1252-5p|miR-1255b-2-3p|miR-1277-5p|miR-153-5p|miR-16-1-3p|miR-190a-3p|miR-2681-5p|miR-30a-5p|miR-30b-5p|miR-30c-5p|miR-30d-5p|miR-30e-5p|miR-3194-5p|miR-33a-3p|miR-3613-3p|miR-3680-3p|miR-3928-5p|miR-3938|miR-409-3p|miR-4261|miR-4286|miR-4328|miR-4496|miR-4502|miR-4666b|miR-4670-3p|miR-4729|miR-4744|miR-4760-3p|miR-4772-3p|miR-4797-3p|miR-497-3p|miR-5010-3p|miR-5011-5p|miR-5089-5p|miR-511-3p|…	CCNB2|MCM6|POLQ|RNASEH2A	0.98	0.4	-0.19	0.58	0.59	0.63	0.63	0.86	2.58	0.7	0.27	0.76	1.86	7.06	7.18884	6.60001	7.58162	6.78893
Hs.638078		(NA)							-0.88	-0.48	0.76	-0.4	0.53	0.57	0.57	0.78	2.58	1.03	1.93	0.54	2.98	5.84	5.31343	6.55524	5.67267	5.79379
Hs.675932		(NA)							-1.47	0.12	3.35	-1.59	0.88	0.95	0.95	1.3	2.58	0.1	5.96	1.72	5.94	3.86	2.55491	5.78316	4.31087	2.43365
JPH2	junctophilin 2	protein coding	ENSG00000149596	57158		GO:0001786|GO:0005515|GO:0005546|GO:0005547|GO:0010314|GO:0014701|GO:0015278|GO:0032266|GO:0051209|GO:0055074|GO:0060314|GO:0060316|GO:0060402|GO:0070273|GO:0070300|GO:0080025	miR-1207-5p|miR-1273h-5p|miR-30b-3p|miR-3151-5p|miR-3689a-3p|miR-3689b-3p|miR-3689c|miR-4283|miR-4763-3p|miR-6747-3p|miR-6779-5p|miR-6780a-5p|miR-6864-5p|miR-7106-5p|miR-7150|miR-7515|miR-765|miR-769-5p	HEYL	-1.15	0.54	1.52	-1.69	0.69	0.75	0.75	1.02	2.58	0.84	3.31	2.57	2.61	2.75	2.63977	3.62249	2.46953	2.09945
A_22_P00015676		(NA)							0.99	-0.93	-1.17	1.92	0.59	0.64	0.64	0.87	2.57	2.16	2.89	3.62	2.66	2.74	2.41701	2.18057	3.1701	3.35144
FAM66D	family with sequence similarity 66, member D	lncRNA							1.14	-0.01	-1.32	1.15	0.68	0.74	0.74	1.01	2.57	0.01	2.8	1.56	2.63	4.86	5.24839	3.94368	5.08323	5.26
ATP8B3	ATPase, aminophospholipid transporter, class I, type 8B, member 3	protein coding	ENSG00000130270	148229			miR-1231|miR-3653-5p|miR-4279|miR-4725-5p|miR-4792|miR-504-5p|miR-511-5p|miR-6825-5p|miR-6887-3p		0.96	-0.58	-0.74	1.54	0.57	0.62	0.62	0.84	2.57	1.19	1.66	2.87	2.08	2.37	2.08848	1.92755	2.88359	2.66764
A_33_P3211834		(NA)							-1.7	-0.38	1.41	-1.32	1.02	1.1	1.1	1.5	2.57	0.32	1.82	1.09	2.22	5.14	4.56196	6.35427	4.65476	4.94279
ACVR2A	activin A receptor, type IIA	protein coding	ENSG00000121989	92	04060|04350|04550	GO:0001934|GO:0004674|GO:0004675|GO:0005515|GO:0005737|GO:0005886|GO:0005887|GO:0007178|GO:0010862|GO:0015026|GO:0030501|GO:0030509|GO:0032924|GO:0032927|GO:0034673|GO:0043235|GO:0045648|GO:0045669|GO:0045944|GO:0071773|GO:0098821	miR-105-5p|miR-1243|miR-1244|miR-1261|miR-128-3p|miR-1285-3p|miR-1290|miR-1305|miR-1321|miR-142-3p|miR-145-5p|miR-153-5p|miR-15a-5p|miR-15b-5p|miR-16-5p|miR-181a-5p|miR-181b-5p|miR-181c-5p|miR-181d-5p|miR-193b-5p|miR-195-5p|miR-199a-3p|miR-199b-3p|miR-202-3p|miR-203a-3p|miR-216a-3p|miR-223-3p|miR-2682-3p|miR-3120-3p|miR-3129-5p|miR-3144-3p|miR-3184-3p|miR-3187-5p|miR-32-3p|miR-3591-5p|miR-3613-3p…	ZBTB20	1.51	-0.01	-1.82	1.52	0.91	0.98	0.98	1.34	2.56	0.01	2.93	1.55	2.75	4.73	5.28581	3.48102	4.99142	5.29999
A_22_P00005192		(NA)							1.06	0.05	-0.37	1.01	0.64	0.69	0.69	0.94	2.56	0.05	0.57	1.44	1.67	2.54	2.49469	2.07806	3.13376	2.44782
PCSK1	proprotein convertase subtilisin/kexin type 1	protein coding	ENSG00000175426	5122		GO:0004252|GO:0005615|GO:0006508|GO:0007267|GO:0008152|GO:0016486|GO:0034774|GO:0043043|GO:0044267|GO:0050796	let-7g-3p|miR-1227-3p|miR-125a-3p|miR-1295b-5p|miR-1299|miR-181a-5p|miR-181b-5p|miR-181c-5p|miR-181d-5p|miR-183-3p|miR-1911-3p|miR-1912|miR-204-3p|miR-2052|miR-29a-5p|miR-3064-3p|miR-3126-5p|miR-3127-3p|miR-3162-5p|miR-3606-3p|miR-3646|miR-3664-3p|miR-3665|miR-3688-3p|miR-4251|miR-4261|miR-4262|miR-4314|miR-4422|miR-4516|miR-4524b-3p|miR-4531|miR-4642|miR-4645-5p|miR-4646-5p|miR-4673|miR-4713-5p|…		1.04	0.5	-0.61	0.54	0.63	0.68	0.68	0.92	2.56	0.86	1.13	0.63	2.21	2.66	3.07043	1.96379	3.00248	2.57075
LOC101927577	uncharacterized LOC101927577	lncRNA							1.02	-0.02	-1.15	1.03	0.61	0.66	0.66	0.9	2.56	0.02	2.73	1.57	2.56	4.04	4.37034	3.2336	4.2493	4.38567
A_33_P3414903		(NA)							-1.03	-0.02	1.88	-1.01	0.62	0.67	0.67	0.91	2.56	0.02	4.76	1.49	4.73	9.06	8.31263	10.2103	9.18382	8.33363
LINC00482	lincRNA 482	lincRNA							-1.42	-0.95	1.58	-0.47	0.85	0.92	0.92	1.26	2.56	1.36	2.66	0.35	3.96	3.82	2.65963	5.19018	3.77094	3.61062
Hs.369201		(NA)							-1.87	-0.96	1.26	-0.91	1.12	1.21	1.21	1.65	2.56	0.95	1.38	0.58	2.46	4.05	3.16971	5.39243	3.52516	4.1292
A_22_P00010431		(NA)							0.92	0.04	0.16	0.88	0.56	0.6	0.6	0.82	2.55	0.05	0.24	1.43	2.61	3.02	2.71563	2.83645	3.75961	2.67456
Hs.637708		(NA)							1.12	-0.3	-1.21	1.42	0.68	0.73	0.73	1	2.55	0.4	2.53	2.1	2.14	4.02	4.14772	3.24201	4.36542	4.44769
Hs.658594		(NA)							-1.19	-0.18	2.09	-1	0.72	0.77	0.77	1.05	2.55	0.2	4.55	1.22	4.75	3.55	2.61983	4.89281	3.70544	2.80277
KISS1R	KISS1 receptor	protein coding	ENSG00000116014	84634	04080	GO:0005515|GO:0005886|GO:0007218|GO:0008188|GO:0016021|GO:0043231	miR-4261|miR-4274|miR-4419a|miR-4520-3p|miR-4645-3p|miR-4786-5p		0.86	-0.44	-0.42	1.3	0.52	0.56	0.56	0.77	2.55	0.93	0.86	2.64	2.16	2.47	2.13914	2.16448	3.02813	2.57995
A_21_P0002515		(NA)							-0.82	0.33	0.51	-1.15	0.49	0.53	0.53	0.73	2.55	0.69	1.22	2.4	1.84	2.44	2.63353	2.80976	1.99324	2.30156
CCDC13	coiled-coil domain containing 13	protein coding	ENSG00000244607	152206		GO:0005515|GO:0005813|GO:0006974|GO:0031122|GO:0034451|GO:0035058	miR-1273g-5p|miR-129-5p|miR-1587|miR-1976|miR-3130-3p|miR-3182|miR-3620-5p|miR-371b-3p|miR-4527|miR-4534|miR-4656|miR-4685-5p|miR-4795-3p|miR-485-5p|miR-5088-5p|miR-544b|miR-5580-5p|miR-6503-5p|miR-6734-5p|miR-6752-5p|miR-6804-3p|miR-6837-5p|miR-6842-5p|miR-6884-5p|miR-7110-5p|miR-7111-3p	ANKRD15|CHERP|E2F4|IGHMBP2|LIMD1|NLRP1|STRN4|TTC13	1.04	-0.1	-0.45	1.14	0.63	0.68	0.68	0.93	2.54	0.12	0.74	1.72	1.66	2.73	2.62451	2.27128	3.31231	2.72267
A_21_P0004422		(NA)							0.91	-0.57	-0.76	1.48	0.55	0.6	0.6	0.81	2.54	1.21	1.8	2.87	2.06	3.07	2.81796	2.62421	3.53727	3.38305
CNOT10-AS1	CNOT10 antisense RNA 1	asRNA	ENSG00000251224						-1.38	-0.1	1.19	-1.28	0.84	0.9	0.9	1.23	2.54	0.09	1.89	1.37	2.03	2.49	2.14391	3.44097	2.05979	2.24791
Hs.661972		(NA)							-1.8	-0.83	2.76	-0.97	1.09	1.18	1.18	1.61	2.54	0.81	3.88	0.66	4.66	3.95	2.35408	5.94523	4.14259	3.18362
A_22_P00004733		(NA)							-1.23	0.41	0.97	-1.64	0.74	0.8	0.8	1.09	2.54	0.53	1.69	2.23	1.77	2.53	2.63942	3.20337	1.97579	2.23103
APBA1	amyloid beta (A4) precursor protein-binding, family A, member 1	protein coding	ENSG00000276497	320		GO:0005515|GO:0005829|GO:0007155|GO:0007268|GO:0007269|GO:0007399|GO:0008088|GO:0043005	let-7f-2-3p|miR-1185-1-3p|miR-1185-2-3p|miR-1207-3p|miR-1236-3p|miR-1275|miR-1291|miR-1304-3p|miR-1343-3p|miR-146b-3p|miR-149-3p|miR-149-5p|miR-185-5p|miR-188-3p|miR-190a-3p|miR-194-3p|miR-2113|miR-24-3p|miR-3138|miR-3145-3p|miR-3178|miR-3202|miR-329-3p|miR-331-3p|miR-3689d|miR-3919|miR-4262|miR-4297|miR-4306|miR-4314|miR-4318|miR-4320|miR-4417|miR-4455|miR-4486|miR-4492|miR-4531|miR-4644|miR-464…		-1.88	-0.12	1.88	-1.76	1.14	1.23	1.23	1.68	2.54	0.08	2.3	1.39	2.31	3.8	3.21358	5.21612	3.33729	3.33526
GABRB1	gamma-aminobutyric acid (GABA) A receptor, beta 1	protein coding	ENSG00000163288	2560	04080|04723|04726|04727|05032|05033	GO:0004890|GO:0005886|GO:0005887|GO:0006810|GO:0006811|GO:0007165|GO:0007268|GO:0015276|GO:0034220|GO:0055085|GO:0071420|GO:1902711	miR-103a-3p|miR-107|miR-1250-3p|miR-152-3p|miR-216b-5p|miR-30a-5p|miR-30b-5p|miR-30c-5p|miR-30d-5p|miR-30e-5p|miR-3125|miR-3144-5p|miR-3148|miR-3690|miR-3916|miR-3937|miR-4276|miR-4446-5p|miR-4463|miR-4753-3p|miR-4776-5p|miR-5010-3p|miR-5197-3p|miR-548a-3p|miR-548aa|miR-548ao-5p|miR-548ap-3p|miR-548ar-3p|miR-548ax|miR-548az-3p|miR-548e-3p|miR-548f-3p|miR-548t-3p|miR-5692a|miR-6810-5p|miR-6844|miR…		-1.79	0.48	1.87	-2.27	1.08	1.17	1.17	1.6	2.54	0.4	2.42	2.09	2.07	2.82	2.65284	4.04113	2.24799	2.17467
A_22_P00012600		(NA)							1.57	-0.22	-1.18	1.78	0.95	1.03	1.03	1.4	2.53	0.18	1.57	1.81	1.71	4.38	4.43054	3.46853	5.03362	4.6477
VTA1	vesicle (multivesicular body) trafficking 1	protein coding	ENSG00000009844	51534	04144	GO:0005515|GO:0005829|GO:0008022|GO:0016032|GO:0016197|GO:0019058|GO:0046755|GO:0061024|GO:0070062|GO:0071985	miR-10a-5p|miR-10b-5p|miR-1273f|miR-1276|miR-1277-5p|miR-183-3p|miR-1911-3p|miR-3117-5p|miR-32-3p|miR-337-3p|miR-33a-3p|miR-3646|miR-3929|miR-3941|miR-3977|miR-424-3p|miR-4261|miR-4266|miR-4419a|miR-4419b|miR-4478|miR-450a-2-3p|miR-4530|miR-4533|miR-4645-5p|miR-4673|miR-4690-5p|miR-4694-3p|miR-4695-5p|miR-4713-5p|miR-4735-5p|miR-4766-5p|miR-4803|miR-495-3p|miR-511-5p|miR-5584-5p|miR-5688|miR-580-…	ANAPC5|ATF1|ATF2|C16orf63|CDC27|CDC5L|CLPX|CNOT7|CUL1|DDX19A|DHX35|DRAP1|FBXO28|FOXN2|FUSIP1|GTF2H1|ING5|KPNA1|KPNA4|MCM4|MRPL44|NAT13|NEDD1|NFYC|NUFIP1|POLDIP3|PRPF40A|PSMD12|PSPC1|RNASEH1|RNF7|RNGTT|RPAP3|TNKS2|TOX4|UTP15|UTP18|UTX|WDR8|YBX1|ZNF322A	0.79	0.31	-0.75	0.48	0.48	0.52	0.52	0.7	2.53	0.66	2.15	0.76	2.81	6.03	6.44634	5.38328	6.17013	6.13463
RBM43	RNA binding motif protein 43	protein coding	ENSG00000184898	375287			miR-122-5p|miR-1253|miR-1268a|miR-1268b|miR-1303|miR-1321|miR-1323|miR-135a-3p|miR-3179|miR-329-5p|miR-33a-3p|miR-3657|miR-3658|miR-3679-3p|miR-371b-5p|miR-373-5p|miR-3974|miR-4284|miR-4328|miR-4419a|miR-4480|miR-4486|miR-4524b-3p|miR-4540|miR-4653-3p|miR-4691-3p|miR-4698|miR-4733-5p|miR-4739|miR-4753-5p|miR-4756-5p|miR-4764-5p|miR-4768-3p|miR-515-5p|miR-519e-5p|miR-541-3p|miR-541-5p|miR-548o-3p|…		-0.88	-0.25	1.76	-0.63	0.53	0.58	0.58	0.79	2.53	0.42	5.15	0.97	5.66	8.8	7.91284	9.91719	9.03605	8.16068
Hs.446091		(NA)							-1.07	-0.19	2.75	-0.88	0.65	0.7	0.7	0.96	2.53	0.24	6.56	1.16	7.06	4.19	2.86725	5.81282	4.74114	3.05942
TTC23L	tetratricopeptide repeat domain 23-like	protein coding	ENSG00000205838	153657		GO:0005515	miR-494-5p|miR-511-5p|miR-6875-3p|miR-6889-3p		0.9	-0.54	-0.5	1.44	0.55	0.59	0.59	0.81	2.53	1.16	1.03	2.82	2.22	2.37	1.99863	2.0429	2.94457	2.54147
A_22_P00009793		(NA)							-1.23	0.1	1.39	-1.33	0.74	0.8	0.8	1.1	2.53	0.1	2.69	1.68	2.43	4.6	4.2625	5.55258	4.32529	4.16422
A_33_P3402495		(NA)							-1.69	-0.17	3.06	-1.51	1.03	1.11	1.11	1.51	2.53	0.13	4.67	1.3	4.78	3.85	2.54264	5.78028	4.09402	2.71709
CNIH4	cornichon family AMPA receptor auxiliary protein 4	protein coding	ENSG00000143771	29097		GO:0005515|GO:0005783|GO:0005793|GO:0006888|GO:0031730	miR-10a-5p|miR-10b-5p|miR-1185-5p|miR-1277-5p|miR-1324|miR-135a-5p|miR-135b-5p|miR-146a-5p|miR-146b-5p|miR-148a-3p|miR-148b-3p|miR-149-5p|miR-152-3p|miR-182-3p|miR-19a-3p|miR-19b-3p|miR-208a-5p|miR-208b-5p|miR-214-3p|miR-30a-3p|miR-30d-3p|miR-30e-3p|miR-3120-3p|miR-3125|miR-3128|miR-3191-5p|miR-320e|miR-335-5p|miR-3619-5p|miR-3646|miR-3671|miR-3679-5p|miR-3685|miR-3912-5p|miR-3916|miR-4263|miR-42…		0.84	0.16	-0.84	0.69	0.51	0.56	0.56	0.76	2.52	0.25	2.25	1.14	2.47	11.27	11.6081	10.6152	11.4599	11.4503
OR7G2	olfactory receptor, family 7, subfamily G, member 2	protein coding	ENSG00000170923	390882	04740	GO:0005886			-0.98	-0.01	0.42	-0.97	0.6	0.65	0.65	0.88	2.52	0.01	0.72	1.48	1.6	2.64	2.67177	3.10072	2.12105	2.6834
A_22_P00012329		(NA)							-0.98	0.18	0.88	-1.16	0.59	0.64	0.64	0.87	2.52	0.26	2	1.91	1.86	2.31	2.23199	2.92913	1.95392	2.04773
Hs.677228		(NA)							-0.99	-0.15	0.78	-0.84	0.6	0.65	0.65	0.89	2.52	0.2	1.67	1.2	1.98	2.8	2.53846	3.47446	2.48444	2.69222
LOC644189	acyl-CoA thioesterase 4 pseudogene	pseudogene							-1.13	0.1	-0.34	-1.23	0.69	0.75	0.75	1.02	2.52	0.1	0.46	1.68	3.15	3.57	4.13079	3.69032	2.55677	4.03356
INPP5B	inositol polyphosphate-5-phosphatase, 75kDa	protein coding	ENSG00000204084	3633	00562|01100|04070	GO:0004439|GO:0005515|GO:0005737|GO:0005829|GO:0005886|GO:0007264|GO:0016020|GO:0043647|GO:0044281|GO:0046856|GO:0051056|GO:0052658	let-7f-2-3p|miR-1185-1-3p|miR-1185-2-3p|miR-1208|miR-1268a|miR-1268b|miR-1273h-5p|miR-1285-3p|miR-1297|miR-1303|miR-1827|miR-185-3p|miR-196a-3p|miR-22-3p|miR-223-3p|miR-24-3p|miR-27a-5p|miR-30b-3p|miR-3151-5p|miR-3160-3p|miR-3165|miR-3187-5p|miR-340-3p|miR-3612|miR-3622b-5p|miR-3689a-3p|miR-3689b-3p|miR-3689c|miR-371b-5p|miR-373-5p|miR-3934-3p|miR-4276|miR-4328|miR-4478|miR-4486|miR-4492|miR-4500…		-1.22	-0.7	-0.23	-0.52	0.75	0.81	0.81	1.1	2.52	1.08	0.26	0.48	2.28	4.11	4.04407	4.51443	3.28979	4.74741
EPHX3	epoxide hydrolase 3	protein coding	ENSG00000105131	79852			miR-1207-5p|miR-302c-5p|miR-3667-3p|miR-3667-5p|miR-4291|miR-4316|miR-4763-3p|miR-6811-3p|miR-6823-5p|miR-6867-5p|miR-6872-3p		0.74	-0.29	0.21	1.03	0.45	0.49	0.49	0.66	2.52	0.65	0.41	2.35	3.71	9.78	9.26438	9.76008	10.5021	9.55471
ENO3	enolase 3 (beta, muscle)	protein coding	ENSG00000108515	2027	00010|01100|01200|01230|03018|04066	GO:0005615|GO:0005737|GO:0005829|GO:0005886|GO:0005975|GO:0006006|GO:0006094|GO:0044281|GO:0061621|GO:0070062			-1.49	-0.62	1.64	-0.88	0.91	0.98	0.98	1.34	2.52	0.7	2.57	0.73	3.23	4.85	3.92158	6.1773	4.68263	4.54097
A_21_P0009783		(NA)							-0.93	0.58	0.84	-1.51	0.57	0.61	0.61	0.84	2.52	1.2	1.99	2.85	2.04	2.56	2.78843	3.05141	2.11742	2.20814
TMEM154	transmembrane protein 154	protein coding	ENSG00000170006	201799			miR-1182|miR-1200|miR-1267|miR-1269a|miR-1269b|miR-138-5p|miR-15a-5p|miR-15b-5p|miR-16-5p|miR-185-5p|miR-1910-3p|miR-195-5p|miR-215-3p|miR-219a-1-3p|miR-2909|miR-296-3p|miR-3150b-3p|miR-3163|miR-370-3p|miR-3921|miR-424-5p|miR-4251|miR-4296|miR-4306|miR-4318|miR-4324|miR-4436b-3p|miR-4469|miR-4477b|miR-4478|miR-4481|miR-4632-5p|miR-4644|miR-4653-5p|miR-4688|miR-4689|miR-4711-3p|miR-4732-3p|miR-473…		2.21	-0.06	-3.21	2.27	1.35	1.46	1.46	1.98	2.51	0.03	3.62	1.56	3.4	4.73	5.8065	2.6564	4.86408	5.86394
DERL2	derlin 2	protein coding	ENSG00000072849	51009	04141	GO:0005515|GO:0005783|GO:0005789|GO:0006457|GO:0008284|GO:0016020|GO:0018279|GO:0030176|GO:0030307|GO:0030433|GO:0030968|GO:0030970|GO:0043687|GO:0044267|GO:1904153	miR-106a-5p|miR-106b-5p|miR-146a-3p|miR-17-5p|miR-199a-5p|miR-199b-5p|miR-20a-5p|miR-20b-5p|miR-2355-3p|miR-302a-3p|miR-302b-3p|miR-302c-3p|miR-302d-3p|miR-302e|miR-3128|miR-372-3p|miR-373-3p|miR-378j|miR-3909|miR-3925-3p|miR-4328|miR-4470|miR-450b-5p|miR-4653-3p|miR-4727-5p|miR-516b-5p|miR-519d-3p|miR-520a-3p|miR-520b|miR-520c-3p|miR-520d-3p|miR-520e|miR-520f-3p|miR-526b-3p|miR-6740-3p|miR-6815-…		0.8	0.22	-0.13	0.58	0.49	0.53	0.53	0.72	2.51	0.42	0.21	0.96	1.76	9.82	9.83768	9.48579	10.2844	9.61441
FAM129A	family with sequence similarity 129, member A	protein coding	ENSG00000135842	116496		GO:0001933|GO:0001934|GO:0005515|GO:0005737|GO:0005886|GO:0016020|GO:0034976|GO:0045727|GO:0070062	let-7a-2-3p|let-7g-3p|miR-106a-5p|miR-106b-5p|miR-1236-3p|miR-1249-5p|miR-1273a|miR-128-3p|miR-1305|miR-149-3p|miR-17-5p|miR-199a-3p|miR-199b-3p|miR-20a-5p|miR-20b-5p|miR-216a-3p|miR-301a-5p|miR-301b-5p|miR-302f|miR-3074-5p|miR-3129-5p|miR-3134|miR-3138|miR-3152-5p|miR-3163|miR-329-5p|miR-3606-5p|miR-3611|miR-3613-3p|miR-3653-3p|miR-3660|miR-3662|miR-3671|miR-3681-3p|miR-371a-5p|miR-371b-5p|miR-3…		-1.09	-0.7	0.6	-0.39	0.67	0.72	0.72	0.98	2.51	1.26	1.01	0.38	2.44	9.64	9.09436	10.3965	9.30329	9.79881
Hs.578339		(NA)							1.01	-0.29	-0.49	1.3	0.62	0.67	0.67	0.91	2.51	0.43	0.87	2.11	1.76	2.47	2.24925	2.0469	3.05614	2.54056
TMEM179B	transmembrane protein 179B	protein coding	ENSG00000185475	374395			miR-1205|miR-150-3p|miR-3529-3p|miR-3680-5p|miR-377-3p|miR-4645-3p|miR-5095|miR-7151-3p	FBXW7|LASS2	0.84	-0.05	-1.15	0.89	0.51	0.56	0.56	0.76	2.5	0.07	3.36	1.61	3.08	7.3	7.65459	6.55329	7.39288	7.70218
LINC00930	lincRNA 930	lincRNA							-1.04	-0.43	1.66	-0.6	0.64	0.69	0.69	0.94	2.5	0.7	4.03	0.72	4.72	5.68	4.7524	6.84929	5.81343	5.18709
KRBA2	KRAB-A domain containing 2	protein coding	ENSG00000184619	124751			miR-222-5p|miR-30a-3p|miR-30d-3p|miR-30e-3p|miR-5002-3p|miR-619-5p|miR-6879-3p|miR-8055		-1.04	-0.15	1.91	-0.89	0.64	0.69	0.69	0.94	2.49	0.18	4.68	1.21	4.86	9.8	8.95483	11.0095	9.97319	9.10075
ENSG00000259213		asRNA	ENSG00000259213						1.31	-0.69	-0.78	2	0.8	0.87	0.87	1.18	2.49	0.95	1.12	2.61	1.99	5.88	5.43745	5.34759	6.65516	6.12578
PRSS12	protease, serine, 12 (neurotrypsin, motopsin)	protein coding	ENSG00000164099	8492		GO:0005886|GO:0006887|GO:0008236|GO:0030424	miR-1229-3p|miR-1261|miR-1265|miR-1288-5p|miR-18a-5p|miR-18b-5p|miR-197-5p|miR-20a-3p|miR-216b-3p|miR-224-5p|miR-3132|miR-3137|miR-3188|miR-34a-3p|miR-3617-5p|miR-3679-3p|miR-3927-3p|miR-4310|miR-432-5p|miR-4447|miR-449c-3p|miR-450b-5p|miR-4531|miR-4650-3p|miR-4650-5p|miR-4658|miR-4697-3p|miR-4720-5p|miR-4735-3p|miR-4799-3p|miR-5003-3p|miR-516b-5p|miR-539-5p|miR-548e-5p|miR-5588-5p|miR-561-3p|miR…		-1.83	-0.28	1.13	-1.55	1.12	1.21	1.21	1.66	2.49	0.2	1.19	1.19	1.71	6.84	6.51372	7.93145	6.10131	6.79681
A_21_P0012286		(NA)							1.05	-0.54	-0.67	1.59	0.65	0.7	0.7	0.95	2.49	0.92	1.24	2.59	1.93	3.53	3.21267	3.08044	4.13103	3.75539
OR4C15	olfactory receptor, family 4, subfamily C, member 15	protein coding	ENSG00000181939	81309	04740	GO:0005886			1.1	-0.44	-0.82	1.54	0.67	0.73	0.73	0.99	2.49	0.67	1.54	2.35	1.76	2.89	2.7091	2.32853	3.42593	3.1522
TBC1D12	TBC1 domain family, member 12	protein coding	ENSG00000108239	23232			let-7c-3p|miR-101-3p|miR-1257|miR-1277-5p|miR-1306-5p|miR-130a-5p|miR-145-5p|miR-1468-3p|miR-16-2-3p|miR-181a-2-3p|miR-182-5p|miR-190a-3p|miR-195-3p|miR-200b-3p|miR-200c-3p|miR-2114-5p|miR-221-3p|miR-222-3p|miR-223-3p|miR-23a-3p|miR-23b-3p|miR-23c|miR-3145-5p|miR-3157-5p|miR-3190-3p|miR-3606-3p|miR-3606-5p|miR-3661|miR-3663-5p|miR-3677-5p|miR-3690|miR-4253|miR-4261|miR-4276|miR-4282|miR-429|miR-4…	TAF13	-1.38	-0.25	0.12	-1.13	0.85	0.92	0.92	1.25	2.49	0.24	0.11	1.13	1.84	4.94	5.05815	5.43341	4.05475	5.30978
Hs.646543		(NA)							-1.37	-0.27	1.04	-1.1	0.84	0.91	0.91	1.24	2.49	0.27	1.55	1.1	1.96	4.1	3.71658	5.02464	3.65558	3.9894
A_24_P476086		(NA)							-1.11	-0.33	0.69	-0.79	0.68	0.74	0.74	1.01	2.49	0.44	1.19	0.93	1.88	3.48	3.1646	4.18401	3.07187	3.49078
BIRC3	baculoviral IAP repeat containing 3	protein coding	ENSG00000023445	330	04064|04120|04210|04510|04621|04668|05145|05200|05202|05222	GO:0002224|GO:0002756|GO:0004842|GO:0005515|GO:0005634|GO:0005654|GO:0005737|GO:0005829|GO:0007166|GO:0007249|GO:0010803|GO:0010939|GO:0012501|GO:0016567|GO:0031398|GO:0033209|GO:0034121|GO:0034138|GO:0034142|GO:0035666|GO:0038061|GO:0039535|GO:0042981|GO:0043066|GO:0043123|GO:0045087|GO:0045088|GO:0050727|GO:0060544|GO:0070266|GO:0070424|GO:0097300|GO:2000116	miR-1286|miR-143-3p|miR-1911-5p|miR-20b-3p|miR-24-1-5p|miR-24-2-5p|miR-28-3p|miR-3192-5p|miR-369-3p|miR-3908|miR-3976|miR-4275|miR-4297|miR-4477b|miR-4487|miR-4492|miR-4496|miR-4728-3p|miR-4747-5p|miR-4770|miR-487a-5p|miR-487b-5p|miR-513b-3p|miR-5196-5p|miR-556-3p|miR-561-3p|miR-561-5p|miR-577|miR-587|miR-6088|miR-616-3p|miR-649|miR-6507-5p|miR-651-3p|miR-651-5p|miR-657|miR-6809-3p|miR-6830-5p|mi…		-1.35	-1.11	-0.48	-0.24	0.83	0.9	0.9	1.22	2.49	1.73	0.56	0.17	2.6	3.39	3.18983	3.8174	2.46804	4.29553
KRTAP10-6	keratin associated protein 10-6	protein coding	ENSG00000188155	386674					1.4	0.77	-0.2	0.63	0.87	0.94	0.94	1.27	2.48	1	0.18	0.51	1.91	2.92	3.21355	2.24172	3.64544	2.44318
GCLM	glutamate-cysteine ligase, modifier subunit	protein coding	ENSG00000023909	2730	00270|00480|01100	GO:0000096|GO:0005829|GO:0006536|GO:0006750|GO:0006805|GO:0006979|GO:0034641|GO:0035226|GO:0042493|GO:0044281|GO:0050880|GO:1901687	miR-1182|miR-1197|miR-1252-5p|miR-1277-5p|miR-1279|miR-1281|miR-183-5p|miR-186-5p|miR-203a-5p|miR-205-3p|miR-300|miR-302f|miR-30a-3p|miR-30d-3p|miR-30e-3p|miR-3148|miR-323a-3p|miR-3612|miR-3653-3p|miR-3667-3p|miR-3689d|miR-374a-5p|miR-374b-3p|miR-374b-5p|miR-381-3p|miR-3924|miR-4258|miR-432-3p|miR-4328|miR-4428|miR-4443|miR-4446-5p|miR-4477b|miR-4534|miR-4680-3p|miR-4714-5p|miR-4768-5p|miR-4775|m…		-0.86	-0.01	1.69	-0.85	0.53	0.57	0.57	0.78	2.47	0.01	4.99	1.46	4.98	10.31	9.63503	11.3275	10.47	9.6413
LZTS1	leucine zipper, putative tumor suppressor 1	protein coding	ENSG00000061337	11178		GO:0003700|GO:0005515|GO:0006355|GO:0016242	miR-1205|miR-1226-5p|miR-1227-5p|miR-1249-5p|miR-1302|miR-1321|miR-1343-5p|miR-135a-5p|miR-135b-5p|miR-1587|miR-1827|miR-185-3p|miR-18a-3p|miR-1910-3p|miR-1915-3p|miR-196a-3p|miR-1976|miR-214-3p|miR-2467-3p|miR-3064-3p|miR-3121-3p|miR-3126-3p|miR-3148|miR-3153|miR-3163|miR-3194-5p|miR-3197|miR-3202|miR-326|miR-328-5p|miR-330-5p|miR-331-3p|miR-339-5p|miR-342-5p|miR-345-3p|miR-3613-3p|miR-3619-5p|m…	ADARB1|BRD4|DDX51|GPR144|HOXB8|LBX1|MBD6|NARG1|NKX6-1|PAX5|PDLIM4|PDX1|PRH1|PWWP2B|REXO1|RGS6|SCT|TRIM5|TTC28|ZCCHC14|ZNF552|ZNF554|ZNF771	1.6	-0.63	1.68	2.23	0.99	1.07	1.07	1.46	2.47	0.64	2.39	2.31	5.94	4.75	2.96247	5.27655	6.87533	3.59478
ANKRD2	ankyrin repeat domain 2 (stretch responsive muscle)	protein coding	ENSG00000165887	26287		GO:0000122|GO:0000791|GO:0005634|GO:0005829|GO:0043231|GO:0043422|GO:0043619|GO:0045662|GO:0061629			1.69	0	-3.06	1.69	1.05	1.13	1.13	1.55	2.47	0	4.55	1.47	4.46	4.81	5.98786	2.92574	4.62043	5.98442
ULK4	unc-51 like kinase 4	protein coding	ENSG00000168038	54986		GO:0000226|GO:0010975|GO:0043408|GO:0046328|GO:0090036|GO:1900744|GO:2001222	miR-1227-5p|miR-3688-5p|miR-4492|miR-556-3p|miR-6734-5p|miR-6762-5p|miR-6845-5p		1.31	0.64	0.06	0.67	0.81	0.88	0.88	1.19	2.47	0.85	0.05	0.59	1.99	4.1	4.18971	3.60293	4.91333	3.5465
A_22_P00018938		(NA)							1.16	-0.37	-1.4	1.53	0.71	0.87	0.87	1.13	2.47	0.42	2.44	1.96	2.04	3.71	3.91438	2.88219	4.0398	4.28626
SCUBE1	signal peptide, CUB domain, EGF-like 1	protein coding	ENSG00000159307	80274		GO:0005509|GO:0005615|GO:0009897|GO:0009986|GO:0019897|GO:0042802|GO:0046982|GO:0051260	miR-1227-5p|miR-1252-5p|miR-1267|miR-1273h-5p|miR-1321|miR-1827|miR-190a-3p|miR-1910-3p|miR-2355-5p|miR-2467-3p|miR-28-5p|miR-30b-3p|miR-3121-3p|miR-3139|miR-3156-3p|miR-3192-5p|miR-3202|miR-3652|miR-3689a-3p|miR-3689b-3p|miR-3689c|miR-378g|miR-3929|miR-3934-3p|miR-4270|miR-4279|miR-4318|miR-4419a|miR-4419b|miR-4430|miR-4441|miR-4443|miR-4478|miR-4492|miR-4645-5p|miR-4652-3p|miR-4660|miR-4673|miR…	ADARB1|ELAVL3|EPAS1|EVX1|HOXB8|KIAA0892|LBX1|LGR4|MBD6|MYST3|NARG1|PWWP2B|SCT|TTC28|ZNF264|ZNF423|ZNF771	1.22	0.57	-0.27	0.65	0.76	0.82	0.82	1.12	2.47	0.8	0.3	0.63	1.8	3.1	3.33752	2.50214	3.72466	2.7684
A_21_P0011569		(NA)							-0.89	-0.57	0.03	-0.32	0.55	0.59	0.59	0.81	2.47	1.23	0.04	0.38	2.03	2.57	2.37032	2.96613	2.08111	2.93648
Hs.357234		(NA)							1.03	-0.03	-0.25	1.05	0.63	0.69	0.69	0.93	2.47	0.03	0.34	1.53	1.75	2.54	2.37651	2.15774	3.18458	2.40385
A_21_P0006474		(NA)							-1.24	0.6	1.57	-1.84	0.77	0.83	0.83	1.13	2.47	0.84	3.01	2.5	2.35	2.63	2.56201	3.52643	2.28514	1.96025
A_33_P3250974		(NA)							0.74	-0.16	-0.2	0.9	0.46	0.5	0.5	0.68	2.47	0.3	0.39	1.92	1.92	2.3	2.09472	2.05636	2.80078	2.25438
A_24_P409661		(NA)							0.97	0.22	-0.39	0.74	0.6	0.65	0.65	0.88	2.46	0.32	0.66	1.03	1.61	9.58	9.69221	9.07855	10.0442	9.46883
RNF141	ring finger protein 141	protein coding	ENSG00000110315	50862		GO:0004842|GO:0051865	miR-126-5p|miR-1279|miR-1296-3p|miR-1297|miR-142-5p|miR-187-5p|miR-190a-3p|miR-203a-3p|miR-2054|miR-2110|miR-2117|miR-25-3p|miR-26a-5p|miR-26b-5p|miR-3064-3p|miR-3156-3p|miR-3163|miR-3173-5p|miR-3180-5p|miR-32-3p|miR-32-5p|miR-335-5p|miR-3617-5p|miR-363-3p|miR-367-3p|miR-371a-5p|miR-374a-5p|miR-374b-5p|miR-383-5p|miR-3924|miR-3942-5p|miR-3978|miR-4282|miR-4301|miR-4317|miR-4465|miR-4481|miR-4487|…	ZNF219	-0.83	-0.73	-0.91	-0.11	0.52	0.56	0.56	0.76	2.46	1.86	2.49	0.11	4.26	7.21	7.37895	7.19813	6.36368	8.1067
A_21_P0001491		(NA)							0.97	-0.66	-0.81	1.62	0.6	0.65	0.65	0.88	2.46	1.33	1.76	2.91	2.06	2.55	2.23766	2.08592	3.05223	2.89634
LRRK1	leucine-rich repeat kinase 1	protein coding	ENSG00000154237	79705		GO:0005515|GO:0005737|GO:0005739|GO:0042802|GO:0090263	miR-1178-5p|miR-1207-3p|miR-1225-3p|miR-1275|miR-146a-5p|miR-146b-5p|miR-15a-5p|miR-15b-5p|miR-16-5p|miR-1908-5p|miR-195-5p|miR-29b-1-5p|miR-3191-5p|miR-33a-3p|miR-3609|miR-370-3p|miR-424-5p|miR-4267|miR-4291|miR-4292|miR-4293|miR-4323|miR-4524a-5p|miR-4524b-5p|miR-4531|miR-4665-5p|miR-4666b|miR-4675|miR-4741|miR-4749-5p|miR-4757-5p|miR-4775|miR-495-3p|miR-497-5p|miR-548ah-5p|miR-5586-5p|miR-5688…		1.04	-0.13	-0.85	1.17	0.65	0.7	0.7	0.95	2.46	0.15	1.71	1.72	1.72	5.74	5.82129	5.09181	6.13526	5.94649
Hs.677407		(NA)							-1.23	-0.26	0.65	-0.97	0.77	0.83	0.83	1.13	2.46	0.29	0.93	1.07	1.65	3.28	3.07132	3.97783	2.74334	3.33186
GFY	golgi-associated, olfactory signaling regulator	protein coding	ENSG00000261949	100507003		GO:0007608|GO:0030173			0.99	-0.2	-0.76	1.19	0.62	0.66	0.66	0.91	2.46	0.27	1.56	1.88	1.65	3.18	3.17957	2.61669	3.60718	3.37566
A_33_P3340114		(NA)							-0.96	-0.21	0.49	-0.75	0.59	0.64	0.64	0.87	2.46	0.3	0.9	1.05	1.64	2.36	2.20218	2.89735	1.94226	2.40935
INPP4B	inositol polyphosphate-4-phosphatase, type II, 105kDa	protein coding	ENSG00000109452	8821	00562|01100|04070	GO:0005515|GO:0005829|GO:0006644|GO:0006661|GO:0007165|GO:0036092|GO:0043647|GO:0044281	miR-101-3p|miR-1236-3p|miR-1272|miR-148b-5p|miR-2052|miR-3613-3p|miR-382-5p|miR-4261|miR-4262|miR-4482-3p|miR-4719|miR-4728-3p|miR-4775|miR-495-3p|miR-5187-3p|miR-5688|miR-5694|miR-590-3p|miR-618|miR-6501-3p|miR-6516-3p|miR-6874-3p|miR-6885-3p|miR-8075	GRSF1|KLHL24|UACA|ZNF160|ZNF354A	-1.54	0.8	0.76	-2.34	0.95	1.03	1.03	1.4	2.46	0.93	0.86	2.57	2.07	5.42	6.01112	5.96989	4.43341	5.20915
LINC-PINT	lincRNA, p53 induced transcript	asRNA	ENSG00000231721	378805					-1.91	-0.53	2.55	-1.38	1.19	1.28	1.28	1.75	2.45	0.4	3.2	0.94	3.53	4.85	3.61935	6.6928	4.78578	4.14441
STARD7-AS1	STARD7 antisense RNA 1	asRNA							1.15	0.18	-0.69	0.97	0.72	0.77	0.77	1.05	2.45	0.2	1.12	1.16	1.65	3.58	3.77628	2.90325	4.05227	3.59633
FCRLA	Fc receptor-like A	protein coding	ENSG00000132185	84824		GO:0005737	miR-1286|miR-1293|miR-1302|miR-3123|miR-3154|miR-328-5p|miR-3652|miR-4298|miR-4430|miR-4443|miR-4450|miR-4463|miR-4483|miR-4640-5p|miR-4651|miR-4726-5p|miR-485-5p|miR-5571-5p|miR-597-3p|miR-6077|miR-608|miR-6734-5p|miR-6737-5p|miR-6812-5p|miR-6819-5p|miR-6884-5p|miR-6885-5p|miR-876-3p		1.56	0.31	0.17	1.25	0.97	1.05	1.05	1.43	2.45	0.27	0.13	1.09	2.15	3.48	3.19761	3.05537	4.61228	2.88943
A_21_P0005568		(NA)							-1.9	-0.46	2.33	-1.43	1.18	1.27	1.27	1.74	2.45	0.34	2.89	1	3.15	3.47	2.3951	5.18884	3.29233	2.85748
SAR1A	secretion associated, Ras related GTPase 1A	protein coding	ENSG00000079332	56681	04141|05134	GO:0070062	miR-1202|miR-1206|miR-1255b-2-3p|miR-1276|miR-128-3p|miR-1285-3p|miR-140-3p|miR-141-3p|miR-18a-3p|miR-18a-5p|miR-18b-5p|miR-197-3p|miR-197-5p|miR-198|miR-200a-3p|miR-20a-3p|miR-21-3p|miR-2114-3p|miR-2117|miR-214-3p|miR-216a-3p|miR-221-5p|miR-224-5p|miR-2682-5p|miR-3132|miR-3148|miR-3151-3p|miR-3176|miR-3187-5p|miR-34a-5p|miR-34b-5p|miR-34c-5p|miR-3591-3p|miR-3606-3p|miR-3619-5p|miR-3681-3p|miR-37…	G3BP1|RCOR3|STIP1|ZNF207	0.84	0.3	-0.78	0.54	0.53	0.57	0.57	0.77	2.44	0.55	1.99	0.8	2.53	12.03	12.437	11.3595	12.2004	12.1376
A_33_P3418790		(NA)							0.92	-0.53	-0.51	1.45	0.57	0.62	0.62	0.84	2.44	1.06	0.99	2.68	2.08	2.37	2.00464	2.03139	2.94717	2.53713
CORO2A	coronin, actin binding protein, 2A	protein coding	ENSG00000106789	7464		GO:0017053|GO:0035556	miR-1224-3p|miR-1225-3p|miR-1231|miR-125a-5p|miR-125b-5p|miR-1273h-5p|miR-1275|miR-1276|miR-130b-5p|miR-134-5p|miR-140-5p|miR-143-5p|miR-149-3p|miR-1587|miR-1914-5p|miR-1976|miR-199a-5p|miR-199b-5p|miR-2355-5p|miR-30b-3p|miR-3118|miR-3120-5p|miR-3158-5p|miR-3163|miR-3190-5p|miR-3620-5p|miR-3649|miR-3657|miR-3689a-3p|miR-3689b-3p|miR-3689c|miR-374c-5p|miR-384|miR-3921|miR-421|miR-4251|miR-4267|miR…		1.63	0.3	-1.12	1.33	1.02	1.1	1.1	1.5	2.44	0.24	1.34	1.11	1.77	3.95	4.32957	2.9077	4.53652	4.03261
LINC00593	lincRNA 593	lincRNA							-1.34	-0.37	1.78	-0.98	0.84	0.91	0.91	1.23	2.44	0.39	3.16	0.95	3.48	3.67	2.8099	4.95842	3.61588	3.17559
CLPTM1	cleft lip and palate associated transmembrane protein 1	protein coding	ENSG00000104853	1209		GO:0005515|GO:0005887|GO:0009897|GO:0016020|GO:0033081	miR-1207-5p|miR-3126-5p|miR-3960|miR-412-3p|miR-4441|miR-4473|miR-4492|miR-4494|miR-4498|miR-4649-5p|miR-4707-5p|miR-4763-3p|miR-5001-5p|miR-512-3p|miR-665|miR-6729-5p|miR-6754-3p|miR-6875-5p|miR-762|miR-7845-5p|miR-8077|miR-8078|miR-892a	ERF|HGS|PEA15|SAMD4B|SREBF2	0.77	-0.24	-0.14	1.02	0.48	0.52	0.52	0.71	2.44	0.47	0.25	2.11	2.2	7.66	7.35225	7.45299	8.22566	7.59715
Hs.655466		(NA)							-1.41	-0.7	1.38	-0.71	0.88	0.95	0.95	1.29	2.44	0.86	2.15	0.58	2.98	3	2.13224	4.20441	2.79889	2.82873
PCED1B-AS1	PCED1B antisense RNA 1	other ncRNA	ENSG00000247774	100233209					-0.88	0.25	1.54	-1.13	0.55	0.59	0.59	0.81	2.44	0.41	4.39	2.04	3.83	6.19	5.7844	7.07853	6.20241	5.53454
UNC5CL	unc-5 homolog C (C. elegans)-like	protein coding	ENSG00000124602	222643		GO:0006508|GO:0008233|GO:0016020|GO:0043123|GO:0046330	miR-1270|miR-1910-3p|miR-1976|miR-302e|miR-3180-5p|miR-3919|miR-4311|miR-4314|miR-4419a|miR-4492|miR-4514|miR-4640-5p|miR-4692|miR-4709-5p|miR-4726-5p|miR-4762-3p|miR-4763-5p|miR-5584-5p|miR-6071|miR-620|miR-6511a-5p|miR-6881-3p|miR-744-3p|miR-7515		-1.23	0.17	0.78	-1.4	0.77	0.83	0.83	1.13	2.44	0.17	1.19	1.73	1.55	2.98	3.01707	3.62549	2.39411	2.85011
A_33_P3384442		(NA)							-0.83	-0.07	1.92	-0.76	0.52	0.56	0.56	0.77	2.43	0.1	5.78	1.28	6.03	13.61	12.7535	14.7455	13.9136	12.8271
PABPC1L2B-AS1	PABPC1L2B antisense RNA 1 (head to head)	asRNA	ENSG00000226725	101928345					1.08	-1.11	-1.31	2.19	0.67	0.73	0.73	0.99	2.43	2.3	2.83	3.63	2.63	3.4	2.98993	2.79543	3.87124	4.10463
BAIAP2L2	BAI1-associated protein 2-like 2	protein coding	ENSG00000128298	80115		GO:0005543|GO:0012506|GO:0044291|GO:0061024	let-7a-2-3p|let-7g-3p|miR-3147|miR-3153|miR-331-3p|miR-4292|miR-4441|miR-4485-5p|miR-4716-3p|miR-625-5p|miR-6791-5p|miR-6794-5p|miR-6805-5p		2.03	-0.49	-3.01	2.52	1.27	1.38	1.38	1.87	2.43	0.33	3.59	1.94	3.05	7.81	8.51246	5.98933	8.0236	9.0015
NFXL1	nuclear transcription factor, X-box binding-like 1	protein coding	ENSG00000170448	152518		GO:0016020	miR-103a-2-5p|miR-126-5p|miR-1323|miR-143-3p|miR-146b-3p|miR-183-3p|miR-18a-3p|miR-190a-3p|miR-24-3p|miR-3123|miR-3200-5p|miR-3646|miR-4282|miR-4418|miR-4428|miR-4680-3p|miR-4682|miR-4756-3p|miR-4770|miR-4795-3p|miR-488-3p|miR-509-3-5p|miR-509-5p|miR-548at-5p|miR-548av-5p|miR-548k|miR-548n|miR-548o-3p|miR-548p|miR-561-3p|miR-5692b|miR-5692c|miR-570-3p|miR-590-3p|miR-6088|miR-653-5p|miR-6779-3p|mi…		-0.93	-0.22	0.19	-0.71	0.58	0.63	0.63	0.86	2.43	0.32	0.26	1.01	1.65	5.73	5.72337	6.12588	5.1948	5.94079
RPL23AP32	ribosomal protein L23a pseudogene 32	pseudogene							-1.42	-0.39	3.23	-1.02	0.89	0.96	0.96	1.31	2.43	0.4	5.7	0.93	6.27	5.14	3.5	7.12606	5.70966	3.89462
A_21_P0002969		(NA)							-0.92	0.32	1.05	-1.25	0.58	0.62	0.62	0.85	2.43	0.54	2.6	2.18	2.1	2.57	2.49909	3.22308	2.30089	2.17432
Hs.170838		(NA)							-0.86	-0.32	0.55	-0.54	0.54	0.58	0.58	0.79	2.43	0.59	1.22	0.77	1.98	2.75	2.4494	3.32411	2.46449	2.77043
LINC01339	long intergenic non-protein coding RNA 1339	other ncRNA	ENSG00000248555						-1.01	-0.27	0.88	-0.74	0.63	0.69	0.69	0.93	2.43	0.39	1.83	0.95	2.24	2.7	2.2937	3.45056	2.43794	2.56817
A_21_P0009438		(NA)							0.98	0	-0.69	0.98	0.61	0.66	0.66	0.9	2.43	0	1.38	1.46	1.62	2.61	2.72057	2.03279	3.00925	2.72405
A_21_P0002113		(NA)							-0.99	0.18	0.94	-1.16	0.62	0.67	0.67	0.91	2.43	0.23	2.06	1.81	1.85	2.56	2.44932	3.21192	2.22634	2.27382
A_33_P3405864		(NA)							0.9	-0.02	-0.21	0.92	0.57	0.61	0.61	0.83	2.43	0.02	0.32	1.49	1.71	2.37	2.22551	2.03221	2.93568	2.24308
LOC102724491	uncharacterized LOC102724491	other ncRNA							-0.93	-0.07	1.77	-0.86	0.58	0.63	0.63	0.86	2.42	0.09	4.74	1.3	4.82	10.2	9.45409	11.2893	10.3622	9.52396
MEG3	maternally expressed 3 (non-protein coding)	lncRNA							-1.66	-0.52	1.92	-1.14	1.05	1.13	1.13	1.54	2.42	0.46	2.64	0.87	3.03	5.8	4.83624	7.27622	5.61478	5.3558
A_21_P0011326		(NA)							0.95	-0.03	-0.53	0.98	0.6	0.65	0.65	0.88	2.42	0.04	1	1.51	1.51	4.56	4.56795	4.06596	5.0157	4.59883
SNIP1	Smad nuclear interacting protein 1	protein coding	ENSG00000163877	79753		GO:0005515|GO:0005654|GO:0005737|GO:0035196|GO:0044822|GO:1903955	let-7c-3p|miR-105-5p|miR-1197|miR-1227-3p|miR-1273h-3p|miR-1273h-5p|miR-130a-3p|miR-130b-3p|miR-1323|miR-141-3p|miR-19a-3p|miR-19b-3p|miR-200a-3p|miR-2682-5p|miR-301a-3p|miR-301b-3p|miR-3065-3p|miR-30b-3p|miR-3125|miR-3182|miR-3189-3p|miR-3201|miR-335-5p|miR-33a-3p|miR-34b-5p|miR-3613-3p|miR-3646|miR-3663-3p|miR-3666|miR-3689a-3p|miR-3689b-3p|miR-3689c|miR-3714|miR-371b-5p|miR-373-5p|miR-377-5p|m…	DRAP1|ZBTB20	0.88	0.33	-0.16	0.56	0.55	0.6	0.6	0.81	2.42	0.57	0.24	0.77	1.69	4.56	4.6451	4.15936	5.03969	4.32003
ZBTB25	zinc finger and BTB domain containing 25	protein coding	ENSG00000089775	7597		GO:0003677|GO:0003700|GO:0005515|GO:0005654|GO:0005737	miR-183-3p|miR-4689|miR-5692a|miR-6858-5p|miR-766-5p		-1.38	0.17	0.66	-1.55	0.87	0.94	0.94	1.27	2.42	0.15	0.81	1.69	1.54	3.72	3.85751	4.34876	2.97205	3.68843
Hs.611431		(NA)							-1.12	0.23	1.94	-1.35	0.7	0.76	0.76	1.03	2.42	0.28	4.3	1.87	3.84	3.32	2.75589	4.46098	3.34381	2.5211
CTB-178M22.2	uncharacterized LOC101927862	asRNA	ENSG00000253978	101927862					-0.75	0.24	0.71	-0.99	0.47	0.51	0.51	0.69	2.42	0.47	2.03	2.09	1.79	2.37	2.36706	2.83989	2.08952	2.13025
A_33_P3408529		(NA)							-0.78	0.1	0.5	-0.88	0.49	0.53	0.53	0.72	2.42	0.16	1.19	1.7	1.53	3.01	3.03131	3.42671	2.64642	2.93097
CXCL14	chemokine (C-X-C motif) ligand 14	protein coding	ENSG00000145824	9547	04060|04062	GO:0005515|GO:0005794|GO:0006935|GO:0007165|GO:0007267|GO:0060326	miR-1277-5p|miR-1288-3p|miR-147a|miR-150-5p|miR-302a-3p|miR-302b-3p|miR-302c-3p|miR-302c-5p|miR-302d-3p|miR-302e|miR-3119|miR-3121-5p|miR-3137|miR-3143|miR-3163|miR-328-5p|miR-329-5p|miR-338-5p|miR-340-5p|miR-3671|miR-372-3p|miR-373-3p|miR-421|miR-4326|miR-4330|miR-4425|miR-4455|miR-4477b|miR-4495|miR-4652-3p|miR-4677-3p|miR-4710|miR-4713-5p|miR-4719|miR-4755-5p|miR-4773|miR-486-3p|miR-5006-3p|mi…		0.89	0.62	0.21	0.27	0.56	0.61	0.61	0.82	2.42	1.33	0.33	0.31	2.28	2.48	2.5832	2.1812	3.07234	1.96644
A_21_P0002730		(NA)							-0.82	-0.46	0.01	-0.36	0.52	0.56	0.56	0.76	2.42	1.01	0.01	0.48	1.93	2.37	2.24657	2.71309	1.89167	2.70777
ELOVL6	ELOVL fatty acid elongase 6	protein coding	ENSG00000170522	79071	00062|01040|01212	GO:0005515|GO:0005783|GO:0005789|GO:0019367|GO:0019432|GO:0035338|GO:0042759|GO:0044255|GO:0044281	miR-103a-2-5p|miR-105-5p|miR-1178-3p|miR-1229-3p|miR-1250-3p|miR-125a-5p|miR-125b-5p|miR-128-3p|miR-1285-5p|miR-1303|miR-130a-5p|miR-1343-5p|miR-135a-5p|miR-135b-5p|miR-145-3p|miR-186-5p|miR-188-5p|miR-193b-5p|miR-196b-3p|miR-204-5p|miR-211-5p|miR-216a-3p|miR-219a-1-3p|miR-22-3p|miR-23a-3p|miR-23b-3p|miR-23c|miR-301a-5p|miR-301b-5p|miR-302c-5p|miR-302f|miR-3130-3p|miR-3169|miR-3182|miR-3184-5p|mi…	ANLN|ATAD2|BUB3|CCNA2|CCNB1|CDC6|CFLAR|DTL|ECT2|HELLS|KPNA2|MCM4|PDCD11|RFC5|UHRF1	0.98	0.33	-0.87	0.64	0.62	0.67	0.67	0.91	2.41	0.52	1.87	0.81	2.39	7.02	7.46784	6.26388	7.23914	7.13306
BRAP	BRCA1 associated protein	protein coding	ENSG00000089234	8315	04014	GO:0000151|GO:0000165|GO:0000186|GO:0004842|GO:0005515|GO:0005737|GO:0005829|GO:0007173|GO:0007264|GO:0007265|GO:0007411|GO:0008139|GO:0008286|GO:0008543|GO:0009968|GO:0016567|GO:0031965|GO:0038095|GO:0042802|GO:0045087|GO:0048010|GO:0048011|GO:0061630	miR-1227-5p|miR-1266-5p|miR-181a-5p|miR-181b-5p|miR-181c-5p|miR-181d-5p|miR-188-3p|miR-18a-3p|miR-196a-5p|miR-196b-5p|miR-216b-5p|miR-218-1-3p|miR-224-3p|miR-2276-3p|miR-30a-5p|miR-30b-5p|miR-30c-5p|miR-30d-5p|miR-30e-5p|miR-3115|miR-3120-5p|miR-3121-3p|miR-3123|miR-3182|miR-3675-3p|miR-3682-3p|miR-3921|miR-3926|miR-4262|miR-4283|miR-4311|miR-4314|miR-4418|miR-4441|miR-4476|miR-450a-1-3p|miR-4518…	NARG1|RBM34|RNF6|RPAP3|TOX4|ZCCHC10	0.93	0.05	-1.24	0.88	0.58	0.63	0.63	0.86	2.41	0.06	3.16	1.34	3.05	5.22	5.67174	4.38473	5.31072	5.62466
LOC283335	uncharacterized LOC283335	asRNA	ENSG00000257337	283335					1.53	-0.41	-1.62	1.94	0.97	1.05	1.05	1.42	2.41	0.38	2.33	1.98	1.96	5.12	5.26853	4.06075	5.59425	5.67736
SELPLG	selectin P ligand	protein coding	ENSG00000110876	6404	04514|05150	GO:0001931|GO:0005515|GO:0005886|GO:0005887|GO:0007155|GO:0007596|GO:0016020|GO:0016021|GO:0050900|GO:0050902|GO:0071354	miR-1225-5p|miR-1275|miR-186-3p|miR-302b-5p|miR-302d-5p|miR-3189-3p|miR-328-5p|miR-4293|miR-4296|miR-4306|miR-4459|miR-4497|miR-4535|miR-4802-5p|miR-6814-5p|miR-6861-5p|miR-6873-5p|miR-6879-3p|miR-6884-3p|miR-6894-5p|miR-7106-5p|miR-766-5p|miR-92a-2-5p	APBB1IP|BATF|CENTB1|IKZF1|LCP2|LYL1|PLEK	-0.93	-0.51	0.41	-0.41	0.58	0.63	0.63	0.86	2.41	0.98	0.72	0.49	1.99	3.68	3.33044	4.24995	3.32447	3.8433
SMIM8	small integral membrane protein 8	protein coding	ENSG00000111850	57150			let-7f-2-3p|miR-1185-1-3p|miR-1185-2-3p|miR-1267|miR-1306-5p|miR-199a-3p|miR-199b-3p|miR-302c-5p|miR-3121-5p|miR-3129-5p|miR-3143|miR-3148|miR-326|miR-330-5p|miR-3607-3p|miR-3664-5p|miR-4257|miR-4260|miR-4283|miR-4286|miR-4426|miR-4441|miR-4531|miR-4650-5p|miR-4795-3p|miR-4803|miR-488-3p|miR-5008-5p|miR-500a-5p|miR-545-5p|miR-548ae-3p|miR-548ah-3p|miR-548aj-3p|miR-548am-3p|miR-548aq-3p|miR-548j-3…		-1.14	-0.4	0.46	-0.74	0.72	0.78	0.78	1.06	2.41	0.53	0.64	0.81	1.66	3.07	2.83541	3.68819	2.54896	3.23134
A_22_P00023149		(NA)							-0.92	0.56	0.57	-1.48	0.58	0.62	0.62	0.85	2.41	1.13	1.15	2.72	2.03	2.41	2.75833	2.76557	1.84976	2.19455
SCN4B	sodium channel, voltage gated, type IV beta subunit	protein coding	ENSG00000177098	6330	04261	GO:0001518|GO:0005248|GO:0006814|GO:0010765|GO:0014704|GO:0017080|GO:0031226|GO:0035725|GO:0044325|GO:0060048|GO:0060307|GO:0086002|GO:0086006|GO:0086012|GO:0086016|GO:0086091|GO:2000649	let-7a-5p|let-7b-5p|let-7c-5p|let-7d-5p|let-7e-5p|let-7f-5p|let-7g-5p|let-7i-5p|miR-1179|miR-1199-5p|miR-1207-5p|miR-1224-3p|miR-1225-3p|miR-1233-5p|miR-124-3p|miR-1253|miR-125a-5p|miR-125b-5p|miR-1273h-5p|miR-1275|miR-1287-3p|miR-1291|miR-1294|miR-1302|miR-1306-5p|miR-1343-5p|miR-143-3p|miR-146a-3p|miR-149-3p|miR-1909-3p|miR-1910-3p|miR-1910-5p|miR-1972|miR-204-3p|miR-2110|miR-28-5p|miR-30b-3p|m…	FHL1|LONRF2|NFIA|WDR68|ZNF423	-0.94	0.55	0.45	-1.49	0.59	0.64	0.64	0.87	2.41	1.06	0.81	2.65	2.15	3.57	3.97992	3.8806	2.94004	3.42935
UNC5D	unc-5 homolog D (C. elegans)	protein coding	ENSG00000156687	137970	04360	GO:0007411|GO:0098609	miR-10a-5p|miR-10b-3p|miR-10b-5p|miR-1200|miR-1224-5p|miR-1233-5p|miR-1236-3p|miR-1238-5p|miR-1250-3p|miR-1256|miR-1270|miR-1273h-3p|miR-128-3p|miR-1283|miR-1285-5p|miR-129-5p|miR-1290|miR-1304-3p|miR-1304-5p|miR-130b-5p|miR-1322|miR-134-5p|miR-138-5p|miR-141-5p|miR-146a-5p|miR-146b-5p|miR-153-5p|miR-15a-5p|miR-15b-5p|miR-16-5p|miR-17-3p|miR-181a-5p|miR-181b-2-3p|miR-181b-3p|miR-181b-5p|miR-181c-…		-0.91	-0.25	0.45	-0.66	0.57	0.62	0.62	0.85	2.41	0.39	0.84	0.93	1.64	2.4	2.22178	2.92056	2.01038	2.47056
CECR2	cat eye syndrome chromosome region, candidate 2	protein coding	ENSG00000099954	27443		GO:0005515|GO:0005634|GO:0006309|GO:0043044|GO:0090537|GO:0097194			-1.03	0.79	2.2	-1.82	0.65	0.7	0.7	0.95	2.41	1.55	5.33	3.05	4.38	4.1	3.78291	5.1886	4.16121	2.98793
A_33_P3385441		(NA)							-0.93	0.06	1.01	-0.99	0.59	0.63	0.63	0.86	2.41	0.07	2.44	1.56	2.21	2.34	2.09184	3.04988	2.11847	2.03572
CTHRC1	collagen triple helix repeat containing 1	protein coding	ENSG00000164932	115908		GO:0005615	let-7c-3p|miR-155-5p|miR-208a-5p|miR-208b-5p|miR-216b-3p|miR-302c-5p|miR-30a-5p|miR-30b-5p|miR-30c-5p|miR-30d-5p|miR-30e-5p|miR-3123|miR-3146|miR-335-3p|miR-3607-3p|miR-3646|miR-3662|miR-3686|miR-3942-3p|miR-4500|miR-513b-3p|miR-520d-5p|miR-524-5p|miR-5696|miR-6753-3p|miR-7107-3p|miR-892c-5p|miR-9-5p	COL5A1	1.31	-0.35	-0.57	1.67	0.83	0.9	0.9	1.22	2.4	0.38	0.7	1.98	1.69	9.59	9.28247	9.07072	10.3822	9.63661
A_22_P00005316		(NA)							1.2	0.3	-0.84	0.9	0.76	0.82	0.82	1.12	2.4	0.35	1.34	0.97	1.84	4.07	4.41915	3.27846	4.47978	4.11901
LOC100289495	uncharacterized LOC100289495	lncRNA							-1.13	-0.09	-0.73	-1.04	0.72	0.77	0.77	1.05	2.4	0.09	1.21	1.29	3.74	3.52	4.1514	3.50511	2.37233	4.23941
A_33_P3407592		(NA)							1.33	-0.2	0.2	1.53	0.84	0.91	0.91	1.24	2.4	0.19	0.19	1.74	2.68	3.38	2.7654	3.17085	4.49684	2.96908
SLC25A45	solute carrier family 25, member 45	protein coding	ENSG00000162241	283130			miR-1207-5p|miR-1233-5p|miR-1273e|miR-1273h-5p|miR-1275|miR-204-3p|miR-2861|miR-302e|miR-3064-5p|miR-30b-3p|miR-3150b-3p|miR-32-3p|miR-3612|miR-3613-3p|miR-3689a-3p|miR-3689b-3p|miR-3689c|miR-371b-5p|miR-373-5p|miR-4252|miR-4270|miR-4441|miR-4448|miR-4455|miR-4522|miR-4533|miR-4755-3p|miR-4784|miR-491-5p|miR-5589-5p|miR-566|miR-605-3p|miR-6089|miR-616-5p|miR-637|miR-650|miR-6742-3p|miR-6754-5p|mi…		1.18	0.13	-0.7	1.06	0.75	0.81	0.81	1.1	2.4	0.13	1.08	1.23	1.56	3.24	3.39036	2.56179	3.74301	3.26478
A_21_P0009386		(NA)							-1.17	0.05	1.92	-1.22	0.74	0.8	0.8	1.09	2.4	0.05	4	1.52	3.78	3.22	2.54608	4.41806	3.2472	2.49571
A_22_P00021629		(NA)							0.91	0.02	-0.37	0.89	0.57	0.62	0.62	0.85	2.4	0.03	0.66	1.38	1.51	2.74	2.71153	2.31293	3.22227	2.68755
SRPRB	signal recognition particle receptor, B subunit	protein coding	ENSG00000144867	58477	03060	GO:0005737|GO:0005789|GO:0005881|GO:0006412|GO:0006614|GO:0010467|GO:0016020|GO:0030968|GO:0036498|GO:0044267	miR-1287-3p|miR-15a-5p|miR-15b-5p|miR-16-5p|miR-195-5p|miR-302e|miR-31-5p|miR-3140-3p|miR-3152-5p|miR-3180-5p|miR-3183|miR-3919|miR-3922-5p|miR-424-5p|miR-4294|miR-4319|miR-4642|miR-4709-5p|miR-4711-5p|miR-497-5p|miR-5095|miR-574-5p|miR-6503-3p|miR-670-5p|miR-6716-5p|miR-6738-3p|miR-6742-5p|miR-6796-5p|miR-6835-3p|miR-6838-5p|miR-7151-3p|miR-760	ALG1|ATAD3B|CIAO1|DARS2|GTF3C2|MKI67IP|MRPS12|NONO|PRPF4|RFC5|RUVBL1|STIP1|THOC4|VARS|WDR18	0.74	0.16	0.03	0.58	0.47	0.51	0.51	0.7	2.39	0.29	0.05	1.02	1.94	10.04	9.94416	9.81704	10.5613	9.78357
A_33_P3209176		(NA)							-1.1	-0.13	2.04	-0.97	0.7	0.75	0.75	1.03	2.39	0.15	4.57	1.2	4.71	9.83	8.93806	11.11	10.0115	9.0713
A_22_P00017787		(NA)							0.77	-0.49	-0.39	1.27	0.49	0.53	0.53	0.72	2.39	1.18	0.87	2.74	2.2	2.47	2.10935	2.21064	2.98359	2.60335
Hs.661961		(NA)							-1.27	0.32	2.45	-1.59	0.81	0.87	0.87	1.19	2.39	0.35	4.75	1.93	4.3	3.53	2.79783	4.92584	3.65393	2.47955
Hs.679154		(NA)							0.89	0.18	-0.8	0.71	0.56	0.61	0.61	0.83	2.39	0.26	1.89	1.05	2.15	3.26	3.5831	2.60261	3.49045	3.40483
BMX	BMX non-receptor tyrosine kinase	protein coding	ENSG00000102010	660		GO:0004713|GO:0004715|GO:0004871|GO:0005515|GO:0005829|GO:0006468|GO:0006915|GO:0006921|GO:0007165|GO:0007498|GO:0012501|GO:0032587|GO:0046777	miR-103a-3p|miR-107|miR-15a-5p|miR-15b-5p|miR-16-5p|miR-195-5p|miR-338-5p|miR-340-5p|miR-3606-3p|miR-3646|miR-3652|miR-3662|miR-424-5p|miR-4430|miR-466|miR-4661-5p|miR-4799-5p|miR-497-5p|miR-513a-3p|miR-513c-3p|miR-548ae-3p|miR-548aj-3p|miR-548aq-3p|miR-548x-3p|miR-5692a|miR-622|miR-6828-3p|miR-6838-5p|miR-758-3p		1.68	0.27	0.22	1.41	1.07	1.15	1.15	1.57	2.39	0.2	0.16	1.13	2.17	2.78	2.40825	2.35967	4.04019	2.14045
Hs.363156		(NA)							1.08	0.21	0.07	0.87	0.68	0.74	0.74	1.01	2.39	0.25	0.07	1.07	2.01	2.72	2.54551	2.40906	3.48709	2.33967
ENSG00000257002		asRNA	ENSG00000257002						0.9	0.03	-0.32	0.88	0.57	0.62	0.62	0.84	2.39	0.03	0.54	1.37	1.52	2.58	2.52692	2.17878	3.08322	2.50147
CYB561D2	cytochrome b561 family, member D2	protein coding	ENSG00000114395	11068			miR-101-3p|miR-3919|miR-4267|miR-4747-5p|miR-5196-5p|miR-6744-5p|miR-6783-5p|miR-6845-3p|miR-7162-3p|miR-766-3p	C15orf44	0.8	0.39	0.25	0.41	0.51	0.55	0.55	0.75	2.38	0.83	0.45	0.57	2.33	8.44	8.38382	8.23633	9.03649	7.98949
A_22_P00025780		(NA)							0.84	-0.77	-0.95	1.61	0.54	0.58	0.58	0.79	2.38	1.9	2.5	3.3	2.34	2.45	2.16393	1.98507	2.82564	2.93022
A_33_P3210880		(NA)							-1.26	-0.36	1.11	-0.9	0.8	0.87	0.87	1.18	2.38	0.4	1.83	0.9	2.23	2.72	2.19591	3.66705	2.40977	2.55301
A_22_P00007109		(NA)							0.79	-0.07	-0.6	0.85	0.5	0.54	0.54	0.74	2.38	0.1	1.5	1.59	1.59	2.42	2.47777	1.9445	2.72974	2.54404
A_21_P0010319		(NA)							0.85	-0.18	-0.22	1.03	0.54	0.58	0.58	0.79	2.38	0.29	0.36	1.85	1.84	2.33	2.09198	2.05433	2.90154	2.27476
Hs.579266		(NA)							-2.07	1.22	2	-3.28	1.32	1.43	1.43	1.94	2.38	1.05	2.05	2.62	1.88	3.24	3.61717	4.39713	2.32761	2.40194
Hs.621362		(NA)							-1.09	-0.29	2.16	-0.8	0.7	0.75	0.75	1.03	2.37	0.37	4.84	0.93	5.29	11.5	10.4222	12.8721	11.7802	10.7131
HM13	histocompatibility (minor) 13	protein coding	ENSG00000101294	81502		GO:0005515|GO:0005783|GO:0005789|GO:0005791|GO:0008233|GO:0009986|GO:0016020|GO:0031625|GO:0033619|GO:0036513|GO:0042500|GO:0042803|GO:0051289|GO:0071458|GO:0071556|GO:1904211	miR-1224-3p|miR-1252-5p|miR-18a-3p|miR-296-5p|miR-4271|miR-4316|miR-4319|miR-4455|miR-4532|miR-455-3p|miR-4716-3p|miR-5187-5p|miR-5681a|miR-6081|miR-6724-5p|miR-6728-5p|miR-6773-5p|miR-6780b-5p|miR-6794-5p|miR-6825-5p|miR-6894-3p		0.71	0.05	0.33	0.65	0.45	0.49	0.49	0.66	2.37	0.09	0.78	1.27	3.16	10.54	10.2103	10.4899	11.1958	10.1562
MYL6B	myosin, light chain 6B, alkali, smooth muscle and non-muscle	protein coding	ENSG00000196465	140465	04270|04921	GO:0003774|GO:0005515|GO:0005829|GO:0005859|GO:0006936|GO:0007519|GO:0008307|GO:0016459|GO:0016461|GO:0030049|GO:0070062	miR-3652|miR-4430|miR-4456|miR-510-3p		-0.65	-0.27	-0.36	-0.38	0.42	0.45	0.45	0.61	2.37	0.65	0.97	0.69	2.99	10.36	10.528	10.433	9.78305	10.7951
A_33_P3331791		(NA)							-1.12	0.12	2.03	-1.24	0.72	0.78	0.78	1.06	2.37	0.13	4.39	1.62	4.11	6.37	5.67598	7.58169	6.45916	5.55526
A_33_P3364869		(NA)							-1.53	-0.69	1.01	-0.84	0.98	1.06	1.06	1.45	2.37	0.73	1.22	0.63	2.08	6.05	5.40983	7.11692	5.58268	6.10449
ANKRD20A2	ankyrin repeat domain 20 family, member A2	protein coding	ENSG00000276203	441425			let-7f-2-3p|miR-1185-1-3p|miR-1185-2-3p|miR-126-5p|miR-196a-3p|miR-2053|miR-323a-3p|miR-3606-3p|miR-3680-5p|miR-3688-5p|miR-384|miR-3934-5p|miR-3973|miR-4517|miR-4667-5p|miR-4694-3p|miR-4700-5p|miR-5009-3p|miR-513a-3p|miR-513c-3p|miR-556-5p|miR-590-3p|miR-6074|miR-610|miR-625-3p|miR-627-3p|miR-6516-3p|miR-653-5p|miR-6889-3p|miR-8089|miR-944		-1.72	0.11	1.65	-1.83	1.1	1.19	1.19	1.62	2.37	0.07	2.02	1.54	1.88	4.25	3.91088	5.45045	3.72813	3.80264
Hs.625026		(NA)							0.92	0.73	0.26	0.19	0.59	0.63	0.63	0.86	2.37	1.57	0.39	0.19	2.33	3.55	3.70445	3.23371	4.1516	2.97744
A_33_P3278501		(NA)							-0.87	0.29	0.7	-1.16	0.56	0.6	0.6	0.82	2.37	0.49	1.59	2.08	1.62	2.43	2.50247	2.90875	2.03621	2.21192
CAMSAP3	calmodulin regulated spectrin-associated protein family, member 3	protein coding	ENSG00000076826	57662		GO:0000226|GO:0005737|GO:0005915|GO:0010923|GO:0033043|GO:0034453|GO:0045218|GO:0051011|GO:0070507|GO:0090136	miR-1233-3p|miR-1275|miR-378a-3p|miR-378c|miR-378d|miR-378e|miR-378h|miR-378i|miR-3943|miR-422a|miR-4267|miR-4319|miR-4447|miR-4524b-3p|miR-4700-3p|miR-4753-3p|miR-5004-5p|miR-6779-3p|miR-6809-3p|miR-6810-5p|miR-6825-5p|miR-6840-3p|miR-6854-5p|miR-7106-5p|miR-7154-3p|miR-942-5p|miR-944		-1.02	-0.04	0.96	-0.98	0.65	0.7	0.7	0.95	2.37	0.04	1.98	1.34	1.97	2.33	2.06216	3.05916	2.04351	2.10201
A_21_P0001152		(NA)							-1.09	-0.04	1.61	-1.05	0.7	0.75	0.75	1.03	2.36	0.04	3.5	1.34	3.37	9.88	9.28214	10.9362	9.84796	9.32199
Hs.735357		(NA)							-0.86	-0.12	1.96	-0.73	0.55	0.59	0.59	0.81	2.36	0.18	5.59	1.14	5.92	7.63	6.72162	8.80448	7.94748	6.84504
YPEL4	yippee-like 4 (Drosophila)	protein coding	ENSG00000166793	219539			miR-106a-5p|miR-106b-5p|miR-1207-5p|miR-149-3p|miR-154-3p|miR-17-5p|miR-1915-3p|miR-204-5p|miR-211-5p|miR-2682-3p|miR-3151-5p|miR-3201|miR-33b-3p|miR-361-3p|miR-3679-3p|miR-3681-5p|miR-3688-3p|miR-3918|miR-3924|miR-4419a|miR-4446-5p|miR-4456|miR-4463|miR-4685-5p|miR-4722-3p|miR-4728-5p|miR-4739|miR-4755-5p|miR-4763-3p|miR-485-3p|miR-487a-3p|miR-5006-3p|miR-515-3p|miR-519e-3p|miR-539-3p|miR-548as-…	AFG3L1|GSC|PHIP	1.13	-0.62	-1.82	1.75	0.72	0.78	0.78	1.06	2.36	0.95	3.86	2.52	3.01	4.54	4.75035	3.5518	4.68035	5.36812
ZBTB33	zinc finger and BTB domain containing 33	protein coding	ENSG00000177485	10009		GO:0005515|GO:0005634|GO:0005654|GO:0005730|GO:0005737|GO:0005886|GO:0008327|GO:0035556|GO:0043565|GO:0045892	let-7c-3p|miR-10b-3p|miR-1250-3p|miR-1252-3p|miR-1275|miR-138-2-3p|miR-145-5p|miR-150-3p|miR-153-5p|miR-15a-5p|miR-15b-5p|miR-16-5p|miR-1825|miR-1915-3p|miR-195-5p|miR-22-5p|miR-2682-3p|miR-302e|miR-3064-3p|miR-3121-5p|miR-3128|miR-3152-5p|miR-3160-3p|miR-3179|miR-32-3p|miR-3202|miR-335-3p|miR-3658|miR-371b-5p|miR-373-5p|miR-3925-3p|miR-3936|miR-3942-3p|miR-424-5p|miR-4263|miR-4272|miR-4288|miR-4…	FBXO28|HEATR1|NSMAF|PBRM1|RBM26|RPAP3|TAF11|THEX1	0.96	0.26	-0.5	0.7	0.62	0.66	0.66	0.91	2.36	0.37	0.89	0.92	1.61	5.84	6.0415	5.28381	6.24338	5.78414
CMIP	c-Maf inducing protein	protein coding	ENSG00000153815	80790		GO:0005515	miR-1226-5p|miR-1227-5p|miR-1268a|miR-1268b|miR-1275|miR-1908-5p|miR-221-5p|miR-29b-1-5p|miR-3065-5p|miR-3123|miR-3529-3p|miR-3616-3p|miR-3662|miR-4293|miR-4419a|miR-4447|miR-4472|miR-4492|miR-4498|miR-4651|miR-4659a-3p|miR-4659b-3p|miR-4668-3p|miR-4672|miR-4710|miR-4761-3p|miR-5001-5p|miR-5004-5p|miR-5011-5p|miR-542-3p|miR-548e-5p|miR-564|miR-582-5p|miR-600|miR-608|miR-637|miR-663a|miR-6742-5p|m…		1.14	-0.02	-0.34	1.16	0.73	0.79	0.79	1.07	2.36	0.02	0.42	1.44	1.57	5.52	5.38549	5.06875	6.20513	5.40674
RBL1	retinoblastoma-like 1	protein coding	ENSG00000080839	5933	04110|04350|05203	GO:0000278|GO:0005515|GO:0005654|GO:0006351|GO:0006367|GO:0007179|GO:0008134|GO:0010467|GO:0043550|GO:0045944	miR-106a-5p|miR-106b-5p|miR-122-5p|miR-124-3p|miR-1261|miR-1273f|miR-1277-5p|miR-1278|miR-146a-5p|miR-146b-5p|miR-16-2-3p|miR-17-5p|miR-190a-3p|miR-195-3p|miR-200b-3p|miR-200c-3p|miR-20a-5p|miR-20b-5p|miR-2113|miR-2392|miR-302a-3p|miR-302b-3p|miR-302c-3p|miR-302d-3p|miR-302e|miR-3145-3p|miR-3158-5p|miR-324-5p|miR-3646|miR-3662|miR-371b-5p|miR-372-3p|miR-373-3p|miR-373-5p|miR-3935|miR-3938|miR-397…	ANAPC5|BRCA2|CCNE2|HEATR3|MCM8|MCPH1|NEDD1|PSPC1|RNASEH1|RPAP3|TAF11|WDR89	1.42	0.11	-0.69	1.31	0.91	0.98	0.98	1.34	2.36	0.09	0.8	1.26	1.47	5.38	5.45253	4.65078	6.0708	5.33877
Hs.657510		(NA)							-1.53	-0.35	2.59	-1.18	0.98	1.06	1.06	1.44	2.36	0.3	4.08	0.99	4.37	5.24	4.01095	6.95357	5.4235	4.35955
LHX6	LIM homeobox 6	protein coding	ENSG00000106852	26468		GO:0005515|GO:0005634|GO:0021799|GO:0021800|GO:0021853|GO:0048469	miR-100-3p|miR-106a-5p|miR-106b-5p|miR-1197|miR-1202|miR-1227-5p|miR-1266-5p|miR-1273f|miR-1275|miR-1285-3p|miR-1287-5p|miR-1302|miR-1324|miR-141-3p|miR-149-5p|miR-17-5p|miR-183-3p|miR-188-3p|miR-18a-3p|miR-1910-3p|miR-200a-3p|miR-205-3p|miR-20a-5p|miR-20b-5p|miR-214-3p|miR-218-1-3p|miR-22-3p|miR-2682-3p|miR-302a-3p|miR-302b-3p|miR-302c-3p|miR-302d-3p|miR-302e|miR-3124-3p|miR-3180-5p|miR-3184-5p|…	ABTB2|MYCN|TREX2|TRIM65	1.19	-0.15	-0.08	1.34	0.76	0.82	0.82	1.12	2.36	0.15	0.08	1.65	2.05	2.54	2.15705	2.22388	3.41115	2.30689
OR52B2	olfactory receptor, family 52, subfamily B, member 2	protein coding	ENSG00000255307	255725	04740	GO:0005886			0.83	0.21	0.01	0.62	0.53	0.57	0.57	0.78	2.36	0.34	0.02	0.95	1.85	2.38	2.30142	2.10789	2.93551	2.09394
RAC2	ras-related C3 botulinum toxin substrate 2 (rho family, small GTP binding protein Rac2)	protein coding	ENSG00000128340	5880	04010|04014|04015|04024|04062|04071|04310|04360|04370|04510|04520|04650|04662|04664|04666|04670|04810|05200|05210|05212|05231|05416	GO:0003924|GO:0005525|GO:0005829|GO:0005886|GO:0005925|GO:0007015|GO:0007165|GO:0007264|GO:0007411|GO:0007596|GO:0010310|GO:0010592|GO:0010810|GO:0030027|GO:0030168|GO:0030670|GO:0051056|GO:0060263|GO:0070062|GO:0071593|GO:0090023|GO:1902622|GO:1903955	miR-1207-5p|miR-2355-5p|miR-3128|miR-3150b-3p|miR-3176|miR-3664-3p|miR-3922-3p|miR-3944-5p|miR-4329|miR-4459|miR-4468|miR-4492|miR-4515|miR-4651|miR-4663|miR-4712-5p|miR-4720-3p|miR-4763-3p|miR-4779|miR-4784|miR-515-5p|miR-519e-5p|miR-5589-5p|miR-608|miR-6756-5p|miR-6766-5p|miR-6838-3p|miR-7150|miR-7156-3p|miR-770-5p	CORO1A|DAPP1|INPP5D|LPXN|NMI|PYCARD	1.11	-0.94	-0.08	2.05	0.71	0.77	0.77	1.05	2.35	1.71	0.08	3.14	3.59	9.72	8.77063	9.63841	10.7454	9.71441
PXMP4	peroxisomal membrane protein 4, 24kDa	protein coding	ENSG00000101417	11264	04146	GO:0005515|GO:0005777|GO:0005778	miR-1227-5p|miR-1233-3p|miR-125a-5p|miR-125b-5p|miR-1277-5p|miR-1290|miR-15a-5p|miR-15b-5p|miR-16-5p|miR-194-3p|miR-195-5p|miR-203a-5p|miR-2053|miR-2276-5p|miR-3190-3p|miR-3200-5p|miR-329-3p|miR-362-3p|miR-3646|miR-3665|miR-3670|miR-3692-5p|miR-3714|miR-3915|miR-424-5p|miR-4254|miR-4271|miR-4318|miR-4319|miR-4447|miR-4455|miR-4478|miR-4482-3p|miR-4486|miR-4491|miR-4499|miR-449b-3p|miR-450a-2-3p|m…		1.04	0.34	-1.18	0.69	0.67	0.72	0.72	0.98	2.35	0.49	2.51	0.81	2.93	7.69	8.2988	6.77252	7.8119	7.95398
ANKRD36B	ankyrin repeat domain 36B	protein coding	ENSG00000196912	57730		GO:0005515	miR-1207-3p|miR-1275|miR-19a-5p|miR-19b-1-5p|miR-19b-2-5p|miR-27a-3p|miR-27b-3p|miR-29b-2-5p|miR-3154|miR-3179|miR-3652|miR-374c-5p|miR-3934-3p|miR-4261|miR-4430|miR-4451|miR-4531|miR-4681|miR-4728-3p|miR-5095|miR-5096|miR-548au-3p|miR-5696|miR-592|miR-599|miR-6080|miR-641|miR-650|miR-655-3p|miR-6778-3p|miR-6873-5p|miR-7-5p|miR-892c-5p		-1.09	-0.08	2.96	-1.01	0.7	0.76	0.76	1.03	2.35	0.08	6.55	1.27	6.91	6.71	5.3624	8.40058	7.30927	5.43915
LOC101927712	uncharacterized LOC101927712	other ncRNA							-0.71	-0.3	-0.32	-0.41	0.46	0.49	0.49	0.67	2.35	0.66	0.74	0.68	2.69	6.6	6.74153	6.71309	6.00481	7.0373
NUTM2B	NUT family member 2B	protein coding	ENSG00000188199	729262			miR-216b-3p|miR-4260|miR-4516|miR-4723-5p|miR-549a|miR-5698|miR-637|miR-6870-5p|miR-7111-5p		1.19	-0.44	-0.35	1.64	0.77	0.83	0.83	1.13	2.35	0.56	0.41	2.14	2	2.7	2.24008	2.333	3.526	2.68226
ENSG00000232729		other ncRNA	ENSG00000232729						-1.15	-0.8	1.43	-0.36	0.74	0.8	0.8	1.09	2.35	1.29	2.8	0.3	4.03	4.97	3.93514	6.16036	5.00572	4.73323
ZNF417	zinc finger protein 417	protein coding	ENSG00000173480	147687		GO:0005515		ASB10|PBRM1	-0.99	-0.55	0.09	-0.45	0.64	0.69	0.69	0.94	2.35	0.95	0.1	0.48	1.79	4.52	4.33863	4.97218	3.98142	4.88373
ISLR2	immunoglobulin superfamily containing leucine-rich repeat 2	protein coding	ENSG00000167178	57611		GO:0009986|GO:0045773	miR-1249-5p|miR-1321|miR-1827|miR-1908-5p|miR-217|miR-29a-3p|miR-29b-3p|miR-29c-3p|miR-3126-5p|miR-3178|miR-3179|miR-3191-3p|miR-3202|miR-3656|miR-431-5p|miR-4441|miR-4447|miR-4505|miR-4651|miR-4739|miR-4747-5p|miR-4756-5p|miR-488-3p|miR-5196-5p|miR-5681a|miR-5787|miR-608|miR-6510-5p|miR-6515-5p|miR-663a|miR-6722-3p|miR-6752-5p|miR-6787-5p|miR-6797-5p|miR-6807-3p|miR-6808-5p|miR-6812-5p|miR-6842-…		2.37	-0.15	0.72	2.52	1.53	1.65	1.65	2.25	2.35	0.07	0.44	1.52	2.89	3.58	2.45579	3.32731	5.7	2.60356
A_21_P0011462		(NA)							-1.06	0.2	1.42	-1.26	0.68	0.74	0.74	1	2.35	0.24	3.08	1.77	2.6	3.38	3.05635	4.2713	3.21184	2.8553
A_21_P0006237		(NA)							1.19	-0.1	0.01	1.29	0.77	0.83	0.83	1.13	2.35	0.1	0.01	1.57	2.14	2.53	2.13414	2.24335	3.43252	2.23694
A_22_P00010755		(NA)							0.93	0.18	-0.17	0.75	0.6	0.65	0.65	0.88	2.35	0.25	0.23	1.04	1.6	2.36	2.33038	1.98183	2.9159	2.14827
PMP22	peripheral myelin protein 22	protein coding	ENSG00000109099	5376		GO:0005515|GO:0005886|GO:0007268|GO:0007422|GO:0008219|GO:0032060	miR-1233-5p|miR-1245b-3p|miR-1258|miR-1265|miR-1273h-5p|miR-1321|miR-1324|miR-136-5p|miR-139-5p|miR-149-3p|miR-1910-5p|miR-2115-3p|miR-299-3p|miR-29a-3p|miR-29b-3p|miR-29c-3p|miR-300|miR-30b-3p|miR-3158-3p|miR-3163|miR-3167|miR-3174|miR-3198|miR-323b-3p|miR-329-5p|miR-3612|miR-3689a-3p|miR-3689b-3p|miR-3689c|miR-377-3p|miR-381-3p|miR-3942-3p|miR-4288|miR-4294|miR-4309|miR-4317|miR-4419a|miR-4443|…	LAMA4	0.97	0.15	-1.75	0.82	0.63	0.68	0.68	0.92	2.34	0.19	4.32	1.11	4.49	11.21	11.9882	10.0956	11.0677	11.8407
Hs.567779		(NA)							-0.91	-0.14	1.85	-0.78	0.59	0.64	0.64	0.87	2.34	0.18	4.93	1.12	5.17	9.91	9.06725	11.0542	10.1406	9.2028
SLC38A1	solute carrier family 38, member 1	protein coding	ENSG00000111371	81539	04724|04727	GO:0001504|GO:0005515|GO:0005886|GO:0006811|GO:0006865|GO:0007268|GO:0055085|GO:0070062	let-7f-2-3p|miR-100-3p|miR-1182|miR-1185-1-3p|miR-1185-2-3p|miR-1202|miR-1229-3p|miR-1245b-3p|miR-1249-5p|miR-1252-5p|miR-1275|miR-1302|miR-130a-5p|miR-138-2-3p|miR-138-5p|miR-1468-3p|miR-146a-3p|miR-146a-5p|miR-146b-5p|miR-148a-5p|miR-153-5p|miR-16-1-3p|miR-182-3p|miR-185-3p|miR-204-3p|miR-205-3p|miR-2052|miR-2110|miR-222-5p|miR-2355-5p|miR-23a-3p|miR-23b-3p|miR-23c|miR-301b-5p|miR-302f|miR-3126…		-1.04	-0.22	1	-0.82	0.67	0.72	0.72	0.99	2.34	0.28	2	1	2.23	8.85	8.4275	9.6481	8.60948	8.65044
GUSBP1	glucuronidase, beta pseudogene 1	pseudogene	ENSG00000183666	728411					-1.28	-0.15	1.43	-1.13	0.83	0.89	0.89	1.22	2.34	0.14	2.43	1.18	2.45	7.97	7.44466	9.02348	7.73929	7.59723
NEFH	neurofilament, heavy polypeptide	protein coding	ENSG00000100285	4744	05014	GO:0005198|GO:0005200|GO:0005737|GO:0007409|GO:0008017|GO:0019894|GO:0019901|GO:0030031|GO:0030424|GO:0030674|GO:0033693|GO:0045502|GO:0061564|GO:0097418|GO:1902513	miR-1236-3p|miR-1285-3p|miR-137|miR-149-3p|miR-25-3p|miR-3173-3p|miR-3187-5p|miR-32-5p|miR-328-5p|miR-3609|miR-3614-5p|miR-363-3p|miR-367-3p|miR-3677-5p|miR-3910|miR-3912-5p|miR-3978|miR-4325|miR-4328|miR-4497|miR-450a-1-3p|miR-452-3p|miR-4659a-3p|miR-4659b-3p|miR-4682|miR-4779|miR-486-3p|miR-5189-5p|miR-548ah-5p|miR-548au-3p|miR-548az-5p|miR-548t-5p|miR-5690|miR-605-3p|miR-612|miR-644a|miR-6513-…		1.71	0.26	-2.46	1.45	1.1	1.19	1.19	1.63	2.34	0.19	3.35	1.12	3.42	6.37	7.41403	4.69217	6.40573	7.1541
AGK	acylglycerol kinase	protein coding	ENSG00000262327	55750	00561|01100	GO:0005739|GO:0005741|GO:0019432|GO:0035338|GO:0043231|GO:0044255|GO:0044281|GO:0047620	miR-1226-3p|miR-1243|miR-1261|miR-1305|miR-130a-5p|miR-15a-5p|miR-15b-5p|miR-16-5p|miR-181a-3p|miR-195-5p|miR-23a-3p|miR-23b-3p|miR-23c|miR-296-5p|miR-3065-3p|miR-3133|miR-3145-3p|miR-3201|miR-3646|miR-3670|miR-3688-3p|miR-3692-5p|miR-378a-3p|miR-378b|miR-378c|miR-378d|miR-378e|miR-378f|miR-378h|miR-378i|miR-422a|miR-424-5p|miR-4261|miR-4266|miR-4293|miR-4318|miR-4328|miR-4433a-5p|miR-4447|miR-44…		0.82	0.48	-0.25	0.34	0.53	0.57	0.57	0.78	2.34	1.02	0.43	0.44	1.84	5.63	5.89609	5.17162	5.98773	5.42021
C19orf47	chromosome 19 open reading frame 47	protein coding	ENSG00000160392	126526		GO:0005515|GO:0005654	let-7a-5p|let-7b-5p|let-7c-5p|let-7d-5p|let-7e-5p|let-7f-5p|let-7g-5p|let-7i-5p|miR-1275|miR-224-5p|miR-3179|miR-4270|miR-4271|miR-4306|miR-4419a|miR-4441|miR-4447|miR-4456|miR-4458|miR-4500|miR-4725-3p|miR-4727-5p|miR-6127|miR-661|miR-6721-5p|miR-6731-5p|miR-6754-5p|miR-6760-5p|miR-6780b-5p|miR-8085|miR-98-5p		1.03	0.5	-1.04	0.53	0.66	0.72	0.72	0.98	2.34	0.81	2.14	0.57	2.9	3.21	3.85853	2.31808	3.34746	3.35481
A_33_P3408237		(NA)							-1.33	-0.09	2.08	-1.24	0.86	0.93	0.93	1.26	2.34	0.08	3.7	1.27	3.64	3.11	2.28943	4.4603	3.13089	2.38202
A_21_P0008933		(NA)							-0.91	-0.14	0.76	-0.77	0.59	0.64	0.64	0.87	2.34	0.2	1.65	1.1	1.87	2.26	1.98788	2.89086	1.97931	2.13249
CUL9	cullin 9	protein coding	ENSG00000112659	23113		GO:0000226|GO:0005515|GO:0007088|GO:0016567|GO:0031461			-0.88	0.16	0.89	-1.05	0.57	0.62	0.62	0.84	2.33	0.23	2.12	1.74	1.83	8.47	8.34915	9.07571	8.19167	8.18607
ENSG00000244998		asRNA	ENSG00000244998						-1.12	-0.34	1.85	-0.78	0.72	0.78	0.78	1.06	2.33	0.43	3.93	0.85	4.35	8.15	7.21868	9.40428	8.28899	7.55712
FANCC	Fanconi anemia, complementation group C	protein coding	ENSG00000158169	2176	03460	GO:0005515|GO:0005634|GO:0005654|GO:0005737|GO:0005829|GO:0006281|GO:0006461|GO:0036297|GO:0043240|GO:0098779	miR-1260a|miR-1260b|miR-1276|miR-1289|miR-1976|miR-3182|miR-4270|miR-4433b-5p|miR-4441|miR-4446-5p|miR-4505|miR-4646-3p|miR-5007-5p|miR-504-3p|miR-5692a|miR-5787|miR-605-3p|miR-6126|miR-6504-3p|miR-670-5p|miR-6754-5p|miR-6755-5p|miR-6817-3p|miR-6840-3p|miR-6873-3p|miR-7108-5p|miR-7110-3p	IQSEC2|UTP20|WDR79	0.95	0.37	-0.61	0.58	0.61	0.66	0.66	0.9	2.33	0.59	1.17	0.71	1.9	6.24	6.58709	5.60434	6.55112	6.21781
AGAP1	ArfGAP with GTPase domain, ankyrin repeat and PH domain 1	protein coding	ENSG00000157985	116987	04144	GO:0005543	miR-101-3p|miR-1207-3p|miR-1249-5p|miR-1269a|miR-1269b|miR-130a-5p|miR-1321|miR-149-3p|miR-1825|miR-185-3p|miR-1913|miR-1915-3p|miR-199a-5p|miR-199b-5p|miR-204-3p|miR-2052|miR-2276-3p|miR-23a-3p|miR-23b-3p|miR-23c|miR-29a-5p|miR-3065-3p|miR-3127-3p|miR-3163|miR-3183|miR-3184-5p|miR-3190-3p|miR-320a|miR-320b|miR-320c|miR-320d|miR-324-3p|miR-326|miR-330-5p|miR-3663-3p|miR-3667-3p|miR-3670|miR-3671|…		-0.74	-0.19	0.35	-0.55	0.48	0.51	0.51	0.7	2.33	0.35	0.76	0.93	1.54	5.85	5.72198	6.25982	5.52342	5.91228
IQCH-AS1	IQCH antisense RNA 1	lincRNA	ENSG00000259673	100506686					-0.89	0.01	-0.31	-0.89	0.58	0.62	0.62	0.85	2.33	0.01	0.52	1.4	2.89	3.05	3.45682	3.13901	2.25091	3.45054
A_22_P00023795		(NA)							0.96	0.31	0.33	0.64	0.62	0.67	0.67	0.91	2.33	0.47	0.5	0.82	2.45	2.78	2.57506	2.5904	3.54553	2.26491
ENSG00000224049		lincRNA	ENSG00000224049						-0.81	0.23	0.36	-1.03	0.52	0.56	0.56	0.77	2.33	0.39	0.7	1.94	1.63	2.63	2.81955	2.95043	2.14295	2.59277
A_33_P3219745		(NA)							1.32	-0.07	0.09	1.39	0.85	0.92	0.92	1.26	2.33	0.06	0.08	1.49	2.22	2.48	2.02807	2.19143	3.50969	2.09894
LOC101928530	uncharacterized LOC101928530	asRNA	ENSG00000236617	101928530					-0.93	-0.38	0.39	-0.54	0.6	0.65	0.65	0.88	2.33	0.64	0.65	0.67	1.67	2.47	2.224	2.99748	2.07089	2.60791
UAP1	UDP-N-acetylglucosamine pyrophosphorylase 1	protein coding	ENSG00000117143	6675	00520|01100	GO:0003977|GO:0005654|GO:0005737|GO:0005829|GO:0005886|GO:0006048|GO:0006488|GO:0018279|GO:0042802|GO:0043687|GO:0044267	let-7c-3p|miR-2115-5p|miR-212-5p|miR-3148|miR-3163|miR-4259|miR-4425|miR-4470|miR-450a-1-3p|miR-4782-5p|miR-508-5p|miR-548as-3p|miR-5706|miR-624-5p|miR-6747-3p		0.78	0.67	-0.14	0.11	0.51	0.55	0.55	0.75	2.32	1.72	0.23	0.11	2.23	9.21	9.57291	8.75604	9.53656	8.89841
PPP5C	protein phosphatase 5, catalytic subunit	protein coding	ENSG00000011485	5536	04010	GO:0000165|GO:0000186|GO:0004721|GO:0004722|GO:0004871|GO:0005515|GO:0005524|GO:0005634|GO:0005654|GO:0005737|GO:0005829|GO:0006281|GO:0006302|GO:0006351|GO:0006470|GO:0007067|GO:0007173|GO:0007264|GO:0007265|GO:0007411|GO:0008286|GO:0008543|GO:0038095|GO:0042802|GO:0043123|GO:0043231|GO:0043234|GO:0043531|GO:0045087|GO:0048010|GO:0048011	miR-1908-5p|miR-1913|miR-2276-5p|miR-302c-5p|miR-324-3p|miR-3973|miR-4292|miR-4447|miR-4640-3p|miR-4731-5p|miR-4758-3p|miR-520d-5p|miR-524-5p|miR-548a-5p|miR-548ab|miR-548ad-5p|miR-548ae-5p|miR-548ak|miR-548am-5p|miR-548ap-5p|miR-548aq-5p|miR-548ar-5p|miR-548as-5p|miR-548au-5p|miR-548ay-5p|miR-548b-5p|miR-548bb-5p|miR-548c-5p|miR-548d-5p|miR-548h-5p|miR-548i|miR-548j-5p|miR-548o-5p|miR-548w|miR-5…	ATAD3B|CREBZF|DDB1|DDX19A|DDX19B|DDX59|DEDD|GCN1L1|GPS1|GTF2F1|GTF3C2|HEATR2|HSF1|HTATSF1|KBTBD4|MAZ|MRPS12|MSH6|MTA1|PATZ1|PDCD11|POLR2E|RBM42|RUVBL1|RXRB|SFRS1|SMARCA4|SREBF2|STIP1|SYMPK|TFDP1|TMTC4|UACA|WDR77|WHSC1|XPNPEP1|ZBTB20|ZNF160|ZNF317|ZNF672	-1.39	-0.04	1.37	-1.34	0.9	0.97	0.97	1.33	2.32	0.03	2.05	1.32	1.99	5.27	4.87865	6.28612	4.90007	4.92049
SNORA71B	small nucleolar RNA, H/ACA box 71B	other ncRNA	ENSG00000235408					RPS28	0.86	0.14	-0.3	0.72	0.56	0.6	0.6	0.82	2.32	0.21	0.5	1.08	1.46	4.89	4.92634	4.48659	5.34982	4.78187
A_33_P3299766		(NA)							-1.1	-0.27	2.22	-0.83	0.71	0.77	0.77	1.05	2.32	0.33	4.86	0.94	5.27	4.71	3.62472	6.11197	5.01298	3.89691
Hs.503160		(NA)							0.92	0.16	-0.88	0.76	0.6	0.64	0.64	0.88	2.32	0.22	1.99	1.07	2.15	3.7	4.0459	3.00228	3.92235	3.88525
A_21_P0008608		(NA)							0.87	0.68	0.01	0.19	0.57	0.61	0.61	0.83	2.32	1.49	0.01	0.2	2.05	2.68	2.93719	2.26626	3.1354	2.26121
A_21_P0006324		(NA)							0.92	0.21	-0.15	0.71	0.6	0.65	0.65	0.88	2.32	0.29	0.19	0.98	1.58	2.58	2.56392	2.20967	3.13214	2.35636
Hs.98173		(NA)							0.73	0.33	-0.25	0.4	0.47	0.51	0.51	0.69	2.32	0.71	0.51	0.62	1.66	2.4	2.5811	2.00361	2.72933	2.25564
TMX1	thioredoxin-related transmembrane protein 1	protein coding	ENSG00000139921	81542		GO:0005730|GO:0005783|GO:0005789|GO:0015036|GO:0034976	miR-1224-5p|miR-1250-3p|miR-1252-3p|miR-126-5p|miR-1273d|miR-128-3p|miR-1285-3p|miR-1297|miR-150-3p|miR-154-3p|miR-16-2-3p|miR-195-3p|miR-196a-3p|miR-196a-5p|miR-196b-5p|miR-200b-3p|miR-200c-3p|miR-2113|miR-216a-3p|miR-218-5p|miR-2682-5p|miR-26a-5p|miR-26b-5p|miR-27a-3p|miR-27b-3p|miR-29b-2-5p|miR-300|miR-3117-3p|miR-3163|miR-33a-3p|miR-34b-5p|miR-3529-3p|miR-3613-3p|miR-3616-5p|miR-3617-5p|miR-3…		0.71	0.28	-0.48	0.42	0.46	0.5	0.5	0.68	2.31	0.61	1.24	0.69	1.96	10.72	10.9953	10.2314	10.9377	10.7111
FAM212A	family with sequence similarity 212, member A	protein coding	ENSG00000185614	389119		GO:0005515|GO:0070062			-0.89	-0.26	1.82	-0.63	0.58	0.62	0.62	0.85	2.31	0.41	4.95	0.86	5.45	10.7	9.77128	11.8567	10.969	10.0335
INAFM2	InaF-motif containing 2	protein coding							-1.05	-0.7	1.2	-0.36	0.69	0.74	0.74	1.01	2.31	1.19	2.48	0.33	3.62	7.84	6.97433	8.87054	7.81942	7.66938
Hs.734901		(NA)							-1.16	0.1	1.7	-1.26	0.75	0.81	0.81	1.11	2.31	0.1	3.4	1.54	3.06	7.04	6.51256	8.11194	6.95436	6.41193
DDX31	DEAD (Asp-Glu-Ala-Asp) box polypeptide 31	protein coding	ENSG00000125485	64794		GO:0005515|GO:0005730|GO:0005794|GO:0042254|GO:0043231|GO:0044822	miR-1324|miR-204-3p|miR-3122|miR-3913-5p|miR-4314|miR-4516|miR-4646-5p|miR-6770-5p|miR-765	ANKRD16|BRPF3|C15orf44|CXXC1|DOK7|GNB1L|HNRPM|LGALS14|MIZF|MKRN2|PDLIM4|SNAPC4|TP63|TRAF2|WDR74|ZNF337|ZNF645|ZNF778	1.16	0.63	-0.76	0.52	0.75	0.81	0.81	1.11	2.31	0.92	1.2	0.48	2.2	5.15	5.70829	4.31224	5.46835	5.07667
A_22_P00021043		(NA)							-1.51	0.28	3.02	-1.79	0.99	1.06	1.06	1.45	2.31	0.23	4.79	1.73	4.47	4.66	3.65485	6.39648	4.88295	3.37925
VMAC	vimentin-type intermediate filament associated coiled-coil protein	protein coding	ENSG00000187650	400673			miR-3150b-3p|miR-3182|miR-4317|miR-4524a-3p|miR-4524b-3p|miR-4784|miR-5006-5p|miR-6724-5p|miR-6773-5p|miR-6888-3p|miR-7851-3p|miR-939-3p		-1.33	0.36	0.32	-1.69	0.87	0.94	0.94	1.27	2.31	0.37	0.32	1.9	1.88	3.96	4.40247	4.36537	3.03627	4.04361
A_33_P3351991		(NA)							1.12	-0.08	-0.49	1.19	0.73	0.79	0.79	1.07	2.31	0.08	0.68	1.5	1.44	2.79	2.69463	2.28386	3.39908	2.77032
A_33_P3236222		(NA)							-0.78	0.21	0.64	-0.99	0.51	0.55	0.55	0.75	2.31	0.38	1.6	1.91	1.55	2.58	2.60577	3.03003	2.2518	2.39169
Hs.673866		(NA)							-0.85	0.06	0.61	-0.91	0.56	0.6	0.6	0.82	2.31	0.07	1.31	1.5	1.49	2.47	2.41362	2.96328	2.10889	2.35744
LINC01543	lincRNA 1543	lincRNA	ENSG00000263862						0.74	0.07	-0.12	0.67	0.48	0.52	0.52	0.71	2.31	0.1	0.19	1.21	1.62	2.39	2.30506	2.12095	2.86389	2.2369
A_22_P00018247		(NA)							0.76	0	-0.35	0.76	0.5	0.54	0.54	0.73	2.31	0	0.72	1.38	1.42	2.36	2.34501	1.99817	2.76066	2.34353
ALPK1	alpha-kinase 1	protein coding	ENSG00000073331	80216		GO:0002230|GO:0098779|GO:0098792	miR-1252-5p|miR-1286|miR-135a-5p|miR-135b-5p|miR-150-5p|miR-3173-3p|miR-4255|miR-4266|miR-4284|miR-4289|miR-4323|miR-4435|miR-4463|miR-4667-3p|miR-4693-3p|miR-4768-3p|miR-491-3p|miR-584-5p|miR-592|miR-599|miR-642a-5p|miR-660-5p|miR-6816-3p|miR-6826-5p|miR-6891-5p|miR-6894-5p|miR-8083	MEX3D	-0.87	-0.22	1.7	-0.65	0.57	0.61	0.61	0.84	2.3	0.34	4.67	0.92	5.07	13.1	12.261	14.182	13.3118	12.4822
LINC01420	lincRNA 1420	protein coding	ENSG00000204272						-0.7	-0.25	-0.56	-0.45	0.46	0.49	0.49	0.67	2.3	0.51	1.55	0.76	3.65	10.54	10.8485	10.5324	9.83303	11.0958
CYP2A13	cytochrome P450, family 2, subfamily A, polypeptide 13	protein coding	ENSG00000197838	1553	00980|05204	GO:0005789|GO:0006805|GO:0020037|GO:0044281	miR-4286|miR-7108-3p		1	-0.82	-1.38	1.82	0.65	0.7	0.7	0.96	2.3	1.61	3.16	3.03	2.43	3	2.86997	2.31295	3.30837	3.69241
SLC25A51	solute carrier family 25, member 51	other ncRNA							-1.01	0	2.69	-1.01	0.66	0.71	0.71	0.97	2.3	0	6.38	1.38	6.61	6.79	5.62671	8.3117	7.30663	5.62592
ARHGAP20	Rho GTPase activating protein 20	protein coding	ENSG00000137727	57569		GO:0005829|GO:0007264|GO:0051056	let-7a-3p|let-7b-3p|let-7f-1-3p|miR-1-3p|miR-1244|miR-1262|miR-1264|miR-1277-5p|miR-130a-5p|miR-154-3p|miR-15a-5p|miR-15b-5p|miR-16-5p|miR-195-5p|miR-200b-3p|miR-200c-3p|miR-206|miR-2276-3p|miR-2355-3p|miR-23a-3p|miR-23b-3p|miR-23c|miR-24-1-5p|miR-24-2-5p|miR-26b-3p|miR-3064-5p|miR-3120-3p|miR-3120-5p|miR-3123|miR-3136-5p|miR-3153|miR-3158-5p|miR-3163|miR-3168|miR-3169|miR-330-3p|miR-338-5p|miR-3…		1.3	-0.31	-1.09	1.6	0.85	0.92	0.92	1.25	2.3	0.31	1.64	1.83	1.56	5.4	5.41067	4.62952	5.92833	5.71615
A_22_P00003894		(NA)							-1.44	-0.22	1.97	-1.22	0.94	1.02	1.02	1.39	2.3	0.19	3.11	1.09	3.17	3.57	2.73764	4.93303	3.49342	2.96135
Hs.516383		(NA)							-0.98	-0.11	0.65	-0.87	0.64	0.69	0.69	0.95	2.3	0.14	1.2	1.16	1.54	3.16	2.98457	3.75272	2.77143	3.09885
PYCARD-AS1	PYCARD antisense RNA 1	asRNA	ENSG00000261359	100652740					1.05	-0.09	-1.17	1.14	0.69	0.74	0.74	1.01	2.3	0.1	2.4	1.53	2.11	2.92	3.20074	2.12226	3.16978	3.29072
A_22_P00013869		(NA)							-0.83	-0.18	0.39	-0.65	0.54	0.58	0.58	0.8	2.3	0.28	0.76	0.98	1.48	2.51	2.38823	2.96302	2.13586	2.56939
STON2	stonin 2	protein coding	ENSG00000140022	85439		GO:0005515|GO:0005730|GO:0005737|GO:0030100|GO:0048488	miR-1250-3p|miR-127-5p|miR-129-5p|miR-1301-3p|miR-141-3p|miR-153-5p|miR-181b-2-3p|miR-181b-3p|miR-200a-3p|miR-204-5p|miR-211-5p|miR-2115-3p|miR-2355-3p|miR-3145-3p|miR-3155a|miR-3155b|miR-3182|miR-335-3p|miR-3613-3p|miR-3646|miR-365a-5p|miR-365b-5p|miR-3662|miR-3664-3p|miR-3667-5p|miR-371b-5p|miR-373-5p|miR-411-5p|miR-4261|miR-4279|miR-4291|miR-4311|miR-4318|miR-4420|miR-4423-3p|miR-4426|miR-4496…		-1.05	0.2	0.91	-1.26	0.69	0.74	0.74	1.01	2.3	0.24	1.71	1.74	1.59	2.51	2.4541	3.16086	2.10678	2.25084
SECTM1	secreted and transmembrane 1	protein coding	ENSG00000141574	6398		GO:0004871|GO:0005125|GO:0005615|GO:0005794|GO:0006955|GO:0007165|GO:0007498|GO:0016021|GO:0043123|GO:0070062	miR-3942-3p|miR-4260|miR-4283|miR-432-5p|miR-4538|miR-4633-3p|miR-4736|miR-6500-5p|miR-6745|miR-6786-5p|miR-6874-5p		-1.26	-0.25	-3.25	-1.01	0.82	0.89	0.89	1.21	2.29	0.25	6.16	1.01	8.44	8.03	9.91043	6.91128	5.65562	10.1586
PHLDB3	pleckstrin homology-like domain, family B, member 3	protein coding	ENSG00000176531	653583		GO:0019899	miR-1180-3p|miR-29a-3p|miR-29b-3p|miR-29c-3p|miR-3663-3p|miR-6875-3p		-1.06	-0.27	0.3	-0.79	0.7	0.75	0.75	1.03	2.29	0.34	0.38	0.91	1.48	6.69	6.61662	7.1885	6.12385	6.8908
FAM155A	family with sequence similarity 155, member A	protein coding	ENSG00000204442	728215			miR-1206|miR-128-3p|miR-1305|miR-130a-3p|miR-130b-3p|miR-1321|miR-1322|miR-188-3p|miR-19a-3p|miR-19b-3p|miR-216a-3p|miR-224-3p|miR-301a-3p|miR-301b-3p|miR-3123|miR-3163|miR-3665|miR-3666|miR-3681-3p|miR-3976|miR-4264|miR-429|miR-4291|miR-4295|miR-4436a|miR-4463|miR-4476|miR-4495|miR-4532|miR-4533|miR-454-3p|miR-4652-3p|miR-4700-3p|miR-4739|miR-4756-5p|miR-4765|miR-4778-5p|miR-5000-3p|miR-519a-3p|…		1.97	0.82	3.26	1.15	1.29	1.4	1.4	1.9	2.29	0.63	3.87	0.66	5.97	5.62	3.95508	6.39601	8.36485	3.13629
SMIM1	small integral membrane protein 1 (Vel blood group)	protein coding	ENSG00000235169	388588		GO:0070062			-1.4	-0.52	-0.22	-0.89	0.92	0.99	0.99	1.35	2.29	0.54	0.19	0.73	1.98	4.1	4.21492	4.50823	3.10643	4.73014
A_21_P0012907		(NA)							1	-0.02	-0.02	1.03	0.66	0.71	0.71	0.97	2.29	0.03	0.02	1.41	1.94	3.16	2.88622	2.8866	3.88868	2.91015
Hs.658271		(NA)							-1.01	0.02	0.71	-1.03	0.66	0.72	0.72	0.98	2.29	0.02	1.28	1.4	1.48	2.93	2.83679	3.52635	2.51468	2.81737
KCNMA1-AS2	KCNMA1 antisense RNA 2	asRNA	ENSG00000225497	101929310					-1.02	-0.49	0.14	-0.53	0.67	0.72	0.72	0.98	2.29	0.77	0.17	0.57	1.66	2.81	2.64714	3.28282	2.26229	3.1385
KISS1	KiSS-1 metastasis-suppressor	protein coding	ENSG00000170498	3814		GO:0005515|GO:0005576|GO:0007010			-0.85	0.12	0.39	-0.98	0.56	0.6	0.6	0.82	2.29	0.17	0.72	1.64	1.46	2.54	2.65173	2.91852	2.06662	2.52787
A_33_P3231005		(NA)							-0.9	-0.15	1.83	-0.74	0.59	0.64	0.64	0.87	2.28	0.21	4.85	1.05	5.12	12.81	11.9628	13.9436	13.0469	12.1149
A_33_P3752697		(NA)							-0.92	-0.18	1.64	-0.73	0.6	0.65	0.65	0.89	2.28	0.25	4.23	1	4.47	9.47	8.70675	10.533	9.61743	8.89083
ELOVL1	ELOVL fatty acid elongase 1	protein coding	ENSG00000066322	64834	00062	GO:0005515|GO:0005783|GO:0005789|GO:0009922|GO:0016020|GO:0019367|GO:0019432|GO:0030148|GO:0033559|GO:0034625|GO:0035338|GO:0036109|GO:0042761|GO:0043651|GO:0044255|GO:0044281	miR-1207-5p|miR-1227-5p|miR-129-1-3p|miR-129-2-3p|miR-149-3p|miR-150-5p|miR-18a-3p|miR-18a-5p|miR-18b-5p|miR-1910-5p|miR-29b-2-5p|miR-3182|miR-3714|miR-3934-5p|miR-4271|miR-4302|miR-4441|miR-4463|miR-4640-5p|miR-4651|miR-4717-5p|miR-4725-3p|miR-4726-5p|miR-4728-5p|miR-4735-3p|miR-4763-3p|miR-491-5p|miR-513a-5p|miR-5190|miR-544b|miR-5587-5p|miR-608|miR-625-5p|miR-628-5p|miR-6768-3p|miR-6773-3p|miR…	COPE|GNB2|HMG20B|RNPEP	0.76	-0.04	-0.42	0.79	0.5	0.54	0.54	0.73	2.28	0.05	0.92	1.45	1.39	7.83	7.8222	7.44333	8.1991	7.86056
CDKN1C	cyclin-dependent kinase inhibitor 1C (p57, Kip2)	protein coding	ENSG00000129757	1028	04110	GO:0005515|GO:0005634|GO:0005737|GO:0030511|GO:0033673|GO:0042326|GO:0045892|GO:0045893|GO:0050680	let-7c-3p|miR-1233-5p|miR-129-5p|miR-2277-3p|miR-25-3p|miR-2682-3p|miR-3121-3p|miR-3189-3p|miR-32-5p|miR-363-3p|miR-367-3p|miR-3942-3p|miR-4291|miR-4310|miR-4328|miR-4757-5p|miR-486-3p|miR-507|miR-557|miR-6744-3p|miR-6778-5p|miR-6781-3p|miR-6788-5p|miR-6813-3p|miR-873-5p|miR-9-3p|miR-92a-3p|miR-92b-3p		-2	0.06	-3.29	-2.06	1.32	1.42	1.42	1.94	2.28	0.03	3.83	1.41	6.53	7.01	9.34236	5.9944	3.99354	9.28385
Hs.664877		(NA)							-1.26	-0.01	2.5	-1.25	0.83	0.89	0.89	1.22	2.28	0.01	4.73	1.35	4.7	6.14	5.13328	7.63839	6.38177	5.14236
ZNF843	zinc finger protein 843	protein coding	ENSG00000176723	283933		GO:0005515	miR-188-5p|miR-4251|miR-4769-3p|miR-495-3p|miR-5688|miR-6817-5p|miR-6866-3p|miR-6892-5p		-0.84	-0.32	0.17	-0.52	0.55	0.6	0.6	0.81	2.28	0.55	0.26	0.72	1.55	5.83	5.72476	6.21442	5.37476	6.04048
RNF217	ring finger protein 217	protein coding	ENSG00000146373	154214		GO:0004842|GO:0042787	miR-1227-5p|miR-1245b-3p|miR-1273f|miR-1277-5p|miR-129-5p|miR-1323|miR-153-5p|miR-154-3p|miR-15a-5p|miR-15b-5p|miR-16-5p|miR-192-5p|miR-195-5p|miR-215-5p|miR-216b-3p|miR-3120-3p|miR-3192-5p|miR-3609|miR-3612|miR-3653-5p|miR-3662|miR-3674|miR-374b-3p|miR-3938|miR-3941|miR-3976|miR-424-5p|miR-4262|miR-4311|miR-4326|miR-4422|miR-4491|miR-4499|miR-4504|miR-4514|miR-451b|miR-4657|miR-4659a-3p|miR-4659…		-1.18	-0.1	0.5	-1.08	0.78	0.84	0.84	1.14	2.28	0.1	0.65	1.21	1.4	4.71	4.68198	5.28404	4.10351	4.78245
DEFB121	defensin, beta 121	protein coding	ENSG00000204548	245934		GO:0005515			-1.08	-0.13	0.52	-0.95	0.71	0.77	0.77	1.05	2.28	0.14	0.77	1.14	1.4	2.78	2.69788	3.34645	2.26514	2.82547
RPE65	retinal pigment epithelium-specific protein 65kDa	protein coding	ENSG00000116745	6121	00830	GO:0001523|GO:0001786|GO:0001895|GO:0005886|GO:0006776|GO:0007601|GO:0007603|GO:0016020|GO:0031210|GO:0050908|GO:0052885|GO:1901612	miR-1468-3p|miR-2054|miR-208a-5p|miR-208b-5p|miR-2115-3p|miR-3191-5p|miR-3607-3p|miR-3921|miR-4262|miR-4653-5p|miR-4690-5p|miR-4777-3p|miR-5002-5p|miR-518c-5p|miR-543|miR-548aw|miR-6081|miR-6513-3p|miR-6847-5p|miR-875-5p		0.8	0.2	-0.24	0.6	0.53	0.57	0.57	0.78	2.28	0.33	0.41	0.92	1.46	2.41	2.47641	2.03481	2.83655	2.27512
A_22_P00020285		(NA)							-0.88	-0.01	0.37	-0.86	0.58	0.62	0.62	0.85	2.28	0.02	0.65	1.33	1.39	2.32	2.34593	2.73275	1.85628	2.35896
IL33	interleukin 33	protein coding	ENSG00000137033	90865	04623|05164	GO:0005125|GO:0005515|GO:0043032|GO:0045944|GO:0050729|GO:0090197	let-7a-2-3p|let-7f-2-3p|let-7g-3p|miR-1185-1-3p|miR-1185-2-3p|miR-1244|miR-302f|miR-3154|miR-382-5p|miR-4296|miR-4495|miR-4501|miR-4539|miR-4639-5p|miR-4645-3p|miR-4753-3p|miR-4755-5p|miR-4799-5p|miR-496|miR-499a-5p|miR-5006-3p|miR-520a-5p|miR-525-5p|miR-542-3p|miR-545-5p|miR-548aj-5p|miR-548c-3p|miR-548f-5p|miR-548g-5p|miR-548n|miR-548p|miR-548x-5p|miR-5584-5p|miR-5589-3p|miR-5590-3p|miR-5680|mi…		2.07	0.49	0.44	1.58	1.37	1.48	1.48	2.01	2.27	0.31	0.27	0.94	2.14	9.55	9.12464	9.07233	11.14	8.63568
ZBTB20-AS4	ZBTB20 antisense RNA 4	lincRNA	ENSG00000242767	100874131					-0.9	-0.24	1.87	-0.67	0.6	0.64	0.64	0.88	2.27	0.35	4.9	0.9	5.34	8.22	7.28904	9.38991	8.48722	7.5243
A_22_P00005224		(NA)							-0.93	0.26	2.1	-1.19	0.61	0.66	0.66	0.9	2.27	0.38	5.39	1.89	5.04	6.29	5.61399	7.45225	6.52512	5.35244
A_33_P3372566		(NA)							-1.27	0.07	0.69	-1.33	0.84	0.9	0.9	1.23	2.27	0.06	0.9	1.45	1.38	3.41	3.43727	4.05364	2.78837	3.36792
A_21_P0010774		(NA)							-1.09	-0.04	1.78	-1.05	0.72	0.78	0.78	1.06	2.27	0.04	3.79	1.29	3.69	2.98	2.29078	4.107	3.02116	2.32913
LOC101928509	uncharacterized LOC101928509	lincRNA	ENSG00000248174	101928509					1.11	-0.15	-0.31	1.26	0.73	0.79	0.79	1.08	2.27	0.16	0.37	1.61	1.61	2.62	2.37321	2.21902	3.328	2.52461
A_33_P3298980		(NA)							-1.4	0.56	2.58	-1.96	0.92	0.99	0.99	1.36	2.27	0.6	4.36	2.13	3.68	3.72	3.12997	5.14828	3.75167	2.56842
RAB17	RAB17, member RAS oncogene family	protein coding	ENSG00000124839	64284		GO:0002415|GO:0003924|GO:0005515|GO:0005622|GO:0016323|GO:0016324|GO:0019003|GO:0030139|GO:0030425|GO:0032401|GO:0032402|GO:0032456|GO:0042384|GO:0042470|GO:0043025|GO:0045056|GO:0046847|GO:0050773|GO:0051489|GO:0051963|GO:0055037|GO:0055038|GO:0070062	miR-1343-3p|miR-217|miR-219a-5p|miR-338-3p|miR-412-3p|miR-4317|miR-4520-3p|miR-4782-3p|miR-548av-3p|miR-6754-3p|miR-6766-3p|miR-6783-3p|miR-6807-3p|miR-6827-5p|miR-766-5p	ADARB1|DDX54|REXO1	-1.49	0.64	1.55	-2.13	0.98	1.06	1.06	1.45	2.27	0.66	2.16	2.18	1.76	2.69	2.73098	3.63911	2.15201	2.09216
SLC38A5	solute carrier family 38, member 5	protein coding	ENSG00000017483	92745	04727	GO:0005886|GO:0006811|GO:0006865|GO:0055085	miR-1249-5p|miR-1306-5p|miR-5193|miR-6797-5p|miR-6825-5p		1.47	0.46	-0.82	1	0.97	1.05	1.05	1.43	2.26	0.44	0.93	0.81	1.6	7.9	8.28517	7.004	8.47215	7.82158
BAIAP2-AS1	BAIAP2 antisense RNA 1 (head to head)	lincRNA	ENSG00000226137	440465					-1.03	-0.77	0.3	-0.26	0.68	0.74	0.74	1.01	2.26	1.37	0.39	0.23	2.02	7.17	6.72761	7.79151	6.7605	7.49524
SNORD116-19	small nucleolar RNA, C/D box 116-19	other ncRNA	ENSG00000207460						-1.15	-0.44	1.31	-0.71	0.76	0.83	0.83	1.12	2.26	0.56	2.42	0.7	2.91	7.07	6.35369	8.10507	6.95366	6.79138
NAT1	N-acetyltransferase 1 (arylamine N-acetyltransferase)	protein coding	ENSG00000171428	9	00232|00983|01100|05204	GO:0005829|GO:0006805|GO:0044281	miR-126-5p|miR-1272|miR-153-5p|miR-29a-3p|miR-29b-3p|miR-29c-3p|miR-323a-3p|miR-328-5p|miR-4487|miR-4662a-5p|miR-4795-3p|miR-544b|miR-548g-3p|miR-5682|miR-6084|miR-648|miR-6744-5p|miR-6800-5p|miR-6841-5p|miR-6885-5p|miR-7-1-3p|miR-7-2-3p|miR-7109-5p|miR-8078|miR-887-5p		0.72	0.54	-0.7	0.17	0.47	0.51	0.51	0.7	2.26	1.41	1.99	0.22	3.36	5.96	6.53748	5.2915	6.00702	5.99381
A_33_P3352980		(NA)							-1.06	0.16	1.51	-1.23	0.7	0.76	0.76	1.04	2.26	0.18	3.19	1.63	2.75	5.49	5.09399	6.43642	5.37488	4.9305
Hs.566872		(NA)							-1.4	-0.91	1.63	-0.49	0.93	1.01	1.01	1.37	2.26	1.14	2.48	0.34	3.56	4.52	3.35491	5.89786	4.49293	4.26779
CCDC186	coiled-coil domain containing 186	protein coding	ENSG00000165813	55088			miR-122-5p|miR-1245b-3p|miR-1250-3p|miR-1275|miR-1277-5p|miR-1279|miR-129-1-3p|miR-129-2-3p|miR-1294|miR-130a-5p|miR-136-5p|miR-144-3p|miR-153-5p|miR-200b-3p|miR-200c-3p|miR-200c-5p|miR-2110|miR-224-3p|miR-23a-3p|miR-23b-3p|miR-23c|miR-24-1-5p|miR-24-2-5p|miR-25-3p|miR-26a-1-3p|miR-26a-2-3p|miR-26b-3p|miR-302a-5p|miR-3064-5p|miR-30a-3p|miR-30c-1-3p|miR-30c-2-3p|miR-30d-3p|miR-30e-3p|miR-3120-5p|m…		-1.14	0.15	0.34	-1.29	0.76	0.82	0.82	1.11	2.26	0.15	0.41	1.59	1.56	4.2	4.43509	4.62636	3.4861	4.28739
A_22_P00006270		(NA)							1.02	-0.28	0.09	1.31	0.68	0.73	0.73	1	2.26	0.37	0.1	1.87	2.57	2.65	2.11788	2.49179	3.51454	2.40063
A_22_P00025214		(NA)							0.81	-1.07	-1.15	1.88	0.54	0.58	0.58	0.79	2.25	2.92	3.21	3.95	2.95	3.23	2.84773	2.76334	3.57112	3.9173
LOC158435	uncharacterized LOC158435	lncRNA							-0.88	-0.26	1.45	-0.62	0.59	0.63	0.63	0.86	2.25	0.41	3.79	0.83	4.18	7.55	6.81664	8.53516	7.65087	7.08026
CBFA2T2	core-binding factor, runt domain, alpha subunit 2; translocated to, 2	protein coding	ENSG00000078699	9139		GO:0003714|GO:0005515|GO:0005634|GO:0010976|GO:0010977|GO:0045892	let-7f-2-3p|miR-101-3p|miR-1185-1-3p|miR-1185-2-3p|miR-1231|miR-1252-5p|miR-1268a|miR-1268b|miR-1271-3p|miR-128-1-5p|miR-128-2-5p|miR-1285-3p|miR-130a-5p|miR-1324|miR-134-3p|miR-148b-5p|miR-149-5p|miR-1827|miR-185-3p|miR-221-5p|miR-23a-3p|miR-23b-3p|miR-23c|miR-2467-3p|miR-3117-5p|miR-3187-5p|miR-3201|miR-3612|miR-3662|miR-3675-5p|miR-3919|miR-3978|miR-4271|miR-4277|miR-4286|miR-4318|miR-4328|miR…	ACIN1|PIAS1|RNF12|ZBTB20|ZNF638	-0.89	-0.46	1.18	-0.43	0.59	0.64	0.64	0.87	2.25	0.84	2.92	0.5	3.71	5.34	4.60464	6.2494	5.35707	5.06744
LOC145474	uncharacterized LOC145474	lncRNA							-1.81	0.05	4.06	-1.86	1.2	1.3	1.3	1.77	2.25	0.03	5.31	1.39	5.33	4.02	2.37474	6.38336	4.57563	2.32497
Hs.677028		(NA)							-1.49	0.1	3.31	-1.59	0.99	1.07	1.07	1.46	2.25	0.07	5.24	1.46	5.19	3.73	2.43074	5.64363	4.15257	2.33236
A_33_P3399765		(NA)							-0.94	-0.02	1.26	-0.92	0.63	0.68	0.68	0.92	2.25	0.02	2.97	1.29	2.79	3.65	3.20718	4.49263	3.55424	3.22897
A_22_P00003044		(NA)							1.13	0.94	-0.07	0.18	0.75	0.81	0.81	1.1	2.25	1.61	0.06	0.14	2.06	3.22	3.64682	2.63736	3.76425	2.70304
LOC100507391	uncharacterized LOC100507391	lincRNA	ENSG00000237222	100507391					-1.02	-0.39	1.44	-0.62	0.67	0.73	0.73	0.99	2.25	0.57	3.17	0.69	3.69	3.06	2.27722	4.1104	3.0945	2.67187
FAM20C	family with sequence similarity 20, member C	protein coding	ENSG00000177706	56975		GO:0004674|GO:0005515|GO:0005615|GO:0005794|GO:0006468|GO:0030145|GO:0031214|GO:0070062	miR-1247-5p|miR-141-3p|miR-181b-2-3p|miR-181b-3p|miR-200a-3p|miR-25-3p|miR-3195|miR-32-5p|miR-363-3p|miR-367-3p|miR-3692-3p|miR-4281|miR-4325|miR-4420|miR-4452|miR-4680-3p|miR-5008-5p|miR-6731-3p|miR-6836-3p|miR-92a-3p|miR-92b-3p		-0.96	-0.23	0.92	-0.73	0.64	0.69	0.69	0.94	2.24	0.31	1.92	0.91	2.17	10.49	10.085	11.2441	10.2823	10.3194
PTEN	phosphatase and tensin homolog	protein coding	ENSG00000171862	5728	00562|04068|04070|04071|04115|04150|04151|04510|04530|04931|05161|05200|05206|05213|05214|05215|05218|05222|05230	GO:0000079|GO:0001933|GO:0004438|GO:0004721|GO:0004722|GO:0004725|GO:0005515|GO:0005634|GO:0005654|GO:0005737|GO:0005829|GO:0005886|GO:0006470|GO:0006644|GO:0006661|GO:0006915|GO:0007092|GO:0007173|GO:0007270|GO:0007416|GO:0007417|GO:0007507|GO:0007611|GO:0007626|GO:0008283|GO:0008284|GO:0008285|GO:0008543|GO:0009898|GO:0010975|GO:0010997|GO:0014067|GO:0016314|GO:0016324|GO:0016477|GO:0019899|GO:…	miR-1227-3p|miR-1273f|miR-1277-5p|miR-1279|miR-1285-3p|miR-1297|miR-1299|miR-130a-3p|miR-130a-5p|miR-130b-3p|miR-140-3p|miR-142-5p|miR-148a-3p|miR-148b-3p|miR-152-3p|miR-16-1-3p|miR-181a-5p|miR-181b-5p|miR-181c-5p|miR-181d-5p|miR-188-5p|miR-190a-3p|miR-198|miR-19a-3p|miR-19b-3p|miR-2054|miR-214-3p|miR-22-3p|miR-23a-3p|miR-23b-3p|miR-23c|miR-25-3p|miR-26a-5p|miR-26b-5p|miR-29a-3p|miR-29b-3p|miR-29…	ARID2|FOXK2|MBD1|OSBPL9|RNPC3|SFRS4|SOS1|SP3|TNRC6B|ZCCHC7|ZNF609|ZNF708	-0.71	-0.1	-0.7	-0.6	0.47	0.51	0.51	0.69	2.24	0.17	1.99	1.07	4.38	7.34	7.82453	7.23003	6.52196	7.92943
FLJ31662	uncharacterized LOC440594	lincRNA	ENSG00000233907	440594					-0.85	-0.4	0.83	-0.45	0.56	0.61	0.61	0.83	2.24	0.73	1.99	0.57	2.67	7.02	6.5078	7.74023	6.89297	6.90524
Hs.743373		(NA)							-1.02	-0.04	1.95	-0.98	0.68	0.73	0.73	1	2.24	0.04	4.47	1.27	4.45	6.6	5.80608	7.78702	6.77038	5.84168
A_21_P0003289		(NA)							-4.73	-4.36	1.28	-0.37	3.16	3.41	3.41	4.65	2.24	1.81	0.36	0.06	2.33	5.41	2.79476	8.43514	3.70883	7.15254
ATP6V1E2	ATPase, H+ transporting, lysosomal 31kDa, V1 subunit E2	protein coding	ENSG00000250565	90423	00190|01100|04145|04721|04966|05110|05120|05323	GO:0005515|GO:0005829|GO:0006879|GO:0008286|GO:0033572|GO:0034220|GO:0045454|GO:0055085	miR-4303|miR-584-5p|miR-766-5p	ATAD2B|BRPF3|BTRC|C13orf7|ELAVL3|EVX1|HNRPM|PDCD11|RNF7|RNGTT|SFPQ|SMG7|TAF4B|TBX10|UTP18|ZDHHC17|ZNF192|ZNF317|ZNF645|ZNF778	1.12	0.7	-1.39	0.42	0.75	0.81	0.81	1.1	2.24	1.07	2.68	0.37	3.7	4.9	5.85446	3.76183	4.88346	5.15431
A_33_P3224483		(NA)							-1.08	-0.21	1.86	-0.87	0.72	0.78	0.78	1.06	2.24	0.24	3.97	1	4.17	4.82	3.96169	6.02969	4.94708	4.17181
RACGAP1P	Rac GTPase activating protein 1 pseudogene	pseudogene							1.06	0.56	-0.01	0.51	0.71	0.77	0.77	1.04	2.24	0.84	0	0.5	1.72	3.81	3.93527	3.37361	4.4372	3.37884
A_21_P0003198		(NA)							-1.04	-0.24	0.25	-0.8	0.7	0.75	0.75	1.03	2.24	0.29	0.3	0.93	1.44	3.63	3.60308	4.0907	3.0464	3.84351
SRD5A3-AS1	SRD5A3 antisense RNA 1	other ncRNA	ENSG00000249700	100506462					-1.63	-0.2	0.77	-1.43	1.09	1.18	1.18	1.6	2.24	0.14	0.74	1.11	1.38	3.58	3.45498	4.43375	2.79925	3.65903
A_21_P0008391		(NA)							-0.9	-0.01	1.04	-0.89	0.6	0.65	0.65	0.89	2.24	0.01	2.45	1.31	2.26	3.15	2.82356	3.87647	2.97564	2.8327
A_22_P00017113		(NA)							0.68	-0.35	-0.13	1.04	0.46	0.49	0.49	0.67	2.24	0.83	0.23	2.33	2.36	6.8	6.42605	6.65004	7.3316	6.77953
LOC101059906	collagen alpha-2(IV) chain-like	protein coding							-1	0.13	1.37	-1.13	0.67	0.72	0.72	0.98	2.24	0.15	3.01	1.57	2.6	3.03	2.66597	3.90012	2.8993	2.53509
A_21_P0009096		(NA)							-0.93	-0.16	0.28	-0.77	0.62	0.67	0.67	0.91	2.24	0.21	0.41	1.03	1.41	2.53	2.51316	2.95549	2.02624	2.67512
SEC14L5	SEC14-like 5 (S. cerevisiae)	protein coding	ENSG00000103184	9717			miR-1205|miR-1273h-5p|miR-1275|miR-149-5p|miR-1913|miR-1915-5p|miR-218-1-3p|miR-24-3p|miR-324-3p|miR-326|miR-330-5p|miR-370-3p|miR-4251|miR-4297|miR-4433b-5p|miR-4441|miR-4469|miR-4492|miR-4498|miR-4742-5p|miR-520a-5p|miR-525-5p|miR-6511b-5p|miR-663b|miR-6778-3p|miR-6801-3p|miR-6804-3p|miR-6810-3p|miR-6811-5p|miR-6879-3p|miR-6893-3p		0.93	-0.05	-0.34	0.98	0.62	0.67	0.67	0.91	2.24	0.06	0.52	1.43	1.41	2.18	2.07617	1.78961	2.71686	2.12887
HCFC1R1	host cell factor C1 regulator 1 (XPO1 dependent)	protein coding	ENSG00000103145	54985			miR-1205|miR-149-3p|miR-3182|miR-4271|miR-4297|miR-4419a|miR-4722-5p|miR-4725-3p|miR-4728-5p|miR-491-5p|miR-493-3p|miR-6780b-5p|miR-6785-5p|miR-6796-5p|miR-6883-5p		-0.97	-0.07	-1.14	-0.9	0.65	0.7	0.7	0.95	2.23	0.07	2.51	1.21	5.04	9.55	10.371	9.29647	8.33137	10.4365
SERGEF	secretion regulating guanine nucleotide exchange factor	protein coding	ENSG00000129158	26297		GO:0005087|GO:0005515|GO:0005634|GO:0005737|GO:0007165|GO:0043547|GO:0050709			-1.02	-0.02	-0.24	-1	0.68	0.74	0.74	1.01	2.23	0.02	0.3	1.29	2.41	7.62	8.00258	7.78019	6.76052	8.0226
STAG3	stromal antigen 3	protein coding	ENSG00000066923	10734	04114	GO:0000795|GO:0005615|GO:0005634|GO:0007130|GO:0030893	miR-1197|miR-1321|miR-3929|miR-4251|miR-4419b|miR-4458|miR-4478|miR-4500|miR-4739|miR-4756-5p|miR-5587-5p|miR-5708|miR-665|miR-6873-5p		-1.25	0.24	1.04	-1.49	0.83	0.9	0.9	1.23	2.23	0.24	1.58	1.69	1.5	5.74	5.7008	6.49745	5.25098	5.45935
C7orf25	chromosome 7 open reading frame 25	protein coding	ENSG00000136197	79020		GO:0005515	miR-1260a|miR-1260b|miR-1273h-3p|miR-1273h-5p|miR-154-5p|miR-2116-5p|miR-30b-3p|miR-3145-3p|miR-3166|miR-3684|miR-3689a-3p|miR-3689b-3p|miR-3689c|miR-4328|miR-488-5p|miR-6779-5p|miR-6780a-5p|miR-6799-5p|miR-6849-3p|miR-9-5p		1.15	0.06	-1.39	1.09	0.77	0.83	0.83	1.13	2.23	0.06	2.57	1.23	2.44	4.77	5.24685	3.79842	4.94713	5.18477
A_21_P0002218		(NA)							0.96	-0.44	-0.36	1.4	0.65	0.7	0.7	0.95	2.23	0.69	0.53	2.19	1.88	2.67	2.28695	2.36778	3.33188	2.72282
A_22_P00022830		(NA)							0.95	-0.39	-0.49	1.34	0.64	0.69	0.69	0.94	2.23	0.61	0.83	2.12	1.63	3.27	2.99542	2.89519	3.84533	3.38881
A_33_P3424794		(NA)							-1.05	-0.07	-0.01	-0.99	0.71	0.76	0.76	1.04	2.23	0.07	0.01	1.21	1.83	3.77	4.004	4.06266	3.00776	4.07248
A_21_P0013928		(NA)							1.32	0.07	-0.65	1.25	0.88	0.95	0.95	1.3	2.23	0.05	0.78	1.23	1.35	3.25	3.3001	2.57911	3.89552	3.23177
TRPC2	transient receptor potential cation channel, subfamily C, member 2, pseudogene	pseudogene	ENSG00000182048	7221					0.99	0.19	-0.62	0.8	0.66	0.72	0.72	0.97	2.23	0.24	1.07	0.99	1.51	3.08	3.28658	2.47857	3.46731	3.0964
A_21_P0014139		(NA)							0.86	-0.25	-0.52	1.11	0.58	0.62	0.62	0.85	2.23	0.39	1.03	1.87	1.44	2.61	2.4794	2.20401	3.06571	2.7279
ASNS	asparagine synthetase (glutamine-hydrolyzing)	protein coding	ENSG00000070669	440	00250|01100	GO:0004066|GO:0005515|GO:0005829|GO:0006529|GO:0008652|GO:0030968|GO:0034641|GO:0036499|GO:0042149|GO:0043066|GO:0044267|GO:0044281|GO:0045931	miR-130a-5p|miR-23a-3p|miR-23b-3p|miR-23c|miR-4293	BUB3|CUL4B|DDX55|ECT2|FBXO22|GTF2E2|GTF3C2|INVS|MKI67IP|NCBP2|NCOA1|NONO|NUP50|PPP2R1B|PSMD10|PSPC1|RAD18|RFC5|RNGTT|RPAP3|SEH1L|SRP72|SSBP1|SSRP1|SYNCRIP|THOC4|XRN2|ZNF207	-1.5	-0.58	0.12	-0.92	1.01	1.09	1.09	1.48	2.22	0.56	0.08	0.68	1.58	11.1	11.013	11.7129	10.2141	11.5962
PRAMEF5	PRAME family member 5	protein coding	ENSG00000270601	343068			miR-198|miR-4700-3p|miR-6777-3p|miR-6818-5p|miR-7106-3p		1.25	-0.95	-2.11	2.2	0.84	0.91	0.91	1.23	2.22	1.39	3.86	2.8	2.91	3.27	3.36065	2.20408	3.45096	4.31212
YIF1B	Yip1 interacting factor homolog B (S. cerevisiae)	protein coding	ENSG00000167645	90522			miR-1227-5p|miR-1275|miR-1908-5p|miR-193a-3p|miR-193b-3p|miR-4292|miR-4492|miR-4516|miR-4649-3p|miR-548aa|miR-548ap-3p|miR-548t-3p|miR-6085|miR-663a|miR-6787-5p|miR-6852-5p|miR-762	ZBTB20	0.72	-0.07	-0.57	0.79	0.48	0.52	0.52	0.71	2.22	0.11	1.45	1.51	1.47	7.34	7.39253	6.89758	7.61941	7.46427
GHDC	GH3 domain containing	protein coding	ENSG00000167925	84514		GO:0016020	miR-4419a|miR-4481|miR-6077|miR-6776-5p|miR-6780a-3p|miR-6852-5p|miR-6873-5p|miR-7974		0.86	0.18	0.78	0.68	0.58	0.62	0.62	0.85	2.22	0.26	1.77	0.97	4.03	6.36	5.84368	6.44843	7.30884	5.66587
PHF5A	PHD finger protein 5A	protein coding	ENSG00000100410	84844	03040	GO:0000398|GO:0003700|GO:0005654|GO:0005686|GO:0005689|GO:0008380|GO:0010467|GO:0016607|GO:0044822|GO:0045893	miR-1184|miR-1260a|miR-1260b|miR-21-3p|miR-2681-5p|miR-3162-3p|miR-3591-3p|miR-3672|miR-3692-5p|miR-4326|miR-4417|miR-4419a|miR-4638-3p|miR-4690-5p|miR-5691|miR-6071|miR-651-3p|miR-6760-5p|miR-6776-5p|miR-6805-3p|miR-6811-3p|miR-6825-5p|miR-6864-3p|miR-6868-5p|miR-7106-5p|miR-7109-5p|miR-7515	BUB3|DDX39|DUS3L|FUSIP1|MRPS12|PRPF40A|RFC2|THOC4|WDR18|ZNF192|ZNF207	0.97	0.24	-0.88	0.74	0.66	0.71	0.71	0.96	2.22	0.31	1.75	0.9	2.02	5.9	6.2815	5.1625	6.13647	6.04271
SFT2D2	SFT2 domain containing 2	protein coding	ENSG00000213064	375035		GO:0070062	miR-1226-3p|miR-124-3p|miR-1302|miR-1914-5p|miR-2115-5p|miR-2276-3p|miR-3125|miR-3182|miR-367-5p|miR-3916|miR-4257|miR-4261|miR-4262|miR-4297|miR-4298|miR-4496|miR-4662a-3p|miR-4743-3p|miR-5008-3p|miR-506-3p|miR-513b-5p|miR-520a-5p|miR-525-5p|miR-548an|miR-5581-5p|miR-5582-5p|miR-6737-3p|miR-6758-5p|miR-6856-5p|miR-6859-5p|miR-6870-3p|miR-7157-3p		0.84	-0.03	-0.79	0.87	0.56	0.61	0.61	0.83	2.22	0.03	1.84	1.38	1.72	5.78	5.95134	5.19173	6.03143	5.97915
A_22_P00004927		(NA)							-1.56	-0.38	1.81	-1.18	1.05	1.13	1.13	1.54	2.22	0.31	2.44	0.91	2.63	5.66	4.83504	7.02285	5.46203	5.21274
A_21_P0008581		(NA)							0.94	-0.55	-0.89	1.49	0.63	0.68	0.68	0.93	2.22	0.97	1.85	2.44	1.71	2.7	2.51466	2.17744	3.1195	3.06621
TTC26	tetratricopeptide repeat domain 26	protein coding	ENSG00000105948	79989		GO:0006996|GO:0007224|GO:0030992|GO:0042073|GO:0042384|GO:0072372|GO:0097542	miR-124-3p|miR-1252-5p|miR-1263|miR-1276|miR-1294|miR-1299|miR-1323|miR-137|miR-145-5p|miR-183-5p|miR-185-3p|miR-193a-3p|miR-193b-3p|miR-196a-5p|miR-196b-5p|miR-3065-5p|miR-3123|miR-3178|miR-3187-3p|miR-3188|miR-3613-3p|miR-3656|miR-3664-5p|miR-369-3p|miR-371b-3p|miR-374a-5p|miR-374b-5p|miR-3921|miR-4303|miR-4476|miR-4478|miR-4492|miR-4498|miR-4503|miR-4524b-3p|miR-4529-5p|miR-4533|miR-4653-5p|mi…	E2F7|ECT2|GTF3C2|MCM4|MSH6|NONO|PPP2R1B|RAE1|RFC5|SFRS1|TRAF4|UACA|WDR59|WHSC1|XPNPEP1|ZNF207|ZNF317	1.21	0.54	-0.47	0.67	0.82	0.88	0.88	1.2	2.22	0.68	0.55	0.59	1.58	4.23	4.54928	3.54051	4.75423	4.0064
A_22_P00012060		(NA)							-1.1	0.26	2.33	-1.37	0.74	0.8	0.8	1.09	2.22	0.3	4.92	1.76	4.55	3.93	3.17565	5.24057	4.13723	2.91347
ENSG00000249685		lincRNA	ENSG00000249685						-1.07	0.05	0.6	-1.12	0.72	0.78	0.78	1.06	2.22	0.05	0.91	1.4	1.34	3.08	3.07833	3.62814	2.55669	3.029
Hs.579438		(NA)							-0.92	0.33	0.86	-1.25	0.62	0.67	0.67	0.91	2.22	0.51	1.84	2	1.59	2.65	2.67426	3.20502	2.28578	2.34535
A_22_P00010459		(NA)							0.95	0.06	-0.09	0.89	0.64	0.69	0.69	0.94	2.22	0.07	0.1	1.2	1.64	2.79	2.627	2.47692	3.43183	2.56373
A_33_P3222761		(NA)							-1.04	-0.45	0.51	-0.59	0.7	0.76	0.76	1.03	2.22	0.65	0.77	0.61	1.66	2.72	2.39421	3.36132	2.32072	2.84807
A_22_P00023020		(NA)							-0.8	-0.22	0.3	-0.58	0.54	0.58	0.58	0.79	2.22	0.36	0.54	0.86	1.41	2.7	2.5948	3.11411	2.31369	2.81386
A_21_P0002508		(NA)							0.75	0.1	0.07	0.65	0.51	0.55	0.55	0.74	2.22	0.15	0.1	1.09	1.92	2.4	2.23762	2.20533	2.95754	2.13936
EFCAB6-AS1	EFCAB6 antisense RNA 1	asRNA							-1.25	0.63	1.95	-1.88	0.84	0.91	0.91	1.24	2.22	0.79	3.53	2.28	2.72	3.06	2.81758	4.14153	2.89148	2.18671
A_22_P00002040		(NA)							-0.91	-0.08	1.78	-0.83	0.61	0.66	0.66	0.9	2.21	0.09	4.51	1.16	4.59	9.52	8.75972	10.6142	9.70209	8.83863
SP9	Sp9 transcription factor	protein coding	ENSG00000217236	100131390					0.79	0.43	0.28	0.37	0.54	0.58	0.58	0.79	2.21	0.86	0.49	0.47	2.2	5.55	5.50061	5.3527	6.14595	5.0755
A_21_P0010421		(NA)							0.89	0.57	-0.26	0.32	0.6	0.65	0.65	0.88	2.21	1.1	0.38	0.34	1.79	4.16	4.48302	3.65251	4.54442	3.90992
LSS	lanosterol synthase (2,3-oxidosqualene-lanosterol cyclase)	protein coding	ENSG00000160285	4047	00100|01100	GO:0000250|GO:0005789|GO:0005811|GO:0006694|GO:0006695|GO:0016020|GO:0031647|GO:0044281	miR-1250-3p|miR-1273g-3p|miR-1299|miR-1537-3p|miR-1915-3p|miR-30a-3p|miR-30d-3p|miR-30e-3p|miR-370-3p|miR-3714|miR-4251|miR-4276|miR-4283|miR-4319|miR-4328|miR-4419a|miR-4441|miR-4463|miR-4519|miR-4722-3p|miR-500b-3p|miR-548c-3p|miR-6727-3p|miR-6764-5p|miR-6820-5p|miR-6836-3p|miR-6892-5p|miR-6893-3p|miR-875-3p|miR-9500	MBD1|POLDIP3|WDR1	-0.66	0.35	-0.2	-1	0.44	0.48	0.48	0.65	2.21	0.85	0.42	2.33	3.64	9.77	10.3143	9.76139	9.10466	9.96623
A_22_P00007867		(NA)							0.83	0.05	-0.38	0.78	0.56	0.6	0.6	0.82	2.21	0.07	0.69	1.2	1.33	2.56	2.57809	2.15013	2.97875	2.52583
OR51B5	olfactory receptor, family 51, subfamily B, member 5	protein coding	ENSG00000242180	282763	04740	GO:0005886		NLRP1	-0.96	0.24	1	-1.2	0.65	0.7	0.7	0.96	2.21	0.32	2.1	1.78	1.73	2.55	2.44762	3.20615	2.24373	2.20569
HHEX	hematopoietically expressed homeobox	protein coding	ENSG00000152804	3087	04950|05202	GO:0000122|GO:0000978|GO:0001078|GO:0005515|GO:0005634|GO:0005737|GO:0006406|GO:0008134|GO:0008190|GO:0008283|GO:0008301|GO:0009952|GO:0010621|GO:0010944|GO:0016525|GO:0016973|GO:0017025|GO:0030154|GO:0030177|GO:0030183|GO:0030948|GO:0032993|GO:0034504|GO:0042803|GO:0043565|GO:0044212|GO:0045736|GO:0045892|GO:0045944|GO:0070491|GO:0071103	miR-1233-5p|miR-129-5p|miR-146a-3p|miR-148a-3p|miR-148b-3p|miR-152-3p|miR-186-5p|miR-203a-3p|miR-301a-5p|miR-301b-5p|miR-3137|miR-3180-5p|miR-3187-3p|miR-34b-3p|miR-3921|miR-4297|miR-4464|miR-4524a-3p|miR-4653-5p|miR-466|miR-4716-3p|miR-4748|miR-4775|miR-4789-5p|miR-548ad-5p|miR-548ae-5p|miR-548ak|miR-548am-5p|miR-548aq-5p|miR-548ar-5p|miR-548au-5p|miR-548ay-5p|miR-548b-5p|miR-548bb-5p|miR-548c-5…		-1.52	0.63	2.89	-2.15	1.03	1.11	1.11	1.51	2.21	0.61	4.37	2.1	3.69	3.35	2.67787	4.93545	3.41126	2.04798
CCR10	chemokine (C-C motif) receptor 10	protein coding	ENSG00000184451	2826	04060|04062|04672	GO:0004930|GO:0005886|GO:0005887|GO:0009986	miR-124-3p|miR-2114-5p|miR-4255|miR-4708-3p|miR-506-3p|miR-596|miR-6809-5p		-1.13	-0.22	0.75	-0.92	0.77	0.83	0.83	1.13	2.2	0.23	1.14	0.98	1.52	6.81	6.5585	7.52531	6.39117	6.77372
SNORD114-11	small nucleolar RNA, C/D box 114-11	other ncRNA	ENSG00000200608	767589					-1.67	-0.21	1.31	-1.46	1.13	1.22	1.22	1.66	2.2	0.14	1.44	1.09	1.62	4.68	4.26948	5.79093	4.12484	4.47941
A_22_P00009748		(NA)							1.54	-0.56	-1.12	2.1	1.04	1.12	1.12	1.53	2.2	0.51	1.29	1.99	1.45	4.4	4.17213	3.61239	5.15167	4.73045
ZNF90	zinc finger protein 90	protein coding	ENSG00000213988	7643			let-7a-2-3p|let-7g-3p|miR-1208|miR-1228-3p|miR-1248|miR-142-3p|miR-146a-5p|miR-146b-5p|miR-154-5p|miR-183-3p|miR-216b-3p|miR-3145-3p|miR-3147|miR-3182|miR-323a-3p|miR-3591-5p|miR-3607-5p|miR-3668|miR-3689d|miR-3920|miR-3925-3p|miR-4259|miR-4266|miR-4443|miR-4461|miR-4478|miR-4483|miR-4505|miR-4695-5p|miR-4714-5p|miR-4753-3p|miR-4768-5p|miR-511-3p|miR-513c-5p|miR-514b-5p|miR-544a|miR-555|miR-5571-…		0.79	-0.53	-0.96	1.32	0.53	0.57	0.57	0.78	2.2	1.17	2.57	2.6	1.99	2.63	2.54038	2.11191	2.898	3.06967
Hs.664484		(NA)							1.27	-0.12	-0.9	1.39	0.86	0.92	0.92	1.26	2.2	0.11	1.25	1.49	1.38	3.23	3.28411	2.50944	3.77451	3.4072
A_21_P0003912		(NA)							-0.88	-0.4	0.36	-0.47	0.59	0.64	0.64	0.87	2.2	0.7	0.6	0.57	1.6	2.61	2.36111	3.12379	2.24736	2.76375
A_22_P00015368		(NA)							0.76	-0.04	-0.04	0.79	0.51	0.55	0.55	0.75	2.2	0.05	0.06	1.39	1.8	2.18	1.97173	1.96695	2.72397	2.00767
PCED1A	PC-esterase domain containing 1A	protein coding	ENSG00000132635	64773		GO:0005515	miR-1911-3p|miR-4755-3p|miR-5581-3p|miR-6872-3p|miR-6895-5p		1.15	-0.04	-1.21	1.19	0.78	0.85	0.85	1.15	2.19	0.04	2.11	1.37	1.91	3.53	3.8367	2.66661	3.81978	3.87839
DUSP5P1	dual specificity phosphatase 5 pseudogene 1	pseudogene							-1.59	0.57	0.88	-2.16	1.08	1.17	1.17	1.59	2.19	0.5	0.88	1.97	1.5	3.47	3.8434	4.14943	2.55635	3.27363
Hs.542528		(NA)							1.05	-0.32	-1.02	1.38	0.72	0.77	0.77	1.05	2.19	0.41	1.9	1.87	1.59	3.34	3.368	2.66843	3.72257	3.69051
A_33_P3318963		(NA)							0.91	-0.18	-0.16	1.09	0.62	0.67	0.67	0.91	2.19	0.23	0.21	1.66	1.76	3.31	3.02298	3.03919	3.95301	3.20015
A_21_P0012919		(NA)							0.85	0.04	0.02	0.81	0.57	0.62	0.62	0.84	2.19	0.04	0.02	1.23	1.85	2.67	2.45574	2.44025	3.28704	2.41974
A_22_P00009302		(NA)							0.9	-0.13	-0.13	1.02	0.61	0.66	0.66	0.9	2.19	0.16	0.16	1.55	1.74	2.47	2.20912	2.20868	3.1041	2.33429
ESYT3	extended synaptotagmin-like protein 3	protein coding	ENSG00000158220	83850		GO:0005515|GO:0005887|GO:0031227|GO:0031234|GO:0044232	miR-1193|miR-1261|miR-1277-5p|miR-1297|miR-190a-3p|miR-202-5p|miR-203a-3p|miR-219a-2-3p|miR-297|miR-29a-5p|miR-302c-5p|miR-3125|miR-3148|miR-340-5p|miR-3688-3p|miR-3916|miR-3924|miR-3937|miR-4262|miR-4291|miR-4423-3p|miR-4464|miR-4471|miR-4505|miR-4666a-3p|miR-4709-5p|miR-4731-3p|miR-4748|miR-4762-3p|miR-4765|miR-4776-3p|miR-4801|miR-5011-5p|miR-514a-5p|miR-5582-3p|miR-5582-5p|miR-5702|miR-5787|m…		0.84	0.27	0.06	0.57	0.57	0.62	0.62	0.84	2.19	0.43	0.07	0.77	1.73	2.36	2.30696	2.09471	2.93772	2.03791
ARHGAP31-AS1	ARHGAP31 antisense RNA 1	asRNA	ENSG00000241155	100874246					-0.76	0.28	0.98	-1.04	0.52	0.56	0.56	0.76	2.19	0.52	2.76	1.99	2.13	2.35	2.23225	2.9343	2.17377	1.95093
A_33_P3331776		(NA)							-1.1	1.62	1.52	-2.72	0.75	0.81	0.81	1.1	2.19	3.22	2.99	4.12	3.08	3.44	4.10839	4.01511	2.91107	2.49183
CSF1R	colony stimulating factor 1 receptor	protein coding	ENSG00000182578	1436	04014|04015|04060|04144|04151|04380|04640|05200|05202	GO:0001934|GO:0005011|GO:0005886|GO:0005887|GO:0006954|GO:0007165|GO:0007169|GO:0007275|GO:0008283|GO:0008284|GO:0008360|GO:0009986|GO:0018108|GO:0019221|GO:0019955|GO:0030097|GO:0030224|GO:0030225|GO:0030316|GO:0030335|GO:0031529|GO:0036006|GO:0038145|GO:0042517|GO:0042803|GO:0045124|GO:0045217|GO:0046488|GO:0046777|GO:0048015|GO:0060603|GO:0061098|GO:0070374|GO:0071345|GO:0071902|GO:0090197|GO:…	miR-1273h-5p|miR-1275|miR-149-3p|miR-155-5p|miR-22-3p|miR-3194-5p|miR-34a-5p|miR-34c-5p|miR-3714|miR-3934-3p|miR-4323|miR-4436b-3p|miR-4450|miR-4487|miR-449a|miR-449b-5p|miR-4632-5p|miR-4677-3p|miR-4728-5p|miR-4802-5p|miR-5702|miR-629-3p|miR-6735-5p|miR-6778-5p|miR-6785-5p|miR-6868-5p|miR-6877-5p|miR-6879-5p|miR-6883-5p|miR-765|miR-7843-5p		1.59	-0.78	-1.19	2.37	1.08	1.17	1.17	1.59	2.18	0.76	1.33	2.22	1.55	4.23	3.86958	3.46233	5.0514	4.65328
SYS1	Sys1 golgi trafficking protein	protein coding	ENSG00000204070	90196			miR-126-5p|miR-1289|miR-130a-5p|miR-1324|miR-138-5p|miR-140-3p|miR-15a-5p|miR-15b-5p|miR-16-5p|miR-1915-3p|miR-195-5p|miR-196a-3p|miR-214-3p|miR-216a-5p|miR-218-1-3p|miR-23a-3p|miR-23b-3p|miR-23c|miR-3191-5p|miR-326|miR-330-5p|miR-3619-5p|miR-362-5p|miR-370-5p|miR-3714|miR-3928-3p|miR-421|miR-424-5p|miR-4258|miR-4291|miR-4299|miR-4303|miR-4438|miR-4446-3p|miR-4474-3p|miR-4524b-3p|miR-4533|miR-466…		0.81	0.63	-0.51	0.18	0.55	0.6	0.6	0.81	2.18	1.41	1.06	0.19	2.5	6.64	7.16461	6.02024	6.82949	6.53358
SEMA4A	sema domain, immunoglobulin domain (Ig), transmembrane domain (TM) and short cytoplasmic domain, (semaphorin) 4A	protein coding	ENSG00000196189	64218	04360	GO:0005515|GO:0005886|GO:0007411	miR-1321|miR-1343-3p|miR-1913|miR-218-5p|miR-24-3p|miR-301a-5p|miR-301b-5p|miR-3154|miR-3175|miR-3192-5p|miR-324-3p|miR-335-3p|miR-4292|miR-4328|miR-4436b-3p|miR-451b|miR-4632-5p|miR-4685-5p|miR-4723-5p|miR-4733-5p|miR-4739|miR-4756-5p|miR-5094|miR-5187-3p|miR-5588-3p|miR-5698|miR-593-3p|miR-617|miR-636|miR-651-3p|miR-6735-5p|miR-6783-3p|miR-6788-5p|miR-6791-5p|miR-6801-5p|miR-6837-5p|miR-6870-5p…		0.92	-0.62	-0.53	1.55	0.63	0.68	0.68	0.93	2.18	1.16	0.94	2.58	1.94	3.42	2.99995	3.08833	4.01245	3.6231
A_24_P235783		(NA)							-1.16	-0.84	1.04	-0.32	0.79	0.86	0.86	1.17	2.18	1.27	1.7	0.25	2.93	4.86	3.99583	5.87961	4.7153	4.83591
ZFPM2-AS1	ZFPM2 antisense RNA 1	asRNA							-0.9	-0.59	-0.06	-0.31	0.61	0.66	0.66	0.9	2.18	1.11	0.07	0.32	1.8	4.4	4.24523	4.77327	3.8725	4.83674
Hs.667880		(NA)							-0.95	0.26	0.59	-1.21	0.65	0.7	0.7	0.96	2.18	0.35	1.04	1.8	1.38	2.93	3.06035	3.39238	2.43998	2.79913
ENSG00000248764		asRNA	ENSG00000248764						-0.71	-0.48	0.16	-0.23	0.49	0.52	0.52	0.71	2.18	1.16	0.27	0.3	1.77	2.73	2.48067	3.11922	2.40745	2.96295
CRB3	crumbs family member 3	protein coding	ENSG00000130545	92359	04530	GO:0005515|GO:0005886|GO:0017124|GO:0019904|GO:0030054|GO:0034329|GO:0045216|GO:0070062|GO:0070830|GO:0072659	miR-1277-5p|miR-1289|miR-2861|miR-3609|miR-4766-5p|miR-5011-5p|miR-548ah-5p|miR-548az-5p|miR-548t-5p|miR-660-3p|miR-6838-3p|miR-6890-3p|miR-7515|miR-939-3p	EPS8L2|TACSTD1	-1.42	0.3	1.21	-1.72	0.97	1.05	1.05	1.43	2.18	0.25	1.59	1.67	1.46	2.48	2.42799	3.3448	1.91983	2.12991
PRAMEF20	PRAME family member 20	protein coding	ENSG00000204478	645425					0.86	0.14	-0.56	0.73	0.59	0.63	0.63	0.86	2.18	0.18	1.1	1.03	1.46	2.46	2.62763	1.92874	2.79232	2.49023
A_21_P0011084		(NA)							0.9	0.28	0.16	0.61	0.61	0.66	0.66	0.9	2.18	0.42	0.21	0.78	1.92	2.42	2.30653	2.18303	3.07859	2.02586
A_22_P00000397		(NA)							0.77	0.47	-0.14	0.31	0.53	0.57	0.57	0.77	2.18	0.99	0.22	0.38	1.67	2.41	2.62022	2.00974	2.78262	2.15435
A_22_P00015293		(NA)							0.7	-0.01	-0.24	0.71	0.48	0.52	0.52	0.7	2.18	0.01	0.48	1.32	1.36	2.39	2.32702	2.09383	2.79327	2.33731
A_33_P3302676		(NA)							-1.51	0.51	1.63	-2.02	1.03	1.03	1.03	1.45	2.18	0.51	2.4	2.03	1.87	3.13	2.99867	4.11922	2.6065	2.48895
Hs.594912		(NA)							-1.25	0.81	1.93	-2.06	0.85	0.92	0.92	1.26	2.18	1.08	3.41	2.52	2.54	3.28	3.17696	4.30255	3.04886	2.36995
PDZD7	PDZ domain containing 7	protein coding	ENSG00000186862	79955		GO:0005515|GO:0005615|GO:0005634|GO:0005929	miR-1303|miR-30c-1-3p|miR-30c-2-3p|miR-4259|miR-4435|miR-4437|miR-6788-5p|miR-6807-5p|miR-887-5p		-0.76	-0.04	1.92	-0.72	0.52	0.56	0.56	0.76	2.17	0.05	5.81	1.21	6.05	13.52	12.6726	14.6325	13.8743	12.7078
LEPR	leptin receptor	protein coding	ENSG00000116678	3953	04060|04080|04152|04630|04920|04932	GO:0004888|GO:0005515|GO:0005886|GO:0006112|GO:0007166|GO:0007275|GO:0010507|GO:0019953|GO:0030217|GO:0033210|GO:0038021|GO:0042593|GO:0042802|GO:0043235|GO:0044321|GO:0046850|GO:0060259|GO:0097009|GO:0098868|GO:2000505		DAB2|NOLC1|RAE1|TAF5	-0.81	-0.09	1.51	-0.71	0.55	0.6	0.6	0.81	2.17	0.13	4.25	1.09	4.35	12	11.3427	12.9471	12.1401	11.4351
A_22_P00014812		(NA)							0.79	-0.26	0.86	1.04	0.54	0.58	0.58	0.79	2.17	0.44	2.21	1.88	5.34	9.7	8.8384	9.95761	10.7455	9.09431
RPA2	replication protein A2, 32kDa	protein coding	ENSG00000117748	6118	03030|03420|03430|03440|03460	GO:0000082|GO:0000278|GO:0000722|GO:0000723|GO:0000724|GO:0000784|GO:0000785|GO:0003684|GO:0003697|GO:0005515|GO:0005634|GO:0005654|GO:0005662|GO:0006260|GO:0006271|GO:0006281|GO:0006283|GO:0006284|GO:0006289|GO:0006297|GO:0006298|GO:0006302|GO:0010569|GO:0016605|GO:0019899|GO:0019903|GO:0019985|GO:0031571|GO:0031625|GO:0032201|GO:0033683|GO:0034605|GO:0036297|GO:0042276|GO:0042769|GO:0070911|GO:…	let-7c-3p|miR-106a-5p|miR-106b-5p|miR-130a-3p|miR-130b-3p|miR-17-5p|miR-1910-3p|miR-20a-5p|miR-20b-5p|miR-301a-3p|miR-301b-3p|miR-331-3p|miR-3666|miR-4295|miR-4487|miR-452-5p|miR-454-3p|miR-4676-3p|miR-519a-3p|miR-519b-3p|miR-519c-3p|miR-519d-3p|miR-526b-3p|miR-5580-3p|miR-592|miR-6165|miR-657|miR-892c-3p|miR-93-5p|miR-943		0.9	0.72	-0.11	0.18	0.62	0.67	0.67	0.91	2.17	1.46	0.14	0.16	1.92	8.25	8.59585	7.76195	8.66216	7.87176
CNKSR3	CNKSR family member 3	protein coding	ENSG00000153721	154043		GO:0005515|GO:0010765|GO:0033137|GO:0070373	let-7a-3p|let-7b-3p|let-7f-1-3p|miR-124-3p|miR-154-3p|miR-181a-5p|miR-181b-5p|miR-181c-5p|miR-181d-5p|miR-3119|miR-3145-3p|miR-3146|miR-3177-5p|miR-3185|miR-3591-3p|miR-3929|miR-3942-3p|miR-4262|miR-4419b|miR-4424|miR-4446-5p|miR-4478|miR-449c-3p|miR-454-5p|miR-4698|miR-4749-3p|miR-4755-5p|miR-4776-5p|miR-485-5p|miR-487a-3p|miR-5003-3p|miR-5006-3p|miR-506-3p|miR-548c-3p|miR-548e-5p|miR-551b-5p|mi…		-1.52	-0.08	-0.76	-1.44	1.04	1.13	1.13	1.53	2.17	0.05	0.77	1.2	2.99	6.64	7.39713	6.71359	5.19047	7.47723
A_24_P83379		(NA)							-0.9	-0.07	1.06	-0.83	0.62	0.67	0.67	0.91	2.17	0.08	2.41	1.15	2.31	5.62	5.24105	6.369	5.4655	5.31221
A_33_P3334292		(NA)							-1.19	0.15	2.61	-1.33	0.81	0.87	0.87	1.19	2.17	0.14	5.06	1.51	4.9	4.97	4.00271	6.46546	5.2802	3.85639
FAM86C2P	family with sequence similarity 86, member C2, pseudogene	pseudogene	ENSG00000160172	645332					1.25	0.11	-0.85	1.15	0.86	0.93	0.93	1.26	2.17	0.09	1.15	1.14	1.41	3.63	3.82601	2.8702	4.12473	3.71822
LINC00317	lincRNA 317	lincRNA	ENSG00000238265	378828					-1.26	-0.39	0.36	-0.88	0.86	0.93	0.93	1.27	2.17	0.41	0.37	0.78	1.39	3.54	3.40154	4.14709	2.88245	3.79039
A_22_P00021082		(NA)							-1.08	-0.21	0.66	-0.87	0.74	0.8	0.8	1.09	2.17	0.23	1	0.96	1.43	3.05	2.83359	3.70511	2.62197	3.04284
PAEP	progestagen-associated endometrial protein	protein coding	ENSG00000122133	5047		GO:0005515|GO:0006915|GO:0007275|GO:0032725|GO:2000667|GO:2000778	miR-3911|miR-4303|miR-4436b-3p|miR-6721-5p		-0.96	0.44	1.01	-1.41	0.66	0.71	0.71	0.97	2.17	0.69	2.09	2.14	1.68	2.97	3.01437	3.58242	2.61946	2.57105
GAS2L2	growth arrest-specific 2 like 2	protein coding	ENSG00000270765	246176		GO:0001578|GO:0005737|GO:0007026|GO:0008017|GO:0008093|GO:0051015	miR-199a-5p|miR-199b-5p|miR-2278|miR-4253|miR-4261|miR-4294|miR-5192|miR-541-3p|miR-654-5p|miR-6871-5p		-1.04	0.71	1.38	-1.76	0.71	0.77	0.77	1.05	2.17	1.18	2.83	2.59	2.12	3.06	3.11924	3.78792	2.74562	2.40488
CHRM3-AS1	CHRM3 antisense RNA 1	asRNA	ENSG00000234601	100873984					0.81	0.32	-0.27	0.49	0.55	0.6	0.6	0.81	2.17	0.56	0.45	0.66	1.45	2.34	2.50089	1.91392	2.72263	2.18338
VWF	von Willebrand factor	protein coding	ENSG00000110799	7450	04151|04510|04512|04610|04611	GO:0001948|GO:0002020|GO:0002576|GO:0005178|GO:0005515|GO:0005518|GO:0005576|GO:0005783|GO:0007155|GO:0007596|GO:0007597|GO:0007599|GO:0009611|GO:0019865|GO:0030168|GO:0030198|GO:0031012|GO:0031093|GO:0031589|GO:0033093|GO:0042802|GO:0042803|GO:0047485|GO:0051087|GO:0051260|GO:0070062	miR-383-3p|miR-4265|miR-4296|miR-4322	BCL6B|DNM3|EPAS1|ERG|FGD5|NIPA1|ZBTB16	2.61	-1.11	2.63	3.72	1.79	1.93	1.93	2.64	2.16	0.61	1.97	2.07	5.26	5.51	2.59675	6.33069	8.94244	3.70422
ZSCAN18	zinc finger and SCAN domain containing 18	protein coding	ENSG00000121413	65982			miR-1178-3p|miR-1262|miR-3176|miR-3922-3p|miR-4492|miR-4701-3p|miR-6727-5p|miR-6736-5p|miR-6814-5p|miR-7977		-1.27	-0.35	-0.08	-0.92	0.88	0.95	0.95	1.29	2.16	0.35	0.06	0.83	1.7	8.55	8.67439	8.94869	7.67391	9.02561
HACD2	3-hydroxyacyl-CoA dehydratase 2	protein coding	ENSG00000206527	201562	00062|01040|01212	GO:0005515|GO:0005783|GO:0005789|GO:0018812|GO:0019432|GO:0019899|GO:0030148|GO:0030497|GO:0035338|GO:0042761|GO:0044255|GO:0044281	miR-103a-3p|miR-107|miR-1184|miR-1197|miR-1243|miR-1276|miR-1290|miR-1297|miR-153-5p|miR-193a-3p|miR-193b-3p|miR-204-5p|miR-211-5p|miR-2116-5p|miR-216a-5p|miR-26a-5p|miR-26b-5p|miR-3163|miR-3190-5p|miR-3613-3p|miR-3646|miR-371b-5p|miR-373-5p|miR-378j|miR-379-3p|miR-411-3p|miR-4310|miR-4435|miR-4465|miR-4471|miR-4494|miR-4501|miR-4728-3p|miR-5584-3p|miR-561-3p|miR-605-5p|miR-609|miR-616-5p|miR-675…		0.88	0.61	0.4	0.27	0.6	0.65	0.65	0.89	2.16	1.18	0.67	0.28	2.33	8.05	8.05024	7.84498	8.72597	7.44345
Hs.720720		(NA)							-0.8	0.14	1.32	-0.94	0.55	0.59	0.59	0.81	2.16	0.2	3.64	1.6	3.19	6.89	6.50223	7.6783	6.87697	6.36243
AP4B1	adaptor-related protein complex 4, beta 1 subunit	protein coding	ENSG00000134262	10717	04142	GO:0005215|GO:0005515|GO:0005802|GO:0006892|GO:0031904|GO:0032588|GO:0061024	miR-181b-2-3p|miR-181b-3p|miR-192-3p|miR-378b|miR-3926|miR-4420|miR-4660|miR-488-3p|miR-548s|miR-5684		0.74	-0.02	-0.22	0.76	0.51	0.55	0.55	0.74	2.16	0.03	0.4	1.34	1.39	6.84	6.74945	6.54987	7.28735	6.77353
LOC101928973	uncharacterized LOC101928973	lincRNA	ENSG00000237292	101928973					0.79	-0.08	-0.29	0.86	0.54	0.58	0.58	0.8	2.16	0.11	0.51	1.46	1.37	6.64	6.52811	6.31461	7.10155	6.60585
A_33_P3275959		(NA)							-1.28	-0.08	2.14	-1.19	0.87	0.87	0.87	1.23	2.16	0.07	4.05	1.25	4	6.49	5.63791	7.86365	6.5873	5.71982
SHMT1	serine hydroxymethyltransferase 1 (soluble)	protein coding	ENSG00000176974	6470	00260|00460|00630|00670|01100|01200|01230	GO:0004372|GO:0005515|GO:0005634|GO:0005737|GO:0005829|GO:0006544|GO:0006563|GO:0006565|GO:0006766|GO:0006767|GO:0009083|GO:0009113|GO:0030170|GO:0034641|GO:0035999|GO:0042803|GO:0044281|GO:0045329|GO:0046653|GO:0046655|GO:0051262|GO:0051289|GO:0070062|GO:0070905|GO:1904482	miR-1273a|miR-1915-3p|miR-218-5p|miR-3611|miR-3658|miR-384|miR-4419a|miR-4447|miR-486-3p|miR-500a-5p|miR-607|miR-6507-3p|miR-6764-5p|miR-6805-5p|miR-9-3p	C20orf11|DDX31|E2F4|EZH1|IQSEC2|LGALS14|NLRP1|PHLPPL|RANBP1|RNF170|RNF32|RUVBL2|SOX4|SSRP1|TCF20|WDR79|ZNF645	1.26	1.25	-1.04	0.01	0.86	0.93	0.93	1.27	2.16	1.93	1.52	0	3.41	5.46	6.59642	4.30133	5.56061	5.34584
U2AF1L4	U2 small nuclear RNA auxiliary factor 1-like 4	protein coding	ENSG00000161265	199746	03040|05131				-1.29	0	0.28	-1.29	0.89	0.96	0.96	1.31	2.16	0	0.27	1.28	1.45	4.69	4.87892	5.16298	3.87051	4.88016
PTGR2	prostaglandin reductase 2	protein coding	ENSG00000140043	145482		GO:0006693|GO:0047522|GO:0070062	miR-1277-5p|miR-1303|miR-145-5p|miR-1468-3p|miR-182-5p|miR-190a-3p|miR-302e|miR-3170|miR-3184-3p|miR-335-5p|miR-3618|miR-3658|miR-424-3p|miR-4328|miR-4482-3p|miR-4495|miR-4694-3p|miR-4775|miR-4801|miR-5011-5p|miR-504-3p|miR-5095|miR-5100|miR-518c-5p|miR-5195-3p|miR-548a-5p|miR-548ab|miR-548ac|miR-548ad-5p|miR-548ae-5p|miR-548ak|miR-548am-5p|miR-548ap-5p|miR-548aq-5p|miR-548ar-5p|miR-548as-5p|miR-…		1.18	0.75	-1.08	0.43	0.81	0.87	0.87	1.19	2.16	1.06	1.74	0.34	2.76	4.08	4.8935	3.06525	4.24253	4.14336
Hs.687756		(NA)							0.8	-0.1	-0.62	0.9	0.55	0.6	0.6	0.81	2.16	0.14	1.38	1.51	1.39	2.68	2.72043	2.19982	3.00259	2.82218
ENSG00000253130		lincRNA	ENSG00000253130						1.05	0.48	-0.28	0.57	0.72	0.78	0.78	1.06	2.16	0.67	0.35	0.57	1.49	2.41	2.63356	1.87327	2.91866	2.15668
LOC100506331	uncharacterized LOC100506331	other ncRNA							-0.73	0.22	0.32	-0.95	0.5	0.54	0.54	0.73	2.16	0.4	0.64	1.85	1.51	2.35	2.53673	2.62975	1.90462	2.31429
SSR3	signal sequence receptor, gamma (translocon-associated protein gamma)	protein coding	ENSG00000114850	6747	04141	GO:0006412|GO:0006614|GO:0010467|GO:0044267	miR-1-5p|miR-1178-3p|miR-1207-5p|miR-1226-3p|miR-1252-5p|miR-130a-5p|miR-137|miR-140-3p|miR-154-3p|miR-1972|miR-200b-3p|miR-200c-3p|miR-204-5p|miR-205-3p|miR-2054|miR-211-5p|miR-23a-3p|miR-23b-3p|miR-23c|miR-30a-3p|miR-30d-3p|miR-30e-3p|miR-342-3p|miR-34b-3p|miR-3613-3p|miR-3620-3p|miR-3646|miR-3653-3p|miR-3658|miR-3660|miR-3662|miR-3681-5p|miR-371b-5p|miR-373-5p|miR-382-5p|miR-3919|miR-4261|miR-…		0.88	0.03	-0.16	0.85	0.6	0.65	0.65	0.89	2.15	0.04	0.21	1.22	1.48	7.16	7.03075	6.84335	7.72146	6.99978
HOXC4	homeobox C4	protein coding	ENSG00000198353	3221		GO:0005515|GO:0005634	miR-1207-5p|miR-1228-3p|miR-1255a|miR-1255b-5p|miR-1277-5p|miR-1297|miR-1301-3p|miR-146a-3p|miR-149-3p|miR-185-5p|miR-1909-3p|miR-190a-3p|miR-194-3p|miR-203b-3p|miR-208a-5p|miR-208b-5p|miR-26a-5p|miR-26b-5p|miR-29b-1-5p|miR-3124-3p|miR-3129-3p|miR-3133|miR-3150b-3p|miR-3183|miR-3200-3p|miR-331-3p|miR-4253|miR-4268|miR-4273|miR-4288|miR-4306|miR-4447|miR-4465|miR-4472|miR-4475|miR-4511|miR-4530|mi…		1.8	-0.11	-3.44	1.9	1.24	1.34	1.34	1.82	2.15	0.06	4.32	1.38	4.14	6.88	8.16279	4.82754	6.62324	8.26833
MED10	mediator complex subunit 10	protein coding	ENSG00000133398	84246		GO:0005515|GO:0005654|GO:0006367|GO:0010467	miR-1-5p|miR-1255b-2-3p|miR-146a-3p|miR-185-3p|miR-214-3p|miR-3619-5p|miR-3927-3p|miR-4279|miR-4495|miR-4773|miR-5591-3p|miR-567|miR-570-3p|miR-6831-5p|miR-761|miR-7975|miR-935	ABT1|PSMD13|PWP1|SYNCRIP|THOC4	0.61	0	-0.92	0.6	0.42	0.45	0.45	0.61	2.15	0.01	3.3	1.27	3.1	6.85	7.17627	6.25545	6.86126	7.17279
A_22_P00024059		(NA)							0.73	0.08	-0.45	0.65	0.51	0.55	0.55	0.74	2.15	0.12	1.01	1.09	1.35	6.79	6.89509	6.36351	7.09659	6.81522
A_22_P00005720		(NA)							-0.97	-0.23	2.03	-0.74	0.67	0.72	0.72	0.99	2.15	0.3	4.75	0.88	5.14	6.78	5.78793	8.0551	7.08134	6.02216
A_33_P3419594		(NA)							1.02	-0.18	-1.06	1.2	0.7	0.76	0.76	1.03	2.15	0.21	2.05	1.6	1.71	6.7	6.86502	5.98648	7.00563	7.04872
A_24_P101812		(NA)							0.84	-0.79	-0.91	1.62	0.58	0.62	0.62	0.85	2.15	1.77	2.14	3.05	2.09	2.68	2.3615	2.24169	3.08078	3.14719
LOC101929634	keratin-associated protein 5-1-like	lincRNA	ENSG00000260792	101929634					-1.07	-0.19	1.51	-0.88	0.74	0.79	0.79	1.08	2.15	0.21	3.03	0.98	3.1	5.23	4.57115	6.27158	5.20182	4.764
STMND1	stathmin domain containing 1	protein coding	ENSG00000230873	401236			miR-124-3p|miR-1271-5p|miR-1909-5p|miR-2467-3p|miR-3150a-3p|miR-3160-5p|miR-3167|miR-3175|miR-3919|miR-4258|miR-506-3p|miR-5581-3p|miR-6763-5p|miR-6878-5p|miR-7843-3p|miR-876-5p|miR-96-5p		-0.85	0.06	0.66	-0.9	0.58	0.63	0.63	0.86	2.15	0.07	1.38	1.39	1.4	4.47	4.38497	4.98849	4.14145	4.32888
LSR	lipolysis stimulated lipoprotein receptor	protein coding	ENSG00000105699	51599		GO:0001889|GO:0005886|GO:0070062	miR-4728-5p|miR-8070	EPS8L2	1.1	-0.13	-1.82	1.23	0.76	0.82	0.82	1.12	2.15	0.12	3.66	1.48	3.3	3.86	4.44917	2.75124	3.85345	4.5746
TYW5	tRNA-yW synthesizing protein 5	protein coding	ENSG00000162971	129450		GO:0000049|GO:0005506|GO:0005737|GO:0006400|GO:0008033|GO:0010467|GO:0016706|GO:0031591|GO:0042803	miR-1200|miR-1224-3p|miR-1273g-5p|miR-1275|miR-130b-5p|miR-18a-3p|miR-2116-5p|miR-296-5p|miR-31-5p|miR-3124-3p|miR-3144-3p|miR-3148|miR-3162-5p|miR-3194-3p|miR-3194-5p|miR-3201|miR-331-5p|miR-3607-3p|miR-3671|miR-3686|miR-3691-3p|miR-3915|miR-4263|miR-4276|miR-4425|miR-4435|miR-4436a|miR-4443|miR-4451|miR-4482-3p|miR-4495|miR-4503|miR-452-5p|miR-4667-5p|miR-4676-3p|miR-4699-3p|miR-4700-3p|miR-470…		-0.96	-0.81	-0.45	-0.15	0.66	0.72	0.72	0.98	2.15	1.53	0.69	0.13	2.36	3.35	3.25351	3.6128	2.64882	4.06252
A_21_P0004423		(NA)							-1.17	0.31	0.72	-1.49	0.81	0.87	0.87	1.19	2.15	0.34	1.01	1.76	1.35	3.32	3.47772	3.88646	2.71432	3.16373
A_22_P00010303		(NA)							-0.84	-0.99	-0.28	0.15	0.58	0.62	0.62	0.85	2.15	2.41	0.44	0.15	2.53	2.91	2.55138	3.26329	2.42406	3.5418
A_22_P00001542		(NA)							0.76	0.23	-0.54	0.53	0.53	0.57	0.57	0.77	2.15	0.4	1.22	0.78	1.67	2.57	2.82593	2.0527	2.81647	2.5939
A_21_P0005544		(NA)							-1.02	0.25	0.83	-1.27	0.7	0.76	0.76	1.03	2.15	0.31	1.48	1.73	1.41	2.48	2.49434	3.07156	2.05449	2.24055
NXPE1	neurexophilin and PC-esterase domain family, member 1	protein coding	ENSG00000095110	120400			miR-1911-3p|miR-218-1-3p|miR-3119|miR-3622b-5p|miR-3678-3p|miR-4654|miR-4769-5p|miR-5089-5p|miR-5582-3p		0.97	0.53	-0.19	0.44	0.67	0.72	0.72	0.98	2.15	0.86	0.23	0.45	1.57	2.45	2.683	1.96615	2.93819	2.15153
MALAT1	metastasis associated lung adenocarcinoma transcript 1 (non-protein coding)	lincRNA	ENSG00000251562	378938				ANKRD12|CHD9|CLIP1	-1.05	-1.01	1.3	-0.04	0.72	0.78	0.78	1.06	2.14	1.84	2.56	0.03	4.31	10.88	9.72316	12.0308	10.9841	10.7321
A_24_P24972		(NA)							-0.66	-0.25	-1.08	-0.41	0.45	0.49	0.49	0.67	2.14	0.53	3.63	0.66	5.69	8.26	8.8303	7.9991	7.34156	9.08268
Hs.735628		(NA)							-1.37	-0.34	2.84	-1.03	0.94	1.02	1.02	1.39	2.14	0.31	4.7	0.86	5.1	7.46	6.05522	9.23793	7.86834	6.39832
OPLAH	5-oxoprolinase (ATP-hydrolysing)	protein coding	ENSG00000178814	26873	00480	GO:0005829|GO:0006750|GO:0006805|GO:0017168|GO:0044281|GO:1901687			-1.17	-0.65	-1.06	-0.52	0.81	0.87	0.87	1.19	2.14	0.87	1.7	0.43	3.47	6.61	7.00574	6.59577	5.42843	7.65416
Hs.744591		(NA)							0.97	-0.13	-0.22	1.1	0.67	0.73	0.73	0.99	2.14	0.15	0.28	1.51	1.54	5.64	5.41039	5.31376	6.28794	5.53794
Hs.663903		(NA)							-1.02	-0.12	1.71	-0.89	0.7	0.76	0.76	1.03	2.14	0.13	3.7	1.06	3.74	5.6	4.87368	6.70275	5.68653	4.99669
DSP	desmoplakin	protein coding	ENSG00000096696	1832	05412	GO:0001533|GO:0002934|GO:0003223|GO:0005080|GO:0005198|GO:0005200|GO:0005515|GO:0005634|GO:0005886|GO:0006915|GO:0006921|GO:0008544|GO:0012501|GO:0014704|GO:0018149|GO:0030216|GO:0030674|GO:0044822|GO:0045109|GO:0070062|GO:0071896|GO:0086073|GO:0086083|GO:0086091|GO:0097110|GO:0098911	miR-149-3p|miR-2115-5p|miR-2276-3p|miR-30a-5p|miR-30b-5p|miR-30c-5p|miR-30d-5p|miR-30e-5p|miR-3115|miR-3684|miR-3688-3p|miR-4482-3p|miR-4509|miR-4728-5p|miR-4760-3p|miR-4796-3p|miR-513a-5p|miR-515-5p|miR-548av-5p|miR-548g-3p|miR-548k|miR-561-3p|miR-5695|miR-610|miR-627-3p|miR-6715a-3p|miR-6758-3p|miR-6785-5p|miR-6883-5p|miR-8054|miR-8076	KRT8|PPP1R13L	-1.88	-1.32	3.45	-0.56	1.3	1.4	1.4	1.91	2.14	1.19	4.11	0.27	5.29	5.02	2.71638	7.48084	5.60193	4.03294
SERPINB9	serpin peptidase inhibitor, clade B (ovalbumin), member 9	protein coding	ENSG00000170542	5272	05146	GO:0002020|GO:0004867|GO:0005515|GO:0005615|GO:0005622|GO:0005634|GO:0005737|GO:0005829|GO:0006915|GO:0006955|GO:0009617|GO:0010628|GO:0010951|GO:0016020|GO:0033668|GO:0042270|GO:0043027|GO:0043066|GO:0043154|GO:0070062	let-7a-5p|let-7b-5p|let-7c-5p|let-7d-5p|let-7e-5p|let-7f-5p|let-7g-5p|let-7i-5p|miR-1208|miR-1226-5p|miR-1238-5p|miR-1269a|miR-1269b|miR-1273e|miR-1273h-5p|miR-1288-3p|miR-1323|miR-1827|miR-197-3p|miR-219b-3p|miR-296-3p|miR-300|miR-30b-3p|miR-3163|miR-3187-3p|miR-3617-5p|miR-3689a-3p|miR-3689b-3p|miR-3689c|miR-371b-5p|miR-373-5p|miR-374c-5p|miR-376b-5p|miR-376c-5p|miR-381-3p|miR-3915|miR-3920|miR…		1.55	0.29	-0.59	1.26	1.07	1.16	1.16	1.58	2.14	0.22	0.53	0.95	1.3	4.84	4.95945	4.07438	5.62546	4.6657
NCAM2	neural cell adhesion molecule 2	protein coding	ENSG00000154654	4685	04514|05020	GO:0007158	miR-1179|miR-1226-5p|miR-1252-3p|miR-1257|miR-127-5p|miR-1277-5p|miR-1279|miR-1297|miR-149-5p|miR-150-5p|miR-152-5p|miR-153-3p|miR-16-2-3p|miR-183-5p|miR-195-3p|miR-2116-5p|miR-224-3p|miR-26b-3p|miR-297|miR-3065-5p|miR-3121-3p|miR-3129-3p|miR-3177-5p|miR-3201|miR-328-3p|miR-340-5p|miR-3529-3p|miR-3616-3p|miR-3658|miR-3662|miR-374a-5p|miR-3924|miR-3974|miR-3977|miR-409-3p|miR-410-3p|miR-4264|miR-4…		2.11	0.43	0.67	1.68	1.46	1.58	1.58	2.15	2.14	0.24	0.42	0.93	2.26	4.71	4.10405	4.34175	6.45381	3.67516
NRG1	neuregulin 1	protein coding					miR-1276|miR-1468-5p|miR-3065-5p|miR-3148|miR-3668|miR-4272|miR-4310|miR-452-3p|miR-4736|miR-4760-3p|miR-485-3p|miR-491-3p|miR-497-3p|miR-539-3p|miR-942-3p	ATAD3B|BRD4|LBX1|MBD6|MYST3|NKX6-1|PAX5|PDLIM4|POLL|RBM17|REXO1|RGS6|SARDH|SCT|SPDEF|TNPO2|TRIM5|ZC3H7B|ZNF286A|ZNF423	-1.55	-0.04	2.39	-1.51	1.07	1.15	1.15	1.57	2.14	0.02	3.36	1.23	3.19	4.33	3.44674	5.86895	4.32082	3.48324
AP1G2	adaptor-related protein complex 1, gamma 2 subunit	protein coding	ENSG00000213983	8906	04142	GO:0000139|GO:0005515|GO:0005794|GO:0005798|GO:0006892|GO:0016020|GO:0030121|GO:0030133|GO:0061024	miR-1227-5p|miR-1233-5p|miR-30c-2-3p|miR-3122|miR-3913-5p|miR-4492|miR-4516|miR-4687-5p|miR-6740-5p|miR-6778-5p		0.86	-0.4	-1.83	1.26	0.6	0.64	0.64	0.88	2.14	0.67	4.79	2.11	4.14	4	4.4529	3.02331	3.88602	4.84865
Hs.197071		(NA)							-1.35	0.24	1.27	-1.6	0.94	1.01	1.01	1.38	2.14	0.21	1.77	1.59	1.54	3.23	3.09384	4.12206	2.76933	2.85144
PTPN22	protein tyrosine phosphatase, non-receptor type 22 (lymphoid)	protein coding	ENSG00000134242	26191		GO:0004725|GO:0005515|GO:0005634|GO:0005737|GO:0006470|GO:0009898|GO:0010507|GO:0010628|GO:0010629|GO:0016791|GO:0017124|GO:0019900|GO:0030217|GO:0031625|GO:0031663|GO:0032481|GO:0032496|GO:0032720|GO:0032817|GO:0034141|GO:0034145|GO:0035335|GO:0035644|GO:0043508|GO:0045088|GO:0048471|GO:0050860|GO:0050868|GO:0070374|GO:0070433|GO:0071225|GO:1900165|GO:1901222|GO:1902523|GO:1902715|GO:1903753|GO:…	miR-16-1-3p|miR-181a-5p|miR-181b-5p|miR-181c-5p|miR-181d-5p|miR-3128|miR-335-5p|miR-3646|miR-3662|miR-3668|miR-3671|miR-3692-3p|miR-4262|miR-4271|miR-4328|miR-4524a-3p|miR-4699-3p|miR-4722-3p|miR-4762-3p|miR-4795-3p|miR-548at-5p|miR-548n|miR-5589-3p|miR-561-3p|miR-5700|miR-576-5p|miR-586|miR-607|miR-617|miR-627-3p|miR-630|miR-656-3p|miR-6727-3p|miR-6783-5p|miR-6824-5p|miR-6844|miR-7156-3p|miR-876…	IKZF1|KLHL6	1.33	-0.22	-0.71	1.55	0.92	0.99	0.99	1.35	2.14	0.19	0.83	1.57	1.3	3.17	3.03207	2.54004	3.87267	3.25275
C11orf87	chromosome 11 open reading frame 87	protein coding	ENSG00000185742	399947		GO:0005515	let-7a-3p|let-7b-3p|let-7f-1-3p|miR-106a-3p|miR-10b-3p|miR-1178-5p|miR-1179|miR-1199-5p|miR-1207-3p|miR-1208|miR-1231|miR-1233-3p|miR-1238-3p|miR-124-3p|miR-1250-3p|miR-1252-5p|miR-125b-2-3p|miR-126-5p|miR-1262|miR-1263|miR-1273g-5p|miR-1277-5p|miR-128-3p|miR-137|miR-142-5p|miR-147a|miR-147b|miR-149-3p|miR-153-5p|miR-18a-5p|miR-18b-5p|miR-190a-3p|miR-200b-3p|miR-200c-3p|miR-216a-3p|miR-217|miR-21…		1.53	-0.03	0.13	1.56	1.06	1.14	1.14	1.55	2.14	0.02	0.09	1.31	1.99	3.07	2.57092	2.72939	4.25702	2.60259
LHX1	LIM homeobox 1	protein coding	ENSG00000274577	3975		GO:0001655|GO:0001657|GO:0001702|GO:0001705|GO:0001706|GO:0001822|GO:0003700|GO:0003714|GO:0005634|GO:0006366|GO:0007267|GO:0007389|GO:0007399|GO:0008045|GO:0009653|GO:0009791|GO:0009880|GO:0009887|GO:0009948|GO:0009952|GO:0009953|GO:0010468|GO:0010842|GO:0021527|GO:0021549|GO:0021702|GO:0021871|GO:0021937|GO:0035846|GO:0035847|GO:0040019|GO:0043234|GO:0045892|GO:0045893|GO:0048646|GO:0048703|GO:…	miR-1277-5p|miR-182-5p|miR-297|miR-30a-5p|miR-30d-5p|miR-30e-5p|miR-3120-5p|miR-3143|miR-340-5p|miR-3613-3p|miR-3617-5p|miR-3653-5p|miR-3927-3p|miR-4282|miR-4436a|miR-4476|miR-4482-3p|miR-450a-5p|miR-4529-3p|miR-4700-3p|miR-5000-3p|miR-5009-5p|miR-5011-5p|miR-539-5p|miR-5580-3p|miR-6124|miR-641|miR-646|miR-6750-3p|miR-6831-5p|miR-6867-5p|miR-6884-5p|miR-8058		1.12	-0.14	-0.06	1.26	0.77	0.84	0.84	1.14	2.14	0.14	0.05	1.49	1.84	2.88	2.50512	2.58761	3.70684	2.64457
DEFB125	defensin, beta 125	protein coding	ENSG00000178591	245938			miR-3123|miR-4530|miR-4687-3p|miR-6888-3p		-0.77	-0.35	0.1	-0.43	0.54	0.58	0.58	0.79	2.14	0.65	0.14	0.57	1.49	2.52	2.42492	2.86947	2.09454	2.77258
A_21_P0007198		(NA)							0.75	-0.25	-0.43	1	0.52	0.56	0.56	0.76	2.14	0.46	0.91	1.89	1.41	2.42	2.26589	2.09202	2.83766	2.52056
ENSG00000238034		lincRNA	ENSG00000238034						-0.92	0.87	0.88	-1.79	0.64	0.69	0.69	0.94	2.14	1.8	1.82	3.06	2.1	3.53	3.94144	3.94986	3.02942	3.06831
TUBB2A	tubulin, beta 2A class IIa	protein coding	ENSG00000137267	7280	04145|04540|05130	GO:0005515|GO:0005634|GO:0005874|GO:0006457|GO:0044267|GO:0051084|GO:0070062|GO:1903561	miR-1224-5p|miR-200b-3p|miR-200c-3p|miR-29a-3p|miR-29b-3p|miR-29c-3p|miR-3663-3p|miR-421|miR-429|miR-4709-5p|miR-4724-3p|miR-5004-5p|miR-591|miR-6502-3p|miR-767-5p		1.03	-0.38	0.2	1.41	0.72	0.77	0.77	1.06	2.13	0.5	0.23	1.93	2.83	12.18	11.5211	12.0991	13.1312	11.9006
OSTC	oligosaccharyltransferase complex subunit (non-catalytic)	protein coding	ENSG00000198856	58505		GO:0005515|GO:0008250|GO:0018279	miR-1290|miR-150-3p|miR-181a-2-3p|miR-3148|miR-34b-3p|miR-3692-3p|miR-378j|miR-4261|miR-4328|miR-4496|miR-4679|miR-485-3p|miR-515-5p|miR-519d-5p|miR-519e-5p|miR-539-3p|miR-548ae-3p|miR-548ah-3p|miR-548aj-3p|miR-548am-3p|miR-548an|miR-548aq-3p|miR-548j-3p|miR-548x-3p|miR-554|miR-6787-3p|miR-6818-3p|miR-6828-3p|miR-6835-3p|miR-6839-5p|miR-767-5p|miR-8076|miR-877-5p		0.65	0.17	-0.67	0.48	0.45	0.49	0.49	0.66	2.13	0.32	2	0.84	2.22	10.86	11.1639	10.3269	10.9766	10.9952
CLIC5	chloride intracellular channel 5	protein coding	ENSG00000112782	53405		GO:0005515|GO:0005794|GO:0006821|GO:0007565|GO:0007605|GO:0015629|GO:0070062	miR-1238-5p|miR-1249-5p|miR-1290|miR-130b-5p|miR-150-5p|miR-181b-2-3p|miR-181b-3p|miR-22-5p|miR-26b-3p|miR-301a-5p|miR-301b-5p|miR-3065-5p|miR-30c-1-3p|miR-30c-2-3p|miR-3127-3p|miR-3150b-3p|miR-3153|miR-3173-3p|miR-3182|miR-3191-5p|miR-320e|miR-335-3p|miR-3646|miR-3653-5p|miR-3662|miR-3665|miR-3682-5p|miR-3714|miR-3915|miR-4291|miR-4314|miR-4420|miR-4436b-3p|miR-4492|miR-450b-3p|miR-451b|miR-4632…	AFG3L1|EIF4B|FBXO5	0.79	0.13	-0.54	0.66	0.55	0.59	0.59	0.81	2.13	0.19	1.15	0.99	1.46	10.83	11.007	10.3341	11.1251	10.8737
A_33_P3316691		(NA)							1.24	-0.76	-1.73	2	0.86	0.93	0.93	1.27	2.13	0.99	2.96	2.4	2.18	3.66	3.68978	2.71773	3.96123	4.4501
CFDP1	craniofacial development protein 1	protein coding	ENSG00000153774	10428			miR-130a-5p|miR-141-3p|miR-200a-3p|miR-204-3p|miR-23a-3p|miR-23b-3p|miR-23c|miR-3668|miR-4261|miR-4646-5p|miR-548a-5p|miR-548ab|miR-548ad-5p|miR-548ae-5p|miR-548ak|miR-548am-5p|miR-548ap-5p|miR-548aq-5p|miR-548ar-5p|miR-548as-5p|miR-548au-5p|miR-548ay-5p|miR-548b-5p|miR-548bb-5p|miR-548c-5p|miR-548d-5p|miR-548h-5p|miR-548i|miR-548j-5p|miR-548n|miR-548o-5p|miR-548w|miR-548y|miR-559|miR-5683|miR-66…		-0.68	0.02	-0.33	-0.69	0.47	0.51	0.51	0.69	2.13	0.02	0.73	1.31	3.02	7.6	7.9664	7.61946	6.94091	7.9507
A_33_P3358851		(NA)							-1.56	-0.05	2.81	-1.5	1.08	1.16	1.16	1.59	2.13	0.04	4.03	1.21	3.95	3.81	2.68013	5.54776	3.99268	2.73454
A_22_P00019389		(NA)							0.97	-0.24	-1.2	1.21	0.67	0.73	0.73	0.99	2.13	0.31	2.55	1.71	2.03	3.29	3.4999	2.54046	3.50745	3.74197
ENSG00000238043		lincRNA	ENSG00000238043						1	0.95	-0.44	0.05	0.69	0.75	0.75	1.02	2.13	1.79	0.64	0.04	2.48	2.79	3.4539	2.06475	3.0634	2.50594
A_21_P0011424		(NA)							-0.93	0.27	0.79	-1.2	0.64	0.7	0.7	0.95	2.13	0.38	1.55	1.79	1.42	2.68	2.70561	3.22398	2.29552	2.43422
A_22_P00012197		(NA)							0.72	-0.03	-0.31	0.75	0.5	0.54	0.54	0.73	2.13	0.05	0.61	1.34	1.28	2.5	2.44433	2.17102	2.88751	2.47661
Hs.668028		(NA)							-0.72	-0.11	0.49	-0.61	0.5	0.54	0.54	0.73	2.13	0.17	1.15	1.01	1.44	2.48	2.32569	2.92663	2.20717	2.43587
Hs.679416		(NA)							-1.27	0.63	1.48	-1.9	0.88	0.95	0.95	1.3	2.13	0.75	2.36	2.18	1.8	3.1	3.10543	3.95958	2.68999	2.47543
A_21_P0007639		(NA)							-0.74	-0.13	0.44	-0.61	0.51	0.56	0.56	0.76	2.13	0.2	0.95	0.97	1.37	2.23	2.10123	2.67191	1.92964	2.23113
Hs.683861		(NA)							0.95	0.17	-0.55	0.78	0.66	0.71	0.71	0.97	2.12	0.21	0.91	0.96	1.35	6.63	6.79128	6.06963	7.01988	6.6209
AJUBA	ajuba LIM protein	protein coding	ENSG00000129474	84962	04390	GO:0000086|GO:0000278|GO:0000932|GO:0001666|GO:0003714|GO:0005515|GO:0005634|GO:0005829|GO:0005911|GO:0031334|GO:0035195|GO:0035331|GO:0045294|GO:1900037|GO:2000637	miR-1-3p|miR-1184|miR-1236-3p|miR-1236-5p|miR-1253|miR-1275|miR-1285-3p|miR-1324|miR-137|miR-182-5p|miR-193a-3p|miR-193b-3p|miR-206|miR-2355-5p|miR-27b-5p|miR-30a-3p|miR-30d-3p|miR-30e-3p|miR-3176|miR-3190-5p|miR-329-3p|miR-362-3p|miR-376c-3p|miR-3922-3p|miR-3943|miR-4251|miR-4286|miR-4288|miR-4324|miR-4419a|miR-4487|miR-4510|miR-4540|miR-4718|miR-4723-5p|miR-4726-3p|miR-4753-5p|miR-4790-3p|miR-4…		-1.46	-0.11	0.43	-1.35	1.02	1.1	1.1	1.5	2.12	0.07	0.38	1.13	1.31	6.2	6.27862	6.81858	5.35924	6.38411
HIP1	huntingtin interacting protein 1	protein coding	ENSG00000127946	3092	05016	GO:0005200|GO:0005515|GO:0005737|GO:0005794|GO:0005856|GO:0006915|GO:0006919|GO:0016020|GO:0030136|GO:0030276|GO:0035091|GO:0042981|GO:0043231|GO:0048260|GO:0048268|GO:0097190	let-7a-3p|let-7a-5p|let-7b-3p|let-7b-5p|let-7c-5p|let-7d-5p|let-7e-5p|let-7f-1-3p|let-7f-5p|let-7g-5p|let-7i-5p|miR-106a-3p|miR-106a-5p|miR-106b-5p|miR-1178-3p|miR-1178-5p|miR-1180-3p|miR-1199-5p|miR-1207-5p|miR-1231|miR-1237-3p|miR-1238-5p|miR-1249-5p|miR-1252-5p|miR-125b-2-3p|miR-1266-5p|miR-1273f|miR-128-3p|miR-1321|miR-1343-3p|miR-1587|miR-17-5p|miR-185-5p|miR-186-3p|miR-18a-3p|miR-1915-3p|mi…	ZYX	1.02	0.3	-1.05	0.73	0.71	0.77	0.77	1.05	2.12	0.37	1.98	0.79	2.25	5.13	5.63276	4.28799	5.31178	5.3368
ROR2	receptor tyrosine kinase-like orphan receptor 2	protein coding	ENSG00000169071	4920		GO:0005515|GO:0005886|GO:0005887|GO:0007165|GO:0007275|GO:0008285|GO:0017147|GO:0018108|GO:0030335|GO:0030669|GO:1904929	miR-124-3p|miR-1468-3p|miR-1537-5p|miR-4452|miR-4535|miR-4675|miR-4717-3p|miR-4741|miR-4803|miR-4999-3p|miR-506-3p|miR-516a-3p|miR-516b-3p|miR-5197-5p|miR-548aa|miR-548ap-3p|miR-548t-3p|miR-6126|miR-6715a-3p|miR-6762-3p|miR-6861-3p|miR-7162-5p|miR-744-5p|miR-8077		1.91	-0.04	-4.33	1.95	1.33	1.43	1.43	1.96	2.12	0.02	5.12	1.29	5.14	4.86	6.62998	2.33533	4.24502	6.66746
ALG10	ALG10, alpha-1,2-glucosyltransferase	protein coding	ENSG00000139133	84920	00510|01100	GO:0006488|GO:0018279|GO:0043687|GO:0044267	miR-1250-3p|miR-1269a|miR-1269b|miR-1273g-3p|miR-1277-5p|miR-146a-3p|miR-190a-3p|miR-205-3p|miR-208a-5p|miR-208b-5p|miR-30a-5p|miR-30b-5p|miR-30c-5p|miR-30d-5p|miR-30e-5p|miR-3123|miR-3130-5p|miR-3134|miR-3607-5p|miR-3674|miR-3915|miR-4328|miR-4463|miR-4482-5p|miR-4496|miR-4529-5p|miR-4677-5p|miR-4691-3p|miR-4693-3p|miR-4740-5p|miR-4765|miR-4768-5p|miR-4777-5p|miR-4786-3p|miR-500a-3p|miR-5011-5p|…	ATAD2|BRCA2|CCNJ|CSTF2|DEPDC1B|G3BP1|NARG1|NCAPG|NUFIP1|PNO1|RAD18|SEH1L|UTP15|WDHD1|ZBED4|ZBTB20|ZBTB24	1.18	0.84	0.17	0.34	0.82	0.89	0.89	1.21	2.12	1.2	0.16	0.25	1.84	4.18	4.38947	3.72234	4.90305	3.55239
LOC101928668	uncharacterized LOC101928668	lncRNA	ENSG00000259476	101928668					1.18	-0.07	-1.49	1.25	0.82	0.89	0.89	1.21	2.12	0.06	2.6	1.36	2.28	3.63	4.05936	2.63883	3.81625	4.12698
ARL6	ADP-ribosylation factor-like 6	protein coding	ENSG00000113966	84100		GO:0005515|GO:0005543|GO:0005737|GO:0005879|GO:0005886|GO:0005929|GO:0005930|GO:0006612|GO:0006996|GO:0007368|GO:0016020|GO:0016055|GO:0030117|GO:0032402|GO:0042384|GO:0051258|GO:0061512|GO:0070062|GO:0072372	miR-2116-5p|miR-302f|miR-3163|miR-4677-5p|miR-5187-5p|miR-5190|miR-548s|miR-630|miR-642a-3p|miR-642b-3p|miR-6728-5p|miR-6827-5p|miR-6834-5p	FBXO28|HSF2|KLHL7|PSPC1|RPAP3|WDR89	1.29	0.18	-0.6	1.11	0.9	0.97	0.97	1.32	2.12	0.16	0.68	1.03	1.27	3.5	3.60365	2.82741	4.11578	3.42373
A_21_P0012357		(NA)							2.02	-0.1	-0.75	2.12	1.41	1.52	1.52	2.07	2.12	0.05	0.51	1.35	1.3	3.27	3.05485	2.40771	4.42449	3.15893
A_22_P00012490		(NA)							-0.76	0.34	0.78	-1.1	0.53	0.57	0.57	0.78	2.12	0.65	2	2.08	1.61	2.33	2.36744	2.80872	2.05249	2.02612
A_33_P3366179		(NA)							0.87	0.12	0.1	0.76	0.61	0.66	0.66	0.89	2.12	0.15	0.12	1.04	1.85	2.89	2.69557	2.67523	3.54823	2.58016
A_22_P00016980		(NA)							1.01	-0.38	-0.84	1.4	0.71	0.76	0.76	1.04	2.12	0.52	1.49	1.95	1.42	2.67	2.56565	2.1063	3.12032	2.94924
TECRL	trans-2,3-enoyl-CoA reductase-like	protein coding	ENSG00000205678	253017			miR-1260a|miR-1260b|miR-1264|miR-1287-5p|miR-129-5p|miR-144-5p|miR-203b-5p|miR-2053|miR-2116-5p|miR-214-5p|miR-29b-2-5p|miR-30a-5p|miR-30b-5p|miR-30c-5p|miR-30d-5p|miR-30e-5p|miR-3168|miR-3606-5p|miR-3683|miR-3919|miR-412-3p|miR-4282|miR-4328|miR-4524a-3p|miR-4677-5p|miR-4694-3p|miR-4753-3p|miR-4775|miR-510-3p|miR-5100|miR-520f-5p|miR-556-3p|miR-5708|miR-590-3p|miR-607|miR-630|miR-647|miR-6718-5p…		1.16	0	-0.29	1.16	0.81	0.87	0.87	1.19	2.12	0	0.3	1.25	1.39	2.63	2.47944	2.19136	3.35032	2.47647
ENSG00000256273		lincRNA	ENSG00000256273						-0.85	-0.22	0.42	-0.63	0.59	0.64	0.64	0.87	2.12	0.32	0.74	0.84	1.35	2.46	2.30237	2.93716	2.09135	2.51883
Hs.655994		(NA)							-1.12	0.62	2.65	-1.74	0.78	0.84	0.84	1.15	2.12	0.85	5.32	2.27	4.67	4.17	3.507	5.53479	4.41342	2.88839
KCNH1	potassium channel, voltage gated eag related subfamily H, member 1	protein coding	ENSG00000143473	3756		GO:0005251|GO:0005515|GO:0005886|GO:0005887|GO:0006813|GO:0007268|GO:0007520|GO:0008076|GO:0031901|GO:0042127|GO:0071805	miR-103a-3p|miR-107|miR-1207-5p|miR-1254|miR-1260a|miR-1260b|miR-1293|miR-1297|miR-1321|miR-138-5p|miR-148a-3p|miR-148b-3p|miR-152-3p|miR-181a-5p|miR-181b-5p|miR-181c-5p|miR-181d-5p|miR-1827|miR-193a-5p|miR-204-3p|miR-2113|miR-218-5p|miR-224-5p|miR-2682-5p|miR-28-3p|miR-2861|miR-3116|miR-3125|miR-3138|miR-3150b-3p|miR-3158-5p|miR-3173-5p|miR-3180-5p|miR-3202|miR-326|miR-330-5p|miR-34b-5p|miR-3616…		-0.95	-0.19	0.15	-0.76	0.66	0.71	0.71	0.97	2.12	0.24	0.18	0.93	1.4	2.4	2.42921	2.76938	1.82032	2.61999
Hs.191330		(NA)							-0.81	0.12	0.6	-0.93	0.56	0.61	0.61	0.83	2.12	0.17	1.29	1.53	1.33	2.33	2.31131	2.78967	1.98083	2.18749
A_21_P0008190		(NA)							-0.82	-0.03	0.95	-0.79	0.57	0.62	0.62	0.84	2.12	0.03	2.32	1.2	2.15	2.32	2.01422	2.99166	2.16982	2.04154
A_21_P0005741		(NA)							-0.84	0.09	0.72	-0.93	0.58	0.63	0.63	0.86	2.12	0.12	1.56	1.45	1.45	2.29	2.19479	2.82571	1.98641	2.10444
GALNT14	polypeptide N-acetylgalactosaminyltransferase 14	protein coding	ENSG00000158089	79623	00512|01100	GO:0000139|GO:0006493|GO:0016266|GO:0043687|GO:0044267	miR-1225-3p|miR-125a-5p|miR-125b-5p|miR-3176|miR-3922-3p|miR-4283|miR-4319|miR-4515|miR-6748-3p|miR-6772-3p|miR-6878-3p|miR-7152-3p|miR-8065	APPL2|ASB10|BACH1|CHERP|DISC1|IGHMBP2|KRT7|PHLDB1|WWOX|ZNF804B	-2.44	1.18	3.58	-3.62	1.7	1.83	1.83	2.5	2.12	0.72	3.14	2.14	2.37	4.82	4.42598	6.82711	4.38844	3.24448
A_21_P0014023		(NA)							0.87	0.3	-1.27	0.58	0.61	0.66	0.66	0.9	2.11	0.45	3.08	0.72	3.46	10.72	11.3843	9.82014	10.6939	11.0884
PLP2	proteolipid protein 2 (colonic epithelium-enriched)	protein coding	ENSG00000102007	5355		GO:0005515|GO:0005783|GO:0005789|GO:0005886|GO:0006811|GO:0015075|GO:0016020|GO:0019956|GO:0034220|GO:0070062	miR-124-3p|miR-150-5p|miR-3164|miR-3622b-5p|miR-3652|miR-3678-3p|miR-4423-3p|miR-4430|miR-4447|miR-4459|miR-4651|miR-4701-5p|miR-4713-5p|miR-4777-3p|miR-4802-5p|miR-500b-3p|miR-506-3p|miR-548an|miR-5582-5p|miR-588|miR-608|miR-642a-5p|miR-664a-3p|miR-6756-5p|miR-6766-5p|miR-6820-3p|miR-6825-5p|miR-7-5p|miR-7150|miR-758-3p|miR-765|miR-92a-2-5p		0.81	0.3	-0.43	0.51	0.56	0.61	0.61	0.83	2.11	0.51	0.81	0.67	1.5	10.18	10.4161	9.6853	10.4942	10.1137
Hs.660306		(NA)							-0.91	-0.42	1.02	-0.49	0.64	0.69	0.69	0.94	2.11	0.67	2.21	0.55	2.81	5.9	5.28699	6.73104	5.81699	5.70784
A_21_P0009753		(NA)							-1.01	-0.14	-0.72	-0.87	0.7	0.76	0.76	1.04	2.11	0.15	1.21	1.02	3.38	4.56	5.11251	4.53145	3.52466	5.25081
METTL9	methyltransferase like 9	protein coding	ENSG00000197006	51108		GO:0005515	miR-10b-3p|miR-1185-5p|miR-1231|miR-1252-3p|miR-1275|miR-1279|miR-1283|miR-141-5p|miR-142-5p|miR-153-5p|miR-155-3p|miR-186-5p|miR-198|miR-202-3p|miR-204-3p|miR-2114-5p|miR-2117|miR-218-1-3p|miR-219a-1-3p|miR-29b-2-5p|miR-3119|miR-3145-3p|miR-3148|miR-3190-3p|miR-3192-5p|miR-326|miR-329-3p|miR-330-5p|miR-362-3p|miR-3679-5p|miR-3685|miR-3941|miR-4251|miR-4259|miR-4280|miR-4287|miR-4306|miR-4310|miR…	CNOT2	-1.01	0	-0.51	-1.01	0.71	0.76	0.76	1.04	2.11	0	0.76	1.25	3	4.52	5.05924	4.54899	3.53933	5.06302
PASK	PAS domain containing serine/threonine kinase	protein coding	ENSG00000115687	23178		GO:0004674|GO:0005515|GO:0005634|GO:0005737|GO:0005794|GO:0006468|GO:0035091|GO:0043576|GO:0045719|GO:0045727|GO:0046777|GO:0070092|GO:2000505	let-7a-3p|let-7b-3p|let-7f-1-3p|miR-129-1-3p|miR-129-2-3p|miR-3182|miR-3190-5p|miR-3691-3p|miR-380-3p|miR-3915|miR-4261|miR-4293|miR-4422|miR-4531|miR-4534|miR-4800-3p|miR-515-5p|miR-519e-5p|miR-5589-3p|miR-6715a-3p|miR-6757-3p|miR-6847-5p|miR-7154-5p|miR-98-3p		1.13	0.61	0.25	0.52	0.79	0.85	0.85	1.16	2.11	0.83	0.26	0.44	1.86	3.87	3.88278	3.51767	4.64669	3.26909
SNORD116-12	small nucleolar RNA, C/D box 116-12	other ncRNA	ENSG00000207197	100033424					-1.29	-0.53	1.19	-0.76	0.9	0.97	0.97	1.33	2.11	0.58	1.71	0.61	2.23	3.43	2.74527	4.46604	3.1759	3.27605
NEDD4L	neural precursor cell expressed, developmentally down-regulated 4-like, E3 ubiquitin protein ligase	protein coding	ENSG00000049759	23327	04120|04144|04960	GO:0000122|GO:0003254|GO:0004842|GO:0005515|GO:0005622|GO:0005654|GO:0005829|GO:0006351|GO:0006367|GO:0007179|GO:0010038|GO:0010467|GO:0015459|GO:0016032|GO:0016567|GO:0017080|GO:0019058|GO:0019870|GO:0019871|GO:0030512|GO:0034220|GO:0034765|GO:0042391|GO:0042787|GO:0043161|GO:0044325|GO:0055085|GO:0060306|GO:0070062|GO:0070936|GO:0086005|GO:1901016|GO:1901017|GO:1901380|GO:1902306|GO:1903861|GO:…	let-7a-3p|let-7b-3p|let-7c-3p|let-7f-1-3p|miR-105-5p|miR-106a-5p|miR-106b-5p|miR-1178-3p|miR-1206|miR-1207-5p|miR-1208|miR-1251-3p|miR-1252-5p|miR-1265|miR-1273e|miR-1277-5p|miR-130a-5p|miR-142-5p|miR-17-5p|miR-1827|miR-185-3p|miR-1910-5p|miR-196a-5p|miR-196b-5p|miR-203a-3p|miR-2052|miR-20a-5p|miR-20b-5p|miR-2355-3p|miR-23a-3p|miR-23b-3p|miR-23c|miR-2467-3p|miR-25-3p|miR-2682-5p|miR-3064-5p|miR-3…		-1.81	-1.21	0.05	-0.6	1.27	1.37	1.37	1.86	2.11	1.1	0.03	0.3	1.68	3.41	2.98193	4.24625	2.43207	4.19167
A_22_P00013902		(NA)							-0.86	-0.69	-0.43	-0.17	0.6	0.65	0.65	0.88	2.11	1.41	0.75	0.16	2.36	3.26	3.20948	3.46552	2.60971	3.89556
G6PC3	glucose 6 phosphatase, catalytic, 3	protein coding	ENSG00000141349	92579	00010|00052|00500|01100|04068|04151|04152|04910|04920|04922|04931|04973	GO:0004346|GO:0005789|GO:0005975|GO:0008645|GO:0015758|GO:0016020|GO:0016311|GO:0044281|GO:0055085	miR-122-5p|miR-1227-5p|miR-1249-5p|miR-1298-3p|miR-1321|miR-149-3p|miR-3158-3p|miR-3192-5p|miR-323a-5p|miR-4260|miR-4466|miR-4489|miR-4492|miR-4728-5p|miR-4739|miR-4749-3p|miR-4756-5p|miR-6085|miR-6731-5p|miR-675-5p|miR-6785-5p|miR-6791-3p|miR-6797-5p|miR-6829-3p|miR-6883-5p|miR-8085	AAAS|CORO1B|HMG20B|SP4|TBCD|TRAF7	0.66	-0.32	-0.9	0.98	0.46	0.5	0.5	0.68	2.11	0.7	2.81	2.12	2.1	6.48	6.55326	5.97383	6.63627	6.86925
ENSG00000238010		lncRNA	ENSG00000238010						-0.81	-0.79	0.41	-0.02	0.56	0.61	0.61	0.83	2.11	1.85	0.76	0.02	2.64	2.94	2.35499	3.55565	2.74803	3.1445
A_22_P00016739		(NA)							0.85	0.14	0.01	0.71	0.59	0.64	0.64	0.87	2.11	0.18	0.01	0.99	1.63	2.43	2.29611	2.16954	3.01716	2.16079
DIO3	deiodinase, iodothyronine, type III	protein coding	ENSG00000197406	1735	04919	GO:0005886|GO:0006590|GO:0034641|GO:0044281	miR-1204|miR-1227-5p|miR-1915-3p|miR-3178|miR-3197|miR-4264|miR-4283|miR-4291|miR-4645-5p|miR-4661-5p|miR-4673|miR-4731-5p|miR-4755-3p|miR-4758-3p|miR-4777-3p|miR-4795-3p|miR-622|miR-6511a-3p|miR-6511b-3p|miR-6753-5p|miR-6764-5p|miR-6793-3p|miR-6799-5p|miR-6802-3p|miR-6852-5p|miR-6866-5p|miR-7113-5p		-1.19	0.68	1.43	-1.86	0.83	0.89	0.89	1.22	2.11	0.89	2.44	2.29	1.84	2.63	2.67506	3.43006	2.24435	1.99942
PIP5KL1	phosphatidylinositol-4-phosphate 5-kinase-like 1	protein coding	ENSG00000167103	138429	00562|01100|04144	GO:0005737	miR-1252-3p|miR-3123|miR-338-3p|miR-3607-3p|miR-3686|miR-4310|miR-4311|miR-556-5p|miR-610|miR-6753-3p|miR-7107-3p		-1.19	-2.06	-1.75	0.87	0.83	0.89	0.89	1.22	2.11	3.81	3.14	0.82	4.5	4.39	4.13009	4.44036	3.25266	6.18859
Hs.729937		(NA)							0.69	0.11	-0.17	0.58	0.48	0.52	0.52	0.71	2.11	0.19	0.31	0.98	1.32	2.26	2.25324	1.9661	2.65699	2.13883
A_22_P00016827		(NA)							-0.74	0.08	0.7	-0.82	0.52	0.56	0.56	0.77	2.11	0.11	1.75	1.43	1.56	2.18	2.06647	2.68869	1.94377	1.99109
GLTSCR2	glioma tumor suppressor candidate region gene 2	protein coding	ENSG00000105373	29997	05168	GO:0005730|GO:0043231|GO:0044822		ADARB1|ELAVL3|EVX1|FOXP3|MBD6|MYST3|PTBP1|RBM17|REXO1|RGS6|RPS4X|SARDH|SPDEF|STAU2|TCF15|TNPO2|ZNF286A|ZNF423	-0.63	-0.04	-0.05	-0.58	0.44	0.47	0.47	0.65	2.1	0.07	0.08	1.13	1.82	12.37	12.5321	12.5304	11.9039	12.5762
DIRAS3	DIRAS family, GTP-binding RAS-like 3	protein coding	ENSG00000162595	9077		GO:0000079|GO:0003924|GO:0005515|GO:0005622|GO:0006349	miR-105-5p|miR-1245b-5p|miR-125b-1-3p|miR-129-5p|miR-153-5p|miR-204-3p|miR-31-3p|miR-3142|miR-3191-5p|miR-3606-5p|miR-371a-5p|miR-379-3p|miR-411-3p|miR-4262|miR-4279|miR-4436b-5p|miR-4452|miR-4646-5p|miR-4668-5p|miR-4764-5p|miR-548m|miR-624-3p|miR-661|miR-664a-3p|miR-7853-5p|miR-877-3p		2.15	0.38	2.35	1.77	1.51	1.63	1.63	2.22	2.1	0.2	2.13	0.95	4.37	8.67	7.12182	9.09009	11.2389	6.73802
TBX2-AS1	TBX2 antisense RNA 1	asRNA	ENSG00000267280	103689912					-1.15	0.4	0.19	-1.55	0.81	0.87	0.87	1.19	2.1	0.47	0.19	1.87	1.91	8.35	8.85131	8.63998	7.49087	8.4467
CCNB1IP1	cyclin B1 interacting protein 1, E3 ubiquitin protein ligase	protein coding	ENSG00000100814	57820		GO:0005515|GO:0007131|GO:0051026	miR-4437|miR-504-3p|miR-939-3p		-0.76	0.11	-1.02	-0.87	0.53	0.58	0.58	0.78	2.1	0.16	2.79	1.5	5.56	7.82	8.64891	7.51473	6.75514	8.53853
A_33_P3336223		(NA)							0.99	-0.37	-1.63	1.36	0.69	0.75	0.75	1.02	2.1	0.51	3.58	1.92	2.89	5.72	6.05541	4.79741	5.78436	6.42848
FAM228B	family with sequence similarity 228, member B	protein coding	ENSG00000219626	375190			miR-2110|miR-371b-5p|miR-373-5p|miR-4419a|miR-4436a|miR-4510|miR-4667-5p|miR-4700-5p|miR-5000-3p|miR-6127|miR-6129|miR-6130|miR-6133|miR-616-5p|miR-6834-5p|miR-8089|miR-888-5p		-0.82	-0.64	-1.33	-0.18	0.57	0.62	0.62	0.84	2.1	1.36	3.52	0.18	5.12	5.56	6.02029	5.32692	4.50767	6.66017
BRI3BP	BRI3 binding protein	protein coding	ENSG00000184992	140707		GO:0005739	miR-1273e|miR-133a-5p|miR-193b-5p|miR-3170|miR-3171|miR-363-5p|miR-3679-3p|miR-4264|miR-4286|miR-4314|miR-4318|miR-4329|miR-4477a|miR-4524a-3p|miR-5001-3p|miR-548ac|miR-548bb-3p|miR-548d-3p|miR-548h-3p|miR-548z|miR-5572|miR-6740-5p|miR-6745|miR-6756-5p|miR-6766-5p|miR-6809-3p|miR-6855-5p	BUB3|CCNA2|CCNB1|HELLS|MCM4|NCAPG2|RFC5|RFWD3	1.27	0.85	-0.77	0.42	0.89	0.96	0.96	1.31	2.1	1.1	0.95	0.29	2.09	4.82	5.52021	3.89949	5.17275	4.6653
FAM104B	family with sequence similarity 104, member B	protein coding	ENSG00000182518	90736			miR-1258|miR-205-5p|miR-3122|miR-3202|miR-3913-5p|miR-3915|miR-4271|miR-4303|miR-4419a|miR-4510|miR-4716-3p|miR-4725-3p|miR-5196-5p|miR-6127|miR-6129|miR-6130|miR-6131|miR-6133|miR-6731-5p|miR-6760-5p|miR-6780b-5p|miR-6792-5p|miR-6794-5p|miR-6808-5p|miR-6878-5p|miR-6893-5p|miR-759|miR-8085|miR-940		-0.94	-0.08	-1.17	-0.86	0.66	0.71	0.71	0.97	2.1	0.09	2.52	1.1	4.92	4.43	5.24013	4.15304	3.21092	5.32335
Hs.738561		(NA)							-1.06	0.28	0.43	-1.34	0.74	0.8	0.8	1.09	2.1	0.33	0.57	1.72	1.43	3.95	4.21395	4.3617	3.3053	3.92931
PEG3	paternally expressed 3	protein coding	ENSG00000198300	5178		GO:0005654	miR-1178-5p|miR-1193|miR-1277-5p|miR-1279|miR-1288-5p|miR-129-5p|miR-135a-3p|miR-153-5p|miR-1914-5p|miR-203b-3p|miR-20b-3p|miR-21-3p|miR-2681-3p|miR-3123|miR-3133|miR-3149|miR-3591-3p|miR-3607-3p|miR-3609|miR-3646|miR-3664-3p|miR-3679-3p|miR-3686|miR-3688-3p|miR-3688-5p|miR-3692-3p|miR-3922-5p|miR-3924|miR-3940-5p|miR-4318|miR-432-3p|miR-4423-3p|miR-4425|miR-4436a|miR-4453|miR-4477b|miR-4507|miR-…		-1.23	-0.36	0.8	-0.87	0.86	0.93	0.93	1.27	2.1	0.37	1.05	0.78	1.52	2.87	2.50827	3.66597	2.43565	2.86876
TAT-AS1	TAT antisense RNA 1	asRNA							0.72	0.1	-0.39	0.62	0.5	0.54	0.54	0.74	2.1	0.15	0.84	1.02	1.29	2.74	2.83113	2.33896	3.05532	2.73256
A_22_P00006556		(NA)							1.15	-0.19	-0.24	1.34	0.8	0.87	0.87	1.18	2.1	0.19	0.25	1.53	1.57	2.69	2.36836	2.31826	3.46505	2.55868
LOC101928909	uncharacterized LOC101928909	asRNA	ENSG00000259163	101928909					-0.77	0.64	0.9	-1.4	0.54	0.58	0.58	0.79	2.1	1.47	2.35	2.78	1.95	2.4	2.58944	2.85429	2.08757	1.95311
LINC01134	long intergenic non-protein coding RNA 1134	lincRNA	ENSG00000236423	100133612					-0.85	-0.07	0.96	-0.79	0.6	0.65	0.65	0.88	2.1	0.08	2.21	1.11	2.11	2.61	2.27769	3.30153	2.44883	2.34534
A_19_P00800061		(NA)							-1.26	-0.77	0.35	-0.49	0.88	0.95	0.95	1.3	2.1	0.97	0.35	0.36	1.63	2.48	2.06837	3.18809	1.93029	2.83593
A_21_P0007901		(NA)							0.86	0.45	0.11	0.41	0.6	0.65	0.65	0.88	2.1	0.79	0.14	0.46	1.72	2.41	2.45545	2.11858	2.97495	2.0068
BBS5	Bardet-Biedl syndrome 5	protein coding	ENSG00000163093	129880		GO:0001103|GO:0001947|GO:0005515|GO:0005622|GO:0005829|GO:0006996|GO:0032266|GO:0032402|GO:0034464|GO:0036064|GO:0042384|GO:0044458	miR-1224-3p|miR-1537-5p|miR-3180|miR-3180-3p|miR-3196|miR-4755-3p|miR-548a-3p|miR-548ar-3p|miR-548az-3p|miR-548e-3p|miR-548f-3p|miR-589-3p|miR-6134|miR-670-3p|miR-6808-5p|miR-6816-5p|miR-7844-5p		-0.65	-0.16	1.23	-0.49	0.46	0.49	0.49	0.67	2.09	0.3	4.15	0.85	4.47	10.95	10.3556	11.7436	11.092	10.5157
ANKRD37	ankyrin repeat domain 37	protein coding	ENSG00000186352	353322			miR-2116-5p|miR-338-3p|miR-3614-5p|miR-561-3p|miR-6837-3p		-1.03	0.07	0.46	-1.11	0.73	0.79	0.79	1.07	2.09	0.07	0.63	1.36	1.25	5.87	5.95285	6.33692	5.30357	5.87862
Hs.659870		(NA)							-1.24	-0.11	3.05	-1.13	0.87	0.94	0.94	1.28	2.09	0.09	5.49	1.1	5.75	5.01	3.63636	6.79253	5.55396	3.74474
ALPK3	alpha-kinase 3	protein coding	ENSG00000136383	57538		GO:0005634|GO:0007507	miR-1207-5p|miR-1233-5p|miR-1238-5p|miR-1252-5p|miR-125a-5p|miR-125b-5p|miR-1262|miR-1343-5p|miR-1915-3p|miR-2467-3p|miR-30c-1-3p|miR-30c-2-3p|miR-3155a|miR-3155b|miR-3190-5p|miR-3192-5p|miR-3202|miR-328-3p|miR-3607-5p|miR-361-3p|miR-3614-5p|miR-3616-3p|miR-3692-5p|miR-378g|miR-4266|miR-4267|miR-4297|miR-4319|miR-4438|miR-4451|miR-4481|miR-4492|miR-4498|miR-4500|miR-4527|miR-4530|miR-4531|miR-469…		-2.56	-0.31	4.12	-2.25	1.8	1.94	1.94	2.65	2.09	0.13	3.46	1.04	3.46	4.41	2.66733	7.09476	4.53795	2.97714
PEX11A	peroxisomal biogenesis factor 11 alpha	protein coding	ENSG00000166821	8800	04146	GO:0005515|GO:0005777|GO:0005778|GO:0005779|GO:0007031|GO:0007165|GO:0016559|GO:0042803|GO:0043234|GO:0044255|GO:0044281|GO:0044375	let-7a-3p|miR-1178-3p|miR-1243|miR-130a-5p|miR-204-3p|miR-23a-3p|miR-23b-3p|miR-23c|miR-29a-5p|miR-3156-3p|miR-3164|miR-3938|miR-3942-3p|miR-4294|miR-4306|miR-4310|miR-4314|miR-4492|miR-4638-3p|miR-4646-5p|miR-4732-3p|miR-4774-3p|miR-5093|miR-532-3p|miR-627-5p|miR-6508-5p|miR-670-5p|miR-6719-3p|miR-6731-5p|miR-6757-3p|miR-6820-3p|miR-6847-5p|miR-6864-5p|miR-6871-5p|miR-6895-5p|miR-7515|miR-8067|m…		0.96	0.22	-1.51	0.74	0.68	0.73	0.73	0.99	2.09	0.27	3.35	0.87	3.54	4.22	4.92909	3.20171	4.16237	4.7092
A_21_P0003071		(NA)							1.1	-0.43	-0.84	1.53	0.77	0.95	0.95	1.22	2.09	0.45	1.11	1.76	1.31	3.08	2.94239	2.52793	3.63094	3.37079
Hs.679546		(NA)							-1.08	-0.11	0.72	-0.96	0.76	0.82	0.82	1.12	2.09	0.11	1.1	1.07	1.35	2.9	2.71603	3.55422	2.47554	2.82994
Hs.665981		(NA)							0.97	-0.33	-1.2	1.3	0.68	0.74	0.74	1.01	2.09	0.44	2.49	1.84	1.91	2.83	2.97444	2.10028	3.07431	3.30287
A_21_P0005580		(NA)							1.06	-0.44	-0.87	1.5	0.75	0.81	0.81	1.1	2.09	0.57	1.44	1.97	1.4	2.72	2.58167	2.14578	3.20843	3.01805
S100A14	S100 calcium binding protein A14	protein coding	ENSG00000189334	57402		GO:0005515|GO:0005654|GO:0005737|GO:0005886|GO:0015630|GO:0030054|GO:0034142|GO:0042379|GO:0048471|GO:0070062|GO:0071624|GO:0090026	miR-2110|miR-3678-3p|miR-4267|miR-4271|miR-4483|miR-450a-2-3p|miR-4667-5p|miR-4700-5p|miR-4725-3p|miR-4747-5p|miR-486-3p|miR-5196-5p|miR-6077|miR-6780b-5p|miR-6793-3p|miR-6811-5p|miR-6841-5p|miR-6852-3p|miR-6852-5p|miR-8089	GRHL2|PKP3|RBM35A|RBM35B	-0.71	0.24	0.61	-0.95	0.5	0.54	0.54	0.74	2.09	0.44	1.53	1.83	1.39	2.62	2.65824	3.03016	2.31615	2.41973
LINC01505	lincRNA 1505	lincRNA	ENSG00000234229	100996590					0.74	0.49	0.02	0.25	0.52	0.56	0.56	0.76	2.09	1.09	0.02	0.3	1.69	2.58	2.73017	2.25729	2.99563	2.23887
A_21_P0014309		(NA)							-0.92	0.67	0.95	-1.59	0.65	0.7	0.7	0.96	2.09	1.21	1.95	2.56	1.73	2.42	2.65003	2.93249	2.00759	1.98293
CTRL	chymotrypsin-like	protein coding	ENSG00000141086	1506	04972|04974	GO:0005615|GO:0007586	miR-143-5p|miR-432-3p|miR-4441|miR-4447|miR-4531|miR-4534|miR-6889-3p|miR-7-5p|miR-8082|miR-874-3p		0.88	0.66	0.01	0.22	0.62	0.67	0.67	0.91	2.09	1.28	0.01	0.21	1.76	2.42	2.66894	2.01007	2.89238	2.00431
ALDH1A3	aldehyde dehydrogenase 1 family, member A3	protein coding	ENSG00000184254	220	00010|00340|00350|00360|00410|00980|00982|01100|05204	GO:0004030|GO:0005737|GO:0005829|GO:0042573|GO:0042574|GO:0042803|GO:0048048|GO:0070062	miR-106a-5p|miR-106b-5p|miR-1247-3p|miR-127-5p|miR-144-3p|miR-145-5p|miR-15a-5p|miR-15b-5p|miR-16-5p|miR-17-5p|miR-195-5p|miR-200b-3p|miR-200c-3p|miR-20a-5p|miR-20b-5p|miR-2682-5p|miR-29a-5p|miR-29b-1-5p|miR-301a-5p|miR-301b-5p|miR-3064-3p|miR-31-3p|miR-3125|miR-33b-3p|miR-34b-5p|miR-378g|miR-3916|miR-3925-3p|miR-3927-3p|miR-424-5p|miR-429|miR-4299|miR-449c-5p|miR-4524a-5p|miR-4524b-5p|miR-4531|m…	COL12A1	1.39	-1.01	-0.5	2.4	0.98	1.06	1.06	1.44	2.08	1.22	0.48	2.56	2.25	8.91	8.06555	8.57076	9.95802	9.07448
MPP1	membrane protein, palmitoylated 1, 55kDa	protein coding	ENSG00000130830	4354		GO:0004385|GO:0005515|GO:0005622|GO:0005887|GO:0007165|GO:0016020|GO:0046037|GO:0046710|GO:0090022	miR-1227-5p|miR-137|miR-25-3p|miR-3064-5p|miR-3135b|miR-3140-3p|miR-3158-5p|miR-3184-5p|miR-32-5p|miR-363-3p|miR-3646|miR-367-3p|miR-3945|miR-423-5p|miR-4293|miR-4446-5p|miR-495-5p|miR-515-5p|miR-519d-5p|miR-519e-5p|miR-605-3p|miR-6081|miR-6126|miR-6504-5p|miR-6798-3p|miR-92a-3p|miR-92b-3p		0.84	0.31	-0.55	0.53	0.59	0.64	0.64	0.87	2.08	0.5	1.06	0.66	1.63	9.83	10.129	9.26954	10.1056	9.81856
WDFY3	WD repeat and FYVE domain containing 3	protein coding	ENSG00000163625	23001		GO:0005515|GO:0005545|GO:0005635|GO:0005737|GO:0005776|GO:0016234|GO:0016239|GO:0016605|GO:0019898|GO:0035973	let-7c-3p|miR-1-5p|miR-106a-5p|miR-106b-5p|miR-1208|miR-1233-3p|miR-124-3p|miR-1245b-5p|miR-1252-3p|miR-1255a|miR-1255b-5p|miR-1260a|miR-1260b|miR-1264|miR-1275|miR-1277-5p|miR-1285-5p|miR-1290|miR-1304-3p|miR-130a-3p|miR-130b-3p|miR-134-3p|miR-140-3p|miR-140-5p|miR-141-3p|miR-144-3p|miR-145-5p|miR-1468-3p|miR-146b-3p|miR-149-3p|miR-153-5p|miR-17-5p|miR-181a-5p|miR-181b-5p|miR-181c-5p|miR-181d-5p…	C20orf194|RNF146	-0.71	-0.52	0.86	-0.19	0.5	0.54	0.54	0.74	2.08	1.22	2.43	0.23	3.59	6.17	5.52551	6.90444	6.194	6.04103
LOC100129917	uncharacterized LOC100129917	lncRNA							-1.43	0.05	1.86	-1.48	1.01	1.09	1.09	1.49	2.08	0.04	2.64	1.3	2.34	4.57	4.00349	5.80693	4.37621	3.95098
CCDC150	coiled-coil domain containing 150	protein coding	ENSG00000144395	284992		GO:0005515	miR-3529-3p|miR-3613-3p|miR-363-5p|miR-3936|miR-4475|miR-485-3p|miR-539-3p|miR-6745|miR-6762-3p|miR-7845-5p|miR-8066		-0.99	-0.16	0.45	-0.83	0.7	0.75	0.75	1.03	2.08	0.19	0.64	0.97	1.25	3.43	3.3351	3.94608	2.9555	3.49982
HBM	hemoglobin, mu	protein coding	ENSG00000206177	3042		GO:0070062			-0.89	0.4	0.86	-1.29	0.63	0.68	0.68	0.92	2.08	0.64	1.8	2.04	1.5	3.13	3.20187	3.66302	2.77326	2.80213
A_33_P3346643		(NA)							-0.86	0.53	1.23	-1.39	0.6	0.65	0.65	0.89	2.08	0.99	3.01	2.37	2.2	2.88	2.84412	3.54208	2.68688	2.30975
IFNLR1	interferon, lambda receptor 1	protein coding	ENSG00000185436	163702	04060|04630	GO:0002385|GO:0005515|GO:0032002|GO:0034342|GO:0050691|GO:0051607	miR-1227-5p|miR-1273h-5p|miR-1275|miR-1291|miR-224-3p|miR-302e|miR-30a-5p|miR-30b-3p|miR-30b-5p|miR-30c-5p|miR-30d-5p|miR-30e-5p|miR-3121-3p|miR-3132|miR-3175|miR-3613-3p|miR-3650|miR-3689a-3p|miR-3689b-3p|miR-3689c|miR-376c-3p|miR-4292|miR-4306|miR-4308|miR-4457|miR-4478|miR-4486|miR-4492|miR-449b-3p|miR-4500|miR-4534|miR-4704-3p|miR-4708-5p|miR-4719|miR-485-5p|miR-493-3p|miR-513a-5p|miR-514a-5p…		0.92	-0.19	-0.36	1.11	0.65	0.7	0.7	0.95	2.08	0.25	0.54	1.61	1.37	2.55	2.35804	2.18899	3.10645	2.55214
ENSG00000250619		asRNA	ENSG00000250619						1.02	0.26	0.22	0.76	0.72	0.78	0.78	1.06	2.08	0.31	0.25	0.82	1.92	2.46	2.26401	2.22039	3.24378	2.00007
A_21_P0003453		(NA)							0.71	-0.08	-0.46	0.79	0.5	0.54	0.54	0.73	2.08	0.12	1.04	1.43	1.24	2.45	2.45101	2.07312	2.77975	2.53207
A_21_P0009193		(NA)							-0.87	0.86	1	-1.74	0.62	0.67	0.67	0.91	2.08	1.85	2.24	3.06	2.1	3.01	3.34603	3.47927	2.60564	2.48227
ENSG00000250706		lincRNA	ENSG00000250706						0.82	0.35	0.05	0.48	0.58	0.63	0.63	0.86	2.08	0.58	0.06	0.6	1.6	2.4	2.40343	2.10882	2.93318	2.05822
SEPT7-AS1	SEPT7 antisense RNA 1 (head to head)	asRNA							-1.01	0.79	1.11	-1.8	0.71	0.77	0.77	1.05	2.08	1.35	2.12	2.67	1.83	2.9	3.15968	3.47596	2.46602	2.36973
ENSG00000236319		pseudogene	ENSG00000236319						0.94	-0.23	0.1	1.17	0.66	0.71	0.71	0.97	2.08	0.29	0.11	1.66	2.32	2.26	1.79023	2.11919	3.05592	2.01872
KCNN4	potassium channel, calcium activated intermediate/small conductance subfamily N alpha, member 4	protein coding	ENSG00000104783	3783	04911|04970|04974	GO:0005515|GO:0005886|GO:0006813|GO:0006816|GO:0006952|GO:0007268|GO:0008076|GO:0015269|GO:0019903|GO:0030322|GO:0050862	miR-103a-3p|miR-107|miR-15a-5p|miR-15b-5p|miR-16-5p|miR-195-5p|miR-2278|miR-2467-3p|miR-424-5p|miR-4492|miR-4524a-5p|miR-4524b-5p|miR-4729|miR-4733-3p|miR-497-5p|miR-518c-5p|miR-520d-5p|miR-524-5p|miR-6798-5p|miR-6838-5p|miR-6852-3p|miR-875-3p		1.65	0.49	3.02	1.16	1.17	1.27	1.27	1.73	2.07	0.37	3.96	0.76	6.08	6.44	4.74929	7.27296	8.92712	4.25724
FAM149B1	family with sequence similarity 149, member B1	protein coding	ENSG00000138286	317662			miR-1225-5p|miR-1976|miR-3126-3p|miR-3148|miR-3156-5p|miR-3606-5p|miR-374a-5p|miR-374b-5p|miR-4478|miR-4519|miR-4645-3p|miR-4728-3p|miR-4729|miR-4766-5p|miR-4775|miR-4804-3p|miR-5010-3p|miR-548a-3p|miR-548ar-3p|miR-548az-3p|miR-548e-3p|miR-548f-3p|miR-6071|miR-647|miR-657|miR-6762-3p|miR-6888-3p|miR-7154-5p|miR-8060|miR-8062|miR-93-3p	ACBD6|ANAPC1|BUB3|CCNB1|CCNB2|CDC20|CDC6|CSTF1|CSTF2|CSTF3|DBF4|DDX46|DTL|EIF4A3|EXO1|FANCG|FBXO11|FBXO5|FOXM1|H2AFZ|HEATR1|HELLS|HMG4L|ILF3|KPNA2|LIG1|MCM2|MCM4|MCM6|MCM7|MKL1|MSH2|MSH6|MYBL2|NCBP2|NUP37|POLQ|PWP1|RECQL4|RFC4|RFC5|RNASEH2A|RNGTT|SEH1L|SRP72|SYNCRIP|TAF5|TCTN2|TEX10|TFAM|TFDP1|THOC3|TIAL1|TMEM68|TREX1|UTP15|WDR4|WDSOF1|WHSC1|ZNF207|ZNF473	-1.03	-0.15	-0.79	-0.88	0.73	0.79	0.79	1.07	2.07	0.16	1.31	0.99	3.46	5.93	6.51827	5.87636	4.84848	6.66799
CCK	cholecystokinin	protein coding	ENSG00000187094	885		GO:0001764|GO:0005179|GO:0005184|GO:0005515|GO:0005576|GO:0007165|GO:0007409|GO:0030424|GO:0042755	miR-130a-5p|miR-146a-5p|miR-146b-5p|miR-23a-3p|miR-23b-3p|miR-23c|miR-3121-3p|miR-3620-5p|miR-4299|miR-4638-3p|miR-4710|miR-5193|miR-574-5p|miR-600|miR-6791-3p|miR-6829-3p|miR-7153-5p		-3.09	0.42	3	-3.52	2.19	2.37	2.37	3.23	2.07	0.15	1.8	1.46	1.54	4.98	4.51781	7.09887	4.00528	4.09392
Hs.190748		(NA)							-1.22	-0.46	-1.6	-0.76	0.86	0.93	0.93	1.27	2.07	0.51	2.66	0.65	4.66	4.06	4.89714	3.75671	2.53435	5.35752
Hs.558816		(NA)							-1.01	-0.34	1.5	-0.67	0.71	0.77	0.77	1.05	2.07	0.44	3.12	0.71	3.49	3.34	2.56046	4.39798	3.39101	2.89924
A_33_P3268868		(NA)							-1.28	0.27	2.21	-1.55	0.91	0.98	0.98	1.33	2.07	0.25	3.73	1.6	3.24	3.19	2.55486	4.49221	3.21387	2.28422
IL12RB1	interleukin 12 receptor, beta 1	protein coding	ENSG00000096996	3594	04060|04630|05321	GO:0001916|GO:0002230|GO:0002827|GO:0004896|GO:0007165|GO:0019221|GO:0032729|GO:0035722|GO:0038155|GO:0042022|GO:0042104|GO:0043382|GO:0071346|GO:0072536|GO:2000318|GO:2000330	miR-1273h-5p|miR-1283|miR-1285-3p|miR-1911-5p|miR-196a-3p|miR-30b-3p|miR-3187-5p|miR-363-5p|miR-3689a-3p|miR-3689b-3p|miR-3689c|miR-371b-5p|miR-373-5p|miR-4284|miR-4419b|miR-4433a-3p|miR-4478|miR-4505|miR-450a-2-3p|miR-4684-5p|miR-485-5p|miR-5189-5p|miR-5692a|miR-5787|miR-612|miR-6134|miR-616-5p|miR-6745|miR-6779-5p|miR-6780a-5p|miR-6857-5p|miR-6860|miR-6861-5p|miR-6880-5p|miR-6884-5p|miR-939-3p		-1.13	-0.25	0.57	-0.88	0.8	0.87	0.87	1.18	2.07	0.26	0.74	0.87	1.29	2.88	2.69067	3.51651	2.38211	2.94245
SMIM17	small integral membrane protein 17	protein coding	ENSG00000268182	147670			miR-1258|miR-1285-5p|miR-1295b-3p|miR-1323|miR-1324|miR-138-2-3p|miR-141-5p|miR-142-5p|miR-24-1-5p|miR-24-2-5p|miR-29a-3p|miR-29b-3p|miR-29c-3p|miR-3123|miR-3133|miR-3143|miR-3187-5p|miR-3194-5p|miR-340-5p|miR-3605-3p|miR-3611|miR-3613-3p|miR-3646|miR-3662|miR-3688-3p|miR-371b-5p|miR-373-5p|miR-3910|miR-3926|miR-4253|miR-4261|miR-4269|miR-4282|miR-4307|miR-4311|miR-4329|miR-4452|miR-4492|miR-4662…		-0.97	0.13	0.55	-1.1	0.69	0.74	0.74	1.01	2.07	0.14	0.87	1.45	1.22	2.65	2.70322	3.12968	2.15926	2.57729
ZNF816-ZNF321P	ZNF816-ZNF321P readthrough	protein coding	ENSG00000221874	100529240			miR-1255b-2-3p|miR-1273a|miR-1273h-5p|miR-1285-3p|miR-146b-3p|miR-208a-5p|miR-208b-5p|miR-24-3p|miR-30b-3p|miR-342-5p|miR-3613-3p|miR-3685|miR-3689a-3p|miR-3689b-3p|miR-3689c|miR-371b-5p|miR-373-5p|miR-3925-3p|miR-4478|miR-4664-5p|miR-485-5p|miR-5095|miR-510-3p|miR-616-5p|miR-6720-3p|miR-6745|miR-6769a-5p|miR-6778-3p|miR-6779-5p|miR-6780a-5p|miR-6830-3p|miR-6873-3p|miR-6884-5p|miR-875-5p		-0.88	-0.07	0.76	-0.81	0.63	0.68	0.68	0.92	2.07	0.09	1.52	1.09	1.55	2.59	2.37045	3.20039	2.31904	2.44364
A_33_P3406265		(NA)							1.02	0.25	-0.34	0.77	0.72	0.78	0.78	1.06	2.07	0.3	0.43	0.84	1.27	2.4	2.48684	1.90078	2.91835	2.23667
A_33_P3250263		(NA)							0.8	-0.18	-0.35	0.98	0.57	0.62	0.62	0.84	2.07	0.26	0.6	1.61	1.33	2.34	2.17862	2.00733	2.81143	2.3541
ENSG00000242021		lincRNA	ENSG00000242021						0.84	-0.18	-0.32	1.01	0.59	0.64	0.64	0.87	2.07	0.24	0.52	1.59	1.36	2.31	2.12751	1.98109	2.81615	2.30282
A_21_P0008918		(NA)							-0.85	-0.03	0.49	-0.82	0.6	0.65	0.65	0.89	2.07	0.03	0.88	1.17	1.22	2.25	2.19309	2.70892	1.86003	2.22332
A_22_P00024714		(NA)							-0.67	-0.2	0.45	-0.47	0.47	0.51	0.51	0.7	2.07	0.37	1.1	0.77	1.53	2.2	1.99735	2.644	1.97742	2.19357
SPHK1	sphingosine kinase 1	protein coding	ENSG00000176170	8877	00600|01100|04020|04071|04072|04370|04666|05152	GO:0000287|GO:0003376|GO:0003677|GO:0005515|GO:0005516|GO:0005524|GO:0005737|GO:0005829|GO:0005886|GO:0006457|GO:0006665|GO:0006670|GO:0007165|GO:0008481|GO:0010800|GO:0010803|GO:0017050|GO:0019722|GO:0030148|GO:0030307|GO:0030335|GO:0031398|GO:0035556|GO:0038036|GO:0042346|GO:0043066|GO:0044267|GO:0044281|GO:0045766|GO:0045931|GO:0045987|GO:0046512|GO:0046834|GO:0048010|GO:0048146|GO:0051084|GO:…	miR-124-3p|miR-4279|miR-4447|miR-4505|miR-506-3p|miR-5196-5p|miR-5787|miR-659-3p		0.95	-0.19	0.68	1.14	0.68	0.73	0.73	1	2.06	0.23	1.17	1.57	3.83	10.98	10.2236	11.0889	12.042	10.4127
ALG5	ALG5, dolichyl-phosphate beta-glucosyltransferase	protein coding	ENSG00000120697	29880	00510|01100	GO:0004576|GO:0005789|GO:0006486|GO:0006488|GO:0016020|GO:0018279|GO:0043687|GO:0044267	miR-1910-3p|miR-3714|miR-4501|miR-6083|miR-6511a-5p		0.64	0.12	-0.64	0.52	0.45	0.49	0.49	0.67	2.06	0.21	1.87	0.93	1.95	10.75	11.0032	10.244	10.8835	10.8865
A_21_P0013921		(NA)							0.6	0.17	-0.76	0.44	0.43	0.46	0.46	0.63	2.06	0.34	2.51	0.79	2.73	9.37	9.74121	8.81325	9.41746	9.57433
SMG1	SMG1 phosphatidylinositol 3-kinase-related kinase	protein coding	ENSG00000157106	23049	03015	GO:0000184|GO:0000723|GO:0004672|GO:0004674|GO:0005515|GO:0005634|GO:0005737|GO:0005829|GO:0006406|GO:0006950|GO:0010467|GO:0018105|GO:0042162|GO:0044822|GO:0046777|GO:0046854	let-7a-2-3p|let-7g-3p|miR-103b|miR-1178-5p|miR-1208|miR-1249-5p|miR-1250-3p|miR-125a-5p|miR-125b-5p|miR-1278|miR-128-3p|miR-129-5p|miR-1292-5p|miR-1301-3p|miR-138-5p|miR-142-3p|miR-143-5p|miR-1468-3p|miR-148a-5p|miR-153-5p|miR-16-2-3p|miR-183-3p|miR-18a-5p|miR-18b-5p|miR-193b-5p|miR-195-3p|miR-197-3p|miR-19a-3p|miR-19b-3p|miR-205-3p|miR-2053|miR-21-3p|miR-2115-3p|miR-212-5p|miR-216a-3p|miR-216a-5…		-0.91	-0.37	1.97	-0.54	0.65	0.7	0.7	0.95	2.06	0.55	4.77	0.61	5.45	8.14	7.06888	9.40299	8.49433	7.43612
CCND3	cyclin D3	protein coding	ENSG00000112576	896	04110|04115|04151|04310|04390|04510|04630|05162|05166|05203	GO:0000307|GO:0001934|GO:0005515|GO:0005654|GO:0005737|GO:0005886|GO:0005925|GO:0019901|GO:0045737	miR-1207-5p|miR-1225-3p|miR-124-3p|miR-3126-5p|miR-3154|miR-330-3p|miR-3909|miR-3943|miR-4254|miR-4270|miR-4283|miR-4291|miR-4441|miR-4443|miR-4469|miR-4516|miR-4660|miR-4705|miR-4763-3p|miR-486-3p|miR-506-3p|miR-586|miR-642a-5p|miR-646|miR-6754-5p|miR-6808-5p|miR-6852-3p|miR-6873-5p|miR-6875-5p|miR-6881-3p|miR-6887-3p|miR-6893-5p|miR-939-3p|miR-940		0.88	-0.05	-1.13	0.93	0.62	0.67	0.67	0.92	2.06	0.06	2.59	1.33	2.26	7.86	8.1935	7.11676	7.99459	8.24581
FRMD4A	FERM domain containing 4A	protein coding	ENSG00000151474	55691			miR-1245b-5p|miR-1252-3p|miR-1284|miR-138-5p|miR-141-3p|miR-1468-3p|miR-149-5p|miR-1827|miR-186-5p|miR-19a-3p|miR-19a-5p|miR-19b-1-5p|miR-19b-2-5p|miR-19b-3p|miR-200a-3p|miR-200b-3p|miR-200c-3p|miR-302a-3p|miR-302b-3p|miR-302c-3p|miR-302d-3p|miR-302e|miR-3064-5p|miR-30c-1-3p|miR-30c-2-3p|miR-3129-3p|miR-3142|miR-335-3p|miR-34a-5p|miR-34c-5p|miR-3679-3p|miR-371b-5p|miR-372-3p|miR-373-3p|miR-373-5p…	DDX51|DHX8|EPAS1|LBX1|MBD6|MYCN|NARG1|POLL|PRH1|SCT|SSBP3|TRIM5|TTC28|ZNF286A|ZNF423|ZNF771	-1.38	-0.13	5.45	-1.25	0.98	1.06	1.06	1.44	2.06	0.1	8.24	1.07	8.92	7.75	5.11492	10.6891	9.30942	5.24241
Hs.510635		(NA)							0.64	-0.22	-0.69	0.86	0.46	0.49	0.49	0.67	2.06	0.44	2.04	1.82	1.6	7.09	7.12163	6.6544	7.29571	7.34098
SNORD114-3	small nucleolar RNA, C/D box 114-3	other ncRNA	ENSG00000201839	767579					-1.18	-0.57	1.51	-0.61	0.84	0.91	0.91	1.24	2.06	0.69	2.57	0.51	3.2	6.59	5.67887	7.76083	6.58079	6.24599
KIAA0930	KIAA0930	protein coding	ENSG00000100364	23313			let-7a-5p|let-7b-5p|let-7c-5p|let-7d-5p|let-7e-5p|let-7f-5p|let-7g-5p|let-7i-5p|miR-103a-3p|miR-107|miR-1205|miR-1224-3p|miR-1271-3p|miR-1273g-3p|miR-1286|miR-1294|miR-1299|miR-138-5p|miR-145-5p|miR-149-3p|miR-1587|miR-15a-5p|miR-15b-5p|miR-16-5p|miR-1827|miR-186-3p|miR-1909-3p|miR-1910-3p|miR-1915-3p|miR-195-5p|miR-2115-5p|miR-214-3p|miR-22-5p|miR-2355-5p|miR-24-3p|miR-2682-5p|miR-3064-5p|miR-31…		0.82	0.54	-0.11	0.28	0.59	0.63	0.63	0.86	2.06	1.06	0.14	0.3	1.6	6.01	6.24211	5.59046	6.41423	5.69893
A_33_P3346533		(NA)							1.35	0.75	-1.22	0.6	0.96	1.04	1.04	1.42	2.06	0.83	1.62	0.42	2.4	5.49	6.33338	4.35964	5.71309	5.58293
ANAPC2	anaphase promoting complex subunit 2	protein coding	ENSG00000176248	29882	04110|04114|04120|04914|05166	GO:0000278|GO:0005654|GO:0005680|GO:0005829|GO:0007094|GO:0031145|GO:0031915|GO:0051436|GO:0051437|GO:0051439|GO:0070979|GO:0090129	miR-4447|miR-4767|miR-6836-5p	C7orf27|CIZ1	0.95	0.07	-0.62	0.87	0.67	0.73	0.73	0.99	2.06	0.08	1.05	1.1	1.29	4.19	4.32458	3.62849	4.57622	4.2506
LINC00597	lincRNA 597	lincRNA							-1.27	-0.89	1.82	-0.38	0.9	0.98	0.98	1.33	2.06	1.14	2.97	0.26	4.07	3.85	2.56298	5.26944	4.00084	3.44825
A_33_P3321130		(NA)							-1.44	-0.48	1.29	-0.96	1.02	1.11	1.11	1.51	2.06	0.43	1.6	0.7	1.96	3.69	3.03561	4.80491	3.365	3.51773
CD99P1	CD99 molecule pseudogene 1	pseudogene	ENSG00000223773	401577					-1.31	0.25	0.85	-1.56	0.93	1	1	1.37	2.06	0.22	1.05	1.55	1.24	3.47	3.54553	4.14786	2.84282	3.2937
A_21_P0011532		(NA)							1.3	0.31	-0.19	1	0.93	1	1	1.36	2.06	0.28	0.16	0.85	1.35	3.12	3.0954	2.59646	3.90069	2.78723
A_21_P0011185		(NA)							-0.92	0.2	1.32	-1.12	0.66	0.71	0.71	0.97	2.06	0.25	2.96	1.59	2.44	3.01	2.69512	3.8211	2.89928	2.49897
Hs.585761		(NA)							0.94	0.55	-0.09	0.39	0.67	0.73	0.73	0.99	2.06	0.9	0.1	0.38	1.53	2.88	3.08757	2.44271	3.38698	2.5353
A_33_P3273752		(NA)							-0.75	0.78	1.05	-1.53	0.53	0.58	0.58	0.79	2.06	1.95	2.89	3.12	2.3	2.55	2.75928	3.03429	2.28372	1.9803
SERINC4	serine incorporator 4	protein coding	ENSG00000184716	619189			miR-145-5p|miR-194-5p|miR-2392|miR-3201|miR-4483|miR-4492|miR-4690-3p|miR-5195-3p|miR-548b-3p|miR-5685		-1.15	-0.38	0.65	-0.78	0.82	0.88	0.88	1.2	2.06	0.42	0.85	0.72	1.43	2.41	2.09252	3.11421	1.96302	2.46819
TMBIM4	transmembrane BAX inhibitor motif containing 4	protein coding	ENSG00000155957	51643		GO:0005515|GO:0005795|GO:0043066|GO:0050848	miR-150-5p|miR-16-2-3p|miR-186-5p|miR-195-3p|miR-1972|miR-202-3p|miR-219b-3p|miR-22-5p|miR-3143|miR-4305|miR-4503|miR-508-3p|miR-513b-3p|miR-548p|miR-5571-5p|miR-5580-3p|miR-561-5p|miR-5680|miR-607|miR-6852-3p|miR-7114-5p	EGR2|PARP2|PHF11	0.61	0.07	-0.51	0.54	0.43	0.47	0.47	0.64	2.05	0.12	1.45	1.02	1.53	10.8	10.9597	10.3819	10.9892	10.8883
KLF3	Kruppel-like factor 3 (basic)	protein coding	ENSG00000109787	51274	05202	GO:0005515|GO:0007275	let-7a-3p|let-7b-3p|let-7f-1-3p|miR-101-3p|miR-106a-5p|miR-106b-5p|miR-1224-3p|miR-1245b-3p|miR-1271-5p|miR-1277-5p|miR-1278|miR-1286|miR-1287-5p|miR-130a-5p|miR-135a-5p|miR-135b-5p|miR-153-3p|miR-17-5p|miR-190a-3p|miR-20a-5p|miR-20b-5p|miR-21-5p|miR-2114-5p|miR-217|miR-2355-5p|miR-23a-3p|miR-23b-3p|miR-23c|miR-300|miR-302a-3p|miR-302b-3p|miR-302c-3p|miR-302d-3p|miR-302e|miR-30a-3p|miR-30d-3p|miR…		-0.91	-0.35	0.06	-0.57	0.65	0.7	0.7	0.96	2.05	0.5	0.06	0.64	1.43	7.31	7.27363	7.67808	6.76333	7.62047
PALM3	paralemmin 3	protein coding	ENSG00000187867	342979		GO:0001960|GO:0005515|GO:0008063|GO:0032496	miR-1297|miR-26a-5p|miR-26b-5p|miR-4465|miR-4500|miR-5095|miR-6776-5p|miR-7151-3p		1.15	-0.46	0.89	1.61	0.82	0.88	0.88	1.2	2.05	0.55	1.32	1.93	4.39	5.32	4.1952	5.55083	6.69761	4.6597
DBIL5P2	diazepam binding inhibitor-like 5 pseudogene 2	pseudogene	ENSG00000242412	100169989					-1.27	-0.12	2.2	-1.15	0.91	0.98	0.98	1.34	2.05	0.1	3.71	1.06	3.7	4.8	3.87073	6.19841	4.92698	3.99552
A_33_P3421418		(NA)							-0.99	-0.08	0.15	-0.91	0.71	0.76	0.76	1.04	2.05	0.08	0.16	1.08	1.39	4.53	4.65169	4.87856	3.89199	4.73316
A_21_P0014763		(NA)							1.01	0.33	0.21	0.69	0.72	0.78	0.78	1.06	2.05	0.41	0.24	0.72	1.83	4.22	4.07893	3.96128	4.97571	3.74985
TDRD9	tudor domain containing 9	protein coding	ENSG00000156414	122402		GO:0005634|GO:0007140|GO:0007283|GO:0009566|GO:0010467|GO:0031047|GO:0034587|GO:0043046|GO:0071547	miR-186-3p|miR-194-5p|miR-29a-5p|miR-3148|miR-4443|miR-4446-5p|miR-4455|miR-500a-5p|miR-548c-3p|miR-548u|miR-589-3p|miR-6508-5p|miR-7161-5p|miR-8067		-1.06	-0.31	-0.3	-0.76	0.76	0.82	0.82	1.12	2.05	0.35	0.34	0.77	1.99	3.32	3.53932	3.54647	2.48224	3.84569
A_21_P0011312		(NA)							-1.29	-0.54	1.13	-0.74	0.92	0.99	0.99	1.35	2.05	0.58	1.54	0.58	2.06	3.06	2.40171	4.07004	2.78395	2.94441
A_33_P3390226		(NA)							0.87	0.27	-0.1	0.6	0.62	0.67	0.67	0.92	2.05	0.38	0.13	0.74	1.36	2.61	2.63099	2.26037	3.13092	2.36394
KDELR2	KDEL (Lys-Asp-Glu-Leu) endoplasmic reticulum protein retention receptor 2	protein coding	ENSG00000136240	11014	05110	GO:0005046|GO:0005783|GO:0005794|GO:0006886|GO:0070062	miR-1193|miR-1249-5p|miR-127-5p|miR-1273h-3p|miR-138-5p|miR-142-3p|miR-186-5p|miR-192-3p|miR-200c-5p|miR-2392|miR-3065-5p|miR-3200-5p|miR-3605-5p|miR-3609|miR-3613-3p|miR-3620-3p|miR-3688-3p|miR-3692-3p|miR-374c-5p|miR-383-3p|miR-4303|miR-4325|miR-4330|miR-4418|miR-4419a|miR-4510|miR-4535|miR-4680-3p|miR-4716-5p|miR-4760-3p|miR-4772-3p|miR-4779|miR-509-3-5p|miR-509-5p|miR-548ah-5p|miR-548c-3p|miR…	ANAPC5|ATF1|BTRC|CHD6|FOXK2|FOXN2|GRSF1|HEATR2|POLR2E|PSPC1|RBM14|RPAP3|STIP1|SYNJ1|ZDHHC17|ZFYVE1|ZNF192|ZNF317	0.81	0.1	-0.65	0.71	0.58	0.62	0.62	0.85	2.04	0.12	1.37	1.02	1.48	11.16	11.3647	10.6196	11.4269	11.2693
CALM1	calmodulin 1 (phosphorylase kinase, delta)	protein coding	ENSG00000198668	801	04014|04015|04020|04022|04024|04070|04114|04261|04270|04713|04720|04722|04728|04740|04744|04750|04910|04912|04915|04916|04921|04922|04924|04925|04970|04971|05010|05031|05034|05133|05152|05214	GO:0000165|GO:0000186|GO:0000922|GO:0002027|GO:0002223|GO:0002576|GO:0005509|GO:0005513|GO:0005515|GO:0005576|GO:0005634|GO:0005654|GO:0005737|GO:0005813|GO:0005829|GO:0005876|GO:0005886|GO:0005975|GO:0005980|GO:0006006|GO:0006936|GO:0007165|GO:0007173|GO:0007186|GO:0007202|GO:0007264|GO:0007265|GO:0007268|GO:0007411|GO:0007596|GO:0007603|GO:0008286|GO:0008543|GO:0010800|GO:0010801|GO:0010880|GO:…	miR-105-5p|miR-1244|miR-1250-3p|miR-1277-5p|miR-129-5p|miR-147a|miR-153-5p|miR-190a-3p|miR-196a-5p|miR-196b-5p|miR-19a-5p|miR-19b-1-5p|miR-19b-2-5p|miR-3123|miR-3148|miR-3158-5p|miR-3168|miR-33a-3p|miR-340-5p|miR-3613-3p|miR-374c-5p|miR-3924|miR-424-3p|miR-4291|miR-4311|miR-4428|miR-4441|miR-450b-5p|miR-4531|miR-4659a-3p|miR-4659b-3p|miR-4666a-3p|miR-4668-5p|miR-4674|miR-4688|miR-4700-3p|miR-4715…	EEF1G|KLC3	0.77	-0.18	0.39	0.95	0.55	0.67	0.67	0.87	2.04	0.24	0.62	1.47	2.97	7.17	6.60184	7.17029	7.9368	6.78396
TRIM52-AS1	TRIM52 antisense RNA 1 (head to head)	asRNA							-1.15	0.1	0.03	-1.24	0.82	0.89	0.89	1.21	2.04	0.09	0.03	1.35	1.72	5.5	5.86408	5.79542	4.65038	5.76513
Hs.744892		(NA)							-2.27	-0.15	3.58	-2.12	1.62	1.75	1.75	2.39	2.04	0.07	3.31	1.11	3.2	5.14	3.72102	7.45397	5.18307	3.87031
Hs.591633		(NA)							-1.53	0.3	2.31	-1.83	1.1	1.18	1.18	1.61	2.04	0.22	3.13	1.54	2.62	3.74	3.13606	5.14426	3.61401	2.83774
OR8H1	olfactory receptor, family 8, subfamily H, member 1	protein coding	ENSG00000181693	219469	04740	GO:0005886			0.79	-0.46	-0.28	1.24	0.56	0.61	0.61	0.83	2.04	0.88	0.46	2.24	1.91	2.38	1.98135	2.15634	2.94447	2.43712
SIRT2	sirtuin 2	protein coding	ENSG00000068903	22933		GO:0000122|GO:0003682|GO:0004407|GO:0005515|GO:0005634|GO:0005694|GO:0005720|GO:0005737|GO:0005813|GO:0005814|GO:0005819|GO:0005829|GO:0005874|GO:0006476|GO:0008134|GO:0008270|GO:0008285|GO:0010507|GO:0010801|GO:0014065|GO:0016575|GO:0017136|GO:0022011|GO:0030496|GO:0031641|GO:0032436|GO:0033010|GO:0033270|GO:0033558|GO:0034599|GO:0034979|GO:0034983|GO:0035035|GO:0035729|GO:0042177|GO:0042826|GO:…	miR-1275|miR-1303|miR-140-5p|miR-4283|miR-4419a|miR-4445-5p|miR-4447|miR-4492|miR-4665-5p|miR-4757-5p|miR-6744-3p|miR-6793-5p|miR-6805-5p|miR-6825-5p|miR-6878-3p|miR-7155-5p	APAF1|SPAG7	0.72	-0.38	-1.7	1.1	0.51	0.55	0.55	0.75	2.04	0.78	5.19	2.15	4.57	5.45	5.88426	4.56802	5.28381	6.26398
A_33_P3325871		(NA)							-0.92	-0.03	1.2	-0.9	0.66	0.71	0.71	0.97	2.04	0.03	2.6	1.16	2.39	3.09	2.67862	3.90435	2.98347	2.70368
LOC100507071	uncharacterized LOC100507071	other ncRNA							1.08	0.2	-0.59	0.88	0.78	0.84	0.84	1.14	2.04	0.21	0.81	0.92	1.26	2.88	3.05333	2.26084	3.34354	2.85301
RASSF3	Ras association (RalGDS/AF-6) domain family member 3	protein coding	ENSG00000153179	283349		GO:0005515|GO:0005737|GO:0005886|GO:0042802	let-7c-3p|miR-124-3p|miR-1252-5p|miR-1297|miR-1306-5p|miR-138-1-3p|miR-141-5p|miR-1468-3p|miR-146b-3p|miR-149-3p|miR-15a-3p|miR-17-3p|miR-1913|miR-199a-5p|miR-199b-5p|miR-2114-5p|miR-2117|miR-219a-5p|miR-22-3p|miR-25-3p|miR-26a-5p|miR-26b-5p|miR-301a-5p|miR-301b-5p|miR-302c-5p|miR-3121-3p|miR-3124-3p|miR-3127-3p|miR-3133|miR-3153|miR-3173-3p|miR-3175|miR-3189-3p|miR-32-5p|miR-3200-5p|miR-324-3p|m…		0.85	-0.3	0	1.15	0.61	0.66	0.66	0.89	2.04	0.46	0	1.83	2.21	2.8	2.34989	2.65295	3.49898	2.65167
A_33_P3288605		(NA)							-0.88	0.47	0.68	-1.35	0.63	0.68	0.68	0.93	2.04	0.79	1.28	2.16	1.46	2.51	2.72927	2.93325	2.0506	2.25732
HOXA1	homeobox A1	protein coding	ENSG00000105991	3198		GO:0005515|GO:0007275|GO:0007605|GO:0007634|GO:0009653|GO:0021599|GO:0042473|GO:0048702|GO:0048839|GO:0048844|GO:0050795|GO:0050890|GO:0050905|GO:0060840|GO:0060876|GO:0090102|GO:0090103	let-7a-2-3p|let-7g-3p|miR-10a-5p|miR-10b-5p|miR-1206|miR-1252-5p|miR-130a-5p|miR-149-3p|miR-1587|miR-181a-5p|miR-181b-5p|miR-181c-5p|miR-181d-5p|miR-182-5p|miR-183-3p|miR-216b-5p|miR-218-5p|miR-2355-5p|miR-23a-3p|miR-23b-3p|miR-23c|miR-28-5p|miR-30a-5p|miR-30b-5p|miR-30c-5p|miR-30d-5p|miR-30e-5p|miR-3139|miR-3140-3p|miR-3160-3p|miR-3175|miR-3190-3p|miR-340-5p|miR-342-3p|miR-3607-3p|miR-3620-3p|mi…		1.17	0.08	-0.17	1.09	0.83	0.9	0.9	1.23	2.04	0.07	0.16	1.1	1.39	2.67	2.50506	2.25502	3.42079	2.42679
HLA-F-AS1	HLA-F antisense RNA 1	other ncRNA	ENSG00000230017						1.01	-0.34	-0.6	1.35	0.72	0.78	0.78	1.07	2.04	0.43	0.91	1.79	1.31	2.64	2.44128	2.17716	3.18906	2.78048
A_22_P00003490		(NA)							0.7	-0.05	-0.21	0.75	0.5	0.54	0.54	0.74	2.04	0.07	0.38	1.33	1.3	2.41	2.29849	2.13286	2.8331	2.34611
A_33_P3421674		(NA)							-0.81	-0.57	-0.28	-0.24	0.58	0.63	0.63	0.85	2.04	1.13	0.44	0.26	1.99	2.4	2.3453	2.63299	1.8221	2.91159
S100A13	S100 calcium binding protein A13	protein coding	ENSG00000189171	6284		GO:0005507|GO:0005509|GO:0005515|GO:0005615|GO:0005634|GO:0005737|GO:0005829|GO:0008270|GO:0017134|GO:0042803|GO:0043123|GO:0048471|GO:0050663|GO:0050703|GO:0050786|GO:0070062			-0.64	-0.21	-0.12	-0.44	0.46	0.5	0.5	0.68	2.03	0.41	0.2	0.71	1.74	12.46	12.5411	12.6325	11.9894	12.7491
C8orf44-SGK3	C8orf44-SGK3 readthrough	protein coding	ENSG00000270024	100533105	04068|04151	GO:0001558|GO:0004672|GO:0005246|GO:0005515|GO:0005829|GO:0006468|GO:0006950|GO:0015459|GO:0017080|GO:0017081|GO:0030334|GO:0034220|GO:0042127|GO:0051090|GO:0055085	miR-1180-5p|miR-1229-5p|miR-126-5p|miR-132-3p|miR-144-3p|miR-153-3p|miR-155-5p|miR-181a-5p|miR-181b-5p|miR-181c-5p|miR-181d-5p|miR-2054|miR-208a-5p|miR-208b-5p|miR-2116-5p|miR-212-3p|miR-2681-3p|miR-302a-5p|miR-3121-3p|miR-3148|miR-3158-5p|miR-335-3p|miR-365a-3p|miR-365b-3p|miR-377-3p|miR-3977|miR-4251|miR-4262|miR-4263|miR-4286|miR-4509|miR-4639-5p|miR-4677-5p|miR-4678|miR-4691-5p|miR-4712-5p|mi…		-0.83	0.02	1.17	-0.85	0.6	0.64	0.64	0.88	2.03	0.02	2.88	1.25	2.59	9.45	9.06282	10.2141	9.38638	9.04152
PDE4DIP	phosphodiesterase 4D interacting protein	protein coding	ENSG00000178104	9659		GO:0005515|GO:0005634|GO:0005737|GO:0005794|GO:0005813|GO:0019899|GO:0030016|GO:0043623	miR-1264|miR-1273c|miR-181a-2-3p|miR-3126-3p|miR-4265|miR-4296|miR-4322|miR-4491|miR-4643|miR-4657|miR-6516-3p|miR-6724-5p|miR-6773-5p	GPSM1|NLE1|PLEK2|QKI|TRAF4|USH1G	1.58	-0.45	-3.74	2.03	1.14	1.23	1.23	1.67	2.03	0.35	5.17	1.69	4.84	8.89	10.1367	6.84667	8.42792	10.5874
DOLPP1	dolichyldiphosphatase 1	protein coding	ENSG00000167130	57171	00510	GO:0005789|GO:0006487|GO:0006488|GO:0006489|GO:0018279|GO:0030176|GO:0043687|GO:0044267|GO:0047874	miR-1207-5p|miR-1252-3p|miR-1286|miR-129-1-3p|miR-129-2-3p|miR-129-5p|miR-1299|miR-133a-3p|miR-133b|miR-149-3p|miR-152-5p|miR-1537-5p|miR-15a-5p|miR-15b-5p|miR-16-5p|miR-195-5p|miR-214-3p|miR-218-5p|miR-29a-3p|miR-29b-3p|miR-29c-3p|miR-302b-5p|miR-302d-5p|miR-30a-5p|miR-30b-5p|miR-30c-5p|miR-30d-5p|miR-30e-5p|miR-3144-5p|miR-3155a|miR-3155b|miR-3164|miR-3184-5p|miR-361-3p|miR-3614-5p|miR-3619-5p|…	NAT10	0.86	0.4	0.46	0.46	0.62	0.67	0.67	0.91	2.03	0.65	0.78	0.52	2.41	7.73	7.54766	7.60552	8.46602	7.14605
Hs.654689		(NA)							-0.63	-0.15	0.49	-0.48	0.46	0.49	0.49	0.67	2.03	0.28	1.29	0.83	1.57	7.69	7.48957	8.13282	7.49923	7.64245
MAP3K5	mitogen-activated protein kinase kinase kinase 5	protein coding	ENSG00000197442	4217	04010|04071|04141|04668|04722|04932|05014	GO:0000165|GO:0000186|GO:0000287|GO:0004672|GO:0004709|GO:0005515|GO:0005524|GO:0005829|GO:0006468|GO:0007254|GO:0007257|GO:0008631|GO:0019903|GO:0034976|GO:0042803|GO:0043065|GO:0043280|GO:0043507|GO:0046330|GO:0070059|GO:0070301|GO:0097190|GO:1901216|GO:1902911|GO:1990604	let-7f-2-3p|miR-106a-5p|miR-106b-5p|miR-1185-1-3p|miR-1185-2-3p|miR-1243|miR-1258|miR-130a-5p|miR-16-2-3p|miR-17-5p|miR-181a-3p|miR-195-3p|miR-199a-3p|miR-199b-3p|miR-20a-5p|miR-20b-5p|miR-222-5p|miR-23a-3p|miR-23b-3p|miR-23c|miR-30a-5p|miR-30b-5p|miR-30c-5p|miR-30d-5p|miR-30e-5p|miR-3129-5p|miR-3606-3p|miR-371a-5p|miR-378j|miR-425-5p|miR-4302|miR-4330|miR-4742-3p|miR-4753-3p|miR-4775|miR-513a-3p…	TRIM10|ZNF804B	-1.29	-0.91	0.63	-0.38	0.92	1	1	1.36	2.03	1.15	0.7	0.25	1.92	7	6.34047	7.88156	6.5949	7.2503
UBAC2	UBA domain containing 2	protein coding	ENSG00000134882	337867		GO:0005515|GO:0005783|GO:0070972|GO:1904153	miR-1226-5p|miR-1254|miR-1825|miR-200b-3p|miR-200c-3p|miR-3065-3p|miR-3116|miR-3173-5p|miR-365a-3p|miR-365b-3p|miR-3680-3p|miR-4262|miR-429|miR-4303|miR-4445-3p|miR-4469|miR-4470|miR-4490|miR-4492|miR-4732-3p|miR-5197-5p|miR-548ae-3p|miR-548ah-3p|miR-548aj-3p|miR-548al|miR-548am-3p|miR-548aq-3p|miR-548j-3p|miR-548x-3p|miR-5582-3p|miR-5700|miR-589-3p|miR-604|miR-642a-5p|miR-6507-3p|miR-6721-5p|miR…	E2F4|INHBC|MBNL1|NLRP1|RNF170|TFCP2	0.63	-0.01	-0.88	0.63	0.45	0.49	0.49	0.67	2.03	0.01	2.84	1.22	2.57	6.78	7.07984	6.20442	6.8337	7.08529
Hs.677214		(NA)							-0.99	0.08	2.78	-1.07	0.72	0.77	0.77	1.05	2.03	0.08	6.07	1.33	6.21	6.75	5.59119	8.29038	7.29738	5.51391
DIP2B	DIP2 disco-interacting protein 2 homolog B (Drosophila)	protein coding	ENSG00000066084	57609		GO:0005634|GO:0005737|GO:0016020|GO:0070062	miR-101-3p|miR-1183|miR-1227-5p|miR-1236-3p|miR-1245b-3p|miR-1254|miR-1255a|miR-1255b-5p|miR-126-5p|miR-1264|miR-1285-3p|miR-1295b-5p|miR-1296-3p|miR-1301-3p|miR-141-3p|miR-142-5p|miR-143-3p|miR-1468-3p|miR-153-5p|miR-16-2-3p|miR-181a-5p|miR-181b-5p|miR-181c-5p|miR-181d-5p|miR-1827|miR-188-3p|miR-18a-3p|miR-1912|miR-1915-3p|miR-194-3p|miR-195-3p|miR-200a-3p|miR-203a-3p|miR-203a-5p|miR-204-3p|miR-…		0.82	-0.17	0.5	0.99	0.59	0.64	0.64	0.87	2.03	0.23	0.92	1.55	3.49	6.69	6.07972	6.74278	7.56758	6.24669
LOC101928053	uncharacterized LOC101928053	asRNA	ENSG00000246308	101928053					-1.01	-0.11	0.68	-0.9	0.72	0.78	0.78	1.07	2.03	0.11	1.09	1.03	1.31	4.95	4.77119	5.56424	4.55752	4.8793
FOXP1-IT1	FOXP1 intronic transcript 1	lncRNA	ENSG00000242094						-1.47	-0.51	3.43	-0.96	1.05	1.14	1.14	1.55	2.03	0.45	5.11	0.68	5.73	4.29	2.47285	6.41726	4.94918	2.98311
NUDCD1	NudC domain containing 1	protein coding	ENSG00000120526	84955		GO:0005515|GO:0005634|GO:0005737	miR-1208|miR-1277-5p|miR-129-5p|miR-1303|miR-1304-3p|miR-141-3p|miR-153-5p|miR-154-3p|miR-181a-2-3p|miR-181b-2-3p|miR-181b-3p|miR-200a-3p|miR-208a-5p|miR-208b-5p|miR-2110|miR-2117|miR-219a-2-3p|miR-224-3p|miR-2355-3p|miR-2682-3p|miR-3065-5p|miR-31-5p|miR-3134|miR-3187-3p|miR-3688-3p|miR-4273|miR-4282|miR-4420|miR-4436b-5p|miR-450a-2-3p|miR-4668-5p|miR-4682|miR-4684-5p|miR-4712-5p|miR-4742-5p|miR-…	ANAPC1|BUB3|C13orf7|CCNB2|CCNJ|CDC20|CPSF6|DBF4|EIF2S1|H2AFZ|HEATR1|KARS|KPNA2|PNO1|PSMD12|PWP1|RBM28|RNF138|RPAP3|SEH1L|SFRS10|SNRPB2|SUGT1|SYNCRIP|TAF5|TEX10|TTC27|WDR12|WDSOF1|ZNF473|ZNF596|ZRF1	-0.96	0.25	0.74	-1.21	0.69	0.75	0.75	1.02	2.03	0.32	1.29	1.66	1.27	3.9	3.94896	4.43574	3.4762	3.69421
ENSG00000238117		asRNA	ENSG00000238117						-1.03	-0.36	2.03	-0.66	0.74	0.8	0.8	1.09	2.03	0.46	4.26	0.67	4.78	3.48	2.40959	4.80169	3.77491	2.77429
Hs.661297		(NA)							-1.32	-0.1	1.69	-1.22	0.95	1.02	1.02	1.39	2.03	0.08	2.54	1.08	2.41	3.41	2.7902	4.58071	3.26356	2.89197
A_33_P3210516		(NA)							-1.42	-0.01	1.65	-1.41	1.02	1.1	1.1	1.5	2.03	0.01	2.24	1.19	2.02	3.4	2.88437	4.54829	3.12662	2.89705
Hs.720223		(NA)							-1.02	0.26	0.74	-1.28	0.73	0.79	0.79	1.08	2.03	0.31	1.19	1.64	1.25	3.05	3.11283	3.59334	2.57552	2.85126
Hs.635880		(NA)							-0.87	-0.21	0.46	-0.67	0.63	0.68	0.68	0.92	2.03	0.27	0.77	0.84	1.28	2.99	2.83019	3.49763	2.62532	3.03536
A_21_P0014477		(NA)							0.97	0.2	0.03	0.77	0.7	0.75	0.75	1.03	2.03	0.24	0.03	0.88	1.56	2.87	2.74291	2.572	3.54422	2.5401
Hs.689306		(NA)							0.84	0.14	-0.59	0.7	0.6	0.65	0.65	0.89	2.03	0.19	1.14	0.93	1.39	2.75	2.94784	2.21419	3.05257	2.80448
EXOC3L2	exocyst complex component 3-like 2	protein coding	ENSG00000130201	90332			miR-1262|miR-1915-3p|miR-3182|miR-4270|miR-4441|miR-4455|miR-4701-3p|miR-504-3p|miR-5095|miR-6736-5p|miR-6764-5p|miR-6778-3p|miR-6805-5p|miR-7151-3p	LIMD1|PRB1|WDR31|ZMYND8	1.07	-0.29	-0.76	1.37	0.77	0.83	0.83	1.14	2.03	0.33	1.14	1.67	1.25	2.6	2.5006	2.03711	3.1086	2.79502
A_22_P00024648		(NA)							-0.72	0.08	0.47	-0.79	0.52	0.56	0.56	0.76	2.03	0.11	1.02	1.38	1.2	2.48	2.48127	2.87056	2.15257	2.40454
LINC00927	lincRNA 927	lincRNA	ENSG00000259361	283688					-0.7	-0.13	0.06	-0.57	0.51	0.55	0.55	0.75	2.03	0.21	0.08	0.9	1.4	2.46	2.52305	2.71504	2.01113	2.65761
MRPS16	mitochondrial ribosomal protein S16	protein coding	ENSG00000182180	51021	03010	GO:0003735|GO:0005515|GO:0005737|GO:0005739|GO:0005743|GO:0005763|GO:0006996|GO:0032543|GO:0070124|GO:0070125|GO:0070126	miR-1273g-3p|miR-1287-3p|miR-1301-5p|miR-188-5p|miR-1913|miR-224-5p|miR-3123|miR-324-3p|miR-340-3p|miR-3613-3p|miR-3671|miR-371b-5p|miR-373-5p|miR-4262|miR-4311|miR-4455|miR-4476|miR-4478|miR-4533|miR-4642|miR-4662a-5p|miR-4676-5p|miR-4691-3p|miR-4696|miR-505-3p|miR-5187-5p|miR-541-3p|miR-548l|miR-551b-5p|miR-5589-5p|miR-575|miR-586|miR-6069|miR-6124|miR-616-5p|miR-634|miR-639|miR-6502-5p|miR-654…	ARD1A|BOP1|CLPB|CSTF1|DARS2|DDX19B|FBXO22|MRPL23|MRPS12|MRPS17|NUP37|POLE4|POLR3K|PPIE|PRICKLE4|RABEPK|RNASEH1|RPA3|SIVA1|VARS|WDR18|WDR61|WDR77|ZNF593	-0.71	-0.13	1.39	-0.58	0.51	0.55	0.55	0.75	2.02	0.2	4.21	0.91	4.42	12.76	12.1168	13.6344	12.9253	12.2468
WNK4	WNK lysine deficient protein kinase 4	protein coding	ENSG00000126562	65266		GO:0004674|GO:0005515|GO:0005524|GO:0005923|GO:0006468|GO:0006811|GO:0019869|GO:0035556|GO:0050794|GO:0050801|GO:0070294|GO:0072156	miR-10b-3p|miR-1291|miR-1306-5p|miR-143-3p|miR-153-5p|miR-3120-3p|miR-3127-3p|miR-338-3p|miR-3689d|miR-4447|miR-4472|miR-4481|miR-4639-3p|miR-4711-5p|miR-4723-5p|miR-4763-3p|miR-4770|miR-541-3p|miR-5698|miR-6088|miR-6515-3p|miR-654-5p|miR-6756-3p|miR-6756-5p|miR-6766-5p|miR-6775-3p|miR-6796-5p|miR-6825-5p|miR-6837-3p|miR-6851-5p|miR-6870-5p|miR-7111-5p|miR-7150|miR-7977		2.43	-1.3	-1.49	3.73	1.75	1.89	1.89	2.58	2.02	0.78	0.94	2.13	1.5	4.13	3.32233	3.13256	5.56374	4.619
SSR2	signal sequence receptor, beta (translocon-associated protein beta)	protein coding	ENSG00000163479	6746	04141	GO:0005783|GO:0006412|GO:0006613|GO:0006614|GO:0010467|GO:0044267	miR-1207-5p|miR-1295b-5p|miR-135a-5p|miR-135b-5p|miR-1909-3p|miR-1912|miR-3065-3p|miR-30c-1-3p|miR-30c-2-3p|miR-3167|miR-3198|miR-3677-5p|miR-4294|miR-4309|miR-4319|miR-4514|miR-4692|miR-4749-3p|miR-4763-3p|miR-665|miR-6722-3p|miR-6788-5p|miR-6808-5p|miR-6825-5p|miR-6835-3p|miR-6893-5p|miR-8085|miR-876-5p|miR-887-5p|miR-940	HMG20B	0.77	0.17	0.32	0.59	0.55	0.6	0.6	0.81	2.02	0.26	0.56	0.85	2.32	10.69	10.443	10.5867	11.3534	10.2696
POLR1E	polymerase (RNA) I polypeptide E, 53kDa	protein coding	ENSG00000137054	64425	00230|00240|01100|03020	GO:0005634|GO:0005654|GO:0005730|GO:0006360|GO:0006361|GO:0006362|GO:0006363|GO:0009303|GO:0010467|GO:0040029|GO:0045814|GO:0045815	miR-4451|miR-4529-5p|miR-4694-3p|miR-5093|miR-5580-5p|miR-6747-3p|miR-6778-3p|miR-6815-3p|miR-7973|miR-876-5p		0.87	0.16	-0.93	0.71	0.63	0.68	0.68	0.93	2.02	0.21	1.99	0.91	2.04	7.6	7.98339	6.89044	7.76322	7.82214
MCEE	methylmalonyl CoA epimerase	protein coding	ENSG00000124370	84693	00280|00630|00640|01100|01200	GO:0004493|GO:0005515|GO:0005759|GO:0006635|GO:0019626|GO:0044255|GO:0044281|GO:0046491	miR-190a-3p|miR-2053|miR-3674|miR-3924|miR-4519|miR-4799-5p|miR-5692a|miR-5692b|miR-5692c|miR-6079|miR-642b-5p|miR-7-1-3p|miR-7-2-3p|miR-8068		-0.76	-0.01	-0.53	-0.75	0.55	0.59	0.59	0.81	2.02	0.01	1.12	1.18	3.38	7.6	8.07824	7.55177	6.79007	8.08624
LY9	lymphocyte antigen 9	protein coding	ENSG00000122224	4063		GO:0005886|GO:0032740|GO:0072540	miR-1303|miR-139-5p|miR-141-3p|miR-143-5p|miR-15a-5p|miR-15b-5p|miR-16-5p|miR-195-5p|miR-200a-3p|miR-424-5p|miR-4267|miR-4294|miR-4303|miR-4478|miR-497-5p|miR-5096|miR-615-5p|miR-634|miR-6796-5p|miR-6825-5p|miR-6838-5p		0.85	0.6	-1.97	0.25	0.61	0.66	0.66	0.9	2.02	1.14	5.07	0.25	6.28	7.51	8.77503	6.20128	7.04831	8.17556
TM4SF18	transmembrane 4 L six family member 18	protein coding	ENSG00000163762	116441			miR-1250-3p|miR-1288-3p|miR-1293|miR-1297|miR-143-5p|miR-153-5p|miR-208a-5p|miR-208b-5p|miR-2115-3p|miR-2116-3p|miR-217|miR-28-5p|miR-3139|miR-3160-5p|miR-3180-5p|miR-3606-5p|miR-3618|miR-3659|miR-3663-5p|miR-3680-3p|miR-3927-5p|miR-3978|miR-409-3p|miR-4265|miR-4282|miR-4291|miR-4296|miR-4322|miR-4437|miR-4452|miR-4483|miR-450b-5p|miR-4674|miR-4694-3p|miR-4724-5p|miR-4741|miR-4768-5p|miR-4775|miR…	ANKRD47|VWF	0.95	-0.54	-0.75	1.5	0.69	0.74	0.74	1.01	2.02	0.86	1.33	2.21	1.47	2.56	2.30552	2.09591	3.04816	2.84986
CNTN3	contactin 3 (plasmacytoma associated)	protein coding	ENSG00000113805	5067			miR-106a-3p|miR-10b-3p|miR-1270|miR-1277-5p|miR-1279|miR-137|miR-155-5p|miR-183-3p|miR-186-5p|miR-203a-3p|miR-20a-3p|miR-216b-5p|miR-217|miR-219a-1-3p|miR-3163|miR-3192-3p|miR-335-3p|miR-34b-3p|miR-3646|miR-3662|miR-3675-3p|miR-369-3p|miR-380-3p|miR-383-5p|miR-3910|miR-3941|miR-3976|miR-4291|miR-4310|miR-4317|miR-4330|miR-4477a|miR-4491|miR-4495|miR-450b-5p|miR-452-5p|miR-4531|miR-4657|miR-4666a-…		-1.15	-0.59	2.39	-0.56	0.83	0.89	0.89	1.22	2.02	0.73	4.5	0.46	5.33	3.66	2.25876	5.23786	4.08869	2.84514
IRX5	iroquois homeobox 5	protein coding	ENSG00000176842	10265		GO:0008406|GO:0048701	let-7f-2-3p|miR-1185-1-3p|miR-1185-2-3p|miR-1275|miR-147a|miR-153-5p|miR-15a-3p|miR-183-3p|miR-190a-3p|miR-1914-3p|miR-221-3p|miR-222-3p|miR-3148|miR-3188|miR-3613-3p|miR-3680-3p|miR-3688-3p|miR-374c-5p|miR-3911|miR-3922-5p|miR-3934-5p|miR-4261|miR-4497|miR-4665-5p|miR-4699-3p|miR-4719|miR-4753-5p|miR-4779|miR-486-5p|miR-500a-5p|miR-501-5p|miR-5194|miR-552-3p|miR-625-5p|miR-643|miR-6514-3p|miR-65…	IRX3	-1.56	0.17	2.16	-1.73	1.12	1.21	1.21	1.65	2.02	0.11	2.8	1.38	2.39	2.86	2.25042	4.24078	2.68469	2.08059
ENSG00000245213		asRNA	ENSG00000245213						-1.05	0.19	0.67	-1.24	0.76	0.82	0.82	1.12	2.02	0.2	0.99	1.5	1.2	2.73	2.79066	3.27281	2.21886	2.60286
ERMN	ermin, ERM-like protein	protein coding	ENSG00000136541	57471		GO:0005737|GO:0005938|GO:0007015|GO:0008360|GO:0031344|GO:0033269|GO:0033270|GO:0070062			0.97	-0.1	-0.94	1.06	0.7	0.76	0.76	1.03	2.02	0.1	1.75	1.36	1.52	2.7	2.87479	2.0287	2.99738	2.97088
A_33_P3305250		(NA)							0.77	0.32	-0.06	0.46	0.56	0.6	0.6	0.82	2.02	0.55	0.07	0.59	1.4	2.69	2.74216	2.3709	3.14292	2.42668
ENSG00000249502		asRNA	ENSG00000249502						-0.86	-0.71	-0.1	-0.15	0.62	0.67	0.67	0.91	2.02	1.41	0.12	0.14	1.81	2.67	2.43253	3.04463	2.18356	3.14201
Hs.605936		(NA)							-1.04	0.02	0.64	-1.05	0.75	0.81	0.81	1.1	2.02	0.02	0.96	1.22	1.19	2.66	2.60736	3.23414	2.19835	2.58985
A_22_P00009132		(NA)							-0.97	-0.06	0.69	-0.91	0.7	0.75	0.75	1.03	2.02	0.06	1.16	1.11	1.3	2.58	2.43075	3.18001	2.212	2.48726
A_21_P0006583		(NA)							-0.7	0.06	0.61	-0.76	0.51	0.55	0.55	0.75	2.02	0.08	1.52	1.34	1.39	2.43	2.33589	2.88874	2.18736	2.2771
KCND1	potassium channel, voltage gated Shal related subfamily D, member 1	protein coding	ENSG00000102057	3750		GO:0005886|GO:0007268|GO:0061337	miR-1184|miR-1227-5p|miR-1251-3p|miR-1253|miR-1289|miR-1298-3p|miR-135a-5p|miR-135b-5p|miR-204-3p|miR-2276-5p|miR-2467-3p|miR-2909|miR-3150b-3p|miR-3179|miR-328-5p|miR-370-5p|miR-4267|miR-4286|miR-4293|miR-4314|miR-4324|miR-4419a|miR-4434|miR-4436b-3p|miR-4447|miR-4510|miR-4516|miR-4530|miR-4534|miR-4632-5p|miR-4640-5p|miR-4646-5p|miR-4690-3p|miR-4726-5p|miR-4731-5p|miR-4784|miR-5685|miR-5703|miR…		-0.69	-0.07	0.62	-0.62	0.5	0.54	0.54	0.73	2.02	0.11	1.56	1.03	1.58	2.42	2.21713	2.90718	2.21493	2.28953
A_21_P0001697		(NA)							-0.84	-0.04	0.84	-0.8	0.61	0.66	0.66	0.89	2.02	0.05	1.81	1.12	1.71	2.36	2.11152	2.99034	2.14977	2.15359
A_21_P0006179		(NA)							0.93	0.19	0.13	0.74	0.67	0.73	0.73	0.99	2.02	0.23	0.15	0.87	1.73	2.31	2.13729	2.07364	3.00542	1.94506
SULT1C2P1	sulfotransferase family, cytosolic, 1C, member 2 pseudogene 1	pseudogene	ENSG00000237223	151234					0.76	0.25	-0.22	0.51	0.55	0.59	0.59	0.8	2.02	0.42	0.36	0.7	1.27	2.24	2.33606	1.86369	2.61983	2.08605
ZNF526	zinc finger protein 526	protein coding	ENSG00000167625	116115			miR-1225-5p|miR-1254|miR-1284|miR-153-5p|miR-202-3p|miR-221-5p|miR-3116|miR-3907|miR-4288|miR-4469|miR-450b-3p|miR-4514|miR-4692|miR-4720-5p|miR-504-3p|miR-5095|miR-5702|miR-6742-3p|miR-6826-3p|miR-6871-5p|miR-769-3p|miR-8073		-0.74	-0.01	1.45	-0.73	0.54	0.58	0.58	0.79	2.01	0.01	4.17	1.17	4.1	12.94	12.3577	13.8222	13.0778	12.3683
ANXA2R	annexin A2 receptor	protein coding	ENSG00000177721	389289			miR-139-3p|miR-3123|miR-3148|miR-3942-5p|miR-4311|miR-4668-5p|miR-4703-5p|miR-4738-3p|miR-494-3p|miR-520g-3p|miR-520h|miR-548e-5p|miR-5584-5p|miR-634|miR-6802-5p|miR-6830-5p|miR-6880-5p|miR-6892-5p		1.34	0.06	-2.79	1.29	0.97	1.05	1.05	1.43	2.01	0.04	4.48	1.13	4.51	6.11	7.27734	4.43138	5.77389	7.22213
ENSG00000278186		pseudogene	ENSG00000278186						-1.11	-0.22	1.05	-0.89	0.81	0.87	0.87	1.19	2.01	0.22	1.69	0.88	1.79	5.96	5.5376	6.80962	5.69898	5.75642
PRPS1L1	phosphoribosyl pyrophosphate synthetase 1-like 1	protein coding	ENSG00000229937	221823	00030|00230|01100|01200|01230	GO:0004749|GO:0005524|GO:0042803			0.96	0.45	-1.52	0.51	0.69	0.75	0.75	1.02	2.01	0.66	3.28	0.51	3.91	5.95	6.83902	4.8667	5.82642	6.38759
VAMP4	vesicle-associated membrane protein 4	protein coding	ENSG00000117533	8674	04130	GO:0000139|GO:0000226|GO:0005515|GO:0005764|GO:0005768|GO:0005794|GO:0009986|GO:0035493|GO:0090161	let-7f-2-3p|miR-1-3p|miR-1185-1-3p|miR-1185-2-3p|miR-1208|miR-1249-5p|miR-1250-3p|miR-1251-5p|miR-1252-3p|miR-1279|miR-141-3p|miR-1468-3p|miR-149-3p|miR-153-5p|miR-1825|miR-190a-3p|miR-196a-3p|miR-200a-3p|miR-203b-3p|miR-2052|miR-206|miR-210-3p|miR-2115-3p|miR-2116-5p|miR-224-3p|miR-2276-3p|miR-2682-3p|miR-301a-5p|miR-301b-5p|miR-302e|miR-3133|miR-3148|miR-3152-5p|miR-3160-3p|miR-3163|miR-3169|mi…	KLHDC1|PDCD11|PTBP1|SMARCC1|TRIM27|TRIM28|ZC3H6	-1.07	-0.51	0.28	-0.57	0.78	0.84	0.84	1.15	2.01	0.66	0.31	0.51	1.36	5.05	4.80905	5.60069	4.52579	5.31627
THAP10	THAP domain containing 10	protein coding	ENSG00000129028	56906		GO:0005515	miR-1208|miR-3123|miR-3145-3p|miR-3159|miR-3616-5p|miR-3675-3p|miR-4803|miR-541-5p|miR-548b-3p|miR-569|miR-573|miR-610|miR-6501-3p|miR-6757-5p|miR-6759-5p|miR-6832-5p		1.1	0.12	-0.88	0.98	0.8	0.86	0.86	1.17	2.01	0.12	1.34	1.01	1.43	4.98	5.24951	4.24817	5.34765	5.12536
A_32_P48615		(NA)							-1.38	-0.28	2.51	-1.1	1	1.08	1.08	1.48	2.01	0.23	3.83	0.87	4.03	4.65	3.47326	6.26376	4.87929	3.75823
GOLGA8R	golgin A8 family, member R	protein coding	ENSG00000186399	101059918			miR-1226-3p|miR-1273g-5p|miR-1285-5p|miR-1299|miR-181a-5p|miR-181b-5p|miR-181c-5p|miR-181d-5p|miR-205-3p|miR-25-3p|miR-3143|miR-32-5p|miR-323a-3p|miR-363-3p|miR-3662|miR-367-3p|miR-4262|miR-4263|miR-4276|miR-4317|miR-4446-3p|miR-4515|miR-4531|miR-4672|miR-4677-3p|miR-4719|miR-4753-3p|miR-4760-3p|miR-543|miR-5701|miR-589-3p|miR-601|miR-6837-3p|miR-875-3p|miR-9-5p|miR-92a-3p|miR-92b-3p		-1.48	-0.85	0.33	-0.63	1.07	1.16	1.16	1.58	2.01	0.85	0.26	0.39	1.46	3.87	3.46542	4.64645	3.16619	4.31467
Hs.730773		(NA)							2.12	-0.06	0.54	2.18	1.54	1.66	1.66	2.26	2.01	0.03	0.3	1.24	2.23	3.53	2.63155	3.22958	5.35266	2.69002
TNFRSF8	tumor necrosis factor receptor superfamily, member 8	protein coding	ENSG00000120949	943	04060	GO:0004888|GO:0007165|GO:0008285|GO:0042535|GO:0043065|GO:0045556|GO:0070062	miR-1207-5p|miR-1246|miR-1285-3p|miR-1290|miR-18a-3p|miR-1908-5p|miR-3173-5p|miR-3187-5p|miR-326|miR-330-5p|miR-3918|miR-4292|miR-4297|miR-4441|miR-4701-3p|miR-4706|miR-4763-3p|miR-5189-5p|miR-541-5p|miR-612|miR-6132|miR-647|miR-653-5p|miR-663a|miR-6762-5p|miR-6787-5p|miR-6791-5p|miR-6799-3p|miR-6836-5p|miR-6845-5p|miR-6860|miR-6895-5p|miR-7113-5p|miR-7160-3p|miR-92a-2-5p|miR-939-3p		1.59	-0.09	-0.04	1.68	1.15	1.24	1.24	1.69	2.01	0.06	0.03	1.28	1.65	3.16	2.69628	2.74066	4.32695	2.78566
GJB2	gap junction protein, beta 2, 26kDa	protein coding	ENSG00000165474	2706		GO:0005793|GO:0005886|GO:0006810|GO:0016264|GO:0061024	miR-1199-5p|miR-193b-5p|miR-194-5p|miR-224-3p|miR-2355-3p|miR-26a-1-3p|miR-26a-2-3p|miR-3188|miR-323a-3p|miR-330-3p|miR-33a-3p|miR-3929|miR-3975|miR-3976|miR-421|miR-4303|miR-4307|miR-4419b|miR-4425|miR-4443|miR-4478|miR-450a-1-3p|miR-4637|miR-4663|miR-4715-5p|miR-4795-3p|miR-4797-5p|miR-485-5p|miR-516b-5p|miR-5197-5p|miR-522-3p|miR-5582-3p|miR-607|miR-625-5p|miR-6751-3p|miR-6798-5p|miR-6828-3p|m…		1.58	0.32	-0.21	1.26	1.14	1.23	1.23	1.68	2.01	0.23	0.14	0.88	1.33	3.03	2.95183	2.41981	4.00047	2.62943
A_22_P00016481		(NA)							0.95	-0.2	-0.65	1.15	0.69	0.74	0.74	1.01	2.01	0.24	1.09	1.55	1.21	2.73	2.68278	2.23206	3.17936	2.88201
CD8B	CD8b molecule	protein coding	ENSG00000172116	926	04514|04612|04640|04660|05340	GO:0005515|GO:0005886|GO:0005887|GO:0016032|GO:0031901|GO:0050690|GO:0050776	let-7c-3p|miR-1253|miR-1286|miR-18a-3p|miR-4251|miR-4300|miR-4314|miR-4426|miR-4436a|miR-4519|miR-4690-5p|miR-4757-5p|miR-495-3p|miR-5000-3p|miR-5192|miR-5591-5p|miR-5688|miR-6165|miR-6726-5p|miR-6731-5p|miR-6744-3p|miR-6871-5p|miR-7851-3p|miR-8085|miR-920	NPAS4|PIWIL2|SFMBT2	0.73	0.22	-0.27	0.51	0.53	0.57	0.57	0.78	2.01	0.37	0.49	0.74	1.24	2.61	2.72217	2.23026	2.9586	2.50418
A_33_P3257558		(NA)							-0.72	1.01	0.41	-1.73	0.52	0.56	0.56	0.77	2.01	2.83	0.85	3.73	3.39	2.74	3.45325	2.85352	2.1348	2.44301
GOSR1	golgi SNAP receptor complex member 1	protein coding	ENSG00000108587	9527	04130	GO:0000139|GO:0005484|GO:0005794|GO:0006888|GO:0006891|GO:0016020|GO:0018279|GO:0031201|GO:0042147|GO:0043687|GO:0044267|GO:0061024	miR-103a-2-5p|miR-105-5p|miR-106a-5p|miR-106b-5p|miR-1207-5p|miR-126-5p|miR-1284|miR-1288-5p|miR-150-5p|miR-17-5p|miR-186-5p|miR-1911-3p|miR-199a-5p|miR-199b-5p|miR-20a-5p|miR-20b-5p|miR-218-1-3p|miR-222-5p|miR-2467-3p|miR-302e|miR-30a-3p|miR-30d-3p|miR-30e-3p|miR-3120-3p|miR-3126-3p|miR-3152-3p|miR-3162-5p|miR-3176|miR-3180|miR-3180-3p|miR-3180-5p|miR-3191-5p|miR-3196|miR-329-5p|miR-335-3p|miR-3…		-0.63	-0.25	1	-0.38	0.46	0.49	0.49	0.67	2	0.52	3.3	0.6	3.79	10.56	10.0129	11.2621	10.6361	10.2603
SPCS2	signal peptidase complex subunit 2 homolog (S. cerevisiae)	protein coding	ENSG00000118363	9789	03060	GO:0005789|GO:0006412|GO:0006614|GO:0010467|GO:0044267|GO:0050796	miR-103a-2-5p|miR-124-3p|miR-1273h-5p|miR-1275|miR-1277-5p|miR-1279|miR-1295b-5p|miR-142-5p|miR-1912|miR-194-5p|miR-199a-5p|miR-199b-5p|miR-30b-3p|miR-3123|miR-3157-5p|miR-3162-3p|miR-331-5p|miR-34c-3p|miR-3667-3p|miR-3689a-3p|miR-3689b-3p|miR-3689c|miR-3928-5p|miR-3941|miR-4261|miR-4291|miR-4436a|miR-4447|miR-4475|miR-4514|miR-4678|miR-4692|miR-4700-3p|miR-4731-3p|miR-4789-5p|miR-4801|miR-5000-3…		0.61	0.19	-0.1	0.42	0.45	0.48	0.48	0.66	2	0.38	0.17	0.72	1.29	9.89	9.91682	9.62727	10.2417	9.72688
A_23_P255827		(NA)							-0.88	-0.28	-0.95	-0.59	0.64	0.69	0.69	0.94	2	0.4	2.02	0.7	3.97	6.41	6.94437	6.2739	5.39663	7.2285
SCAMP2	secretory carrier membrane protein 2	protein coding	ENSG00000140497	10066		GO:0005515|GO:0005654|GO:0005794|GO:0006892|GO:0015031|GO:0016021|GO:0032588|GO:0043231|GO:0055038|GO:0070062	miR-106a-5p|miR-106b-5p|miR-124-3p|miR-1252-5p|miR-1301-3p|miR-1321|miR-17-5p|miR-20a-5p|miR-20b-5p|miR-2681-5p|miR-3919|miR-3944-5p|miR-4419a|miR-4510|miR-4660|miR-4716-3p|miR-4723-5p|miR-4739|miR-4756-5p|miR-493-5p|miR-5047|miR-506-3p|miR-519a-3p|miR-519b-3p|miR-519c-3p|miR-519d-3p|miR-526b-3p|miR-5698|miR-6077|miR-6127|miR-6129|miR-6130|miR-6133|miR-625-5p|miR-651-3p|miR-6731-5p|miR-6752-3p|mi…		0.83	-0.08	-0.32	0.92	0.61	0.65	0.65	0.89	2	0.1	0.49	1.35	1.22	6.24	6.12437	5.89201	6.72398	6.20901
A_22_P00011689		(NA)							0.85	-0.8	-0.61	1.65	0.62	0.67	0.67	0.91	2	1.65	1.14	2.85	2.08	2.71	2.22097	2.41081	3.26169	3.01871
UVRAG	UV radiation resistance associated	protein coding	ENSG00000198382	7405		GO:0005515|GO:0005737|GO:0005764|GO:0005769|GO:0005770|GO:0005783|GO:0005813|GO:0006281|GO:0006890|GO:0006914|GO:0030496|GO:0032465|GO:0032801|GO:0051297|GO:0051684|GO:0071900|GO:0071985|GO:0097352|GO:0097680	miR-105-5p|miR-1182|miR-1226-5p|miR-124-5p|miR-1286|miR-1323|miR-133a-5p|miR-140-5p|miR-141-5p|miR-186-3p|miR-2276-5p|miR-3166|miR-3189-3p|miR-3616-3p|miR-369-3p|miR-3921|miR-4316|miR-4317|miR-4319|miR-4508|miR-4653-5p|miR-4659a-3p|miR-4659b-3p|miR-4684-5p|miR-4795-3p|miR-4802-3p|miR-490-5p|miR-5010-3p|miR-518c-5p|miR-548ao-5p|miR-548ax|miR-548o-3p|miR-568|miR-582-3p|miR-599|miR-629-5p|miR-664a-3…		-0.95	-0.32	0.33	-0.63	0.69	0.74	0.74	1.01	2	0.43	0.44	0.68	1.26	4.28	4.12183	4.77266	3.82377	4.44434
RASGRP3	RAS guanyl releasing protein 3 (calcium and DAG-regulated)	protein coding	ENSG00000152689	25780	04010|04014|04015|04662|05200	GO:0000165|GO:0000186|GO:0004871|GO:0005085|GO:0005096|GO:0005515|GO:0005886|GO:0007173|GO:0007264|GO:0007265|GO:0007411|GO:0008286|GO:0008543|GO:0038095|GO:0043547|GO:0045087|GO:0048010|GO:0048011	miR-101-3p|miR-1178-5p|miR-1825|miR-1913|miR-2681-3p|miR-3128|miR-3160-5p|miR-3180-5p|miR-324-3p|miR-3646|miR-365a-3p|miR-365b-3p|miR-3664-3p|miR-3689a-5p|miR-3689b-5p|miR-3689e|miR-3689f|miR-3714|miR-3943|miR-4279|miR-4300|miR-4433b-5p|miR-4474-5p|miR-4494|miR-4531|miR-4694-3p|miR-4727-3p|miR-4747-5p|miR-4753-3p|miR-488-3p|miR-496|miR-499a-5p|miR-5011-5p|miR-5096|miR-513a-5p|miR-516a-3p|miR-516b…		1.34	0.02	-0.96	1.31	0.97	1.05	1.05	1.43	2	0.02	1.16	1.16	1.26	2.87	3.04091	2.05537	3.39127	3.01725
TSPAN18	tetraspanin 18	protein coding	ENSG00000157570	90139			let-7a-5p|let-7b-5p|let-7c-5p|let-7d-5p|let-7e-5p|let-7f-5p|let-7g-5p|let-7i-5p|miR-1207-5p|miR-1227-5p|miR-1233-5p|miR-1249-5p|miR-1254|miR-1273h-5p|miR-1275|miR-1285-3p|miR-1321|miR-134-3p|miR-1343-3p|miR-149-3p|miR-1587|miR-185-5p|miR-18a-3p|miR-212-5p|miR-2278|miR-2682-5p|miR-296-5p|miR-3064-5p|miR-30b-3p|miR-3116|miR-3126-5p|miR-3138|miR-3150a-3p|miR-3150b-3p|miR-3152-5p|miR-3166|miR-3175|mi…		1.48	-0.17	-0.02	1.65	1.08	1.16	1.16	1.59	2	0.12	0.01	1.37	1.74	2.73	2.22605	2.37531	3.85568	2.39538
MCC	mutated in colorectal cancers	protein coding	ENSG00000171444	4163		GO:0004872|GO:0005515|GO:0005634|GO:0005654|GO:0005737|GO:0005886|GO:0007165|GO:0010633|GO:0045184|GO:0050680|GO:0090090	miR-105-5p|miR-106a-5p|miR-106b-5p|miR-1243|miR-1249-5p|miR-1250-3p|miR-1253|miR-1266-5p|miR-1273h-5p|miR-1275|miR-1283|miR-1298-3p|miR-1299|miR-130a-3p|miR-130b-3p|miR-146a-3p|miR-150-5p|miR-1537-5p|miR-17-5p|miR-181a-2-3p|miR-181a-5p|miR-181b-5p|miR-181c-5p|miR-181d-5p|miR-186-5p|miR-200a-5p|miR-200b-5p|miR-205-3p|miR-208a-5p|miR-208b-5p|miR-20a-5p|miR-20b-5p|miR-2681-5p|miR-301a-3p|miR-301b-3p…		1.13	-0.02	-0.25	1.14	0.82	0.89	0.89	1.21	2	0.01	0.25	1.2	1.31	2.66	2.47801	2.24498	3.37271	2.49316
A_21_P0006235		(NA)							-0.69	-0.53	0.43	-0.16	0.5	0.54	0.54	0.74	2	1.27	0.96	0.18	2.23	2.64	2.20681	3.17194	2.48236	2.73819
A_21_P0004616		(NA)							-0.91	-0.18	0.83	-0.73	0.66	0.71	0.71	0.97	2	0.21	1.59	0.89	1.71	2.44	2.11008	3.11446	2.20593	2.28523
OCLN	occludin	protein coding	ENSG00000273814	100506658	04514|04530|04670|05130|05160	GO:0005515|GO:0005886|GO:0005911|GO:0005923|GO:0006461|GO:0006915|GO:0006921|GO:0012501|GO:0019904|GO:0030054|GO:0031410|GO:0045216|GO:0070830	let-7c-3p|miR-1178-3p|miR-1179|miR-122-5p|miR-1277-5p|miR-1321|miR-1323|miR-148a-5p|miR-200b-3p|miR-200c-3p|miR-224-5p|miR-302b-5p|miR-302d-5p|miR-3148|miR-3159|miR-3163|miR-3168|miR-3192-5p|miR-340-5p|miR-3609|miR-3613-3p|miR-3622b-5p|miR-3659|miR-3678-3p|miR-3688-3p|miR-371a-5p|miR-371b-5p|miR-373-5p|miR-374c-5p|miR-377-3p|miR-383-3p|miR-3977|miR-410-3p|miR-4251|miR-4255|miR-4261|miR-429|miR-43…		-1.01	-0.07	0.32	-0.95	0.74	0.8	0.8	1.08	2	0.07	0.4	1.08	1.2	2.4	2.45077	2.84233	1.82822	2.5181
Hs.309138		(NA)							-0.75	-0.58	-0.01	-0.17	0.55	0.59	0.59	0.81	2	1.27	0.01	0.18	1.69	2.4	2.17904	2.74896	1.9962	2.75958
Hs.679641		(NA)							0.73	0	-0.17	0.74	0.53	0.58	0.58	0.79	2	0	0.26	1.19	1.3	2.38	2.26891	2.1017	2.83564	2.27094
A_22_P00020869		(NA)							-0.71	0.04	0.62	-0.74	0.51	0.55	0.55	0.76	2	0.05	1.52	1.27	1.4	2.33	2.20921	2.79536	2.08873	2.17288
A_21_P0011296		(NA)							-0.7	0	0.66	-0.71	0.51	0.55	0.55	0.75	2	0.01	1.67	1.2	1.53	2.3	2.13367	2.79429	2.09063	2.12981
A_22_P00007708		(NA)							0.8	0.18	0.2	0.61	0.58	0.63	0.63	0.85	2	0.26	0.3	0.84	1.93	2.3	2.11092	2.13043	2.92767	1.92806
A_21_P0003747		(NA)							0.82	-0.24	-0.12	1.06	0.6	0.64	0.64	0.88	2	0.35	0.16	1.67	1.74	2.25	1.92629	2.04407	2.8619	2.16379
LIPF	lipase, gastric	protein coding	ENSG00000182333	8513	00561|01100|04975	GO:0004806	miR-142-5p|miR-192-3p|miR-3123|miR-4712-3p|miR-548l|miR-5590-3p|miR-6504-3p		-0.68	-0.27	0.43	-0.41	0.5	0.54	0.54	0.73	2	0.53	0.98	0.59	1.56	2.15	1.90196	2.60932	1.92769	2.17589
SURF4	surfeit 4	protein coding	ENSG00000148248	6836		GO:0005515|GO:0005793|GO:0007030|GO:0010638	miR-1199-5p|miR-1252-3p|miR-1294|miR-1321|miR-140-3p|miR-148a-5p|miR-149-3p|miR-185-3p|miR-188-3p|miR-1910-5p|miR-1915-3p|miR-3157-5p|miR-3163|miR-3169|miR-3194-5p|miR-3202|miR-320e|miR-337-3p|miR-3613-3p|miR-3662|miR-371b-5p|miR-373-5p|miR-3910|miR-3918|miR-3919|miR-3925-5p|miR-3934-5p|miR-4252|miR-4270|miR-4271|miR-4303|miR-4328|miR-4419a|miR-4441|miR-4468|miR-4494|miR-4508|miR-4510|miR-4645-5p…	APTX|ARID1B|BAZ2B|BUB3|ELAVL1|LNPEP|NONO|PDCD11|PHC3|POLR2E|PRPF4|PTBP1|SP4|STIP1	0.68	-0.03	0.09	0.71	0.5	0.54	0.54	0.74	1.99	0.04	0.13	1.24	1.93	10.74	10.4911	10.6057	11.2903	10.5178
KDELR1	KDEL (Lys-Asp-Glu-Leu) endoplasmic reticulum protein retention receptor 1	protein coding	ENSG00000105438	10945	05110	GO:0000139|GO:0005046|GO:0005793|GO:0006886|GO:0006888|GO:0016020|GO:0018279|GO:0030133|GO:0033116|GO:0043687|GO:0044267|GO:0061024	let-7c-3p|miR-1200|miR-1227-5p|miR-1283|miR-1343-5p|miR-182-5p|miR-185-3p|miR-2110|miR-3151-5p|miR-3182|miR-331-3p|miR-371b-5p|miR-373-5p|miR-3925-5p|miR-3978|miR-4434|miR-4447|miR-4492|miR-4516|miR-4659a-3p|miR-4659b-3p|miR-4667-5p|miR-4690-3p|miR-4700-5p|miR-4768-3p|miR-486-3p|miR-514a-5p|miR-548ae-3p|miR-548ah-3p|miR-548aj-3p|miR-548am-3p|miR-548an|miR-548aq-3p|miR-548c-3p|miR-548j-3p|miR-548x…	C7orf27|CANX|ERF|HGS|HMG20B|MAZ|MEX3D|MSH6|NONO|PCBP2|PDLIM7|PTBP1|RELA|RXRB|SFRS1|SHC1|SMARCC1|SP4|SREBF2|SYMPK|TP53|TRAF7|TRIM28	0.74	0.09	-0.21	0.65	0.54	0.58	0.58	0.8	1.99	0.13	0.35	0.98	1.19	9.89	9.87804	9.56968	10.3087	9.78413
A_22_P00011973		(NA)							1.05	-0.71	-1.11	1.76	0.77	0.83	0.83	1.13	1.99	1.05	1.92	2.36	1.6	3.38	3.16591	2.76919	3.82027	3.87545
DHDDS	dehydrodolichyl diphosphate synthase	protein coding	ENSG00000117682	79947	00900	GO:0005515|GO:0005789|GO:0006488|GO:0006489|GO:0018279|GO:0043687|GO:0044267	miR-1197|miR-1207-5p|miR-1233-5p|miR-1273h-5p|miR-1321|miR-135b-3p|miR-138-5p|miR-147a|miR-1587|miR-1914-5p|miR-1972|miR-2467-3p|miR-30b-3p|miR-3148|miR-3173-5p|miR-3189-5p|miR-3190-3p|miR-3192-5p|miR-3194-5p|miR-3202|miR-320a|miR-320b|miR-320c|miR-320d|miR-320e|miR-345-3p|miR-3591-5p|miR-3620-5p|miR-3622a-3p|miR-3622b-3p|miR-3656|miR-3689a-3p|miR-3689b-3p|miR-3689c|miR-3934-3p|miR-4265|miR-4270|…		0.74	0.5	-0.3	0.24	0.54	0.58	0.58	0.79	1.99	1.05	0.53	0.28	1.7	5.39	5.71107	4.92012	5.65605	5.21548
Hs.666838		(NA)							0.7	0.15	-0.06	0.55	0.51	0.55	0.55	0.75	1.99	0.24	0.08	0.85	1.36	4.71	4.66526	4.45781	5.15318	4.51538
A_19_P00318938		(NA)							0.79	-0.62	-0.79	1.4	0.57	0.62	0.62	0.84	1.99	1.29	1.8	2.56	1.69	2.38	2.13864	1.96721	2.75258	2.75421
SUCNR1	succinate receptor 1	protein coding	ENSG00000198829	56670	04024	GO:0005886|GO:0070062	miR-1272|miR-141-5p|miR-3074-3p|miR-3166|miR-3607-5p|miR-4256|miR-4277|miR-6501-5p|miR-6507-5p|miR-6817-3p|miR-877-5p		0.91	-0.48	-0.53	1.39	0.66	0.72	0.72	0.98	1.99	0.75	0.86	2.08	1.48	2.68	2.37199	2.32064	3.23104	2.84882
Hs.689932		(NA)							-1.4	0.43	1.98	-1.83	1.02	1.11	1.11	1.51	1.99	0.38	2.82	1.7	2.19	3.72	3.35121	4.89712	3.49739	2.91761
MURC	muscle-related coiled-coil protein	protein coding	ENSG00000170681	347273		GO:0010468	miR-1208|miR-1297|miR-183-5p|miR-1908-3p|miR-1976|miR-2116-5p|miR-218-2-3p|miR-22-3p|miR-30a-3p|miR-30d-3p|miR-30e-3p|miR-3138|miR-361-3p|miR-3613-3p|miR-3679-3p|miR-3685|miR-4455|miR-4456|miR-4473|miR-4502|miR-4659a-5p|miR-4659b-5p|miR-4765|miR-4778-5p|miR-5093|miR-548a-3p|miR-548ar-3p|miR-548as-3p|miR-548av-3p|miR-548az-3p|miR-548e-3p|miR-548f-3p|miR-5680|miR-5692b|miR-5692c|miR-579-3p|miR-627-…		1.46	0.43	1.26	1.03	1.06	1.15	1.15	1.56	1.99	0.35	1.48	0.74	3.39	3.65	2.89796	3.73313	5.19109	2.47051
CYFIP2	cytoplasmic FMR1 interacting protein 2	protein coding	ENSG00000055163	26999	03013|04810	GO:0005515|GO:0005737|GO:0005829|GO:0006915|GO:0007264|GO:0016020|GO:0016337|GO:0038096|GO:0045087|GO:0045202|GO:0045862|GO:0048010|GO:0048471|GO:0070062|GO:0097202	let-7c-3p|miR-1-3p|miR-1178-5p|miR-1207-5p|miR-1227-5p|miR-1229-5p|miR-1233-5p|miR-1236-3p|miR-125a-5p|miR-125b-5p|miR-1266-5p|miR-1273h-5p|miR-140-3p|miR-143-3p|miR-146b-3p|miR-150-3p|miR-153-3p|miR-185-5p|miR-206|miR-2116-5p|miR-302c-5p|miR-3064-5p|miR-30b-3p|miR-30c-1-3p|miR-30c-2-3p|miR-3120-3p|miR-3170|miR-3175|miR-3182|miR-3201|miR-335-3p|miR-3613-3p|miR-3653-5p|miR-3658|miR-3686|miR-3688-3…	FIZ1|ZMYND8	-1.68	0.11	2.09	-1.79	1.23	1.33	1.33	1.81	1.99	0.07	2.39	1.29	2.05	3.35	2.76139	4.7415	3.06079	2.64891
PCDH19	protocadherin 19	protein coding	ENSG00000165194	57526			miR-1-5p|miR-1179|miR-124-3p|miR-1266-3p|miR-1275|miR-1276|miR-1277-5p|miR-1283|miR-130a-5p|miR-145-3p|miR-146a-3p|miR-149-5p|miR-1537-5p|miR-181a-2-3p|miR-181a-5p|miR-181b-2-3p|miR-181b-3p|miR-181b-5p|miR-181c-5p|miR-181d-5p|miR-1825|miR-1909-3p|miR-1910-3p|miR-197-3p|miR-198|miR-19a-5p|miR-19b-1-5p|miR-19b-2-5p|miR-203a-3p|miR-2054|miR-21-3p|miR-2115-3p|miR-2355-5p|miR-2392|miR-23a-3p|miR-23b-3…		1.08	0.09	-0.92	0.99	0.79	0.85	0.85	1.16	1.99	0.09	1.44	1.04	1.46	2.96	3.23454	2.22316	3.30241	3.14032
Hs.534418		(NA)							1.54	-0.05	-0.47	1.59	1.13	1.22	1.22	1.66	1.99	0.03	0.37	1.23	1.23	2.94	2.73698	2.31825	3.86196	2.78819
ENSG00000236021		asRNA	ENSG00000236021						1.03	-0.38	-1.11	1.41	0.76	0.82	0.82	1.11	1.99	0.47	1.97	1.8	1.52	2.85	2.89222	2.16036	3.19525	3.27166
A_33_P3236686		(NA)							-0.85	0.28	1.11	-1.13	0.62	0.67	0.67	0.91	1.99	0.41	2.57	1.74	1.96	2.59	2.42848	3.25954	2.4137	2.14886
OR2T6	olfactory receptor, family 2, subfamily T, member 6	protein coding	ENSG00000278659	254879	04740	GO:0005886			0.86	0.27	-0.27	0.59	0.63	0.68	0.68	0.93	1.99	0.39	0.39	0.7	1.23	2.56	2.67325	2.12673	2.99074	2.39902
OR5H2	olfactory receptor, family 5, subfamily H, member 2	protein coding	ENSG00000197938	79310	04740	GO:0005886			-0.84	-0.83	-0.37	-0.01	0.62	0.67	0.67	0.91	1.99	1.76	0.58	0.01	2.19	2.5	2.315	2.77934	1.93661	3.14529
Hs.635350		(NA)							-0.75	0.25	0.77	-1	0.54	0.59	0.59	0.8	1.99	0.42	1.86	1.75	1.46	2.23	2.20255	2.71882	1.97376	1.95167
ABHD8	abhydrolase domain containing 8	protein coding	ENSG00000127220	79575		GO:0070062	miR-1227-5p|miR-3182|miR-4283|miR-4419a|miR-624-3p|miR-6840-3p|miR-7108-3p|miR-7109-5p|miR-7846-3p		-0.79	0.15	0.73	-0.94	0.58	0.63	0.63	0.85	1.98	0.21	1.61	1.49	1.36	8.68	8.61478	9.19424	8.40304	8.4619
LPAR1	lysophosphatidic acid receptor 1	protein coding	ENSG00000198121	1902	04015|04072|04080|04151|04540|05200	GO:0004930|GO:0005515|GO:0005768|GO:0005829|GO:0005886|GO:0005887|GO:0007186|GO:0007193|GO:0007202|GO:0007204|GO:0008360|GO:0009986|GO:0010977|GO:0035025|GO:0035727|GO:0043410|GO:0051482|GO:0051496|GO:0060326|GO:0070915	miR-106a-3p|miR-1273g-3p|miR-1277-5p|miR-1287-5p|miR-130a-5p|miR-16-2-3p|miR-188-5p|miR-195-3p|miR-200b-3p|miR-200c-3p|miR-202-5p|miR-204-5p|miR-205-5p|miR-20a-3p|miR-211-5p|miR-217|miR-221-5p|miR-23a-3p|miR-23b-3p|miR-23c|miR-3160-5p|miR-323a-3p|miR-338-5p|miR-3591-5p|miR-3646|miR-3682-5p|miR-3688-5p|miR-374a-5p|miR-374b-5p|miR-384|miR-3910|miR-3977|miR-4274|miR-4279|miR-429|miR-4328|miR-4452|mi…		-1.23	-0.32	-1.79	-0.91	0.9	0.97	0.97	1.33	1.98	0.31	2.91	0.78	5	8.31	9.35943	7.89282	6.66217	9.68375
EMILIN2	elastin microfibril interfacer 2	protein coding	ENSG00000132205	84034		GO:0005515|GO:0005576|GO:0031012	miR-1207-3p|miR-1227-5p|miR-145-5p|miR-2115-5p|miR-3173-5p|miR-339-5p|miR-4280|miR-4325|miR-4485-5p|miR-4486|miR-4685-5p|miR-4690-3p|miR-493-5p|miR-507|miR-5195-3p|miR-548at-5p|miR-557|miR-5685|miR-6499-3p|miR-6799-3p|miR-6807-5p|miR-6833-5p|miR-6856-3p|miR-7113-3p|miR-885-5p|miR-9-3p		1.32	-0.18	-2.74	1.51	0.97	1.05	1.05	1.43	1.98	0.14	4.4	1.4	4.14	7.9	8.87305	6.30971	7.6346	9.05463
TXNDC12	thioredoxin domain containing 12 (endoplasmic reticulum)	protein coding	ENSG00000117862	51060	00480	GO:0005515|GO:0005788|GO:0015037|GO:1902236	miR-1236-3p|miR-1273h-5p|miR-150-3p|miR-181a-5p|miR-181b-5p|miR-181c-5p|miR-181d-5p|miR-197-3p|miR-199a-5p|miR-199b-5p|miR-2115-5p|miR-30b-3p|miR-3182|miR-362-5p|miR-3671|miR-3689a-3p|miR-3689b-3p|miR-3689c|miR-3916|miR-4262|miR-4428|miR-4434|miR-4448|miR-4502|miR-4516|miR-4650-3p|miR-4712-5p|miR-4753-3p|miR-500b-5p|miR-515-5p|miR-519e-5p|miR-5579-5p|miR-5584-5p|miR-561-3p|miR-5703|miR-582-5p|miR…	ARNTL2|BUB3|DDX51|DHX37|DRAP1|DUS3L|E2F3|EWSR1|GTF3C2|HNRPM|ILF3|ING1|KATNB1|PDCD11|PWP1|RAE1|RANBP1|RBM12|RBM19|RC3H2|RFC2|SFPQ|SFRS15|SYNCRIP|THOC4|TREX1|WDR18|WDR68	0.64	0.19	-0.38	0.45	0.47	0.51	0.51	0.69	1.98	0.35	0.89	0.73	1.35	7.89	8.05784	7.48775	8.12674	7.87048
TRMU	tRNA 5-methylaminomethyl-2-thiouridylate methyltransferase	protein coding	ENSG00000100416	55687	04122	GO:0005654|GO:0005739|GO:0008033|GO:0010467|GO:0070900	miR-2355-3p|miR-6858-3p		1.05	-0.15	-1.22	1.2	0.77	0.83	0.83	1.13	1.98	0.15	2.17	1.41	1.78	5.39	5.65038	4.58445	5.63439	5.80071
LARP6	La ribonucleoprotein domain family, member 6	protein coding					miR-126-3p|miR-129-1-3p|miR-129-2-3p|miR-215-3p|miR-3618|miR-3677-5p|miR-383-3p|miR-4264|miR-4539|miR-4795-3p|miR-577|miR-609|miR-6504-3p|miR-6715b-3p|miR-6854-5p|miR-7515		-0.98	0.02	-0.05	-1.01	0.72	0.78	0.78	1.06	1.98	0.02	0.05	1.21	1.73	4.4	4.70312	4.6314	3.64894	4.68038
GHRLOS	ghrelin opposite strand/antisense RNA	asRNA							-1.39	-0.03	2.08	-1.35	1.01	1.1	1.1	1.49	1.98	0.02	3.03	1.14	2.83	4.26	3.49697	5.61402	4.22709	3.53179
SNTB1	syntrophin, beta 1 (dystrophin-associated protein A1, 59kDa, basic component 1)	protein coding	ENSG00000172164	6641		GO:0005515|GO:0005925|GO:0006936|GO:0016010|GO:0043234	miR-1-5p|miR-1179|miR-1208|miR-1250-3p|miR-127-5p|miR-1275|miR-1277-5p|miR-1279|miR-153-5p|miR-155-3p|miR-16-1-3p|miR-2052|miR-26b-3p|miR-3074-5p|miR-3123|miR-3145-5p|miR-3152-3p|miR-3183|miR-320a|miR-320b|miR-320c|miR-320d|miR-323b-5p|miR-33a-3p|miR-3606-5p|miR-3612|miR-3685|miR-3919|miR-410-5p|miR-4308|miR-4310|miR-4423-3p|miR-4429|miR-4452|miR-4456|miR-4482-3p|miR-450a-2-3p|miR-4639-3p|miR-466…		-1.5	-0.76	-0.1	-0.74	1.1	1.19	1.19	1.62	1.98	0.71	0.07	0.46	1.51	4.19	4.08733	4.74443	3.24071	4.84678
A_22_P00021963		(NA)							0.81	-0.42	0.74	1.23	0.6	0.64	0.64	0.88	1.98	0.72	1.57	2.05	4.8	5.73	4.81655	5.97318	6.78769	5.23405
A_33_P3283300		(NA)							-0.84	-0.14	-0.11	-0.71	0.62	0.67	0.67	0.91	1.98	0.17	0.13	0.92	1.69	3.39	3.56819	3.59961	2.75507	3.70542
TPTEP1	transmembrane phosphatase with tensin homology pseudogene 1	lincRNA	ENSG00000100181	387590					0.79	-0.31	-0.34	1.09	0.58	0.62	0.62	0.85	1.98	0.5	0.58	1.83	1.43	3.22	2.96649	2.93159	3.71926	3.27269
A_22_P00024660		(NA)							-1.1	0.33	1.89	-1.43	0.8	0.87	0.87	1.18	1.98	0.36	3.58	1.68	2.98	2.85	2.376	3.9393	2.84301	2.04474
A_21_P0009948		(NA)							-0.73	0.55	0.54	-1.28	0.53	0.58	0.58	0.79	1.98	1.21	1.19	2.49	1.7	2.39	2.70051	2.69189	1.96094	2.1515
ENSG00000237699		lincRNA	ENSG00000237699						0.73	0.57	-0.35	0.16	0.54	0.58	0.58	0.79	1.98	1.29	0.65	0.17	1.98	2.66	3.06857	2.1469	2.87801	2.49376
LINC00458	lincRNA 458	lincRNA	ENSG00000234787	100507428					0.7	-0.11	-0.18	0.81	0.52	0.56	0.56	0.76	1.98	0.16	0.3	1.43	1.37	2.61	2.43625	2.36278	3.06499	2.54514
A_21_P0005883		(NA)							-0.88	-0.54	-0.02	-0.34	0.65	0.7	0.7	0.95	1.98	0.92	0.02	0.33	1.52	2.39	2.22959	2.75896	1.87531	2.77426
Hs.739143		(NA)							-0.93	-0.09	0.85	-0.84	0.68	0.74	0.74	1	1.98	0.09	1.58	1.03	1.57	2.33	2.05607	2.99425	2.06345	2.14394
IFNL3	interferon, lambda 3	protein coding	ENSG00000197110	282617	04060|04630	GO:0045071|GO:0051607|GO:1903955			0.74	0.21	-0.03	0.54	0.54	0.59	0.59	0.8	1.98	0.33	0.04	0.75	1.38	2.24	2.20932	1.97202	2.71421	2.00228
A_21_P0004965		(NA)							0.72	-0.32	-0.32	1.04	0.53	0.57	0.57	0.78	1.98	0.59	0.6	1.92	1.49	2.17	1.91391	1.90923	2.62914	2.22919
CHPF2	chondroitin polymerizing factor 2	protein coding	ENSG00000033100	54480	00532|01100	GO:0000139|GO:0005975|GO:0016020|GO:0030203|GO:0030204|GO:0030206|GO:0044281	miR-1250-3p|miR-1827|miR-298|miR-3120-3p|miR-3166|miR-335-3p|miR-6886-3p		-0.66	-0.32	1.27	-0.34	0.49	0.53	0.53	0.72	1.97	0.66	4.04	0.49	4.76	7.46	6.72901	8.31827	7.65748	7.04623
GPT2	glutamic pyruvate transaminase (alanine aminotransferase) 2	protein coding	ENSG00000166123	84706	00220|00250|01100|01200|01210|01230	GO:0004021|GO:0005759|GO:0006103|GO:0008652|GO:0034641|GO:0042851|GO:0044281	miR-124-3p|miR-1254|miR-1281|miR-185-3p|miR-3116|miR-3117-3p|miR-4477b|miR-4530|miR-4675|miR-4741|miR-506-3p|miR-548g-3p|miR-5582-5p|miR-561-3p|miR-6085|miR-661|miR-6771-3p|miR-6776-5p|miR-6786-5p|miR-6789-5p|miR-6813-5p|miR-6825-5p|miR-7109-3p|miR-7850-5p|miR-7856-5p|miR-892a		-0.96	-0.86	0.44	-0.1	0.71	0.77	0.77	1.05	1.97	1.52	0.62	0.08	2.16	5.71	5.09799	6.39918	5.43465	5.95779
EIF3J-AS1	EIF3J antisense RNA 1 (head to head)	lincRNA	ENSG00000179523						-0.75	0.24	-0.63	-0.99	0.55	0.6	0.6	0.81	1.97	0.4	1.41	1.71	4.25	5.39	6.10394	5.22813	4.47605	5.8611
TPTE	transmembrane phosphatase with tensin homology	protein coding	ENSG00000274391	7179		GO:0006470|GO:0007165|GO:0035335	let-7a-3p|let-7b-3p|let-7f-1-3p|miR-1207-5p|miR-1275|miR-138-2-3p|miR-22-5p|miR-3074-5p|miR-3179|miR-380-3p|miR-4271|miR-4426|miR-4647|miR-4724-3p|miR-4725-3p|miR-4763-3p|miR-4803|miR-5011-5p|miR-561-5p|miR-5681a|miR-651-5p|miR-6510-5p|miR-656-5p|miR-6780b-5p|miR-6830-5p|miR-98-3p		-0.7	-0.18	0.09	-0.52	0.52	0.56	0.56	0.76	1.97	0.3	0.14	0.78	1.28	5.14	5.14747	5.42011	4.71782	5.32793
COX10	COX10 heme A:farnesyltransferase cytochrome c oxidase assembly factor	protein coding	ENSG00000006695	1352	00190|00860|01100	GO:0004311|GO:0005739|GO:0005743|GO:0006123|GO:0006778|GO:0006783|GO:0006784|GO:0008535|GO:0044281|GO:0045333|GO:0070069|GO:1902600	let-7c-3p|miR-1205|miR-122-5p|miR-1285-3p|miR-130a-3p|miR-130b-3p|miR-1343-5p|miR-147a|miR-149-5p|miR-181b-2-3p|miR-181b-3p|miR-185-5p|miR-204-5p|miR-211-5p|miR-2115-5p|miR-219a-2-3p|miR-301a-3p|miR-301b-3p|miR-3123|miR-3125|miR-3150a-3p|miR-3150b-3p|miR-3187-5p|miR-3192-5p|miR-3666|miR-3692-5p|miR-3916|miR-3925-5p|miR-3942-3p|miR-4257|miR-4292|miR-4295|miR-4306|miR-4311|miR-4420|miR-4443|miR-444…	E2F4|EZH1|LIMD1|NLRP1|TCF20|THRB	1.12	-0.33	-0.9	1.45	0.83	0.89	0.89	1.22	1.97	0.35	1.32	1.66	1.24	4.4	4.339	3.77029	4.8923	4.66997
ENSG00000250310		asRNA	ENSG00000250310						0.99	-0.22	-0.6	1.2	0.73	0.89	0.89	1.15	1.97	0.21	0.77	1.39	1.13	4.03	3.94209	3.55581	4.54279	4.15904
A_22_P00019325		(NA)							1.09	0.24	0.04	0.85	0.8	0.87	0.87	1.18	1.97	0.25	0.04	0.83	1.5	3.7	3.56274	3.3646	4.45337	3.32128
SPIRE2	spire-type actin nucleation factor 2	protein coding	ENSG00000204991	84501	04320	GO:0005938|GO:0016192|GO:0030036|GO:0030659|GO:0036089|GO:0040038|GO:0046907|GO:0051295|GO:0070649	miR-1227-5p|miR-1286|miR-190a-3p|miR-1915-3p|miR-3065-3p|miR-3924|miR-4270|miR-4441|miR-4640-5p|miR-4667-5p|miR-4726-5p|miR-4763-5p|miR-493-5p|miR-5011-5p|miR-504-3p|miR-5704|miR-656-3p|miR-6754-5p|miR-6764-5p|miR-6778-3p|miR-6852-5p	IGHMBP2|MYST4	-1.44	0.2	1.43	-1.64	1.06	1.15	1.15	1.57	1.97	0.14	1.74	1.39	1.46	3.5	3.27333	4.5005	3.05599	3.07463
TMEM151A	transmembrane protein 151A	protein coding	ENSG00000179292	256472			miR-125a-5p|miR-125b-5p|miR-1275|miR-1291|miR-149-3p|miR-1827|miR-218-5p|miR-2861|miR-296-5p|miR-30c-1-3p|miR-30c-2-3p|miR-3144-5p|miR-3616-3p|miR-3657|miR-3922-5p|miR-4258|miR-4283|miR-4292|miR-4319|miR-4443|miR-4447|miR-4472|miR-4497|miR-4516|miR-4665-5p|miR-4691-5p|miR-4709-3p|miR-4723-5p|miR-4728-5p|miR-5193|miR-5698|miR-6079|miR-6131|miR-637|miR-6510-5p|miR-6749-3p|miR-6752-3p|miR-6775-3p|mi…		-0.93	-0.44	-0.48	-0.48	0.68	0.73	0.73	1	1.97	0.66	0.74	0.49	2.3	3.35	3.53411	3.49316	2.56688	3.97615
A_22_P00017431		(NA)							-1.03	-0.24	0.14	-0.78	0.76	0.82	0.82	1.11	1.97	0.27	0.14	0.81	1.28	3.25	3.2705	3.65457	2.62841	3.51478
LOC101927359	uncharacterized LOC101927359	lincRNA	ENSG00000250241	101927359					-1.76	0.15	2.5	-1.92	1.3	1.4	1.4	1.91	1.97	0.09	2.8	1.31	2.42	3.02	2.26819	4.61083	2.84692	2.11489
A_19_P00320047		(NA)							-0.99	-0.24	0.06	-0.75	0.72	0.78	0.78	1.07	1.97	0.28	0.06	0.8	1.36	2.82	2.87975	3.1792	2.19187	3.12179
ZNF296	zinc finger protein 296	protein coding	ENSG00000170684	162979		GO:0007283	miR-211-3p|miR-432-5p|miR-4516|miR-4531|miR-5584-5p|miR-6753-5p		1.24	0.81	-0.11	0.42	0.91	0.98	0.98	1.34	1.97	1.01	0.09	0.29	1.51	2.81	3.13058	2.20771	3.44382	2.3173
CDC42-IT1	CDC42 intronic transcript 1	lncRNA	ENSG00000230068						-0.87	0.57	2.07	-1.44	0.64	0.69	0.69	0.94	1.97	0.99	5.07	2.29	4.33	3.09	2.63559	4.14213	3.27018	2.06764
LYZL2	lysozyme-like 2	protein coding	ENSG00000151033	119180			miR-1273h-5p|miR-30b-3p|miR-3689a-3p|miR-3689b-3p|miR-3689c|miR-4694-3p|miR-5695|miR-642a-5p|miR-6770-5p|miR-6779-5p|miR-6780a-5p|miR-6892-3p|miR-7106-5p		-0.82	-0.34	0.26	-0.47	0.6	0.65	0.65	0.88	1.97	0.56	0.4	0.56	1.3	2.63	2.45012	3.05761	2.24197	2.79388
A_22_P00011244		(NA)							0.83	0.14	0.23	0.69	0.61	0.66	0.66	0.9	1.97	0.18	0.33	0.91	1.99	2.61	2.36998	2.45786	3.29241	2.22706
A_21_P0005399		(NA)							1.15	0.15	0.15	1	0.84	0.91	0.91	1.24	1.97	0.14	0.13	0.97	1.72	2.58	2.31019	2.30578	3.45482	2.15892
Hs.641753		(NA)							-0.76	-0.77	-0.15	0.01	0.56	0.6	0.6	0.82	1.97	1.82	0.22	0.01	2.02	2.58	2.29291	2.91523	2.15447	3.06678
Hs.334196		(NA)							-0.91	-0.02	0.38	-0.89	0.67	0.73	0.73	0.99	1.97	0.02	0.54	1.13	1.13	2.43	2.46161	2.85977	1.94541	2.48304
IQCJ	IQ motif containing J	protein coding	ENSG00000214216	654502			miR-140-3p|miR-218-5p|miR-2681-5p|miR-3156-3p|miR-340-5p|miR-3976|miR-4276|miR-4310|miR-4456|miR-4711-3p|miR-4733-5p|miR-5682|miR-607|miR-647|miR-6742-3p|miR-6760-3p|miR-6788-3p|miR-6886-3p		-0.73	-0.24	0.37	-0.49	0.54	0.58	0.58	0.79	1.97	0.41	0.71	0.68	1.3	2.4	2.2175	2.8317	2.10019	2.45896
MLIP-IT1	MLIP intronic transcript 1 (non-protein coding)	lncRNA	ENSG00000236996	100874282					-0.74	-0.41	0.13	-0.33	0.54	0.59	0.59	0.8	1.97	0.8	0.2	0.4	1.41	2.37	2.19384	2.73734	1.99981	2.60411
A_22_P00000331		(NA)							-0.83	-0.15	0.47	-0.68	0.61	0.66	0.66	0.9	1.97	0.2	0.82	0.89	1.21	2.3	2.15775	2.7795	1.94677	2.30959
PSAT1	phosphoserine aminotransferase 1	protein coding	ENSG00000135069	29968	00260|00750|01100|01200|01230	GO:0004648|GO:0005737|GO:0005829|GO:0006564|GO:0008652|GO:0034641|GO:0044281|GO:0070062	miR-142-5p|miR-15a-5p|miR-15b-5p|miR-16-5p|miR-195-5p|miR-200b-3p|miR-200c-3p|miR-2115-5p|miR-3117-3p|miR-323a-3p|miR-340-5p|miR-3925-5p|miR-3978|miR-424-5p|miR-4272|miR-4276|miR-429|miR-4307|miR-4463|miR-4677-5p|miR-4742-3p|miR-4790-3p|miR-4797-5p|miR-497-5p|miR-508-5p|miR-5094|miR-5197-5p|miR-520d-5p|miR-524-5p|miR-545-3p|miR-548an|miR-548e-5p|miR-548l|miR-5590-3p|miR-570-3p|miR-579-3p|miR-664b…	ANLN|BUB3|CCNA2|CCNB1|CCNB2|DDX55|ECT2|FBXO5|KLHDC1|KPNA2|MCM4|MSH6|NONO|PDCD11|PPP2R1B|RAD54B|RAE1|SFRS2|TTC26	-1.53	-0.59	-0.4	-0.94	1.13	1.22	1.22	1.66	1.96	0.49	0.31	0.61	1.79	9.66	9.84856	10.0351	8.50458	10.4373
GALNT12	polypeptide N-acetylgalactosaminyltransferase 12	protein coding	ENSG00000119514	79695	00512|01100	GO:0000139|GO:0006493|GO:0016266|GO:0043687|GO:0044267	miR-1179|miR-124-3p|miR-1266-5p|miR-1279|miR-129-5p|miR-153-5p|miR-202-3p|miR-21-5p|miR-2682-3p|miR-329-5p|miR-3622a-5p|miR-371b-5p|miR-373-5p|miR-382-3p|miR-4273|miR-4518|miR-4678|miR-506-3p|miR-5197-5p|miR-548an|miR-551b-5p|miR-590-5p|miR-616-5p|miR-618|miR-656-3p|miR-6781-3p|miR-7113-3p|miR-7156-5p|miR-8063		1.68	0.09	1.84	1.59	1.24	1.34	1.34	1.83	1.96	0.05	1.99	1.08	4.28	5.6	4.24245	5.98981	7.67308	4.15106
Hs.661702		(NA)							-1.31	-0.34	2.52	-0.97	0.97	1.04	1.04	1.42	1.96	0.3	4.02	0.78	4.33	5.39	4.15027	7.0037	5.69291	4.48654
ENSG00000261114		lncRNA	ENSG00000261114						-1.14	-0.63	1.52	-0.52	0.84	0.91	0.91	1.24	1.96	0.78	2.57	0.41	3.3	5.14	4.17224	6.32045	5.17547	4.79995
DBR1	debranching RNA lariats 1	protein coding	ENSG00000138231	51163		GO:0000375|GO:0005634|GO:0008419|GO:0044822|GO:0090502	miR-1224-3p|miR-126-5p|miR-1277-5p|miR-1297|miR-142-5p|miR-26a-5p|miR-26b-5p|miR-3130-5p|miR-320a|miR-320b|miR-320c|miR-320d|miR-33a-3p|miR-340-5p|miR-3612|miR-3613-3p|miR-3646|miR-371b-5p|miR-373-5p|miR-374a-5p|miR-374b-5p|miR-4422|miR-4429|miR-4443|miR-4455|miR-4465|miR-4482-5p|miR-4694-3p|miR-4744|miR-4772-5p|miR-548c-3p|miR-5590-3p|miR-5689|miR-5692b|miR-5692c|miR-616-5p|miR-650|miR-7851-3p|m…	ATAD2|C13orf7|EIF1AX|FUBP3|FUSIP1|TCTN2|TFAM|ZNF451	1.08	0.82	0.05	0.26	0.8	0.86	0.86	1.17	1.96	1.22	0.04	0.19	1.64	4.91	5.2015	4.43019	5.50822	4.37972
LRRC42	leucine rich repeat containing 42	protein coding	ENSG00000116212	115353			miR-3120-3p|miR-33a-3p|miR-3924|miR-3974|miR-4477b|miR-4640-5p|miR-4686|miR-4726-5p|miR-545-3p|miR-548n|miR-548p|miR-5590-5p|miR-6826-3p|miR-6887-3p|miR-7856-5p|miR-944	BUB3|EIF4A3|FBXO22|RANBP1|RFC5|RNASEH2A|RUVBL2|TOMM34|TREX1|WDR18|XRCC6	0.91	0.64	-0.28	0.27	0.68	0.73	0.73	0.99	1.96	1.09	0.37	0.24	1.62	4.66	5.03394	4.11075	5.02492	4.39295
A_33_P3280502		(NA)							-1.53	-0.61	2.27	-0.92	1.13	1.22	1.22	1.66	1.96	0.51	2.96	0.59	3.41	4.65	3.402	6.28341	4.7531	4.0086
GORAB	golgin, RAB6-interacting	protein coding	ENSG00000120370	92344	04115	GO:0005515|GO:0005634|GO:0005654|GO:0005730|GO:0005737|GO:0005794	miR-125b-2-3p|miR-1290|miR-1297|miR-1303|miR-190a-3p|miR-199a-3p|miR-199b-3p|miR-2117|miR-219b-5p|miR-224-5p|miR-30a-3p|miR-30d-3p|miR-30e-3p|miR-3119|miR-3127-5p|miR-3129-5p|miR-3152-3p|miR-3182|miR-34a-3p|miR-382-5p|miR-3908|miR-3920|miR-3923|miR-3926|miR-4273|miR-4310|miR-4452|miR-4516|miR-466|miR-4699-3p|miR-4761-5p|miR-4762-3p|miR-495-3p|miR-499b-5p|miR-5004-3p|miR-5011-5p|miR-511-5p|miR-513…		-0.98	0.3	0.2	-1.29	0.73	0.79	0.79	1.07	1.96	0.37	0.23	1.67	1.61	4.41	4.77988	4.68358	3.69946	4.47882
LGR6	leucine-rich repeat containing G protein-coupled receptor 6	protein coding	ENSG00000133067	59352		GO:0004888|GO:0005515|GO:0005886|GO:0005887|GO:0030177|GO:0030335|GO:0031982|GO:0032588|GO:0090263	miR-1236-3p|miR-127-5p|miR-185-5p|miR-216b-5p|miR-3175|miR-3675-3p|miR-4271|miR-4306|miR-4493|miR-4644|miR-4716-3p|miR-4723-5p|miR-4725-3p|miR-4753-5p|miR-4802-3p|miR-5008-5p|miR-513a-5p|miR-5681a|miR-5698|miR-6077|miR-6731-5p|miR-6758-5p|miR-6780b-5p|miR-6792-5p|miR-6856-5p|miR-6870-5p|miR-7111-5p|miR-7113-5p|miR-8077|miR-8085|miR-9500		1.29	0.27	-1.16	1.01	0.95	1.03	1.03	1.4	1.96	0.23	1.54	0.84	1.67	4.2	4.67306	3.23835	4.52367	4.40064
A_22_P00003797		(NA)							-1.21	-0.17	2.53	-1.05	0.9	0.97	0.97	1.32	1.96	0.14	4.4	0.95	4.57	4.03	2.88483	5.58476	4.3705	3.05319
A_21_P0014252		(NA)							-1.13	-0.12	-0.19	-1.02	0.84	0.9	0.9	1.23	1.96	0.1	0.18	1	1.82	3.8	4.12003	4.04301	2.91013	4.23577
ACSM5	acyl-CoA synthetase medium-chain family member 5	protein coding	ENSG00000183549	54988	00650|01100		miR-1249-5p|miR-3074-5p|miR-338-3p|miR-3918|miR-4294|miR-4303|miR-4310|miR-4419a|miR-4509|miR-610|miR-6797-5p|miR-6868-5p|miR-921		1.03	0.04	-1.14	0.99	0.76	0.82	0.82	1.12	1.96	0.04	2.04	1.1	1.85	3.13	3.49486	2.31436	3.34118	3.45651
ENSG00000280360		protein coding	ENSG00000280360						-1	0.3	0.92	-1.3	0.74	0.8	0.8	1.09	1.96	0.35	1.58	1.65	1.32	2.72	2.71816	3.3434	2.33943	2.41944
LOC101927666	uncharacterized LOC101927666	lincRNA	ENSG00000266290	101927666					-0.69	0.08	0.17	-0.77	0.51	0.55	0.55	0.75	1.96	0.11	0.28	1.34	1.33	2.64	2.78883	2.88189	2.1904	2.71272
GPR15	G protein-coupled receptor 15	protein coding	ENSG00000154165	2838		GO:0005886|GO:0005887			0.76	-0.03	-0.24	0.78	0.56	0.6	0.6	0.82	1.96	0.03	0.39	1.22	1.2	2.58	2.49247	2.27305	3.03018	2.51777
A_21_P0006250		(NA)							0.69	0.23	0.01	0.46	0.51	0.55	0.55	0.74	1.96	0.41	0.02	0.67	1.43	2.42	2.39788	2.18352	2.86887	2.16864
A_21_P0013073		(NA)							0.79	0.48	-0.14	0.31	0.58	0.63	0.63	0.86	1.96	0.9	0.2	0.34	1.44	2.39	2.61043	1.98862	2.77527	2.13324
A_21_P0004217		(NA)							0.74	0.04	-0.24	0.7	0.54	0.59	0.59	0.8	1.96	0.05	0.39	1.08	1.16	2.38	2.34026	2.06577	2.80149	2.30182
A_21_P0004282		(NA)							-0.8	0.09	0.46	-0.89	0.59	0.64	0.64	0.87	1.96	0.11	0.84	1.34	1.12	2.31	2.33913	2.71162	1.91227	2.25094
RNF10	ring finger protein 10	protein coding	ENSG00000022840	9921		GO:0004842|GO:0005515|GO:0005634|GO:0005737|GO:0010626|GO:0031643|GO:0044212|GO:0045893|GO:0045944|GO:0051865	miR-1266-5p|miR-1275|miR-1301-5p|miR-146a-5p|miR-146b-5p|miR-15a-5p|miR-15b-5p|miR-16-5p|miR-195-5p|miR-196a-5p|miR-196b-5p|miR-218-1-3p|miR-302b-5p|miR-302d-5p|miR-320e|miR-3665|miR-3679-3p|miR-372-5p|miR-3940-5p|miR-424-5p|miR-4282|miR-4419a|miR-4434|miR-4507|miR-4510|miR-4516|miR-4518|miR-4531|miR-4534|miR-4665-5p|miR-4742-3p|miR-497-5p|miR-500a-3p|miR-545-3p|miR-548av-3p|miR-5703|miR-592|miR-…	ANKRD17|DICER1|MYST3|RNF19A|ZNF207	-0.59	-0.11	-0.16	-0.48	0.44	0.47	0.47	0.64	1.95	0.2	0.31	0.88	1.94	9.49	9.65007	9.60063	9.01317	9.75912
SRPR	signal recognition particle receptor (docking protein)	protein coding	ENSG00000182934	6734	03060	GO:0005783|GO:0005789|GO:0006412|GO:0006613|GO:0006614|GO:0010467|GO:0016020|GO:0016021|GO:0030968|GO:0036498|GO:0044267|GO:0044822|GO:0070062	miR-1178-3p|miR-1183|miR-1237-3p|miR-1264|miR-1285-3p|miR-1324|miR-149-5p|miR-15a-5p|miR-15b-5p|miR-16-5p|miR-1910-3p|miR-1911-3p|miR-195-5p|miR-2054|miR-22-5p|miR-25-3p|miR-3064-3p|miR-3166|miR-3179|miR-3187-5p|miR-3191-5p|miR-3192-5p|miR-32-5p|miR-326|miR-330-5p|miR-34a-5p|miR-34c-5p|miR-3614-3p|miR-363-3p|miR-367-3p|miR-3686|miR-3689d|miR-374b-3p|miR-378j|miR-3915|miR-412-3p|miR-424-5p|miR-426…	ANAPC5|COPA|DDX3X|EPRS|GTF2I|LARP5|POLR2E|RB1|RELA|SEC23IP|STIP1|WDR1	0.78	0.52	0.39	0.26	0.58	0.62	0.62	0.85	1.95	1.03	0.69	0.27	2.15	9.04	9.01122	8.87796	9.65628	8.48876
Hs.471887		(NA)							-0.76	0.01	0.04	-0.77	0.56	0.61	0.61	0.83	1.95	0.02	0.05	1.19	1.52	8.67	8.86418	8.88581	8.12723	8.84943
MAK16	MAK16 homolog (S. cerevisiae)	protein coding	ENSG00000198042	84549		GO:0005730|GO:0043231|GO:0044822	miR-1197|miR-1236-3p|miR-1276|miR-1295b-3p|miR-130a-5p|miR-135a-3p|miR-1910-5p|miR-214-3p|miR-219a-1-3p|miR-23a-3p|miR-23b-3p|miR-23c|miR-29b-2-5p|miR-3074-3p|miR-30c-1-3p|miR-30c-2-3p|miR-3149|miR-32-3p|miR-3619-5p|miR-3650|miR-3658|miR-3668|miR-3692-3p|miR-3912-5p|miR-4282|miR-4286|miR-4328|miR-4426|miR-4446-5p|miR-4455|miR-4530|miR-4680-3p|miR-4704-3p|miR-4719|miR-4722-5p|miR-4738-3p|miR-4758-…		0.75	0.17	-0.71	0.59	0.56	0.6	0.6	0.82	1.95	0.25	1.62	0.82	1.75	8.22	8.51523	7.64147	8.3938	8.34902
AGTPBP1	ATP/GTP binding protein 1	protein coding	ENSG00000135049	23287		GO:0001754|GO:0004181|GO:0005634|GO:0005737|GO:0005739|GO:0005829|GO:0007005|GO:0015631|GO:0021702|GO:0021772|GO:0035609|GO:0035610|GO:0050905	miR-106a-3p|miR-106a-5p|miR-106b-5p|miR-129-5p|miR-1343-3p|miR-17-5p|miR-20a-5p|miR-20b-5p|miR-221-3p|miR-222-3p|miR-3162-5p|miR-33a-5p|miR-33b-5p|miR-3668|miR-4760-3p|miR-493-5p|miR-5002-5p|miR-519d-3p|miR-526b-3p|miR-548aa|miR-548ac|miR-548ap-3p|miR-548bb-3p|miR-548d-3p|miR-548h-3p|miR-548t-3p|miR-548z|miR-5702|miR-582-5p|miR-603|miR-6760-5p|miR-6783-3p|miR-6833-3p|miR-93-5p|miR-937-5p	ARID2|BBX|CUL3|HNRPD|KLHL8|MYST3|NR3C1|PIAS1|POU2F1|PSIP1|PTBP2|SFRS15|TRIM33|ZC3H6|ZCCHC7|ZNF493|ZNF638	-0.75	-0.16	-0.61	-0.58	0.55	0.6	0.6	0.81	1.95	0.25	1.34	0.83	3.28	5.84	6.24737	5.80211	5.05643	6.41186
A_22_P00002950		(NA)							0.96	-0.29	-0.67	1.25	0.71	0.76	0.76	1.04	1.95	0.37	1.08	1.66	1.2	5.62	5.5091	5.1358	6.09166	5.80109
TIAM1	T-cell lymphoma invasion and metastasis 1	protein coding	ENSG00000156299	7074	04014|04015|04024|04062|04810|05205	GO:0005085|GO:0005089|GO:0005515|GO:0005829|GO:0005886|GO:0005911|GO:0007160|GO:0007264|GO:0007411|GO:0016477|GO:0016601|GO:0019900|GO:0030676|GO:0031234|GO:0032092|GO:0043065|GO:0044291|GO:0048011|GO:0048013|GO:0051056|GO:0090630|GO:0097190|GO:1904338|GO:2000050	miR-106a-5p|miR-106b-5p|miR-10a-5p|miR-10b-5p|miR-1231|miR-1248|miR-1266-5p|miR-1277-5p|miR-129-1-3p|miR-129-2-3p|miR-1291|miR-1299|miR-1306-3p|miR-135a-5p|miR-135b-5p|miR-141-3p|miR-142-5p|miR-143-3p|miR-17-5p|miR-1825|miR-188-5p|miR-200a-3p|miR-2052|miR-20a-5p|miR-20b-5p|miR-21-3p|miR-21-5p|miR-210-5p|miR-2113|miR-22-3p|miR-2467-5p|miR-29a-5p|miR-302a-3p|miR-302b-3p|miR-302c-3p|miR-302d-3p|miR-…		2.41	-0.43	-2.24	2.84	1.79	1.94	1.94	2.64	1.95	0.19	1.59	1.44	1.34	5.21	5.44872	3.63292	6.04646	5.87782
A_22_P00014622		(NA)							-1.05	-0.11	-0.49	-0.94	0.78	0.84	0.84	1.14	1.95	0.11	0.63	0.99	2.5	5.17	5.63426	5.25356	4.20616	5.74578
GGT7	gamma-glutamyltransferase 7	protein coding	ENSG00000131067	2686	00430|00460|00480|01100	GO:0003840|GO:0005515|GO:0006749|GO:0019370|GO:0031362	miR-125a-5p|miR-125b-5p|miR-1343-5p|miR-145-5p|miR-197-3p|miR-204-3p|miR-210-5p|miR-30c-1-3p|miR-30c-2-3p|miR-3126-5p|miR-3192-5p|miR-324-5p|miR-326|miR-330-5p|miR-3658|miR-3922-5p|miR-4314|miR-4319|miR-4324|miR-4447|miR-4487|miR-4505|miR-450b-5p|miR-4531|miR-4534|miR-4639-5p|miR-4646-5p|miR-4779|miR-4780|miR-4786-5p|miR-490-3p|miR-514a-5p|miR-518a-5p|miR-5195-3p|miR-527|miR-5680|miR-5787|miR-608…		-0.84	-0.61	-0.39	-0.23	0.62	0.67	0.67	0.92	1.95	1.13	0.62	0.22	2.07	4.17	4.15783	4.37814	3.53641	4.76708
SPRR2C	small proline-rich protein 2C (pseudogene)	pseudogene							-0.75	0.03	0.27	-0.78	0.56	0.6	0.6	0.82	1.95	0.03	0.44	1.21	1.16	3.02	3.09385	3.33435	2.5826	3.06677
Hs.626043		(NA)							-0.87	-0.18	0.53	-0.69	0.65	0.7	0.7	0.95	1.95	0.23	0.88	0.84	1.24	2.85	2.67237	3.38056	2.50626	2.8536
NBEAP1	neurobeachin pseudogene 1	other ncRNA	ENSG00000279628						-0.88	-0.13	1.2	-0.75	0.65	0.7	0.7	0.96	1.95	0.15	2.67	0.93	2.63	2.76	2.25606	3.58802	2.71224	2.38342
ACPT	acid phosphatase, testicular	protein coding	ENSG00000142513	93650					-0.75	-0.34	-0.24	-0.4	0.55	0.6	0.6	0.81	1.95	0.62	0.4	0.51	1.87	2.71	2.78742	2.88789	2.14182	3.13068
LOC100507283	uncharacterized LOC100507283	asRNA	ENSG00000245498	100507283					0.74	0.18	0.22	0.56	0.55	0.59	0.59	0.81	1.95	0.28	0.35	0.79	1.93	2.58	2.39718	2.43182	3.1724	2.21483
RELB	v-rel avian reticuloendotheliosis viral oncogene homolog B	protein coding	ENSG00000104856	5971	04010|04064|04380|05166|05169	GO:0001047|GO:0002223|GO:0003700|GO:0003714|GO:0005515|GO:0005634|GO:0005654|GO:0005737|GO:0005829|GO:0032688|GO:0032922|GO:0033209|GO:0038061|GO:0045087	miR-3929|miR-4419b|miR-4437|miR-4478|miR-4674|miR-6749-3p|miR-6770-5p|miR-6895-5p|miR-7-5p|miR-7111-3p	NFKB1|NFKB2	-1.14	-1.6	0.31	0.46	0.85	0.91	0.91	1.24	1.95	2.74	0.32	0.35	3.03	9.07	8.0288	9.94418	8.80481	9.63191
A_33_P3277253		(NA)							0.65	0.24	-0.02	0.41	0.48	0.52	0.52	0.71	1.95	0.45	0.03	0.63	1.36	2.39	2.40249	2.14797	2.79602	2.16719
HSF2BP	heat shock transcription factor 2 binding protein	protein coding	ENSG00000160207	11077		GO:0005829|GO:0006366|GO:0007283|GO:0098779	miR-154-5p|miR-22-3p|miR-299-3p|miR-3175|miR-365a-3p|miR-365b-3p|miR-4450|miR-4475|miR-4516|miR-4643|miR-4654|miR-4700-5p|miR-4717-3p|miR-4728-3p|miR-4769-5p|miR-5096|miR-5579-5p|miR-5582-5p|miR-5680|miR-628-5p|miR-6795-5p|miR-6887-5p|miR-6890-5p|miR-7109-5p|miR-7515|miR-8069		-0.71	-0.26	0.51	-0.45	0.52	0.57	0.57	0.77	1.95	0.46	1.13	0.62	1.58	2.29	2.01515	2.78607	2.08024	2.27521
ENSG00000253500		asRNA	ENSG00000253500						0.66	-0.26	-0.11	0.92	0.49	0.53	0.53	0.72	1.95	0.5	0.18	1.8	1.8	2.26	1.95579	2.10495	2.76541	2.2145
HIPK1-AS1	HIPK1 antisense RNA 1	asRNA	ENSG00000235527	101928846					-0.83	-0.07	0.37	-0.76	0.62	0.67	0.67	0.91	1.95	0.08	0.59	1.02	1.11	2.19	2.16287	2.60098	1.76918	2.23301
A_21_P0012504		(NA)							0.55	-0.14	-0.14	0.69	0.41	0.44	0.44	0.6	1.95	0.28	0.29	1.57	1.46	2.13	1.95556	1.95443	2.50585	2.09211
Hs.709256		(NA)							-0.56	0.14	0.55	-0.7	0.41	0.45	0.45	0.61	1.94	0.29	1.74	1.56	1.39	9.85	9.80238	10.2152	9.65819	9.66154
A_33_P3255046		(NA)							0.74	-0.04	-0.93	0.78	0.55	0.59	0.59	0.81	1.94	0.05	2.36	1.24	2.03	9.81	10.0739	9.18632	9.92541	10.114
PLAUR	plasminogen activator, urokinase receptor	protein coding	ENSG00000011422	5329	04610|05205	GO:0001934|GO:0005102|GO:0005515|GO:0005788|GO:0005789|GO:0005886|GO:0005925|GO:0006501|GO:0006935|GO:0007165|GO:0007596|GO:0016255|GO:0019898|GO:0019899|GO:0019904|GO:0042730|GO:0043066|GO:0043388|GO:0043687|GO:0044267|GO:0045742|GO:0070062|GO:0090200|GO:2001243|GO:2001268	miR-150-3p|miR-16-2-3p|miR-195-3p|miR-196a-3p|miR-3120-3p|miR-3163|miR-338-5p|miR-377-3p|miR-4492|miR-4517|miR-4685-5p|miR-5008-5p|miR-5692a|miR-6512-3p|miR-6720-5p|miR-6837-5p	TNRC6A	1.13	-0.05	0.9	1.18	0.84	0.91	0.91	1.24	1.94	0.04	1.28	1.22	3.58	9.11	8.29799	9.24419	10.3788	8.34602
ZDHHC24	zinc finger, DHHC-type containing 24	protein coding	ENSG00000174165	254359		GO:0005515	miR-221-5p|miR-3690|miR-3922-5p|miR-4651|miR-4688|miR-4753-5p|miR-608|miR-6743-5p|miR-8073	CORO1B|ZNF581	0.73	-0.01	-0.01	0.74	0.54	0.59	0.59	0.8	1.94	0.01	0.01	1.17	1.56	8.63	8.43789	8.43714	9.16879	8.44786
CCDC127	coiled-coil domain containing 127	protein coding	ENSG00000164366	133957			miR-1324|miR-3150b-3p|miR-3162-5p|miR-3614-5p|miR-3919|miR-4299|miR-4325|miR-4633-3p|miR-4689|miR-4780|miR-4784|miR-542-3p|miR-548l|miR-593-3p|miR-6500-5p|miR-6793-3p|miR-6816-3p|miR-6828-3p|miR-6858-5p|miR-767-3p		0.79	-0.02	-0.28	0.81	0.59	0.64	0.64	0.87	1.94	0.02	0.43	1.18	1.15	7.57	7.49643	7.2351	8.02972	7.51205
PRRT3	proline-rich transmembrane protein 3	protein coding	ENSG00000163704	285368			miR-10a-5p|miR-10b-5p|miR-1271-5p|miR-3121-3p|miR-4294|miR-4296|miR-5004-5p|miR-504-3p|miR-548e-5p|miR-6758-5p|miR-6778-3p|miR-92a-2-5p|miR-96-5p		-0.85	0.07	-0.02	-0.92	0.63	0.68	0.68	0.93	1.94	0.08	0.03	1.28	1.72	7.32	7.61379	7.51935	6.6675	7.54399
SYNE2	spectrin repeat containing, nuclear envelope 2	protein coding	ENSG00000054654	23224		GO:0003779|GO:0005515|GO:0005634|GO:0005635|GO:0005737|GO:0005739|GO:0005925|GO:0007097|GO:0016235|GO:0016529|GO:0030018|GO:0030335|GO:0031022|GO:0031258|GO:0031527|GO:0031965|GO:0031981|GO:0034993|GO:0045111|GO:0051642|GO:0070062|GO:0090286	miR-1202|miR-1227-5p|miR-1264|miR-1276|miR-3926|miR-3927-5p|miR-3972|miR-4282|miR-4528|miR-454-5p|miR-4727-5p|miR-4764-5p|miR-4794|miR-493-5p|miR-494-3p|miR-548a-3p|miR-548ar-3p|miR-548az-3p|miR-548c-3p|miR-548e-3p|miR-548f-3p|miR-548s|miR-5581-3p|miR-664a-5p|miR-8057		-1.39	0.19	0.79	-1.58	1.04	1.12	1.12	1.52	1.94	0.14	0.82	1.37	1.11	6.12	6.20309	6.80602	5.41671	6.01221
Hs.734761		(NA)							-0.91	-0.39	0.89	-0.52	0.68	0.73	0.73	1	1.94	0.56	1.69	0.54	2.16	6.03	5.51158	6.78914	5.88078	5.90208
Hs.461285		(NA)							0.97	0.46	-0.64	0.51	0.72	0.78	0.78	1.06	1.94	0.63	0.99	0.49	1.63	5.6	6.01491	4.91846	5.88907	5.55853
COMMD2	COMM domain containing 2	protein coding	ENSG00000114744	51122		GO:0005515	miR-1273f|miR-1273g-3p|miR-138-2-3p|miR-143-3p|miR-183-3p|miR-185-5p|miR-203b-3p|miR-29a-3p|miR-29b-3p|miR-29c-3p|miR-302f|miR-3138|miR-3154|miR-3163|miR-3173-3p|miR-3179|miR-3190-3p|miR-32-3p|miR-3201|miR-338-5p|miR-3613-3p|miR-379-3p|miR-3920|miR-3924|miR-411-3p|miR-4274|miR-4306|miR-4423-5p|miR-4539|miR-4644|miR-4719|miR-4724-5p|miR-4744|miR-4762-3p|miR-4770|miR-4795-3p|miR-513c-5p|miR-514b-5p…	CSTF1|DBF4|FBXO5|SYNCRIP|WDSOF1	1.01	0.02	-0.92	0.98	0.75	0.81	0.81	1.1	1.94	0.02	1.56	1.12	1.46	5.27	5.51179	4.56599	5.57194	5.49041
ARHGAP44	Rho GTPase activating protein 44	protein coding	ENSG00000006740	9912		GO:0005515|GO:0005543|GO:0005829|GO:0007264|GO:0031256|GO:0051056	let-7a-3p|let-7b-3p|let-7f-1-3p|miR-1258|miR-137|miR-1911-3p|miR-1915-5p|miR-197-3p|miR-3148|miR-331-5p|miR-3929|miR-3974|miR-432-3p|miR-4419b|miR-4425|miR-4443|miR-4478|miR-450a-1-3p|miR-450a-2-3p|miR-4534|miR-4639-3p|miR-4668-5p|miR-4673|miR-4704-3p|miR-4760-5p|miR-4792|miR-485-5p|miR-486-5p|miR-493-5p|miR-5006-5p|miR-5093|miR-548an|miR-5582-5p|miR-6083|miR-651-3p|miR-6516-3p|miR-656-3p|miR-673…		1.1	0.62	-0.74	0.48	0.82	0.88	0.88	1.2	1.94	0.81	1.02	0.38	1.81	5.2	5.75245	4.39525	5.49133	5.13153
SKA1	spindle and kinetochore associated complex subunit 1	protein coding	ENSG00000262634	220134		GO:0000278|GO:0000940|GO:0005515|GO:0005829|GO:0005876|GO:0007059|GO:0007067|GO:0007264|GO:0008017|GO:0031110|GO:0051301	miR-1184|miR-1273h-5p|miR-1277-5p|miR-190a-3p|miR-196a-3p|miR-204-3p|miR-28-5p|miR-30b-3p|miR-3139|miR-3613-3p|miR-3689a-3p|miR-3689b-3p|miR-3689c|miR-371b-5p|miR-373-5p|miR-4261|miR-4291|miR-4478|miR-4486|miR-4496|miR-4499|miR-4646-5p|miR-4691-3p|miR-4755-3p|miR-485-5p|miR-5011-5p|miR-548at-5p|miR-561-3p|miR-6089|miR-616-5p|miR-661|miR-6722-5p|miR-6732-3p|miR-6742-3p|miR-6769a-3p|miR-6779-5p|miR…		1.49	0.75	-1.03	0.75	1.11	1.2	1.2	1.63	1.94	0.69	1.06	0.46	1.73	5.09	5.79355	4.01695	5.50957	5.04658
A_33_P3404047		(NA)							0.94	0.27	-0.69	0.67	0.7	0.75	0.75	1.03	1.94	0.33	1.16	0.73	1.48	4.75	5.06584	4.10708	5.0456	4.80066
ZNF608	zinc finger protein 608	protein coding	ENSG00000168916	57507			let-7a-3p|let-7b-3p|let-7f-1-3p|let-7f-2-3p|miR-10a-5p|miR-10b-5p|miR-1179|miR-1185-1-3p|miR-1185-2-3p|miR-1238-5p|miR-1243|miR-125b-2-3p|miR-1261|miR-1277-5p|miR-129-5p|miR-1297|miR-140-5p|miR-153-5p|miR-186-5p|miR-190a-3p|miR-190a-5p|miR-190b|miR-1911-3p|miR-203a-3p|miR-21-3p|miR-26a-5p|miR-26b-5p|miR-28-3p|miR-29b-1-5p|miR-30a-5p|miR-30b-5p|miR-30c-5p|miR-30d-5p|miR-30e-5p|miR-3120-3p|miR-3163…		-1.45	0.1	-0.58	-1.56	1.08	1.17	1.17	1.59	1.94	0.07	0.51	1.26	2.56	3.78	4.55218	3.86797	2.41646	4.44748
LOC101929241	uncharacterized LOC101929241	lincRNA	ENSG00000246084	101929241					0.73	-0.44	-0.9	1.17	0.54	0.59	0.59	0.8	1.94	0.87	2.3	2.16	1.68	3.18	3.14118	2.67992	3.40977	3.57812
LINC00426	lincRNA 426	lincRNA	ENSG00000238121	100188949					0.89	0.73	-0.4	0.17	0.67	0.72	0.72	0.98	1.94	1.32	0.6	0.14	1.95	2.93	3.44339	2.31177	3.20618	2.71419
Hs.190261		(NA)							-0.85	0.47	0.96	-1.32	0.63	0.68	0.68	0.93	1.94	0.79	2.07	2.09	1.56	2.52	2.58079	3.07403	2.22483	2.11032
A_21_P0005753		(NA)							0.84	0.36	0.31	0.48	0.62	0.67	0.67	0.92	1.94	0.56	0.46	0.54	1.95	2.61	2.48441	2.43593	3.27379	2.12574
A_22_P00018221		(NA)							0.83	0.56	-0.02	0.28	0.62	0.67	0.67	0.91	1.94	1.01	0.02	0.28	1.51	2.42	2.61571	2.04134	2.87598	2.05907
A_33_P3335905		(NA)							1.01	-0.25	-0.31	1.26	0.75	0.81	0.81	1.11	1.94	0.28	0.37	1.55	1.36	2.33	2.05028	1.98604	2.99428	2.29862
A_33_P3340109		(NA)							0.66	0.04	0.12	0.63	0.49	0.53	0.53	0.73	1.94	0.05	0.19	1.07	1.87	2.32	2.11063	2.19289	2.85742	2.0739
CDC37	cell division cycle 37	protein coding	ENSG00000105401	11140	04151	GO:0000079|GO:0005515|GO:0005737|GO:0005829|GO:0006605|GO:0019900|GO:0031072|GO:0051082|GO:0060334|GO:0060338|GO:0070062	miR-1324|miR-328-5p|miR-4486|miR-4505|miR-4767|miR-5190|miR-5787|miR-6769a-3p|miR-6810-5p|miR-6829-5p|miR-6885-5p|miR-8055|miR-922	COPE|ELAVL1|GCN1L1|KIAA0692|POLR2E|PRPF4|YBX1	0.63	-0.15	-0.66	0.79	0.47	0.51	0.51	0.7	1.93	0.28	1.83	1.54	1.44	9.16	9.22371	8.72124	9.35429	9.37868
CDK19	cyclin-dependent kinase 19	protein coding	ENSG00000155111	23097			let-7a-3p|let-7b-3p|let-7f-1-3p|miR-1-5p|miR-106a-3p|miR-1179|miR-1202|miR-1206|miR-1255b-2-3p|miR-1257|miR-126-5p|miR-1273h-3p|miR-1275|miR-1279|miR-1295b-5p|miR-1302|miR-1305|miR-130a-3p|miR-130b-3p|miR-132-3p|miR-140-3p|miR-141-3p|miR-142-5p|miR-144-3p|miR-1468-3p|miR-147a|miR-148a-3p|miR-148b-3p|miR-148b-5p|miR-152-3p|miR-153-5p|miR-1827|miR-186-5p|miR-18a-5p|miR-18b-5p|miR-1910-5p|miR-1912|m…		-0.75	-0.25	0.03	-0.51	0.56	0.61	0.61	0.83	1.93	0.39	0.04	0.67	1.33	8.01	8.01798	8.29291	7.5407	8.26403
HGF	hepatocyte growth factor (hepapoietin A; scatter factor)	protein coding	ENSG00000019991	3082	04014|04015|04060|04151|04510|05144|05200|05205|05211|05218	GO:0001837|GO:0002576|GO:0005515|GO:0005576|GO:0007596|GO:0014068|GO:0016020|GO:0030168|GO:0030335|GO:0031093|GO:0035729|GO:0042056|GO:0042802|GO:0043154|GO:0048012|GO:0050731|GO:0050918|GO:0060326|GO:0060665|GO:0090201|GO:1901299|GO:2000573	miR-1288-3p|miR-2277-3p|miR-340-5p|miR-4640-5p|miR-4679|miR-4726-5p|miR-5589-5p|miR-668-3p|miR-6811-5p|miR-6895-5p|miR-892c-5p		1.02	-0.25	0.17	1.27	0.76	0.82	0.82	1.12	1.93	0.27	0.17	1.54	2.24	7.92	7.38085	7.79381	8.81703	7.62817
A_21_P0013475		(NA)							-1.64	-0.77	0.07	-0.86	1.22	1.32	1.32	1.8	1.93	0.63	0.04	0.49	1.35	7.39	7.22677	8.06824	6.43297	7.99935
A_21_P0005594		(NA)							-0.73	-0.3	0.21	-0.43	0.54	0.59	0.59	0.8	1.93	0.53	0.33	0.56	1.24	6.43	6.29123	6.79816	6.07123	6.59215
FLYWCH1	FLYWCH-type zinc finger 1	protein coding	ENSG00000059122	84256		GO:0005654|GO:0005737		ASB10|IGHMBP2|KRT7|TRIM10|TTC7B	0.95	-0.11	-0.02	1.06	0.71	0.77	0.77	1.05	1.93	0.11	0.02	1.32	1.65	5.23	4.90342	4.99294	5.94557	5.00876
HAS2-AS1	HAS2 antisense RNA 1	asRNA	ENSG00000248690						-0.89	-0.3	-1.4	-0.59	0.66	0.72	0.72	0.98	1.93	0.41	3.13	0.66	5.11	4.81	5.57286	4.47022	3.58123	5.87082
A_22_P00025539		(NA)							0.93	0	-0.35	0.93	0.69	0.75	0.75	1.02	1.93	0	0.46	1.14	1.12	3.64	3.57412	3.22565	4.15445	3.5716
Hs.745127		(NA)							1.08	0.14	-0.83	0.94	0.81	0.87	0.87	1.19	1.93	0.13	1.22	0.95	1.33	3.4	3.66021	2.6906	3.77255	3.52243
A_22_P00017203		(NA)							-0.91	-0.55	0.03	-0.36	0.68	0.73	0.73	1	1.93	0.88	0.03	0.34	1.44	2.62	2.44955	3.02302	2.1167	2.99748
Hs.712528		(NA)							0.77	0.31	-0.21	0.46	0.57	0.62	0.62	0.85	1.93	0.51	0.32	0.58	1.23	2.56	2.69012	2.17171	2.94039	2.38308
ASB2	ankyrin repeat and SOCS box containing 2	protein coding	ENSG00000100628	51676		GO:0002230|GO:0005515|GO:0007165|GO:0098779|GO:0098792	miR-185-5p|miR-3180-5p|miR-4306|miR-4319|miR-4324|miR-4451|miR-4644|miR-597-5p|miR-642a-3p|miR-642b-3p|miR-6796-3p|miR-6828-3p|miR-6840-3p	LDB3	-1.09	-0.1	0.65	-0.98	0.81	0.88	0.88	1.2	1.93	0.09	0.86	1	1.14	2.55	2.41784	3.16884	2.07995	2.52185
A_33_P3334703		(NA)							-0.81	0.21	0.68	-1.02	0.61	0.65	0.65	0.89	1.93	0.29	1.37	1.56	1.22	2.55	2.55409	3.02304	2.21424	2.34461
A_33_P3288814		(NA)							-0.9	-0.53	0.58	-0.38	0.67	0.73	0.73	0.99	1.93	0.84	0.96	0.36	1.79	2.54	2.08689	3.19623	2.29196	2.61443
A_33_P3342953		(NA)							-0.83	-0.26	0.62	-0.57	0.62	0.67	0.67	0.91	1.93	0.37	1.18	0.69	1.52	2.41	2.10546	2.98874	2.15719	2.3645
SCGB1D1	secretoglobin, family 1D, member 1	protein coding	ENSG00000168515	10648		GO:0005615|GO:0046982			0.61	0.2	-0.25	0.41	0.46	0.49	0.49	0.67	1.93	0.39	0.52	0.67	1.2	2.34	2.45468	2.00533	2.6177	2.25479
Hs.653055		(NA)							-0.85	0.18	0.59	-1.03	0.64	0.69	0.69	0.94	1.93	0.23	1.05	1.48	1.14	2.32	2.35998	2.7716	1.92077	2.18343
A_21_P0002471		(NA)							-0.71	-0.62	0.05	-0.08	0.53	0.57	0.57	0.78	1.93	1.47	0.07	0.09	1.76	2.31	2.01779	2.69315	1.98641	2.64042
HYMAI	hydatidiform mole associated and imprinted (non-protein coding)	lncRNA							-0.9	-0.28	1.29	-0.62	0.68	0.73	0.73	0.99	1.92	0.37	2.77	0.68	3.03	5.73	5.07351	6.64574	5.74603	5.35584
RRP7A	ribosomal RNA processing 7 homolog A (S. cerevisiae)	protein coding	ENSG00000189306	27341	03008	GO:0005515|GO:0044822	miR-1202|miR-1207-5p|miR-122-5p|miR-1227-5p|miR-1228-3p|miR-1273h-5p|miR-1281|miR-1304-3p|miR-1343-3p|miR-145-5p|miR-1827|miR-188-3p|miR-197-3p|miR-1976|miR-204-3p|miR-24-3p|miR-301a-5p|miR-301b-5p|miR-30b-3p|miR-3135a|miR-3173-5p|miR-3176|miR-3188|miR-3190-5p|miR-3192-5p|miR-326|miR-330-5p|miR-3611|miR-3653-5p|miR-3689a-3p|miR-3689b-3p|miR-3689c|miR-3934-3p|miR-3972|miR-4258|miR-4294|miR-4296|mi…		1.03	1.18	-0.45	-0.15	0.77	0.83	0.83	1.13	1.92	2.08	0.56	0.11	2.63	5.31	6.1368	4.51105	5.53745	4.95712
PIP4K2C	phosphatidylinositol-5-phosphate 4-kinase, type II, gamma	protein coding	ENSG00000166908	79837	00562|04070|04810	GO:0005776|GO:0005829|GO:0006644|GO:0006661|GO:0010506|GO:0042802|GO:0044281|GO:0070062|GO:2000786	let-7a-2-3p|let-7g-3p|miR-106a-5p|miR-106b-5p|miR-1224-3p|miR-1233-5p|miR-124-3p|miR-1249-5p|miR-1252-5p|miR-1260a|miR-1260b|miR-1273e|miR-1273f|miR-1276|miR-1294|miR-138-5p|miR-17-5p|miR-185-3p|miR-185-5p|miR-20a-5p|miR-20b-5p|miR-30c-1-3p|miR-30c-2-3p|miR-3125|miR-3140-5p|miR-3179|miR-3183|miR-3191-5p|miR-326|miR-330-5p|miR-361-3p|miR-3617-3p|miR-363-5p|miR-3679-3p|miR-3916|miR-3938|miR-4293|mi…		0.93	-0.29	-0.82	1.22	0.7	0.75	0.75	1.02	1.92	0.38	1.48	1.66	1.26	4.4	4.3742	3.84475	4.77375	4.66832
A_33_P3359856		(NA)							-0.89	0.15	-0.4	-1.03	0.66	0.72	0.72	0.98	1.92	0.17	0.58	1.4	2.81	4.2	4.7593	4.21724	3.32981	4.61265
C8orf37-AS1	C8orf37 antisense RNA 1	asRNA							0.77	-0.44	-0.6	1.2	0.57	0.62	0.62	0.84	1.92	0.81	1.25	2.09	1.37	3.02	2.81406	2.64835	3.41354	3.24981
VIPR1	vasoactive intestinal peptide receptor 1	protein coding	ENSG00000114812	7433	04080	GO:0005515|GO:0005886|GO:0005887|GO:0006936|GO:0006955|GO:0007186|GO:0007187|GO:0007268|GO:0007586|GO:0008284|GO:0043235	miR-1271-5p|miR-1324|miR-192-3p|miR-3123|miR-374c-5p|miR-4294|miR-4481|miR-4691-5p|miR-6510-5p|miR-655-3p|miR-6792-3p|miR-6805-5p|miR-6868-5p|miR-8071|miR-96-5p		-2.49	0.15	3.52	-2.64	1.86	2.01	2.01	2.74	1.92	0.06	2.73	1.23	2.39	3.44	2.33285	5.69964	3.21401	2.18257
ENSG00000279187		other ncRNA	ENSG00000279187						-0.9	-0.12	0.48	-0.79	0.68	0.73	0.73	1	1.92	0.13	0.73	0.94	1.11	3.1	3.00538	3.59765	2.69512	3.12119
ORM1	orosomucoid 1	protein coding	ENSG00000229314	5004		GO:0005515|GO:0005615|GO:0006954|GO:0032715|GO:0032720|GO:0070062|GO:0072562	miR-6834-5p|miR-7162-3p		-1.08	-0.12	0.94	-0.96	0.81	0.88	0.88	1.2	1.92	0.11	1.42	0.96	1.44	2.97	2.66401	3.72578	2.64287	2.78659
MIR210HG	MIR210 host gene (non-protein coding)	lncRNA							-1.29	-0.5	0.89	-0.79	0.96	1.04	1.04	1.42	1.92	0.49	1.04	0.59	1.53	2.86	2.35898	3.74544	2.45998	2.85879
A_22_P00009054		(NA)							0.68	-0.2	-0.85	0.89	0.51	0.55	0.55	0.75	1.92	0.35	2.3	1.62	1.74	2.66	2.77413	2.13314	2.816	2.97845
Hs.675320		(NA)							-0.7	0.1	0.68	-0.8	0.53	0.57	0.57	0.78	1.92	0.14	1.64	1.36	1.38	2.51	2.4055	2.98504	2.28029	2.30713
GABRA2	gamma-aminobutyric acid (GABA) A receptor, alpha 2	protein coding	ENSG00000151834	2555	04080|04723|04727|04742|05032|05033	GO:0001505|GO:0005886|GO:0006836|GO:0007214|GO:0007268|GO:0008503|GO:0030285|GO:0034220|GO:0055085|GO:0099565	miR-127-5p|miR-1284|miR-136-5p|miR-146a-3p|miR-1537-5p|miR-186-3p|miR-196a-5p|miR-196b-5p|miR-2115-5p|miR-216b-5p|miR-302c-5p|miR-3167|miR-345-5p|miR-3671|miR-374b-3p|miR-4275|miR-4303|miR-4494|miR-4503|miR-4709-5p|miR-4714-5p|miR-493-5p|miR-5195-5p|miR-548an|miR-548p|miR-5571-3p|miR-580-5p|miR-591|miR-607|miR-6510-5p|miR-6715a-3p|miR-876-5p|miR-934|miR-942-3p		0.98	0.2	0.07	0.78	0.73	0.79	0.79	1.08	1.92	0.22	0.07	0.83	1.5	2.5	2.34357	2.21494	3.19001	2.14454
A_22_P00017774		(NA)							0.71	0.55	0.15	0.16	0.53	0.57	0.57	0.78	1.92	1.23	0.23	0.17	1.72	2.48	2.61931	2.22063	2.9258	2.06984
A_22_P00007603		(NA)							-0.67	0.28	0.58	-0.95	0.5	0.54	0.54	0.73	1.92	0.55	1.44	1.84	1.28	2.45	2.53074	2.82726	2.16143	2.24633
RTP2	receptor (chemosensory) transporter protein 2	protein coding	ENSG00000198471	344892		GO:0005515|GO:0009986|GO:0031849|GO:0051205	miR-3137|miR-4317|miR-5008-5p|miR-6165		0.7	-0.29	-0.32	0.98	0.52	0.56	0.56	0.77	1.92	0.53	0.6	1.82	1.38	2.44	2.2103	2.18179	2.87715	2.49981
A_22_P00007762		(NA)							0.67	0.35	-0.16	0.32	0.5	0.54	0.54	0.74	1.92	0.71	0.26	0.43	1.32	2.31	2.46962	1.96468	2.63529	2.12306
A_21_P0012432		(NA)							-0.7	0.04	0.41	-0.74	0.53	0.57	0.57	0.77	1.92	0.05	0.84	1.22	1.09	2.24	2.23879	2.61135	1.91162	2.20085
CCL22	chemokine (C-C motif) ligand 22	protein coding	ENSG00000102962	6367	04060|04062	GO:0005576|GO:0006935|GO:0006955|GO:0007165|GO:0007267|GO:0009615	miR-1199-5p|miR-1207-5p|miR-1249-5p|miR-1273h-5p|miR-1275|miR-1296-3p|miR-149-3p|miR-1827|miR-1915-3p|miR-30b-3p|miR-3125|miR-3126-5p|miR-3135b|miR-3148|miR-3150a-3p|miR-3175|miR-3184-5p|miR-34a-5p|miR-34c-5p|miR-3678-3p|miR-3689a-3p|miR-3689b-3p|miR-3689c|miR-369-3p|miR-3691-3p|miR-371b-5p|miR-373-5p|miR-374a-5p|miR-374b-5p|miR-3910|miR-3916|miR-423-5p|miR-4270|miR-4271|miR-4303|miR-4419a|miR-44…		0.79	-0.28	-0.29	1.07	0.59	0.64	0.64	0.87	1.92	0.44	0.45	1.73	1.41	2.18	1.91811	1.91373	2.70238	2.20123
A_21_P0005953		(NA)							0.62	0.02	-0.16	0.6	0.47	0.5	0.5	0.69	1.92	0.03	0.28	1.08	1.18	2.06	1.99109	1.8117	2.43372	1.96855
LOX	lysyl oxidase	protein coding	ENSG00000113083	4015		GO:0005515|GO:0005576|GO:0006464|GO:0030198	miR-101-5p|miR-1185-5p|miR-126-5p|miR-1299|miR-1304-3p|miR-135a-3p|miR-145-5p|miR-149-5p|miR-153-5p|miR-16-1-3p|miR-181a-5p|miR-181b-5p|miR-181c-5p|miR-181d-5p|miR-182-5p|miR-183-5p|miR-186-5p|miR-190a-3p|miR-1910-3p|miR-200b-3p|miR-200c-3p|miR-203a-3p|miR-206|miR-21-3p|miR-218-5p|miR-22-5p|miR-24-3p|miR-29a-3p|miR-29b-2-5p|miR-29b-3p|miR-29c-3p|miR-3065-3p|miR-3115|miR-3153|miR-3156-3p|miR-3163|…	ASB10|FBXL18|PHLDB1|VAC14	1.15	-0.33	0.46	1.48	0.87	0.93	0.93	1.27	1.91	0.33	0.51	1.59	2.89	10.8	10.0114	10.7999	11.9505	10.3378
MORC4	MORC family CW-type zinc finger 4	protein coding	ENSG00000133131	79710		GO:0005515|GO:0005654	miR-1249-5p|miR-1253|miR-1304-3p|miR-1321|miR-1324|miR-149-3p|miR-154-3p|miR-185-5p|miR-2682-3p|miR-3154|miR-3185|miR-3714|miR-3910|miR-3925-5p|miR-4297|miR-4306|miR-4311|miR-4419a|miR-4428|miR-4499|miR-4510|miR-4540|miR-4644|miR-4662a-3p|miR-4672|miR-4728-5p|miR-4739|miR-4756-5p|miR-4773|miR-487a-3p|miR-5010-3p|miR-5197-3p|miR-548a-3p|miR-548an|miR-548ar-3p|miR-548az-3p|miR-548e-3p|miR-548f-3p|m…		0.75	-0.07	0.78	0.83	0.57	0.61	0.61	0.84	1.91	0.1	1.8	1.28	4.26	9.1	8.43266	9.28593	10.0399	8.50613
ITGB8	integrin, beta 8	protein coding	ENSG00000105855	3696	04151|04510|04512|04514|04810|05410|05412|05414	GO:0005886|GO:0007155|GO:0008305|GO:0009986|GO:0010628|GO:0010629|GO:0030198|GO:0034686|GO:0051216|GO:0060674|GO:0070062|GO:1990430	miR-100-3p|miR-106a-5p|miR-106b-5p|miR-1245a|miR-127-5p|miR-1279|miR-1297|miR-130a-3p|miR-130b-3p|miR-1322|miR-141-3p|miR-143-3p|miR-145-5p|miR-146a-3p|miR-17-5p|miR-182-5p|miR-1825|miR-1827|miR-183-5p|miR-190a-3p|miR-197-5p|miR-1976|miR-199a-3p|miR-199b-3p|miR-19a-3p|miR-19b-3p|miR-200a-3p|miR-204-3p|miR-205-3p|miR-208a-5p|miR-208b-5p|miR-20a-5p|miR-20b-5p|miR-2117|miR-26a-5p|miR-26b-5p|miR-300|…	PDLIM4	-1.64	0.34	2.1	-1.98	1.23	1.33	1.33	1.82	1.91	0.23	2.39	1.46	1.89	5.76	5.33162	7.08728	5.45013	4.9882
ZNF33A	zinc finger protein 33A	protein coding	ENSG00000189180	7581			miR-101-3p|miR-124-5p|miR-1255b-2-3p|miR-126-5p|miR-1294|miR-148a-5p|miR-149-5p|miR-150-5p|miR-154-3p|miR-17-3p|miR-18b-3p|miR-20a-3p|miR-218-2-3p|miR-2861|miR-296-3p|miR-302f|miR-3123|miR-3125|miR-3182|miR-3192-3p|miR-337-3p|miR-3613-3p|miR-3686|miR-3692-3p|miR-374c-5p|miR-3916|miR-4261|miR-4279|miR-4291|miR-4326|miR-4451|miR-4495|miR-4633-5p|miR-4684-5p|miR-4698|miR-4728-3p|miR-4766-5p|miR-4803…		-0.78	0.39	0.1	-1.17	0.59	0.63	0.63	0.86	1.91	0.67	0.12	1.95	2.03	5.46	5.89529	5.60541	4.8244	5.50921
A_21_P0010303		(NA)							0.99	0.06	-0.09	0.92	0.74	0.8	0.8	1.09	1.91	0.06	0.09	1.03	1.34	4.71	4.53918	4.38288	5.37013	4.47516
BEGAIN	brain-enriched guanylate kinase-associated	protein coding	ENSG00000183092	57596		GO:0005515	let-7a-5p|let-7b-5p|let-7c-5p|let-7d-5p|let-7e-5p|let-7f-5p|let-7g-5p|let-7i-5p|miR-101-3p|miR-1207-5p|miR-1275|miR-1468-3p|miR-3135b|miR-3138|miR-3180|miR-3180-3p|miR-3196|miR-3927-3p|miR-4451|miR-4458|miR-4492|miR-4500|miR-4505|miR-4665-5p|miR-4711-5p|miR-4731-5p|miR-4747-5p|miR-4763-3p|miR-4790-5p|miR-486-3p|miR-5193|miR-5196-5p|miR-5787|miR-6090|miR-6132|miR-654-3p|miR-6780b-3p|miR-6816-5p|mi…		1.27	-0.58	-1.14	1.85	0.96	1.03	1.03	1.41	1.91	0.59	1.49	1.88	1.29	4.24	4.08266	3.51955	4.79088	4.66039
A_21_P0009544		(NA)							0.77	0.82	-0.6	-0.05	0.58	0.63	0.63	0.86	1.91	1.88	1.21	0.05	3.04	3.85	4.56646	3.14702	3.9195	3.74272
LOC105369197	uncharacterized LOC105369197	other ncRNA							0.88	0.23	-0.54	0.65	0.66	0.72	0.72	0.97	1.91	0.3	0.89	0.75	1.27	3.01	3.23663	2.46504	3.34382	3.00554
A_21_P0005007		(NA)							0.92	0.56	-0.66	0.37	0.7	0.75	0.75	1.03	1.91	0.86	1.09	0.34	1.92	2.99	3.50521	2.28837	3.21259	2.94962
A_22_P00012026		(NA)							0.81	0.02	-0.32	0.79	0.61	0.66	0.66	0.89	1.91	0.03	0.5	1.09	1.09	2.98	2.95364	2.60998	3.41846	2.93089
A_21_P0002333		(NA)							-0.78	0.45	0.79	-1.23	0.59	0.63	0.63	0.86	1.91	0.82	1.77	2.09	1.43	2.48	2.59634	2.93972	2.16253	2.14742
A_33_P3374221		(NA)							-0.89	0.18	0.76	-1.07	0.67	0.72	0.72	0.98	1.91	0.22	1.38	1.46	1.21	2.45	2.41611	2.99006	2.10277	2.2338
A_33_P3225128		(NA)							-1.04	0.3	1.04	-1.33	0.78	0.84	0.84	1.15	1.91	0.33	1.72	1.59	1.36	2.33	2.27342	3.01266	1.9757	1.97734
A_22_P00002470		(NA)							0.96	0.3	-0.07	0.66	0.72	0.78	0.78	1.06	1.91	0.37	0.07	0.68	1.28	2.26	2.26534	1.89675	2.85243	1.96644
A_21_P0013625		(NA)							0.61	-0.19	-0.37	0.79	0.46	0.49	0.49	0.67	1.91	0.37	0.89	1.64	1.17	2.26	2.16002	1.97636	2.5819	2.34896
FGF23	fibroblast growth factor 23	protein coding	ENSG00000118972	8074	04010|04014|04015|04151|04810|05200|05218	GO:0000165|GO:0000186|GO:0005576|GO:0005615|GO:0005622|GO:0007173|GO:0007264|GO:0007265|GO:0007411|GO:0008286|GO:0008543|GO:0010966|GO:0010980|GO:0030502|GO:0038095|GO:0042369|GO:0045087|GO:0045668|GO:0046888|GO:0048010|GO:0048011|GO:0048015|GO:0055062	miR-1227-5p|miR-1303|miR-1321|miR-2682-3p|miR-28-5p|miR-3139|miR-3179|miR-3189-3p|miR-323a-5p|miR-34a-5p|miR-34c-5p|miR-3973|miR-4419a|miR-4436b-3p|miR-4446-5p|miR-449a|miR-449b-5p|miR-4659a-5p|miR-4659b-5p|miR-4739|miR-4756-5p|miR-4776-3p|miR-548az-5p|miR-548t-5p|miR-5582-3p|miR-583|miR-6077|miR-6132|miR-619-3p|miR-651-3p|miR-6762-5p|miR-6771-3p|miR-6781-3p|miR-6836-5p|miR-6845-5p|miR-6888-3p|mi…		0.8	0.1	-0.12	0.71	0.61	0.65	0.65	0.89	1.91	0.12	0.16	0.95	1.23	2.15	2.07594	1.85424	2.65831	1.97846
LOC100506679	uncharacterized LOC100506679	asRNA	ENSG00000230319	100506679					-0.64	0.08	1.41	-0.72	0.48	0.52	0.52	0.71	1.9	0.12	4.55	1.31	4.37	13.65	13.1295	14.4599	13.822	13.0519
MGST1	microsomal glutathione S-transferase 1	protein coding	ENSG00000008394	4257	00480|00980|00982|05204	GO:0004364|GO:0004602|GO:0005515|GO:0005739|GO:0005778|GO:0005783|GO:0005789|GO:0006805|GO:0016021|GO:0044281|GO:0055114|GO:0070207|GO:0071449|GO:0098869|GO:1901687	miR-335-3p|miR-3606-3p|miR-376a-5p|miR-4291|miR-4495|miR-4528|miR-513a-3p|miR-513c-3p|miR-548av-5p|miR-548az-5p|miR-548c-3p|miR-548k|miR-548u|miR-6074|miR-640|miR-6507-5p|miR-664a-3p|miR-6728-3p|miR-6818-5p|miR-8054|miR-8087		0.78	0	-2.51	0.78	0.59	0.64	0.64	0.87	1.9	0	6.63	1.13	7.01	12.19	13.3224	10.8094	11.5873	13.3238
BZW2	basic leucine zipper and W2 domains 2	protein coding	ENSG00000136261	28969		GO:0016020	let-7a-5p|let-7b-5p|let-7c-5p|let-7d-5p|let-7e-5p|let-7f-5p|let-7g-5p|let-7i-5p|miR-1267|miR-135a-5p|miR-135b-5p|miR-136-5p|miR-3127-5p|miR-3173-3p|miR-3174|miR-3180|miR-3180-3p|miR-3196|miR-3677-5p|miR-3927-3p|miR-4294|miR-4451|miR-4458|miR-4500|miR-4729|miR-5087|miR-5088-5p|miR-548a-3p|miR-548ar-3p|miR-548az-3p|miR-548az-5p|miR-548e-3p|miR-548f-3p|miR-548t-5p|miR-5588-3p|miR-582-3p|miR-653-5p|m…	COPS5	0.82	0.22	-0.42	0.6	0.62	0.67	0.67	0.91	1.9	0.31	0.69	0.74	1.18	10.77	10.9324	10.2918	11.114	10.7108
A_33_P3249185		(NA)							0.68	0.22	-0.69	0.46	0.51	0.56	0.56	0.76	1.9	0.38	1.73	0.67	1.98	10.12	10.4684	9.56385	10.2451	10.2504
FBXW4	F-box and WD repeat domain containing 4	protein coding	ENSG00000107829	6468			miR-125a-5p|miR-125b-5p|miR-130b-5p|miR-1343-3p|miR-204-3p|miR-3151-5p|miR-330-3p|miR-3646|miR-3662|miR-3936|miR-4314|miR-4319|miR-4492|miR-4645-5p|miR-4646-5p|miR-4673|miR-486-3p|miR-5006-5p|miR-6080|miR-665|miR-670-5p|miR-6783-3p|miR-6819-3p|miR-6822-3p|miR-6840-3p|miR-6877-3p|miR-8057	EZH2	-0.7	-0.1	0.27	-0.6	0.53	0.57	0.57	0.78	1.9	0.14	0.48	0.92	1.09	6.46	6.43276	6.80171	6.10069	6.53018
A_19_P00810474		(NA)							-0.88	0.11	1.83	-0.99	0.66	0.71	0.71	0.97	1.9	0.13	4.28	1.33	4.03	5.06	4.40047	6.11096	5.23461	4.28583
TMEM200B	transmembrane protein 200B	protein coding	ENSG00000253304	399474			miR-103a-2-5p|miR-1184|miR-1202|miR-1250-3p|miR-1297|miR-1301-3p|miR-134-5p|miR-142-3p|miR-15b-3p|miR-26a-5p|miR-26b-5p|miR-28-5p|miR-3118|miR-3139|miR-3662|miR-3929|miR-3972|miR-4267|miR-4419b|miR-4441|miR-4465|miR-4478|miR-449b-3p|miR-4504|miR-4518|miR-4668-5p|miR-4691-5p|miR-4717-5p|miR-4734|miR-4795-3p|miR-485-5p|miR-5047|miR-5088-5p|miR-539-5p|miR-5681a|miR-5697|miR-6126|miR-6134|miR-634|miR…		0.86	0.56	-1.12	0.3	0.65	0.7	0.7	0.95	1.9	0.96	2.45	0.28	3.36	4.41	5.18912	3.50605	4.3632	4.62889
ACER3	alkaline ceramidase 3	protein coding	ENSG00000078124	55331	00600	GO:0005789|GO:0006665|GO:0008284|GO:0030148|GO:0030173|GO:0030176|GO:0044281|GO:0046512|GO:0070774|GO:0071602	let-7c-3p|miR-105-5p|miR-1205|miR-1283|miR-1290|miR-1297|miR-130a-5p|miR-150-5p|miR-153-5p|miR-16-2-3p|miR-181a-5p|miR-181b-5p|miR-181c-5p|miR-181d-5p|miR-182-5p|miR-187-5p|miR-1910-3p|miR-195-3p|miR-200c-5p|miR-20a-3p|miR-2117|miR-214-3p|miR-217|miR-22-3p|miR-224-3p|miR-23a-3p|miR-23b-3p|miR-23c|miR-26b-3p|miR-2909|miR-298|miR-302f|miR-3115|miR-3129-3p|miR-3148|miR-3150a-3p|miR-3173-3p|miR-3182|…		0.83	-0.57	-0.47	1.4	0.63	0.68	0.68	0.92	1.9	1.03	0.79	2.27	1.65	3.53	3.13745	3.23764	4.0661	3.70836
A_33_P3411325		(NA)							0.97	0.12	-1.12	0.84	0.73	0.79	0.79	1.07	1.9	0.13	2.09	0.94	2.01	4.11	4.53712	3.29169	4.25958	4.41234
PLA2G4E	phospholipase A2, group IVE	protein coding	ENSG00000188089	123745	00564|00565|00590|00591|00592|01100|04010|04014|04072|04270|04370|04611|04664|04666|04724|04726|04730|04750|04912|04913|04921|05231	GO:0005829|GO:0006644|GO:0036149|GO:0036150|GO:0036151|GO:0036152|GO:0044281|GO:0046474	miR-1233-5p|miR-1273h-5p|miR-1285-3p|miR-130a-5p|miR-149-3p|miR-1827|miR-1915-3p|miR-23a-3p|miR-23b-3p|miR-23c|miR-30b-3p|miR-3144-5p|miR-3187-3p|miR-3187-5p|miR-3657|miR-367-5p|miR-3672|miR-3689a-3p|miR-3689b-3p|miR-3689c|miR-378g|miR-4253|miR-4293|miR-4319|miR-4419a|miR-4443|miR-4456|miR-4478|miR-4707-3p|miR-4728-5p|miR-485-5p|miR-5003-3p|miR-513b-5p|miR-516a-3p|miR-516b-3p|miR-5189-5p|miR-5192…		0.72	-0.49	-0.33	1.21	0.55	0.59	0.59	0.81	1.9	1	0.59	2.24	1.76	3.12	2.74297	2.90033	3.62393	3.22907
A_21_P0007249		(NA)							-1.09	0.02	1.48	-1.1	0.82	0.89	0.89	1.21	1.9	0.01	2.57	1.15	2.28	3.3	2.81895	4.27967	3.19293	2.80275
LCMT1-AS1	LCMT1 antisense RNA 1	lincRNA	ENSG00000260448						-0.86	-0.01	-0.45	-0.85	0.65	0.7	0.7	0.96	1.9	0.01	0.7	1.11	2.68	3.29	3.75538	3.31986	2.45657	3.76501
PIEZO2	piezo-type mechanosensitive ion channel component 2	protein coding	ENSG00000154864	63895		GO:0006812|GO:0009612|GO:0050974	miR-1200|miR-129-5p|miR-15a-3p|miR-1910-3p|miR-2115-3p|miR-218-5p|miR-224-5p|miR-2355-5p|miR-2681-3p|miR-2682-5p|miR-298|miR-3143|miR-3148|miR-324-3p|miR-335-3p|miR-340-3p|miR-34b-5p|miR-34c-3p|miR-3658|miR-367-5p|miR-3714|miR-377-5p|miR-3919|miR-421|miR-4251|miR-4290|miR-4324|miR-4330|miR-4418|miR-4448|miR-4456|miR-4495|miR-449c-5p|miR-4533|miR-4659a-3p|miR-4659b-3p|miR-4668-5p|miR-4709-3p|miR-4…		1.07	0.45	0.83	0.63	0.81	0.88	0.88	1.19	1.9	0.53	1.22	0.55	2.86	3.28	2.87412	3.26259	4.33705	2.42854
LINC01478	lincRNA 1478	lincRNA	ENSG00000267337	101927921					0.67	-0.4	-0.08	1.06	0.5	0.54	0.54	0.74	1.9	0.85	0.12	2.11	2.21	6.04	5.61564	5.92977	6.59663	6.01209
LOC100506474	uncharacterized LOC100506474	other ncRNA	ENSG00000225649	100506474					0.95	0.01	-0.47	0.94	0.72	0.78	0.78	1.06	1.9	0.01	0.67	1.11	1.06	3.05	3.05399	2.57318	3.52337	3.04746
Hs.632423		(NA)							-0.72	0.15	0.78	-0.87	0.55	0.59	0.59	0.8	1.9	0.22	1.89	1.44	1.49	3.02	2.90415	3.53382	2.81341	2.75869
DAPK1-IT1	DAPK1 intronic transcript 1	lncRNA	ENSG00000236709						-1.46	0.21	1.29	-1.67	1.1	1.19	1.19	1.63	1.9	0.14	1.45	1.35	1.26	2.99	2.84107	3.92737	2.46678	2.63383
LINC01268	lincRNA 1268	lincRNA	ENSG00000227502	285758					-0.66	-0.33	0.92	-0.34	0.5	0.54	0.54	0.74	1.9	0.66	2.62	0.46	3.22	2.92	2.36437	3.60908	2.94499	2.69282
Hs.660492		(NA)							-0.75	0.15	0.99	-0.9	0.57	0.61	0.61	0.83	1.9	0.21	2.47	1.44	1.97	2.88	2.65861	3.50223	2.75217	2.51275
MAS1L	MAS1 proto-oncogene like, G protein-coupled receptor	protein coding	ENSG00000228377	116511		GO:0005654|GO:0005737|GO:0005886			0.91	-0.2	-0.56	1.11	0.69	0.75	0.75	1.02	1.9	0.24	0.88	1.47	1.11	2.64	2.55171	2.19105	3.10534	2.75129
A_21_P0012870		(NA)							0.89	-0.22	-0.62	1.11	0.68	0.73	0.73	0.99	1.9	0.27	1.04	1.52	1.12	2.59	2.51571	2.11698	3.01173	2.73399
A_21_P0006190		(NA)							0.84	-0.27	-0.36	1.11	0.63	0.68	0.68	0.93	1.9	0.39	0.54	1.65	1.29	2.56	2.32813	2.24534	3.08548	2.60071
A_22_P00022257		(NA)							0.87	-0.35	-0.21	1.22	0.66	0.71	0.71	0.97	1.9	0.51	0.27	1.79	1.64	2.51	2.13231	2.27539	3.14623	2.4857
HEPACAM2	HEPACAM family member 2	protein coding	ENSG00000188175	253012		GO:0005515|GO:0005794|GO:0005813|GO:0005819|GO:0030496|GO:0051297	let-7c-3p|miR-3124-3p|miR-3180-5p|miR-3606-5p|miR-3613-5p|miR-367-5p|miR-3692-3p|miR-371b-5p|miR-373-5p|miR-4255|miR-4280|miR-4474-5p|miR-4524b-3p|miR-4728-3p|miR-485-3p|miR-494-3p|miR-5087|miR-510-3p|miR-539-3p|miR-548e-5p|miR-548p|miR-616-5p|miR-6793-3p|miR-6837-3p|miR-758-3p|miR-8087|miR-93-3p		1.03	0.05	-0.25	0.98	0.78	0.84	0.84	1.15	1.9	0.05	0.27	1.05	1.17	2.43	2.32672	2.02453	3.05521	2.27652
A_21_P0014680		(NA)							0.85	-0.24	-0.42	1.09	0.65	0.7	0.7	0.95	1.9	0.32	0.66	1.58	1.19	2.43	2.24603	2.06579	2.92033	2.48631
LINC00051	lincRNA 51	asRNA	ENSG00000254008	619434					0.83	-0.03	-0.38	0.86	0.63	0.68	0.68	0.92	1.9	0.03	0.6	1.18	1.07	2.32	2.27838	1.92818	2.75471	2.30842
OVOL1-AS1	OVOL1 antisense RNA 1	asRNA	ENSG00000255120	101927828					0.73	0.81	0.28	-0.08	0.55	0.59	0.59	0.81	1.9	1.99	0.49	0.08	2.15	2.27	2.52414	1.99693	2.72362	1.7128
KDELR3	KDEL (Lys-Asp-Glu-Leu) endoplasmic reticulum protein retention receptor 3	protein coding	ENSG00000100196	11015	05110	GO:0005789|GO:0030968|GO:0036498|GO:0044267	miR-3691-5p	PSCD1	0.7	-0.11	0.39	0.81	0.53	0.57	0.57	0.78	1.89	0.17	0.79	1.38	3.08	9.97	9.49004	9.99723	10.6926	9.60326
SAR1B	secretion associated, Ras related GTPase 1B	protein coding	ENSG00000152700	51128	04141|05134	GO:0002474|GO:0003924|GO:0005789|GO:0005829|GO:0006888|GO:0012507|GO:0018279|GO:0019886|GO:0043687|GO:0044267|GO:0044281|GO:0048208|GO:0061024	miR-106a-5p|miR-106b-5p|miR-125a-3p|miR-1271-3p|miR-1272|miR-1273h-5p|miR-1282|miR-1285-3p|miR-130a-3p|miR-130b-3p|miR-155-5p|miR-17-5p|miR-181b-2-3p|miR-181b-3p|miR-1827|miR-18a-3p|miR-208a-5p|miR-208b-5p|miR-20a-5p|miR-20b-5p|miR-26a-1-3p|miR-26a-2-3p|miR-301a-3p|miR-301b-3p|miR-302a-3p|miR-302b-3p|miR-302c-3p|miR-302d-3p|miR-302e|miR-30b-3p|miR-3119|miR-3168|miR-3187-5p|miR-3607-3p|miR-3613-3p…	ANAPC5|C16orf63|IGHMBP2|KLC1|MRPL44|NLRP1|STAU2	0.73	0.34	-0.05	0.39	0.55	0.6	0.6	0.81	1.89	0.61	0.07	0.48	1.29	8.34	8.42668	8.03399	8.76139	8.08506
SSPN	sarcospan	protein coding	ENSG00000123096	8082		GO:0006936|GO:0007155|GO:0030133	miR-105-5p|miR-10a-5p|miR-10b-5p|miR-1236-3p|miR-124-5p|miR-1243|miR-1261|miR-1304-3p|miR-154-3p|miR-15a-3p|miR-185-3p|miR-190a-3p|miR-2053|miR-20a-3p|miR-21-3p|miR-218-5p|miR-2276-3p|miR-302c-5p|miR-3124-3p|miR-3140-5p|miR-3159|miR-3164|miR-3173-3p|miR-3179|miR-323a-5p|miR-330-3p|miR-33a-3p|miR-3591-3p|miR-3653-5p|miR-3654|miR-3662|miR-3667-3p|miR-367-5p|miR-3670|miR-3691-3p|miR-371a-5p|miR-378a…	ANK3|IGFBP5|KLHDC1|NUP50|PRRX1|RCOR3|TFDP1|ZC3H6|ZMYND11|ZNF415	0.92	-0.28	-0.57	1.2	0.7	0.76	0.76	1.03	1.89	0.35	0.88	1.61	1.15	7.49	7.33781	7.05161	7.97321	7.61842
Hs.592473		(NA)							-1.16	0	2.35	-1.16	0.88	0.95	0.95	1.3	1.89	0	4.13	1.12	4.04	4.23	3.28742	5.64029	4.47713	3.2857
A_21_P0012252		(NA)							1.01	0.2	0.06	0.81	0.77	0.83	0.83	1.13	1.89	0.22	0.05	0.83	1.45	4.23	4.0793	3.93068	4.94243	3.87506
A_33_P3327250		(NA)							-1.34	0.23	2.3	-1.57	1.01	1.1	1.1	1.49	1.89	0.18	3.42	1.39	2.98	4.07	3.3691	5.43919	4.10169	3.13649
Hs.676463		(NA)							-1.29	-0.17	3.11	-1.12	0.98	1.06	1.06	1.44	1.89	0.14	4.97	0.92	5.25	4.05	2.60817	5.89042	4.59967	2.78231
A_21_P0014541		(NA)							-1.15	-0.15	2.15	-1.01	0.87	0.94	0.94	1.29	1.89	0.13	3.76	0.93	3.82	3.9	2.95887	5.25485	4.10033	3.10466
A_21_P0012259		(NA)							0.88	-0.01	-0.19	0.9	0.67	0.72	0.72	0.99	1.89	0.01	0.23	1.14	1.22	2.59	2.44452	2.26984	3.15304	2.45679
Hs.719775		(NA)							0.94	0.35	-0.19	0.59	0.71	0.77	0.77	1.05	1.89	0.45	0.21	0.6	1.19	2.44	2.54645	2.0072	2.94886	2.19628
A_21_P0013126		(NA)							0.69	-0.14	-0.6	0.83	0.52	0.56	0.56	0.77	1.89	0.22	1.43	1.44	1.22	2.35	2.38242	1.92151	2.60689	2.52328
NFKBIA	nuclear factor of kappa light polypeptide gene enhancer in B-cells inhibitor, alpha	protein coding	ENSG00000100906	4792	04024|04062|04064|04210|04380|04620|04621|04622|04623|04660|04662|04668|04722|04920|04931|05120|05131|05134|05140|05142|05145|05160|05161|05162|05164|05166|05168|05169|05200|05203|05215|05220|05222	GO:0002223|GO:0002224|GO:0002755|GO:0002756|GO:0005515|GO:0005634|GO:0005737|GO:0005829|GO:0005886|GO:0006915|GO:0007253|GO:0008134|GO:0008139|GO:0010745|GO:0010875|GO:0010888|GO:0019899|GO:0031625|GO:0032088|GO:0032270|GO:0032481|GO:0033256|GO:0034134|GO:0034138|GO:0034142|GO:0034146|GO:0034162|GO:0034166|GO:0035666|GO:0038095|GO:0038123|GO:0038124|GO:0042802|GO:0042994|GO:0043066|GO:0045087|GO:…	let-7c-3p|miR-143-5p|miR-300|miR-3065-5p|miR-381-3p|miR-4640-5p|miR-4687-3p|miR-4726-5p|miR-4752|miR-4755-3p|miR-548c-3p|miR-548e-5p|miR-5692a|miR-624-5p|miR-6499-3p|miR-6771-3p|miR-6882-5p		-0.9	-0.58	-0.94	-0.32	0.68	0.74	0.74	1.01	1.88	0.93	1.82	0.29	3.32	9.78	10.0963	9.73067	8.83386	10.6746
A_33_P3324890		(NA)							0.67	0.33	0.19	0.34	0.51	0.55	0.55	0.75	1.88	0.66	0.32	0.45	1.7	9.33	9.29287	9.14988	9.81963	8.9599
JMY	junction mediating and regulatory protein, p53 cofactor	protein coding	ENSG00000152409	133746		GO:0003713|GO:0005515|GO:0005634|GO:0006357|GO:0007050|GO:0031252|GO:0034314|GO:0043065|GO:0051091|GO:0070060|GO:0070358	let-7c-3p|miR-1183|miR-1197|miR-1243|miR-1250-3p|miR-1265|miR-1276|miR-129-1-3p|miR-129-2-3p|miR-1295b-5p|miR-130a-3p|miR-130b-3p|miR-134-5p|miR-137|miR-148a-3p|miR-148b-3p|miR-152-3p|miR-181a-5p|miR-181b-5p|miR-181c-5p|miR-181d-5p|miR-1912|miR-193a-3p|miR-193b-3p|miR-196a-3p|miR-2052|miR-218-5p|miR-221-3p|miR-222-3p|miR-224-3p|miR-23a-5p|miR-23b-5p|miR-25-3p|miR-29a-3p|miR-29a-5p|miR-29b-3p|miR-…		-1.37	-0.62	-0.15	-0.75	1.05	1.13	1.13	1.54	1.88	0.58	0.11	0.5	1.45	5.38	5.37572	5.84322	4.47084	5.99667
DYRK1B	dual-specificity tyrosine-(Y)-phosphorylation regulated kinase 1B	protein coding	ENSG00000105204	9149		GO:0003713|GO:0004672|GO:0005515|GO:0006468|GO:0045893|GO:0060612	miR-1296-3p|miR-135a-5p|miR-135b-5p|miR-143-3p|miR-149-3p|miR-150-3p|miR-15a-5p|miR-15b-5p|miR-16-5p|miR-185-5p|miR-1913|miR-1915-3p|miR-195-5p|miR-2392|miR-296-5p|miR-3121-3p|miR-3162-3p|miR-3175|miR-3184-5p|miR-324-3p|miR-361-3p|miR-3918|miR-423-5p|miR-424-5p|miR-4306|miR-4644|miR-4716-3p|miR-4723-5p|miR-4728-5p|miR-4753-5p|miR-4770|miR-497-5p|miR-5589-5p|miR-5698|miR-6088|miR-637|miR-6731-5p|m…		-1.15	0.23	0.22	-1.38	0.87	0.94	0.94	1.28	1.88	0.22	0.21	1.43	1.41	4.88	5.24041	5.23023	4.08424	5.00717
ZBTB7B	zinc finger and BTB domain containing 7B	protein coding	ENSG00000160685	51043		GO:0005515|GO:0005634|GO:0005654|GO:0007398	let-7a-2-3p|let-7g-3p|miR-1180-5p|miR-1273h-5p|miR-1275|miR-1277-5p|miR-1321|miR-1343-5p|miR-2278|miR-3153|miR-3195|miR-3202|miR-4258|miR-4286|miR-4447|miR-4453|miR-4472|miR-4492|miR-4516|miR-4532|miR-4538|miR-4651|miR-4721|miR-4723-5p|miR-4731-5p|miR-4739|miR-4756-5p|miR-4789-5p|miR-5090|miR-5698|miR-608|miR-6760-5p|miR-6795-5p|miR-6802-3p|miR-6825-5p|miR-6870-5p|miR-6887-5p|miR-7106-5p|miR-7111…	ADARB1|MBD6|PWWP2B|UBTF|ZNF771	0.99	0.27	-0.7	0.71	0.75	0.81	0.81	1.1	1.88	0.31	1.07	0.72	1.37	4.26	4.57099	3.59745	4.58366	4.29721
A_33_P3223111		(NA)							1.06	0.27	0.76	0.79	0.81	0.87	0.87	1.19	1.88	0.28	1.08	0.75	2.86	4.14	3.64222	4.13784	5.19894	3.37453
OLFM1	olfactomedin 1	protein coding	ENSG00000130558	10439		GO:0003190|GO:0005515|GO:0005615|GO:0005623|GO:0005783|GO:0007399|GO:0010628|GO:0010629|GO:0010718|GO:0023041|GO:0030424|GO:0030516|GO:0043025|GO:0044295|GO:0060317	miR-1243|miR-141-3p|miR-181c-3p|miR-194-3p|miR-200a-3p|miR-3529-3p|miR-4296|miR-4305|miR-4436b-5p|miR-4521|miR-4709-5p|miR-4710|miR-4724-5p|miR-5197-3p|miR-520d-5p|miR-524-5p|miR-6818-3p|miR-6878-5p|miR-8075		1.58	1.47	-0.75	0.12	1.21	1.3	1.3	1.78	1.88	1.53	0.62	0.05	2.14	3.94	4.9972	2.77487	4.35791	3.52979
A_21_P0004507		(NA)							-0.86	0.3	0.53	-1.15	0.65	0.7	0.7	0.96	1.88	0.41	0.88	1.67	1.17	2.95	3.1167	3.34559	2.48993	2.82003
FOLR2	folate receptor 2 (fetal)	protein coding	ENSG00000165457	2350	04144	GO:0005542|GO:0006898|GO:0008144|GO:0008284|GO:0008517|GO:0009986|GO:0015884|GO:0016020|GO:0031362|GO:0050758|GO:0051870|GO:0061714|GO:0071231	miR-4736|miR-542-3p|miR-6776-5p|miR-874-5p	ADARB1|BRD4|DDX51|EPAS1|MBD6|MYCN|NARG1|PWWP2B|SARDH|SCT|TCF15|TRIM5|TTC28|ZNF286A|ZNF423|ZNF771	-0.7	0.56	0.81	-1.26	0.53	0.58	0.58	0.79	1.88	1.25	2.05	2.44	1.64	3.69	3.85712	4.10654	3.40532	3.29652
LRRC38	leucine rich repeat containing 38	protein coding	ENSG00000162494	126755			miR-1227-5p|miR-1273h-5p|miR-1275|miR-1306-5p|miR-1343-3p|miR-214-3p|miR-25-3p|miR-30b-3p|miR-3135b|miR-3194-3p|miR-32-5p|miR-3619-5p|miR-363-3p|miR-3667-3p|miR-367-3p|miR-3689a-3p|miR-3689b-3p|miR-3689c|miR-3921|miR-4293|miR-4306|miR-432-5p|miR-4443|miR-4454|miR-4530|miR-4653-5p|miR-4713-5p|miR-485-5p|miR-5192|miR-558|miR-6071|miR-629-3p|miR-637|miR-6762-5p|miR-6779-5p|miR-6780a-5p|miR-6783-3p|m…	ZNF808	1.05	0.04	-0.04	1.01	0.8	0.86	0.86	1.18	1.88	0.04	0.03	1.06	1.42	2.7	2.46495	2.38757	3.43691	2.4242
C19orf80	chromosome 19 open reading frame 80	protein coding	ENSG00000130173	55908		GO:0005179|GO:0005515|GO:0005576|GO:0010954|GO:0019216|GO:0044255|GO:0044342|GO:0050746|GO:0070328	miR-1227-5p|miR-4455|miR-6728-3p|miR-6747-5p		-0.81	-0.58	-0.05	-0.23	0.62	0.66	0.66	0.91	1.88	1.08	0.05	0.22	1.52	2.67	2.49068	3.02126	2.21287	3.06864
DLGAP1	discs, large (Drosophila) homolog-associated protein 1	protein coding	ENSG00000170579	9229	04724	GO:0005515	miR-1179|miR-1207-5p|miR-1237-5p|miR-127-5p|miR-1273f|miR-145-5p|miR-146a-5p|miR-146b-3p|miR-146b-5p|miR-17-3p|miR-1827|miR-188-5p|miR-190a-5p|miR-204-5p|miR-21-3p|miR-211-5p|miR-29b-2-5p|miR-3133|miR-328-5p|miR-345-3p|miR-3591-3p|miR-3646|miR-3656|miR-379-3p|miR-3928-5p|miR-411-3p|miR-4260|miR-4261|miR-4316|miR-4446-5p|miR-4457|miR-4488|miR-4491|miR-4657|miR-4697-5p|miR-4763-3p|miR-4796-3p|miR-4…	DUS2L|E2F4|FOXN3|NLRP1|ST18|STAU2|ZFP28	-1.23	0.2	1.49	-1.43	0.94	1.02	1.02	1.38	1.88	0.16	2.18	1.36	1.75	2.66	2.34088	3.63564	2.40136	2.14197
A_21_P0005436		(NA)							0.71	0.38	0.28	0.33	0.54	0.58	0.58	0.79	1.88	0.73	0.48	0.4	1.87	2.47	2.41112	2.30822	3.0156	2.03015
A_22_P00017665		(NA)							-0.85	-0.44	0.05	-0.41	0.65	0.7	0.7	0.95	1.88	0.7	0.06	0.43	1.32	2.44	2.31298	2.80409	1.95166	2.75367
FSTL3	follistatin-like 3 (secreted glycoprotein)	protein coding	ENSG00000070404	10272		GO:0001968|GO:0002244|GO:0005515|GO:0005576|GO:0005615|GO:0005634|GO:0005654|GO:0006357|GO:0022409|GO:0030514|GO:0032926|GO:0045671|GO:0045944|GO:0048185|GO:0090101	miR-1207-5p|miR-1285-3p|miR-132-5p|miR-1827|miR-185-3p|miR-1909-3p|miR-296-5p|miR-3064-5p|miR-3152-5p|miR-3173-5p|miR-3187-5p|miR-329-3p|miR-362-3p|miR-3942-5p|miR-4316|miR-4441|miR-4447|miR-4483|miR-4492|miR-4498|miR-4640-5p|miR-4649-3p|miR-4688|miR-4703-5p|miR-4707-5p|miR-4710|miR-4713-3p|miR-4763-3p|miR-5001-5p|miR-500b-3p|miR-5189-5p|miR-593-5p|miR-612|miR-6504-5p|miR-6722-3p|miR-6748-5p|miR-…		1.05	-0.1	-1.17	1.15	0.8	0.87	0.87	1.18	1.87	0.09	1.96	1.25	1.62	9.14	9.41925	8.3435	9.39189	9.51747
SNORA11D	small nucleolar RNA, H/ACA box 11D	other ncRNA	ENSG00000221475	100124541					-1.11	-1.02	0.61	-0.1	0.85	0.92	0.92	1.25	1.87	1.49	0.74	0.06	2.21	7.58	6.80361	8.42877	7.31553	7.82104
EIF2S1	eukaryotic translation initiation factor 2, subunit 1 alpha, 35kDa	protein coding	ENSG00000134001	1965	03013|04141|04932|05160|05162|05164|05168	GO:0002230|GO:0003743|GO:0005515|GO:0005829|GO:0005844|GO:0006412|GO:0006413|GO:0010467|GO:0010494|GO:0016020|GO:0030968|GO:0032057|GO:0034198|GO:0034644|GO:0034976|GO:0036499|GO:0043022|GO:0044267|GO:0044822|GO:0055085|GO:0070062|GO:0098779|GO:0098792	miR-1178-5p|miR-1182|miR-1273e|miR-1297|miR-1324|miR-140-5p|miR-193a-5p|miR-200b-3p|miR-200c-3p|miR-205-5p|miR-210-5p|miR-2117|miR-22-5p|miR-302e|miR-30a-3p|miR-30d-3p|miR-30e-3p|miR-3126-3p|miR-3133|miR-3140-5p|miR-3167|miR-3191-5p|miR-3671|miR-3681-5p|miR-3688-3p|miR-372-5p|miR-3913-3p|miR-3942-5p|miR-421|miR-4255|miR-4261|miR-4266|miR-4276|miR-4282|miR-4287|miR-429|miR-4308|miR-4310|miR-4504|m…	HEATR1|HNRPAB|ISG20L2|PFDN2|PNO1|PSMD12|RBM8A|SUGT1|SYNCRIP|THOC4|UTP18|WDSOF1|ZRF1	0.77	-0.04	-0.8	0.81	0.59	0.64	0.64	0.87	1.87	0.04	1.78	1.18	1.52	7.34	7.53009	6.76864	7.53745	7.56766
PLAG1	pleiomorphic adenoma gene 1	protein coding	ENSG00000181690	5324		GO:0000978|GO:0001077|GO:0003700|GO:0006366|GO:0045944	let-7a-3p|let-7b-3p|let-7f-1-3p|miR-1208|miR-126-5p|miR-1262|miR-1264|miR-1277-5p|miR-1283|miR-1290|miR-1296-5p|miR-141-5p|miR-150-5p|miR-15a-5p|miR-15b-5p|miR-16-5p|miR-190a-3p|miR-195-5p|miR-21-5p|miR-216b-3p|miR-223-5p|miR-224-3p|miR-224-5p|miR-27a-3p|miR-27b-3p|miR-302a-3p|miR-302b-3p|miR-302c-3p|miR-302d-3p|miR-302e|miR-31-5p|miR-3120-3p|miR-3124-3p|miR-3138|miR-3143|miR-3148|miR-3153|miR-31…		-1.26	-0.77	-0.11	-0.49	0.97	1.04	1.04	1.42	1.87	0.87	0.08	0.32	1.46	6.88	6.70783	7.37073	6.10779	7.48038
HSBP1L1	heat shock factor binding protein 1-like 1	protein coding	ENSG00000226742	440498			miR-1293|miR-3182|miR-4483|miR-4761-5p		-1.13	0.01	-1.27	-1.14	0.86	0.93	0.93	1.27	1.87	0.01	1.98	1.13	4.3	4.75	5.7406	4.4589	3.33196	5.72855
A_33_P3325808		(NA)							0.85	0.47	-0.3	0.38	0.65	0.7	0.7	0.96	1.87	0.75	0.41	0.39	1.34	4.61	4.88822	4.12333	4.97588	4.42022
TRIP13	thyroid hormone receptor interactor 13	protein coding					miR-1266-5p|miR-2115-5p|miR-3156-5p|miR-4258|miR-4491|miR-4518|miR-4657|miR-603|miR-6833-5p	ANLN|ATAD2|ATAD3A|BOP1|BRCA1|BUB3|CCNA2|CCNB1|CCNB2|CCNF|CDC20|CDC6|CENPA|CPSF6|DTL|E2F1|ECT2|EEF1E1|EXO1|FOXD1|FOXM1|H2AFZ|HEATR1|HELLS|HMG4L|HMGA1|HMGB3|ILF3|KPNA2|MCM2|MCM4|MCM5|MCM6|MCM7|MRPS12|MYBL2|NOLC1|NUP37|ORC1L|PA2G4|POLQ|PWP1|RAD54L|RAE1|RECQL4|RFC2|RFC4|RFC5|RNASEH2A|RUVBL1|SF3B3|SMARCC1|SNRPB2|SYNCRIP|TCF19|TEX10|TMEM68|UHRF1|WDSOF1|WHSC1|XRCC5|ZBED4	1.02	0.37	-0.84	0.66	0.78	0.84	0.84	1.15	1.87	0.43	1.3	0.61	1.65	4.46	4.89988	3.69269	4.71378	4.5343
CTSLP2	cathepsin L pseudogene 2	pseudogene	ENSG00000280913	1517					0.79	-0.52	-1.33	1.31	0.6	0.65	0.65	0.89	1.87	0.95	3.29	2.19	2.4	8.2	8.31585	7.50916	8.29941	8.83595
ENSG00000257298		lncRNA	ENSG00000257298						-1.2	-0.43	1.6	-0.78	0.92	0.99	0.99	1.35	1.87	0.42	2.46	0.62	2.77	3.84	2.99465	5.02234	3.81906	3.42023
RGSL1	regulator of G-protein signaling like 1	protein coding	ENSG00000121446	353299			miR-1587|miR-301a-5p|miR-301b-5p|miR-335-3p|miR-340-5p|miR-3620-5p|miR-378g|miR-425-5p|miR-4266|miR-4271|miR-4443|miR-4667-5p|miR-4675|miR-4698|miR-4700-5p|miR-4725-3p|miR-4741|miR-4743-3p|miR-4757-5p|miR-668-3p|miR-6744-3p|miR-6780b-5p|miR-6815-3p|miR-6817-3p|miR-8089		0.92	0.33	-0.16	0.59	0.7	0.76	0.76	1.04	1.87	0.43	0.18	0.61	1.18	3.13	3.20846	2.71602	3.63765	2.8802
Hs.271249		(NA)							-1.05	-0.18	0.8	-0.87	0.8	0.87	0.87	1.18	1.87	0.18	1.16	0.86	1.31	3.07	2.78615	3.76824	2.71685	2.96856
A_33_P3310754		(NA)							-0.63	0.48	0.62	-1.1	0.48	0.52	0.52	0.71	1.87	1.16	1.66	2.36	1.52	2.3	2.48411	2.62811	2.00169	2.00739
A_22_P00010170		(NA)							-0.96	0.02	0.51	-0.98	0.73	0.79	0.79	1.08	1.87	0.02	0.73	1.15	1.04	2.82	2.822	3.31097	2.35213	2.79729
Hs.511912		(NA)							-0.79	0.06	0.38	-0.85	0.61	0.66	0.66	0.89	1.87	0.07	0.63	1.22	1.05	2.68	2.73098	3.0544	2.26145	2.67409
STX17-AS1	STX17 antisense RNA 1	asRNA	ENSG00000255145	441461					-0.8	0.62	0.55	-1.42	0.61	0.66	0.66	0.9	1.87	1.18	1.01	2.39	1.65	2.51	2.88417	2.81448	2.01047	2.26534
DMBT1	deleted in malignant brain tumors 1	protein coding	ENSG00000187908	1755	04970	GO:0002221|GO:0005044|GO:0005515|GO:0005576|GO:0005615|GO:0005737|GO:0006898|GO:0008329|GO:0019898|GO:0030670|GO:0030855|GO:0035375|GO:0042589|GO:0043152|GO:0044267|GO:0045087|GO:0048306|GO:0070062	miR-1275|miR-3944-5p|miR-4314|miR-4639-5p|miR-5088-5p|miR-571|miR-6892-3p		-1.08	-0.05	1.04	-1.02	0.82	0.89	0.89	1.21	1.87	0.04	1.61	1.04	1.48	2.62	2.31988	3.40858	2.33292	2.37163
A_21_P0002050		(NA)							1.05	-0.05	-0.26	1.1	0.81	0.87	0.87	1.19	1.87	0.04	0.27	1.18	1.19	2.51	2.32904	2.12014	3.17328	2.38009
SLC35B1	solute carrier family 35, member B1	protein coding	ENSG00000121073	10237		GO:0005459|GO:0006810|GO:0043231|GO:0072334	miR-1208|miR-28-5p|miR-3139|miR-4253|miR-4264|miR-4267|miR-4463|miR-4668-3p|miR-4685-5p|miR-6776-3p|miR-6822-3p|miR-6837-5p|miR-6862-5p|miR-708-5p|miR-7109-3p|miR-7847-3p		0.72	0.24	-0.53	0.48	0.55	0.59	0.59	0.81	1.86	0.38	1.1	0.64	1.44	8.68	8.942	8.18128	8.89755	8.70666
SIPA1L3	signal-induced proliferation-associated 1 like 3	protein coding	ENSG00000105738	23094	04015	GO:0001654|GO:0001725|GO:0003382|GO:0005615|GO:0007010|GO:0045177|GO:0061689|GO:0090162	miR-1252-5p|miR-1273h-5p|miR-1275|miR-1277-5p|miR-149-3p|miR-186-5p|miR-1909-3p|miR-190a-3p|miR-2110|miR-302e|miR-30b-3p|miR-3148|miR-3150b-3p|miR-3179|miR-3689a-3p|miR-3689b-3p|miR-3689c|miR-370-3p|miR-372-5p|miR-4254|miR-4271|miR-4306|miR-4318|miR-4426|miR-4446-3p|miR-4447|miR-4472|miR-4492|miR-4498|miR-4524b-3p|miR-4665-5p|miR-4668-3p|miR-4668-5p|miR-4721|miR-4723-5p|miR-4725-3p|miR-4728-5p|mi…	ADARB1|BRD4|MBD6|PWWP2B|ZNF423|ZNF771	0.89	-1.02	-0.18	1.91	0.68	0.74	0.74	1	1.86	2.03	0.22	3.04	3.2	4.44	3.5506	4.38948	5.27964	4.57425
C14orf159	chromosome 14 open reading frame 159	protein coding	ENSG00000133943	80017		GO:0005515	miR-1178-3p|miR-1275|miR-194-5p|miR-199a-5p|miR-199b-5p|miR-335-3p|miR-3605-5p|miR-5007-5p|miR-539-5p|miR-548au-3p|miR-5582-3p|miR-661|miR-6825-5p|miR-6828-3p|miR-7153-3p	ECT2|MIER1|ZMYND8	-0.64	-0.34	-0.01	-0.31	0.49	0.53	0.53	0.73	1.86	0.7	0.02	0.41	1.35	7.62	7.55251	7.87646	7.23276	7.89021
QDPR	quinoid dihydropteridine reductase	protein coding	ENSG00000151552	5860	00790|01100	GO:0004155|GO:0005737|GO:0005829|GO:0006520|GO:0006559|GO:0009055|GO:0034641|GO:0044281|GO:0051066|GO:0070062	miR-105-5p|miR-3065-5p|miR-3652|miR-4251|miR-4430|miR-4704-3p|miR-4717-5p|miR-4797-5p|miR-4798-3p|miR-4999-5p|miR-548au-3p|miR-561-5p|miR-5700|miR-576-3p|miR-653-5p|miR-6760-3p|miR-6868-5p|miR-6885-3p|miR-7159-5p|miR-7853-5p|miR-95-3p		-1.16	-0.42	-0.73	-0.74	0.9	0.97	0.97	1.32	1.86	0.43	0.88	0.6	2.45	7.48	7.8666	7.56515	6.40087	8.29053
A_19_P00800555		(NA)							-1.19	0.24	2.19	-1.43	0.91	0.98	0.98	1.34	1.86	0.22	3.66	1.42	3.21	6.92	6.24867	8.19156	7.00604	6.00555
TET1	tet methylcytosine dioxygenase 1	protein coding	ENSG00000138336	80312		GO:0001826|GO:0005506|GO:0005634|GO:0006493|GO:0008284|GO:0010467|GO:0019827|GO:0031062|GO:0035511|GO:0040029|GO:0043566|GO:0045944|GO:0070579|GO:0080111|GO:0090310	miR-106a-5p|miR-106b-5p|miR-1179|miR-1193|miR-1233-5p|miR-124-3p|miR-1246|miR-1250-3p|miR-1252-3p|miR-1262|miR-1276|miR-1277-5p|miR-129-5p|miR-1297|miR-1303|miR-141-3p|miR-142-5p|miR-143-3p|miR-16-1-3p|miR-17-3p|miR-17-5p|miR-183-3p|miR-183-5p|miR-188-3p|miR-190a-3p|miR-191-5p|miR-19a-5p|miR-19b-1-5p|miR-19b-2-5p|miR-200a-3p|miR-203a-3p|miR-208a-5p|miR-208b-5p|miR-20a-5p|miR-20b-5p|miR-2115-3p|mi…		-1.47	0.19	0.14	-1.66	1.12	1.21	1.21	1.66	1.86	0.13	0.09	1.31	1.47	6.3	6.75786	6.70439	5.2372	6.56321
A_21_P0013784		(NA)							-0.82	-0.54	0.41	-0.27	0.63	0.68	0.68	0.92	1.86	0.96	0.66	0.27	1.65	5.76	5.35719	6.3107	5.49431	5.89902
C11orf71	chromosome 11 open reading frame 71	protein coding	ENSG00000180425	54494			miR-129-5p|miR-369-3p|miR-5692a|miR-5692b|miR-5692c|miR-5694		-1.06	0.45	-1.09	-1.51	0.81	0.88	0.88	1.2	1.86	0.54	1.75	1.79	4.72	5.69	6.88681	5.338	4.27901	6.43242
ELK4	ELK4, ETS-domain protein (SRF accessory protein 1)	protein coding	ENSG00000158711	2005	04010|05166|05202	GO:0000122|GO:0001047|GO:0003677|GO:0003682|GO:0003712|GO:0005515|GO:0005654|GO:0005737|GO:0070932	miR-1226-3p|miR-143-3p|miR-153-5p|miR-3121-3p|miR-3145-5p|miR-338-3p|miR-3658|miR-3664-3p|miR-4266|miR-4282|miR-4482-3p|miR-4770|miR-4802-3p|miR-548aa|miR-548ao-3p|miR-548ap-3p|miR-548c-3p|miR-548t-3p|miR-551b-5p|miR-5584-3p|miR-597-3p|miR-6088|miR-6751-5p|miR-6803-5p|miR-6835-5p|miR-6847-5p|miR-7159-3p|miR-766-5p|miR-8068		0.76	-0.38	-0.26	1.13	0.58	0.63	0.63	0.85	1.86	0.65	0.41	1.9	1.57	5.43	5.09302	5.20394	5.96017	5.46839
A_21_P0014699		(NA)							-1.33	-0.58	1.04	-0.76	1.02	1.11	1.11	1.51	1.86	0.54	1.19	0.52	1.67	4.36	3.74214	5.35521	4.02156	4.31947
ENSG00000261043		lincRNA	ENSG00000261043						1.15	0.6	-1.11	0.55	0.88	0.95	0.95	1.29	1.86	0.7	1.62	0.41	2.22	4.2	4.93086	3.21625	4.36286	4.331
A_21_P0013225		(NA)							1.09	0.25	-0.19	0.84	0.84	0.9	0.9	1.23	1.86	0.25	0.17	0.78	1.15	3.74	3.7296	3.29517	4.3846	3.48025
A_33_P3372251		(NA)							-0.9	-0.06	0.77	-0.85	0.7	0.75	0.75	1.02	1.86	0.06	1.33	1	1.3	3.68	3.46884	4.29311	3.38883	3.5277
Hs.612901		(NA)							-1.21	-0.03	1.2	-1.18	0.93	1	1	1.37	1.86	0.02	1.67	1.07	1.5	2.87	2.53456	3.76436	2.55649	2.56154
ENSG00000236544		lincRNA	ENSG00000236544						-0.93	-0.64	0.17	-0.29	0.72	0.77	0.77	1.05	1.86	1	0.19	0.25	1.44	2.69	2.37778	3.1862	2.25225	3.01766
LOC101927905	uncharacterized LOC101927905	lncRNA							-0.71	-0.05	0.52	-0.66	0.55	0.59	0.59	0.8	1.86	0.07	1.1	1	1.18	2.61	2.48111	3.05439	2.34367	2.53233
SAMD12	sterile alpha motif domain containing 12	protein coding	ENSG00000177570	401474			miR-106a-5p|miR-106b-5p|miR-1271-3p|miR-1271-5p|miR-1273g-5p|miR-1273h-3p|miR-1297|miR-1303|miR-17-5p|miR-190a-3p|miR-20a-5p|miR-20b-5p|miR-302e|miR-3136-5p|miR-323a-3p|miR-331-3p|miR-33b-3p|miR-346|miR-3612|miR-3614-5p|miR-4261|miR-4291|miR-4317|miR-4328|miR-4439|miR-4443|miR-4463|miR-4496|miR-4527|miR-4659a-5p|miR-4659b-5p|miR-4667-5p|miR-4685-5p|miR-4700-5p|miR-4715-5p|miR-4720-3p|miR-4728-3p|…		-0.89	-0.13	1.26	-0.76	0.69	0.74	0.74	1.01	1.86	0.15	2.63	0.88	2.59	2.58	2.05171	3.44334	2.55073	2.18609
ENSG00000253189		lincRNA	ENSG00000253189						-0.74	-0.47	0.15	-0.27	0.57	0.62	0.62	0.84	1.86	0.9	0.2	0.3	1.37	2.54	2.31416	2.92806	2.18453	2.78275
Hs.683780		(NA)							-1.04	-0.48	0.62	-0.57	0.8	0.87	0.87	1.18	1.86	0.59	0.82	0.49	1.44	2.47	2.06892	3.16568	2.12085	2.54777
A_22_P00001699		(NA)							-0.71	-0.05	0.89	-0.66	0.55	0.59	0.59	0.8	1.86	0.06	2.25	1	2.07	2.42	2.1039	3.03934	2.32736	2.15304
A_21_P0001201		(NA)							-0.96	0.28	1.15	-1.24	0.73	0.79	0.79	1.08	1.86	0.33	2.14	1.56	1.61	2.37	2.21689	3.08617	2.12848	1.9394
CXCR2P1	chemokine (C-X-C motif) receptor 2 pseudogene 1	pseudogene							-0.83	0.14	0.65	-0.96	0.64	0.69	0.69	0.94	1.86	0.17	1.2	1.36	1.13	2.35	2.31961	2.83267	2.00371	2.18398
Hs.580469		(NA)							-0.65	-0.32	0.25	-0.33	0.5	0.54	0.54	0.73	1.86	0.64	0.46	0.45	1.28	2.25	2.06228	2.62566	1.97885	2.37863
PMS2P5	postmeiotic segregation increased 2 pseudogene 5	pseudogene							-0.6	0.12	-0.07	-0.72	0.46	0.5	0.5	0.68	1.85	0.21	0.11	1.41	1.94	6.95	7.23957	7.0517	6.45117	7.11752
Hs.565013		(NA)							-0.89	-0.53	0.18	-0.35	0.68	0.74	0.74	1	1.85	0.84	0.22	0.33	1.34	6.88	6.62372	7.34012	6.45498	7.15628
PDLIM4	PDZ and LIM domain 4	protein coding	ENSG00000131435	8572		GO:0005515	miR-2467-3p|miR-302e|miR-3126-5p|miR-3128|miR-363-5p|miR-3646|miR-3662|miR-4447|miR-4463|miR-4487|miR-4689|miR-4723-5p|miR-490-3p|miR-494-3p|miR-5698|miR-585-5p|miR-608|miR-619-3p|miR-6745|miR-6827-5p|miR-6830-5p|miR-6870-5p|miR-6875-5p|miR-7111-5p|miR-8066|miR-8075	CUGBP1|DDX31	1.45	-0.62	0.06	2.08	1.12	1.21	1.21	1.64	1.85	0.54	0.03	1.78	2.18	5.52	4.64171	5.32215	6.77327	5.26608
Hs.674388		(NA)							0.9	0.25	-1.1	0.65	0.7	0.75	0.75	1.02	1.85	0.31	2.16	0.7	2.32	4.11	4.63578	3.28541	4.18798	4.38312
CCDC176	coiled-coil domain containing 176	protein coding	ENSG00000119636	80127		GO:0036064|GO:0044458	miR-1265|miR-1273h-5p|miR-133a-3p|miR-133b|miR-143-5p|miR-144-5p|miR-15b-3p|miR-1825|miR-197-5p|miR-203a-3p|miR-203a-5p|miR-2355-3p|miR-30b-3p|miR-3121-5p|miR-3125|miR-3132|miR-3201|miR-3612|miR-3646|miR-3686|miR-3689a-3p|miR-3689b-3p|miR-3689c|miR-382-5p|miR-3916|miR-412-3p|miR-4261|miR-4273|miR-4307|miR-4311|miR-4424|miR-4433b-3p|miR-4451|miR-4462|miR-4470|miR-4496|miR-4517|miR-4699-3p|miR-511-…		1.09	-0.52	-0.98	1.62	0.84	0.91	0.91	1.24	1.85	0.62	1.43	1.86	1.25	4.09	3.93063	3.47851	4.57129	4.45496
ZNF19	zinc finger protein 19	protein coding	ENSG00000157429	7567			miR-1273h-3p|miR-30c-1-3p|miR-30c-2-3p|miR-3166|miR-3670|miR-384|miR-4478|miR-4723-5p|miR-5187-3p|miR-526b-5p|miR-548aa|miR-548ap-3p|miR-548q|miR-548t-3p|miR-5698|miR-6788-5p|miR-6803-5p|miR-6870-5p|miR-6878-5p|miR-7110-5p|miR-7111-5p|miR-8485		-0.95	0	-0.32	-0.96	0.73	0.79	0.79	1.08	1.85	0	0.4	1.1	2.19	3.99	4.41834	4.08992	3.13874	4.41424
A_33_P3376873		(NA)							-0.87	-0.46	0.73	-0.41	0.67	0.73	0.73	0.99	1.85	0.7	1.32	0.41	1.94	3.45	2.95234	4.14503	3.27218	3.41142
A_22_P00015781		(NA)							1.05	0.62	0.13	0.43	0.81	0.87	0.87	1.19	1.85	0.81	0.12	0.34	1.45	3.38	3.48531	2.99228	4.04199	2.86707
PPP1R2P9	protein phosphatase 1, regulatory (inhibitor) subunit 2 pseudogene 9	pseudogene						ADARB1|DDX51|EPAS1|LBX1|MBD6|NARG1|POLL|PWWP2B|RGS6|SCT|TTC28|ZCCHC14|ZNF423|ZNF462|ZNF503|ZNF771	-0.78	0.09	0.6	-0.87	0.6	0.65	0.65	0.88	1.85	0.12	1.16	1.28	1.11	2.94	2.89733	3.40018	2.62135	2.80303
ABCA4	ATP-binding cassette, sub-family A (ABC1), member 4	protein coding	ENSG00000198691	24	02010	GO:0001523|GO:0005215|GO:0006810|GO:0007603|GO:0016020|GO:0055085|GO:0097381	miR-1281|miR-29b-2-5p|miR-4268|miR-4443|miR-4792|miR-484|miR-516b-5p|miR-639|miR-6767-5p		-0.81	0.33	0.99	-1.14	0.63	0.68	0.68	0.92	1.85	0.5	2.17	1.74	1.57	2.64	2.57459	3.23239	2.42126	2.245
A_21_P0002162		(NA)							0.85	-0.26	-0.81	1.12	0.66	0.71	0.71	0.97	1.85	0.35	1.56	1.58	1.24	2.62	2.63735	2.08851	2.94031	2.90128
LOC554206	leucine carboxyl methyltransferase 1 pseudogene	pseudogene	ENSG00000262587	554206					-0.91	0.01	0.3	-0.92	0.7	0.75	0.75	1.03	1.85	0.01	0.39	1.12	1.08	2.51	2.60234	2.89197	1.98468	2.58898
ENSG00000263884		lincRNA	ENSG00000263884						0.83	-0.23	-0.54	1.06	0.64	0.69	0.69	0.94	1.85	0.31	0.94	1.52	1.09	2.5	2.39586	2.08157	2.91222	2.62541
A_33_P3424864		(NA)							0.85	-0.26	-0.5	1.11	0.66	0.71	0.71	0.96	1.85	0.35	0.8	1.58	1.12	2.44	2.28466	2.05013	2.90123	2.54623
OCLM	oculomedin	protein coding	ENSG00000262180	10896		GO:0007601	miR-302c-5p|miR-6789-5p		0.64	-0.11	-0.29	0.75	0.49	0.53	0.53	0.73	1.85	0.17	0.58	1.35	1.08	2.31	2.21963	2.03616	2.67645	2.32748
A_21_P0005959		(NA)							0.63	0.32	0.1	0.31	0.48	0.52	0.52	0.71	1.85	0.66	0.17	0.43	1.49	2.23	2.23961	2.02844	2.65363	1.92459
ENSG00000236102		lincRNA	ENSG00000236102						0.6	0.59	0.15	0	0.46	0.5	0.5	0.68	1.85	1.65	0.27	0	1.85	2.21	2.40604	1.96092	2.55702	1.81431
ENSG00000226581		lincRNA	ENSG00000226581						0.62	0.15	-0.22	0.47	0.48	0.52	0.52	0.71	1.85	0.26	0.42	0.75	1.08	2.18	2.23898	1.86623	2.49028	2.08813
A_21_P0011445		(NA)							-0.64	0.19	0.61	-0.83	0.49	0.53	0.53	0.73	1.85	0.33	1.57	1.56	1.25	2.16	2.14249	2.56702	1.92699	1.95377
ANXA10	annexin A10	protein coding	ENSG00000109511	11199		GO:0005515	miR-101-3p|miR-130a-5p|miR-216b-5p|miR-218-2-3p|miR-23a-3p|miR-23b-3p|miR-23c|miR-302f|miR-4662a-3p|miR-504-3p|miR-506-5p|miR-508-3p|miR-5197-3p|miR-6731-3p|miR-6806-5p		2.54	1.75	0.75	0.79	1.97	2.12	2.12	2.9	1.84	1	0.33	0.24	1.68	8.87	9.06869	8.07675	10.6172	7.32267
ELP4	elongator acetyltransferase complex subunit 4	protein coding	ENSG00000109911	26610		GO:0000123|GO:0005515|GO:0005654|GO:0005737|GO:0006325|GO:0006357|GO:0006368|GO:0008023|GO:0008607|GO:0033588|GO:0043966|GO:0043967|GO:0045859	miR-1178-5p|miR-1243|miR-1250-3p|miR-1252-3p|miR-1252-5p|miR-126-5p|miR-190a-3p|miR-219a-2-3p|miR-335-3p|miR-3607-3p|miR-3686|miR-3941|miR-4282|miR-4310|miR-4311|miR-452-5p|miR-4676-3p|miR-4766-3p|miR-5007-3p|miR-548at-5p|miR-548n|miR-561-5p|miR-5696|miR-580-3p|miR-605-5p|miR-606|miR-651-3p|miR-6515-5p|miR-6770-3p|miR-6798-3p|miR-6853-3p|miR-7157-5p|miR-892c-3p		0.57	0.33	-0.53	0.24	0.44	0.48	0.48	0.65	1.84	0.79	1.48	0.36	2.18	7.48	7.84703	6.98802	7.56269	7.51653
NOTCH1	notch 1	protein coding	ENSG00000148400	4851	04320|04330|04919|05020|05206	GO:0000122|GO:0000139|GO:0001047|GO:0001190|GO:0001837|GO:0001947|GO:0002193|GO:0003157|GO:0003160|GO:0003169|GO:0003180|GO:0003181|GO:0003184|GO:0003192|GO:0003198|GO:0003203|GO:0003207|GO:0003208|GO:0003209|GO:0003213|GO:0003214|GO:0003222|GO:0003241|GO:0003256|GO:0003273|GO:0003344|GO:0004857|GO:0005515|GO:0005576|GO:0005634|GO:0005654|GO:0005789|GO:0005829|GO:0005886|GO:0005912|GO:0006355|GO:…	miR-101-3p|miR-1227-5p|miR-1263|miR-153-5p|miR-18a-3p|miR-1909-3p|miR-200b-3p|miR-200c-3p|miR-2355-5p|miR-2682-5p|miR-34a-5p|miR-34b-5p|miR-34c-5p|miR-3613-3p|miR-3714|miR-429|miR-4319|miR-4326|miR-4456|miR-449a|miR-449b-5p|miR-449c-5p|miR-4514|miR-4640-5p|miR-4651|miR-4668-3p|miR-4692|miR-4726-5p|miR-4727-5p|miR-5004-3p|miR-5096|miR-513b-5p|miR-548an|miR-548av-5p|miR-548c-3p|miR-548k|miR-548n|mi…		0.73	-0.25	-0.21	0.98	0.56	0.61	0.61	0.83	1.84	0.4	0.33	1.63	1.41	6.86	6.59284	6.63253	7.3622	6.84439
SEMA3F	sema domain, immunoglobulin domain (Ig), short basic domain, secreted, (semaphorin) 3F	protein coding	ENSG00000001617	6405	04360	GO:0005615|GO:0007411|GO:0021675|GO:0045499|GO:0048846|GO:0061549|GO:0097490|GO:0097491|GO:1902285	let-7a-5p|let-7b-5p|let-7c-5p|let-7d-5p|let-7e-5p|let-7f-5p|let-7g-5p|let-7i-5p|miR-1207-5p|miR-1291|miR-1827|miR-1909-3p|miR-190a-3p|miR-200b-3p|miR-200c-3p|miR-2861|miR-301a-5p|miR-301b-5p|miR-3121-3p|miR-3123|miR-3145-3p|miR-3173-3p|miR-3199|miR-3202|miR-3650|miR-3927-3p|miR-3943|miR-3976|miR-429|miR-4426|miR-4451|miR-4455|miR-4458|miR-4475|miR-4492|miR-4498|miR-4500|miR-4505|miR-451b|miR-4530…	PLEKHN1	-2.14	-0.47	1.51	-1.67	1.66	1.79	1.79	2.44	1.84	0.23	1.03	0.78	1.25	6	5.41952	7.39991	5.25891	5.89276
NXPE3	neurexophilin and PC-esterase domain family, member 3	protein coding	ENSG00000144815	91775			miR-1179|miR-1200|miR-1227-5p|miR-1297|miR-1303|miR-1304-3p|miR-145-5p|miR-181a-2-3p|miR-204-3p|miR-20a-3p|miR-21-3p|miR-223-3p|miR-2681-5p|miR-26a-5p|miR-26b-5p|miR-29b-2-5p|miR-302c-5p|miR-302e|miR-3065-5p|miR-3074-3p|miR-3123|miR-3144-3p|miR-3163|miR-3183|miR-335-5p|miR-337-3p|miR-3591-3p|miR-3606-3p|miR-3613-3p|miR-3653-5p|miR-3664-3p|miR-3671|miR-3692-3p|miR-371b-5p|miR-373-5p|miR-376c-3p|mi…		-0.87	-0.45	-0.06	-0.42	0.67	0.73	0.73	0.99	1.84	0.68	0.07	0.42	1.38	5.54	5.47725	5.86272	4.99183	5.92481
KIAA0195	KIAA0195	protein coding	ENSG00000177728	9772		GO:0005654	miR-1180-5p|miR-1197|miR-1275|miR-1471|miR-149-3p|miR-181a-5p|miR-181b-5p|miR-181c-5p|miR-181d-5p|miR-1915-3p|miR-21-3p|miR-296-5p|miR-3591-3p|miR-4262|miR-4323|miR-4694-3p|miR-4710|miR-4728-5p|miR-4749-3p|miR-4789-5p|miR-5004-5p|miR-5008-5p|miR-6734-5p|miR-6764-5p|miR-6785-5p|miR-6805-5p|miR-6883-5p|miR-7-5p|miR-7114-3p	AGPAT1|INPPL1	-1.27	0.34	0.16	-1.61	0.98	1.06	1.06	1.44	1.84	0.3	0.12	1.51	1.57	4.98	5.48327	5.2994	4.03085	5.13853
Hs.736013		(NA)							-0.94	-0.1	2.71	-0.84	0.73	0.79	0.79	1.07	1.84	0.1	5.83	0.93	6.22	4.7	3.4296	6.24314	5.30035	3.5295
A_33_P3274560		(NA)							-0.97	0.09	1.86	-1.06	0.75	0.81	0.81	1.1	1.84	0.09	3.81	1.23	3.54	4.1	3.43556	5.20854	4.23991	3.34418
LOC101926898	uncharacterized LOC101926898	lncRNA							0.64	0.9	0.14	-0.25	0.5	0.54	0.54	0.73	1.84	2.58	0.23	0.33	2.44	2.56	2.97285	2.21628	2.85791	2.0773
SERPINA12	serpin peptidase inhibitor, clade A (alpha-1 antiproteinase, antitrypsin), member 12	protein coding	ENSG00000165953	145264					-0.97	0.37	1.32	-1.34	0.75	0.81	0.81	1.11	1.84	0.45	2.5	1.68	1.84	2.97	2.79661	3.75229	2.78296	2.42887
A_21_P0005029		(NA)							-0.84	0.48	0.34	-1.33	0.65	0.71	0.71	0.96	1.84	0.78	0.49	2.01	1.6	3	3.39604	3.25036	2.40551	2.91107
A_21_P0010911		(NA)							0.9	0.24	0.33	0.66	0.69	0.75	0.75	1.02	1.84	0.29	0.44	0.72	1.94	2.69	2.45079	2.54585	3.44468	2.21406
A_21_P0011926		(NA)							-0.87	0.23	0.97	-1.1	0.67	0.73	0.73	0.99	1.84	0.29	1.91	1.5	1.45	2.54	2.42085	3.15766	2.2874	2.18969
[truncated: 45,530 more rows]
